# Supplementary material for: Haplotype-Based Single-Step GWAS for Yearling Temperament in American Angus Cattle
Source: MDPI journal article supplement (doi:10.3390/genes13010017), 2021-12-22

## Statistics: percentage variance explained by haplotypes from blocks with LD\_0.15 WssGWAS iteration 1 (ssGWAS)

summary statistics

-----  
min: 0 max: 0.14619  
median: 0.00696  
mean: 0.01038186  
estimated sd: 0.01104523  
estimated skewness: 2.434889  
estimated kurtosis: 13.02973

Cullen and Frey graph

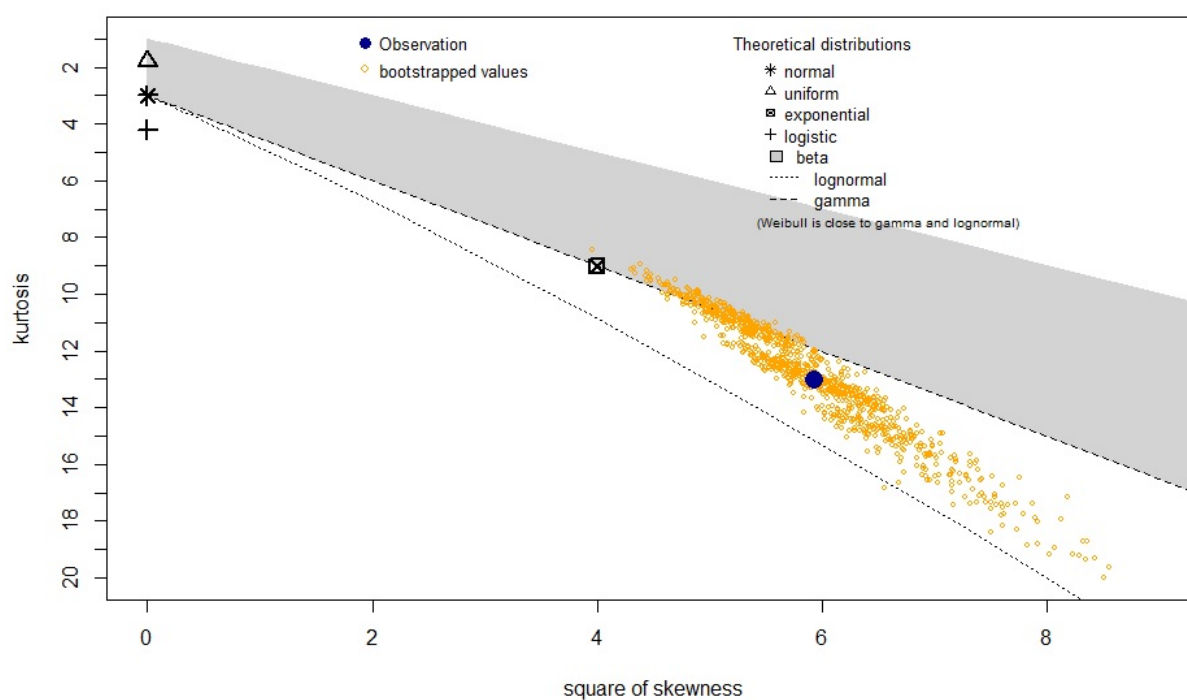

Fitting of the distribution 'beta' by matching moments

Parameters :

estimate  
shape1 0.8640248  
shape2 82.3604749

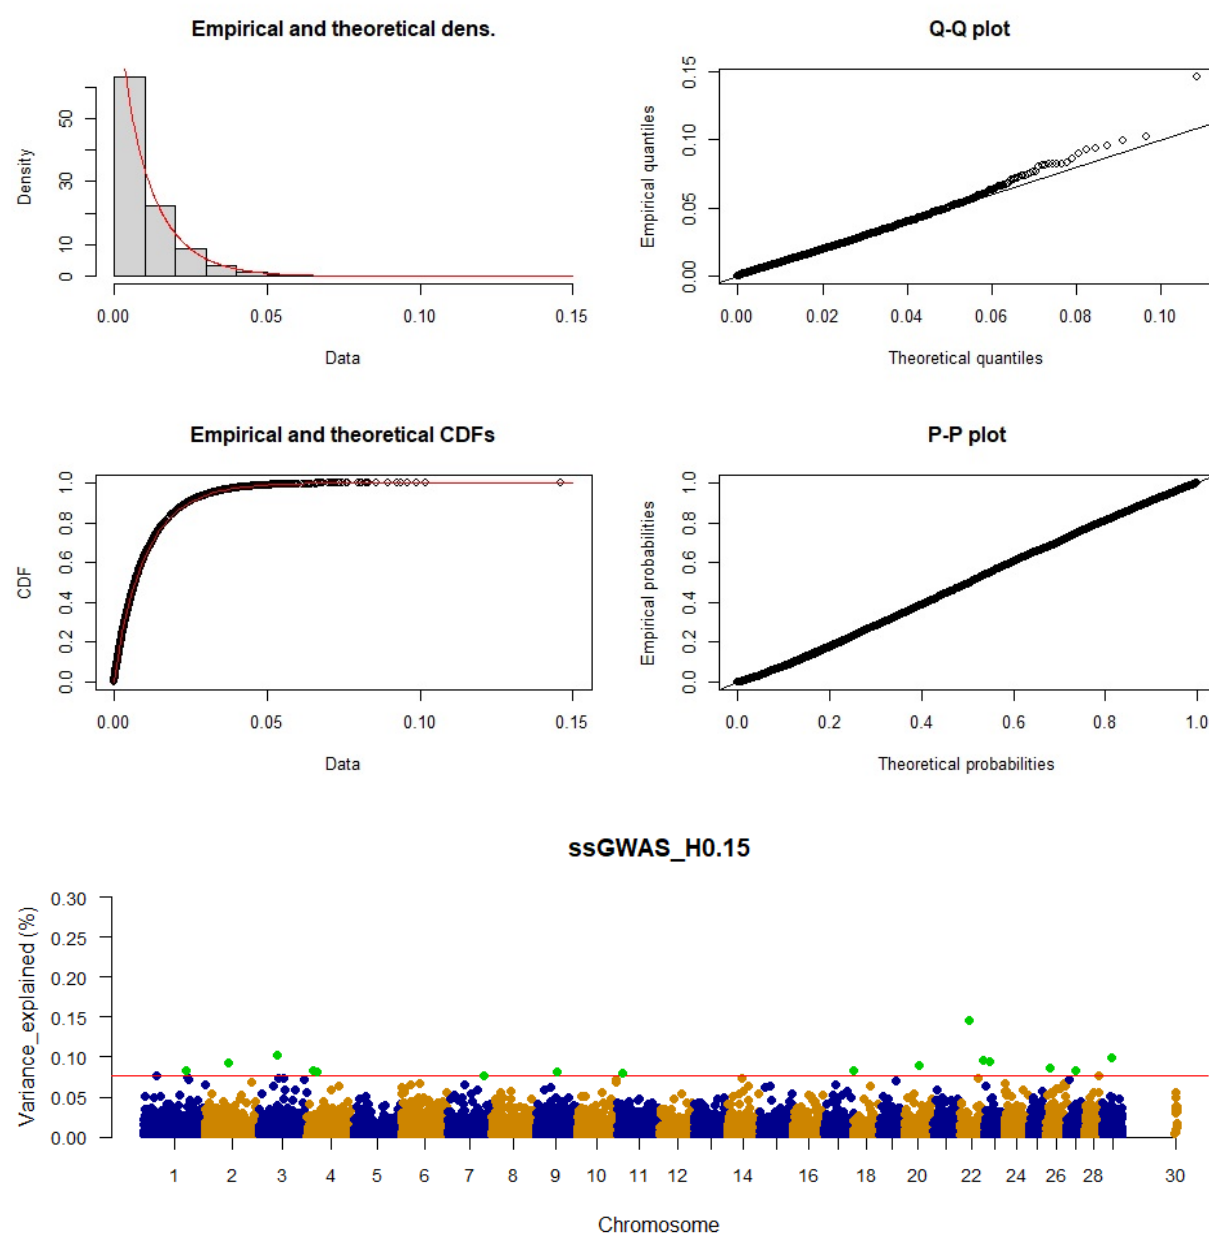

**Statistics: percentage variance explained by haplotypes from blocks with LD\_0.15  
WssGWAS iteration 2 (WssGWAS)**

## summary statistics

-----

min: 0 max: 0.11174

median: 0.00722

mean: 0.01038182

estimated sd: 0.0103068

estimated skewness: 2.014777

estimated kurtosis: 9.237767

Cullen and Frey graph

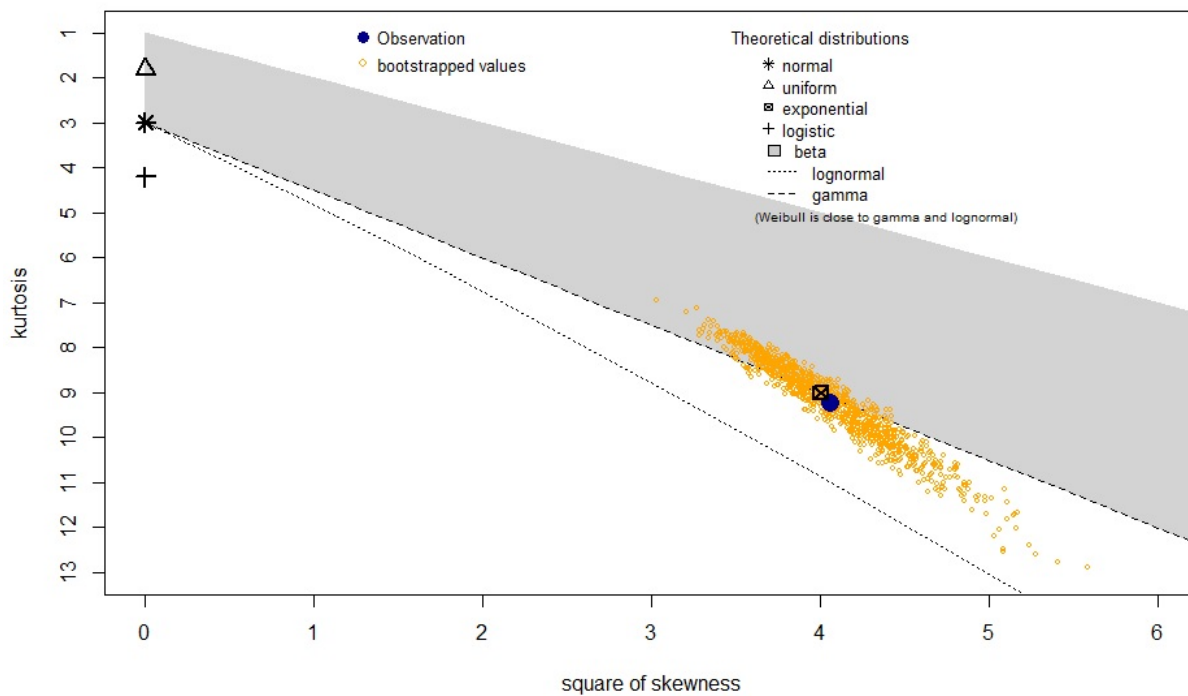

Fitting of the distribution 'beta' by matching moments

Parameters :

estimate

shape1 0.9938006

shape2 94.7312646

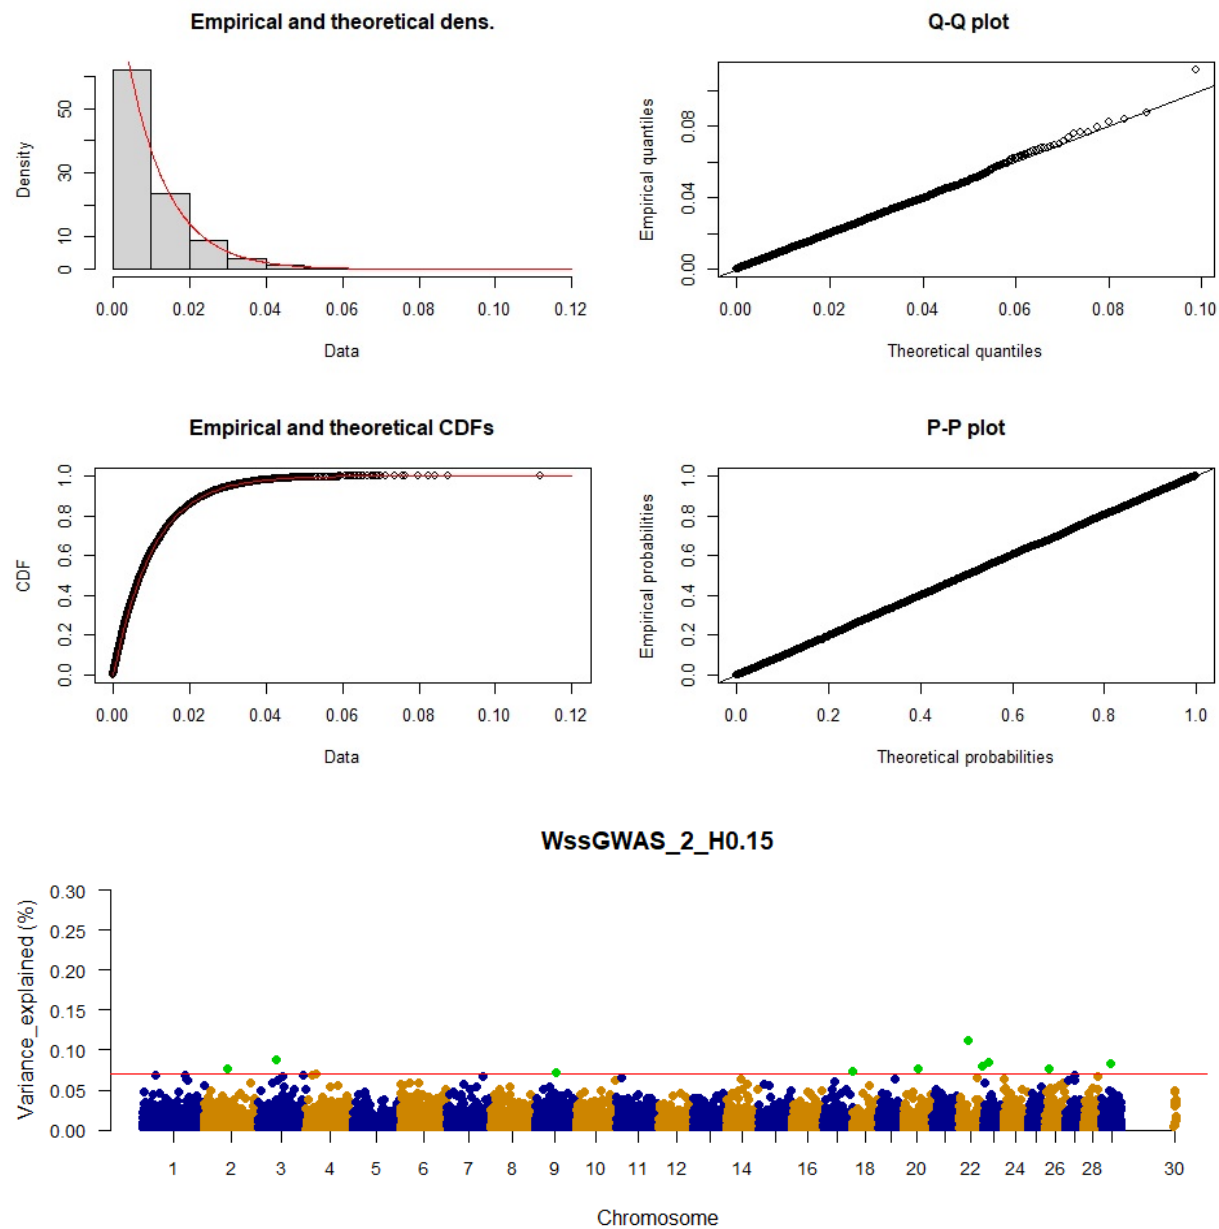

**Statistics: percentage variance explained by haplotypes from blocks with LD\_0.15  
WssGWAS iteration 3 (WssGWAS)**

## summary statistics

-----

min: 0 max: 0.11876

median: 0.0072

mean: 0.01038177

estimated sd: 0.01039503

estimated skewness: 2.085039

estimated kurtosis: 9.878912

Cullen and Frey graph

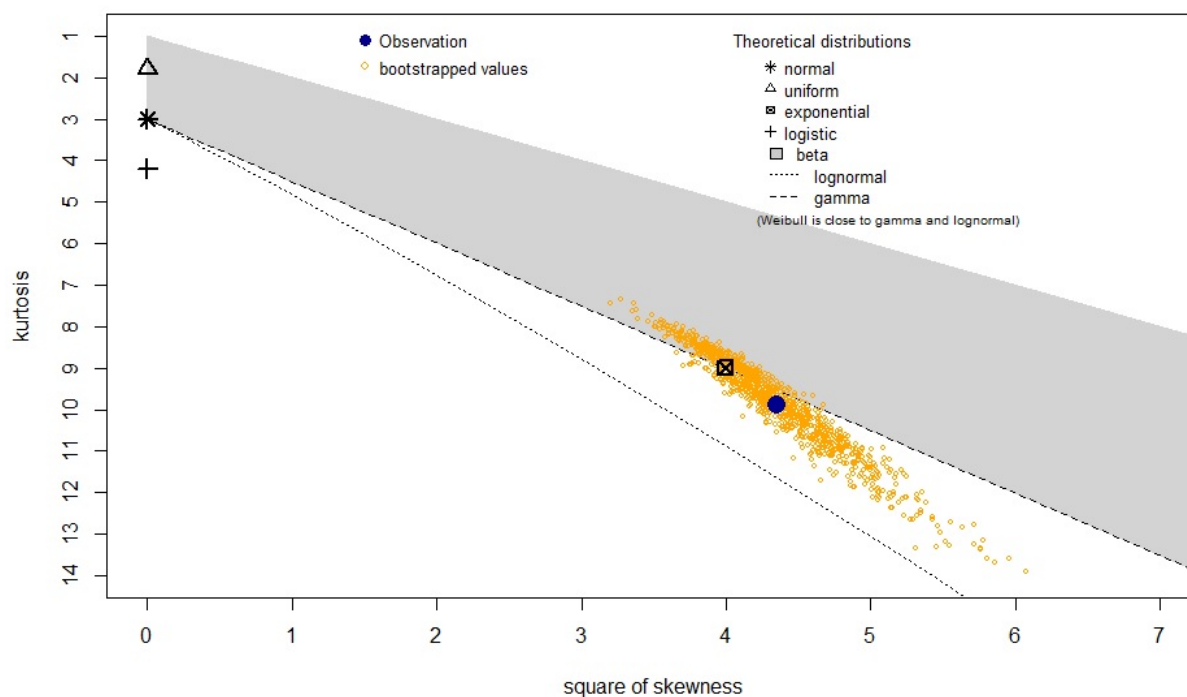

Fitting of the distribution ' gamma ' by matching moments

Parameters :

estimate

shape 0.9975547

rate 96.0871396

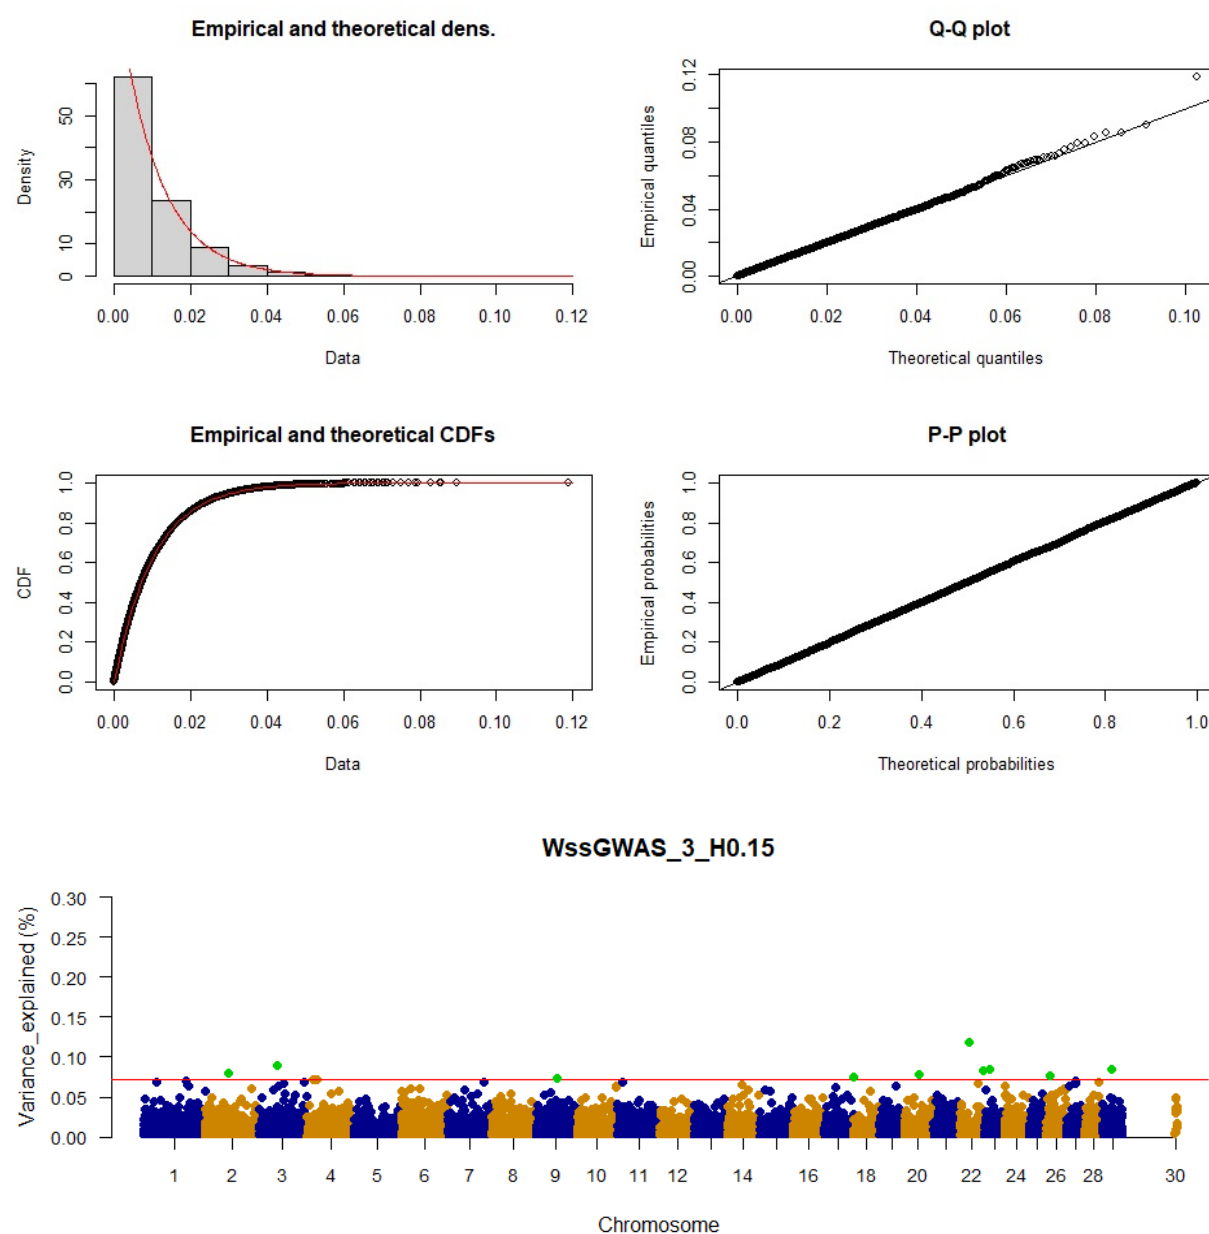

**Statistics: percentage variance explained by haplotypes from blocks with LD\_0.50  
WssGWAS iteration 1 (ssGWAS)**

## summary statistics

-----

min: 0 max: 0.1623

median: 0.01234

mean: 0.01780299

estimated sd: 0.01780225

estimated skewness: 2.127498

estimated kurtosis: 9.980306

Cullen and Frey graph

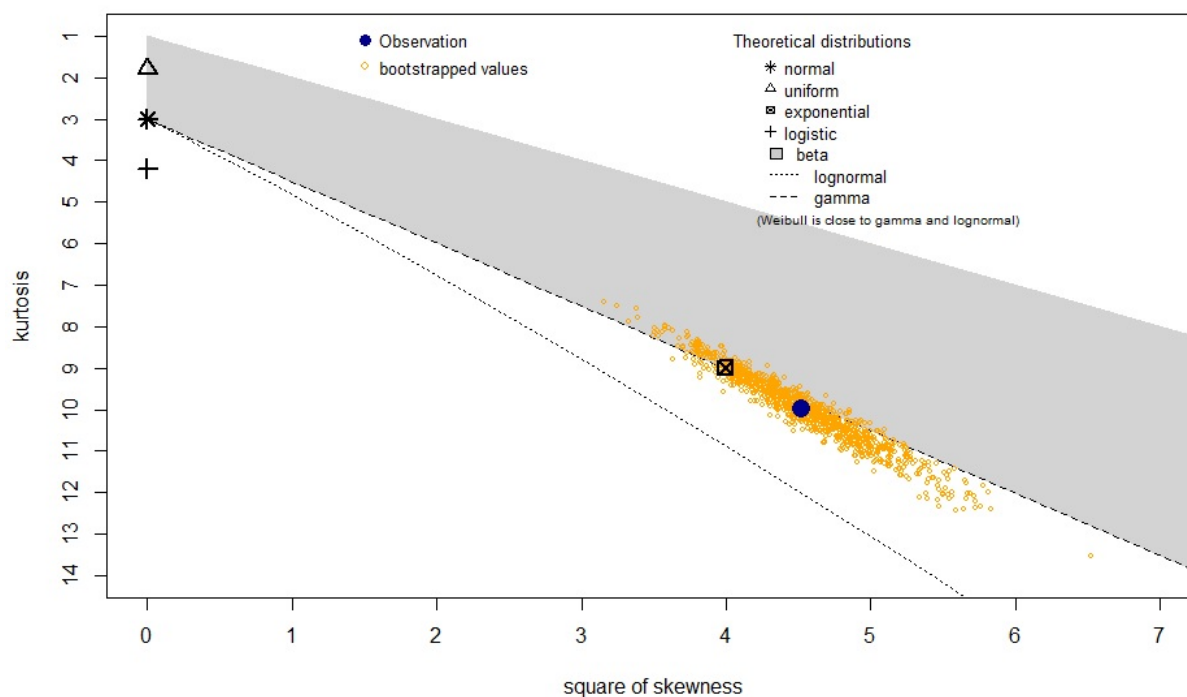

Fitting of the distribution 'beta' by matching moments

Parameters :

estimate

shape1 0.9646514

shape2 53.2201335

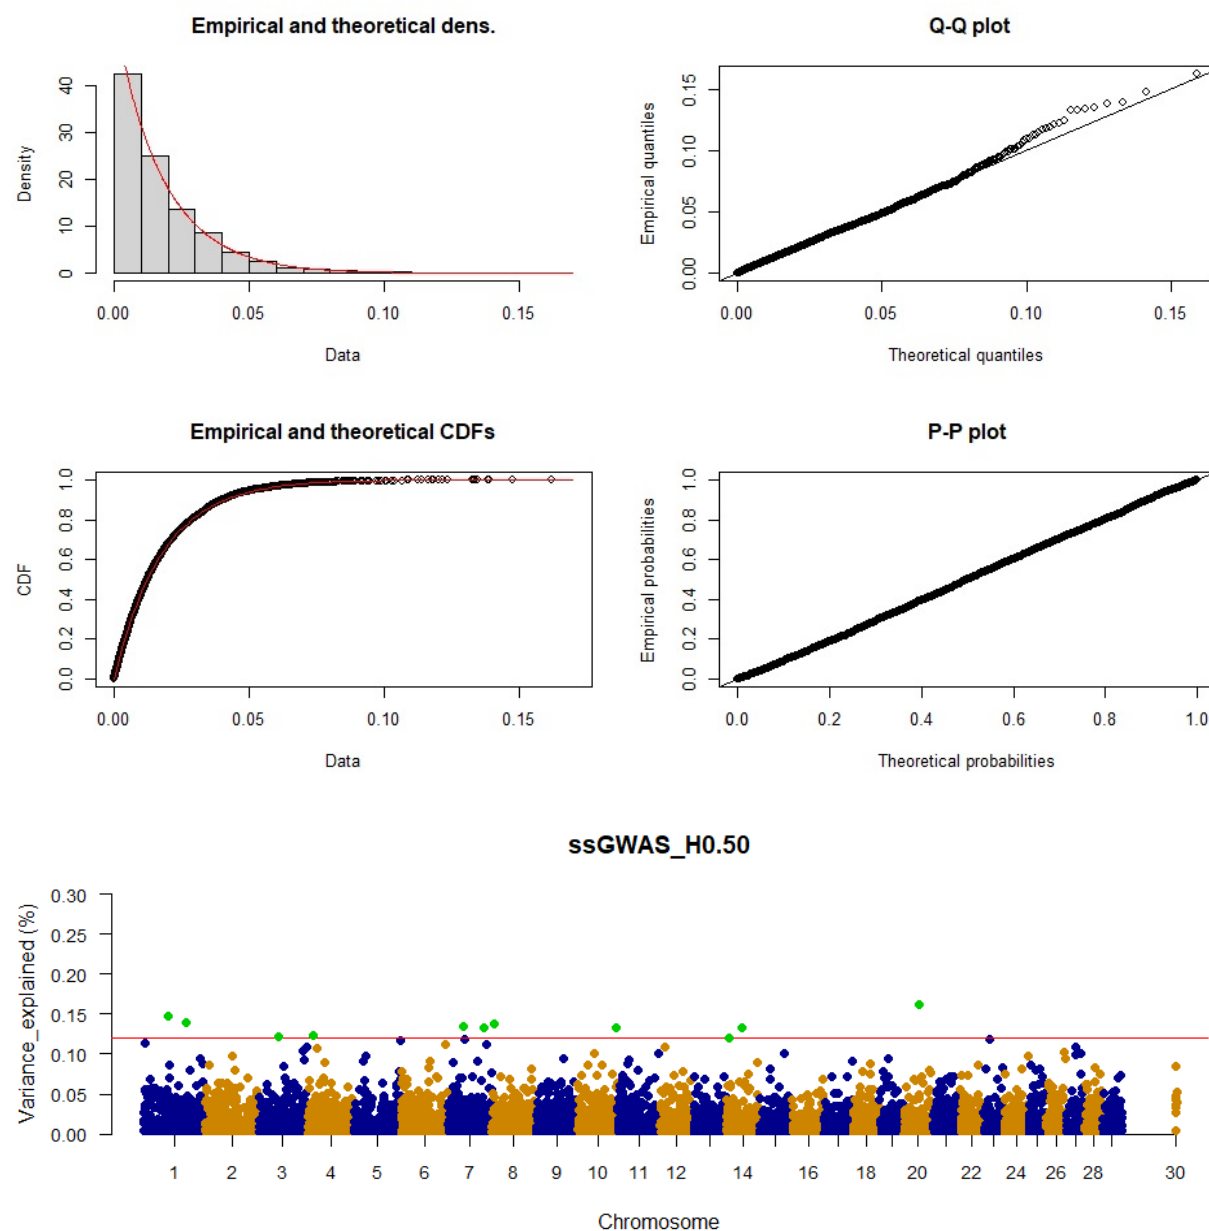

**Statistics: percentage variance explained by haplotypes from blocks with LD\_0.50  
WssGWAS iteration 2 (WssGWAS)**



## summary statistics

-----

min: 0 max: 0.13383

median: 0.01303

mean: 0.01780287

estimated sd: 0.01635826

estimated skewness: 1.69526

estimated kurtosis: 7.043574

Cullen and Frey graph

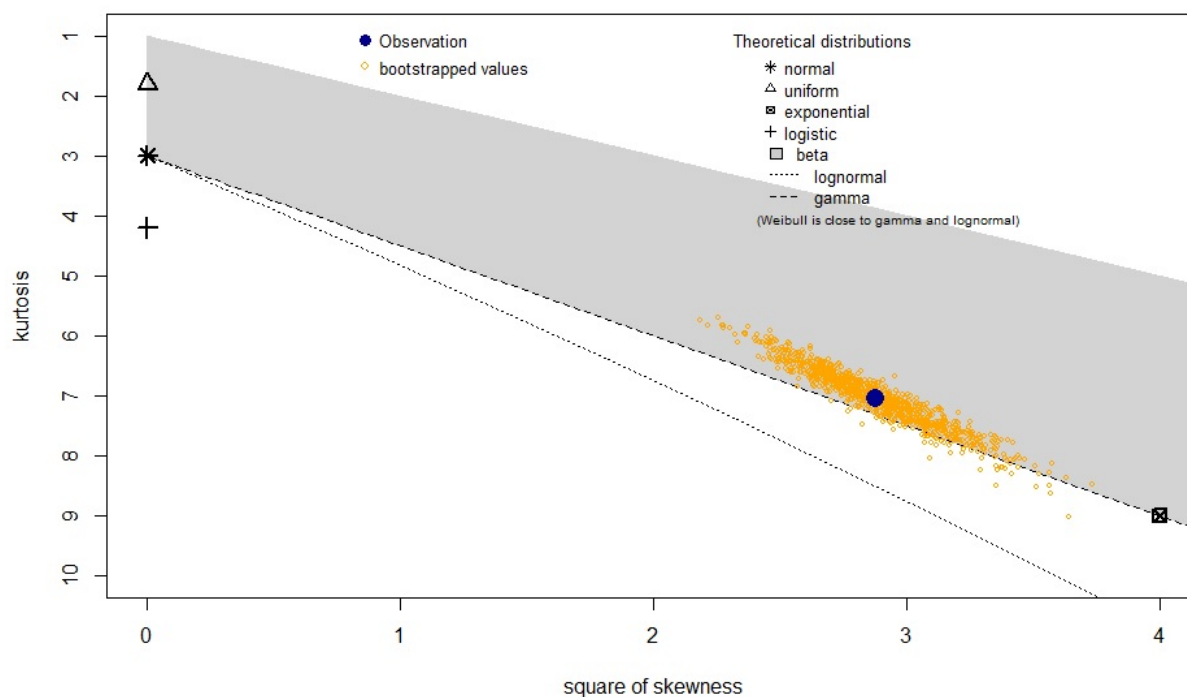

Fitting of the distribution 'beta' by matching moments

Parameters :

estimate

shape1 1.145738

shape2 63.211191

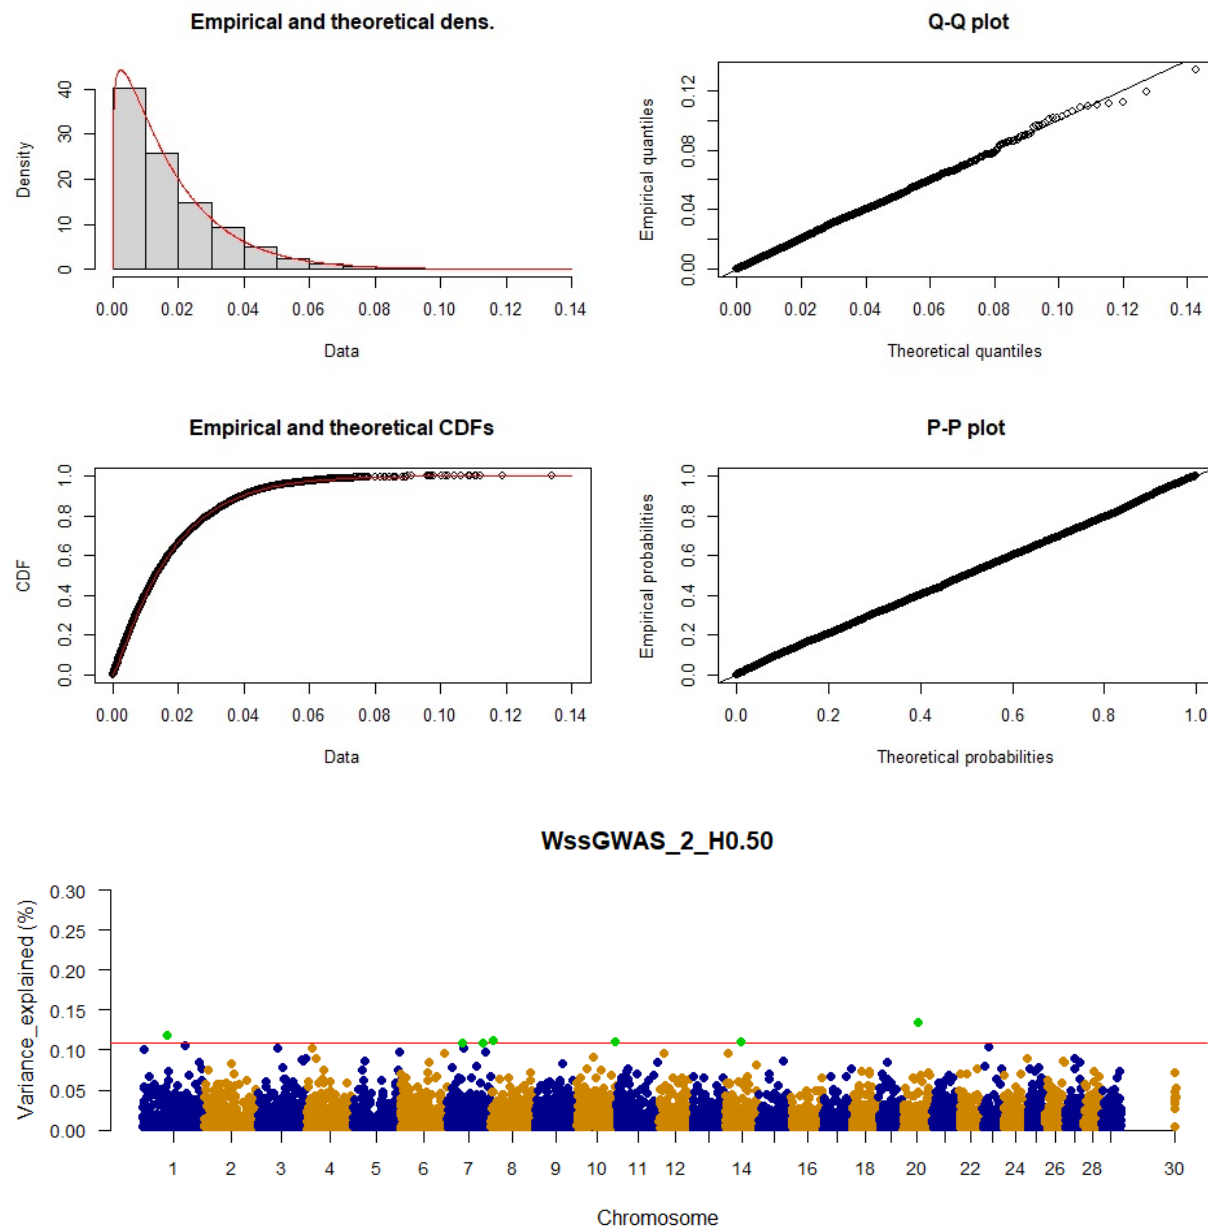

**Statistics: percentage variance explained by haplotypes from blocks with LD\_0.50  
WssGWAS iteration 3 (WssGWAS)**

## summary statistics

-----

min: 0 max: 0.13975

median: 0.01295

mean: 0.01780288

estimated sd: 0.01654919

estimated skewness: 1.775167

estimated kurtosis: 7.591097

## Cullen and Frey graph

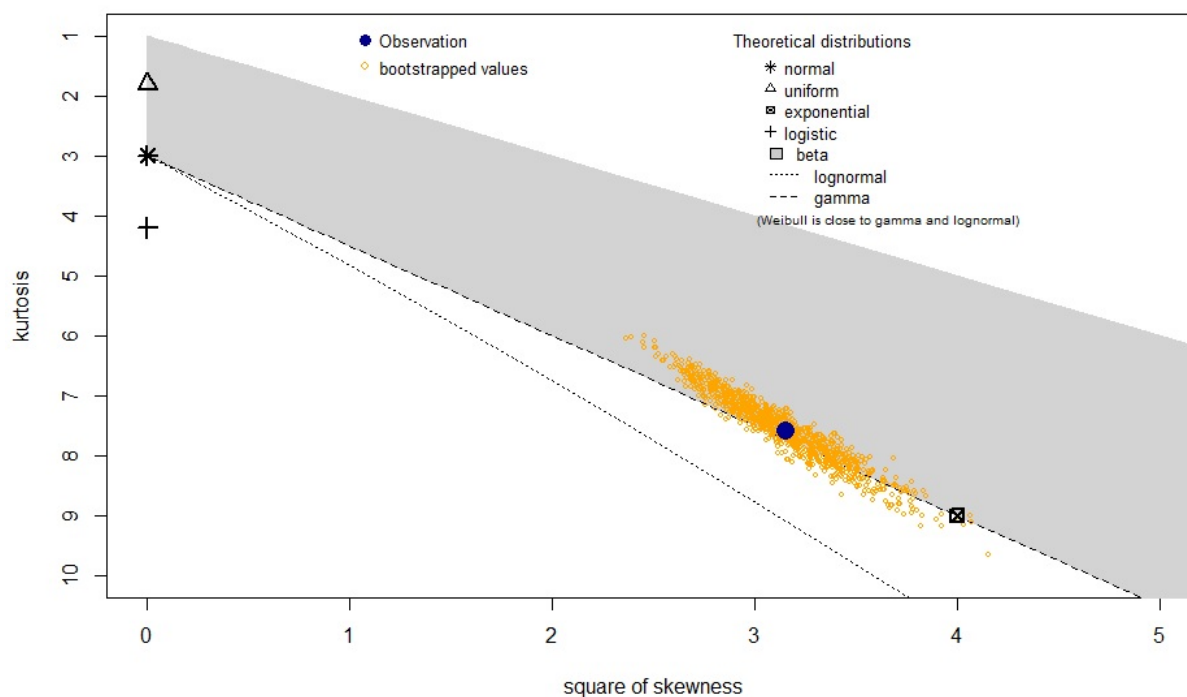

## Fitting of the distribution 'beta' by matching moments

Parameters :

estimate

shape1 1.119046

shape2 61.738552

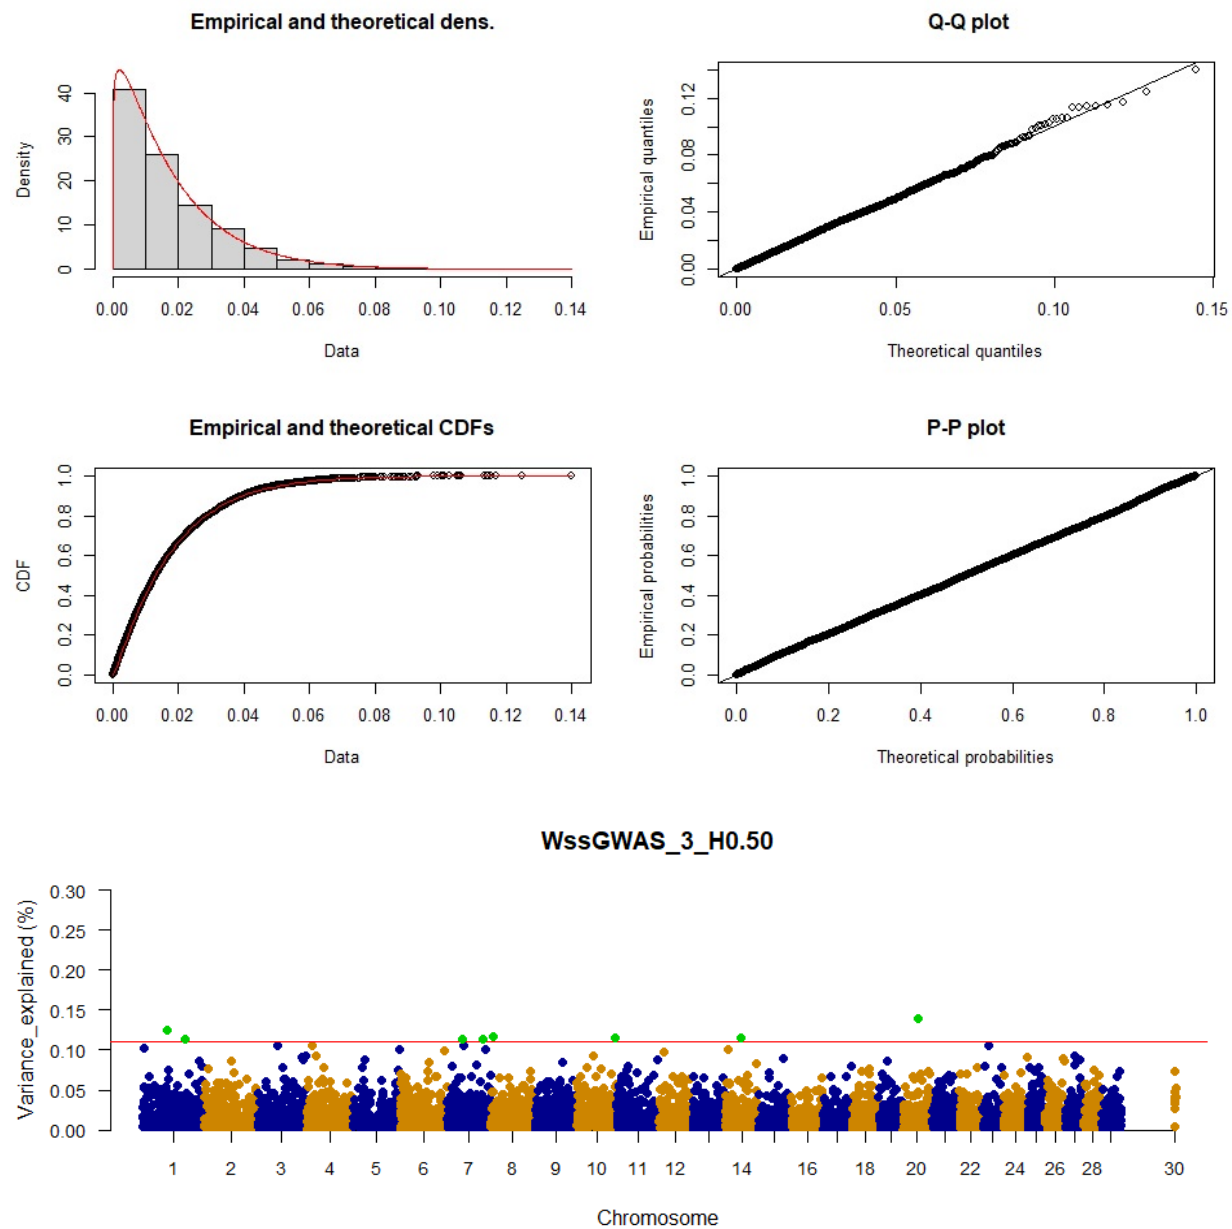

**Statistics: percentage variance explained by haplotypes from blocks with LD\_0.80  
WssGWAS iteration 1 (ssGWAS)**

## summary statistics

-----

min: 0 max: 0.27178

median: 0.02626

mean: 0.03675104

estimated sd: 0.0349454

estimated skewness: 1.951988

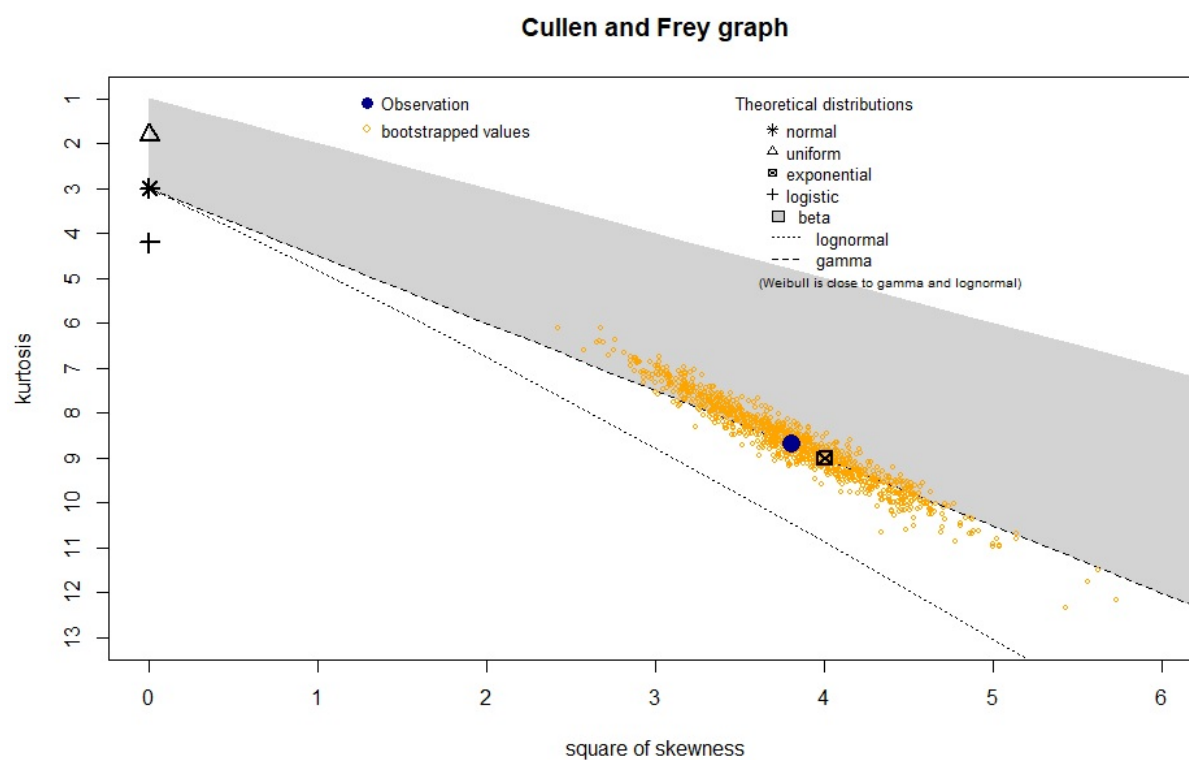

Fitting of the distribution 'beta' by matching moments

Parameters :

estimate

shape1 1.029004

shape2 26.970321

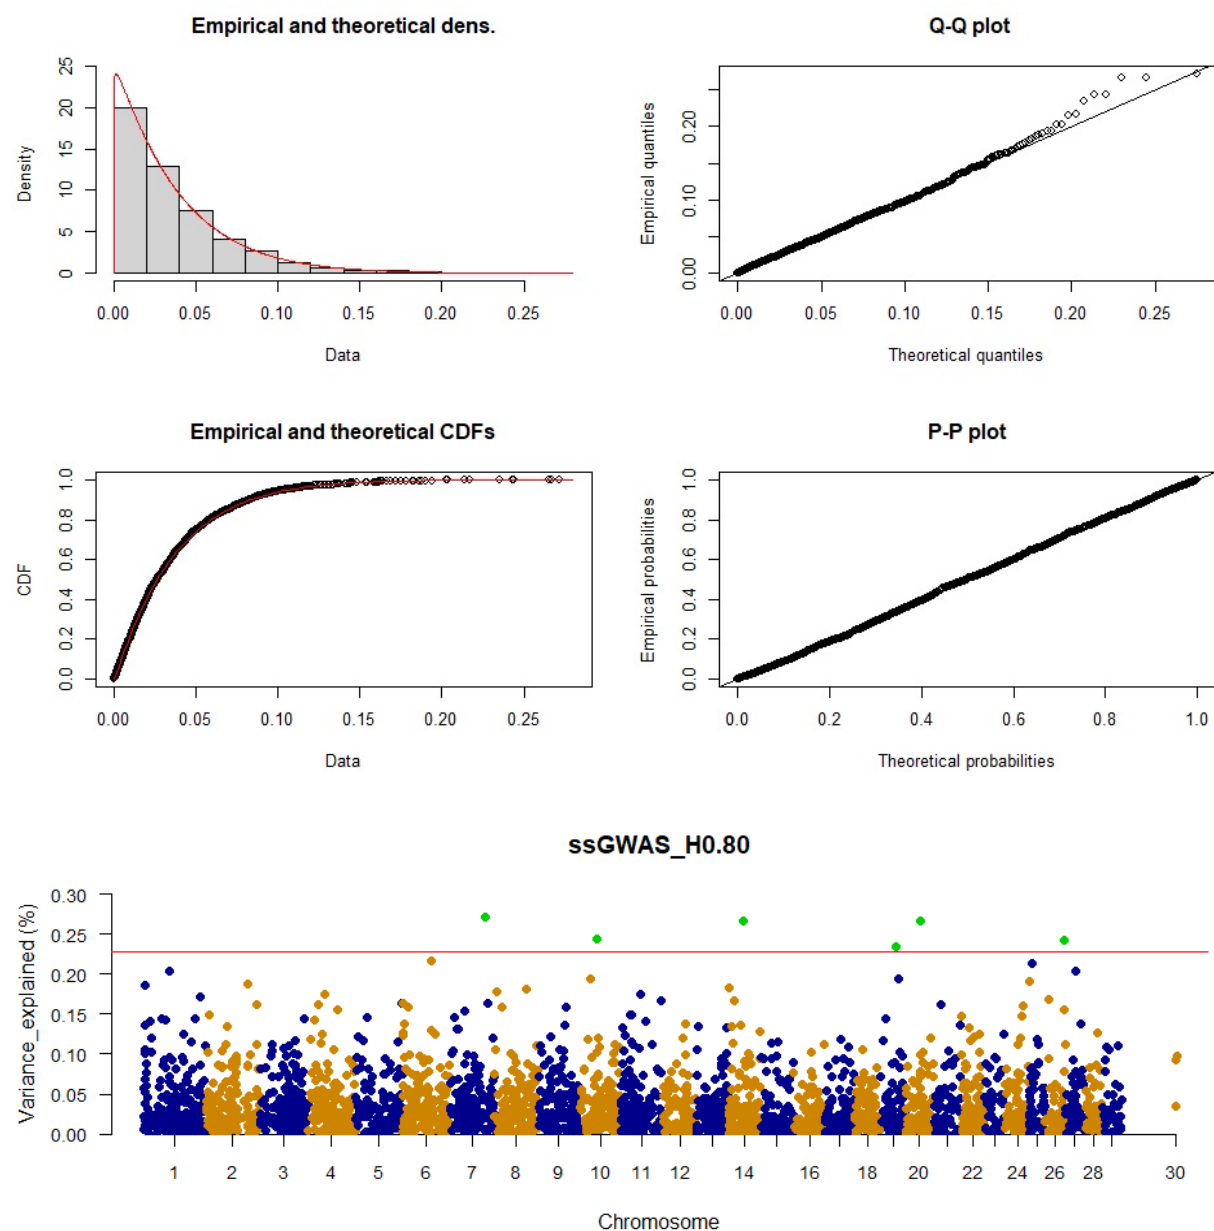

**Statistics: percentage variance explained by haplotypes from blocks with LD\_0.80  
WssGWAS iteration 2 (WssGWAS)**

## summary statistics

-----

min: 0 max: 0.21691

median: 0.02794

mean: 0.03675115

estimated sd: 0.03164835

estimated skewness: 1.533357

estimated kurtosis: 6.171605

## Cullen and Frey graph

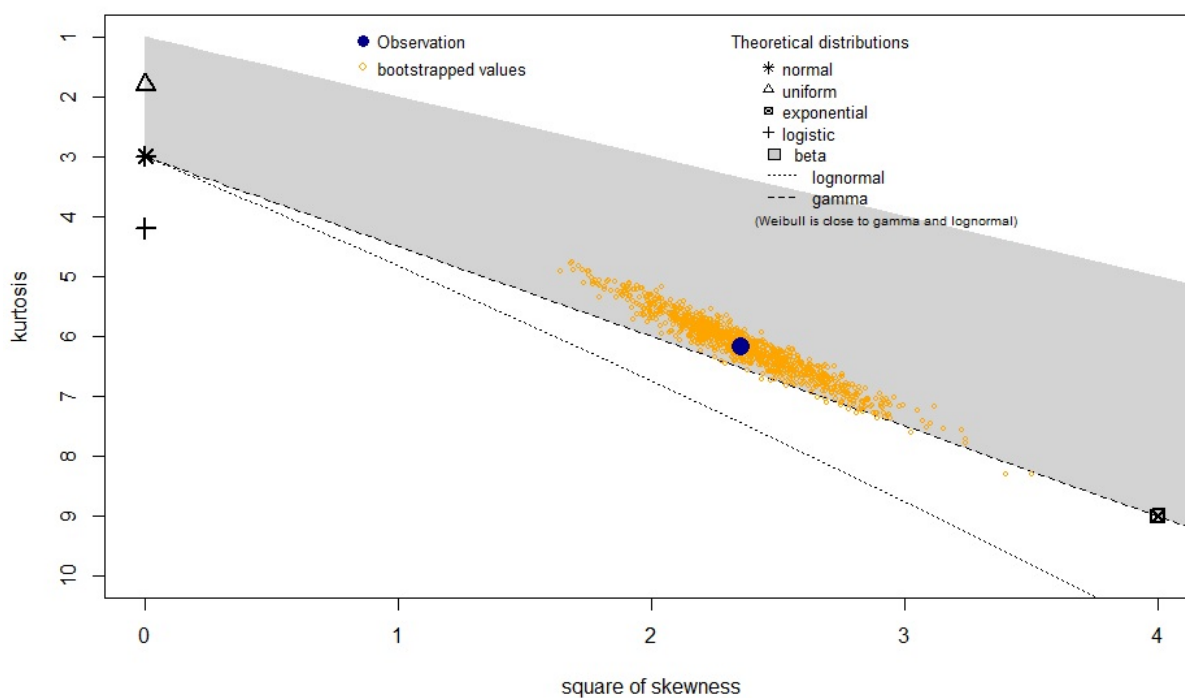

## Fitting of the distribution 'beta' by matching moments

Parameters :

estimate

shape1 1.262633

shape2 33.093668

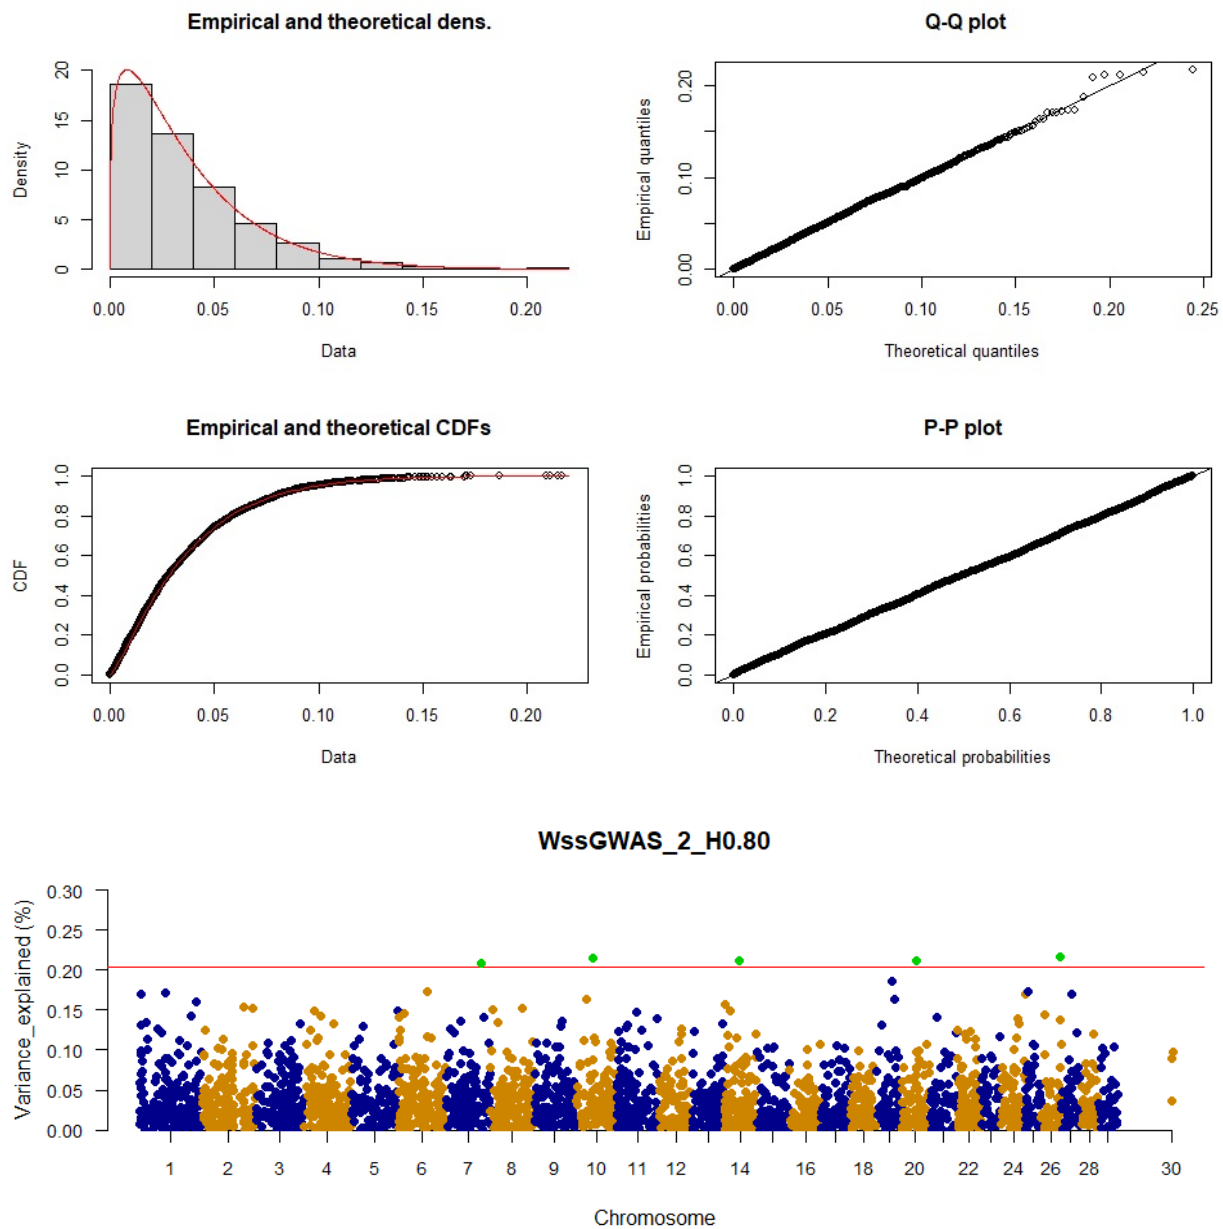

**Statistics: percentage variance explained by haplotypes from blocks with LD\_0.80  
WssGWAS iteration 3 (WssGWAS)**



## summary statistics

-----

min: 0 max: 0.22334

median: 0.02774

mean: 0.03675105

estimated sd: 0.03212226

estimated skewness: 1.619313

estimated kurtosis: 6.679214

Cullen and Frey graph

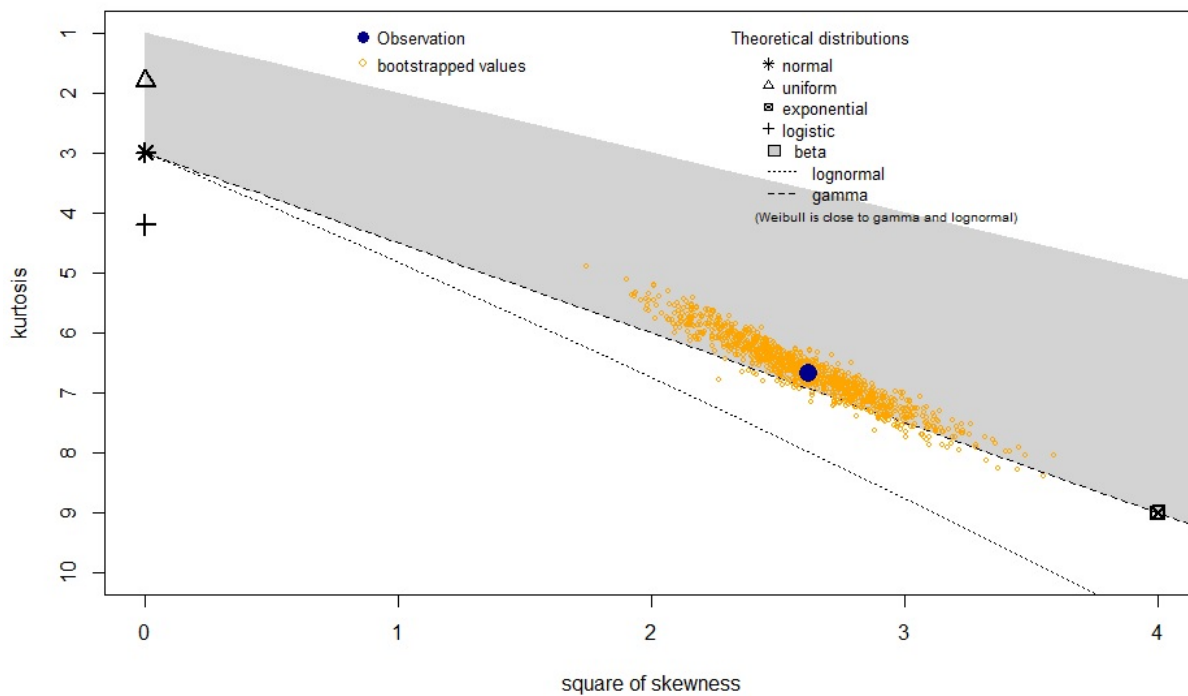

Fitting of the distribution 'beta' by matching moments

Parameters :

estimate

shape1 1.224569

shape2 32.096091

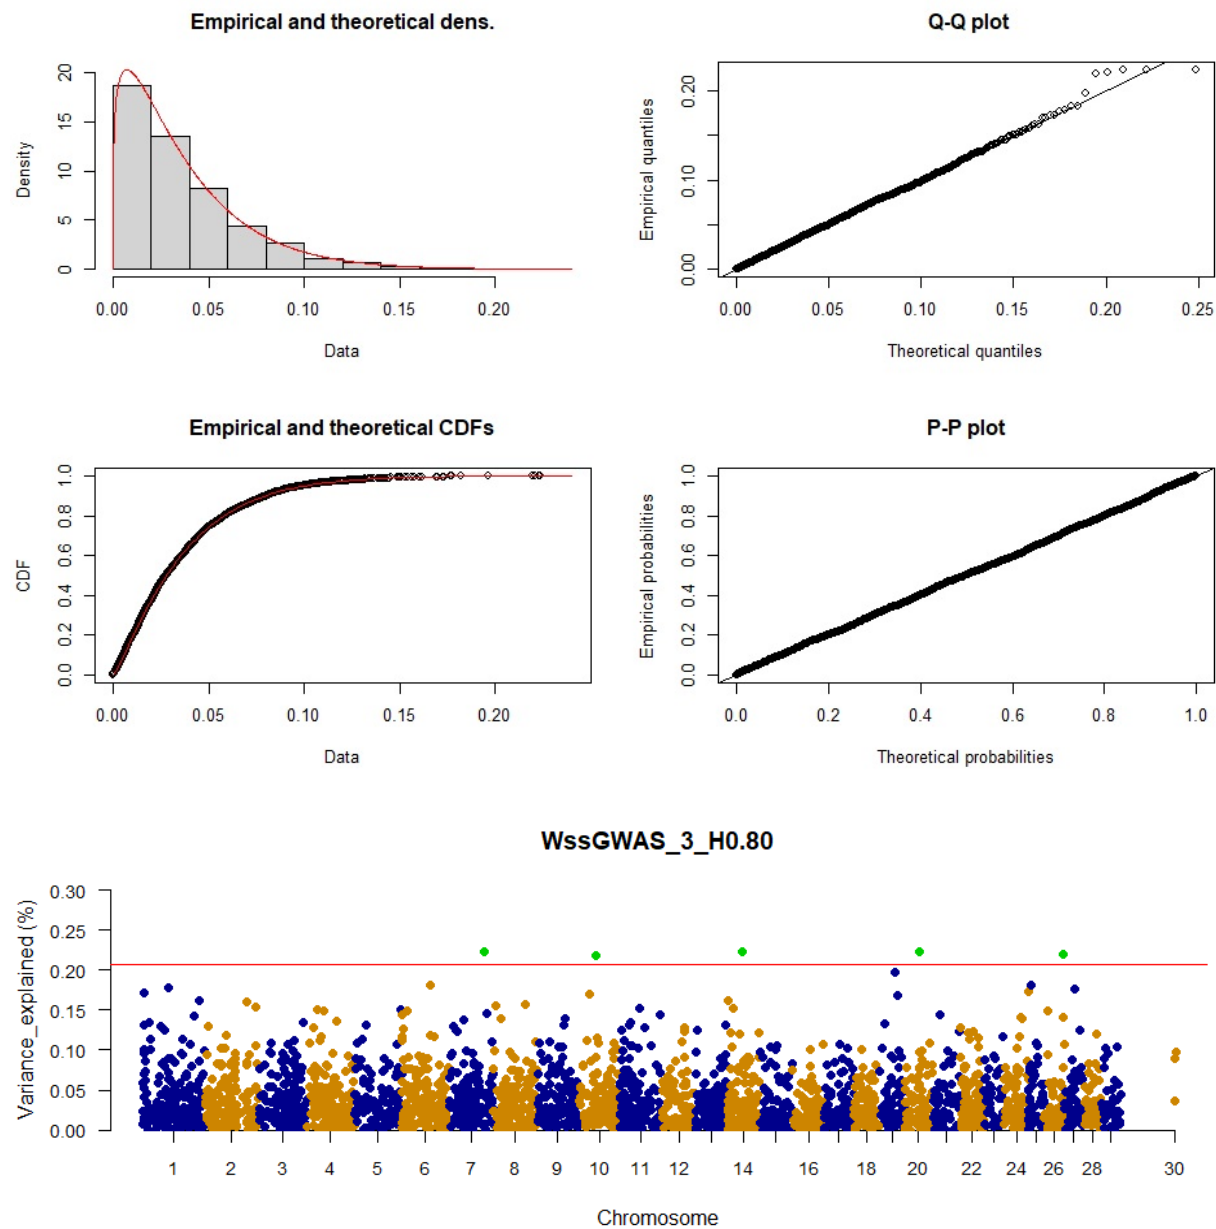

**Statistics: percentage variance explained by haplotypes and non-clustered SNPs from blocks with LD\_0.15**  
**WssGWAS iteration 1 (ssGWAS)**

## summary statistics

-----

min: 0 max: 0.08996

median: 0.00102

mean: 0.003277807

estimated sd: 0.005750574

estimated skewness: 3.888373

estimated kurtosis: 26.44834

Cullen and Frey graph

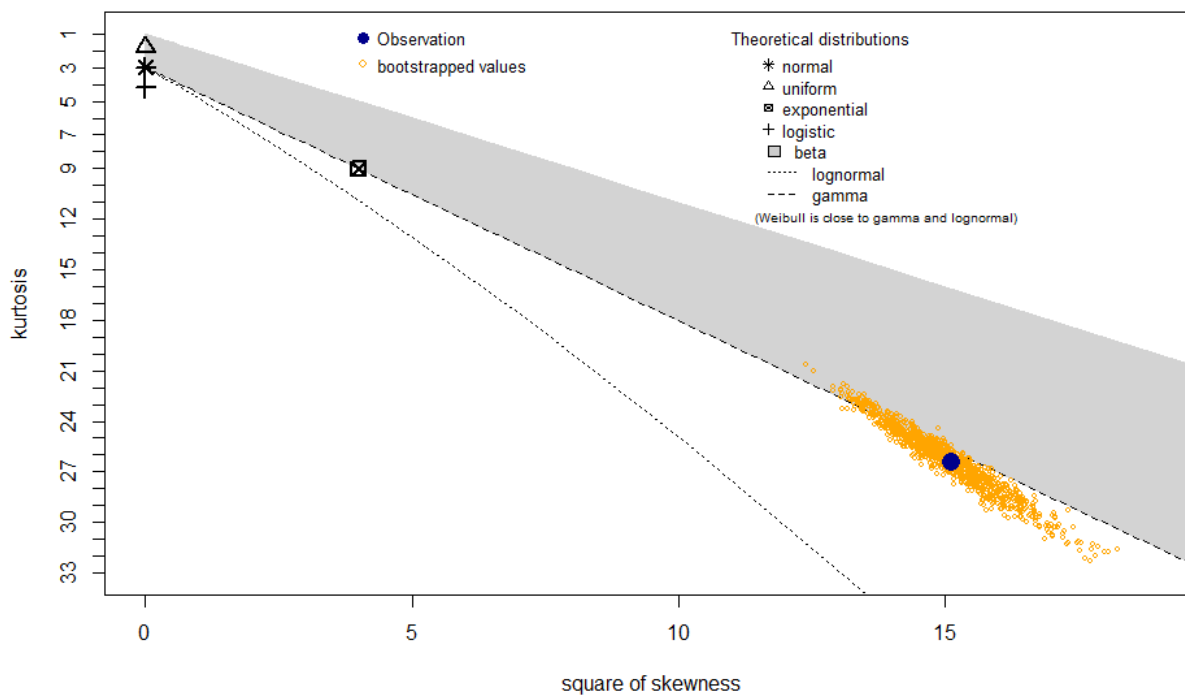

Fitting of the distribution ' gamma ' by matching moments

Parameters :

estimate

shape 0.3249067

rate 99.1231862

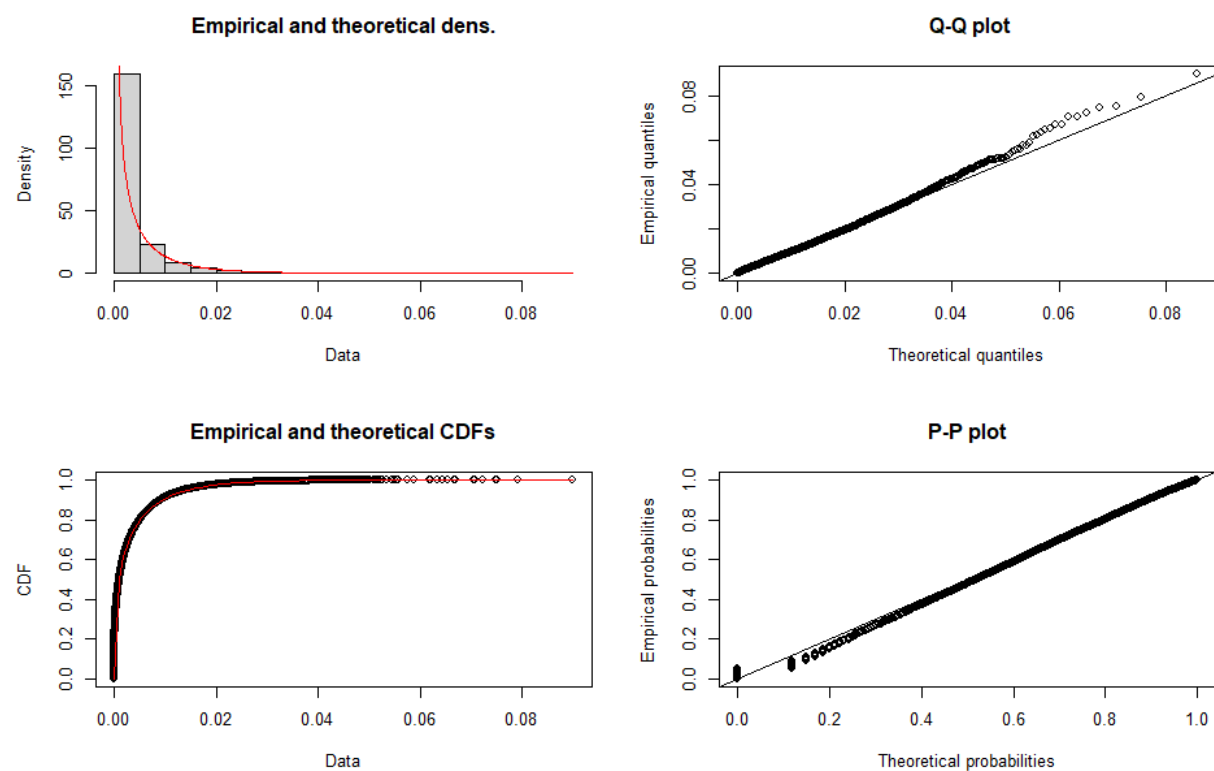

### ssGWAS\_NCSNP\_H0.15

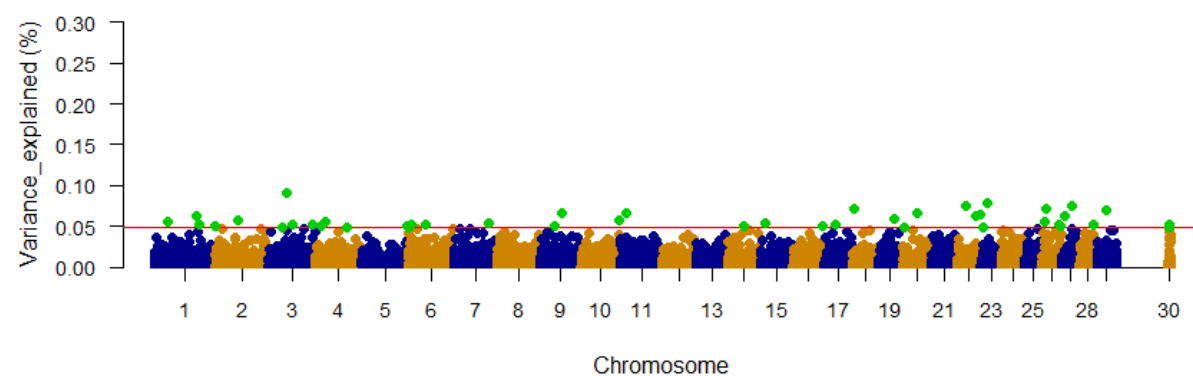

**Statistics: percentage variance explained by haplotypes and non-clustered SNPs from blocks with LD\_0.15**

## WssGWAS iteration 2 (WssGWAS)

summary statistics

-----

min: 0 max: 0.07945

median: 0.00105

mean: 0.003277817

estimated sd: 0.00553031

estimated skewness: 3.507454

estimated kurtosis: 21.40061

Cullen and Frey graph

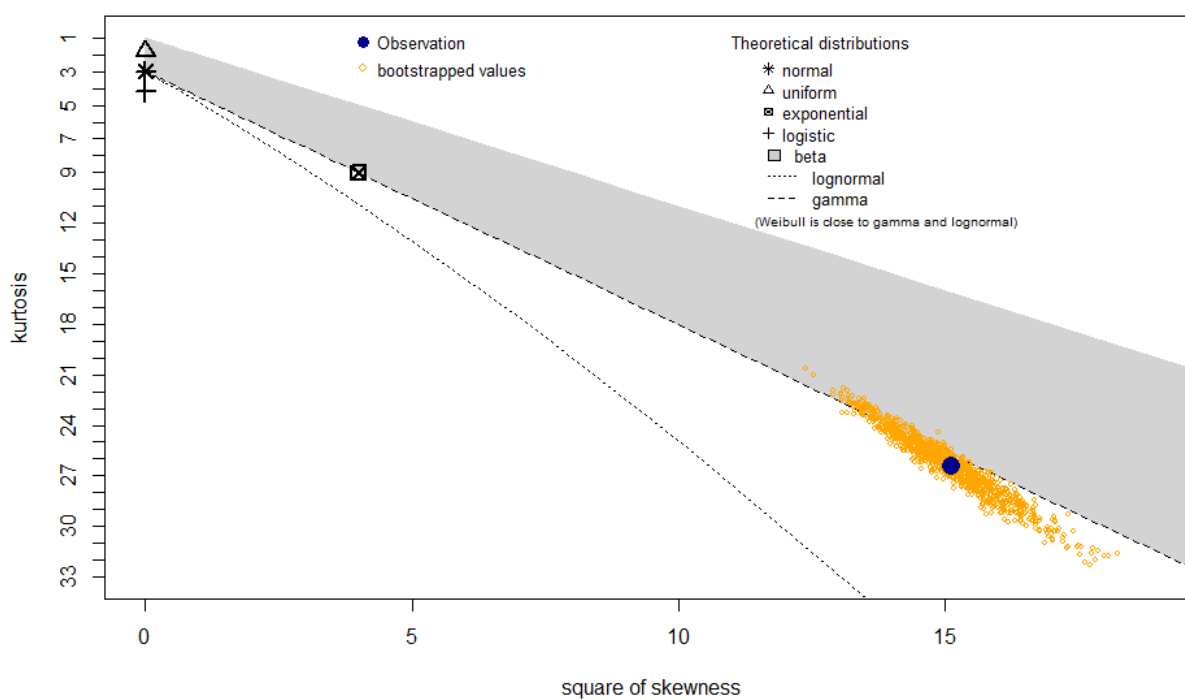

Fitting of the distribution ' gamma ' by matching moments

Parameters :

estimate

shape 0.3513052

rate 107.176587

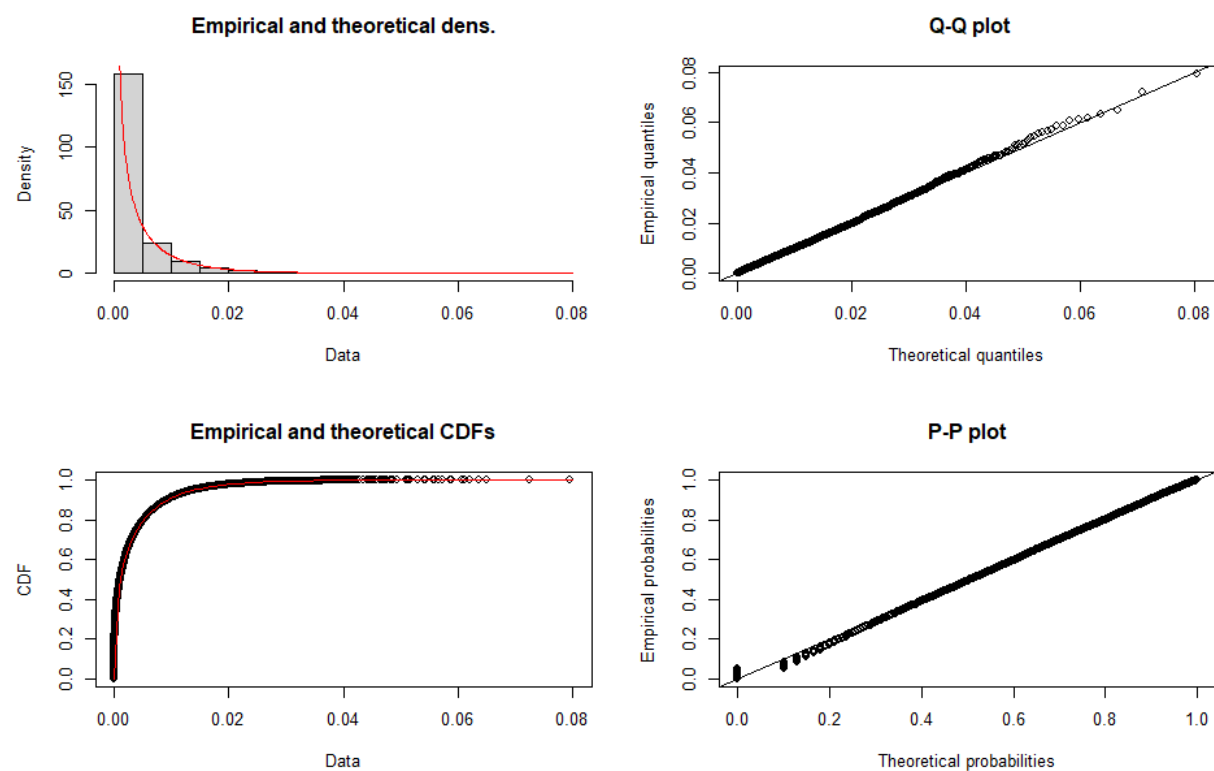

### WssGWAS\_2\_NCSNP\_H0.15

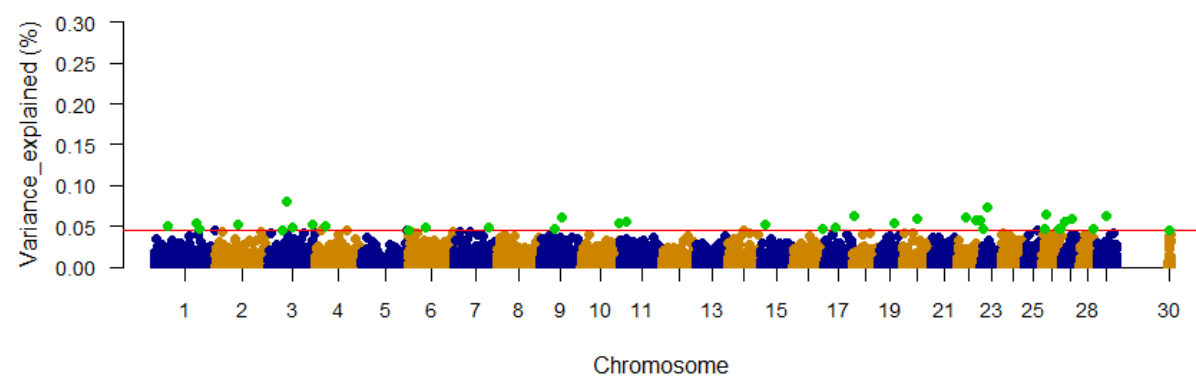

## Statistics: percentage variance explained by haplotypes and non-clustered SNPs from blocks with LD\_0.15

### WssGWAS iteration 3 (WssGWAS)

summary statistics

-----

min: 0 max: 0.07761

median: 0.00106

mean: 0.003277773

estimated sd: 0.005503608

estimated skewness: 3.448596

estimated kurtosis: 20.62088

**Cullen and Frey graph**

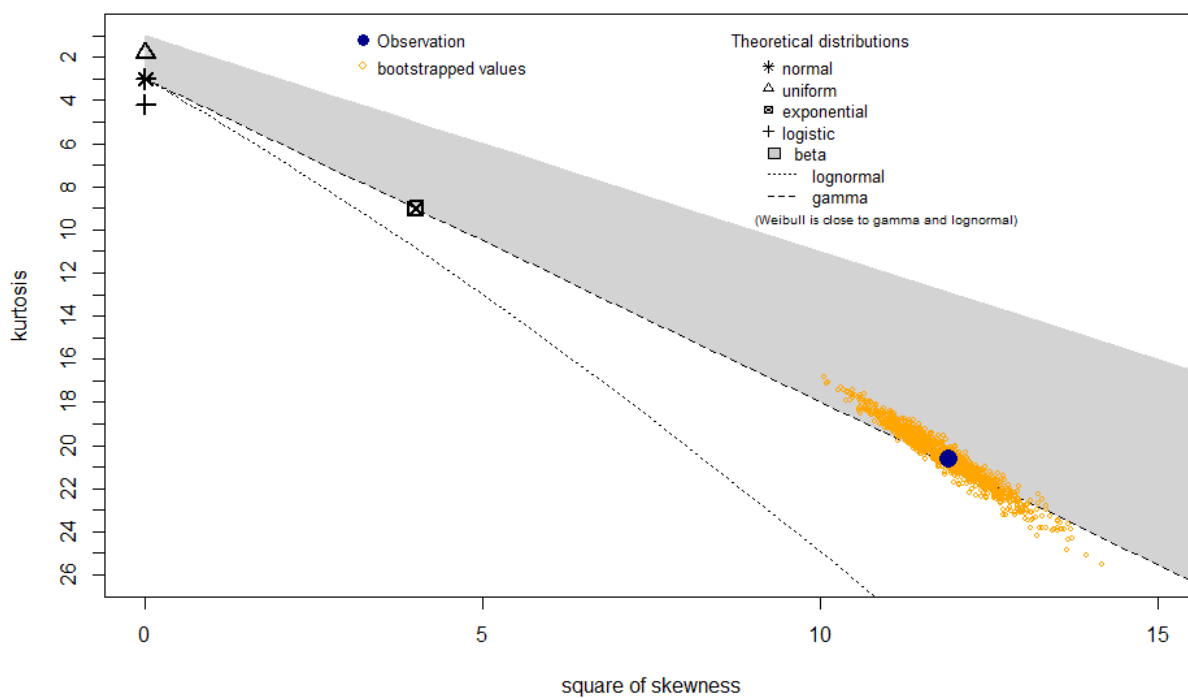

Fitting of the distribution ' gamma ' by matching moments

Parameters :

estimate

shape 0.3547129

rate 108.2176497

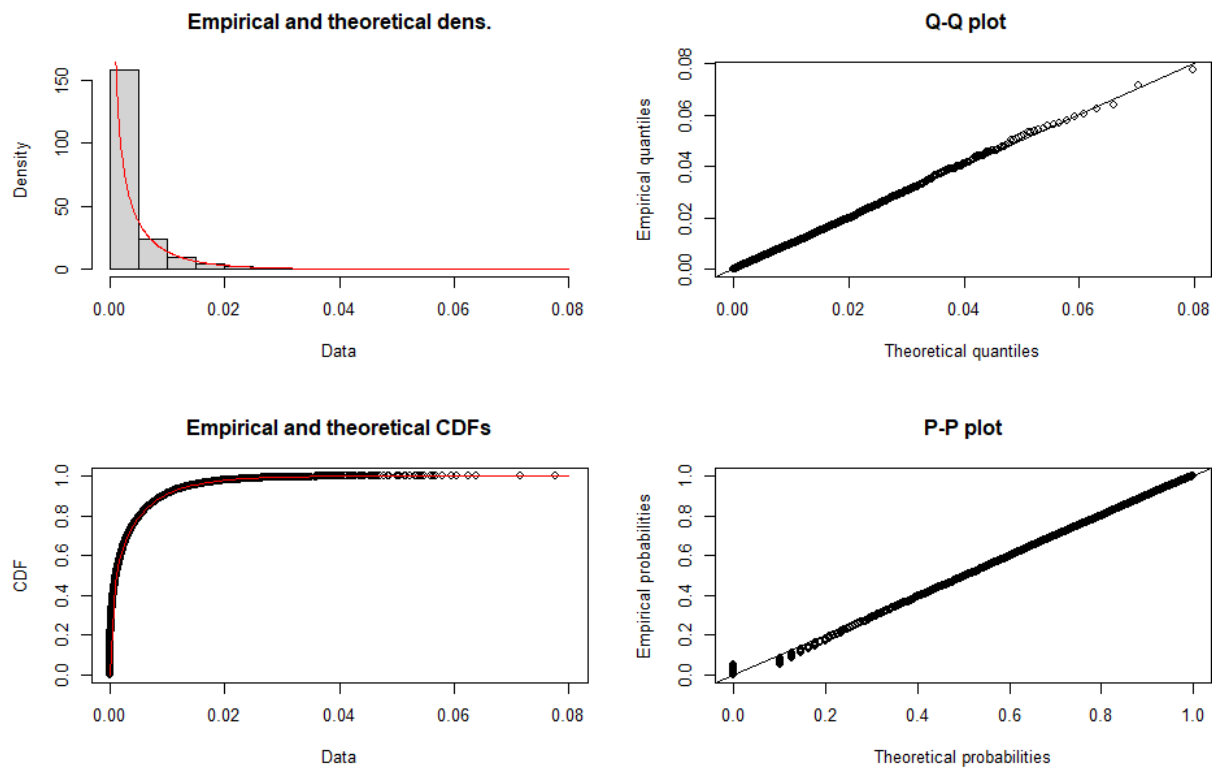

### WssGWAS\_3\_NCSNP\_H0.15

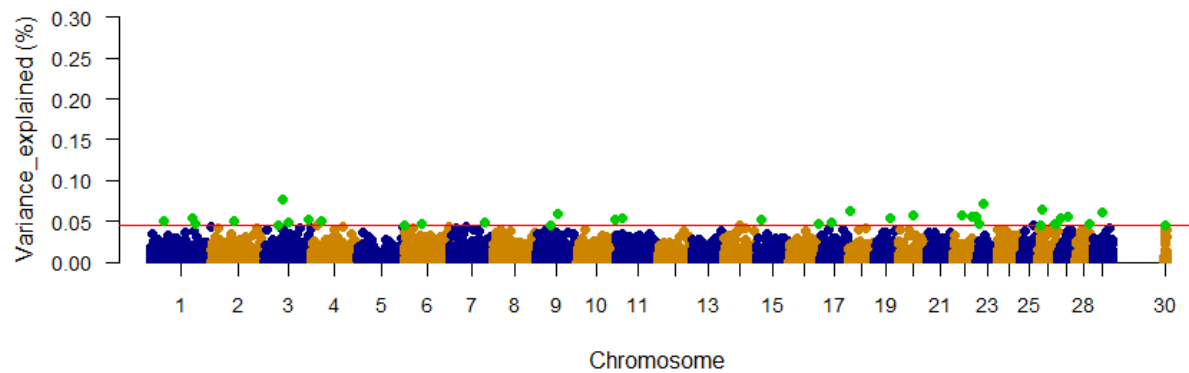

**Statistics: percentage variance explained by haplotypes and non-clustered SNPs from blocks with LD\_0.50**  
**WssGWAS iteration 1 (ssGWAS)**



## summary statistics

-----

min: 0 max: 0.09132

median: 8e-04

mean: 0.002766918

estimated sd: 0.0051877

estimated skewness: 4.430503

estimated kurtosis: 33.8731

## Cullen and Frey graph

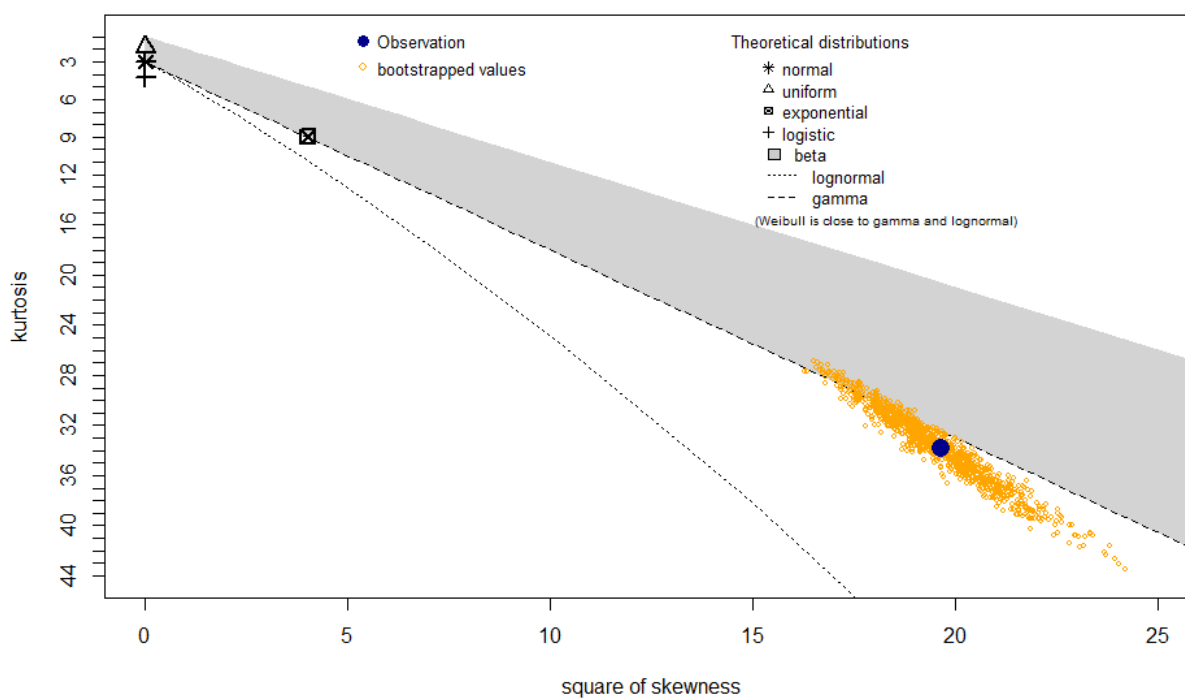

Fitting of the distribution ' gamma ' by matching moments

Parameters :

estimate

shape 0.284482

rate 102.815498

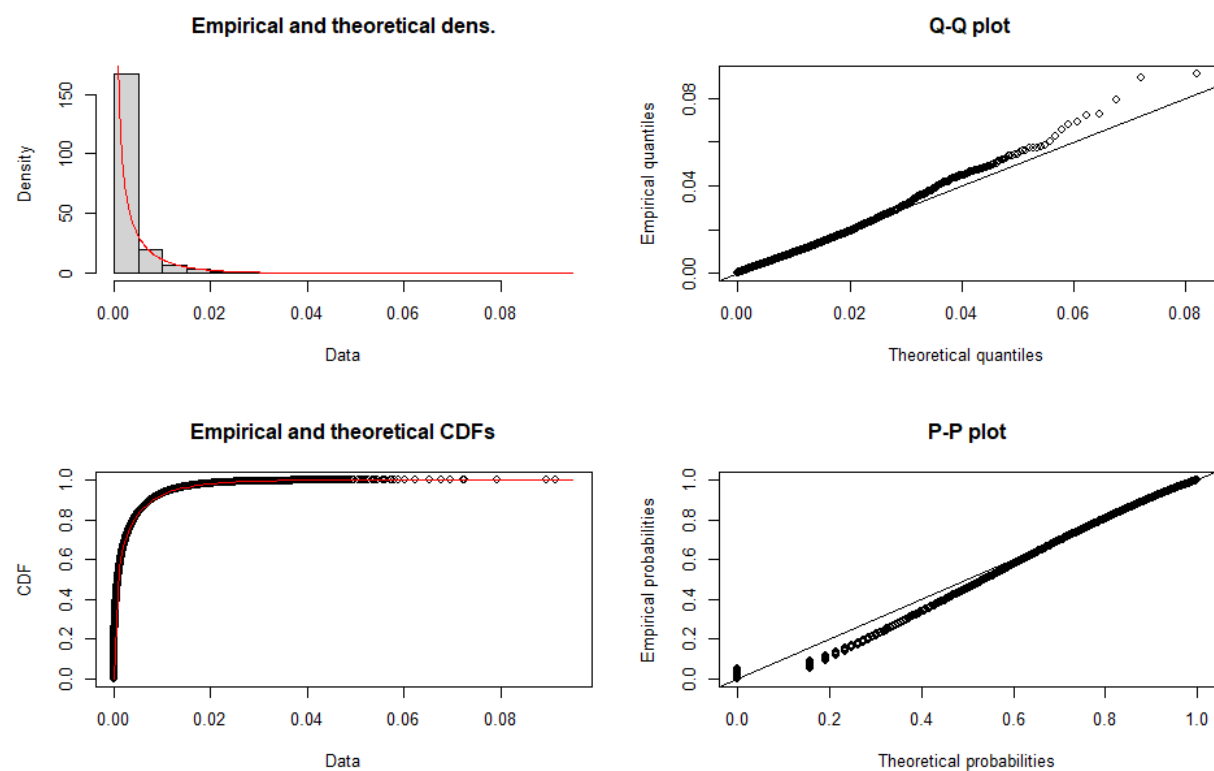

### ssGWAS\_NCSNP\_H0.50

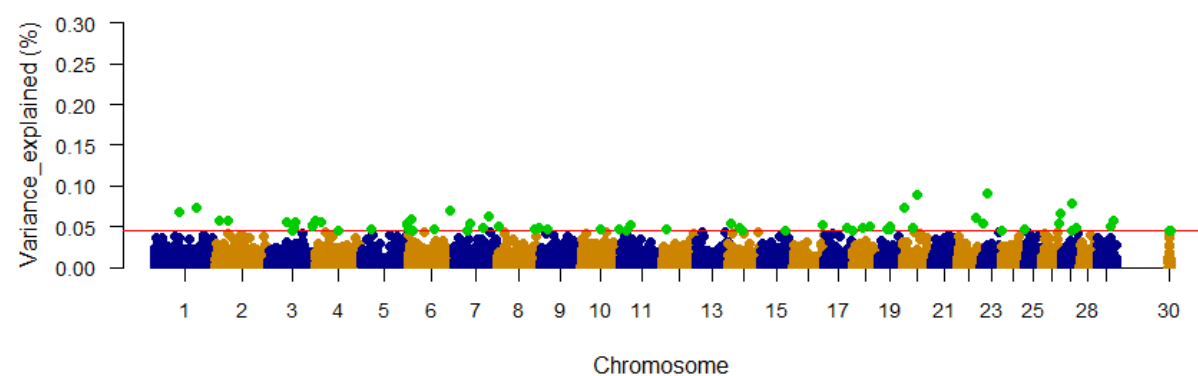

## Statistics: percentage variance explained by haplotypes and non-clustered SNPs from blocks with LD\_0.50

### WssGWAS iteration 2 (WssGWAS)

summary statistics

-----

min: 0 max: 0.0786

median: 0.00084

mean: 0.002766926

estimated sd: 0.004962761

estimated skewness: 3.939182

estimated kurtosis: 26.22129

**Cullen and Frey graph**

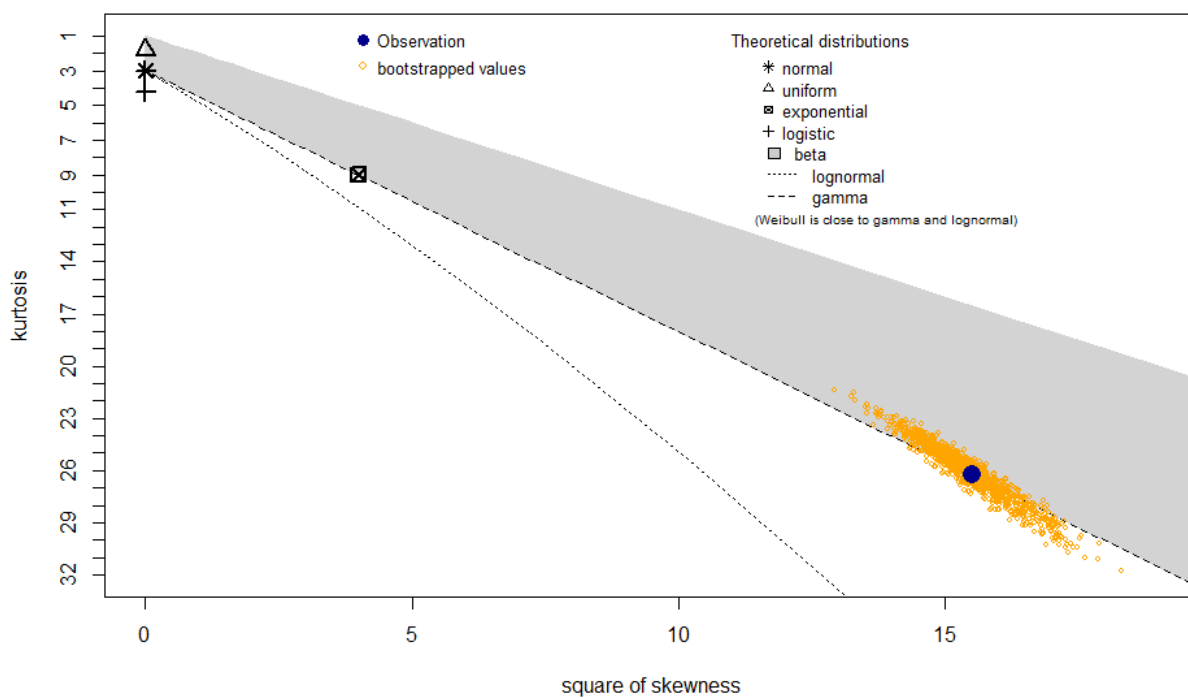

Fitting of the distribution ' gamma ' by matching moments

Parameters :

estimate

shape 0.3108569

rate 112.3473688

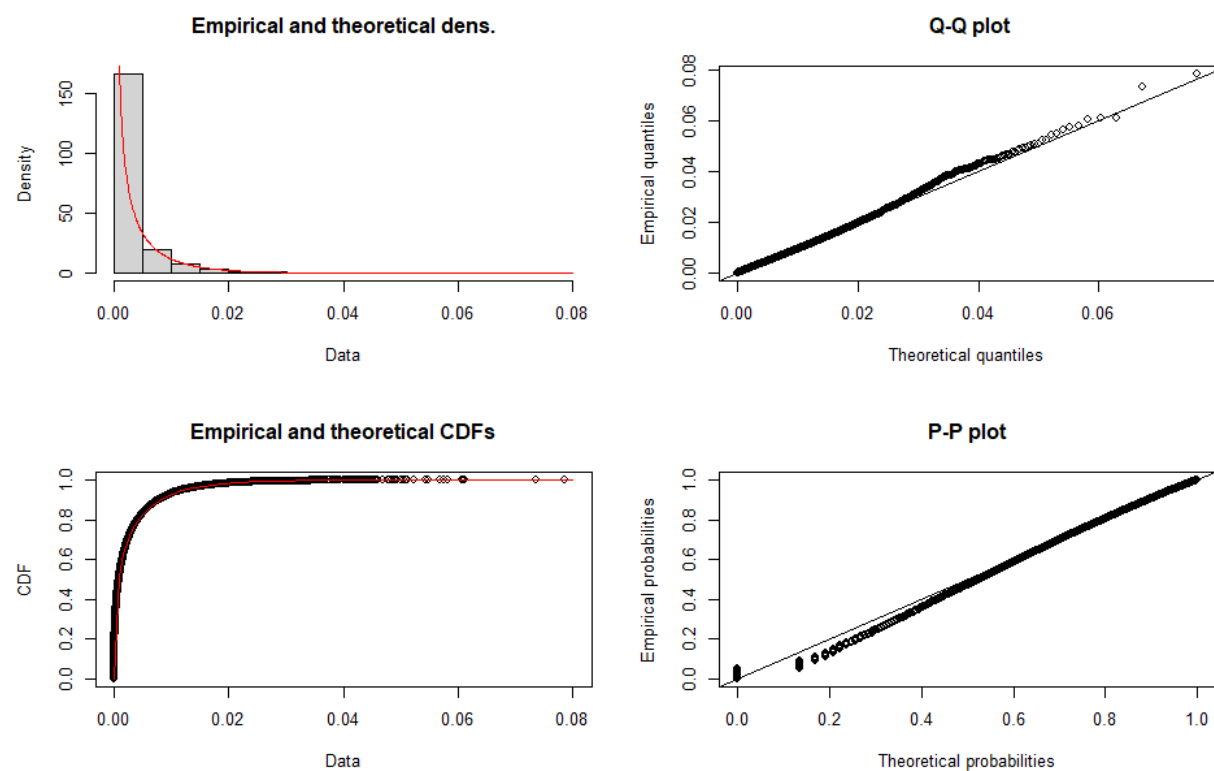

### WssGWAS\_2\_NCSNP\_H0.50

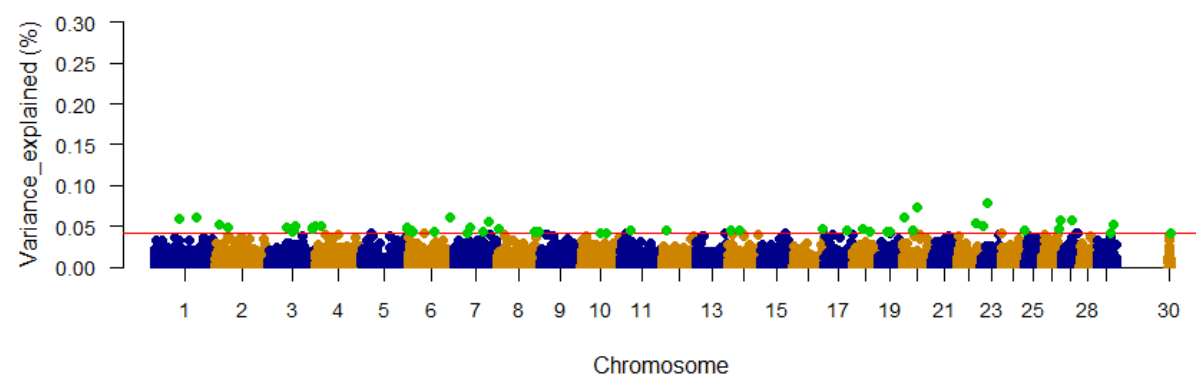

## Statistics: percentage variance explained by haplotypes and non-clustered SNPs from blocks with LD\_0.50

### WssGWAS iteration 3 (WssGWAS)

summary statistics

-----  
 min: 0 max: 0.08061  
 median: 0.00084  
 mean: 0.002766898  
 estimated sd: 0.004986442  
 estimated skewness: 4.002927  
 estimated kurtosis: 27.19834

Cullen and Frey graph

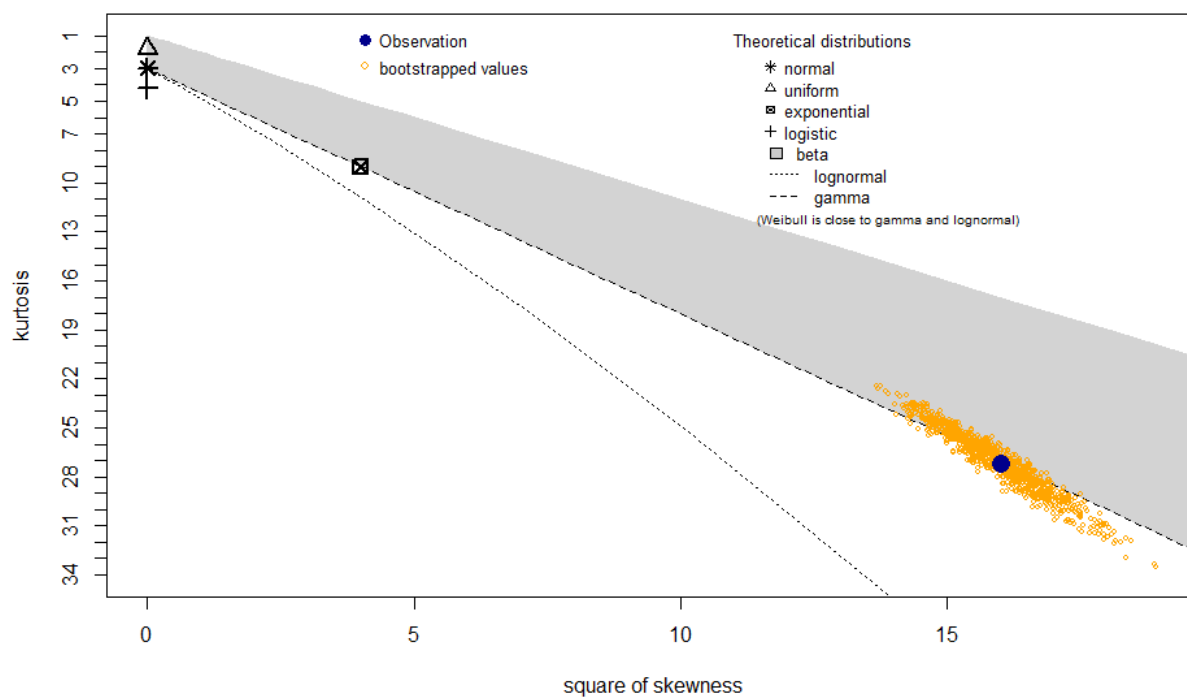

Fitting of the distribution 'gamma' by matching moments

Parameters :

estimate  
 shape 0.3079051  
 rate 111.2816717

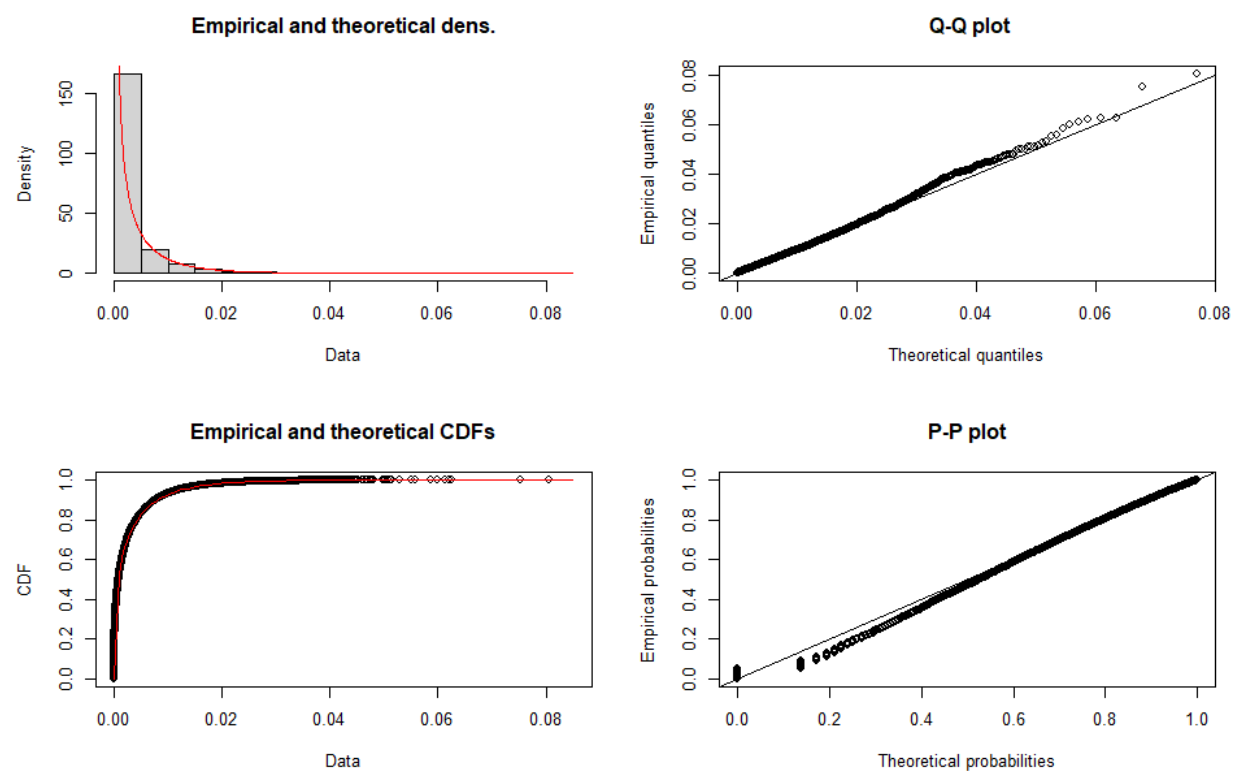

### WssGWAS\_3\_NCSNP\_H0.50

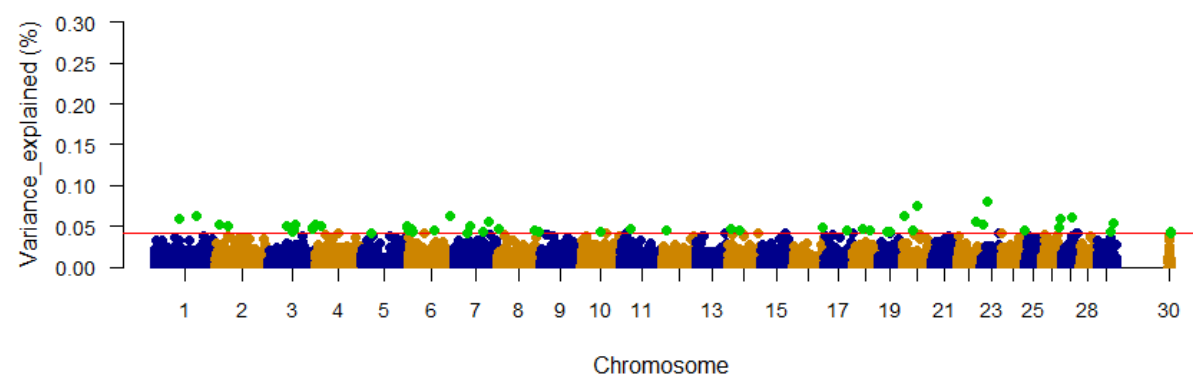

**Statistics: percentage variance explained by haplotypes and non-clustered SNPs from blocks with LD\_0.80**  
**WssGWAS iteration 1 (ssGWAS)**

## summary statistics

-----

min: 0 max: 0.08546

median: 0.00076

mean: 0.002527993

estimated sd: 0.004725019

estimated skewness: 4.697957

estimated kurtosis: 39.72729

## Cullen and Frey graph

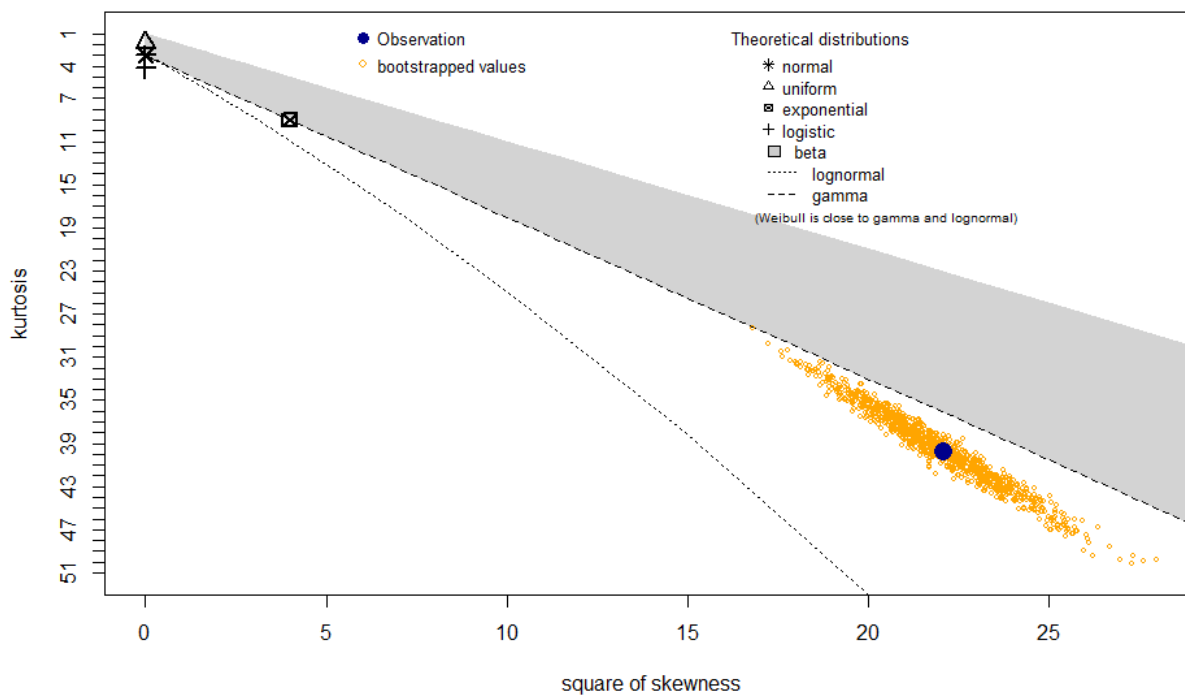

## Fitting of the distribution ' gamma ' by matching moments

Parameters :

estimate

shape 0.2862567

rate 113.2347650

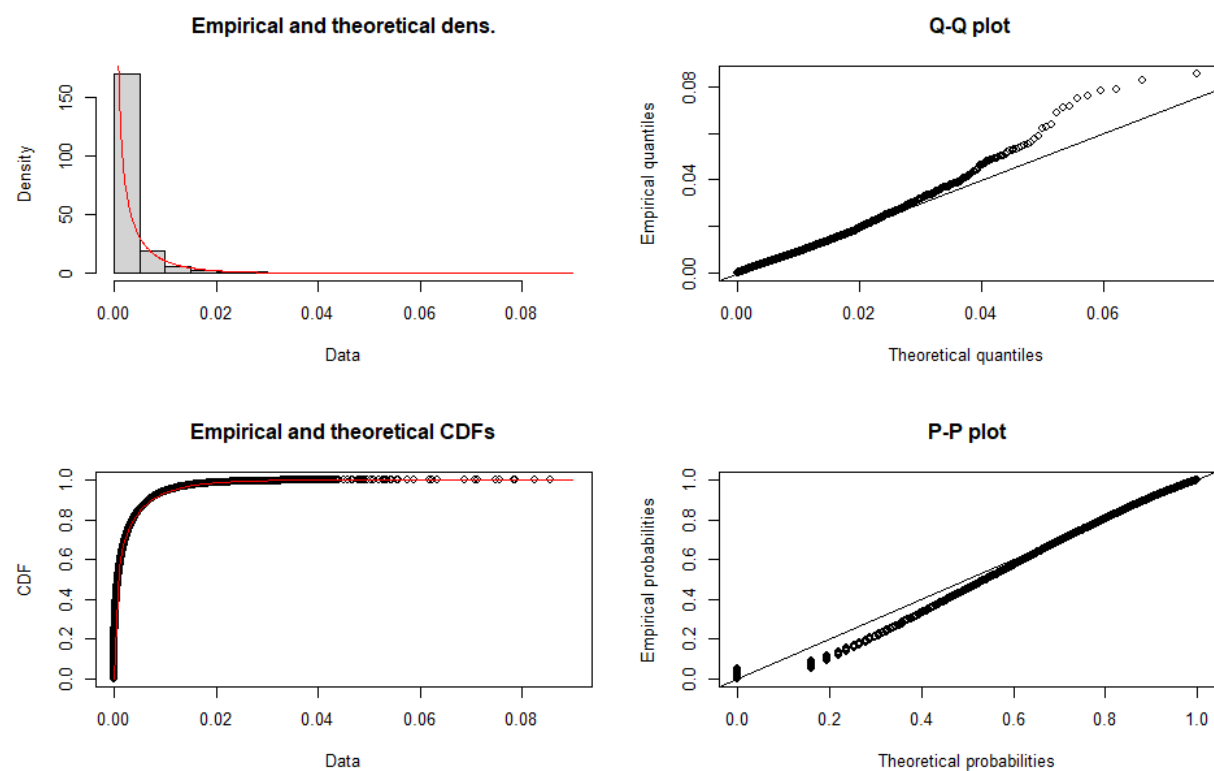

### ssGWAS\_NCSNP\_H0.80

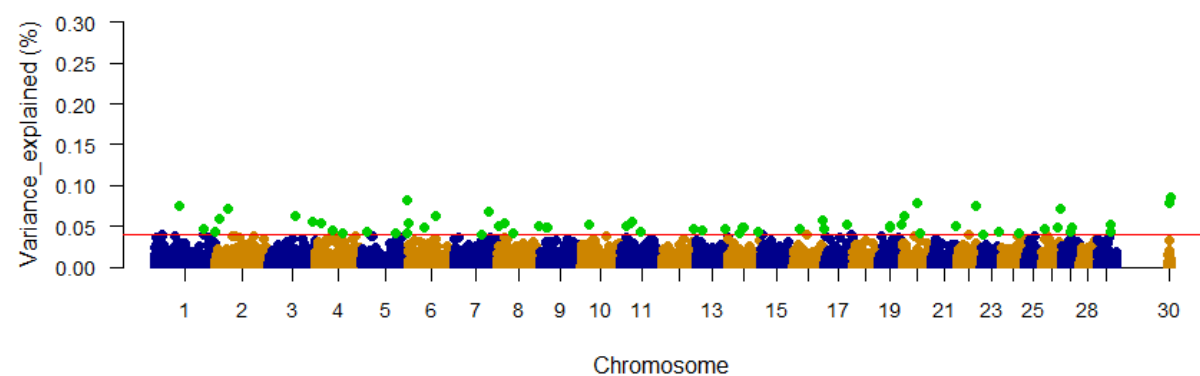



## Statistics: percentage variance explained by haplotypes and non-clustered SNPs from blocks with LD\_0.80

### WssGWAS iteration 2 (WssGWAS)

summary statistics

-----  
 min: 0 max: 0.07488  
 median: 8e-04  
 mean: 0.002527975  
 estimated sd: 0.00451904  
 estimated skewness: 4.172307  
 estimated kurtosis: 30.74078

**Cullen and Frey graph**

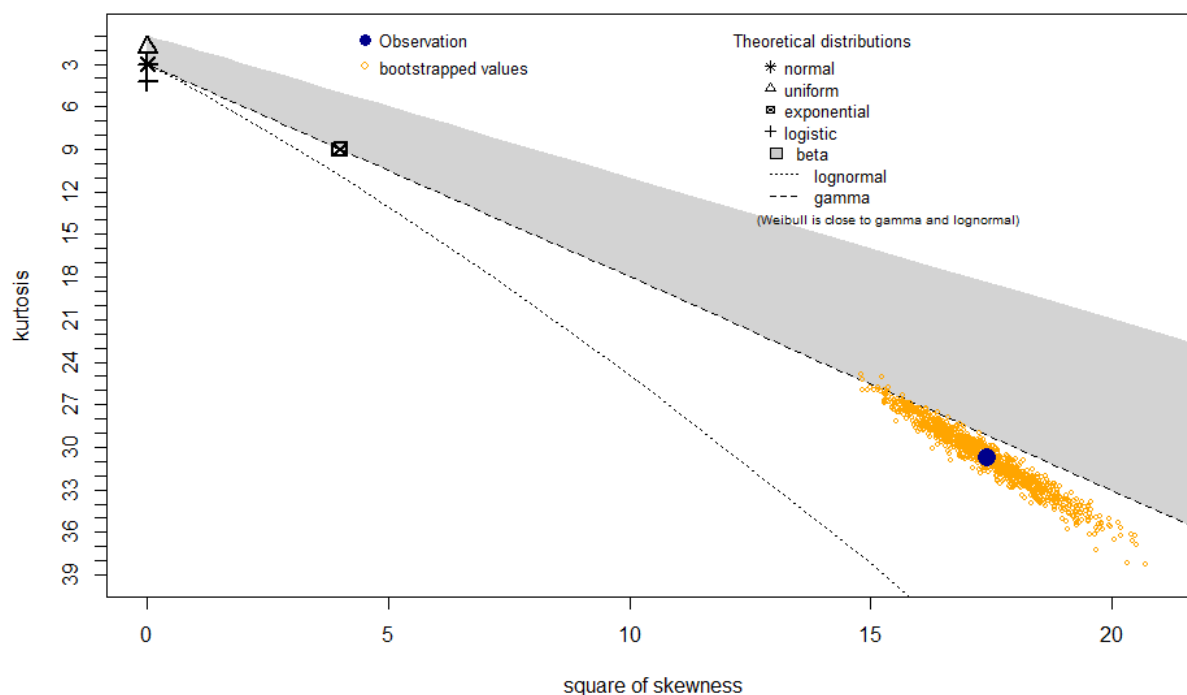

Fitting of the distribution ' gamma ' by matching moments

Parameters :

estimate  
 shape 0.3129423  
 rate 123.7916759

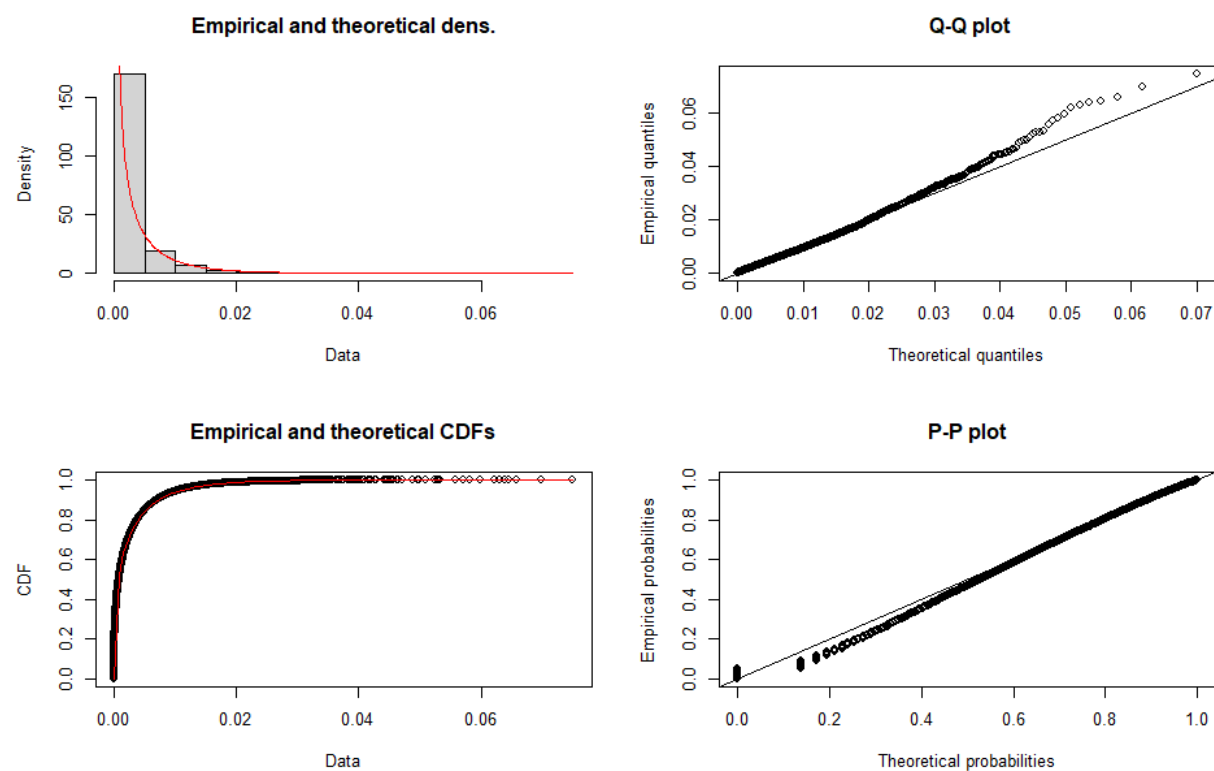

### WssGWAS\_2\_NCSNP\_H0.80

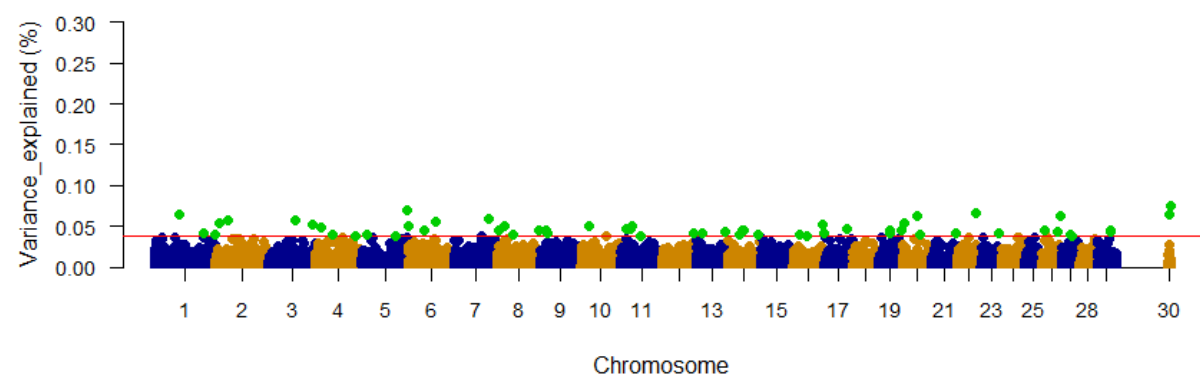

## Statistics: percentage variance explained by haplotypes and non-clustered SNPs from blocks with LD\_0.80

### WssGWAS iteration 3 (WssGWAS)

summary statistics

-----  
 min: 0 max: 0.07663  
 median: 0.00079  
 mean: 0.002527986  
 estimated sd: 0.004541451  
 estimated skewness: 4.247386  
 estimated kurtosis: 32.06017

**Cullen and Frey graph**

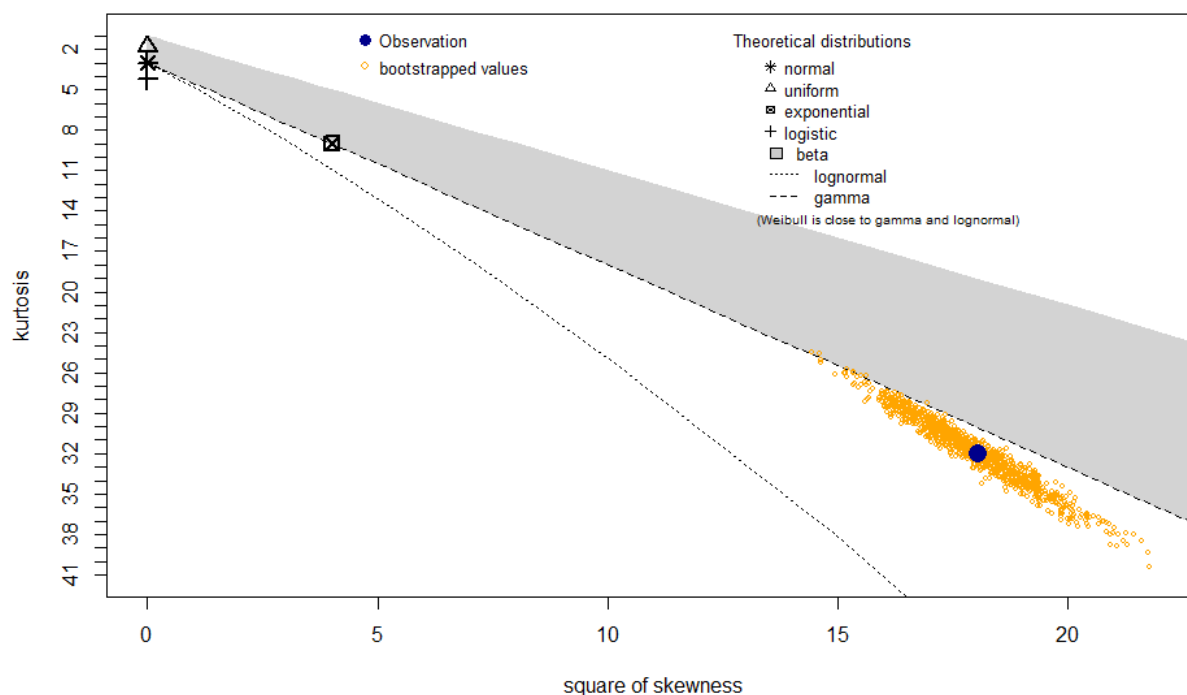

Fitting of the distribution ' gamma ' by matching moments

Parameters :

estimate  
 shape 0.3098641  
 rate 122.5734789

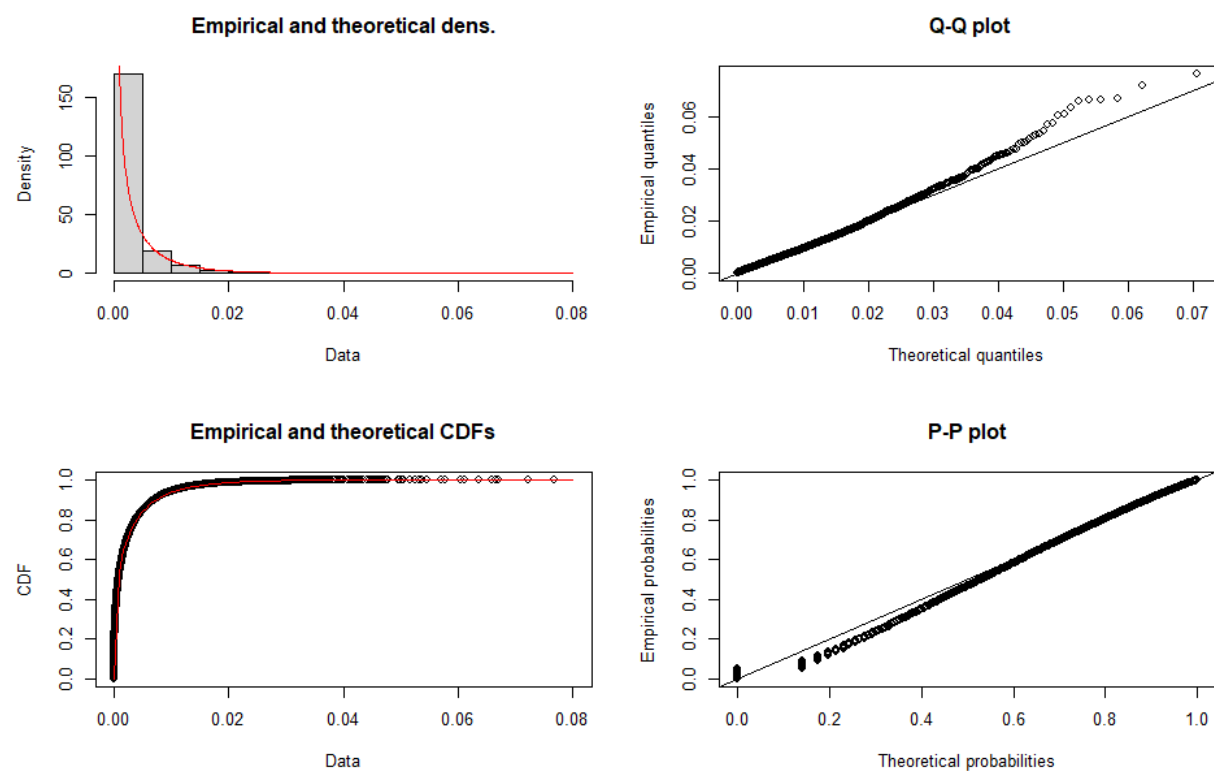

### WssGWAS\_3\_NCSNP\_H0.80

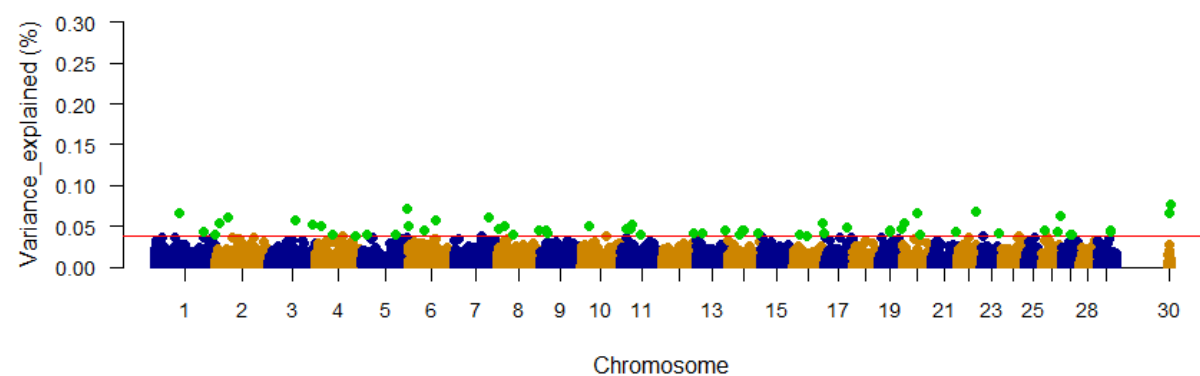

Supplement: s1 [file s1]
