# Supplementary material for: Haplotype-Based Single-Step GWAS for Yearling Temperament in American Angus Cattle
Source: MDPI journal article supplement (doi:10.3390/genes13010017), 2021-12-22
Supplement: s1 [file s1]

# Specific and overlapped QTL for ssGWAS\_H0.15 and ssGWAS\_NCSNP\_H0.15

\$`ssGWAS\_H0.15`

\$ssGWAS\_NCSNP\_H0.15

[1] "QTL\_ID=212443" "QTL\_ID=25762" "QTL\_ID=28109" "QTL\_ID=28112" "QTL\_ID=64006" "QTL\_ID=64007"  
 [7] "QTL\_ID=41728" "QTL\_ID=41731" "QTL\_ID=41732" "QTL\_ID=41737" "QTL\_ID=41738" "QTL\_ID=41739"  
 [13] "QTL\_ID=41741" "QTL\_ID=41742" "QTL\_ID=41743" "QTL\_ID=41729" "QTL\_ID=41733" "QTL\_ID=41735"  
 [19] "QTL\_ID=41736" "QTL\_ID=41726" "QTL\_ID=41730" "QTL\_ID=41734" "QTL\_ID=41740" "QTL\_ID=41727"  
 [25] "QTL\_ID=67176" "QTL\_ID=67177" "QTL\_ID=67178" "QTL\_ID=66530" "QTL\_ID=67607" "QTL\_ID=67608"  
 [31] "QTL\_ID=130701" "QTL\_ID=158090" "QTL\_ID=175015" "QTL\_ID=200165" "QTL\_ID=50404" "QTL\_ID=50406"  
 [37] "QTL\_ID=50407" "QTL\_ID=50409" "QTL\_ID=50413" "QTL\_ID=50414" "QTL\_ID=50415" "QTL\_ID=50416"  
 [43] "QTL\_ID=50417" "QTL\_ID=50412" "QTL\_ID=164127" "QTL\_ID=164206" "QTL\_ID=164416" "QTL\_ID=164436"  
 [49] "QTL\_ID=164476" "QTL\_ID=164535" "QTL\_ID=176528" "QTL\_ID=186241" "QTL\_ID=190174" "QTL\_ID=50405"  
 [55] "QTL\_ID=50408" "QTL\_ID=50410" "QTL\_ID=66693" "QTL\_ID=50403" "QTL\_ID=50411" "QTL\_ID=157031"  
 [61] "QTL\_ID=157030" "QTL\_ID=14785" "QTL\_ID=196414" "QTL\_ID=196415" "QTL\_ID=196416" "QTL\_ID=32552"  
 [67] "QTL\_ID=32611" "QTL\_ID=62834" "QTL\_ID=199984" "QTL\_ID=199985" "QTL\_ID=199982" "QTL\_ID=199983"  
 [73] "QTL\_ID=199980" "QTL\_ID=199981" "QTL\_ID=197373" "QTL\_ID=197374" "QTL\_ID=202582" "QTL\_ID=208787"  
 [79] "QTL\_ID=205130" "QTL\_ID=211354" "QTL\_ID=201804" "QTL\_ID=207725" "QTL\_ID=202223" "QTL\_ID=208286"  
 [85] "QTL\_ID=204991" "QTL\_ID=211233" "QTL\_ID=196073" "QTL\_ID=113783" "QTL\_ID=116938" "QTL\_ID=131376"  
 [91] "QTL\_ID=131377" "QTL\_ID=131378"

\$`ssGWAS\_H0.15:ssGWAS\_NCSNP\_H0.15`

[1] "QTL\_ID=39799" "QTL\_ID=39795" "QTL\_ID=39796" "QTL\_ID=39798" "QTL\_ID=105587" "QTL\_ID=39797"  
 [7] "QTL\_ID=5321" "QTL\_ID=39794" "QTL\_ID=39800" "QTL\_ID=26726" "QTL\_ID=43369" "QTL\_ID=43370"  
 [13] "QTL\_ID=43372" "QTL\_ID=43373" "QTL\_ID=43374" "QTL\_ID=43375" "QTL\_ID=43376" "QTL\_ID=43378"  
 [19] "QTL\_ID=43379" "QTL\_ID=43380" "QTL\_ID=43381" "QTL\_ID=43383" "QTL\_ID=43384" "QTL\_ID=43386"  
 [25] "QTL\_ID=43387" "QTL\_ID=43388" "QTL\_ID=43389" "QTL\_ID=43390" "QTL\_ID=43392" "QTL\_ID=43393"  
 [31] "QTL\_ID=43394" "QTL\_ID=43395" "QTL\_ID=43368" "QTL\_ID=43371" "QTL\_ID=43377" "QTL\_ID=43382"  
 [37] "QTL\_ID=43385" "QTL\_ID=43391" "QTL\_ID=49435" "QTL\_ID=49436" "QTL\_ID=49439" "QTL\_ID=49445"  
 [43] "QTL\_ID=49446" "QTL\_ID=49449" "QTL\_ID=49450" "QTL\_ID=49437" "QTL\_ID=49440" "QTL\_ID=49443"  
 [49] "QTL\_ID=49444" "QTL\_ID=49438" "QTL\_ID=49441" "QTL\_ID=49442" "QTL\_ID=106866" "QTL\_ID=49434"  
 [55] "QTL\_ID=49447" "QTL\_ID=49448" "QTL\_ID=65985" "QTL\_ID=198366" "QTL\_ID=196694" "QTL\_ID=201952"  
 [61] "QTL\_ID=197280" "QTL\_ID=202502" "QTL\_ID=198163" "QTL\_ID=203349" "QTL\_ID=199795" "QTL\_ID=204890"  
 [67] "QTL\_ID=62078"

# Specific and overlapped QTL for ssGWAS\_H0.50 and ssGWAS\_NCSNP\_H0.50

\$`ssGWAS\_H0.50`

\$ssGWAS\_NCSNP\_H0.50

[1] "QTL\_ID=32557" "QTL\_ID=2443" "QTL\_ID=66997" "QTL\_ID=64006" "QTL\_ID=64007" "QTL\_ID=24712"  
 [7] "QTL\_ID=24781" "QTL\_ID=160062" "QTL\_ID=32345" "QTL\_ID=41728" "QTL\_ID=41731" "QTL\_ID=41732"  
 [13] "QTL\_ID=41737" "QTL\_ID=41738" "QTL\_ID=41739" "QTL\_ID=41741" "QTL\_ID=41742" "QTL\_ID=41743"  
 [19] "QTL\_ID=41729" "QTL\_ID=41733" "QTL\_ID=41735" "QTL\_ID=41736" "QTL\_ID=41726" "QTL\_ID=41730"  
 [25] "QTL\_ID=41734" "QTL\_ID=41740" "QTL\_ID=41727" "QTL\_ID=167101" "QTL\_ID=67657" "QTL\_ID=37348"  
 [31] "QTL\_ID=37364" "QTL\_ID=37349" "QTL\_ID=37365" "QTL\_ID=119123" "QTL\_ID=157531" "QTL\_ID=106980"  
 [37] "QTL\_ID=107136" "QTL\_ID=158047" "QTL\_ID=174291" "QTL\_ID=174292" "QTL\_ID=68759" "QTL\_ID=49619"  
 [43] "QTL\_ID=49627" "QTL\_ID=49625" "QTL\_ID=193757" "QTL\_ID=49622" "QTL\_ID=49623" "QTL\_ID=49618"  
 [49] "QTL\_ID=49620" "QTL\_ID=49621" "QTL\_ID=49624" "QTL\_ID=49626" "QTL\_ID=15493" "QTL\_ID=15494"  
 [55] "QTL\_ID=50404" "QTL\_ID=50406" "QTL\_ID=50407" "QTL\_ID=50409" "QTL\_ID=50413" "QTL\_ID=50414"  
 [61] "QTL\_ID=50415" "QTL\_ID=50416" "QTL\_ID=50417" "QTL\_ID=50412" "QTL\_ID=164127" "QTL\_ID=164206"  
 [67] "QTL\_ID=164416" "QTL\_ID=164436" "QTL\_ID=164476" "QTL\_ID=164535" "QTL\_ID=176528" "QTL\_ID=186241"  
 [73] "QTL\_ID=190174" "QTL\_ID=50405" "QTL\_ID=50408" "QTL\_ID=50410" "QTL\_ID=66693" "QTL\_ID=50403"  
 [79] "QTL\_ID=50411" "QTL\_ID=157031" "QTL\_ID=157030" "QTL\_ID=14785" "QTL\_ID=65985" "QTL\_ID=28176"  
 [85] "QTL\_ID=52253" "QTL\_ID=52255" "QTL\_ID=52259" "QTL\_ID=32336" "QTL\_ID=52258" "QTL\_ID=52256"  
 [91] "QTL\_ID=52257" "QTL\_ID=52254" "QTL\_ID=52260" "QTL\_ID=52261" "QTL\_ID=113783" "QTL\_ID=116938"  
 [97] "QTL\_ID=62078" "QTL\_ID=148239" "QTL\_ID=148375" "QTL\_ID=35479" "QTL\_ID=35948" "QTL\_ID=35698"  
 [103] "QTL\_ID=35967" "QTL\_ID=143428" "QTL\_ID=143467" "QTL\_ID=143466" "QTL\_ID=143487" "QTL\_ID=143497"  
 [109] "QTL\_ID=143499" "QTL\_ID=143522" "QTL\_ID=143525" "QTL\_ID=143526" "QTL\_ID=143528" "QTL\_ID=126011"

\$`ssGWAS\_H0.50:ssGWAS\_NCSNP\_H0.50`

[1] "QTL\_ID=21147" "QTL\_ID=29831" "QTL\_ID=29833" "QTL\_ID=164356" "QTL\_ID=43369" "QTL\_ID=43370"  
 [7] "QTL\_ID=43372" "QTL\_ID=43373" "QTL\_ID=43374" "QTL\_ID=43375" "QTL\_ID=43376" "QTL\_ID=43378"  
 [13] "QTL\_ID=43379" "QTL\_ID=43380" "QTL\_ID=43381" "QTL\_ID=43383" "QTL\_ID=43384" "QTL\_ID=43386"  
 [19] "QTL\_ID=43387" "QTL\_ID=43388" "QTL\_ID=43389" "QTL\_ID=43390" "QTL\_ID=43392" "QTL\_ID=43393"  
 [25] "QTL\_ID=43394" "QTL\_ID=43395" "QTL\_ID=43368" "QTL\_ID=43371" "QTL\_ID=43377" "QTL\_ID=43382"  
 [31] "QTL\_ID=43385" "QTL\_ID=43391" "QTL\_ID=65486" "QTL\_ID=27090" "QTL\_ID=33590" "QTL\_ID=33591"  
 [37] "QTL\_ID=33592" "QTL\_ID=33593" "QTL\_ID=200486" "QTL\_ID=205641" "QTL\_ID=205642" "QTL\_ID=205643"  
 [43] "QTL\_ID=205644" "QTL\_ID=205645" "QTL\_ID=33759" "QTL\_ID=23204" "QTL\_ID=14991" "QTL\_ID=161733"  
 [49] "QTL\_ID=173725" "QTL\_ID=25571" "QTL\_ID=25985" "QTL\_ID=26607" "QTL\_ID=35367" "QTL\_ID=35573"  
 [55] "QTL\_ID=24605"

### Specific and overlapped QTL for ssGWAS\_H0.80 and ssGWAS\_NCSNP\_H0.80

\$ssGWAS\_H0.80

[1] "QTL\_ID=113783" "QTL\_ID=116938"

\$ssGWAS\_NCSNP\_H0.80

[1] "QTL\_ID=21147" "QTL\_ID=29831" "QTL\_ID=29833" "QTL\_ID=32557" "QTL\_ID=64006" "QTL\_ID=64007"  
 [7] "QTL\_ID=125442" "QTL\_ID=41728" "QTL\_ID=41731" "QTL\_ID=41732" "QTL\_ID=41737" "QTL\_ID=41738"  
 [13] "QTL\_ID=41739" "QTL\_ID=41741" "QTL\_ID=41742" "QTL\_ID=41743" "QTL\_ID=41729" "QTL\_ID=41733"  
 [19] "QTL\_ID=41735" "QTL\_ID=41736" "QTL\_ID=41726" "QTL\_ID=41730" "QTL\_ID=41734" "QTL\_ID=41740"  
 [25] "QTL\_ID=41727" "QTL\_ID=177018" "QTL\_ID=42094" "QTL\_ID=42095" "QTL\_ID=42098" "QTL\_ID=42099"  
 [31] "QTL\_ID=42105" "QTL\_ID=42106" "QTL\_ID=42110" "QTL\_ID=42111" "QTL\_ID=42112" "QTL\_ID=42115"  
 [37] "QTL\_ID=42116" "QTL\_ID=42119" "QTL\_ID=42120" "QTL\_ID=42126" "QTL\_ID=42127" "QTL\_ID=42131"

[43] "QTL\_ID=42132" "QTL\_ID=42133" "QTL\_ID=42096" "QTL\_ID=42100" "QTL\_ID=42103" "QTL\_ID=42104"  
 [49] "QTL\_ID=42117" "QTL\_ID=42121" "QTL\_ID=42124" "QTL\_ID=42125" "QTL\_ID=42092" "QTL\_ID=42097"  
 [55] "QTL\_ID=42101" "QTL\_ID=42102" "QTL\_ID=42107" "QTL\_ID=42113" "QTL\_ID=42118" "QTL\_ID=42122"  
 [61] "QTL\_ID=42123" "QTL\_ID=42128" "QTL\_ID=181936" "QTL\_ID=182379" "QTL\_ID=184562" "QTL\_ID=185307"  
 [67] "QTL\_ID=185502" "QTL\_ID=185746" "QTL\_ID=185966" "QTL\_ID=187366" "QTL\_ID=187474" "QTL\_ID=188492"  
 [73] "QTL\_ID=188805" "QTL\_ID=189289" "QTL\_ID=189510" "QTL\_ID=189637" "QTL\_ID=42093" "QTL\_ID=42108"  
 [79] "QTL\_ID=42109" "QTL\_ID=42114" "QTL\_ID=42129" "QTL\_ID=42130" "QTL\_ID=212624" "QTL\_ID=178966"  
 [85] "QTL\_ID=68117" "QTL\_ID=68118" "QTL\_ID=106980" "QTL\_ID=107136" "QTL\_ID=68310" "QTL\_ID=135799"  
 [91] "QTL\_ID=68559" "QTL\_ID=176799" "QTL\_ID=177143" "QTL\_ID=158047" "QTL\_ID=158090" "QTL\_ID=175015"  
 [97] "QTL\_ID=15493" "QTL\_ID=15494" "QTL\_ID=50404" "QTL\_ID=50406" "QTL\_ID=50407" "QTL\_ID=50409"  
 [103] "QTL\_ID=50413" "QTL\_ID=50414" "QTL\_ID=50415" "QTL\_ID=50416" "QTL\_ID=50417" "QTL\_ID=50412"  
 [109] "QTL\_ID=164127" "QTL\_ID=164206" "QTL\_ID=164416" "QTL\_ID=164436" "QTL\_ID=164476" "QTL\_ID=164535"  
 [115] "QTL\_ID=176528" "QTL\_ID=186241" "QTL\_ID=190174" "QTL\_ID=50405" "QTL\_ID=50408" "QTL\_ID=50410"  
 [121] "QTL\_ID=66693" "QTL\_ID=50403" "QTL\_ID=50411" "QTL\_ID=165364" "QTL\_ID=157031" "QTL\_ID=157030"  
 [127] "QTL\_ID=14785" "QTL\_ID=107642" "QTL\_ID=35479" "QTL\_ID=35948"

\$`ssGWAS\_H0.80:ssGWAS\_NCSNP\_H0.80`

[1] "QTL\_ID=43369" "QTL\_ID=43370" "QTL\_ID=43372" "QTL\_ID=43373" "QTL\_ID=43374" "QTL\_ID=43375"  
 "QTL\_ID=43376"  
 [8] "QTL\_ID=43378" "QTL\_ID=43379" "QTL\_ID=43380" "QTL\_ID=43381" "QTL\_ID=43383" "QTL\_ID=43384"  
 "QTL\_ID=43386"  
 [15] "QTL\_ID=43387" "QTL\_ID=43388" "QTL\_ID=43389" "QTL\_ID=43390" "QTL\_ID=43392" "QTL\_ID=43393"  
 "QTL\_ID=43394"  
 [22] "QTL\_ID=43395" "QTL\_ID=43368" "QTL\_ID=43371" "QTL\_ID=43377" "QTL\_ID=43382" "QTL\_ID=43385"  
 "QTL\_ID=43391"

**Specific and overlapped QTL considering all ssGWAS using haplotypes only  
 (ssGWAS\_H0.15, ssGWAS\_H0.50, and ssGWAS\_H0.80)**

\$ssGWAS\_H0.15

[1] "QTL\_ID=39799" "QTL\_ID=39795" "QTL\_ID=39796" "QTL\_ID=39798" "QTL\_ID=105587" "QTL\_ID=39797"  
 [7] "QTL\_ID=5321" "QTL\_ID=39794" "QTL\_ID=39800" "QTL\_ID=26726" "QTL\_ID=49435" "QTL\_ID=49436"  
 [13] "QTL\_ID=49439" "QTL\_ID=49445" "QTL\_ID=49446" "QTL\_ID=49449" "QTL\_ID=49450" "QTL\_ID=49437"  
 [19] "QTL\_ID=49440" "QTL\_ID=49443" "QTL\_ID=49444" "QTL\_ID=49438" "QTL\_ID=49441" "QTL\_ID=49442"  
 [25] "QTL\_ID=106866" "QTL\_ID=49434" "QTL\_ID=49447" "QTL\_ID=49448" "QTL\_ID=65985" "QTL\_ID=198366"  
 [31] "QTL\_ID=196694" "QTL\_ID=201952" "QTL\_ID=197280" "QTL\_ID=202502" "QTL\_ID=198163" "QTL\_ID=203349"  
 [37] "QTL\_ID=199795" "QTL\_ID=204890" "QTL\_ID=62078"

\$ssGWAS\_H0.50

[1] "QTL\_ID=21147" "QTL\_ID=29831" "QTL\_ID=29833" "QTL\_ID=164356" "QTL\_ID=65486" "QTL\_ID=27090"  
 [7] "QTL\_ID=33590" "QTL\_ID=33591" "QTL\_ID=33592" "QTL\_ID=33593" "QTL\_ID=200486" "QTL\_ID=205641"  
 [13] "QTL\_ID=205642" "QTL\_ID=205643" "QTL\_ID=205644" "QTL\_ID=205645" "QTL\_ID=33759" "QTL\_ID=23204"  
 [19] "QTL\_ID=14991" "QTL\_ID=161733" "QTL\_ID=173725" "QTL\_ID=25571" "QTL\_ID=25985" "QTL\_ID=26607"  
 [25] "QTL\_ID=35367" "QTL\_ID=35573" "QTL\_ID=24605"

\$ssGWAS\_H0.80

[1] "QTL\_ID=113783" "QTL\_ID=116938"

\$`ssGWAS\_H0.15:ssGWAS\_H0.50`

\$`ssGWAS\_H0.15:ssGWAS\_H0.80`

\$`ssGWAS\_H0.50:ssGWAS\_H0.80`

\$`ssGWAS\_H0.15:ssGWAS\_H0.50:ssGWAS\_H0.80`

[1] "QTL\_ID=43369" "QTL\_ID=43370" "QTL\_ID=43372" "QTL\_ID=43373" "QTL\_ID=43374" "QTL\_ID=43375"  
"QTL\_ID=43376"

[8] "QTL\_ID=43378" "QTL\_ID=43379" "QTL\_ID=43380" "QTL\_ID=43381" "QTL\_ID=43383" "QTL\_ID=43384"  
"QTL\_ID=43386"

[15] "QTL\_ID=43387" "QTL\_ID=43388" "QTL\_ID=43389" "QTL\_ID=43390" "QTL\_ID=43392" "QTL\_ID=43393"  
"QTL\_ID=43394"

[22] "QTL\_ID=43395" "QTL\_ID=43368" "QTL\_ID=43371" "QTL\_ID=43377" "QTL\_ID=43382" "QTL\_ID=43385"  
"QTL\_ID=43391"

**Specific and overlapped QTL considering all ssGWAS using non-clustered SNPs and haplotypes  
(ssGWAS\_NCSNP\_H0.15, ssGWAS\_NCSNP\_H0.50, and ssGWAS\_NCSNP\_H0.80)**

\$ssGWAS\_NCSNP\_H0.15

[1] "QTL\_ID=212443" "QTL\_ID=25762" "QTL\_ID=28109" "QTL\_ID=28112" "QTL\_ID=39799" "QTL\_ID=39795"  
[7] "QTL\_ID=39796" "QTL\_ID=39798" "QTL\_ID=105587" "QTL\_ID=39797" "QTL\_ID=5321" "QTL\_ID=39794"  
[13] "QTL\_ID=39800" "QTL\_ID=26726" "QTL\_ID=67176" "QTL\_ID=67177" "QTL\_ID=67178" "QTL\_ID=66530"  
[19] "QTL\_ID=67607" "QTL\_ID=67608" "QTL\_ID=130701" "QTL\_ID=49435" "QTL\_ID=49436" "QTL\_ID=49439"  
[25] "QTL\_ID=49445" "QTL\_ID=49446" "QTL\_ID=49449" "QTL\_ID=49450" "QTL\_ID=49437" "QTL\_ID=49440"  
[31] "QTL\_ID=49443" "QTL\_ID=49444" "QTL\_ID=49438" "QTL\_ID=49441" "QTL\_ID=49442" "QTL\_ID=106866"  
[37] "QTL\_ID=49434" "QTL\_ID=49447" "QTL\_ID=49448" "QTL\_ID=200165" "QTL\_ID=196414" "QTL\_ID=196415"  
[43] "QTL\_ID=196416" "QTL\_ID=32552" "QTL\_ID=32611" "QTL\_ID=62834" "QTL\_ID=199984" "QTL\_ID=199985"  
[49] "QTL\_ID=199982" "QTL\_ID=199983" "QTL\_ID=199980" "QTL\_ID=199981" "QTL\_ID=197373" "QTL\_ID=197374"  
[55] "QTL\_ID=202582" "QTL\_ID=208787" "QTL\_ID=205130" "QTL\_ID=211354" "QTL\_ID=201804" "QTL\_ID=207725"  
[61] "QTL\_ID=202223" "QTL\_ID=208286" "QTL\_ID=204991" "QTL\_ID=211233" "QTL\_ID=196073" "QTL\_ID=198366"  
[67] "QTL\_ID=196694" "QTL\_ID=201952" "QTL\_ID=197280" "QTL\_ID=202502" "QTL\_ID=198163" "QTL\_ID=203349"  
[73] "QTL\_ID=199795" "QTL\_ID=204890" "QTL\_ID=131376" "QTL\_ID=131377" "QTL\_ID=131378"

\$ssGWAS\_NCSNP\_H0.50

[1] "QTL\_ID=164356" "QTL\_ID=2443" "QTL\_ID=66997" "QTL\_ID=24712" "QTL\_ID=24781" "QTL\_ID=160062"  
[7] "QTL\_ID=32345" "QTL\_ID=167101" "QTL\_ID=67657" "QTL\_ID=37348" "QTL\_ID=37364" "QTL\_ID=37349"  
[13] "QTL\_ID=37365" "QTL\_ID=119123" "QTL\_ID=157531" "QTL\_ID=65486" "QTL\_ID=27090" "QTL\_ID=33590"  
[19] "QTL\_ID=33591" "QTL\_ID=33592" "QTL\_ID=33593" "QTL\_ID=200486" "QTL\_ID=205641" "QTL\_ID=205642"  
[25] "QTL\_ID=205643" "QTL\_ID=205644" "QTL\_ID=205645" "QTL\_ID=33759" "QTL\_ID=23204" "QTL\_ID=14991"  
[31] "QTL\_ID=161733" "QTL\_ID=173725" "QTL\_ID=25571" "QTL\_ID=25985" "QTL\_ID=26607" "QTL\_ID=35367"

[37] "QTL\_ID=35573" "QTL\_ID=24605" "QTL\_ID=174291" "QTL\_ID=174292" "QTL\_ID=68759" "QTL\_ID=49619"  
[43] "QTL\_ID=49627" "QTL\_ID=49625" "QTL\_ID=193757" "QTL\_ID=49622" "QTL\_ID=49623" "QTL\_ID=49618"  
[49] "QTL\_ID=49620" "QTL\_ID=49621" "QTL\_ID=49624" "QTL\_ID=49626" "QTL\_ID=28176" "QTL\_ID=52253"  
[55] "QTL\_ID=52255" "QTL\_ID=52259" "QTL\_ID=32336" "QTL\_ID=52258" "QTL\_ID=52256" "QTL\_ID=52257"  
[61] "QTL\_ID=52254" "QTL\_ID=52260" "QTL\_ID=52261" "QTL\_ID=148239" "QTL\_ID=148375" "QTL\_ID=35698"  
[67] "QTL\_ID=35967" "QTL\_ID=143428" "QTL\_ID=143467" "QTL\_ID=143466" "QTL\_ID=143487" "QTL\_ID=143497"  
[73] "QTL\_ID=143499" "QTL\_ID=143522" "QTL\_ID=143525" "QTL\_ID=143526" "QTL\_ID=143528" "QTL\_ID=126011"

#### \$ssGWAS\_NCSNP\_H0.80

[1] "QTL\_ID=125442" "QTL\_ID=177018" "QTL\_ID=42094" "QTL\_ID=42095" "QTL\_ID=42098" "QTL\_ID=42099"  
[7] "QTL\_ID=42105" "QTL\_ID=42106" "QTL\_ID=42110" "QTL\_ID=42111" "QTL\_ID=42112" "QTL\_ID=42115"  
[13] "QTL\_ID=42116" "QTL\_ID=42119" "QTL\_ID=42120" "QTL\_ID=42126" "QTL\_ID=42127" "QTL\_ID=42131"  
[19] "QTL\_ID=42132" "QTL\_ID=42133" "QTL\_ID=42096" "QTL\_ID=42100" "QTL\_ID=42103" "QTL\_ID=42104"  
[25] "QTL\_ID=42117" "QTL\_ID=42121" "QTL\_ID=42124" "QTL\_ID=42125" "QTL\_ID=42092" "QTL\_ID=42097"  
[31] "QTL\_ID=42101" "QTL\_ID=42102" "QTL\_ID=42107" "QTL\_ID=42113" "QTL\_ID=42118" "QTL\_ID=42122"  
[37] "QTL\_ID=42123" "QTL\_ID=42128" "QTL\_ID=181936" "QTL\_ID=182379" "QTL\_ID=184562" "QTL\_ID=185307"  
[43] "QTL\_ID=185502" "QTL\_ID=185746" "QTL\_ID=185966" "QTL\_ID=187366" "QTL\_ID=187474" "QTL\_ID=188492"  
[49] "QTL\_ID=188805" "QTL\_ID=189289" "QTL\_ID=189510" "QTL\_ID=189637" "QTL\_ID=42093" "QTL\_ID=42108"  
[55] "QTL\_ID=42109" "QTL\_ID=42114" "QTL\_ID=42129" "QTL\_ID=42130" "QTL\_ID=212624" "QTL\_ID=178966"  
[61] "QTL\_ID=68117" "QTL\_ID=68118" "QTL\_ID=68310" "QTL\_ID=135799" "QTL\_ID=68559" "QTL\_ID=176799"  
[67] "QTL\_ID=177143" "QTL\_ID=165364" "QTL\_ID=107642"

#### \$`ssGWAS\_NCSNP\_H0.15:ssGWAS\_NCSNP\_H0.50`

[1] "QTL\_ID=65985" "QTL\_ID=113783" "QTL\_ID=116938" "QTL\_ID=62078"

#### \$`ssGWAS\_NCSNP\_H0.15:ssGWAS\_NCSNP\_H0.80`

[1] "QTL\_ID=158090" "QTL\_ID=175015"

#### \$`ssGWAS\_NCSNP\_H0.50:ssGWAS\_NCSNP\_H0.80`

[1] "QTL\_ID=21147" "QTL\_ID=29831" "QTL\_ID=29833" "QTL\_ID=32557" "QTL\_ID=106980" "QTL\_ID=107136"  
[7] "QTL\_ID=158047" "QTL\_ID=15493" "QTL\_ID=15494" "QTL\_ID=35479" "QTL\_ID=35948"

#### \$`ssGWAS\_NCSNP\_H0.15:ssGWAS\_NCSNP\_H0.50:ssGWAS\_NCSNP\_H0.80`

[1] "QTL\_ID=64006" "QTL\_ID=64007" "QTL\_ID=41728" "QTL\_ID=41731" "QTL\_ID=41732" "QTL\_ID=41737"  
[7] "QTL\_ID=41738" "QTL\_ID=41739" "QTL\_ID=41741" "QTL\_ID=41742" "QTL\_ID=41743" "QTL\_ID=41729"  
[13] "QTL\_ID=41733" "QTL\_ID=41735" "QTL\_ID=41736" "QTL\_ID=41726" "QTL\_ID=41730" "QTL\_ID=41734"  
[19] "QTL\_ID=41740" "QTL\_ID=41727" "QTL\_ID=43369" "QTL\_ID=43370" "QTL\_ID=43372" "QTL\_ID=43373"  
[25] "QTL\_ID=43374" "QTL\_ID=43375" "QTL\_ID=43376" "QTL\_ID=43378" "QTL\_ID=43379" "QTL\_ID=43380"  
[31] "QTL\_ID=43381" "QTL\_ID=43383" "QTL\_ID=43384" "QTL\_ID=43386" "QTL\_ID=43387" "QTL\_ID=43388"  
[37] "QTL\_ID=43389" "QTL\_ID=43390" "QTL\_ID=43392" "QTL\_ID=43393" "QTL\_ID=43394" "QTL\_ID=43395"  
[43] "QTL\_ID=43368" "QTL\_ID=43371" "QTL\_ID=43377" "QTL\_ID=43382" "QTL\_ID=43385" "QTL\_ID=43391"  
[49] "QTL\_ID=50404" "QTL\_ID=50406" "QTL\_ID=50407" "QTL\_ID=50409" "QTL\_ID=50413" "QTL\_ID=50414"  
[55] "QTL\_ID=50415" "QTL\_ID=50416" "QTL\_ID=50417" "QTL\_ID=50412" "QTL\_ID=164127" "QTL\_ID=164206"  
[61] "QTL\_ID=164416" "QTL\_ID=164436" "QTL\_ID=164476" "QTL\_ID=164535" "QTL\_ID=176528" "QTL\_ID=186241"  
[67] "QTL\_ID=190174" "QTL\_ID=50405" "QTL\_ID=50408" "QTL\_ID=50410" "QTL\_ID=66693" "QTL\_ID=50403"  
[73] "QTL\_ID=50411" "QTL\_ID=157031" "QTL\_ID=157030" "QTL\_ID=14785"
