# Supplementary material for: Haplotype-Based Single-Step GWAS for Yearling Temperament in American Angus Cattle
Source: MDPI journal article supplement (doi:10.3390/genes13010017), 2021-12-22
Supplement: s1 [file s1]

### Specific and overlapped genes for ssGWAS\_H0.15 and ssGWAS\_NCSNP\_H0.15

\$ssGWAS\_H0.15`

\$ssGWAS\_NCSNP\_H0.15

[1] "P2RY12" "MED12L" "KCNH8" "SUGCT" "misc\_RNA" "IL7" "PTPRC" "KRT31" "KRT34"  
[10] "CACNA2D3" "HMGCLL1" "DOCK1" "MGMT" "NRG3"

\$ssGWAS\_H0.15:ssGWAS\_NCSNP\_H0.15`

[1] "5S\_rRNA" "UMAD1" "FUT9" "VAX2" "ATP6V1B1" "ANKRD53" "MLKL" "FA2H" "SPEF2"  
[10] "PLXNA1" "FOXP4"

### Specific and overlapped genes for ssGWAS\_H0.50 and ssGWAS\_NCSNP\_H0.50

\$ssGWAS\_H0.50

[1] "COMMD10"

\$ssGWAS\_NCSNP\_H0.50

[1] "7SK" "CSMD2" "PPP1R7" "SEPTIN7" "U6" "ATXN10" "ATXN10" "C2CD4C" "BCKDHB"  
[10] "ADAM10" "TEX261" "ATP6V1B1" "ANKRD53" "THADA" "AKAP11" "MYBL1" "U6" "ABTB2"  
[19] "CAPRIN1" "NAT10" "PTPRC" "KSR2" "UPB1" "SNRPD3" "GUCD1" "ADGRG1" "CEP89"  
[28] "ZZEF1" "CACNA2D3" "HMGCLL1" "FOXP4" "DOCK1" "MGMT" "MFHAS1" "SH2D4A" "ADAMTS8"  
[37] "SLC3A2" "SNORD25" "SNORD26" "SNORD27" "MXRA5" "CD99"

\$ssGWAS\_H0.50:ssGWAS\_NCSNP\_H0.50`

[1] "RWDD3" "5S\_rRNA" "UMAD1" "GALC" "CRISPLD1" "SPEF2"

### Specific and overlapped genes for ssGWAS\_H0.80 and ssGWAS\_NCSNP\_H0.80

\$ssGWAS\_H0.80

[1] "NID2" "PLXDC1" "DOCK1"

\$ssGWAS\_NCSNP\_H0.80

[1] "PCOLCE2" "KCNH8" "7SK" "5S\_rRNA" "UMAD1" "FBXL13" "LRRRC17" "ATXN10" "GBA3"  
[10] "U6" "KANK1" "BCKDHB" "ZNF638" "THADA" "NCOA3" "MYBL1" "U6" "IL7"  
[19] "PTPRC" "KSR2" "PPP2R5C" "CACNA2D3" "HMGCLL1" "RREB1" "PRKG1" "MGMT" "DLC1"  
[28] "OPCML" "ADAMTS8" "MXRA5"

\$ssGWAS\_H0.80:ssGWAS\_NCSNP\_H0.80`

[1] "CRISPLD1" "SPEF2"

### Specific and overlapped genes considering all ssGWAS using haplotypes only (ssGWAS\_H0.15, ssGWAS\_H0.50, and ssGWAS\_H0.80)

\$ssGWAS\_H0.15

[1] "FUT9" "VAX2" "ATP6V1B1" "ANKRD53" "MLKL" "FA2H" "PLXNA1" "FOXP4"

\$ssGWAS\_H0.50

[1] "RWDD3" "COMMD10" "GALC"

\$ssGWAS\_H0.80

[1] "NID2" "PLXDC1" "DOCK1"

\$`ssGWAS\_H0.15:ssGWAS\_H0.50`

[1] "5S\_rRNA" "UMAD1"

\$`ssGWAS\_H0.50:ssGWAS\_H0.80`

[1] "CRISPLD1"

\$`ssGWAS\_H0.15:ssGWAS\_H0.50:ssGWAS\_H0.80`

[1] "SPEF2"

**Specific and overlapped genes considering all ssGWAS using non-clustered SNPs and haplotypes  
(ssGWAS\_NCSNP\_H0.15, ssGWAS\_NCSNP\_H0.50, and ssGWAS\_NCSNP\_H0.80)**

\$ssGWAS\_NCSNP\_H0.15

[1] "P2RY12" "MED12L" "SUGCT" "FUT9" "VAX2" "misc\_RNA" "MLKL" "FA2H" "KRT31"

[10] "KRT34" "PLXNA1" "NRG3"

\$ssGWAS\_NCSNP\_H0.50

[1] "RWDD3" "CSMD2" "PPP1R7" "SEPTIN7" "C2CD4C" "ADAM10" "GALC" "TEX261" "AKAP11" "ABTB2"

[11] "CAPRIN1" "NAT10" "UPB1" "SNRPD3" "GUCD1" "ADGRG1" "CEP89" "ZZEF1" "MFHAS1" "SH2D4A"

[21] "SLC3A2" "SNORD25" "SNORD26" "SNORD27" "CD99"

\$ssGWAS\_NCSNP\_H0.80

[1] "PCOLCE2" "FBXL13" "LRRC17" "GBA3" "KANK1" "ZNF638" "NCOA3" "PPP2R5C" "RREB1" "PRKG1"

[11] "DLC1" "OPCML"

\$`ssGWAS\_NCSNP\_H0.15:ssGWAS\_NCSNP\_H0.50`

[1] "ATP6V1B1" "ANKRD53" "FOXP4" "DOCK1"

\$`ssGWAS\_NCSNP\_H0.15:ssGWAS\_NCSNP\_H0.80`

[1] "KCNH8" "IL7"

\$`ssGWAS\_NCSNP\_H0.50:ssGWAS\_NCSNP\_H0.80`

[1] "7SK" "U6" "ATXN10" "ATXN10" "BCKDHB" "THADA" "MYBL1" "U6" "CRISPLD1"

[10] "KSR2" "ADAMTS8" "MXRA5"

\$`ssGWAS\_NCSNP\_H0.15:ssGWAS\_NCSNP\_H0.50:ssGWAS\_NCSNP\_H0.80`

[1] "5S\_rRNA" "UMAD1" "PTPRC" "SPEF2" "CACNA2D3" "HMGCLL1" "MGMT"
