# Supplementary material for: Haplotype-Based Single-Step GWAS for Yearling Temperament in American Angus Cattle
Source: MDPI journal article supplement (doi:10.3390/genes13010017), 2021-12-22
Supplement: s1 [file s1]

Supplementary Table S9. Correlations between the genomic estimated breeding values (GEBV) used in the single-step GWAS (ssGWAS) and weighted ssGWAS in the second (WssGWAS\_2) and third (WssGWAS\_3) iterations with haplotypes and non-clustered SNPs for yearling temperament in American Angus.

| Marker Information   | LD <sup>1</sup> | WssGWAS 2 | WssGWAS 3 |
|----------------------|-----------------|-----------|-----------|
| Haplotypes           | 0.15            | 0.988     | 0.982     |
|                      | 0.50            | 0.990     | 0.984     |
|                      | 0.80            | 0.987     | 0.981     |
| NCSNP and Haplotypes | 0.15            | 0.992     | 0.989     |
|                      | 0.50            | 0.994     | 0.991     |
|                      | 0.80            | 0.989     | 0.985     |

<sup>1</sup> Linkage disequilibrium.
