# Supplementary material for: Haplotype-Based Single-Step GWAS for Yearling Temperament in American Angus Cattle
Source: Genes (Basel). 2021 Dec 22;13(1):17. doi: 10.3390/genes13010017 (PMC8775055; doi:10.3390/genes13010017)
Supplement: Supplementary file 1 [file genes-13-00017-s001.zip]

Archive with 9 entries (9 files):
- genes-1492001-supplementary/Supplementary_File_S1.pdf
- genes-1492001-supplementary/Supplementary_File_S2.xlsx
- genes-1492001-supplementary/Supplementary_File_S3.xlsx
- genes-1492001-supplementary/Supplementary_File_S4.pdf
- genes-1492001-supplementary/Supplementary_File_S5.pdf
- genes-1492001-supplementary/Supplementary_File_S6.xlsx
- genes-1492001-supplementary/Supplementary_File_S7.xlsx
- genes-1492001-supplementary/Supplementary_File_S8.pdf
- genes-1492001-supplementary/Supplementary_File_S9.pdf
