# Supplementary material for: Haplotype-Based Single-Step GWAS for Yearling Temperament in American Angus Cattle
Source: Genes (Basel). 2021 Dec 22;13(1):17. doi: 10.3390/genes13010017 (PMC8775055; doi:10.3390/genes13010017)
Supplement: Supplementary file 1 [file genes-13-00017-s001.zip › genes-1492001-supplementary/Supplementary_File_S2.xlsx]

## Sheet: Haplotypes_LD0.15_top_0.001%
Genes overlapped with the top 0.001% markers in percentage of variance explained
Chromosome	Marker	Start_SNP (marker)	END_SNP (marker)	Start_Position (marker)	End_Position (marker)	Size_in_kb(marker)	%Variance_explained	Ensembl_gene_ID	Start_Position (gene)	End_Position (gene)	Gene_name	Gene_type
1	block_387_chr_1	rs41661378	rs42296756	110396001	110420546	24545	0.08263
2	block_232_chr_2	rs42865738	rs42452794	59000546	59024466	23920	0.09247
3	block_137_chr_3	rs41624161	rs42967999	46986210	47013530	27320	0.10199
4	block_46_chr_4	rs41659143	rs41659140	15935175	15961687	26512	0.08244	ENSBTAG00000043805	15943455	15943556	5S_rRNA	rRNA
4	block_46_chr_4	rs41659143	rs41659140	15935175	15961687	26512	0.08244	ENSBTAG00000047004	15734909	15991563	UMAD1	protein_coding
4	block_87_chr_4	rs29013539	rs41653992	26796377	26854185	57808	0.08077
7	block_342_chr_7	rs41605716	rs41580804	89523902	89546406	22504	0.07639
9	block_188_chr_9	rs41575824	rs42411844	53639845	53659493	19648	0.08087	ENSBTAG00000007989	53645198	53646339	FUT9	protein_coding
11	block_70_chr_11	rs110341524	rs109073558	13441766	13510010	68244	0.07998	ENSBTAG00000010605	13482524	13508824	VAX2	protein_coding
11	block_70_chr_11	rs110341524	rs109073558	13441766	13510010	68244	0.07998	ENSBTAG00000010620	13454348	13480401	ATP6V1B1	protein_coding
11	block_70_chr_11	rs110341524	rs109073558	13441766	13510010	68244	0.07998	ENSBTAG00000010623	13434822	13442574	ANKRD53	protein_coding
11	block_70_chr_11	rs110341524	rs109073558	13441766	13510010	68244	0.07998	ENSBTAG00000051968	13509110	13509305	misc_RNA
18	block_6_chr_18	rs110151403	rs109766638	2132264	2159912	27648	0.08335	ENSBTAG00000012216	2123144	2146610	MLKL	protein_coding
18	block_6_chr_18	rs110151403	rs109766638	2132264	2159912	27648	0.08335	ENSBTAG00000012222	2151216	2205687	FA2H	protein_coding
20	block_143_chr_20	rs42543872	rs42543895	38543545	38571692	28147	0.0897	ENSBTAG00000023529	38369475	38572090	SPEF2	protein_coding
22	block_244_chr_22	rs110904383	rs109051741	60225202	60258838	33636	0.09592	ENSBTAG00000009159	60240226	60280068	PLXNA1	protein_coding
22	block_92_chr_22	rs42003955	rs109009750	23083081	23111139	28058	0.14619
23	block_59_chr_23	rs109152735	rs109130384	15338295	15367501	29206	0.09398	ENSBTAG00000014211	15366276	15417429	FOXP4	protein_coding
26	block_39_chr_26	rs41592466	rs42478675	12333205	12369234	36029	0.08559
27	block_96_chr_27	rs29013433	rs41646744	24812065	24839161	27096	0.0826
27	block_97_chr_27	rs41584803	rs29023022	24976943	25015613	38670	0.08255
29	block_75_chr_29	rs41575769	rs29021971	24098223	24117260	19037	0.09894	ENSBTAG00000048576	24002708	24295209	protein_coding
QTL overlapped with the top 0.001% markers in percentage of variance explained
Chromosome	Marker	Start_SNP (marker)	END_SNP (marker)	Start_Position (marker)	End_Position (marker)	Size_in_kb(marker)	%Variance_explained	QTL_Type	Start_Position (QTL)	End_Position (QTL)	QTL_ID	Trait_associated	Trait_Abreviation	Breeds_found	Tag_SNP
3	block_137_chr_3	rs41624161	rs42967999	46986210	47013530	27320	0.10199	Exterior	47013528	47013532	QTL_ID=39799	trait=Rump_angle	Abbrev=RANG	breed=holstein	rs109460728
3	block_137_chr_3	rs41624161	rs42967999	46986210	47013530	27320	0.10199	Milk	47013528	47013532	QTL_ID=39795	trait=Milk_fat_yield	Abbrev=FY	breed=holstein	rs109460728
3	block_137_chr_3	rs41624161	rs42967999	46986210	47013530	27320	0.10199	Milk	47013528	47013532	QTL_ID=39796	trait=Milk_yield	Abbrev=MY	breed=holstein	rs109460728
3	block_137_chr_3	rs41624161	rs42967999	46986210	47013530	27320	0.10199	Milk	47013528	47013532	QTL_ID=39798	trait=Milk_protein_yield	Abbrev=PY	breed=holstein	rs109460728
3	block_137_chr_3	rs41624161	rs42967999	46986210	47013530	27320	0.10199	Milk	.	.	QTL_ID=105587	trait=Milk_protein_percentage	Abbrev=PP	breed=charolais,chianina,gelbvieh,hereford,holstein,limousin,piedmontese,red_angus,simmental,Angus,Maine-Anjou	rs42967999
3	block_137_chr_3	rs41624161	rs42967999	46986210	47013530	27320	0.10199	Production	47013528	47013532	QTL_ID=39797	trait=Net_merit	Abbrev=NM	breed=holstein	rs109460728
3	block_137_chr_3	rs41624161	rs42967999	46986210	47013530	27320	0.10199	Production	.	.	QTL_ID=5321	trait=Residual_feed_intake	Abbrev=RFI	breed=holstein	rs42967999
3	block_137_chr_3	rs41624161	rs42967999	46986210	47013530	27320	0.10199	Reproduction	47013528	47013532	QTL_ID=39794	trait=Calving_ease_(maternal)	Abbrev=CALEASE	breed=holstein	rs109460728
3	block_137_chr_3	rs41624161	rs42967999	46986210	47013530	27320	0.10199	Reproduction	47013528	47013532	QTL_ID=39800	trait=Calving_ease	Abbrev=CALEASE	breed=holstein	rs109460728
4	block_87_chr_4	rs29013539	rs41653992	26796377	26854185	57808	0.08077	Milk	26854183	26854187	QTL_ID=26726	trait=Milk_protein_percentage	Abbrev=PP	breed=holstein	rs110562779
7	block_342_chr_7	rs41605716	rs41580804	89523902	89546406	22504	0.07639	Exterior	89523900	89523904	QTL_ID=43369	trait=Dairy_form	Abbrev=DYF	breed=brahman	rs29025644,rs110378393
7	block_342_chr_7	rs41605716	rs41580804	89523902	89546406	22504	0.07639	Exterior	89523900	89523904	QTL_ID=43370	trait=Feet_and_leg_conformation	Abbrev=FTLEG	breed=charolais,chianina,gelbvieh,hereford,holstein,limousin,piedmontese,red_angus,simmental,Angus,Maine-Anjou	rs43643999,rs109559045
7	block_342_chr_7	rs41605716	rs41580804	89523902	89546406	22504	0.07639	Exterior	89523900	89523904	QTL_ID=43372	trait=Teat_placement_-_front	Abbrev=FTPL	breed=holstein	rs41656867,rs109989268
7	block_342_chr_7	rs41605716	rs41580804	89523902	89546406	22504	0.07639	Exterior	89523900	89523904	QTL_ID=43373	trait=Udder_attachment	Abbrev=UA	breed=holstein	rs43642998,rs43650173
7	block_342_chr_7	rs41605716	rs41580804	89523902	89546406	22504	0.07639	Exterior	89523900	89523904	QTL_ID=43374	trait=Rear_leg_placement_-_rear_view	Abbrev=RLEGR	breed=holstein	rs109914287,rs43650187
7	block_342_chr_7	rs41605716	rs41580804	89523902	89546406	22504	0.07639	Exterior	89523900	89523904	QTL_ID=43375	trait=Teat_placement_-_rear	Abbrev=RTPL	breed=charolais,chianina,gelbvieh,hereford,holstein,limousin,piedmontese,red_angus,simmental,Angus,Maine-Anjou	rs110179938,rs110169119
7	block_342_chr_7	rs41605716	rs41580804	89523902	89546406	22504	0.07639	Exterior	89523900	89523904	QTL_ID=43376	trait=Udder_height	Abbrev=UHT	breed=charolais,gelbvieh,hereford,limousin,pinzgauer,red_angus,red_poll,simmental,Angus	rs110201865,rs110056495
7	block_342_chr_7	rs41605716	rs41580804	89523902	89546406	22504	0.07639	Exterior	89523900	89523904	QTL_ID=43378	trait=Stature	Abbrev=STA	breed=charolais,gelbvieh,hereford,limousin,pinzgauer,red_angus,red_poll,simmental,Angus	rs43642675,rs43643308
7	block_342_chr_7	rs41605716	rs41580804	89523902	89546406	22504	0.07639	Exterior	89523900	89523904	QTL_ID=43379	trait=Strength	Abbrev=STR	breed=charolais,gelbvieh,hereford,limousin,pinzgauer,red_angus,red_poll,simmental,Angus	rs41593885,rs110566925
7	block_342_chr_7	rs41605716	rs41580804	89523902	89546406	22504	0.07639	Exterior	89523900	89523904	QTL_ID=43380	trait=Udder_cleft	Abbrev=UC	breed=holstein	rs43647828,rs42868836
7	block_342_chr_7	rs41605716	rs41580804	89523902	89546406	22504	0.07639	Exterior	89523900	89523904	QTL_ID=43381	trait=Udder_depth	Abbrev=UDPTH	breed=holstein	rs110584450,rs109103352
7	block_342_chr_7	rs41605716	rs41580804	89523902	89546406	22504	0.07639	Exterior	89546404	89546408	QTL_ID=43383	trait=Dairy_form	Abbrev=DYF	breed=holstein	rs132960291,rs110702652,rs136362611
7	block_342_chr_7	rs41605716	rs41580804	89523902	89546406	22504	0.07639	Exterior	89546404	89546408	QTL_ID=43384	trait=Feet_and_leg_conformation	Abbrev=FTLEG	breed=charolais,gelbvieh,hereford,limousin,pinzgauer,red_angus,red_poll,simmental,Angus	rs132960291,rs110702652,rs136362611
7	block_342_chr_7	rs41605716	rs41580804	89523902	89546406	22504	0.07639	Exterior	89546404	89546408	QTL_ID=43386	trait=Teat_placement_-_front	Abbrev=FTPL	breed=ayrshire,danish_red,holstein,jersey,norwegian_red,Swedish_Red-and-White	rs43619255,rs41655411,rs43614585
7	block_342_chr_7	rs41605716	rs41580804	89523902	89546406	22504	0.07639	Exterior	89546404	89546408	QTL_ID=43387	trait=Udder_attachment	Abbrev=UA	breed=holstein	rs135198463,rs41597142,rs136081666
7	block_342_chr_7	rs41605716	rs41580804	89523902	89546406	22504	0.07639	Exterior	89546404	89546408	QTL_ID=43388	trait=Rear_leg_placement_-_rear_view	Abbrev=RLEGR	breed=holstein	rs109898540
7	block_342_chr_7	rs41605716	rs41580804	89523902	89546406	22504	0.07639	Exterior	89546404	89546408	QTL_ID=43389	trait=Teat_placement_-_rear	Abbrev=RTPL	breed=holstein	rs109755494
7	block_342_chr_7	rs41605716	rs41580804	89523902	89546406	22504	0.07639	Exterior	89546404	89546408	QTL_ID=43390	trait=Udder_height	Abbrev=UHT	breed=holstein	rs109220955
7	block_342_chr_7	rs41605716	rs41580804	89523902	89546406	22504	0.07639	Exterior	89546404	89546408	QTL_ID=43392	trait=Stature	Abbrev=STA	breed=holstein	rs29022040
7	block_342_chr_7	rs41605716	rs41580804	89523902	89546406	22504	0.07639	Exterior	89546404	89546408	QTL_ID=43393	trait=Strength	Abbrev=STR	breed=holstein	rs137826123
7	block_342_chr_7	rs41605716	rs41580804	89523902	89546406	22504	0.07639	Exterior	89546404	89546408	QTL_ID=43394	trait=Udder_cleft	Abbrev=UC	breed=brahman	rs133252628
7	block_342_chr_7	rs41605716	rs41580804	89523902	89546406	22504	0.07639	Exterior	89546404	89546408	QTL_ID=43395	trait=Udder_depth	Abbrev=UDPTH	breed=brahman	rs137713131
7	block_342_chr_7	rs41605716	rs41580804	89523902	89546406	22504	0.07639	Production	89523900	89523904	QTL_ID=43368	trait=Body_depth	Abbrev=BD	breed=blonde_d'aquitaine	rs42802606,rs41656325
7	block_342_chr_7	rs41605716	rs41580804	89523902	89546406	22504	0.07639	Production	89523900	89523904	QTL_ID=43371	trait=PTA_type	Abbrev=PTAT	breed=charolais,chianina,gelbvieh,hereford,holstein,limousin,piedmontese,red_angus,simmental,Angus,Maine-Anjou	rs43642952,rs43637279
7	block_342_chr_7	rs41605716	rs41580804	89523902	89546406	22504	0.07639	Production	89523900	89523904	QTL_ID=43377	trait=Rump_width	Abbrev=RUMWD	breed=Angus	rs110838923,rs41594273
7	block_342_chr_7	rs41605716	rs41580804	89523902	89546406	22504	0.07639	Production	89546404	89546408	QTL_ID=43382	trait=Body_depth	Abbrev=BD	breed=holstein	rs43643837,rs42868892
7	block_342_chr_7	rs41605716	rs41580804	89523902	89546406	22504	0.07639	Production	89546404	89546408	QTL_ID=43385	trait=PTA_type	Abbrev=PTAT	breed=holstein	rs43619255,rs41655411,rs43614585
7	block_342_chr_7	rs41605716	rs41580804	89523902	89546406	22504	0.07639	Production	89546404	89546408	QTL_ID=43391	trait=Rump_width	Abbrev=RUMWD	breed=holstein	rs137527434
18	block_6_chr_18	rs110151403	rs109766638	2132264	2159912	27648	0.08335	Exterior	2159910	2159914	QTL_ID=49435	trait=Foot_angle	Abbrev=FANG	breed=brown_swiss	rs110423515
18	block_6_chr_18	rs110151403	rs109766638	2132264	2159912	27648	0.08335	Exterior	2159910	2159914	QTL_ID=49436	trait=Feet_and_leg_conformation	Abbrev=FTLEG	breed=brown_swiss	rs41653204
18	block_6_chr_18	rs110151403	rs109766638	2132264	2159912	27648	0.08335	Exterior	2159910	2159914	QTL_ID=49439	trait=Udder_attachment	Abbrev=UA	breed=brown_swiss	rs111007616
18	block_6_chr_18	rs110151403	rs109766638	2132264	2159912	27648	0.08335	Exterior	2159910	2159914	QTL_ID=49445	trait=Rear_leg_placement_-_rear_view	Abbrev=RLEGR	breed=brown_swiss	rs41923843
18	block_6_chr_18	rs110151403	rs109766638	2132264	2159912	27648	0.08335	Exterior	2159910	2159914	QTL_ID=49446	trait=Rear_leg_placement_-_side_view	Abbrev=RLEGS	breed=brown_swiss	rs41924637
18	block_6_chr_18	rs110151403	rs109766638	2132264	2159912	27648	0.08335	Exterior	2159910	2159914	QTL_ID=49449	trait=Strength	Abbrev=STR	breed=brown_swiss	rs441811558
18	block_6_chr_18	rs110151403	rs109766638	2132264	2159912	27648	0.08335	Exterior	2159910	2159914	QTL_ID=49450	trait=Udder_depth	Abbrev=UDPTH	breed=brown_swiss	rs109195501
18	block_6_chr_18	rs110151403	rs109766638	2132264	2159912	27648	0.08335	Milk	2159910	2159914	QTL_ID=49437	trait=Milk_fat_percentage	Abbrev=FP	breed=brown_swiss	rs109603247
18	block_6_chr_18	rs110151403	rs109766638	2132264	2159912	27648	0.08335	Milk	2159910	2159914	QTL_ID=49440	trait=Milk_fat_yield	Abbrev=FY	breed=brown_swiss	rs386089602,rs380102255,rs384012411
18	block_6_chr_18	rs110151403	rs109766638	2132264	2159912	27648	0.08335	Milk	2159910	2159914	QTL_ID=49443	trait=Milk_protein_percentage	Abbrev=PP	breed=brown_swiss	rs134785404
18	block_6_chr_18	rs110151403	rs109766638	2132264	2159912	27648	0.08335	Milk	2159910	2159914	QTL_ID=49444	trait=Milk_protein_yield	Abbrev=PY	breed=brown_swiss	rs41923838
18	block_6_chr_18	rs110151403	rs109766638	2132264	2159912	27648	0.08335	Production	2159910	2159914	QTL_ID=49438	trait=PTA_type	Abbrev=PTAT	breed=brown_swiss	rs109603247
18	block_6_chr_18	rs110151403	rs109766638	2132264	2159912	27648	0.08335	Production	2159910	2159914	QTL_ID=49441	trait=Net_merit	Abbrev=NM	breed=brown_swiss	rs380102255
18	block_6_chr_18	rs110151403	rs109766638	2132264	2159912	27648	0.08335	Production	2159910	2159914	QTL_ID=49442	trait=Length_of_productive_life	Abbrev=PL	breed=brown_swiss	rs110523614
18	block_6_chr_18	rs110151403	rs109766638	2132264	2159912	27648	0.08335	Reproduction	2132262	2132266	QTL_ID=106866	trait=Conception_rate	Abbrev=CONCRATE	breed=brown_swiss	rs109623709
18	block_6_chr_18	rs110151403	rs109766638	2132264	2159912	27648	0.08335	Reproduction	2159910	2159914	QTL_ID=49434	trait=Calving_ease_(maternal)	Abbrev=CALEASE	breed=brown_swiss	rs110805991
18	block_6_chr_18	rs110151403	rs109766638	2132264	2159912	27648	0.08335	Reproduction	2159910	2159914	QTL_ID=49447	trait=Calving_ease	Abbrev=CALEASE	breed=brown_swiss	rs801239373,rs41923848,rs1116256555
18	block_6_chr_18	rs110151403	rs109766638	2132264	2159912	27648	0.08335	Reproduction	2159910	2159914	QTL_ID=49448	trait=Stillbirth	Abbrev=SB	breed=brown_swiss	rs801239373,rs41923848,rs1116256555
23	block_59_chr_23	rs109152735	rs109130384	15338295	15367501	29206	0.09398	Production	15338293	15338297	QTL_ID=65985	trait=Body_weight	Abbrev=BW	breed=holstein	rs135126068
26	block_39_chr_26	rs41592466	rs42478675	12333205	12369234	36029	0.08559	Milk	12333203	12333207	QTL_ID=198366	trait=Milk_C14_index	Abbrev=MC14	breed=holstein	rs133825521
26	block_39_chr_26	rs41592466	rs42478675	12333205	12369234	36029	0.08559	Milk	12362522	12362526	QTL_ID=196694	trait=Milk_C14_index	Abbrev=MC14	breed=jersey	rs109909331
26	block_39_chr_26	rs41592466	rs42478675	12333205	12369234	36029	0.08559	Milk	12362522	12362526	QTL_ID=201952	trait=Milk_myristoleic_acid_content	Abbrev=MFA-C14:1	breed=jersey	rs109909331
26	block_39_chr_26	rs41592466	rs42478675	12333205	12369234	36029	0.08559	Milk	12363689	12363693	QTL_ID=197280	trait=Milk_C14_index	Abbrev=MC14	breed=holstein	rs134317139
26	block_39_chr_26	rs41592466	rs42478675	12333205	12369234	36029	0.08559	Milk	12363689	12363693	QTL_ID=202502	trait=Milk_myristoleic_acid_content	Abbrev=MFA-C14:1	breed=holstein	rs41660969
26	block_39_chr_26	rs41592466	rs42478675	12333205	12369234	36029	0.08559	Milk	12366434	12366438	QTL_ID=198163	trait=Milk_C14_index	Abbrev=MC14	breed=holstein	rs41660969
26	block_39_chr_26	rs41592466	rs42478675	12333205	12369234	36029	0.08559	Milk	12366434	12366438	QTL_ID=203349	trait=Milk_myristoleic_acid_content	Abbrev=MFA-C14:1	breed=holstein	rs41660969
26	block_39_chr_26	rs41592466	rs42478675	12333205	12369234	36029	0.08559	Milk	12369232	12369236	QTL_ID=199795	trait=Milk_C14_index	Abbrev=MC14	breed=jersey	rs109193590
26	block_39_chr_26	rs41592466	rs42478675	12333205	12369234	36029	0.08559	Milk	12369232	12369236	QTL_ID=204890	trait=Milk_myristoleic_acid_content	Abbrev=MFA-C14:1	breed=jersey	rs797226609
27	block_96_chr_27	rs29013433	rs41646744	24812065	24839161	27096	0.0826	Reproduction	24839159	24839163	QTL_ID=62078	trait=Sperm_motility	Abbrev=SPMOT	breed=jersey

## Sheet: Haplotypes_LD0.50_top_0.001%
Genes overlapped with the top 0.001% markers in percentage of variance explained
Chromosome	Marker	Start_SNP (marker)	END_SNP (marker)	Start_Position (marker)	End_Position (marker)	Size_in_kb(marker)	%Variance_explained	Ensembl_gene_ID	Start_Position (gene)	End_Position (gene)	Gene_name	Gene_type
1	block_132_chr_1	rs43238752	rs41575644	64893868	64920298	26430	0.14745
1	block_240_chr_1	rs41661378	rs42296756	110396001	110420546	24545	0.13892
3	block_83_chr_3	rs43339412	rs43712305	48234094	48259870	25776	0.12191	ENSBTAG00000021537	48239823	48252404	RWDD3	protein_coding
4	block_29_chr_4	rs41659143	rs41659140	15935175	15961687	26512	0.12366	ENSBTAG00000043805	15943455	15943556	5S_rRNA	rRNA
4	block_29_chr_4	rs41659143	rs41659140	15935175	15961687	26512	0.12366	ENSBTAG00000047004	15734909	15991563	UMAD1	protein_coding
7	block_233_chr_7	rs41605716	rs41580804	89523902	89546406	22504	0.13307
7	block_82_chr_7	rs42487828	rs41630389	37616287	37710008	93721	0.13469	ENSBTAG00000019071	37598772	37783067	COMMD10	protein_coding
8	block_11_chr_8	rs42819192	rs42819198	6859755	6884117	24362	0.1384
10	block_220_chr_10	rs110572986	rs109837613	99680118	99710643	30525	0.13293	ENSBTAG00000001124	99667901	99724558	GALC	protein_coding
14	block_126_chr_14	rs42382244	rs43089152	38274985	38304478	29493	0.13372	ENSBTAG00000004411	38295064	38345541	CRISPLD1	protein_coding
14	block_25_chr_14	rs109634189	rs110502094	5268069	5299013	30944	0.12049
20	block_80_chr_20	rs42543872	rs42543895	38543545	38571692	28147	0.1623	ENSBTAG00000023529	38369475	38572090	SPEF2	protein_coding
QTL overlapped with the top 0.001% markers in percentage of variance explained
Chromosome	Marker	Start_SNP (marker)	END_SNP (marker)	Start_Position (marker)	End_Position (marker)	Size_in_kb(marker)	%Variance_explained	QTL_Type	Start_Position (QTL)	End_Position (QTL)	QTL_ID	Trait_associated	Trait_Abreviation	Breeds_found	Tag_SNP
1	block_132_chr_1	rs43238752	rs41575644	64893868	64920298	26430	0.14745	Reproduction	64893866	64893870	QTL_ID=21147	trait=Age_at_puberty	Abbrev=PUBAGE	breed=holstein	rs42462826
1	block_132_chr_1	rs43238752	rs41575644	64893868	64920298	26430	0.14745	Reproduction	64893866	64893870	QTL_ID=29831	trait=Age_at_puberty	Abbrev=PUBAGE	breed=holstein	rs41633081
1	block_132_chr_1	rs43238752	rs41575644	64893868	64920298	26430	0.14745	Reproduction	64920296	64920300	QTL_ID=29833	trait=Age_at_puberty	Abbrev=PUBAGE	breed=holstein	rs29019349
3	block_83_chr_3	rs43339412	rs43712305	48234094	48259870	25776	0.12191	Production	48234092	48234096	QTL_ID=164356	trait=Body_weight_(birth)	Abbrev=BW	breed=holstein	rs41596889
7	block_233_chr_7	rs41605716	rs41580804	89523902	89546406	22504	0.13307	Exterior	89523900	89523904	QTL_ID=43369	trait=Dairy_form	Abbrev=DYF	breed=brahman	rs29025644,rs110378393
7	block_233_chr_7	rs41605716	rs41580804	89523902	89546406	22504	0.13307	Exterior	89523900	89523904	QTL_ID=43370	trait=Feet_and_leg_conformation	Abbrev=FTLEG	breed=charolais,chianina,gelbvieh,hereford,holstein,limousin,piedmontese,red_angus,simmental,Angus,Maine-Anjou	rs43643999,rs109559045
7	block_233_chr_7	rs41605716	rs41580804	89523902	89546406	22504	0.13307	Exterior	89523900	89523904	QTL_ID=43372	trait=Teat_placement_-_front	Abbrev=FTPL	breed=holstein	rs41656867,rs109989268
7	block_233_chr_7	rs41605716	rs41580804	89523902	89546406	22504	0.13307	Exterior	89523900	89523904	QTL_ID=43373	trait=Udder_attachment	Abbrev=UA	breed=holstein	rs43642998,rs43650173
7	block_233_chr_7	rs41605716	rs41580804	89523902	89546406	22504	0.13307	Exterior	89523900	89523904	QTL_ID=43374	trait=Rear_leg_placement_-_rear_view	Abbrev=RLEGR	breed=holstein	rs109914287,rs43650187
7	block_233_chr_7	rs41605716	rs41580804	89523902	89546406	22504	0.13307	Exterior	89523900	89523904	QTL_ID=43375	trait=Teat_placement_-_rear	Abbrev=RTPL	breed=charolais,chianina,gelbvieh,hereford,holstein,limousin,piedmontese,red_angus,simmental,Angus,Maine-Anjou	rs110179938,rs110169119
7	block_233_chr_7	rs41605716	rs41580804	89523902	89546406	22504	0.13307	Exterior	89523900	89523904	QTL_ID=43376	trait=Udder_height	Abbrev=UHT	breed=charolais,gelbvieh,hereford,limousin,pinzgauer,red_angus,red_poll,simmental,Angus	rs110201865,rs110056495
7	block_233_chr_7	rs41605716	rs41580804	89523902	89546406	22504	0.13307	Exterior	89523900	89523904	QTL_ID=43378	trait=Stature	Abbrev=STA	breed=charolais,gelbvieh,hereford,limousin,pinzgauer,red_angus,red_poll,simmental,Angus	rs43642675,rs43643308
7	block_233_chr_7	rs41605716	rs41580804	89523902	89546406	22504	0.13307	Exterior	89523900	89523904	QTL_ID=43379	trait=Strength	Abbrev=STR	breed=charolais,gelbvieh,hereford,limousin,pinzgauer,red_angus,red_poll,simmental,Angus	rs41593885,rs110566925
7	block_233_chr_7	rs41605716	rs41580804	89523902	89546406	22504	0.13307	Exterior	89523900	89523904	QTL_ID=43380	trait=Udder_cleft	Abbrev=UC	breed=holstein	rs43647828,rs42868836
7	block_233_chr_7	rs41605716	rs41580804	89523902	89546406	22504	0.13307	Exterior	89523900	89523904	QTL_ID=43381	trait=Udder_depth	Abbrev=UDPTH	breed=holstein	rs110584450,rs109103352
7	block_233_chr_7	rs41605716	rs41580804	89523902	89546406	22504	0.13307	Exterior	89546404	89546408	QTL_ID=43383	trait=Dairy_form	Abbrev=DYF	breed=holstein	rs132960291,rs110702652,rs136362611
7	block_233_chr_7	rs41605716	rs41580804	89523902	89546406	22504	0.13307	Exterior	89546404	89546408	QTL_ID=43384	trait=Feet_and_leg_conformation	Abbrev=FTLEG	breed=charolais,gelbvieh,hereford,limousin,pinzgauer,red_angus,red_poll,simmental,Angus	rs132960291,rs110702652,rs136362611
7	block_233_chr_7	rs41605716	rs41580804	89523902	89546406	22504	0.13307	Exterior	89546404	89546408	QTL_ID=43386	trait=Teat_placement_-_front	Abbrev=FTPL	breed=ayrshire,danish_red,holstein,jersey,norwegian_red,Swedish_Red-and-White	rs43619255,rs41655411,rs43614585
7	block_233_chr_7	rs41605716	rs41580804	89523902	89546406	22504	0.13307	Exterior	89546404	89546408	QTL_ID=43387	trait=Udder_attachment	Abbrev=UA	breed=holstein	rs135198463,rs41597142,rs136081666
7	block_233_chr_7	rs41605716	rs41580804	89523902	89546406	22504	0.13307	Exterior	89546404	89546408	QTL_ID=43388	trait=Rear_leg_placement_-_rear_view	Abbrev=RLEGR	breed=holstein	rs109898540
7	block_233_chr_7	rs41605716	rs41580804	89523902	89546406	22504	0.13307	Exterior	89546404	89546408	QTL_ID=43389	trait=Teat_placement_-_rear	Abbrev=RTPL	breed=holstein	rs109755494
7	block_233_chr_7	rs41605716	rs41580804	89523902	89546406	22504	0.13307	Exterior	89546404	89546408	QTL_ID=43390	trait=Udder_height	Abbrev=UHT	breed=holstein	rs109220955
7	block_233_chr_7	rs41605716	rs41580804	89523902	89546406	22504	0.13307	Exterior	89546404	89546408	QTL_ID=43392	trait=Stature	Abbrev=STA	breed=holstein	rs29022040
7	block_233_chr_7	rs41605716	rs41580804	89523902	89546406	22504	0.13307	Exterior	89546404	89546408	QTL_ID=43393	trait=Strength	Abbrev=STR	breed=holstein	rs137826123
7	block_233_chr_7	rs41605716	rs41580804	89523902	89546406	22504	0.13307	Exterior	89546404	89546408	QTL_ID=43394	trait=Udder_cleft	Abbrev=UC	breed=brahman	rs133252628
7	block_233_chr_7	rs41605716	rs41580804	89523902	89546406	22504	0.13307	Exterior	89546404	89546408	QTL_ID=43395	trait=Udder_depth	Abbrev=UDPTH	breed=brahman	rs137713131
7	block_233_chr_7	rs41605716	rs41580804	89523902	89546406	22504	0.13307	Production	89523900	89523904	QTL_ID=43368	trait=Body_depth	Abbrev=BD	breed=blonde_d'aquitaine	rs42802606,rs41656325
7	block_233_chr_7	rs41605716	rs41580804	89523902	89546406	22504	0.13307	Production	89523900	89523904	QTL_ID=43371	trait=PTA_type	Abbrev=PTAT	breed=charolais,chianina,gelbvieh,hereford,holstein,limousin,piedmontese,red_angus,simmental,Angus,Maine-Anjou	rs43642952,rs43637279
7	block_233_chr_7	rs41605716	rs41580804	89523902	89546406	22504	0.13307	Production	89523900	89523904	QTL_ID=43377	trait=Rump_width	Abbrev=RUMWD	breed=Angus	rs110838923,rs41594273
7	block_233_chr_7	rs41605716	rs41580804	89523902	89546406	22504	0.13307	Production	89546404	89546408	QTL_ID=43382	trait=Body_depth	Abbrev=BD	breed=holstein	rs43643837,rs42868892
7	block_233_chr_7	rs41605716	rs41580804	89523902	89546406	22504	0.13307	Production	89546404	89546408	QTL_ID=43385	trait=PTA_type	Abbrev=PTAT	breed=holstein	rs43619255,rs41655411,rs43614585
7	block_233_chr_7	rs41605716	rs41580804	89523902	89546406	22504	0.13307	Production	89546404	89546408	QTL_ID=43391	trait=Rump_width	Abbrev=RUMWD	breed=holstein	rs137527434
10	block_220_chr_10	rs110572986	rs109837613	99680118	99710643	30525	0.13293	Production	99706895	99706899	QTL_ID=65486	trait=Maturity_rate	Abbrev=MATRATE	breed=holstein	rs133460908
14	block_25_chr_14	rs109634189	rs110502094	5268069	5299013	30944	0.12049	Milk	5268067	5268071	QTL_ID=27090	trait=Milk_fat_percentage	Abbrev=FP	breed=canchim	rs134711585
14	block_25_chr_14	rs109634189	rs110502094	5268069	5299013	30944	0.12049	Milk	5277630	5277634	QTL_ID=33590	trait=Milk_fat_percentage	Abbrev=FP	breed=Wagyu	rs133041862
14	block_25_chr_14	rs109634189	rs110502094	5268069	5299013	30944	0.12049	Milk	5282481	5282485	QTL_ID=33591	trait=Milk_fat_percentage	Abbrev=FP	breed=brahman	rs111018678
14	block_25_chr_14	rs109634189	rs110502094	5268069	5299013	30944	0.12049	Milk	5283455	5283459	QTL_ID=33592	trait=Milk_fat_percentage	Abbrev=FP	breed=holstein	rs111018678
14	block_25_chr_14	rs109634189	rs110502094	5268069	5299013	30944	0.12049	Milk	5284958	5284962	QTL_ID=33593	trait=Milk_fat_percentage	Abbrev=FP	breed=brahman	rs111018678
14	block_25_chr_14	rs109634189	rs110502094	5268069	5299013	30944	0.12049	Milk	5294936	5294940	QTL_ID=200486	trait=Milk_palmitic_acid_content	Abbrev=MFA-C16:0	breed=holstein	rs110752007
14	block_25_chr_14	rs109634189	rs110502094	5268069	5299013	30944	0.12049	Milk	5294936	5294940	QTL_ID=205641	trait=Milk_palmitoleic_acid_content	Abbrev=MFA-C16:1	breed=holstein	rs133125476
14	block_25_chr_14	rs109634189	rs110502094	5268069	5299013	30944	0.12049	Milk	5294936	5294940	QTL_ID=205642	trait=Milk_oleic_acid_content	Abbrev=MFA-C18:1	breed=holstein	rs110544489
14	block_25_chr_14	rs109634189	rs110502094	5268069	5299013	30944	0.12049	Milk	5294936	5294940	QTL_ID=205643	trait=Milk_linoleic_acid_content	Abbrev=MFA-C18:2	breed=holstein	rs137428346
14	block_25_chr_14	rs109634189	rs110502094	5268069	5299013	30944	0.12049	Milk	5294936	5294940	QTL_ID=205644	trait=Milk_linolenic_acid_content	Abbrev=MFA-C18:3n3	breed=holstein	rs41625651
14	block_25_chr_14	rs109634189	rs110502094	5268069	5299013	30944	0.12049	Milk	5294936	5294940	QTL_ID=205645	trait=Milk_caprylic_acid_content	Abbrev=MFA-C8:0	breed=holstein	rs41572919
14	block_25_chr_14	rs109634189	rs110502094	5268069	5299013	30944	0.12049	Milk	5294936	5294940	QTL_ID=33759	trait=Milk_fat_percentage	Abbrev=FP	breed=brahman	rs134216943
14	block_25_chr_14	rs109634189	rs110502094	5268069	5299013	30944	0.12049	Milk	5298719	5298723	QTL_ID=23204	trait=Milk_vitamin_B-12_content	Abbrev=MVB12	breed=brahman	rs134216943
14	block_25_chr_14	rs109634189	rs110502094	5268069	5299013	30944	0.12049	Milk	5299011	5299015	QTL_ID=14991	trait=Milk_fat_percentage	Abbrev=FP	breed=holstein	rs136480876
14	block_25_chr_14	rs109634189	rs110502094	5268069	5299013	30944	0.12049	Milk	5299011	5299015	QTL_ID=161733	trait=Milk_fat_percentage	Abbrev=FP	breed=holstein	rs110828423
14	block_25_chr_14	rs109634189	rs110502094	5268069	5299013	30944	0.12049	Milk	5299011	5299015	QTL_ID=173725	trait=Milk_fat_percentage	Abbrev=FP	breed=brown_swiss	rs109086264
14	block_25_chr_14	rs109634189	rs110502094	5268069	5299013	30944	0.12049	Milk	5299011	5299015	QTL_ID=25571	trait=Milk_yield	Abbrev=MY	breed=holstein	rs109773526
14	block_25_chr_14	rs109634189	rs110502094	5268069	5299013	30944	0.12049	Milk	5299011	5299015	QTL_ID=25985	trait=Milk_fat_yield	Abbrev=FY	breed=charolais,gelbvieh,hereford,limousin,pinzgauer,red_angus,red_poll,simmental,Angus	rs385094052
14	block_25_chr_14	rs109634189	rs110502094	5268069	5299013	30944	0.12049	Milk	5299011	5299015	QTL_ID=26607	trait=Milk_fat_percentage	Abbrev=FP	breed=holstein	rs109059743
14	block_25_chr_14	rs109634189	rs110502094	5268069	5299013	30944	0.12049	Milk	5299011	5299015	QTL_ID=35367	trait=Milk_fat_yield	Abbrev=FY	breed=brahman	rs134216943
14	block_25_chr_14	rs109634189	rs110502094	5268069	5299013	30944	0.12049	Milk	5299011	5299015	QTL_ID=35573	trait=Milk_fat_percentage	Abbrev=FP	breed=jersey,limousin	rs134216943
14	block_25_chr_14	rs109634189	rs110502094	5268069	5299013	30944	0.12049	Reproduction	5268067	5268071	QTL_ID=24605	trait=Calving_ease	Abbrev=CALEASE	breed=Hanwoo	rs132697104

## Sheet: Haplotypes_LD0.80_top_0.001%
Genes overlapped with the top 0.001% markers in percentage of variance explained
Chromosome	Marker	Start_SNP (marker)	END_SNP (marker)	Start_Position (marker)	End_Position (marker)	Size_in_kb(marker)	%Variance_explained	Ensembl_gene_ID	Start_Position (gene)	End_Position (gene)	Gene_name	Gene_type
7	block_113_chr_7	rs41605716	rs41580804	89523902	89546406	22504	0.27178
10	block_37_chr_10	rs43626304	rs43625453	44850923	44887038	36115	0.24374	ENSBTAG00000021945	44846568	44939145	NID2	protein_coding
14	block_62_chr_14	rs42382244	rs43089152	38274985	38304478	29493	0.26706	ENSBTAG00000004411	38295064	38345541	CRISPLD1	protein_coding
19	block_37_chr_19	rs110135418	rs109002403	39625810	39654574	28764	0.23493	ENSBTAG00000019347	39590711	39657423	PLXDC1	protein_coding
20	block_35_chr_20	rs42543872	rs42543895	38543545	38571692	28147	0.26579	ENSBTAG00000023529	38369475	38572090	SPEF2	protein_coding
26	block_46_chr_26	rs110214513	rs42101711	46728033	46787804	59771	0.24312	ENSBTAG00000031890	46392481	46948728	DOCK1	protein_coding
QTL overlapped with the top 0.001% markers in percentage of variance explained
Chromosome	Marker	Start_SNP (marker)	END_SNP (marker)	Start_Position (marker)	End_Position (marker)	Size_in_kb(marker)	%Variance_explained	QTL_Type	Start_Position (QTL)	End_Position (QTL)	QTL_ID	Trait_associated	Trait_Abreviation	Breeds_found	Tag_SNP
7	block_113_chr_7	rs41605716	rs41580804	89523902	89546406	22504	0.27178	Exterior	89523900	89523904	QTL_ID=43369	trait=Dairy_form	Abbrev=DYF	breed=brahman	rs29025644,rs110378393
7	block_113_chr_7	rs41605716	rs41580804	89523902	89546406	22504	0.27178	Exterior	89523900	89523904	QTL_ID=43370	trait=Feet_and_leg_conformation	Abbrev=FTLEG	breed=charolais,chianina,gelbvieh,hereford,holstein,limousin,piedmontese,red_angus,simmental,Angus,Maine-Anjou	rs43643999,rs109559045
7	block_113_chr_7	rs41605716	rs41580804	89523902	89546406	22504	0.27178	Exterior	89523900	89523904	QTL_ID=43372	trait=Teat_placement_-_front	Abbrev=FTPL	breed=holstein	rs41656867,rs109989268
7	block_113_chr_7	rs41605716	rs41580804	89523902	89546406	22504	0.27178	Exterior	89523900	89523904	QTL_ID=43373	trait=Udder_attachment	Abbrev=UA	breed=holstein	rs43642998,rs43650173
7	block_113_chr_7	rs41605716	rs41580804	89523902	89546406	22504	0.27178	Exterior	89523900	89523904	QTL_ID=43374	trait=Rear_leg_placement_-_rear_view	Abbrev=RLEGR	breed=holstein	rs109914287,rs43650187
7	block_113_chr_7	rs41605716	rs41580804	89523902	89546406	22504	0.27178	Exterior	89523900	89523904	QTL_ID=43375	trait=Teat_placement_-_rear	Abbrev=RTPL	breed=charolais,chianina,gelbvieh,hereford,holstein,limousin,piedmontese,red_angus,simmental,Angus,Maine-Anjou	rs110179938,rs110169119
7	block_113_chr_7	rs41605716	rs41580804	89523902	89546406	22504	0.27178	Exterior	89523900	89523904	QTL_ID=43376	trait=Udder_height	Abbrev=UHT	breed=charolais,gelbvieh,hereford,limousin,pinzgauer,red_angus,red_poll,simmental,Angus	rs110201865,rs110056495
7	block_113_chr_7	rs41605716	rs41580804	89523902	89546406	22504	0.27178	Exterior	89523900	89523904	QTL_ID=43378	trait=Stature	Abbrev=STA	breed=charolais,gelbvieh,hereford,limousin,pinzgauer,red_angus,red_poll,simmental,Angus	rs43642675,rs43643308
7	block_113_chr_7	rs41605716	rs41580804	89523902	89546406	22504	0.27178	Exterior	89523900	89523904	QTL_ID=43379	trait=Strength	Abbrev=STR	breed=charolais,gelbvieh,hereford,limousin,pinzgauer,red_angus,red_poll,simmental,Angus	rs41593885,rs110566925
7	block_113_chr_7	rs41605716	rs41580804	89523902	89546406	22504	0.27178	Exterior	89523900	89523904	QTL_ID=43380	trait=Udder_cleft	Abbrev=UC	breed=holstein	rs43647828,rs42868836
7	block_113_chr_7	rs41605716	rs41580804	89523902	89546406	22504	0.27178	Exterior	89523900	89523904	QTL_ID=43381	trait=Udder_depth	Abbrev=UDPTH	breed=holstein	rs110584450,rs109103352
7	block_113_chr_7	rs41605716	rs41580804	89523902	89546406	22504	0.27178	Exterior	89546404	89546408	QTL_ID=43383	trait=Dairy_form	Abbrev=DYF	breed=holstein	rs132960291,rs110702652,rs136362611
7	block_113_chr_7	rs41605716	rs41580804	89523902	89546406	22504	0.27178	Exterior	89546404	89546408	QTL_ID=43384	trait=Feet_and_leg_conformation	Abbrev=FTLEG	breed=charolais,gelbvieh,hereford,limousin,pinzgauer,red_angus,red_poll,simmental,Angus	rs132960291,rs110702652,rs136362611
7	block_113_chr_7	rs41605716	rs41580804	89523902	89546406	22504	0.27178	Exterior	89546404	89546408	QTL_ID=43386	trait=Teat_placement_-_front	Abbrev=FTPL	breed=ayrshire,danish_red,holstein,jersey,norwegian_red,Swedish_Red-and-White	rs43619255,rs41655411,rs43614585
7	block_113_chr_7	rs41605716	rs41580804	89523902	89546406	22504	0.27178	Exterior	89546404	89546408	QTL_ID=43387	trait=Udder_attachment	Abbrev=UA	breed=holstein	rs135198463,rs41597142,rs136081666
7	block_113_chr_7	rs41605716	rs41580804	89523902	89546406	22504	0.27178	Exterior	89546404	89546408	QTL_ID=43388	trait=Rear_leg_placement_-_rear_view	Abbrev=RLEGR	breed=holstein	rs109898540
7	block_113_chr_7	rs41605716	rs41580804	89523902	89546406	22504	0.27178	Exterior	89546404	89546408	QTL_ID=43389	trait=Teat_placement_-_rear	Abbrev=RTPL	breed=holstein	rs109755494
7	block_113_chr_7	rs41605716	rs41580804	89523902	89546406	22504	0.27178	Exterior	89546404	89546408	QTL_ID=43390	trait=Udder_height	Abbrev=UHT	breed=holstein	rs109220955
7	block_113_chr_7	rs41605716	rs41580804	89523902	89546406	22504	0.27178	Exterior	89546404	89546408	QTL_ID=43392	trait=Stature	Abbrev=STA	breed=holstein	rs29022040
7	block_113_chr_7	rs41605716	rs41580804	89523902	89546406	22504	0.27178	Exterior	89546404	89546408	QTL_ID=43393	trait=Strength	Abbrev=STR	breed=holstein	rs137826123
7	block_113_chr_7	rs41605716	rs41580804	89523902	89546406	22504	0.27178	Exterior	89546404	89546408	QTL_ID=43394	trait=Udder_cleft	Abbrev=UC	breed=brahman	rs133252628
7	block_113_chr_7	rs41605716	rs41580804	89523902	89546406	22504	0.27178	Exterior	89546404	89546408	QTL_ID=43395	trait=Udder_depth	Abbrev=UDPTH	breed=brahman	rs137713131
7	block_113_chr_7	rs41605716	rs41580804	89523902	89546406	22504	0.27178	Production	89523900	89523904	QTL_ID=43368	trait=Body_depth	Abbrev=BD	breed=blonde_d'aquitaine	rs42802606,rs41656325
7	block_113_chr_7	rs41605716	rs41580804	89523902	89546406	22504	0.27178	Production	89523900	89523904	QTL_ID=43371	trait=PTA_type	Abbrev=PTAT	breed=charolais,chianina,gelbvieh,hereford,holstein,limousin,piedmontese,red_angus,simmental,Angus,Maine-Anjou	rs43642952,rs43637279
7	block_113_chr_7	rs41605716	rs41580804	89523902	89546406	22504	0.27178	Production	89523900	89523904	QTL_ID=43377	trait=Rump_width	Abbrev=RUMWD	breed=Angus	rs110838923,rs41594273
7	block_113_chr_7	rs41605716	rs41580804	89523902	89546406	22504	0.27178	Production	89546404	89546408	QTL_ID=43382	trait=Body_depth	Abbrev=BD	breed=holstein	rs43643837,rs42868892
7	block_113_chr_7	rs41605716	rs41580804	89523902	89546406	22504	0.27178	Production	89546404	89546408	QTL_ID=43385	trait=PTA_type	Abbrev=PTAT	breed=holstein	rs43619255,rs41655411,rs43614585
7	block_113_chr_7	rs41605716	rs41580804	89523902	89546406	22504	0.27178	Production	89546404	89546408	QTL_ID=43391	trait=Rump_width	Abbrev=RUMWD	breed=holstein	rs137527434
26	block_46_chr_26	rs110214513	rs42101711	46728033	46787804	59771	0.24312	Milk	46765746	46765750	QTL_ID=113783	trait=Milk_kappa-casein_percentage	Abbrev=MKCASP	breed=piedmontese
26	block_46_chr_26	rs110214513	rs42101711	46728033	46787804	59771	0.24312	Milk	46765746	46765750	QTL_ID=116938	trait=Milk_glycosylated_kappa-casein_percentage	Abbrev=MGKCASP	breed=charolais,hereford,limousin,simmental,Angus

## Sheet: Haplotypes_LD0.15_top_0.01%
Genes overlapped with the top 0.001% markers in percentage of variance explained
Chromosome	Marker	Start_SNP (marker)	END_SNP (marker)	Start_Position (marker)	End_Position (marker)	Size_in_kb(marker)	%Variance_explained	Ensembl_gene_ID	Start_Position (gene)	End_Position (gene)	Gene_name	Gene_type
1	block_14_chr_1	rs110593395	rs29024375	4250046	4309205	59159	0.05089	ENSBTAG00000017839	4192104	4358253	TIAM1	protein_coding
1	block_14_chr_1	rs110593395	rs29024375	4250046	4309205	59159	0.05089	ENSBTAG00000044299	4288068	4288144	bta-mir-2284i	miRNA
1	block_145_chr_1	rs42584386	rs41610345	45182041	45281490	99449	0.05118	ENSBTAG00000016363	45155599	45188354	TFG	protein_coding
1	block_145_chr_1	rs42584386	rs41610345	45182041	45281490	99449	0.05118	ENSBTAG00000026836	45273441	45477104	protein_coding
1	block_311_chr_1	rs42455329	rs41613169	91673661	91758979	85318	0.05254	ENSBTAG00000048493	91436009	92436553	NAALADL2	protein_coding
1	block_408_chr_1	rs109483880	rs29019947	116654067	116725563	71496	0.07161	ENSBTAG00000015837	116694941	116747192	P2RY12	protein_coding
1	block_408_chr_1	rs109483880	rs29019947	116654067	116725563	71496	0.07161	ENSBTAG00000021703	116654940	117017533	MED12L	protein_coding
1	block_577_chr_1	rs109668017	rs41617748	156644833	156682865	38032	0.06578	ENSBTAG00000012798	156340497	156841779	KCNH8	protein_coding
3	block_144_chr_3	rs43339412	rs110384429	48234094	48285929	51835	0.07392	ENSBTAG00000021537	48239823	48252404	RWDD3	protein_coding
3	block_320_chr_3	rs43350848	rs109726753	92054056	92123920	69864	0.05919	ENSBTAG00000020036	92081757	92090351	CDCP2	protein_coding
3	block_320_chr_3	rs43350848	rs109726753	92054056	92123920	69864	0.05919	ENSBTAG00000020037	92033900	92060024	CYB5RL	protein_coding
3	block_420_chr_3	rs110656886	rs42460993	113880893	113901073	20180	0.07112	ENSBTAG00000054838	113885085	113894870	lncRNA
3	block_452_chr_3	rs109475915	rs43370810	120380233	120402371	22138	0.05541	ENSBTAG00000000789	120373077	120389112	PPP1R7	protein_coding
4	block_46_chr_4	rs41659143	rs41659140	15935175	15961687	26512	0.08244	ENSBTAG00000043805	15943455	15943556	5S_rRNA	rRNA
4	block_46_chr_4	rs41659143	rs41659140	15935175	15961687	26512	0.08244	ENSBTAG00000047004	15734909	15991563	UMAD1	protein_coding
4	block_219_chr_4	rs43402375	rs43400956	61247646	61322228	74582	0.05941	ENSBTAG00000001182	61204174	61302729	SEPTIN7	protein_coding
4	block_219_chr_4	rs43402375	rs43400956	61247646	61322228	74582	0.05941	ENSBTAG00000051302	61259466	61259572	U6	snRNA
4	block_291_chr_4	rs41599805	rs41654185	80520587	80544515	23928	0.06319	ENSBTAG00000032121	80159127	80928936	SUGCT	protein_coding
5	block_92_chr_5	rs29002549	rs29003499	30184122	30204315	20193	0.05086	ENSBTAG00000016589	30202309	30240990	PRPF40B	protein_coding
5	block_92_chr_5	rs29002549	rs29003499	30184122	30204315	20193	0.05086	ENSBTAG00000016593	30151294	30202352	FMNL3	protein_coding
6	block_34_chr_6	rs43444992	rs41650750	7438139	7474743	36604	0.06035	ENSBTAG00000051854	7441167	7459597	lncRNA
6	block_99_chr_6	rs41633202	rs108944781	22571656	22681971	110315	0.06601	ENSBTAG00000054853	22648797	22649060	processed_pseudogene
6	block_451_chr_6	rs41574391	rs109657313	114785574	114812953	27379	0.05508	ENSBTAG00000014803	114791954	114816294	CPZ	protein_coding
7	block_61_chr_7	rs109815065	rs109755265	16688700	16720758	32058	0.0525	ENSBTAG00000000613	16714677	16752222	ELAVL1	protein_coding
7	block_61_chr_7	rs109815065	rs109755265	16688700	16720758	32058	0.0525	ENSBTAG00000015567	16680584	16695716	TIMM44	protein_coding
7	block_61_chr_7	rs109815065	rs109755265	16688700	16720758	32058	0.0525	ENSBTAG00000044869	16711356	16711431	bta-mir-2455	miRNA
7	block_61_chr_7	rs109815065	rs109755265	16688700	16720758	32058	0.0525	ENSBTAG00000049345	16712681	16712756	bta-mir-10178	miRNA
7	block_166_chr_7	rs41575808	rs109886610	43085607	43105247	19640	0.06461	ENSBTAG00000047560	43101617	43102879	C2CD4C	protein_coding
7	block_222_chr_7	rs110504063	rs41627905	59101278	59173723	72445	0.05396	ENSBTAG00000004153	59111440	59114995	SCGB3A2	protein_coding
7	block_222_chr_7	rs110504063	rs41627905	59101278	59173723	72445	0.05396	ENSBTAG00000015465	59134895	59147099	C7H5orf46	protein_coding
7	block_291_chr_7	rs41613284	rs109190810	75350671	75380152	29481	0.05965	ENSBTAG00000050903	75358284	75359460	protein_coding
9	block_188_chr_9	rs41575824	rs42411844	53639845	53659493	19648	0.08087	ENSBTAG00000007989	53645198	53646339	FUT9	protein_coding
10	block_392_chr_10	rs110572986	rs109837613	99680118	99710643	30525	0.071	ENSBTAG00000001124	99667901	99724558	GALC	protein_coding
11	block_70_chr_11	rs110341524	rs109073558	13441766	13510010	68244	0.07998	ENSBTAG00000010605	13482524	13508824	VAX2	protein_coding
11	block_70_chr_11	rs110341524	rs109073558	13441766	13510010	68244	0.07998	ENSBTAG00000010620	13454348	13480401	ATP6V1B1	protein_coding
11	block_70_chr_11	rs110341524	rs109073558	13441766	13510010	68244	0.07998	ENSBTAG00000010623	13434822	13442574	ANKRD53	protein_coding
11	block_70_chr_11	rs110341524	rs109073558	13441766	13510010	68244	0.07998	ENSBTAG00000051968	13509110	13509305	misc_RNA
14	block_105_chr_14	rs41570832	rs41614771	15454870	15481849	26979	0.0515	ENSBTAG00000020407	15383762	15553664	MTSS1	protein_coding
14	block_174_chr_14	rs41635435	rs41639945	30056908	30089537	32629	0.05343	ENSBTAG00000008629	30039506	30098890	MTFR1	protein_coding
14	block_199_chr_14	rs42382244	rs43089152	38274985	38304478	29493	0.07362	ENSBTAG00000004411	38295064	38345541	CRISPLD1	protein_coding
14	block_213_chr_14	rs43576496	rs41661153	41944778	41965713	20935	0.05695	ENSBTAG00000016284	41937221	41996546	IL7	protein_coding
15	block_291_chr_15	rs109488431	rs110136873	81149022	81172004	22982	0.05365	ENSBTAG00000047396	81148671	81149618	protein_coding
16	block_156_chr_16	rs41811813	rs109608399	41217175	41244707	27532	0.05262	ENSBTAG00000016080	41205338	41473842	VPS13D	protein_coding
16	block_342_chr_16	rs41664179	rs41664177	77631297	77660465	29168	0.05247	ENSBTAG00000023144	77600496	77669271	PTPRC	protein_coding
16	block_342_chr_16	rs41664179	rs41664177	77631297	77660465	29168	0.05247	ENSBTAG00000046345	77633793	77634326	protein_coding
17	block_169_chr_17	rs42763815	rs29016184	43388401	43422315	33914	0.05204	ENSBTAG00000011062	43386894	43403747	TDO2	protein_coding
17	block_231_chr_17	rs42948217	rs41843533	57652704	57676485	23781	0.05747	ENSBTAG00000044119	57231745	57664911	KSR2	protein_coding
18	block_6_chr_18	rs110151403	rs109766638	2132264	2159912	27648	0.08335	ENSBTAG00000012216	2123144	2146610	MLKL	protein_coding
18	block_6_chr_18	rs110151403	rs109766638	2132264	2159912	27648	0.08335	ENSBTAG00000012222	2151216	2205687	FA2H	protein_coding
18	block_172_chr_18	rs109074834	rs41581635	43300251	43332104	31853	0.06348	ENSBTAG00000004864	43316097	43398266	CEP89	protein_coding
19	block_25_chr_19	rs29018185	rs41600341	10668027	10691042	23015	0.05127	ENSBTAG00000011623	10674179	10802801	VMP1	protein_coding
19	block_25_chr_19	rs29018185	rs41600341	10668027	10691042	23015	0.05127	ENSBTAG00000016710	10665274	10674104	PTRH2	protein_coding
19	block_159_chr_19	rs43729464	rs29015754	41594056	41619572	25516	0.07	ENSBTAG00000013685	41614120	41619258	KRT31	protein_coding
19	block_159_chr_19	rs43729464	rs29015754	41594056	41619572	25516	0.07	ENSBTAG00000037560	41593205	41597632	KRT34	protein_coding
20	block_143_chr_20	rs42543872	rs42543895	38543545	38571692	28147	0.0897	ENSBTAG00000023529	38369475	38572090	SPEF2	protein_coding
22	block_166_chr_22	rs41644452	rs42013343	46740639	46762508	21869	0.07392	ENSBTAG00000013117	45924535	46818511	CACNA2D3	protein_coding
22	block_244_chr_22	rs110904383	rs109051741	60225202	60258838	33636	0.09592	ENSBTAG00000009159	60240226	60280068	PLXNA1	protein_coding
23	block_19_chr_23	rs110708312	rs109793138	4861885	4892090	30205	0.06328	ENSBTAG00000025718	4789382	4986934	HMGCLL1	protein_coding
23	block_59_chr_23	rs109152735	rs109130384	15338295	15367501	29206	0.09398	ENSBTAG00000014211	15366276	15417429	FOXP4	protein_coding
24	block_236_chr_24	rs110717504	rs110870395	60093951	60176845	82894	0.05239	ENSBTAG00000001739	59887828	60100758	CDH20	protein_coding
26	block_26_chr_26	rs110924756	rs110358830	9836117	9867428	31311	0.05347	ENSBTAG00000048748	9806435	9850770	lncRNA
26	block_47_chr_26	rs109184928	rs109653528	14684949	14710058	25109	0.05565	ENSBTAG00000016918	14623780	14803157	MYOF	protein_coding
26	block_60_chr_26	rs42084620	rs41606817	17606022	17628730	22708	0.05464	ENSBTAG00000021358	17515994	17644805	BLNK	protein_coding
26	block_100_chr_26	rs41604819	rs41636627	27902998	27933010	30012	0.06003	ENSBTAG00000007948	27553353	27912060	SORCS1	protein_coding
26	block_137_chr_26	rs109875268	rs110822681	37010533	37042629	32096	0.0601	ENSBTAG00000000765	37019951	37039831	PNLIPRP2	protein_coding
26	block_187_chr_26	rs109450346	rs42101711	46765748	46787804	22056	0.06642	ENSBTAG00000031890	46392481	46948728	DOCK1	protein_coding
26	block_193_chr_26	rs110105463	rs111008529	48859017	48880894	21877	0.06368	ENSBTAG00000050386	48818674	49095122	MGMT	protein_coding
26	block_199_chr_26	rs109629359	rs42500277	50846722	50879471	32749	0.0514	ENSBTAG00000019919	50822833	50865778	protein_coding
27	block_26_chr_27	rs42437286	rs42439066	8639941	8672918	32977	0.07189	ENSBTAG00000049151	8664638	8667964	lncRNA
28	block_98_chr_28	rs41606880	rs110462383	24274916	24372375	97459	0.05646	ENSBTAG00000010932	24248418	24296594	DNAJC12	protein_coding
28	block_98_chr_28	rs41606880	rs110462383	24274916	24372375	97459	0.05646	ENSBTAG00000051268	24329477	24332103	protein_coding
28	block_156_chr_28	rs42150562	rs41646393	37128017	37155974	27957	0.0549	ENSBTAG00000009587	36896430	38132186	NRG3	protein_coding
28	block_162_chr_28	rs109982860	rs41615110	37709725	37747210	37485	0.07595	ENSBTAG00000009587	36896430	38132186	NRG3	protein_coding
29	block_75_chr_29	rs41575769	rs29021971	24098223	24117260	19037	0.09894	ENSBTAG00000048576	24002708	24295209	protein_coding
QTL overlapped with the top 0.001% markers in percentage of variance explained
Chromosome	Marker	Start_SNP (marker)	END_SNP (marker)	Start_Position (marker)	End_Position (marker)	Size_in_kb(marker)	%Variance_explained	QTL_Type	Start_Position (QTL)	End_Position (QTL)	QTL_ID	Trait_associated	Trait_Abreviation	Breeds_found	Tag_SNP
1	block_14_chr_1	rs110593395	rs29024375	4250046	4309205	59159	0.05089	Production	4250044	4250048	QTL_ID=66725	trait=Body_weight_(yearling)	Abbrev=W365	breed=Hanwoo	rs378493804
1	block_14_chr_1	rs110593395	rs29024375	4250046	4309205	59159	0.05089	Production	4276063	4276067	QTL_ID=66789	trait=Body_weight_(yearling)	Abbrev=W365	breed=charolais	rs43212771
1	block_14_chr_1	rs110593395	rs29024375	4250046	4309205	59159	0.05089	Reproduction	4253948	4253952	QTL_ID=176659	trait=First_service_conception	Abbrev=FSC	breed=holstein	rs132784449
1	block_14_chr_1	rs110593395	rs29024375	4250046	4309205	59159	0.05089	Reproduction	4253948	4253952	QTL_ID=176888	trait=First_service_conception	Abbrev=FSC	breed=holstein	rs43211381,rs41633082
1	block_14_chr_1	rs110593395	rs29024375	4250046	4309205	59159	0.05089	Reproduction	4253948	4253952	QTL_ID=212069	trait=First_service_conception	Abbrev=FSC	breed=blonde_d'aquitaine	rs43765148,rs109811373,rs43210941
1	block_14_chr_1	rs110593395	rs29024375	4250046	4309205	59159	0.05089	Reproduction	4253948	4253952	QTL_ID=212416	trait=Inseminations_per_conception	Abbrev=CONCEPT	breed=holstein	rs41614480
1	block_311_chr_1	rs42455329	rs41613169	91673661	91758979	85318	0.05254	Health	91727149	91727153	QTL_ID=95654	trait=Bovine_respiratory_disease_susceptibility	Abbrev=BRDS	breed=holstein	rs29023726
1	block_311_chr_1	rs42455329	rs41613169	91673661	91758979	85318	0.05254	Production	91706586	91706590	QTL_ID=66781	trait=Body_weight_(yearling)	Abbrev=W365	breed=holstein	rs41638858
1	block_311_chr_1	rs42455329	rs41613169	91673661	91758979	85318	0.05254	Production	91706586	91706590	QTL_ID=66782	trait=Body_weight_gain	Abbrev=BWG	breed=holstein	rs29015093
1	block_392_chr_1	rs41632723	rs41751194	111566373	111654919	88546	0.07455	Milk	111577411	111577415	QTL_ID=155361	trait=Milk_caproic_acid_content	Abbrev=MFA-C6:0	breed=Valdostana_Red_Pied	rs42746298
1	block_392_chr_1	rs41632723	rs41751194	111566373	111654919	88546	0.07455	Milk	111577411	111577415	QTL_ID=155514	trait=Milk_caprylic_acid_content	Abbrev=MFA-C8:0	breed=holstein	rs42746298
1	block_392_chr_1	rs41632723	rs41751194	111566373	111654919	88546	0.07455	Production	111654917	111654921	QTL_ID=20986	trait=Average_daily_feed_intake	Abbrev=ADFI	breed=holstein	rs43236849
1	block_408_chr_1	rs109483880	rs29019947	116654067	116725563	71496	0.07161	Reproduction	116678367	116678371	QTL_ID=212443	trait=Inseminations_per_conception	Abbrev=CONCEPT	breed=holstein	rs137041533
1	block_577_chr_1	rs109668017	rs41617748	156644833	156682865	38032	0.06578	Milk	156682863	156682867	QTL_ID=25762	trait=Milk_fat_yield	Abbrev=FY	breed=jersey	rs43276300
2	block_410_chr_2	rs110177119	rs41598273	116395928	116423023	27095	0.06815	Milk	116423021	116423025	QTL_ID=69756	trait=Milk_zinc_content	Abbrev=MZN	breed=holstein	rs109395536
3	block_108_chr_3	rs109542056	rs29012800	35139604	35171112	31508	0.06322	Exterior	35139602	35139606	QTL_ID=28109	trait=Dairy_form	Abbrev=DYF	breed=holstein	rs43101620,rs110769771
3	block_108_chr_3	rs109542056	rs29012800	35139604	35171112	31508	0.06322	Exterior	35139602	35139606	QTL_ID=28112	trait=Angularity	Abbrev=ANG	breed=holstein	rs109050772,rs42634055
3	block_137_chr_3	rs41624161	rs42967999	46986210	47013530	27320	0.10199	Exterior	47013528	47013532	QTL_ID=39799	trait=Rump_angle	Abbrev=RANG	breed=holstein	rs109460728
3	block_137_chr_3	rs41624161	rs42967999	46986210	47013530	27320	0.10199	Milk	47013528	47013532	QTL_ID=39795	trait=Milk_fat_yield	Abbrev=FY	breed=holstein	rs109460728
3	block_137_chr_3	rs41624161	rs42967999	46986210	47013530	27320	0.10199	Milk	47013528	47013532	QTL_ID=39796	trait=Milk_yield	Abbrev=MY	breed=holstein	rs109460728
3	block_137_chr_3	rs41624161	rs42967999	46986210	47013530	27320	0.10199	Milk	47013528	47013532	QTL_ID=39798	trait=Milk_protein_yield	Abbrev=PY	breed=holstein	rs109460728
3	block_137_chr_3	rs41624161	rs42967999	46986210	47013530	27320	0.10199	Milk	.	.	QTL_ID=105587	trait=Milk_protein_percentage	Abbrev=PP	breed=charolais,chianina,gelbvieh,hereford,holstein,limousin,piedmontese,red_angus,simmental,Angus,Maine-Anjou	rs42967999
3	block_137_chr_3	rs41624161	rs42967999	46986210	47013530	27320	0.10199	Production	47013528	47013532	QTL_ID=39797	trait=Net_merit	Abbrev=NM	breed=holstein	rs109460728
3	block_137_chr_3	rs41624161	rs42967999	46986210	47013530	27320	0.10199	Production	.	.	QTL_ID=5321	trait=Residual_feed_intake	Abbrev=RFI	breed=holstein	rs42967999
3	block_137_chr_3	rs41624161	rs42967999	46986210	47013530	27320	0.10199	Reproduction	47013528	47013532	QTL_ID=39794	trait=Calving_ease_(maternal)	Abbrev=CALEASE	breed=holstein	rs109460728
3	block_137_chr_3	rs41624161	rs42967999	46986210	47013530	27320	0.10199	Reproduction	47013528	47013532	QTL_ID=39800	trait=Calving_ease	Abbrev=CALEASE	breed=holstein	rs109460728
3	block_144_chr_3	rs43339412	rs110384429	48234094	48285929	51835	0.07392	Production	48234092	48234096	QTL_ID=164356	trait=Body_weight_(birth)	Abbrev=BW	breed=holstein	rs41596889
3	block_320_chr_3	rs43350848	rs109726753	92054056	92123920	69864	0.05919	Reproduction	92058004	92058008	QTL_ID=121566	trait=Luteal_activity	Abbrev=LUTACT	breed=holstein	rs137353877
3	block_320_chr_3	rs43350848	rs109726753	92054056	92123920	69864	0.05919	Reproduction	92060611	92060615	QTL_ID=121458	trait=Luteal_activity	Abbrev=LUTACT	breed=Angus	rs439093722
3	block_320_chr_3	rs43350848	rs109726753	92054056	92123920	69864	0.05919	Reproduction	92064952	92064956	QTL_ID=121575	trait=Luteal_activity	Abbrev=LUTACT	breed=holstein	rs41587368
3	block_320_chr_3	rs43350848	rs109726753	92054056	92123920	69864	0.05919	Reproduction	92066101	92066105	QTL_ID=121506	trait=Luteal_activity	Abbrev=LUTACT	breed=holstein	rs465686780
3	block_320_chr_3	rs43350848	rs109726753	92054056	92123920	69864	0.05919	Reproduction	92066715	92066719	QTL_ID=121007	trait=Luteal_activity	Abbrev=LUTACT	breed=holstein	rs136396728
3	block_320_chr_3	rs43350848	rs109726753	92054056	92123920	69864	0.05919	Reproduction	92066883	92066887	QTL_ID=120927	trait=Luteal_activity	Abbrev=LUTACT	breed=holstein	rs109530280
3	block_320_chr_3	rs43350848	rs109726753	92054056	92123920	69864	0.05919	Reproduction	92070056	92070060	QTL_ID=120972	trait=Luteal_activity	Abbrev=LUTACT	breed=holstein	rs43367040
3	block_320_chr_3	rs43350848	rs109726753	92054056	92123920	69864	0.05919	Reproduction	92070696	92070700	QTL_ID=121155	trait=Luteal_activity	Abbrev=LUTACT	breed=holstein	rs136798183
3	block_320_chr_3	rs43350848	rs109726753	92054056	92123920	69864	0.05919	Reproduction	92070701	92070705	QTL_ID=120903	trait=Luteal_activity	Abbrev=LUTACT	breed=holstein	rs134311964
3	block_320_chr_3	rs43350848	rs109726753	92054056	92123920	69864	0.05919	Reproduction	92082465	92082469	QTL_ID=120932	trait=Luteal_activity	Abbrev=LUTACT	breed=holstein	rs133200096
3	block_320_chr_3	rs43350848	rs109726753	92054056	92123920	69864	0.05919	Reproduction	92082795	92082799	QTL_ID=121201	trait=Luteal_activity	Abbrev=LUTACT	breed=holstein	rs480285530
3	block_320_chr_3	rs43350848	rs109726753	92054056	92123920	69864	0.05919	Reproduction	92085385	92085389	QTL_ID=121535	trait=Luteal_activity	Abbrev=LUTACT	breed=holstein	rs110228865
3	block_320_chr_3	rs43350848	rs109726753	92054056	92123920	69864	0.05919	Reproduction	92092067	92092071	QTL_ID=106921	trait=Daughter_pregnancy_rate	Abbrev=DPR	breed=holstein	rs109977837
3	block_320_chr_3	rs43350848	rs109726753	92054056	92123920	69864	0.05919	Reproduction	92102204	92102208	QTL_ID=121021	trait=Luteal_activity	Abbrev=LUTACT	breed=holstein	rs109977837
3	block_420_chr_3	rs110656886	rs42460993	113880893	113901073	20180	0.07112	Milk	113884234	113884238	QTL_ID=64006	trait=Milk_riboflavin_content	Abbrev=RIBO	breed=holstein	rs41649818,rs29011657
3	block_420_chr_3	rs110656886	rs42460993	113880893	113901073	20180	0.07112	Milk	113889410	113889414	QTL_ID=64007	trait=Milk_riboflavin_content	Abbrev=RIBO	breed=holstein	rs134458891,rs136801407
4	block_87_chr_4	rs29013539	rs41653992	26796377	26854185	57808	0.08077	Milk	26854183	26854187	QTL_ID=26726	trait=Milk_protein_percentage	Abbrev=PP	breed=holstein	rs110562779
4	block_219_chr_4	rs43402375	rs43400956	61247646	61322228	74582	0.05941	Production	61322226	61322230	QTL_ID=24712	trait=Body_weight_(weaning)	Abbrev=WWT	breed=holstein	rs434336014
4	block_219_chr_4	rs43402375	rs43400956	61247646	61322228	74582	0.05941	Production	61322226	61322230	QTL_ID=24781	trait=Body_weight_(yearling)	Abbrev=W365	breed=German_Black_Pied	rs29012226
5	block_92_chr_5	rs29002549	rs29003499	30184122	30204315	20193	0.05086	Production	30184901	30184905	QTL_ID=122667	trait=Length_of_productive_life	Abbrev=PL	breed=holstein	rs136538217
5	block_92_chr_5	rs29002549	rs29003499	30184122	30204315	20193	0.05086	Production	30184901	30184905	QTL_ID=123355	trait=Length_of_productive_life	Abbrev=PL	breed=holstein	rs136216231
5	block_92_chr_5	rs29002549	rs29003499	30184122	30204315	20193	0.05086	Production	30189136	30189140	QTL_ID=122668	trait=Length_of_productive_life	Abbrev=PL	breed=holstein	rs110351880
5	block_92_chr_5	rs29002549	rs29003499	30184122	30204315	20193	0.05086	Production	30189136	30189140	QTL_ID=123356	trait=Length_of_productive_life	Abbrev=PL	breed=holstein	rs137424743
5	block_92_chr_5	rs29002549	rs29003499	30184122	30204315	20193	0.05086	Production	30196333	30196337	QTL_ID=122669	trait=Length_of_productive_life	Abbrev=PL	breed=holstein	rs135842805
5	block_92_chr_5	rs29002549	rs29003499	30184122	30204315	20193	0.05086	Production	30196333	30196337	QTL_ID=123357	trait=Length_of_productive_life	Abbrev=PL	breed=holstein	rs109203511
5	block_92_chr_5	rs29002549	rs29003499	30184122	30204315	20193	0.05086	Production	30202419	30202423	QTL_ID=122670	trait=Length_of_productive_life	Abbrev=PL	breed=holstein	rs133689198
5	block_92_chr_5	rs29002549	rs29003499	30184122	30204315	20193	0.05086	Production	30202419	30202423	QTL_ID=123358	trait=Length_of_productive_life	Abbrev=PL	breed=holstein	rs135373021
5	block_92_chr_5	rs29002549	rs29003499	30184122	30204315	20193	0.05086	Reproduction	30184120	30184124	QTL_ID=30147	trait=Interval_to_first_estrus_after_calving	Abbrev=CALEST	breed=holstein	rs109774980
5	block_92_chr_5	rs29002549	rs29003499	30184122	30204315	20193	0.05086	Reproduction	30184120	30184124	QTL_ID=30382	trait=Interval_to_first_estrus_after_calving	Abbrev=CALEST	breed=holstein	rs109903159
5	block_92_chr_5	rs29002549	rs29003499	30184122	30204315	20193	0.05086	Reproduction	30204313	30204317	QTL_ID=30171	trait=Interval_to_first_estrus_after_calving	Abbrev=CALEST	breed=holstein	rs110049706
5	block_92_chr_5	rs29002549	rs29003499	30184122	30204315	20193	0.05086	Reproduction	30204313	30204317	QTL_ID=30409	trait=Interval_to_first_estrus_after_calving	Abbrev=CALEST	breed=holstein	rs110029418
6	block_4_chr_6	rs110710192	rs41663389	641260	670124	28864	0.06235	Exterior	641258	641262	QTL_ID=41728	trait=Feet_and_leg_conformation	Abbrev=FTLEG	breed=Angus	rs135314769
6	block_4_chr_6	rs110710192	rs41663389	641260	670124	28864	0.06235	Exterior	641258	641262	QTL_ID=41731	trait=Teat_placement_-_front	Abbrev=FTPL	breed=gelbvieh	rs135411900
6	block_4_chr_6	rs110710192	rs41663389	641260	670124	28864	0.06235	Exterior	641258	641262	QTL_ID=41732	trait=Udder_attachment	Abbrev=UA	breed=gelbvieh	rs135640023
6	block_4_chr_6	rs110710192	rs41663389	641260	670124	28864	0.06235	Exterior	641258	641262	QTL_ID=41737	trait=Rear_leg_placement_-_rear_view	Abbrev=RLEGR	breed=gelbvieh	rs136137849
6	block_4_chr_6	rs110710192	rs41663389	641260	670124	28864	0.06235	Exterior	641258	641262	QTL_ID=41738	trait=Teat_placement_-_rear	Abbrev=RTPL	breed=charolais,gelbvieh,hereford,limousin,pinzgauer,red_angus,red_poll,simmental,Angus	rs136190942
6	block_4_chr_6	rs110710192	rs41663389	641260	670124	28864	0.06235	Exterior	641258	641262	QTL_ID=41739	trait=Udder_height	Abbrev=UHT	breed=charolais,gelbvieh,hereford,limousin,pinzgauer,red_angus,red_poll,simmental,Angus	rs136257809
6	block_4_chr_6	rs110710192	rs41663389	641260	670124	28864	0.06235	Exterior	641258	641262	QTL_ID=41741	trait=Stature	Abbrev=STA	breed=charolais,gelbvieh,hereford,limousin,pinzgauer,red_angus,red_poll,simmental,Angus	rs136413048
6	block_4_chr_6	rs110710192	rs41663389	641260	670124	28864	0.06235	Exterior	641258	641262	QTL_ID=41742	trait=Strength	Abbrev=STR	breed=charolais,gelbvieh,hereford,limousin,pinzgauer,red_angus,red_poll,simmental,Angus	rs136416413
6	block_4_chr_6	rs110710192	rs41663389	641260	670124	28864	0.06235	Exterior	641258	641262	QTL_ID=41743	trait=Udder_depth	Abbrev=UDPTH	breed=Girolando	rs136523990
6	block_4_chr_6	rs110710192	rs41663389	641260	670124	28864	0.06235	Milk	641258	641262	QTL_ID=41729	trait=Milk_fat_percentage	Abbrev=FP	breed=holstein	rs135384060
6	block_4_chr_6	rs110710192	rs41663389	641260	670124	28864	0.06235	Milk	641258	641262	QTL_ID=41733	trait=Milk_fat_yield	Abbrev=FY	breed=charolais,gelbvieh,hereford,limousin,pinzgauer,red_angus,red_poll,simmental,Angus	rs135680544
6	block_4_chr_6	rs110710192	rs41663389	641260	670124	28864	0.06235	Milk	641258	641262	QTL_ID=41735	trait=Milk_protein_percentage	Abbrev=PP	breed=holstein	rs135922395
6	block_4_chr_6	rs110710192	rs41663389	641260	670124	28864	0.06235	Milk	641258	641262	QTL_ID=41736	trait=Milk_protein_yield	Abbrev=PY	breed=gelbvieh	rs135937048
6	block_4_chr_6	rs110710192	rs41663389	641260	670124	28864	0.06235	Production	641258	641262	QTL_ID=41726	trait=Body_depth	Abbrev=BD	breed=Hanwoo	rs135125616
6	block_4_chr_6	rs110710192	rs41663389	641260	670124	28864	0.06235	Production	641258	641262	QTL_ID=41730	trait=PTA_type	Abbrev=PTAT	breed=Angus	rs135400595
6	block_4_chr_6	rs110710192	rs41663389	641260	670124	28864	0.06235	Production	641258	641262	QTL_ID=41734	trait=Net_merit	Abbrev=NM	breed=charolais,gelbvieh,hereford,limousin,pinzgauer,red_angus,red_poll,simmental,Angus	rs135688682
6	block_4_chr_6	rs110710192	rs41663389	641260	670124	28864	0.06235	Production	641258	641262	QTL_ID=41740	trait=Rump_width	Abbrev=RUMWD	breed=charolais,gelbvieh,hereford,limousin,pinzgauer,red_angus,red_poll,simmental,Angus	rs136283820
6	block_4_chr_6	rs110710192	rs41663389	641260	670124	28864	0.06235	Reproduction	641258	641262	QTL_ID=41727	trait=Calving_ease_(maternal)	Abbrev=CALEASE	breed=brangus	rs135147861
6	block_34_chr_6	rs43444992	rs41650750	7438139	7474743	36604	0.06035	Reproduction	7448713	7448717	QTL_ID=181217	trait=Conception_rate	Abbrev=CONCRATE	breed=charolais,gelbvieh,hereford,limousin,simmental,Angus	rs137493341
6	block_34_chr_6	rs43444992	rs41650750	7438139	7474743	36604	0.06035	Reproduction	7448713	7448717	QTL_ID=181464	trait=Inseminations_per_conception	Abbrev=CONCEPT	breed=charolais,gelbvieh,hereford,limousin,simmental,Angus	rs137562559
6	block_190_chr_6	rs109134234	rs41652042	45135036	45156602	21566	0.06738	Production	45135034	45135038	QTL_ID=67176	trait=Body_weight_(birth)	Abbrev=BW	breed=holstein	rs110694171
6	block_190_chr_6	rs109134234	rs41652042	45135036	45156602	21566	0.06738	Production	45135034	45135038	QTL_ID=67177	trait=Body_weight_(yearling)	Abbrev=W365	breed=holstein	rs110855129
6	block_190_chr_6	rs109134234	rs41652042	45135036	45156602	21566	0.06738	Production	45135034	45135038	QTL_ID=67178	trait=Body_weight_gain	Abbrev=BWG	breed=holstein	rs110292608
6	block_190_chr_6	rs109134234	rs41652042	45135036	45156602	21566	0.06738	Production	45156600	45156604	QTL_ID=66530	trait=Body_weight_(birth)	Abbrev=BW	breed=holstein	rs109353886
6	block_190_chr_6	rs109134234	rs41652042	45135036	45156602	21566	0.06738	Production	45156600	45156604	QTL_ID=67607	trait=Body_weight_(yearling)	Abbrev=W365	breed=holstein	rs109353886
6	block_190_chr_6	rs109134234	rs41652042	45135036	45156602	21566	0.06738	Production	45156600	45156604	QTL_ID=67608	trait=Body_weight_gain	Abbrev=BWG	breed=holstein	rs109318073
6	block_451_chr_6	rs41574391	rs109657313	114785574	114812953	27379	0.05508	Production	114785572	114785576	QTL_ID=67490	trait=Body_weight_gain	Abbrev=BWG	breed=holstein	rs110834258
7	block_61_chr_7	rs109815065	rs109755265	16688700	16720758	32058	0.0525	Milk	16688698	16688702	QTL_ID=157440	trait=Milking_speed	Abbrev=MSPD	breed=Angus	rs137135090
7	block_166_chr_7	rs41575808	rs109886610	43085607	43105247	19640	0.06461	Milk	43085605	43085609	QTL_ID=157531	trait=Milking_speed	Abbrev=MSPD	breed=holstein	rs41611219
7	block_222_chr_7	rs110504063	rs41627905	59101278	59173723	72445	0.05396	Exterior	59124348	59124352	QTL_ID=43157	trait=Foot_angle	Abbrev=FANG	breed=holstein	rs41572471
7	block_222_chr_7	rs110504063	rs41627905	59101278	59173723	72445	0.05396	Exterior	59124348	59124352	QTL_ID=43158	trait=Feet_and_leg_conformation	Abbrev=FTLEG	breed=holstein	rs41912461
7	block_222_chr_7	rs110504063	rs41627905	59101278	59173723	72445	0.05396	Exterior	59124348	59124352	QTL_ID=43161	trait=Udder_attachment	Abbrev=UA	breed=holstein	BMS434,BMS434,BMC701
7	block_222_chr_7	rs110504063	rs41627905	59101278	59173723	72445	0.05396	Exterior	59124348	59124352	QTL_ID=43167	trait=Rear_leg_placement_-_rear_view	Abbrev=RLEGR	breed=Angus	rs42329937
7	block_222_chr_7	rs110504063	rs41627905	59101278	59173723	72445	0.05396	Exterior	59124348	59124352	QTL_ID=43171	trait=Stature	Abbrev=STA	breed=holstein	rs41611327
7	block_222_chr_7	rs110504063	rs41627905	59101278	59173723	72445	0.05396	Exterior	59124348	59124352	QTL_ID=43172	trait=Strength	Abbrev=STR	breed=holstein	rs42332072
7	block_222_chr_7	rs110504063	rs41627905	59101278	59173723	72445	0.05396	Exterior	59124348	59124352	QTL_ID=43173	trait=Udder_depth	Abbrev=UDPTH	breed=holstein	rs42332072
7	block_222_chr_7	rs110504063	rs41627905	59101278	59173723	72445	0.05396	Health	59124348	59124352	QTL_ID=43169	trait=Somatic_cell_score	Abbrev=SCS	breed=simmental	rs136138837
7	block_222_chr_7	rs110504063	rs41627905	59101278	59173723	72445	0.05396	Milk	59124348	59124352	QTL_ID=157619	trait=Milking_speed	Abbrev=MSPD	breed=holstein	rs29023608
7	block_222_chr_7	rs110504063	rs41627905	59101278	59173723	72445	0.05396	Milk	59124348	59124352	QTL_ID=43159	trait=Milk_fat_percentage	Abbrev=FP	breed=holstein	rs134163758
7	block_222_chr_7	rs110504063	rs41627905	59101278	59173723	72445	0.05396	Milk	59124348	59124352	QTL_ID=43162	trait=Milk_fat_yield	Abbrev=FY	breed=Girolando	rs41606134
7	block_222_chr_7	rs110504063	rs41627905	59101278	59173723	72445	0.05396	Milk	59124348	59124352	QTL_ID=43165	trait=Milk_protein_percentage	Abbrev=PP	breed=nelore	CSSM056
7	block_222_chr_7	rs110504063	rs41627905	59101278	59173723	72445	0.05396	Milk	59124348	59124352	QTL_ID=43166	trait=Milk_protein_yield	Abbrev=PY	breed=Angus	CSSM056
7	block_222_chr_7	rs110504063	rs41627905	59101278	59173723	72445	0.05396	Production	59124348	59124352	QTL_ID=43154	trait=Body_depth	Abbrev=BD	breed=holstein	rs136330197
7	block_222_chr_7	rs110504063	rs41627905	59101278	59173723	72445	0.05396	Production	59124348	59124352	QTL_ID=43160	trait=PTA_type	Abbrev=PTAT	breed=holstein	BMS434,BMS434,BMC701
7	block_222_chr_7	rs110504063	rs41627905	59101278	59173723	72445	0.05396	Production	59124348	59124352	QTL_ID=43163	trait=Net_merit	Abbrev=NM	breed=holstein	rs41606134
7	block_222_chr_7	rs110504063	rs41627905	59101278	59173723	72445	0.05396	Production	59124348	59124352	QTL_ID=43164	trait=Length_of_productive_life	Abbrev=PL	breed=Angus	rs43161714
7	block_222_chr_7	rs110504063	rs41627905	59101278	59173723	72445	0.05396	Reproduction	59124348	59124352	QTL_ID=43155	trait=Calving_ease_(maternal)	Abbrev=CALEASE	breed=holstein	rs133125776
7	block_222_chr_7	rs110504063	rs41627905	59101278	59173723	72445	0.05396	Reproduction	59124348	59124352	QTL_ID=43156	trait=Daughter_pregnancy_rate	Abbrev=DPR	breed=holstein	rs137060698
7	block_222_chr_7	rs110504063	rs41627905	59101278	59173723	72445	0.05396	Reproduction	59124348	59124352	QTL_ID=43168	trait=Calving_ease	Abbrev=CALEASE	breed=simmental	rs42336518
7	block_222_chr_7	rs110504063	rs41627905	59101278	59173723	72445	0.05396	Reproduction	59124348	59124352	QTL_ID=43170	trait=Stillbirth	Abbrev=SB	breed=holstein	ILSTS013,BMS1724
7	block_342_chr_7	rs41605716	rs41580804	89523902	89546406	22504	0.07639	Exterior	89523900	89523904	QTL_ID=43369	trait=Dairy_form	Abbrev=DYF	breed=brahman	rs29025644,rs110378393
7	block_342_chr_7	rs41605716	rs41580804	89523902	89546406	22504	0.07639	Exterior	89523900	89523904	QTL_ID=43370	trait=Feet_and_leg_conformation	Abbrev=FTLEG	breed=charolais,chianina,gelbvieh,hereford,holstein,limousin,piedmontese,red_angus,simmental,Angus,Maine-Anjou	rs43643999,rs109559045
7	block_342_chr_7	rs41605716	rs41580804	89523902	89546406	22504	0.07639	Exterior	89523900	89523904	QTL_ID=43372	trait=Teat_placement_-_front	Abbrev=FTPL	breed=holstein	rs41656867,rs109989268
7	block_342_chr_7	rs41605716	rs41580804	89523902	89546406	22504	0.07639	Exterior	89523900	89523904	QTL_ID=43373	trait=Udder_attachment	Abbrev=UA	breed=holstein	rs43642998,rs43650173
7	block_342_chr_7	rs41605716	rs41580804	89523902	89546406	22504	0.07639	Exterior	89523900	89523904	QTL_ID=43374	trait=Rear_leg_placement_-_rear_view	Abbrev=RLEGR	breed=holstein	rs109914287,rs43650187
7	block_342_chr_7	rs41605716	rs41580804	89523902	89546406	22504	0.07639	Exterior	89523900	89523904	QTL_ID=43375	trait=Teat_placement_-_rear	Abbrev=RTPL	breed=charolais,chianina,gelbvieh,hereford,holstein,limousin,piedmontese,red_angus,simmental,Angus,Maine-Anjou	rs110179938,rs110169119
7	block_342_chr_7	rs41605716	rs41580804	89523902	89546406	22504	0.07639	Exterior	89523900	89523904	QTL_ID=43376	trait=Udder_height	Abbrev=UHT	breed=charolais,gelbvieh,hereford,limousin,pinzgauer,red_angus,red_poll,simmental,Angus	rs110201865,rs110056495
7	block_342_chr_7	rs41605716	rs41580804	89523902	89546406	22504	0.07639	Exterior	89523900	89523904	QTL_ID=43378	trait=Stature	Abbrev=STA	breed=charolais,gelbvieh,hereford,limousin,pinzgauer,red_angus,red_poll,simmental,Angus	rs43642675,rs43643308
7	block_342_chr_7	rs41605716	rs41580804	89523902	89546406	22504	0.07639	Exterior	89523900	89523904	QTL_ID=43379	trait=Strength	Abbrev=STR	breed=charolais,gelbvieh,hereford,limousin,pinzgauer,red_angus,red_poll,simmental,Angus	rs41593885,rs110566925
7	block_342_chr_7	rs41605716	rs41580804	89523902	89546406	22504	0.07639	Exterior	89523900	89523904	QTL_ID=43380	trait=Udder_cleft	Abbrev=UC	breed=holstein	rs43647828,rs42868836
7	block_342_chr_7	rs41605716	rs41580804	89523902	89546406	22504	0.07639	Exterior	89523900	89523904	QTL_ID=43381	trait=Udder_depth	Abbrev=UDPTH	breed=holstein	rs110584450,rs109103352
7	block_342_chr_7	rs41605716	rs41580804	89523902	89546406	22504	0.07639	Exterior	89546404	89546408	QTL_ID=43383	trait=Dairy_form	Abbrev=DYF	breed=holstein	rs132960291,rs110702652,rs136362611
7	block_342_chr_7	rs41605716	rs41580804	89523902	89546406	22504	0.07639	Exterior	89546404	89546408	QTL_ID=43384	trait=Feet_and_leg_conformation	Abbrev=FTLEG	breed=charolais,gelbvieh,hereford,limousin,pinzgauer,red_angus,red_poll,simmental,Angus	rs132960291,rs110702652,rs136362611
7	block_342_chr_7	rs41605716	rs41580804	89523902	89546406	22504	0.07639	Exterior	89546404	89546408	QTL_ID=43386	trait=Teat_placement_-_front	Abbrev=FTPL	breed=ayrshire,danish_red,holstein,jersey,norwegian_red,Swedish_Red-and-White	rs43619255,rs41655411,rs43614585
7	block_342_chr_7	rs41605716	rs41580804	89523902	89546406	22504	0.07639	Exterior	89546404	89546408	QTL_ID=43387	trait=Udder_attachment	Abbrev=UA	breed=holstein	rs135198463,rs41597142,rs136081666
7	block_342_chr_7	rs41605716	rs41580804	89523902	89546406	22504	0.07639	Exterior	89546404	89546408	QTL_ID=43388	trait=Rear_leg_placement_-_rear_view	Abbrev=RLEGR	breed=holstein	rs109898540
7	block_342_chr_7	rs41605716	rs41580804	89523902	89546406	22504	0.07639	Exterior	89546404	89546408	QTL_ID=43389	trait=Teat_placement_-_rear	Abbrev=RTPL	breed=holstein	rs109755494
7	block_342_chr_7	rs41605716	rs41580804	89523902	89546406	22504	0.07639	Exterior	89546404	89546408	QTL_ID=43390	trait=Udder_height	Abbrev=UHT	breed=holstein	rs109220955
7	block_342_chr_7	rs41605716	rs41580804	89523902	89546406	22504	0.07639	Exterior	89546404	89546408	QTL_ID=43392	trait=Stature	Abbrev=STA	breed=holstein	rs29022040
7	block_342_chr_7	rs41605716	rs41580804	89523902	89546406	22504	0.07639	Exterior	89546404	89546408	QTL_ID=43393	trait=Strength	Abbrev=STR	breed=holstein	rs137826123
7	block_342_chr_7	rs41605716	rs41580804	89523902	89546406	22504	0.07639	Exterior	89546404	89546408	QTL_ID=43394	trait=Udder_cleft	Abbrev=UC	breed=brahman	rs133252628
7	block_342_chr_7	rs41605716	rs41580804	89523902	89546406	22504	0.07639	Exterior	89546404	89546408	QTL_ID=43395	trait=Udder_depth	Abbrev=UDPTH	breed=brahman	rs137713131
7	block_342_chr_7	rs41605716	rs41580804	89523902	89546406	22504	0.07639	Production	89523900	89523904	QTL_ID=43368	trait=Body_depth	Abbrev=BD	breed=blonde_d'aquitaine	rs42802606,rs41656325
7	block_342_chr_7	rs41605716	rs41580804	89523902	89546406	22504	0.07639	Production	89523900	89523904	QTL_ID=43371	trait=PTA_type	Abbrev=PTAT	breed=charolais,chianina,gelbvieh,hereford,holstein,limousin,piedmontese,red_angus,simmental,Angus,Maine-Anjou	rs43642952,rs43637279
7	block_342_chr_7	rs41605716	rs41580804	89523902	89546406	22504	0.07639	Production	89523900	89523904	QTL_ID=43377	trait=Rump_width	Abbrev=RUMWD	breed=Angus	rs110838923,rs41594273
7	block_342_chr_7	rs41605716	rs41580804	89523902	89546406	22504	0.07639	Production	89546404	89546408	QTL_ID=43382	trait=Body_depth	Abbrev=BD	breed=holstein	rs43643837,rs42868892
7	block_342_chr_7	rs41605716	rs41580804	89523902	89546406	22504	0.07639	Production	89546404	89546408	QTL_ID=43385	trait=PTA_type	Abbrev=PTAT	breed=holstein	rs43619255,rs41655411,rs43614585
7	block_342_chr_7	rs41605716	rs41580804	89523902	89546406	22504	0.07639	Production	89546404	89546408	QTL_ID=43391	trait=Rump_width	Abbrev=RUMWD	breed=holstein	rs137527434
9	block_73_chr_9	rs41627644	rs110042295	22545838	22573574	27736	0.0583	Milk	22562865	22562869	QTL_ID=33900	trait=Milk_caproic_acid_content	Abbrev=MFA-C6:0	breed=holstein	rs29026129
9	block_73_chr_9	rs41627644	rs110042295	22545838	22573574	27736	0.0583	Milk	22569452	22569456	QTL_ID=33806	trait=Milk_caproic_acid_content	Abbrev=MFA-C6:0	breed=holstein	rs43660984
9	block_73_chr_9	rs41627644	rs110042295	22545838	22573574	27736	0.0583	Production	22573572	22573576	QTL_ID=22597	trait=Body_weight	Abbrev=BW	breed=holstein	rs478020454
9	block_137_chr_9	rs41971041	rs29014434	36978435	37003884	25449	0.06157	Milk	36978433	36978437	QTL_ID=130701	trait=Curd_water_yield	Abbrev=CYWAT	breed=holstein	rs43663781
10	block_99_chr_10	rs109984433	rs109504145	21334443	21363314	28871	0.05124	Production	21363312	21363316	QTL_ID=68117	trait=Body_weight_(yearling)	Abbrev=W365	breed=holstein	rs109819913
10	block_99_chr_10	rs109984433	rs109504145	21334443	21363314	28871	0.05124	Production	21363312	21363316	QTL_ID=68118	trait=Body_weight_gain	Abbrev=BWG	breed=holstein	rs109313220
10	block_243_chr_10	rs43635411	rs41656664	62428623	62450136	21513	0.05536	Exterior	62428621	62428625	QTL_ID=44800	trait=Dairy_form	Abbrev=DYF	breed=holstein	rs109399552
10	block_243_chr_10	rs43635411	rs41656664	62428623	62450136	21513	0.05536	Exterior	62428621	62428625	QTL_ID=44801	trait=Feet_and_leg_conformation	Abbrev=FTLEG	breed=holstein	rs110333090
10	block_243_chr_10	rs43635411	rs41656664	62428623	62450136	21513	0.05536	Exterior	62428621	62428625	QTL_ID=44803	trait=Teat_placement_-_front	Abbrev=FTPL	breed=holstein	rs110333090
10	block_243_chr_10	rs43635411	rs41656664	62428623	62450136	21513	0.05536	Exterior	62428621	62428625	QTL_ID=44804	trait=Udder_attachment	Abbrev=UA	breed=holstein	rs109255853
10	block_243_chr_10	rs43635411	rs41656664	62428623	62450136	21513	0.05536	Exterior	62428621	62428625	QTL_ID=44805	trait=Teat_placement_-_rear	Abbrev=RTPL	breed=holstein	rs109816938
10	block_243_chr_10	rs43635411	rs41656664	62428623	62450136	21513	0.05536	Exterior	62428621	62428625	QTL_ID=44806	trait=Udder_height	Abbrev=UHT	breed=charolais,gelbvieh,hereford,limousin,pinzgauer,red_angus,red_poll,simmental,Angus	rs41621862
10	block_243_chr_10	rs43635411	rs41656664	62428623	62450136	21513	0.05536	Exterior	62428621	62428625	QTL_ID=44809	trait=Stature	Abbrev=STA	breed=charolais,gelbvieh,hereford,limousin,pinzgauer,red_angus,red_poll,simmental,Angus	rs41601379
10	block_243_chr_10	rs43635411	rs41656664	62428623	62450136	21513	0.05536	Exterior	62428621	62428625	QTL_ID=44810	trait=Strength	Abbrev=STR	breed=holstein	rs41601379
10	block_243_chr_10	rs43635411	rs41656664	62428623	62450136	21513	0.05536	Exterior	62428621	62428625	QTL_ID=44811	trait=Udder_cleft	Abbrev=UC	breed=nelore	rs110622921
10	block_243_chr_10	rs43635411	rs41656664	62428623	62450136	21513	0.05536	Exterior	62428621	62428625	QTL_ID=44812	trait=Udder_depth	Abbrev=UDPTH	breed=Girolando	rs41572603
10	block_243_chr_10	rs43635411	rs41656664	62428623	62450136	21513	0.05536	Exterior	62450134	62450138	QTL_ID=44815	trait=Dairy_form	Abbrev=DYF	breed=holstein,jersey	rs109807979,rs110144789,rs110421237
10	block_243_chr_10	rs43635411	rs41656664	62428623	62450136	21513	0.05536	Exterior	62450134	62450138	QTL_ID=44817	trait=Teat_placement_-_front	Abbrev=FTPL	breed=holstein	rs109901742
10	block_243_chr_10	rs43635411	rs41656664	62428623	62450136	21513	0.05536	Exterior	62450134	62450138	QTL_ID=44818	trait=Udder_attachment	Abbrev=UA	breed=holstein	rs134137501
10	block_243_chr_10	rs43635411	rs41656664	62428623	62450136	21513	0.05536	Exterior	62450134	62450138	QTL_ID=44819	trait=Teat_placement_-_rear	Abbrev=RTPL	breed=holstein	rs136299004
10	block_243_chr_10	rs43635411	rs41656664	62428623	62450136	21513	0.05536	Exterior	62450134	62450138	QTL_ID=44820	trait=Udder_height	Abbrev=UHT	breed=hereford,Angus	rs110577755
10	block_243_chr_10	rs43635411	rs41656664	62428623	62450136	21513	0.05536	Exterior	62450134	62450138	QTL_ID=44823	trait=Stature	Abbrev=STA	breed=holstein	rs108974706
10	block_243_chr_10	rs43635411	rs41656664	62428623	62450136	21513	0.05536	Exterior	62450134	62450138	QTL_ID=44824	trait=Strength	Abbrev=STR	breed=holstein	rs109549134
10	block_243_chr_10	rs43635411	rs41656664	62428623	62450136	21513	0.05536	Exterior	62450134	62450138	QTL_ID=44825	trait=Udder_cleft	Abbrev=UC	breed=holstein	rs110240312
10	block_243_chr_10	rs43635411	rs41656664	62428623	62450136	21513	0.05536	Exterior	62450134	62450138	QTL_ID=44826	trait=Udder_depth	Abbrev=UDPTH	breed=holstein	rs110852250
10	block_243_chr_10	rs43635411	rs41656664	62428623	62450136	21513	0.05536	Health	62428621	62428625	QTL_ID=44808	trait=Somatic_cell_score	Abbrev=SCS	breed=charolais,gelbvieh,hereford,limousin,pinzgauer,red_angus,red_poll,simmental,Angus	rs41623519
10	block_243_chr_10	rs43635411	rs41656664	62428623	62450136	21513	0.05536	Health	62450134	62450138	QTL_ID=44822	trait=Somatic_cell_score	Abbrev=SCS	breed=charolais,hereford,red_angus,Angus	rs41621875
10	block_243_chr_10	rs43635411	rs41656664	62428623	62450136	21513	0.05536	Production	62428621	62428625	QTL_ID=23797	trait=Body_weight_(weaning)	Abbrev=WWT	breed=holstein	rs41572603
10	block_243_chr_10	rs43635411	rs41656664	62428623	62450136	21513	0.05536	Production	62428621	62428625	QTL_ID=44798	trait=Body_depth	Abbrev=BD	breed=holstein	rs109492180
10	block_243_chr_10	rs43635411	rs41656664	62428623	62450136	21513	0.05536	Production	62428621	62428625	QTL_ID=44802	trait=PTA_type	Abbrev=PTAT	breed=holstein	rs110958760
10	block_243_chr_10	rs43635411	rs41656664	62428623	62450136	21513	0.05536	Production	62428621	62428625	QTL_ID=44807	trait=Rump_width	Abbrev=RUMWD	breed=charolais,gelbvieh,hereford,limousin,pinzgauer,red_angus,red_poll,simmental,Angus	rs110958760
10	block_243_chr_10	rs43635411	rs41656664	62428623	62450136	21513	0.05536	Production	62450134	62450138	QTL_ID=44813	trait=Body_depth	Abbrev=BD	breed=holstein	rs136225145
10	block_243_chr_10	rs43635411	rs41656664	62428623	62450136	21513	0.05536	Production	62450134	62450138	QTL_ID=44816	trait=PTA_type	Abbrev=PTAT	breed=holstein	rs132650600
10	block_243_chr_10	rs43635411	rs41656664	62428623	62450136	21513	0.05536	Production	62450134	62450138	QTL_ID=44821	trait=Rump_width	Abbrev=RUMWD	breed=hereford,Angus	rs133199127
10	block_243_chr_10	rs43635411	rs41656664	62428623	62450136	21513	0.05536	Reproduction	62428621	62428625	QTL_ID=44799	trait=Calving_ease_(maternal)	Abbrev=CALEASE	breed=holstein	rs110502669
10	block_243_chr_10	rs43635411	rs41656664	62428623	62450136	21513	0.05536	Reproduction	62450134	62450138	QTL_ID=44814	trait=Calving_ease_(maternal)	Abbrev=CALEASE	breed=charolais,gelbvieh,hereford,limousin,pinzgauer,red_angus,red_poll,simmental,Angus	rs137268104
10	block_392_chr_10	rs110572986	rs109837613	99680118	99710643	30525	0.071	Production	99706895	99706899	QTL_ID=65486	trait=Maturity_rate	Abbrev=MATRATE	breed=holstein	rs133460908
12	block_190_chr_12	rs41627728	rs41576936	56276159	56304446	28287	0.05418	Milk	56297589	56297593	QTL_ID=64240	trait=Milk_riboflavin_content	Abbrev=RIBO	breed=holstein	rs464965129
12	block_190_chr_12	rs41627728	rs41576936	56276159	56304446	28287	0.05418	Milk	56299882	56299886	QTL_ID=64241	trait=Milk_riboflavin_content	Abbrev=RIBO	breed=holstein	rs473800316
12	block_190_chr_12	rs41627728	rs41576936	56276159	56304446	28287	0.05418	Milk	56304444	56304448	QTL_ID=64242	trait=Milk_riboflavin_content	Abbrev=RIBO	breed=holstein	rs468213956
14	block_105_chr_14	rs41570832	rs41614771	15454870	15481849	26979	0.0515	Milk	15481847	15481851	QTL_ID=203560	trait=Milk_palmitic_acid_content	Abbrev=MFA-C16:0	breed=holstein	rs110566502
14	block_174_chr_14	rs41635435	rs41639945	30056908	30089537	32629	0.05343	Health	30063828	30063832	QTL_ID=96398	trait=Bovine_tuberculosis_susceptibility	Abbrev=BTBS	breed=holstein	rs110152502
14	block_174_chr_14	rs41635435	rs41639945	30056908	30089537	32629	0.05343	Health	30070395	30070399	QTL_ID=96395	trait=Bovine_tuberculosis_susceptibility	Abbrev=BTBS	breed=holstein	rs110152502
14	block_174_chr_14	rs41635435	rs41639945	30056908	30089537	32629	0.05343	Milk	30056906	30056910	QTL_ID=158046	trait=Milking_speed	Abbrev=MSPD	breed=holstein	rs42216516
14	block_174_chr_14	rs41635435	rs41639945	30056908	30089537	32629	0.05343	Milk	.	.	QTL_ID=170157	trait=Milk_palmitic_acid_content	Abbrev=MFA-C16:0	breed=ayrshire,danish_red,Swedish_Red-and-White	rs41639945
14	block_174_chr_14	rs41635435	rs41639945	30056908	30089537	32629	0.05343	Production	30089535	30089539	QTL_ID=68663	trait=Body_weight_(birth)	Abbrev=BW	breed=holstein	rs110152502
14	block_213_chr_14	rs43576496	rs41661153	41944778	41965713	20935	0.05695	Milk	41944776	41944780	QTL_ID=158090	trait=Milking_speed	Abbrev=MSPD	breed=holstein	rs109715014
14	block_213_chr_14	rs43576496	rs41661153	41944778	41965713	20935	0.05695	Milk	41944776	41944780	QTL_ID=175015	trait=Milk_protein_percentage	Abbrev=PP	breed=holstein	rs42311889
15	block_95_chr_15	rs109476941	rs109186885	28279946	28302223	22277	0.06428	Production	28279944	28279948	QTL_ID=68724	trait=Body_weight_(yearling)	Abbrev=W365	breed=holstein	rs135742812
16	block_156_chr_16	rs41811813	rs109608399	41217175	41244707	27532	0.05262	Milk	41244705	41244709	QTL_ID=26014	trait=Milk_fat_yield	Abbrev=FY	breed=norwegian_red	rs109642392
16	block_156_chr_16	rs41811813	rs109608399	41217175	41244707	27532	0.05262	Milk	41244705	41244709	QTL_ID=26377	trait=Milk_protein_yield	Abbrev=PY	breed=norwegian_red	rs133299490
18	block_6_chr_18	rs110151403	rs109766638	2132264	2159912	27648	0.08335	Exterior	2159910	2159914	QTL_ID=49435	trait=Foot_angle	Abbrev=FANG	breed=brown_swiss	rs110423515
18	block_6_chr_18	rs110151403	rs109766638	2132264	2159912	27648	0.08335	Exterior	2159910	2159914	QTL_ID=49436	trait=Feet_and_leg_conformation	Abbrev=FTLEG	breed=brown_swiss	rs41653204
18	block_6_chr_18	rs110151403	rs109766638	2132264	2159912	27648	0.08335	Exterior	2159910	2159914	QTL_ID=49439	trait=Udder_attachment	Abbrev=UA	breed=brown_swiss	rs111007616
18	block_6_chr_18	rs110151403	rs109766638	2132264	2159912	27648	0.08335	Exterior	2159910	2159914	QTL_ID=49445	trait=Rear_leg_placement_-_rear_view	Abbrev=RLEGR	breed=brown_swiss	rs41923843
18	block_6_chr_18	rs110151403	rs109766638	2132264	2159912	27648	0.08335	Exterior	2159910	2159914	QTL_ID=49446	trait=Rear_leg_placement_-_side_view	Abbrev=RLEGS	breed=brown_swiss	rs41924637
18	block_6_chr_18	rs110151403	rs109766638	2132264	2159912	27648	0.08335	Exterior	2159910	2159914	QTL_ID=49449	trait=Strength	Abbrev=STR	breed=brown_swiss	rs441811558
18	block_6_chr_18	rs110151403	rs109766638	2132264	2159912	27648	0.08335	Exterior	2159910	2159914	QTL_ID=49450	trait=Udder_depth	Abbrev=UDPTH	breed=brown_swiss	rs109195501
18	block_6_chr_18	rs110151403	rs109766638	2132264	2159912	27648	0.08335	Milk	2159910	2159914	QTL_ID=49437	trait=Milk_fat_percentage	Abbrev=FP	breed=brown_swiss	rs109603247
18	block_6_chr_18	rs110151403	rs109766638	2132264	2159912	27648	0.08335	Milk	2159910	2159914	QTL_ID=49440	trait=Milk_fat_yield	Abbrev=FY	breed=brown_swiss	rs386089602,rs380102255,rs384012411
18	block_6_chr_18	rs110151403	rs109766638	2132264	2159912	27648	0.08335	Milk	2159910	2159914	QTL_ID=49443	trait=Milk_protein_percentage	Abbrev=PP	breed=brown_swiss	rs134785404
18	block_6_chr_18	rs110151403	rs109766638	2132264	2159912	27648	0.08335	Milk	2159910	2159914	QTL_ID=49444	trait=Milk_protein_yield	Abbrev=PY	breed=brown_swiss	rs41923838
18	block_6_chr_18	rs110151403	rs109766638	2132264	2159912	27648	0.08335	Production	2159910	2159914	QTL_ID=49438	trait=PTA_type	Abbrev=PTAT	breed=brown_swiss	rs109603247
18	block_6_chr_18	rs110151403	rs109766638	2132264	2159912	27648	0.08335	Production	2159910	2159914	QTL_ID=49441	trait=Net_merit	Abbrev=NM	breed=brown_swiss	rs380102255
18	block_6_chr_18	rs110151403	rs109766638	2132264	2159912	27648	0.08335	Production	2159910	2159914	QTL_ID=49442	trait=Length_of_productive_life	Abbrev=PL	breed=brown_swiss	rs110523614
18	block_6_chr_18	rs110151403	rs109766638	2132264	2159912	27648	0.08335	Reproduction	2132262	2132266	QTL_ID=106866	trait=Conception_rate	Abbrev=CONCRATE	breed=brown_swiss	rs109623709
18	block_6_chr_18	rs110151403	rs109766638	2132264	2159912	27648	0.08335	Reproduction	2159910	2159914	QTL_ID=49434	trait=Calving_ease_(maternal)	Abbrev=CALEASE	breed=brown_swiss	rs110805991
18	block_6_chr_18	rs110151403	rs109766638	2132264	2159912	27648	0.08335	Reproduction	2159910	2159914	QTL_ID=49447	trait=Calving_ease	Abbrev=CALEASE	breed=brown_swiss	rs801239373,rs41923848,rs1116256555
18	block_6_chr_18	rs110151403	rs109766638	2132264	2159912	27648	0.08335	Reproduction	2159910	2159914	QTL_ID=49448	trait=Stillbirth	Abbrev=SB	breed=brown_swiss	rs801239373,rs41923848,rs1116256555
18	block_172_chr_18	rs109074834	rs41581635	43300251	43332104	31853	0.06348	Exterior	43332102	43332106	QTL_ID=49619	trait=Dairy_form	Abbrev=DYF	breed=holstein	rs41946281
18	block_172_chr_18	rs109074834	rs41581635	43300251	43332104	31853	0.06348	Exterior	43332102	43332106	QTL_ID=49627	trait=Udder_depth	Abbrev=UDPTH	breed=holstein	rs29013720
18	block_172_chr_18	rs109074834	rs41581635	43300251	43332104	31853	0.06348	Health	43332102	43332106	QTL_ID=49625	trait=Somatic_cell_score	Abbrev=SCS	breed=holstein	rs41939408
18	block_172_chr_18	rs109074834	rs41581635	43300251	43332104	31853	0.06348	Production	43316321	43316325	QTL_ID=193757	trait=Body_weight_(birth)	Abbrev=BW	breed=holstein	rs29022980
18	block_172_chr_18	rs109074834	rs41581635	43300251	43332104	31853	0.06348	Production	43332102	43332106	QTL_ID=49622	trait=Net_merit	Abbrev=NM	breed=holstein	rs41939339
18	block_172_chr_18	rs109074834	rs41581635	43300251	43332104	31853	0.06348	Production	43332102	43332106	QTL_ID=49623	trait=Length_of_productive_life	Abbrev=PL	breed=holstein	rs41939374
18	block_172_chr_18	rs109074834	rs41581635	43300251	43332104	31853	0.06348	Reproduction	43332102	43332106	QTL_ID=49618	trait=Calving_ease_(maternal)	Abbrev=CALEASE	breed=holstein	rs136249812
18	block_172_chr_18	rs109074834	rs41581635	43300251	43332104	31853	0.06348	Reproduction	43332102	43332106	QTL_ID=49620	trait=Daughter_pregnancy_rate	Abbrev=DPR	breed=holstein	rs137431035
18	block_172_chr_18	rs109074834	rs41581635	43300251	43332104	31853	0.06348	Reproduction	43332102	43332106	QTL_ID=49621	trait=Stillbirth_(maternal)	Abbrev=SB	breed=holstein	rs41938472
18	block_172_chr_18	rs109074834	rs41581635	43300251	43332104	31853	0.06348	Reproduction	43332102	43332106	QTL_ID=49624	trait=Calving_ease	Abbrev=CALEASE	breed=holstein	rs135627903
18	block_172_chr_18	rs109074834	rs41581635	43300251	43332104	31853	0.06348	Reproduction	43332102	43332106	QTL_ID=49626	trait=Stillbirth	Abbrev=SB	breed=holstein	rs136460340
19	block_159_chr_19	rs43729464	rs29015754	41594056	41619572	25516	0.07	Milk	41594054	41594058	QTL_ID=200165	trait=Milk_myristic_acid_content	Abbrev=MFA-C14:0	breed=ayrshire,danish_red,Swedish_Red-and-White	rs133794351
21	block_37_chr_21	rs110152531	rs41574091	11775997	11809040	33043	0.05886	Health	11789195	11789199	QTL_ID=96515	trait=Bovine_tuberculosis_susceptibility	Abbrev=BTBS	breed=holstein	rs134760556
21	block_37_chr_21	rs110152531	rs41574091	11775997	11809040	33043	0.05886	Health	11790063	11790067	QTL_ID=96520	trait=Bovine_tuberculosis_susceptibility	Abbrev=BTBS	breed=holstein	rs137101676
23	block_19_chr_23	rs110708312	rs109793138	4861885	4892090	30205	0.06328	Production	4861883	4861887	QTL_ID=157031	trait=Body_weight_(yearling)	Abbrev=W365	breed=brown_swiss	rs109199086
23	block_19_chr_23	rs110708312	rs109793138	4861885	4892090	30205	0.06328	Production	4892088	4892092	QTL_ID=157030	trait=Body_weight_(yearling)	Abbrev=W365	breed=brown_swiss	rs109176259
23	block_19_chr_23	rs110708312	rs109793138	4861885	4892090	30205	0.06328	Reproduction	4861883	4861887	QTL_ID=14785	trait=Fertility_treatments	Abbrev=FERTRT	breed=ayrshire,danish_red,Swedish_Red-and-White	rs42086574
23	block_59_chr_23	rs109152735	rs109130384	15338295	15367501	29206	0.09398	Production	15338293	15338297	QTL_ID=65985	trait=Body_weight	Abbrev=BW	breed=holstein	rs135126068
24	block_8_chr_24	rs110289935	rs109219465	1657360	1692330	34970	0.06685	Health	1657358	1657362	QTL_ID=19939	trait=Bovine_spongiform_encephalopathy	Abbrev=BSE	breed=charolais,holstein	rs132698245
24	block_10_chr_24	rs41668379	rs42570102	1921310	1940886	19576	0.05666	Exterior	1921308	1921312	QTL_ID=28176	trait=Udder_structure	Abbrev=udder	breed=charolais,chianina,gelbvieh,hereford,holstein,limousin,piedmontese,red_angus,simmental,Angus,Maine-Anjou	rs110375792
24	block_10_chr_24	rs41668379	rs42570102	1921310	1940886	19576	0.05666	Exterior	1940884	1940888	QTL_ID=52253	trait=Dairy_form	Abbrev=DYF	breed=ayrshire,danish_red,Swedish_Red-and-White	rs136788107
24	block_10_chr_24	rs41668379	rs42570102	1921310	1940886	19576	0.05666	Exterior	1940884	1940888	QTL_ID=52255	trait=Foot_angle	Abbrev=FANG	breed=Angus	rs136788107
24	block_10_chr_24	rs41668379	rs42570102	1921310	1940886	19576	0.05666	Exterior	1940884	1940888	QTL_ID=52259	trait=Rear_leg_placement_-_side_view	Abbrev=RLEGS	breed=holstein	rs133899835
24	block_10_chr_24	rs41668379	rs42570102	1921310	1940886	19576	0.05666	Milk	1921308	1921312	QTL_ID=32336	trait=Milk_conjugated_linoleic_acid_content	Abbrev=CLAC18:2	breed=charolais,chianina,gelbvieh,hereford,holstein,limousin,piedmontese,red_angus,simmental,Angus,Maine-Anjou	rs136788107
24	block_10_chr_24	rs41668379	rs42570102	1921310	1940886	19576	0.05666	Milk	1940884	1940888	QTL_ID=52258	trait=Milk_protein_percentage	Abbrev=PP	breed=charolais,gelbvieh,hereford,limousin,pinzgauer,red_angus,red_poll,simmental,Angus	rs133899835
24	block_10_chr_24	rs41668379	rs42570102	1921310	1940886	19576	0.05666	Production	1940884	1940888	QTL_ID=52256	trait=Net_merit	Abbrev=NM	breed=German_Black_Pied	rs110375792
24	block_10_chr_24	rs41668379	rs42570102	1921310	1940886	19576	0.05666	Production	1940884	1940888	QTL_ID=52257	trait=Length_of_productive_life	Abbrev=PL	breed=charolais,gelbvieh,hereford,limousin,pinzgauer,red_angus,red_poll,simmental,Angus	rs41584106
24	block_10_chr_24	rs41668379	rs42570102	1921310	1940886	19576	0.05666	Reproduction	1940884	1940888	QTL_ID=52254	trait=Daughter_pregnancy_rate	Abbrev=DPR	breed=holstein	rs136788107
24	block_10_chr_24	rs41668379	rs42570102	1921310	1940886	19576	0.05666	Reproduction	1940884	1940888	QTL_ID=52260	trait=Calving_ease	Abbrev=CALEASE	breed=holstein	rs133899835
24	block_10_chr_24	rs41668379	rs42570102	1921310	1940886	19576	0.05666	Reproduction	1940884	1940888	QTL_ID=52261	trait=Stillbirth	Abbrev=SB	breed=holstein	rs41584106
24	block_24_chr_24	rs110709141	rs42036241	3851938	3882222	30284	0.05649	Milk	3877985	3877989	QTL_ID=35070	trait=Milk_linoleic_acid_content	Abbrev=MFA-C18:2	breed=ayrshire,danish_red,Swedish_Red-and-White	rs42379635
24	block_236_chr_24	rs110717504	rs110870395	60093951	60176845	82894	0.05239	Milk	60101247	60101251	QTL_ID=113362	trait=Milk_kappa-casein_percentage	Abbrev=MKCASP	breed=ayrshire,danish_red,Swedish_Red-and-White	rs109678718
24	block_236_chr_24	rs110717504	rs110870395	60093951	60176845	82894	0.05239	Milk	60124408	60124412	QTL_ID=112797	trait=Milk_kappa-casein_percentage	Abbrev=MKCASP	breed=ayrshire,danish_red,Swedish_Red-and-White	centromer,BM4505
24	block_236_chr_24	rs110717504	rs110870395	60093951	60176845	82894	0.05239	Production	60093949	60093953	QTL_ID=69276	trait=Body_weight_(yearling)	Abbrev=W365	breed=ayrshire,danish_red,Swedish_Red-and-White	rs109678718
25	block_148_chr_25	rs110476838	rs110704904	32312425	32344248	31823	0.05763	Milk	32344246	32344250	QTL_ID=158305	trait=Milking_speed	Abbrev=MSPD	breed=holstein	rs137373027
26	block_26_chr_26	rs110924756	rs110358830	9836117	9867428	31311	0.05347	Milk	9836115	9836119	QTL_ID=196414	trait=Milk_capric_acid_content	Abbrev=MFA-C10:0	breed=jersey	rs135267521
26	block_26_chr_26	rs110924756	rs110358830	9836117	9867428	31311	0.05347	Milk	9836115	9836119	QTL_ID=196415	trait=Milk_C14_index	Abbrev=MC14	breed=jersey	rs136677471
26	block_26_chr_26	rs110924756	rs110358830	9836117	9867428	31311	0.05347	Milk	9836115	9836119	QTL_ID=196416	trait=Milk_myristoleic_acid_content	Abbrev=MFA-C14:1	breed=jersey	rs133999305
26	block_26_chr_26	rs110924756	rs110358830	9836117	9867428	31311	0.05347	Milk	9836115	9836119	QTL_ID=32552	trait=Milk_myristoleic_acid_content	Abbrev=MFA-C14:1	breed=holstein	rs42092161
26	block_26_chr_26	rs110924756	rs110358830	9836117	9867428	31311	0.05347	Milk	9836115	9836119	QTL_ID=32611	trait=Milk_C14_index	Abbrev=MC14	breed=holstein	rs42092165
26	block_26_chr_26	rs110924756	rs110358830	9836117	9867428	31311	0.05347	Milk	9836115	9836119	QTL_ID=62834	trait=Milk_C14_index	Abbrev=MC14	breed=holstein	rs42092174
26	block_26_chr_26	rs110924756	rs110358830	9836117	9867428	31311	0.05347	Milk	9843563	9843567	QTL_ID=199984	trait=Milk_C14_index	Abbrev=MC14	breed=holstein	rs133999305
26	block_26_chr_26	rs110924756	rs110358830	9836117	9867428	31311	0.05347	Milk	9843563	9843567	QTL_ID=199985	trait=Milk_myristoleic_acid_content	Abbrev=MFA-C14:1	breed=holstein	rs135267521
26	block_26_chr_26	rs110924756	rs110358830	9836117	9867428	31311	0.05347	Milk	9844827	9844831	QTL_ID=199982	trait=Milk_C14_index	Abbrev=MC14	breed=holstein	rs133999305
26	block_26_chr_26	rs110924756	rs110358830	9836117	9867428	31311	0.05347	Milk	9844827	9844831	QTL_ID=199983	trait=Milk_myristoleic_acid_content	Abbrev=MFA-C14:1	breed=holstein	rs136677471
26	block_26_chr_26	rs110924756	rs110358830	9836117	9867428	31311	0.05347	Milk	9845785	9845789	QTL_ID=199980	trait=Milk_C14_index	Abbrev=MC14	breed=jersey	rs135267521
26	block_26_chr_26	rs110924756	rs110358830	9836117	9867428	31311	0.05347	Milk	9845785	9845789	QTL_ID=199981	trait=Milk_myristoleic_acid_content	Abbrev=MFA-C14:1	breed=holstein	rs136677471
26	block_26_chr_26	rs110924756	rs110358830	9836117	9867428	31311	0.05347	Milk	9854101	9854105	QTL_ID=197373	trait=Milk_C14_index	Abbrev=MC14	breed=holstein	rs133999305
26	block_26_chr_26	rs110924756	rs110358830	9836117	9867428	31311	0.05347	Milk	9854101	9854105	QTL_ID=197374	trait=Milk_myristoleic_acid_content	Abbrev=MFA-C14:1	breed=holstein	rs135267521
26	block_26_chr_26	rs110924756	rs110358830	9836117	9867428	31311	0.05347	Milk	9854101	9854105	QTL_ID=202582	trait=Milk_C16_index	Abbrev=MC16	breed=holstein	rs42091368
26	block_26_chr_26	rs110924756	rs110358830	9836117	9867428	31311	0.05347	Milk	9854101	9854105	QTL_ID=208787	trait=Milk_palmitoleic_acid_content	Abbrev=MFA-C16:1	breed=holstein	rs42091368
26	block_26_chr_26	rs110924756	rs110358830	9836117	9867428	31311	0.05347	Milk	9855254	9855258	QTL_ID=205130	trait=Milk_C16_index	Abbrev=MC16	breed=holstein	rs136313314
26	block_26_chr_26	rs110924756	rs110358830	9836117	9867428	31311	0.05347	Milk	9855254	9855258	QTL_ID=211354	trait=Milk_palmitoleic_acid_content	Abbrev=MFA-C16:1	breed=holstein	rs42091368
26	block_26_chr_26	rs110924756	rs110358830	9836117	9867428	31311	0.05347	Milk	9856557	9856561	QTL_ID=201804	trait=Milk_C16_index	Abbrev=MC16	breed=holstein	rs136677471
26	block_26_chr_26	rs110924756	rs110358830	9836117	9867428	31311	0.05347	Milk	9856557	9856561	QTL_ID=207725	trait=Milk_palmitoleic_acid_content	Abbrev=MFA-C16:1	breed=jersey	rs136313314
26	block_26_chr_26	rs110924756	rs110358830	9836117	9867428	31311	0.05347	Milk	9858273	9858277	QTL_ID=202223	trait=Milk_C16_index	Abbrev=MC16	breed=jersey	rs136313314
26	block_26_chr_26	rs110924756	rs110358830	9836117	9867428	31311	0.05347	Milk	9858273	9858277	QTL_ID=208286	trait=Milk_palmitoleic_acid_content	Abbrev=MFA-C16:1	breed=jersey	rs136313314
26	block_26_chr_26	rs110924756	rs110358830	9836117	9867428	31311	0.05347	Milk	9860637	9860641	QTL_ID=204991	trait=Milk_C16_index	Abbrev=MC16	breed=holstein	rs134295703
26	block_26_chr_26	rs110924756	rs110358830	9836117	9867428	31311	0.05347	Milk	9860637	9860641	QTL_ID=211233	trait=Milk_palmitoleic_acid_content	Abbrev=MFA-C16:1	breed=holstein	rs135669257
26	block_26_chr_26	rs110924756	rs110358830	9836117	9867428	31311	0.05347	Milk	9867426	9867430	QTL_ID=196073	trait=Milk_C14_index	Abbrev=MC14	breed=holstein	rs134295703
26	block_39_chr_26	rs41592466	rs42478675	12333205	12369234	36029	0.08559	Milk	12333203	12333207	QTL_ID=198366	trait=Milk_C14_index	Abbrev=MC14	breed=holstein	rs133825521
26	block_39_chr_26	rs41592466	rs42478675	12333205	12369234	36029	0.08559	Milk	12362522	12362526	QTL_ID=196694	trait=Milk_C14_index	Abbrev=MC14	breed=jersey	rs109909331
26	block_39_chr_26	rs41592466	rs42478675	12333205	12369234	36029	0.08559	Milk	12362522	12362526	QTL_ID=201952	trait=Milk_myristoleic_acid_content	Abbrev=MFA-C14:1	breed=jersey	rs109909331
26	block_39_chr_26	rs41592466	rs42478675	12333205	12369234	36029	0.08559	Milk	12363689	12363693	QTL_ID=197280	trait=Milk_C14_index	Abbrev=MC14	breed=holstein	rs134317139
26	block_39_chr_26	rs41592466	rs42478675	12333205	12369234	36029	0.08559	Milk	12363689	12363693	QTL_ID=202502	trait=Milk_myristoleic_acid_content	Abbrev=MFA-C14:1	breed=holstein	rs41660969
26	block_39_chr_26	rs41592466	rs42478675	12333205	12369234	36029	0.08559	Milk	12366434	12366438	QTL_ID=198163	trait=Milk_C14_index	Abbrev=MC14	breed=holstein	rs41660969
26	block_39_chr_26	rs41592466	rs42478675	12333205	12369234	36029	0.08559	Milk	12366434	12366438	QTL_ID=203349	trait=Milk_myristoleic_acid_content	Abbrev=MFA-C14:1	breed=holstein	rs41660969
26	block_39_chr_26	rs41592466	rs42478675	12333205	12369234	36029	0.08559	Milk	12369232	12369236	QTL_ID=199795	trait=Milk_C14_index	Abbrev=MC14	breed=jersey	rs109193590
26	block_39_chr_26	rs41592466	rs42478675	12333205	12369234	36029	0.08559	Milk	12369232	12369236	QTL_ID=204890	trait=Milk_myristoleic_acid_content	Abbrev=MFA-C14:1	breed=jersey	rs797226609
26	block_47_chr_26	rs109184928	rs109653528	14684949	14710058	25109	0.05565	Milk	14690651	14690655	QTL_ID=199721	trait=Milk_C14_index	Abbrev=MC14	breed=holstein	rs42095864
26	block_47_chr_26	rs109184928	rs109653528	14684949	14710058	25109	0.05565	Milk	14690651	14690655	QTL_ID=204760	trait=Milk_myristoleic_acid_content	Abbrev=MFA-C14:1	breed=holstein	rs42095885
26	block_47_chr_26	rs109184928	rs109653528	14684949	14710058	25109	0.05565	Milk	14690651	14690655	QTL_ID=34447	trait=Milk_C14_index	Abbrev=MC14	breed=holstein	rs42092592
26	block_47_chr_26	rs109184928	rs109653528	14684949	14710058	25109	0.05565	Milk	14695941	14695945	QTL_ID=199720	trait=Milk_C14_index	Abbrev=MC14	breed=holstein	rs42095874
26	block_47_chr_26	rs109184928	rs109653528	14684949	14710058	25109	0.05565	Milk	14695941	14695945	QTL_ID=204759	trait=Milk_C16_index	Abbrev=MC16	breed=holstein	rs42095892
26	block_60_chr_26	rs42084620	rs41606817	17606022	17628730	22708	0.05464	Milk	17606020	17606024	QTL_ID=198806	trait=Milk_C14_index	Abbrev=MC14	breed=holstein	rs42097050,rs43043628
26	block_60_chr_26	rs42084620	rs41606817	17606022	17628730	22708	0.05464	Milk	17606020	17606024	QTL_ID=203799	trait=Milk_myristoleic_acid_content	Abbrev=MFA-C14:1	breed=holstein	rs42841226
26	block_60_chr_26	rs42084620	rs41606817	17606022	17628730	22708	0.05464	Milk	17606020	17606024	QTL_ID=210277	trait=Milk_palmitoleic_acid_content	Abbrev=MFA-C16:1	breed=holstein	rs42281654
26	block_60_chr_26	rs42084620	rs41606817	17606022	17628730	22708	0.05464	Milk	17607825	17607829	QTL_ID=198815	trait=Milk_C14_index	Abbrev=MC14	breed=holstein	rs110561879
26	block_60_chr_26	rs42084620	rs41606817	17606022	17628730	22708	0.05464	Milk	17607825	17607829	QTL_ID=203809	trait=Milk_myristoleic_acid_content	Abbrev=MFA-C14:1	breed=holstein	rs109409044
26	block_60_chr_26	rs42084620	rs41606817	17606022	17628730	22708	0.05464	Milk	17607825	17607829	QTL_ID=203810	trait=Milk_C16_index	Abbrev=MC16	breed=holstein	rs110860391
26	block_60_chr_26	rs42084620	rs41606817	17606022	17628730	22708	0.05464	Milk	17607825	17607829	QTL_ID=210281	trait=Milk_palmitoleic_acid_content	Abbrev=MFA-C16:1	breed=holstein	rs109131852
26	block_60_chr_26	rs42084620	rs41606817	17606022	17628730	22708	0.05464	Milk	17617391	17617395	QTL_ID=196133	trait=Milk_C14_index	Abbrev=MC14	breed=holstein	rs136224053
26	block_60_chr_26	rs42084620	rs41606817	17606022	17628730	22708	0.05464	Milk	17617391	17617395	QTL_ID=201342	trait=Milk_myristoleic_acid_content	Abbrev=MFA-C14:1	breed=holstein	rs109753203
26	block_60_chr_26	rs42084620	rs41606817	17606022	17628730	22708	0.05464	Milk	17617391	17617395	QTL_ID=201343	trait=Milk_C16_index	Abbrev=MC16	breed=holstein	rs110313869
26	block_60_chr_26	rs42084620	rs41606817	17606022	17628730	22708	0.05464	Milk	17617391	17617395	QTL_ID=206974	trait=Milk_palmitoleic_acid_content	Abbrev=MFA-C16:1	breed=holstein	rs110561879
26	block_60_chr_26	rs42084620	rs41606817	17606022	17628730	22708	0.05464	Milk	17618192	17618196	QTL_ID=195277	trait=Milk_C14_index	Abbrev=MC14	breed=holstein	rs137033581
26	block_60_chr_26	rs42084620	rs41606817	17606022	17628730	22708	0.05464	Milk	17618192	17618196	QTL_ID=200292	trait=Milk_myristoleic_acid_content	Abbrev=MFA-C14:1	breed=holstein	rs109409044
26	block_60_chr_26	rs42084620	rs41606817	17606022	17628730	22708	0.05464	Milk	17618192	17618196	QTL_ID=200293	trait=Milk_C16_index	Abbrev=MC16	breed=holstein	rs109783310
26	block_60_chr_26	rs42084620	rs41606817	17606022	17628730	22708	0.05464	Milk	17618192	17618196	QTL_ID=205326	trait=Milk_palmitoleic_acid_content	Abbrev=MFA-C16:1	breed=holstein	rs110860391
26	block_60_chr_26	rs42084620	rs41606817	17606022	17628730	22708	0.05464	Milk	17622986	17622990	QTL_ID=198816	trait=Milk_C14_index	Abbrev=MC14	breed=holstein	rs136224053
26	block_60_chr_26	rs42084620	rs41606817	17606022	17628730	22708	0.05464	Milk	17622986	17622990	QTL_ID=203811	trait=Milk_myristoleic_acid_content	Abbrev=MFA-C14:1	breed=holstein	rs42282216
26	block_60_chr_26	rs42084620	rs41606817	17606022	17628730	22708	0.05464	Milk	17622986	17622990	QTL_ID=203812	trait=Milk_C16_index	Abbrev=MC16	breed=holstein	rs42282203
26	block_60_chr_26	rs42084620	rs41606817	17606022	17628730	22708	0.05464	Milk	17622986	17622990	QTL_ID=210282	trait=Milk_palmitoleic_acid_content	Abbrev=MFA-C16:1	breed=holstein	rs42282216
26	block_60_chr_26	rs42084620	rs41606817	17606022	17628730	22708	0.05464	Milk	17624563	17624567	QTL_ID=197078	trait=Milk_C14_index	Abbrev=MC14	breed=holstein	rs137033581
26	block_60_chr_26	rs42084620	rs41606817	17606022	17628730	22708	0.05464	Milk	17624563	17624567	QTL_ID=202305	trait=Milk_myristoleic_acid_content	Abbrev=MFA-C14:1	breed=holstein	rs42282216
26	block_60_chr_26	rs42084620	rs41606817	17606022	17628730	22708	0.05464	Milk	17625694	17625698	QTL_ID=198091	trait=Milk_C14_index	Abbrev=MC14	breed=holstein	rs42282216
26	block_60_chr_26	rs42084620	rs41606817	17606022	17628730	22708	0.05464	Milk	17625694	17625698	QTL_ID=203277	trait=Milk_myristoleic_acid_content	Abbrev=MFA-C14:1	breed=holstein	rs42283047
26	block_60_chr_26	rs42084620	rs41606817	17606022	17628730	22708	0.05464	Milk	17625694	17625698	QTL_ID=203278	trait=Milk_C16_index	Abbrev=MC16	breed=holstein	rs42283047
26	block_60_chr_26	rs42084620	rs41606817	17606022	17628730	22708	0.05464	Milk	17628728	17628732	QTL_ID=198392	trait=Milk_C14_index	Abbrev=MC14	breed=holstein	rs108945159
26	block_60_chr_26	rs42084620	rs41606817	17606022	17628730	22708	0.05464	Milk	17628728	17628732	QTL_ID=203558	trait=Milk_myristoleic_acid_content	Abbrev=MFA-C14:1	breed=holstein	rs42283047
26	block_60_chr_26	rs42084620	rs41606817	17606022	17628730	22708	0.05464	Milk	17628728	17628732	QTL_ID=203559	trait=Milk_C16_index	Abbrev=MC16	breed=holstein	rs42283047
26	block_100_chr_26	rs41604819	rs41636627	27902998	27933010	30012	0.06003	Health	27902996	27903000	QTL_ID=164765	trait=Clinical_mastitis	Abbrev=CM	breed=brown_swiss	rs110294629
26	block_100_chr_26	rs41604819	rs41636627	27902998	27933010	30012	0.06003	Health	27904734	27904738	QTL_ID=164816	trait=Clinical_mastitis	Abbrev=CM	breed=brown_swiss	rs109732989
26	block_100_chr_26	rs41604819	rs41636627	27902998	27933010	30012	0.06003	Health	27906365	27906369	QTL_ID=164817	trait=Clinical_mastitis	Abbrev=CM	breed=brown_swiss	rs798535660
26	block_100_chr_26	rs41604819	rs41636627	27902998	27933010	30012	0.06003	Health	27907105	27907109	QTL_ID=164818	trait=Clinical_mastitis	Abbrev=CM	breed=brown_swiss	rs43706199
26	block_100_chr_26	rs41604819	rs41636627	27902998	27933010	30012	0.06003	Health	27908612	27908616	QTL_ID=164819	trait=Clinical_mastitis	Abbrev=CM	breed=brown_swiss	rs29027496
26	block_100_chr_26	rs41604819	rs41636627	27902998	27933010	30012	0.06003	Health	27909201	27909205	QTL_ID=164820	trait=Clinical_mastitis	Abbrev=CM	breed=brown_swiss	rs109696042
26	block_100_chr_26	rs41604819	rs41636627	27902998	27933010	30012	0.06003	Health	27910654	27910658	QTL_ID=164821	trait=Clinical_mastitis	Abbrev=CM	breed=brown_swiss	rs109696042
26	block_100_chr_26	rs41604819	rs41636627	27902998	27933010	30012	0.06003	Health	27912418	27912422	QTL_ID=164822	trait=Clinical_mastitis	Abbrev=CM	breed=brown_swiss	BMS1600,BMS1948
26	block_100_chr_26	rs41604819	rs41636627	27902998	27933010	30012	0.06003	Health	27913058	27913062	QTL_ID=164823	trait=Clinical_mastitis	Abbrev=CM	breed=brown_swiss	rs42199317,rs42190610
26	block_100_chr_26	rs41604819	rs41636627	27902998	27933010	30012	0.06003	Health	27914646	27914650	QTL_ID=164824	trait=Clinical_mastitis	Abbrev=CM	breed=brown_swiss	rs42199317,rs42190610
26	block_100_chr_26	rs41604819	rs41636627	27902998	27933010	30012	0.06003	Health	27915877	27915881	QTL_ID=164825	trait=Clinical_mastitis	Abbrev=CM	breed=brown_swiss	rs42199297,rs110876824
26	block_100_chr_26	rs41604819	rs41636627	27902998	27933010	30012	0.06003	Health	27917423	27917427	QTL_ID=164826	trait=Clinical_mastitis	Abbrev=CM	breed=brown_swiss	rs42199297,rs110876824
26	block_100_chr_26	rs41604819	rs41636627	27902998	27933010	30012	0.06003	Health	27919613	27919617	QTL_ID=164827	trait=Clinical_mastitis	Abbrev=CM	breed=brown_swiss	rs42199297,rs110876824
26	block_100_chr_26	rs41604819	rs41636627	27902998	27933010	30012	0.06003	Milk	27902996	27903000	QTL_ID=198379	trait=Milk_C14_index	Abbrev=MC14	breed=brown_swiss	rs109843387
26	block_100_chr_26	rs41604819	rs41636627	27902998	27933010	30012	0.06003	Milk	27902996	27903000	QTL_ID=203548	trait=Milk_myristoleic_acid_content	Abbrev=MFA-C14:1	breed=brown_swiss	rs109273173
26	block_100_chr_26	rs41604819	rs41636627	27902998	27933010	30012	0.06003	Milk	27902996	27903000	QTL_ID=210004	trait=Milk_C16_index	Abbrev=MC16	breed=brown_swiss	rs110339141
26	block_100_chr_26	rs41604819	rs41636627	27902998	27933010	30012	0.06003	Milk	27902996	27903000	QTL_ID=210005	trait=Milk_palmitoleic_acid_content	Abbrev=MFA-C16:1	breed=brown_swiss	rs110834204
26	block_100_chr_26	rs41604819	rs41636627	27902998	27933010	30012	0.06003	Milk	27904734	27904738	QTL_ID=197441	trait=Milk_C14_index	Abbrev=MC14	breed=brown_swiss	rs110224964
26	block_100_chr_26	rs41604819	rs41636627	27902998	27933010	30012	0.06003	Milk	27904734	27904738	QTL_ID=202659	trait=Milk_myristoleic_acid_content	Abbrev=MFA-C14:1	breed=brown_swiss	rs137389740
26	block_100_chr_26	rs41604819	rs41636627	27902998	27933010	30012	0.06003	Milk	27904734	27904738	QTL_ID=208875	trait=Milk_C16_index	Abbrev=MC16	breed=brown_swiss	rs479781325
26	block_100_chr_26	rs41604819	rs41636627	27902998	27933010	30012	0.06003	Milk	27904734	27904738	QTL_ID=208876	trait=Milk_palmitoleic_acid_content	Abbrev=MFA-C16:1	breed=brown_swiss	rs714693579
26	block_100_chr_26	rs41604819	rs41636627	27902998	27933010	30012	0.06003	Milk	27906365	27906369	QTL_ID=198427	trait=Milk_C14_index	Abbrev=MC14	breed=brown_swiss	rs474461295
26	block_100_chr_26	rs41604819	rs41636627	27902998	27933010	30012	0.06003	Milk	27906365	27906369	QTL_ID=203597	trait=Milk_myristoleic_acid_content	Abbrev=MFA-C14:1	breed=brown_swiss	rs384487403
26	block_100_chr_26	rs41604819	rs41636627	27902998	27933010	30012	0.06003	Milk	27906365	27906369	QTL_ID=210068	trait=Milk_C16_index	Abbrev=MC16	breed=brown_swiss	rs110552089,rs43709648,rs109977592
26	block_100_chr_26	rs41604819	rs41636627	27902998	27933010	30012	0.06003	Milk	27906365	27906369	QTL_ID=210069	trait=Milk_palmitoleic_acid_content	Abbrev=MFA-C16:1	breed=brown_swiss	rs714948819
26	block_100_chr_26	rs41604819	rs41636627	27902998	27933010	30012	0.06003	Milk	27907105	27907109	QTL_ID=196934	trait=Milk_C14_index	Abbrev=MC14	breed=brown_swiss	rs469753606
26	block_100_chr_26	rs41604819	rs41636627	27902998	27933010	30012	0.06003	Milk	27907105	27907109	QTL_ID=202180	trait=Milk_myristoleic_acid_content	Abbrev=MFA-C14:1	breed=brown_swiss	rs110552089,rs41586223,rs109977592
26	block_100_chr_26	rs41604819	rs41636627	27902998	27933010	30012	0.06003	Milk	27907105	27907109	QTL_ID=208240	trait=Milk_C16_index	Abbrev=MC16	breed=brown_swiss	rs431952291
26	block_100_chr_26	rs41604819	rs41636627	27902998	27933010	30012	0.06003	Milk	27907105	27907109	QTL_ID=208241	trait=Milk_palmitoleic_acid_content	Abbrev=MFA-C16:1	breed=brown_swiss	rs42192738
26	block_100_chr_26	rs41604819	rs41636627	27902998	27933010	30012	0.06003	Milk	27908612	27908616	QTL_ID=196738	trait=Milk_C14_index	Abbrev=MC14	breed=brown_swiss	rs42188540
26	block_100_chr_26	rs41604819	rs41636627	27902998	27933010	30012	0.06003	Milk	27908612	27908616	QTL_ID=201980	trait=Milk_myristoleic_acid_content	Abbrev=MFA-C14:1	breed=brown_swiss	rs482360500
26	block_100_chr_26	rs41604819	rs41636627	27902998	27933010	30012	0.06003	Milk	27908612	27908616	QTL_ID=207985	trait=Milk_C16_index	Abbrev=MC16	breed=brown_swiss	rs472263368
26	block_100_chr_26	rs41604819	rs41636627	27902998	27933010	30012	0.06003	Milk	27908612	27908616	QTL_ID=207986	trait=Milk_palmitoleic_acid_content	Abbrev=MFA-C16:1	breed=brown_swiss	rs477032311
26	block_100_chr_26	rs41604819	rs41636627	27902998	27933010	30012	0.06003	Milk	27909201	27909205	QTL_ID=197392	trait=Milk_C14_index	Abbrev=MC14	breed=brown_swiss	rs447740076
26	block_100_chr_26	rs41604819	rs41636627	27902998	27933010	30012	0.06003	Milk	27909201	27909205	QTL_ID=202604	trait=Milk_myristoleic_acid_content	Abbrev=MFA-C14:1	breed=brown_swiss	rs42198653
26	block_100_chr_26	rs41604819	rs41636627	27902998	27933010	30012	0.06003	Milk	27909201	27909205	QTL_ID=208810	trait=Milk_C16_index	Abbrev=MC16	breed=brown_swiss	rs724039688
26	block_100_chr_26	rs41604819	rs41636627	27902998	27933010	30012	0.06003	Milk	27909201	27909205	QTL_ID=208811	trait=Milk_palmitoleic_acid_content	Abbrev=MFA-C16:1	breed=brown_swiss	rs465440023
26	block_100_chr_26	rs41604819	rs41636627	27902998	27933010	30012	0.06003	Milk	27910654	27910658	QTL_ID=196702	trait=Milk_C14_index	Abbrev=MC14	breed=brown_swiss	rs42188540
26	block_100_chr_26	rs41604819	rs41636627	27902998	27933010	30012	0.06003	Milk	27910654	27910658	QTL_ID=201957	trait=Milk_myristoleic_acid_content	Abbrev=MFA-C14:1	breed=brown_swiss	rs42198651
26	block_100_chr_26	rs41604819	rs41636627	27902998	27933010	30012	0.06003	Milk	27910654	27910658	QTL_ID=207943	trait=Milk_C16_index	Abbrev=MC16	breed=brown_swiss	rs110457204
26	block_100_chr_26	rs41604819	rs41636627	27902998	27933010	30012	0.06003	Milk	27910654	27910658	QTL_ID=207944	trait=Milk_palmitoleic_acid_content	Abbrev=MFA-C16:1	breed=brown_swiss	rs42192429
26	block_100_chr_26	rs41604819	rs41636627	27902998	27933010	30012	0.06003	Milk	27912418	27912422	QTL_ID=197306	trait=Milk_C14_index	Abbrev=MC14	breed=brown_swiss	rs714196936
26	block_100_chr_26	rs41604819	rs41636627	27902998	27933010	30012	0.06003	Milk	27912418	27912422	QTL_ID=202526	trait=Milk_myristoleic_acid_content	Abbrev=MFA-C14:1	breed=brown_swiss	rs379150270
26	block_100_chr_26	rs41604819	rs41636627	27902998	27933010	30012	0.06003	Milk	27912418	27912422	QTL_ID=208705	trait=Milk_C16_index	Abbrev=MC16	breed=Angus	rs110858411
26	block_100_chr_26	rs41604819	rs41636627	27902998	27933010	30012	0.06003	Milk	27912418	27912422	QTL_ID=208706	trait=Milk_palmitoleic_acid_content	Abbrev=MFA-C16:1	breed=brown_swiss	rs42190003
26	block_100_chr_26	rs41604819	rs41636627	27902998	27933010	30012	0.06003	Milk	27913058	27913062	QTL_ID=197754	trait=Milk_C14_index	Abbrev=MC14	breed=caucasian,charolais,hereford,simmental	rs42194371
26	block_100_chr_26	rs41604819	rs41636627	27902998	27933010	30012	0.06003	Milk	27913058	27913062	QTL_ID=202954	trait=Milk_myristoleic_acid_content	Abbrev=MFA-C14:1	breed=brown_swiss	rs42188145
26	block_100_chr_26	rs41604819	rs41636627	27902998	27933010	30012	0.06003	Milk	27913058	27913062	QTL_ID=209265	trait=Milk_C16_index	Abbrev=MC16	breed=brown_swiss	rs110567382
26	block_100_chr_26	rs41604819	rs41636627	27902998	27933010	30012	0.06003	Milk	27913058	27913062	QTL_ID=209266	trait=Milk_palmitoleic_acid_content	Abbrev=MFA-C16:1	breed=brown_swiss	rs110567382
26	block_100_chr_26	rs41604819	rs41636627	27902998	27933010	30012	0.06003	Milk	27914646	27914650	QTL_ID=197231	trait=Milk_C14_index	Abbrev=MC14	breed=Angus	rs110333606
26	block_100_chr_26	rs41604819	rs41636627	27902998	27933010	30012	0.06003	Milk	27914646	27914650	QTL_ID=202452	trait=Milk_myristoleic_acid_content	Abbrev=MFA-C14:1	breed=brown_swiss	rs42194740
26	block_100_chr_26	rs41604819	rs41636627	27902998	27933010	30012	0.06003	Milk	27914646	27914650	QTL_ID=208607	trait=Milk_C16_index	Abbrev=MC16	breed=brown_swiss	rs42198369,rs137262032
26	block_100_chr_26	rs41604819	rs41636627	27902998	27933010	30012	0.06003	Milk	27914646	27914650	QTL_ID=208608	trait=Milk_palmitoleic_acid_content	Abbrev=MFA-C16:1	breed=brown_swiss	rs476573960
26	block_100_chr_26	rs41604819	rs41636627	27902998	27933010	30012	0.06003	Milk	27915877	27915881	QTL_ID=198211	trait=Milk_C14_index	Abbrev=MC14	breed=brown_swiss	BMC1206,BMS1948
26	block_100_chr_26	rs41604819	rs41636627	27902998	27933010	30012	0.06003	Milk	27915877	27915881	QTL_ID=203392	trait=Milk_myristoleic_acid_content	Abbrev=MFA-C14:1	breed=Angus	rs42188145
26	block_100_chr_26	rs41604819	rs41636627	27902998	27933010	30012	0.06003	Milk	27915877	27915881	QTL_ID=209830	trait=Milk_C16_index	Abbrev=MC16	breed=brown_swiss	rs42845824
26	block_100_chr_26	rs41604819	rs41636627	27902998	27933010	30012	0.06003	Milk	27915877	27915881	QTL_ID=209831	trait=Milk_palmitoleic_acid_content	Abbrev=MFA-C16:1	breed=brown_swiss	rs110699324
26	block_100_chr_26	rs41604819	rs41636627	27902998	27933010	30012	0.06003	Milk	27917423	27917427	QTL_ID=196889	trait=Milk_C14_index	Abbrev=MC14	breed=holstein	rs42194370
26	block_100_chr_26	rs41604819	rs41636627	27902998	27933010	30012	0.06003	Milk	27917423	27917427	QTL_ID=202127	trait=Milk_myristoleic_acid_content	Abbrev=MFA-C14:1	breed=brown_swiss	rs41586599
26	block_100_chr_26	rs41604819	rs41636627	27902998	27933010	30012	0.06003	Milk	27917423	27917427	QTL_ID=208169	trait=Milk_C16_index	Abbrev=MC16	breed=brown_swiss	rs42199297
26	block_100_chr_26	rs41604819	rs41636627	27902998	27933010	30012	0.06003	Milk	27917423	27917427	QTL_ID=208170	trait=Milk_palmitoleic_acid_content	Abbrev=MFA-C16:1	breed=brown_swiss	rs42193661
26	block_100_chr_26	rs41604819	rs41636627	27902998	27933010	30012	0.06003	Milk	27919613	27919617	QTL_ID=197317	trait=Milk_C14_index	Abbrev=MC14	breed=brown_swiss	BMS1948
26	block_100_chr_26	rs41604819	rs41636627	27902998	27933010	30012	0.06003	Milk	27919613	27919617	QTL_ID=202536	trait=Milk_myristoleic_acid_content	Abbrev=MFA-C14:1	breed=brown_swiss	rs110594162
26	block_100_chr_26	rs41604819	rs41636627	27902998	27933010	30012	0.06003	Milk	27919613	27919617	QTL_ID=208727	trait=Milk_C16_index	Abbrev=MC16	breed=brown_swiss	rs110567382
26	block_100_chr_26	rs41604819	rs41636627	27902998	27933010	30012	0.06003	Milk	27919613	27919617	QTL_ID=208728	trait=Milk_palmitoleic_acid_content	Abbrev=MFA-C16:1	breed=brown_swiss	rs110567382
26	block_187_chr_26	rs109450346	rs42101711	46765748	46787804	22056	0.06642	Milk	46765746	46765750	QTL_ID=113783	trait=Milk_kappa-casein_percentage	Abbrev=MKCASP	breed=piedmontese
26	block_187_chr_26	rs109450346	rs42101711	46765748	46787804	22056	0.06642	Milk	46765746	46765750	QTL_ID=116938	trait=Milk_glycosylated_kappa-casein_percentage	Abbrev=MGKCASP	breed=charolais,hereford,limousin,simmental,Angus
27	block_96_chr_27	rs29013433	rs41646744	24812065	24839161	27096	0.0826	Reproduction	24839159	24839163	QTL_ID=62078	trait=Sperm_motility	Abbrev=SPMOT	breed=jersey
29	block_57_chr_29	rs108965864	rs43145904	19247857	19281608	33751	0.05163	Exterior	19247855	19247859	QTL_ID=66148	trait=Duration_of_exploration_during_novel_object_test	Abbrev=DENO
29	block_57_chr_29	rs108965864	rs43145904	19247857	19281608	33751	0.05163	Milk	19247855	19247859	QTL_ID=111419	trait=Milk_kappa-casein_percentage	Abbrev=MKCASP
29	block_57_chr_29	rs108965864	rs43145904	19247857	19281608	33751	0.05163	Milk	19247855	19247859	QTL_ID=66158	trait=Milk_yield	Abbrev=MY
29	block_57_chr_29	rs108965864	rs43145904	19247857	19281608	33751	0.05163	Milk	19247855	19247859	QTL_ID=66159	trait=Average_daily_milk_yield	Abbrev=AMY

## Sheet: Haplotypes_LD0.50_top_0.01%
Genes overlapped with the top 0.001% markers in percentage of variance explained
Chromosome	Marker	Start_SNP (marker)	END_SNP (marker)	Start_Position (marker)	End_Position (marker)	Size_in_kb(marker)	%Variance_explained	Ensembl_gene_ID	Start_Position (gene)	End_Position (gene)	Gene_name	Gene_type
1	block_10_chr_1	rs110593395	rs29024375	4250046	4309205	59159	0.11404	ENSBTAG00000017839	4192104	4358253	TIAM1	protein_coding
1	block_10_chr_1	rs110593395	rs29024375	4250046	4309205	59159	0.11404	ENSBTAG00000044299	4288068	4288144	bta-mir-2284i	miRNA
1	block_138_chr_1	rs41255415	rs108992751	66150690	66188904	38214	0.08663	ENSBTAG00000008862	66151427	66215030	GOLGB1	protein_coding
1	block_325_chr_1	rs43021837	rs110353875	144444371	144464756	20385	0.09375	ENSBTAG00000018607	144441578	144619108	TSPEAR	protein_coding
1	block_341_chr_1	rs109817439	rs109871346	149847501	149887148	39647	0.08856	ENSBTAG00000037616	149814196	150141048	KCNJ6	protein_coding
2	block_180_chr_2	rs41575864	rs42977041	69554113	69575725	21612	0.09809	ENSBTAG00000010221	69565219	69664403	CCDC93	protein_coding
3	block_83_chr_3	rs43339412	rs43712305	48234094	48259870	25776	0.12191	ENSBTAG00000021537	48239823	48252404	RWDD3	protein_coding
3	block_266_chr_3	rs110783401	rs109572605	112221070	112257692	36622	0.1038	ENSBTAG00000005784	111603940	112289188	CSMD2	protein_coding
3	block_270_chr_3	rs110656886	rs42460993	113880893	113901073	20180	0.09205	ENSBTAG00000054838	113885085	113894870	lncRNA
3	block_290_chr_3	rs109475915	rs43370810	120380233	120402371	22138	0.10867	ENSBTAG00000000789	120373077	120389112	PPP1R7	protein_coding
4	block_29_chr_4	rs41659143	rs41659140	15935175	15961687	26512	0.12366	ENSBTAG00000043805	15943455	15943556	5S_rRNA	rRNA
4	block_29_chr_4	rs41659143	rs41659140	15935175	15961687	26512	0.12366	ENSBTAG00000047004	15734909	15991563	UMAD1	protein_coding
4	block_89_chr_4	rs43389354	rs42765227	44268015	44332586	64571	0.08888	ENSBTAG00000016324	44146960	44363428	FBXL13	protein_coding
4	block_89_chr_4	rs43389354	rs42765227	44268015	44332586	64571	0.08888	ENSBTAG00000024379	44155991	44279731	LRRC17	protein_coding
5	block_51_chr_5	rs29002549	rs29003499	30184122	30204315	20193	0.09706	ENSBTAG00000016589	30202309	30240990	PRPF40B	protein_coding
5	block_51_chr_5	rs29002549	rs29003499	30184122	30204315	20193	0.09706	ENSBTAG00000016593	30151294	30202352	FMNL3	protein_coding
5	block_190_chr_5	rs109598646	rs109886869	116114118	116134185	20067	0.11621	ENSBTAG00000009351	116028707	116169393	ATXN10	protein_coding
6	block_185_chr_6	rs41653830	rs110841030	71172594	71230710	58116	0.09173	ENSBTAG00000044850	71213166	71213267	U6	snRNA
7	block_26_chr_7	rs109115115	rs110469756	12499123	12522228	23105	0.08895	ENSBTAG00000018229	12481482	12575856	NFIX	protein_coding
7	block_82_chr_7	rs42487828	rs41630389	37616287	37710008	93721	0.13469	ENSBTAG00000019071	37598772	37783067	COMMD10	protein_coding
7	block_102_chr_7	rs41575808	rs109886610	43085607	43105247	19640	0.11833	ENSBTAG00000047560	43101617	43102879	C2CD4C	protein_coding
7	block_206_chr_7	rs41613284	rs109190810	75350671	75380152	29481	0.09179	ENSBTAG00000050903	75358284	75359460	protein_coding
7	block_238_chr_7	rs109398264	rs41571181	95763928	95813211	49283	0.11245	ENSBTAG00000020843	95746303	95790112	PCSK1	protein_coding
7	block_238_chr_7	rs109398264	rs41571181	95763928	95813211	49283	0.11245	ENSBTAG00000049969	95791030	95955111	lncRNA
9	block_148_chr_9	rs41623532	rs41662459	69236440	69270585	34145	0.09484	ENSBTAG00000000240	69203273	69325807	AKAP7	protein_coding
10	block_52_chr_10	rs43625710	rs43075230	28151110	28179409	28299	0.08585	ENSBTAG00000048446	28173165	28174150	OR4F63B	pseudogene
10	block_52_chr_10	rs43625710	rs43075230	28151110	28179409	28299	0.08585	ENSBTAG00000051475	28160076	28161014	OR4F58B	protein_coding
10	block_87_chr_10	rs43625528	rs41588508	44872711	44925897	53186	0.10038	ENSBTAG00000021945	44846568	44939145	NID2	protein_coding
10	block_220_chr_10	rs110572986	rs109837613	99680118	99710643	30525	0.13293	ENSBTAG00000001124	99667901	99724558	GALC	protein_coding
11	block_89_chr_11	rs43669894	rs41591463	25557367	25580727	23360	0.0873	ENSBTAG00000003555	25515109	25845945	THADA	protein_coding
11	block_100_chr_11	rs43671448	rs43677722	28492327	28518141	25814	0.09221	ENSBTAG00000020614	28303215	28635155	PRKCE	protein_coding
11	block_246_chr_11	rs110957579	rs110109644	103406494	103426923	20429	0.1004	ENSBTAG00000006008	103394881	103437809	CAMSAP1	protein_coding
12	block_20_chr_12	rs110675288	rs41580374	12409614	12443527	33913	0.10942	ENSBTAG00000014752	12410713	12461551	AKAP11	protein_coding
14	block_126_chr_14	rs42382244	rs43089152	38274985	38304478	29493	0.13372	ENSBTAG00000004411	38295064	38345541	CRISPLD1	protein_coding
15	block_131_chr_15	rs41257196	rs41778966	64696473	64756466	59993	0.1012	ENSBTAG00000005923	64746521	64932891	ABTB2	protein_coding
15	block_131_chr_15	rs41257196	rs41778966	64696473	64756466	59993	0.1012	ENSBTAG00000016744	64661600	64697021	CAPRIN1	protein_coding
15	block_131_chr_15	rs41257196	rs41778966	64696473	64756466	59993	0.1012	ENSBTAG00000016747	64702013	64740844	NAT10	protein_coding
17	block_162_chr_17	rs110456592	rs41855969	71505929	71528977	23048	0.0912	ENSBTAG00000001325	71518122	71544778	UPB1	protein_coding
17	block_162_chr_17	rs110456592	rs41855969	71505929	71528977	23048	0.0912	ENSBTAG00000021262	71496420	71513527	SNRPD3	protein_coding
17	block_162_chr_17	rs110456592	rs41855969	71505929	71528977	23048	0.0912	ENSBTAG00000022022	71503858	71515630	GUCD1	protein_coding
18	block_115_chr_18	rs109074834	rs41581635	43300251	43332104	31853	0.08769	ENSBTAG00000004864	43316097	43398266	CEP89	protein_coding
19	block_57_chr_19	rs110250279	rs110687354	24678652	24710033	31381	0.09427	ENSBTAG00000016316	24617657	24710635	ZZEF1	protein_coding
20	block_80_chr_20	rs42543872	rs42543895	38543545	38571692	28147	0.1623	ENSBTAG00000023529	38369475	38572090	SPEF2	protein_coding
22	block_97_chr_22	rs41644452	rs42013343	46740639	46762508	21869	0.08609	ENSBTAG00000013117	45924535	46818511	CACNA2D3	protein_coding
23	block_13_chr_23	rs110708312	rs109793138	4861885	4892090	30205	0.08177	ENSBTAG00000025718	4789382	4986934	HMGCLL1	protein_coding
23	block_35_chr_23	rs109152735	rs109130384	15338295	15367501	29206	0.11771	ENSBTAG00000014211	15366276	15417429	FOXP4	protein_coding
23	block_95_chr_23	rs42037449	rs42037482	48067389	48104671	37282	0.08333	ENSBTAG00000005980	48048576	48110128	RREB1	protein_coding
25	block_66_chr_25	rs41587290	rs43071807	28114743	28156096	41353	0.08193	ENSBTAG00000000390	28081759	28188134	TPST1	protein_coding
26	block_105_chr_26	rs109450346	rs42101711	46765748	46787804	22056	0.10272	ENSBTAG00000031890	46392481	46948728	DOCK1	protein_coding
26	block_110_chr_26	rs110105463	rs111008529	48859017	48880894	21877	0.09427	ENSBTAG00000050386	48818674	49095122	MGMT	protein_coding
27	block_50_chr_27	rs41646744	rs42118731	24839161	24870986	31825	0.09887	ENSBTAG00000015913	24865164	24975150	MFHAS1	protein_coding
27	block_71_chr_27	rs109654144	rs109386328	36575886	36596672	20786	0.10096	ENSBTAG00000027629	36565855	36576598	protein_coding
27	block_71_chr_27	rs109654144	rs109386328	36575886	36596672	20786	0.10096	ENSBTAG00000054394	36583409	36610753	protein_coding
28	block_53_chr_28	rs42145039	rs42144386	27704605	27743768	39163	0.08224	ENSBTAG00000021497	27570723	27963222	CDH23	protein_coding
QTL overlapped with the top 0.001% markers in percentage of variance explained
Chromosome	Marker	Start_SNP (marker)	END_SNP (marker)	Start_Position (marker)	End_Position (marker)	Size_in_kb(marker)	%Variance_explained	QTL_Type	Start_Position (QTL)	End_Position (QTL)	QTL_ID	Trait_associated	Trait_Abreviation	Breeds_found	Tag_SNP
1	block_10_chr_1	rs110593395	rs29024375	4250046	4309205	59159	0.11404	Production	4250044	4250048	QTL_ID=66725	trait=Body_weight_(yearling)	Abbrev=W365	breed=Hanwoo	rs378493804
1	block_10_chr_1	rs110593395	rs29024375	4250046	4309205	59159	0.11404	Production	4276063	4276067	QTL_ID=66789	trait=Body_weight_(yearling)	Abbrev=W365	breed=charolais	rs43212771
1	block_10_chr_1	rs110593395	rs29024375	4250046	4309205	59159	0.11404	Reproduction	4253948	4253952	QTL_ID=176659	trait=First_service_conception	Abbrev=FSC	breed=holstein	rs132784449
1	block_10_chr_1	rs110593395	rs29024375	4250046	4309205	59159	0.11404	Reproduction	4253948	4253952	QTL_ID=176888	trait=First_service_conception	Abbrev=FSC	breed=holstein	rs43211381,rs41633082
1	block_10_chr_1	rs110593395	rs29024375	4250046	4309205	59159	0.11404	Reproduction	4253948	4253952	QTL_ID=212069	trait=First_service_conception	Abbrev=FSC	breed=blonde_d'aquitaine	rs43765148,rs109811373,rs43210941
1	block_10_chr_1	rs110593395	rs29024375	4250046	4309205	59159	0.11404	Reproduction	4253948	4253952	QTL_ID=212416	trait=Inseminations_per_conception	Abbrev=CONCEPT	breed=holstein	rs41614480
1	block_132_chr_1	rs43238752	rs41575644	64893868	64920298	26430	0.14745	Reproduction	64893866	64893870	QTL_ID=21147	trait=Age_at_puberty	Abbrev=PUBAGE	breed=holstein	rs42462826
1	block_132_chr_1	rs43238752	rs41575644	64893868	64920298	26430	0.14745	Reproduction	64893866	64893870	QTL_ID=29831	trait=Age_at_puberty	Abbrev=PUBAGE	breed=holstein	rs41633081
1	block_132_chr_1	rs43238752	rs41575644	64893868	64920298	26430	0.14745	Reproduction	64920296	64920300	QTL_ID=29833	trait=Age_at_puberty	Abbrev=PUBAGE	breed=holstein	rs29019349
1	block_138_chr_1	rs41255415	rs108992751	66150690	66188904	38214	0.08663	Reproduction	66188902	66188906	QTL_ID=173355	trait=Daughter_pregnancy_rate	Abbrev=DPR	breed=holstein	rs43243872
1	block_341_chr_1	rs109817439	rs109871346	149847501	149887148	39647	0.08856	Production	149887146	149887150	QTL_ID=131428	trait=Hip_height	Abbrev=HIPHT	breed=holstein	rs1116740047
1	block_341_chr_1	rs109817439	rs109871346	149847501	149887148	39647	0.08856	Production	149887146	149887150	QTL_ID=131429	trait=Hip_height	Abbrev=HIPHT	breed=holstein	rs109130352
2	block_180_chr_2	rs41575864	rs42977041	69554113	69575725	21612	0.09809	Production	69554111	69554115	QTL_ID=157020	trait=Body_weight_(yearling)	Abbrev=W365	breed=holstein	rs43702461
3	block_83_chr_3	rs43339412	rs43712305	48234094	48259870	25776	0.12191	Production	48234092	48234096	QTL_ID=164356	trait=Body_weight_(birth)	Abbrev=BW	breed=holstein	rs41596889
3	block_270_chr_3	rs110656886	rs42460993	113880893	113901073	20180	0.09205	Milk	113884234	113884238	QTL_ID=64006	trait=Milk_riboflavin_content	Abbrev=RIBO	breed=holstein	rs41649818,rs29011657
3	block_270_chr_3	rs110656886	rs42460993	113880893	113901073	20180	0.09205	Milk	113889410	113889414	QTL_ID=64007	trait=Milk_riboflavin_content	Abbrev=RIBO	breed=holstein	rs134458891,rs136801407
5	block_33_chr_5	rs41654781	rs41654780	23326993	23360591	33598	0.09132	Health	23360589	23360593	QTL_ID=160062	trait=Bovine_respiratory_disease_susceptibility	Abbrev=BRDS	breed=brahman	rs109856607
5	block_51_chr_5	rs29002549	rs29003499	30184122	30204315	20193	0.09706	Production	30184901	30184905	QTL_ID=122667	trait=Length_of_productive_life	Abbrev=PL	breed=holstein	rs136538217
5	block_51_chr_5	rs29002549	rs29003499	30184122	30204315	20193	0.09706	Production	30184901	30184905	QTL_ID=123355	trait=Length_of_productive_life	Abbrev=PL	breed=holstein	rs136216231
5	block_51_chr_5	rs29002549	rs29003499	30184122	30204315	20193	0.09706	Production	30189136	30189140	QTL_ID=122668	trait=Length_of_productive_life	Abbrev=PL	breed=holstein	rs110351880
5	block_51_chr_5	rs29002549	rs29003499	30184122	30204315	20193	0.09706	Production	30189136	30189140	QTL_ID=123356	trait=Length_of_productive_life	Abbrev=PL	breed=holstein	rs137424743
5	block_51_chr_5	rs29002549	rs29003499	30184122	30204315	20193	0.09706	Production	30196333	30196337	QTL_ID=122669	trait=Length_of_productive_life	Abbrev=PL	breed=holstein	rs135842805
5	block_51_chr_5	rs29002549	rs29003499	30184122	30204315	20193	0.09706	Production	30196333	30196337	QTL_ID=123357	trait=Length_of_productive_life	Abbrev=PL	breed=holstein	rs109203511
5	block_51_chr_5	rs29002549	rs29003499	30184122	30204315	20193	0.09706	Production	30202419	30202423	QTL_ID=122670	trait=Length_of_productive_life	Abbrev=PL	breed=holstein	rs133689198
5	block_51_chr_5	rs29002549	rs29003499	30184122	30204315	20193	0.09706	Production	30202419	30202423	QTL_ID=123358	trait=Length_of_productive_life	Abbrev=PL	breed=holstein	rs135373021
5	block_51_chr_5	rs29002549	rs29003499	30184122	30204315	20193	0.09706	Reproduction	30184120	30184124	QTL_ID=30147	trait=Interval_to_first_estrus_after_calving	Abbrev=CALEST	breed=holstein	rs109774980
5	block_51_chr_5	rs29002549	rs29003499	30184122	30204315	20193	0.09706	Reproduction	30184120	30184124	QTL_ID=30382	trait=Interval_to_first_estrus_after_calving	Abbrev=CALEST	breed=holstein	rs109903159
5	block_51_chr_5	rs29002549	rs29003499	30184122	30204315	20193	0.09706	Reproduction	30204313	30204317	QTL_ID=30171	trait=Interval_to_first_estrus_after_calving	Abbrev=CALEST	breed=holstein	rs110049706
5	block_51_chr_5	rs29002549	rs29003499	30184122	30204315	20193	0.09706	Reproduction	30204313	30204317	QTL_ID=30409	trait=Interval_to_first_estrus_after_calving	Abbrev=CALEST	breed=holstein	rs110029418
5	block_190_chr_5	rs109598646	rs109886869	116114118	116134185	20067	0.11621	Milk	116134183	116134187	QTL_ID=32345	trait=Milk_delta-9-desaturase_content	Abbrev=D9D	breed=charolais,gelbvieh,hereford,limousin,pinzgauer,red_angus,red_poll,simmental,Angus	rs209727589
6	block_177_chr_6	rs109738132	rs41589903	68159201	68192608	33407	0.0824	Exterior	68159199	68159203	QTL_ID=37348	trait=Eye_area_pigmentation	Abbrev=EYEAP	breed=holstein	rs43703013
6	block_177_chr_6	rs109738132	rs41589903	68159201	68192608	33407	0.0824	Exterior	68159199	68159203	QTL_ID=37364	trait=Facial_pigmentation	Abbrev=FPIGMT	breed=holstein	rs43703013
6	block_177_chr_6	rs109738132	rs41589903	68159201	68192608	33407	0.0824	Exterior	68192606	68192610	QTL_ID=37349	trait=Eye_area_pigmentation	Abbrev=EYEAP	breed=holstein	rs43703013
6	block_177_chr_6	rs109738132	rs41589903	68159201	68192608	33407	0.0824	Exterior	68192606	68192610	QTL_ID=37365	trait=Facial_pigmentation	Abbrev=FPIGMT	breed=holstein	rs43703013
6	block_185_chr_6	rs41653830	rs110841030	71172594	71230710	58116	0.09173	Exterior	71206983	71206987	QTL_ID=42094	trait=Foot_angle	Abbrev=FANG	breed=holstein	rs134909294
6	block_185_chr_6	rs41653830	rs110841030	71172594	71230710	58116	0.09173	Exterior	71206983	71206987	QTL_ID=42095	trait=Feet_and_leg_conformation	Abbrev=FTLEG	breed=holstein	rs135618950
6	block_185_chr_6	rs41653830	rs110841030	71172594	71230710	58116	0.09173	Exterior	71206983	71206987	QTL_ID=42098	trait=Teat_placement_-_front	Abbrev=FTPL	breed=holstein	rs135268913
6	block_185_chr_6	rs41653830	rs110841030	71172594	71230710	58116	0.09173	Exterior	71206983	71206987	QTL_ID=42099	trait=Udder_attachment	Abbrev=UA	breed=holstein	rs135476693
6	block_185_chr_6	rs41653830	rs110841030	71172594	71230710	58116	0.09173	Exterior	71206983	71206987	QTL_ID=42105	trait=Rear_leg_placement_-_rear_view	Abbrev=RLEGR	breed=holstein	rs43472177
6	block_185_chr_6	rs41653830	rs110841030	71172594	71230710	58116	0.09173	Exterior	71206983	71206987	QTL_ID=42106	trait=Udder_height	Abbrev=UHT	breed=holstein	rs43472180
6	block_185_chr_6	rs41653830	rs110841030	71172594	71230710	58116	0.09173	Exterior	71206983	71206987	QTL_ID=42110	trait=Stature	Abbrev=STA	breed=holstein	rs134319416
6	block_185_chr_6	rs41653830	rs110841030	71172594	71230710	58116	0.09173	Exterior	71206983	71206987	QTL_ID=42111	trait=Strength	Abbrev=STR	breed=holstein	rs110707460
6	block_185_chr_6	rs41653830	rs110841030	71172594	71230710	58116	0.09173	Exterior	71206983	71206987	QTL_ID=42112	trait=Udder_depth	Abbrev=UDPTH	breed=holstein	rs134319416
6	block_185_chr_6	rs41653830	rs110841030	71172594	71230710	58116	0.09173	Exterior	71230708	71230712	QTL_ID=42115	trait=Foot_angle	Abbrev=FANG	breed=holstein	rs110707460
6	block_185_chr_6	rs41653830	rs110841030	71172594	71230710	58116	0.09173	Exterior	71230708	71230712	QTL_ID=42116	trait=Feet_and_leg_conformation	Abbrev=FTLEG	breed=holstein	rs134319416
6	block_185_chr_6	rs41653830	rs110841030	71172594	71230710	58116	0.09173	Exterior	71230708	71230712	QTL_ID=42119	trait=Teat_placement_-_front	Abbrev=FTPL	breed=holstein	rs137439073
6	block_185_chr_6	rs41653830	rs110841030	71172594	71230710	58116	0.09173	Exterior	71230708	71230712	QTL_ID=42120	trait=Udder_attachment	Abbrev=UA	breed=holstein	rs137439073
6	block_185_chr_6	rs41653830	rs110841030	71172594	71230710	58116	0.09173	Exterior	71230708	71230712	QTL_ID=42126	trait=Rear_leg_placement_-_rear_view	Abbrev=RLEGR	breed=holstein	rs110354582
6	block_185_chr_6	rs41653830	rs110841030	71172594	71230710	58116	0.09173	Exterior	71230708	71230712	QTL_ID=42127	trait=Udder_height	Abbrev=UHT	breed=holstein	rs110354582
6	block_185_chr_6	rs41653830	rs110841030	71172594	71230710	58116	0.09173	Exterior	71230708	71230712	QTL_ID=42131	trait=Stature	Abbrev=STA	breed=holstein	rs43472217
6	block_185_chr_6	rs41653830	rs110841030	71172594	71230710	58116	0.09173	Exterior	71230708	71230712	QTL_ID=42132	trait=Strength	Abbrev=STR	breed=holstein	rs43472218
6	block_185_chr_6	rs41653830	rs110841030	71172594	71230710	58116	0.09173	Exterior	71230708	71230712	QTL_ID=42133	trait=Udder_depth	Abbrev=UDPTH	breed=holstein	rs43472218
6	block_185_chr_6	rs41653830	rs110841030	71172594	71230710	58116	0.09173	Milk	71172592	71172596	QTL_ID=126237	trait=Milk_myristoleic_acid_content	Abbrev=MFA-C14:1	breed=holstein	rs110955316
6	block_185_chr_6	rs41653830	rs110841030	71172594	71230710	58116	0.09173	Milk	71206983	71206987	QTL_ID=42096	trait=Milk_fat_percentage	Abbrev=FP	breed=holstein	rs133878827
6	block_185_chr_6	rs41653830	rs110841030	71172594	71230710	58116	0.09173	Milk	71206983	71206987	QTL_ID=42100	trait=Milk_fat_yield	Abbrev=FY	breed=holstein	rs43472157
6	block_185_chr_6	rs41653830	rs110841030	71172594	71230710	58116	0.09173	Milk	71206983	71206987	QTL_ID=42103	trait=Milk_protein_percentage	Abbrev=PP	breed=holstein	rs137327740
6	block_185_chr_6	rs41653830	rs110841030	71172594	71230710	58116	0.09173	Milk	71206983	71206987	QTL_ID=42104	trait=Milk_protein_yield	Abbrev=PY	breed=holstein	rs43472176
6	block_185_chr_6	rs41653830	rs110841030	71172594	71230710	58116	0.09173	Milk	71230708	71230712	QTL_ID=42117	trait=Milk_fat_percentage	Abbrev=FP	breed=holstein	rs110707460
6	block_185_chr_6	rs41653830	rs110841030	71172594	71230710	58116	0.09173	Milk	71230708	71230712	QTL_ID=42121	trait=Milk_fat_yield	Abbrev=FY	breed=holstein	rs137439073
6	block_185_chr_6	rs41653830	rs110841030	71172594	71230710	58116	0.09173	Milk	71230708	71230712	QTL_ID=42124	trait=Milk_protein_percentage	Abbrev=PP	breed=holstein	rs110091883
6	block_185_chr_6	rs41653830	rs110841030	71172594	71230710	58116	0.09173	Milk	71230708	71230712	QTL_ID=42125	trait=Milk_protein_yield	Abbrev=PY	breed=holstein	rs110091883
6	block_185_chr_6	rs41653830	rs110841030	71172594	71230710	58116	0.09173	Production	71206983	71206987	QTL_ID=42092	trait=Body_depth	Abbrev=BD	breed=holstein	rs29001782
6	block_185_chr_6	rs41653830	rs110841030	71172594	71230710	58116	0.09173	Production	71206983	71206987	QTL_ID=42097	trait=PTA_type	Abbrev=PTAT	breed=holstein	rs134397439
6	block_185_chr_6	rs41653830	rs110841030	71172594	71230710	58116	0.09173	Production	71206983	71206987	QTL_ID=42101	trait=Net_merit	Abbrev=NM	breed=holstein	rs137625453
6	block_185_chr_6	rs41653830	rs110841030	71172594	71230710	58116	0.09173	Production	71206983	71206987	QTL_ID=42102	trait=Length_of_productive_life	Abbrev=PL	breed=holstein	rs135966324
6	block_185_chr_6	rs41653830	rs110841030	71172594	71230710	58116	0.09173	Production	71206983	71206987	QTL_ID=42107	trait=Rump_width	Abbrev=RUMWD	breed=holstein	rs379452380
6	block_185_chr_6	rs41653830	rs110841030	71172594	71230710	58116	0.09173	Production	71230708	71230712	QTL_ID=42113	trait=Body_depth	Abbrev=BD	breed=holstein	rs110707460
6	block_185_chr_6	rs41653830	rs110841030	71172594	71230710	58116	0.09173	Production	71230708	71230712	QTL_ID=42118	trait=PTA_type	Abbrev=PTAT	breed=holstein	rs110707460
6	block_185_chr_6	rs41653830	rs110841030	71172594	71230710	58116	0.09173	Production	71230708	71230712	QTL_ID=42122	trait=Net_merit	Abbrev=NM	breed=holstein	rs137439073
6	block_185_chr_6	rs41653830	rs110841030	71172594	71230710	58116	0.09173	Production	71230708	71230712	QTL_ID=42123	trait=Length_of_productive_life	Abbrev=PL	breed=holstein	rs110091883
6	block_185_chr_6	rs41653830	rs110841030	71172594	71230710	58116	0.09173	Production	71230708	71230712	QTL_ID=42128	trait=Rump_width	Abbrev=RUMWD	breed=holstein	rs110354582
6	block_185_chr_6	rs41653830	rs110841030	71172594	71230710	58116	0.09173	Production	.	.	QTL_ID=182379	trait=Dry_matter_intake	Abbrev=DMI	breed=Angus	rs110841030
6	block_185_chr_6	rs41653830	rs110841030	71172594	71230710	58116	0.09173	Production	.	.	QTL_ID=184562	trait=Average_daily_gain	Abbrev=ADG	breed=charolais,gelbvieh,hereford,limousin,pinzgauer,red_angus,red_poll,simmental,Angus	rs110841030
6	block_185_chr_6	rs41653830	rs110841030	71172594	71230710	58116	0.09173	Production	.	.	QTL_ID=185307	trait=Average_daily_gain	Abbrev=ADG	breed=Maine-Anjou	rs110841030
6	block_185_chr_6	rs41653830	rs110841030	71172594	71230710	58116	0.09173	Production	.	.	QTL_ID=187366	trait=Metabolic_body_weight	Abbrev=MBW	breed=charolais,gelbvieh,hereford,limousin,pinzgauer,red_angus,red_poll,simmental,Angus	rs110841030
6	block_185_chr_6	rs41653830	rs110841030	71172594	71230710	58116	0.09173	Production	.	.	QTL_ID=187474	trait=Metabolic_body_weight	Abbrev=MBW	breed=charolais,gelbvieh,hereford,limousin,simmental,Angus	rs110841030
6	block_185_chr_6	rs41653830	rs110841030	71172594	71230710	58116	0.09173	Production	.	.	QTL_ID=188492	trait=Metabolic_body_weight	Abbrev=MBW	breed=norwegian_red	rs110841030
6	block_185_chr_6	rs41653830	rs110841030	71172594	71230710	58116	0.09173	Production	.	.	QTL_ID=189510	trait=Metabolic_body_weight	Abbrev=MBW	breed=holstein	rs110841030
6	block_185_chr_6	rs41653830	rs110841030	71172594	71230710	58116	0.09173	Reproduction	71206983	71206987	QTL_ID=42093	trait=Calving_ease_(maternal)	Abbrev=CALEASE	breed=holstein	rs134909294
6	block_185_chr_6	rs41653830	rs110841030	71172594	71230710	58116	0.09173	Reproduction	71206983	71206987	QTL_ID=42108	trait=Calving_ease	Abbrev=CALEASE	breed=holstein	rs452449360
6	block_185_chr_6	rs41653830	rs110841030	71172594	71230710	58116	0.09173	Reproduction	71206983	71206987	QTL_ID=42109	trait=Stillbirth	Abbrev=SB	breed=holstein	rs110707460
6	block_185_chr_6	rs41653830	rs110841030	71172594	71230710	58116	0.09173	Reproduction	71230708	71230712	QTL_ID=42114	trait=Calving_ease_(maternal)	Abbrev=CALEASE	breed=holstein	rs134319416
6	block_185_chr_6	rs41653830	rs110841030	71172594	71230710	58116	0.09173	Reproduction	71230708	71230712	QTL_ID=42129	trait=Calving_ease	Abbrev=CALEASE	breed=holstein	rs110354582
6	block_185_chr_6	rs41653830	rs110841030	71172594	71230710	58116	0.09173	Reproduction	71230708	71230712	QTL_ID=42130	trait=Stillbirth	Abbrev=SB	breed=holstein	rs43472218
6	block_274_chr_6	rs43015979	rs109119833	109865079	109902740	37661	0.11259	Milk	109878338	109878342	QTL_ID=119123	trait=Milk_unglycosylated_kappa-casein_percentage	Abbrev=MUGKCASP	breed=holstein	rs41578582
7	block_26_chr_7	rs109115115	rs110469756	12499123	12522228	23105	0.08895	Exterior	12499121	12499125	QTL_ID=42750	trait=Dairy_form	Abbrev=DYF	breed=holstein	rs43571729
7	block_26_chr_7	rs109115115	rs110469756	12499123	12522228	23105	0.08895	Exterior	12499121	12499125	QTL_ID=42752	trait=Foot_angle	Abbrev=FANG	breed=holstein	rs43571723
7	block_26_chr_7	rs109115115	rs110469756	12499123	12522228	23105	0.08895	Exterior	12499121	12499125	QTL_ID=42757	trait=Rear_leg_placement_-_side_view	Abbrev=RLEGS	breed=holstein	rs435129152
7	block_26_chr_7	rs109115115	rs110469756	12499123	12522228	23105	0.08895	Exterior	12499121	12499125	QTL_ID=42761	trait=Strength	Abbrev=STR	breed=holstein	rs43574961
7	block_26_chr_7	rs109115115	rs110469756	12499123	12522228	23105	0.08895	Exterior	12499121	12499125	QTL_ID=42762	trait=Udder_depth	Abbrev=UDPTH	breed=holstein	rs135043155
7	block_26_chr_7	rs109115115	rs110469756	12499123	12522228	23105	0.08895	Exterior	12522226	12522230	QTL_ID=42763	trait=Dairy_form	Abbrev=DYF	breed=holstein	rs41590582
7	block_26_chr_7	rs109115115	rs110469756	12499123	12522228	23105	0.08895	Exterior	12522226	12522230	QTL_ID=42765	trait=Foot_angle	Abbrev=FANG	breed=holstein	rs41587051
7	block_26_chr_7	rs109115115	rs110469756	12499123	12522228	23105	0.08895	Exterior	12522226	12522230	QTL_ID=42770	trait=Rear_leg_placement_-_side_view	Abbrev=RLEGS	breed=holstein	rs463987848
7	block_26_chr_7	rs109115115	rs110469756	12499123	12522228	23105	0.08895	Exterior	12522226	12522230	QTL_ID=42774	trait=Strength	Abbrev=STR	breed=holstein	rs42884157
7	block_26_chr_7	rs109115115	rs110469756	12499123	12522228	23105	0.08895	Exterior	12522226	12522230	QTL_ID=42775	trait=Udder_depth	Abbrev=UDPTH	breed=ayrshire,danish_red,holstein,jersey,normande,Angus,Fleckvieh,Montbéliarde	rs43565222
7	block_26_chr_7	rs109115115	rs110469756	12499123	12522228	23105	0.08895	Health	12499121	12499125	QTL_ID=42759	trait=Somatic_cell_score	Abbrev=SCS	breed=holstein	rs29012379
7	block_26_chr_7	rs109115115	rs110469756	12499123	12522228	23105	0.08895	Health	12522226	12522230	QTL_ID=42772	trait=Somatic_cell_score	Abbrev=SCS	breed=holstein	rs110877218
7	block_26_chr_7	rs109115115	rs110469756	12499123	12522228	23105	0.08895	Milk	12499121	12499125	QTL_ID=42753	trait=Milk_fat_percentage	Abbrev=FP	breed=holstein	rs41658330
7	block_26_chr_7	rs109115115	rs110469756	12499123	12522228	23105	0.08895	Milk	12499121	12499125	QTL_ID=42756	trait=Milk_protein_percentage	Abbrev=PP	breed=holstein	rs435129152
7	block_26_chr_7	rs109115115	rs110469756	12499123	12522228	23105	0.08895	Milk	12522226	12522230	QTL_ID=42766	trait=Milk_fat_percentage	Abbrev=FP	breed=holstein	rs41612589
7	block_26_chr_7	rs109115115	rs110469756	12499123	12522228	23105	0.08895	Milk	12522226	12522230	QTL_ID=42769	trait=Milk_protein_percentage	Abbrev=PP	breed=holstein	MCM64,CSSM047
7	block_26_chr_7	rs109115115	rs110469756	12499123	12522228	23105	0.08895	Production	12499121	12499125	QTL_ID=42754	trait=Net_merit	Abbrev=NM	breed=holstein	rs137191227
7	block_26_chr_7	rs109115115	rs110469756	12499123	12522228	23105	0.08895	Production	12499121	12499125	QTL_ID=42755	trait=Length_of_productive_life	Abbrev=PL	breed=holstein	rs134530304
7	block_26_chr_7	rs109115115	rs110469756	12499123	12522228	23105	0.08895	Production	12522226	12522230	QTL_ID=42767	trait=Net_merit	Abbrev=NM	breed=holstein	rs110752781
7	block_26_chr_7	rs109115115	rs110469756	12499123	12522228	23105	0.08895	Production	12522226	12522230	QTL_ID=42768	trait=Length_of_productive_life	Abbrev=PL	breed=holstein	rs42359633
7	block_26_chr_7	rs109115115	rs110469756	12499123	12522228	23105	0.08895	Reproduction	12499121	12499125	QTL_ID=42751	trait=Daughter_pregnancy_rate	Abbrev=DPR	breed=holstein	rs43571722
7	block_26_chr_7	rs109115115	rs110469756	12499123	12522228	23105	0.08895	Reproduction	12499121	12499125	QTL_ID=42758	trait=Calving_ease	Abbrev=CALEASE	breed=holstein	rs42962627
7	block_26_chr_7	rs109115115	rs110469756	12499123	12522228	23105	0.08895	Reproduction	12499121	12499125	QTL_ID=42760	trait=Stillbirth	Abbrev=SB	breed=holstein	rs41570498
7	block_26_chr_7	rs109115115	rs110469756	12499123	12522228	23105	0.08895	Reproduction	12522226	12522230	QTL_ID=42764	trait=Daughter_pregnancy_rate	Abbrev=DPR	breed=holstein	rs43733951
7	block_26_chr_7	rs109115115	rs110469756	12499123	12522228	23105	0.08895	Reproduction	12522226	12522230	QTL_ID=42771	trait=Calving_ease	Abbrev=CALEASE	breed=holstein	rs41594926
7	block_26_chr_7	rs109115115	rs110469756	12499123	12522228	23105	0.08895	Reproduction	12522226	12522230	QTL_ID=42773	trait=Stillbirth	Abbrev=SB	breed=holstein	rs41593792
7	block_102_chr_7	rs41575808	rs109886610	43085607	43105247	19640	0.11833	Milk	43085605	43085609	QTL_ID=157531	trait=Milking_speed	Abbrev=MSPD	breed=holstein	rs41611219
7	block_233_chr_7	rs41605716	rs41580804	89523902	89546406	22504	0.13307	Exterior	89523900	89523904	QTL_ID=43369	trait=Dairy_form	Abbrev=DYF	breed=brahman	rs29025644,rs110378393
7	block_233_chr_7	rs41605716	rs41580804	89523902	89546406	22504	0.13307	Exterior	89523900	89523904	QTL_ID=43370	trait=Feet_and_leg_conformation	Abbrev=FTLEG	breed=charolais,chianina,gelbvieh,hereford,holstein,limousin,piedmontese,red_angus,simmental,Angus,Maine-Anjou	rs43643999,rs109559045
7	block_233_chr_7	rs41605716	rs41580804	89523902	89546406	22504	0.13307	Exterior	89523900	89523904	QTL_ID=43372	trait=Teat_placement_-_front	Abbrev=FTPL	breed=holstein	rs41656867,rs109989268
7	block_233_chr_7	rs41605716	rs41580804	89523902	89546406	22504	0.13307	Exterior	89523900	89523904	QTL_ID=43373	trait=Udder_attachment	Abbrev=UA	breed=holstein	rs43642998,rs43650173
7	block_233_chr_7	rs41605716	rs41580804	89523902	89546406	22504	0.13307	Exterior	89523900	89523904	QTL_ID=43374	trait=Rear_leg_placement_-_rear_view	Abbrev=RLEGR	breed=holstein	rs109914287,rs43650187
7	block_233_chr_7	rs41605716	rs41580804	89523902	89546406	22504	0.13307	Exterior	89523900	89523904	QTL_ID=43375	trait=Teat_placement_-_rear	Abbrev=RTPL	breed=charolais,chianina,gelbvieh,hereford,holstein,limousin,piedmontese,red_angus,simmental,Angus,Maine-Anjou	rs110179938,rs110169119
7	block_233_chr_7	rs41605716	rs41580804	89523902	89546406	22504	0.13307	Exterior	89523900	89523904	QTL_ID=43376	trait=Udder_height	Abbrev=UHT	breed=charolais,gelbvieh,hereford,limousin,pinzgauer,red_angus,red_poll,simmental,Angus	rs110201865,rs110056495
7	block_233_chr_7	rs41605716	rs41580804	89523902	89546406	22504	0.13307	Exterior	89523900	89523904	QTL_ID=43378	trait=Stature	Abbrev=STA	breed=charolais,gelbvieh,hereford,limousin,pinzgauer,red_angus,red_poll,simmental,Angus	rs43642675,rs43643308
7	block_233_chr_7	rs41605716	rs41580804	89523902	89546406	22504	0.13307	Exterior	89523900	89523904	QTL_ID=43379	trait=Strength	Abbrev=STR	breed=charolais,gelbvieh,hereford,limousin,pinzgauer,red_angus,red_poll,simmental,Angus	rs41593885,rs110566925
7	block_233_chr_7	rs41605716	rs41580804	89523902	89546406	22504	0.13307	Exterior	89523900	89523904	QTL_ID=43380	trait=Udder_cleft	Abbrev=UC	breed=holstein	rs43647828,rs42868836
7	block_233_chr_7	rs41605716	rs41580804	89523902	89546406	22504	0.13307	Exterior	89523900	89523904	QTL_ID=43381	trait=Udder_depth	Abbrev=UDPTH	breed=holstein	rs110584450,rs109103352
7	block_233_chr_7	rs41605716	rs41580804	89523902	89546406	22504	0.13307	Exterior	89546404	89546408	QTL_ID=43383	trait=Dairy_form	Abbrev=DYF	breed=holstein	rs132960291,rs110702652,rs136362611
7	block_233_chr_7	rs41605716	rs41580804	89523902	89546406	22504	0.13307	Exterior	89546404	89546408	QTL_ID=43384	trait=Feet_and_leg_conformation	Abbrev=FTLEG	breed=charolais,gelbvieh,hereford,limousin,pinzgauer,red_angus,red_poll,simmental,Angus	rs132960291,rs110702652,rs136362611
7	block_233_chr_7	rs41605716	rs41580804	89523902	89546406	22504	0.13307	Exterior	89546404	89546408	QTL_ID=43386	trait=Teat_placement_-_front	Abbrev=FTPL	breed=ayrshire,danish_red,holstein,jersey,norwegian_red,Swedish_Red-and-White	rs43619255,rs41655411,rs43614585
7	block_233_chr_7	rs41605716	rs41580804	89523902	89546406	22504	0.13307	Exterior	89546404	89546408	QTL_ID=43387	trait=Udder_attachment	Abbrev=UA	breed=holstein	rs135198463,rs41597142,rs136081666
7	block_233_chr_7	rs41605716	rs41580804	89523902	89546406	22504	0.13307	Exterior	89546404	89546408	QTL_ID=43388	trait=Rear_leg_placement_-_rear_view	Abbrev=RLEGR	breed=holstein	rs109898540
7	block_233_chr_7	rs41605716	rs41580804	89523902	89546406	22504	0.13307	Exterior	89546404	89546408	QTL_ID=43389	trait=Teat_placement_-_rear	Abbrev=RTPL	breed=holstein	rs109755494
7	block_233_chr_7	rs41605716	rs41580804	89523902	89546406	22504	0.13307	Exterior	89546404	89546408	QTL_ID=43390	trait=Udder_height	Abbrev=UHT	breed=holstein	rs109220955
7	block_233_chr_7	rs41605716	rs41580804	89523902	89546406	22504	0.13307	Exterior	89546404	89546408	QTL_ID=43392	trait=Stature	Abbrev=STA	breed=holstein	rs29022040
7	block_233_chr_7	rs41605716	rs41580804	89523902	89546406	22504	0.13307	Exterior	89546404	89546408	QTL_ID=43393	trait=Strength	Abbrev=STR	breed=holstein	rs137826123
7	block_233_chr_7	rs41605716	rs41580804	89523902	89546406	22504	0.13307	Exterior	89546404	89546408	QTL_ID=43394	trait=Udder_cleft	Abbrev=UC	breed=brahman	rs133252628
7	block_233_chr_7	rs41605716	rs41580804	89523902	89546406	22504	0.13307	Exterior	89546404	89546408	QTL_ID=43395	trait=Udder_depth	Abbrev=UDPTH	breed=brahman	rs137713131
7	block_233_chr_7	rs41605716	rs41580804	89523902	89546406	22504	0.13307	Production	89523900	89523904	QTL_ID=43368	trait=Body_depth	Abbrev=BD	breed=blonde_d'aquitaine	rs42802606,rs41656325
7	block_233_chr_7	rs41605716	rs41580804	89523902	89546406	22504	0.13307	Production	89523900	89523904	QTL_ID=43371	trait=PTA_type	Abbrev=PTAT	breed=charolais,chianina,gelbvieh,hereford,holstein,limousin,piedmontese,red_angus,simmental,Angus,Maine-Anjou	rs43642952,rs43637279
7	block_233_chr_7	rs41605716	rs41580804	89523902	89546406	22504	0.13307	Production	89523900	89523904	QTL_ID=43377	trait=Rump_width	Abbrev=RUMWD	breed=Angus	rs110838923,rs41594273
7	block_233_chr_7	rs41605716	rs41580804	89523902	89546406	22504	0.13307	Production	89546404	89546408	QTL_ID=43382	trait=Body_depth	Abbrev=BD	breed=holstein	rs43643837,rs42868892
7	block_233_chr_7	rs41605716	rs41580804	89523902	89546406	22504	0.13307	Production	89546404	89546408	QTL_ID=43385	trait=PTA_type	Abbrev=PTAT	breed=holstein	rs43619255,rs41655411,rs43614585
7	block_233_chr_7	rs41605716	rs41580804	89523902	89546406	22504	0.13307	Production	89546404	89546408	QTL_ID=43391	trait=Rump_width	Abbrev=RUMWD	breed=holstein	rs137527434
7	block_238_chr_7	rs109398264	rs41571181	95763928	95813211	49283	0.11245	Exterior	95813209	95813213	QTL_ID=43455	trait=Dairy_form	Abbrev=DYF	breed=holstein	rs133786459
7	block_238_chr_7	rs109398264	rs41571181	95763928	95813211	49283	0.11245	Exterior	95813209	95813213	QTL_ID=43458	trait=Teat_placement_-_rear	Abbrev=RTPL	breed=holstein	rs109420502,rs110779428
7	block_238_chr_7	rs109398264	rs41571181	95763928	95813211	49283	0.11245	Exterior	95813209	95813213	QTL_ID=43459	trait=Udder_height	Abbrev=UHT	breed=holstein	rs109741898
7	block_238_chr_7	rs109398264	rs41571181	95763928	95813211	49283	0.11245	Exterior	95813209	95813213	QTL_ID=43461	trait=Teat_length	Abbrev=TLGTH	breed=holstein	rs137705382
7	block_238_chr_7	rs109398264	rs41571181	95763928	95813211	49283	0.11245	Exterior	95813209	95813213	QTL_ID=43462	trait=Udder_cleft	Abbrev=UC	breed=holstein	rs137705382
7	block_238_chr_7	rs109398264	rs41571181	95763928	95813211	49283	0.11245	Milk	95813209	95813213	QTL_ID=43457	trait=Milk_protein_percentage	Abbrev=PP	breed=holstein	rs109420502,rs110779428
7	block_238_chr_7	rs109398264	rs41571181	95763928	95813211	49283	0.11245	Production	95813209	95813213	QTL_ID=43456	trait=PTA_type	Abbrev=PTAT	breed=holstein	rs109420502,rs110779428
7	block_238_chr_7	rs109398264	rs41571181	95763928	95813211	49283	0.11245	Reproduction	95813209	95813213	QTL_ID=43460	trait=Calving_ease	Abbrev=CALEASE	breed=holstein	rs109205723
10	block_130_chr_10	rs43635411	rs41656664	62428623	62450136	21513	0.08637	Exterior	62428621	62428625	QTL_ID=44800	trait=Dairy_form	Abbrev=DYF	breed=holstein	rs109399552
10	block_130_chr_10	rs43635411	rs41656664	62428623	62450136	21513	0.08637	Exterior	62428621	62428625	QTL_ID=44801	trait=Feet_and_leg_conformation	Abbrev=FTLEG	breed=holstein	rs110333090
10	block_130_chr_10	rs43635411	rs41656664	62428623	62450136	21513	0.08637	Exterior	62428621	62428625	QTL_ID=44803	trait=Teat_placement_-_front	Abbrev=FTPL	breed=holstein	rs110333090
10	block_130_chr_10	rs43635411	rs41656664	62428623	62450136	21513	0.08637	Exterior	62428621	62428625	QTL_ID=44804	trait=Udder_attachment	Abbrev=UA	breed=holstein	rs109255853
10	block_130_chr_10	rs43635411	rs41656664	62428623	62450136	21513	0.08637	Exterior	62428621	62428625	QTL_ID=44805	trait=Teat_placement_-_rear	Abbrev=RTPL	breed=holstein	rs109816938
10	block_130_chr_10	rs43635411	rs41656664	62428623	62450136	21513	0.08637	Exterior	62428621	62428625	QTL_ID=44806	trait=Udder_height	Abbrev=UHT	breed=charolais,gelbvieh,hereford,limousin,pinzgauer,red_angus,red_poll,simmental,Angus	rs41621862
10	block_130_chr_10	rs43635411	rs41656664	62428623	62450136	21513	0.08637	Exterior	62428621	62428625	QTL_ID=44809	trait=Stature	Abbrev=STA	breed=charolais,gelbvieh,hereford,limousin,pinzgauer,red_angus,red_poll,simmental,Angus	rs41601379
10	block_130_chr_10	rs43635411	rs41656664	62428623	62450136	21513	0.08637	Exterior	62428621	62428625	QTL_ID=44810	trait=Strength	Abbrev=STR	breed=holstein	rs41601379
10	block_130_chr_10	rs43635411	rs41656664	62428623	62450136	21513	0.08637	Exterior	62428621	62428625	QTL_ID=44811	trait=Udder_cleft	Abbrev=UC	breed=nelore	rs110622921
10	block_130_chr_10	rs43635411	rs41656664	62428623	62450136	21513	0.08637	Exterior	62428621	62428625	QTL_ID=44812	trait=Udder_depth	Abbrev=UDPTH	breed=Girolando	rs41572603
10	block_130_chr_10	rs43635411	rs41656664	62428623	62450136	21513	0.08637	Exterior	62450134	62450138	QTL_ID=44815	trait=Dairy_form	Abbrev=DYF	breed=holstein,jersey	rs109807979,rs110144789,rs110421237
10	block_130_chr_10	rs43635411	rs41656664	62428623	62450136	21513	0.08637	Exterior	62450134	62450138	QTL_ID=44817	trait=Teat_placement_-_front	Abbrev=FTPL	breed=holstein	rs109901742
10	block_130_chr_10	rs43635411	rs41656664	62428623	62450136	21513	0.08637	Exterior	62450134	62450138	QTL_ID=44818	trait=Udder_attachment	Abbrev=UA	breed=holstein	rs134137501
10	block_130_chr_10	rs43635411	rs41656664	62428623	62450136	21513	0.08637	Exterior	62450134	62450138	QTL_ID=44819	trait=Teat_placement_-_rear	Abbrev=RTPL	breed=holstein	rs136299004
10	block_130_chr_10	rs43635411	rs41656664	62428623	62450136	21513	0.08637	Exterior	62450134	62450138	QTL_ID=44820	trait=Udder_height	Abbrev=UHT	breed=hereford,Angus	rs110577755
10	block_130_chr_10	rs43635411	rs41656664	62428623	62450136	21513	0.08637	Exterior	62450134	62450138	QTL_ID=44823	trait=Stature	Abbrev=STA	breed=holstein	rs108974706
10	block_130_chr_10	rs43635411	rs41656664	62428623	62450136	21513	0.08637	Exterior	62450134	62450138	QTL_ID=44824	trait=Strength	Abbrev=STR	breed=holstein	rs109549134
10	block_130_chr_10	rs43635411	rs41656664	62428623	62450136	21513	0.08637	Exterior	62450134	62450138	QTL_ID=44825	trait=Udder_cleft	Abbrev=UC	breed=holstein	rs110240312
10	block_130_chr_10	rs43635411	rs41656664	62428623	62450136	21513	0.08637	Exterior	62450134	62450138	QTL_ID=44826	trait=Udder_depth	Abbrev=UDPTH	breed=holstein	rs110852250
10	block_130_chr_10	rs43635411	rs41656664	62428623	62450136	21513	0.08637	Health	62428621	62428625	QTL_ID=44808	trait=Somatic_cell_score	Abbrev=SCS	breed=charolais,gelbvieh,hereford,limousin,pinzgauer,red_angus,red_poll,simmental,Angus	rs41623519
10	block_130_chr_10	rs43635411	rs41656664	62428623	62450136	21513	0.08637	Health	62450134	62450138	QTL_ID=44822	trait=Somatic_cell_score	Abbrev=SCS	breed=charolais,hereford,red_angus,Angus	rs41621875
10	block_130_chr_10	rs43635411	rs41656664	62428623	62450136	21513	0.08637	Production	62428621	62428625	QTL_ID=23797	trait=Body_weight_(weaning)	Abbrev=WWT	breed=holstein	rs41572603
10	block_130_chr_10	rs43635411	rs41656664	62428623	62450136	21513	0.08637	Production	62428621	62428625	QTL_ID=44798	trait=Body_depth	Abbrev=BD	breed=holstein	rs109492180
10	block_130_chr_10	rs43635411	rs41656664	62428623	62450136	21513	0.08637	Production	62428621	62428625	QTL_ID=44802	trait=PTA_type	Abbrev=PTAT	breed=holstein	rs110958760
10	block_130_chr_10	rs43635411	rs41656664	62428623	62450136	21513	0.08637	Production	62428621	62428625	QTL_ID=44807	trait=Rump_width	Abbrev=RUMWD	breed=charolais,gelbvieh,hereford,limousin,pinzgauer,red_angus,red_poll,simmental,Angus	rs110958760
10	block_130_chr_10	rs43635411	rs41656664	62428623	62450136	21513	0.08637	Production	62450134	62450138	QTL_ID=44813	trait=Body_depth	Abbrev=BD	breed=holstein	rs136225145
10	block_130_chr_10	rs43635411	rs41656664	62428623	62450136	21513	0.08637	Production	62450134	62450138	QTL_ID=44816	trait=PTA_type	Abbrev=PTAT	breed=holstein	rs132650600
10	block_130_chr_10	rs43635411	rs41656664	62428623	62450136	21513	0.08637	Production	62450134	62450138	QTL_ID=44821	trait=Rump_width	Abbrev=RUMWD	breed=hereford,Angus	rs133199127
10	block_130_chr_10	rs43635411	rs41656664	62428623	62450136	21513	0.08637	Reproduction	62428621	62428625	QTL_ID=44799	trait=Calving_ease_(maternal)	Abbrev=CALEASE	breed=holstein	rs110502669
10	block_130_chr_10	rs43635411	rs41656664	62428623	62450136	21513	0.08637	Reproduction	62450134	62450138	QTL_ID=44814	trait=Calving_ease_(maternal)	Abbrev=CALEASE	breed=charolais,gelbvieh,hereford,limousin,pinzgauer,red_angus,red_poll,simmental,Angus	rs137268104
10	block_220_chr_10	rs110572986	rs109837613	99680118	99710643	30525	0.13293	Production	99706895	99706899	QTL_ID=65486	trait=Maturity_rate	Abbrev=MATRATE	breed=holstein	rs133460908
11	block_89_chr_11	rs43669894	rs41591463	25557367	25580727	23360	0.0873	Reproduction	25557365	25557369	QTL_ID=106980	trait=Daughter_pregnancy_rate	Abbrev=DPR	breed=holstein	rs110783012
11	block_89_chr_11	rs43669894	rs41591463	25557367	25580727	23360	0.0873	Reproduction	25557365	25557369	QTL_ID=107136	trait=Conception_rate	Abbrev=CONCRATE	breed=holstein	rs109747867
11	block_246_chr_11	rs110957579	rs110109644	103406494	103426923	20429	0.1004	Milk	103406492	103406496	QTL_ID=130654	trait=Cheese_protein_recovery	Abbrev=RECPROT	breed=jersey	rs110364197
11	block_246_chr_11	rs110957579	rs110109644	103406494	103426923	20429	0.1004	Milk	103410397	103410401	QTL_ID=114049	trait=Milk_beta-lactoglobulin_percentage	Abbrev=MBLGP	breed=holstein	rs110364197
14	block_25_chr_14	rs109634189	rs110502094	5268069	5299013	30944	0.12049	Milk	5268067	5268071	QTL_ID=27090	trait=Milk_fat_percentage	Abbrev=FP	breed=canchim	rs134711585
14	block_25_chr_14	rs109634189	rs110502094	5268069	5299013	30944	0.12049	Milk	5277630	5277634	QTL_ID=33590	trait=Milk_fat_percentage	Abbrev=FP	breed=Wagyu	rs133041862
14	block_25_chr_14	rs109634189	rs110502094	5268069	5299013	30944	0.12049	Milk	5282481	5282485	QTL_ID=33591	trait=Milk_fat_percentage	Abbrev=FP	breed=brahman	rs111018678
14	block_25_chr_14	rs109634189	rs110502094	5268069	5299013	30944	0.12049	Milk	5283455	5283459	QTL_ID=33592	trait=Milk_fat_percentage	Abbrev=FP	breed=holstein	rs111018678
14	block_25_chr_14	rs109634189	rs110502094	5268069	5299013	30944	0.12049	Milk	5284958	5284962	QTL_ID=33593	trait=Milk_fat_percentage	Abbrev=FP	breed=brahman	rs111018678
14	block_25_chr_14	rs109634189	rs110502094	5268069	5299013	30944	0.12049	Milk	5294936	5294940	QTL_ID=200486	trait=Milk_palmitic_acid_content	Abbrev=MFA-C16:0	breed=holstein	rs110752007
14	block_25_chr_14	rs109634189	rs110502094	5268069	5299013	30944	0.12049	Milk	5294936	5294940	QTL_ID=205641	trait=Milk_palmitoleic_acid_content	Abbrev=MFA-C16:1	breed=holstein	rs133125476
14	block_25_chr_14	rs109634189	rs110502094	5268069	5299013	30944	0.12049	Milk	5294936	5294940	QTL_ID=205642	trait=Milk_oleic_acid_content	Abbrev=MFA-C18:1	breed=holstein	rs110544489
14	block_25_chr_14	rs109634189	rs110502094	5268069	5299013	30944	0.12049	Milk	5294936	5294940	QTL_ID=205643	trait=Milk_linoleic_acid_content	Abbrev=MFA-C18:2	breed=holstein	rs137428346
14	block_25_chr_14	rs109634189	rs110502094	5268069	5299013	30944	0.12049	Milk	5294936	5294940	QTL_ID=205644	trait=Milk_linolenic_acid_content	Abbrev=MFA-C18:3n3	breed=holstein	rs41625651
14	block_25_chr_14	rs109634189	rs110502094	5268069	5299013	30944	0.12049	Milk	5294936	5294940	QTL_ID=205645	trait=Milk_caprylic_acid_content	Abbrev=MFA-C8:0	breed=holstein	rs41572919
14	block_25_chr_14	rs109634189	rs110502094	5268069	5299013	30944	0.12049	Milk	5294936	5294940	QTL_ID=33759	trait=Milk_fat_percentage	Abbrev=FP	breed=brahman	rs134216943
14	block_25_chr_14	rs109634189	rs110502094	5268069	5299013	30944	0.12049	Milk	5298719	5298723	QTL_ID=23204	trait=Milk_vitamin_B-12_content	Abbrev=MVB12	breed=brahman	rs134216943
14	block_25_chr_14	rs109634189	rs110502094	5268069	5299013	30944	0.12049	Milk	5299011	5299015	QTL_ID=14991	trait=Milk_fat_percentage	Abbrev=FP	breed=holstein	rs136480876
14	block_25_chr_14	rs109634189	rs110502094	5268069	5299013	30944	0.12049	Milk	5299011	5299015	QTL_ID=161733	trait=Milk_fat_percentage	Abbrev=FP	breed=holstein	rs110828423
14	block_25_chr_14	rs109634189	rs110502094	5268069	5299013	30944	0.12049	Milk	5299011	5299015	QTL_ID=173725	trait=Milk_fat_percentage	Abbrev=FP	breed=brown_swiss	rs109086264
14	block_25_chr_14	rs109634189	rs110502094	5268069	5299013	30944	0.12049	Milk	5299011	5299015	QTL_ID=25571	trait=Milk_yield	Abbrev=MY	breed=holstein	rs109773526
14	block_25_chr_14	rs109634189	rs110502094	5268069	5299013	30944	0.12049	Milk	5299011	5299015	QTL_ID=25985	trait=Milk_fat_yield	Abbrev=FY	breed=charolais,gelbvieh,hereford,limousin,pinzgauer,red_angus,red_poll,simmental,Angus	rs385094052
14	block_25_chr_14	rs109634189	rs110502094	5268069	5299013	30944	0.12049	Milk	5299011	5299015	QTL_ID=26607	trait=Milk_fat_percentage	Abbrev=FP	breed=holstein	rs109059743
14	block_25_chr_14	rs109634189	rs110502094	5268069	5299013	30944	0.12049	Milk	5299011	5299015	QTL_ID=35367	trait=Milk_fat_yield	Abbrev=FY	breed=brahman	rs134216943
14	block_25_chr_14	rs109634189	rs110502094	5268069	5299013	30944	0.12049	Milk	5299011	5299015	QTL_ID=35573	trait=Milk_fat_percentage	Abbrev=FP	breed=jersey,limousin	rs134216943
14	block_25_chr_14	rs109634189	rs110502094	5268069	5299013	30944	0.12049	Reproduction	5268067	5268071	QTL_ID=24605	trait=Calving_ease	Abbrev=CALEASE	breed=Hanwoo	rs132697104
15	block_53_chr_15	rs109476941	rs109186885	28279946	28302223	22277	0.08189	Production	28279944	28279948	QTL_ID=68724	trait=Body_weight_(yearling)	Abbrev=W365	breed=holstein	rs135742812
15	block_131_chr_15	rs41257196	rs41778966	64696473	64756466	59993	0.1012	Milk	64696471	64696475	QTL_ID=174291	trait=Milk_fat_yield	Abbrev=FY	breed=holstein	rs109599951
15	block_131_chr_15	rs41257196	rs41778966	64696473	64756466	59993	0.1012	Milk	64730071	64730075	QTL_ID=174292	trait=Milk_fat_yield	Abbrev=FY	breed=nelore	rs110199147
15	block_131_chr_15	rs41257196	rs41778966	64696473	64756466	59993	0.1012	Production	64696471	64696475	QTL_ID=68759	trait=Body_weight_gain	Abbrev=BWG	breed=holstein	rs478287397
17	block_162_chr_17	rs110456592	rs41855969	71505929	71528977	23048	0.0912	Reproduction	71505927	71505931	QTL_ID=31069	trait=Fertility_index	Abbrev=FERIND	breed=holstein	rs41577620
17	block_162_chr_17	rs110456592	rs41855969	71505929	71528977	23048	0.0912	Reproduction	71525006	71525010	QTL_ID=140959	trait=Non-return_rate	Abbrev=NRR	breed=holstein	rs208645216,rs41919985
17	block_162_chr_17	rs110456592	rs41855969	71505929	71528977	23048	0.0912	Reproduction	71525006	71525010	QTL_ID=142471	trait=Non-return_rate	Abbrev=NRR	breed=holstein	rs208645216,rs41919985
17	block_162_chr_17	rs110456592	rs41855969	71505929	71528977	23048	0.0912	Reproduction	71528391	71528395	QTL_ID=140964	trait=Non-return_rate	Abbrev=NRR	breed=nelore	rs109863510
17	block_162_chr_17	rs110456592	rs41855969	71505929	71528977	23048	0.0912	Reproduction	71528391	71528395	QTL_ID=142469	trait=Non-return_rate	Abbrev=NRR	breed=holstein	rs110514489
18	block_115_chr_18	rs109074834	rs41581635	43300251	43332104	31853	0.08769	Exterior	43332102	43332106	QTL_ID=49619	trait=Dairy_form	Abbrev=DYF	breed=holstein	rs41946281
18	block_115_chr_18	rs109074834	rs41581635	43300251	43332104	31853	0.08769	Exterior	43332102	43332106	QTL_ID=49627	trait=Udder_depth	Abbrev=UDPTH	breed=holstein	rs29013720
18	block_115_chr_18	rs109074834	rs41581635	43300251	43332104	31853	0.08769	Health	43332102	43332106	QTL_ID=49625	trait=Somatic_cell_score	Abbrev=SCS	breed=holstein	rs41939408
18	block_115_chr_18	rs109074834	rs41581635	43300251	43332104	31853	0.08769	Production	43316321	43316325	QTL_ID=193757	trait=Body_weight_(birth)	Abbrev=BW	breed=holstein	rs29022980
18	block_115_chr_18	rs109074834	rs41581635	43300251	43332104	31853	0.08769	Production	43332102	43332106	QTL_ID=49622	trait=Net_merit	Abbrev=NM	breed=holstein	rs41939339
18	block_115_chr_18	rs109074834	rs41581635	43300251	43332104	31853	0.08769	Production	43332102	43332106	QTL_ID=49623	trait=Length_of_productive_life	Abbrev=PL	breed=holstein	rs41939374
18	block_115_chr_18	rs109074834	rs41581635	43300251	43332104	31853	0.08769	Reproduction	43332102	43332106	QTL_ID=49618	trait=Calving_ease_(maternal)	Abbrev=CALEASE	breed=holstein	rs136249812
18	block_115_chr_18	rs109074834	rs41581635	43300251	43332104	31853	0.08769	Reproduction	43332102	43332106	QTL_ID=49620	trait=Daughter_pregnancy_rate	Abbrev=DPR	breed=holstein	rs137431035
18	block_115_chr_18	rs109074834	rs41581635	43300251	43332104	31853	0.08769	Reproduction	43332102	43332106	QTL_ID=49621	trait=Stillbirth_(maternal)	Abbrev=SB	breed=holstein	rs41938472
18	block_115_chr_18	rs109074834	rs41581635	43300251	43332104	31853	0.08769	Reproduction	43332102	43332106	QTL_ID=49624	trait=Calving_ease	Abbrev=CALEASE	breed=holstein	rs135627903
18	block_115_chr_18	rs109074834	rs41581635	43300251	43332104	31853	0.08769	Reproduction	43332102	43332106	QTL_ID=49626	trait=Stillbirth	Abbrev=SB	breed=holstein	rs136460340
23	block_13_chr_23	rs110708312	rs109793138	4861885	4892090	30205	0.08177	Production	4861883	4861887	QTL_ID=157031	trait=Body_weight_(yearling)	Abbrev=W365	breed=brown_swiss	rs109199086
23	block_13_chr_23	rs110708312	rs109793138	4861885	4892090	30205	0.08177	Production	4892088	4892092	QTL_ID=157030	trait=Body_weight_(yearling)	Abbrev=W365	breed=brown_swiss	rs109176259
23	block_13_chr_23	rs110708312	rs109793138	4861885	4892090	30205	0.08177	Reproduction	4861883	4861887	QTL_ID=14785	trait=Fertility_treatments	Abbrev=FERTRT	breed=ayrshire,danish_red,Swedish_Red-and-White	rs42086574
23	block_35_chr_23	rs109152735	rs109130384	15338295	15367501	29206	0.11771	Production	15338293	15338297	QTL_ID=65985	trait=Body_weight	Abbrev=BW	breed=holstein	rs135126068
23	block_95_chr_23	rs42037449	rs42037482	48067389	48104671	37282	0.08333	Exterior	48104669	48104673	QTL_ID=107642	trait=Temperament	Abbrev=TMP	breed=ayrshire,danish_red,Swedish_Red-and-White	rs110591920
25	block_28_chr_25	rs109227319	rs110017755	6080581	6109723	29142	0.08671	Milk	6080579	6080583	QTL_ID=158288	trait=Milking_speed	Abbrev=MSPD	breed=jersey	rs137225796
25	block_28_chr_25	rs109227319	rs110017755	6080581	6109723	29142	0.08671	Milk	6109721	6109725	QTL_ID=158289	trait=Milking_speed	Abbrev=MSPD	breed=jersey	rs137225796
25	block_66_chr_25	rs41587290	rs43071807	28114743	28156096	41353	0.08193	Reproduction	28123089	28123093	QTL_ID=107220	trait=Conception_rate	Abbrev=CONCRATE	breed=jersey	rs110336893
26	block_105_chr_26	rs109450346	rs42101711	46765748	46787804	22056	0.10272	Milk	46765746	46765750	QTL_ID=113783	trait=Milk_kappa-casein_percentage	Abbrev=MKCASP	breed=piedmontese
26	block_105_chr_26	rs109450346	rs42101711	46765748	46787804	22056	0.10272	Milk	46765746	46765750	QTL_ID=116938	trait=Milk_glycosylated_kappa-casein_percentage	Abbrev=MGKCASP	breed=charolais,hereford,limousin,simmental,Angus
27	block_50_chr_27	rs41646744	rs42118731	24839161	24870986	31825	0.09887	Reproduction	24839159	24839163	QTL_ID=62078	trait=Sperm_motility	Abbrev=SPMOT	breed=jersey
27	block_71_chr_27	rs109654144	rs109386328	36575886	36596672	20786	0.10096	Milk	36575985	36575989	QTL_ID=147769	trait=Milk_fat_percentage	Abbrev=FP
27	block_71_chr_27	rs109654144	rs109386328	36575886	36596672	20786	0.10096	Milk	36576396	36576400	QTL_ID=147848	trait=Milk_fat_percentage	Abbrev=FP
27	block_71_chr_27	rs109654144	rs109386328	36575886	36596672	20786	0.10096	Milk	36576635	36576639	QTL_ID=147901	trait=Milk_fat_percentage	Abbrev=FP
27	block_71_chr_27	rs109654144	rs109386328	36575886	36596672	20786	0.10096	Milk	36576639	36576643	QTL_ID=147885	trait=Milk_fat_percentage	Abbrev=FP
27	block_71_chr_27	rs109654144	rs109386328	36575886	36596672	20786	0.10096	Milk	36576864	36576868	QTL_ID=147891	trait=Milk_fat_percentage	Abbrev=FP
27	block_71_chr_27	rs109654144	rs109386328	36575886	36596672	20786	0.10096	Milk	36577139	36577143	QTL_ID=147872	trait=Milk_fat_percentage	Abbrev=FP
27	block_71_chr_27	rs109654144	rs109386328	36575886	36596672	20786	0.10096	Milk	36577186	36577190	QTL_ID=148024	trait=Milk_fat_percentage	Abbrev=FP
27	block_71_chr_27	rs109654144	rs109386328	36575886	36596672	20786	0.10096	Milk	36577798	36577802	QTL_ID=147913	trait=Milk_fat_percentage	Abbrev=FP
27	block_71_chr_27	rs109654144	rs109386328	36575886	36596672	20786	0.10096	Milk	36577871	36577875	QTL_ID=147860	trait=Milk_fat_percentage	Abbrev=FP
27	block_71_chr_27	rs109654144	rs109386328	36575886	36596672	20786	0.10096	Milk	36578003	36578007	QTL_ID=147938	trait=Milk_fat_percentage	Abbrev=FP
27	block_71_chr_27	rs109654144	rs109386328	36575886	36596672	20786	0.10096	Milk	36578217	36578221	QTL_ID=147911	trait=Milk_fat_percentage	Abbrev=FP
27	block_71_chr_27	rs109654144	rs109386328	36575886	36596672	20786	0.10096	Milk	36578344	36578348	QTL_ID=147863	trait=Milk_fat_percentage	Abbrev=FP
27	block_71_chr_27	rs109654144	rs109386328	36575886	36596672	20786	0.10096	Milk	36578546	36578550	QTL_ID=147833	trait=Milk_fat_percentage	Abbrev=FP
27	block_71_chr_27	rs109654144	rs109386328	36575886	36596672	20786	0.10096	Milk	36578553	36578557	QTL_ID=147874	trait=Milk_fat_percentage	Abbrev=FP
27	block_71_chr_27	rs109654144	rs109386328	36575886	36596672	20786	0.10096	Milk	36578566	36578570	QTL_ID=147788	trait=Milk_fat_percentage	Abbrev=FP
27	block_71_chr_27	rs109654144	rs109386328	36575886	36596672	20786	0.10096	Milk	36578817	36578821	QTL_ID=147948	trait=Milk_fat_percentage	Abbrev=FP
27	block_71_chr_27	rs109654144	rs109386328	36575886	36596672	20786	0.10096	Milk	36579105	36579109	QTL_ID=147760	trait=Milk_fat_percentage	Abbrev=FP
27	block_71_chr_27	rs109654144	rs109386328	36575886	36596672	20786	0.10096	Milk	36579214	36579218	QTL_ID=147767	trait=Milk_fat_percentage	Abbrev=FP
27	block_71_chr_27	rs109654144	rs109386328	36575886	36596672	20786	0.10096	Milk	36579344	36579348	QTL_ID=147803	trait=Milk_fat_percentage	Abbrev=FP
27	block_71_chr_27	rs109654144	rs109386328	36575886	36596672	20786	0.10096	Milk	36579442	36579446	QTL_ID=147971	trait=Milk_fat_percentage	Abbrev=FP
27	block_71_chr_27	rs109654144	rs109386328	36575886	36596672	20786	0.10096	Milk	36580213	36580217	QTL_ID=148062	trait=Milk_fat_percentage	Abbrev=FP
27	block_71_chr_27	rs109654144	rs109386328	36575886	36596672	20786	0.10096	Milk	36580339	36580343	QTL_ID=147799	trait=Milk_fat_percentage	Abbrev=FP
27	block_71_chr_27	rs109654144	rs109386328	36575886	36596672	20786	0.10096	Milk	36580837	36580841	QTL_ID=147789	trait=Milk_fat_percentage	Abbrev=FP
27	block_71_chr_27	rs109654144	rs109386328	36575886	36596672	20786	0.10096	Milk	36581976	36581980	QTL_ID=148021	trait=Milk_fat_percentage	Abbrev=FP
27	block_71_chr_27	rs109654144	rs109386328	36575886	36596672	20786	0.10096	Milk	36582247	36582251	QTL_ID=147809	trait=Milk_fat_percentage	Abbrev=FP
27	block_71_chr_27	rs109654144	rs109386328	36575886	36596672	20786	0.10096	Milk	36582261	36582265	QTL_ID=147762	trait=Milk_fat_percentage	Abbrev=FP
27	block_71_chr_27	rs109654144	rs109386328	36575886	36596672	20786	0.10096	Milk	36582342	36582346	QTL_ID=148029	trait=Milk_fat_percentage	Abbrev=FP
27	block_71_chr_27	rs109654144	rs109386328	36575886	36596672	20786	0.10096	Milk	36582505	36582509	QTL_ID=148086	trait=Milk_fat_percentage	Abbrev=FP
27	block_71_chr_27	rs109654144	rs109386328	36575886	36596672	20786	0.10096	Milk	36582713	36582717	QTL_ID=147783	trait=Milk_fat_percentage	Abbrev=FP
27	block_71_chr_27	rs109654144	rs109386328	36575886	36596672	20786	0.10096	Milk	36582965	36582969	QTL_ID=148014	trait=Milk_fat_percentage	Abbrev=FP
27	block_71_chr_27	rs109654144	rs109386328	36575886	36596672	20786	0.10096	Milk	36585918	36585922	QTL_ID=147850	trait=Milk_fat_percentage	Abbrev=FP
27	block_71_chr_27	rs109654144	rs109386328	36575886	36596672	20786	0.10096	Milk	36585991	36585995	QTL_ID=148009	trait=Milk_fat_percentage	Abbrev=FP
27	block_71_chr_27	rs109654144	rs109386328	36575886	36596672	20786	0.10096	Milk	36586049	36586053	QTL_ID=148001	trait=Milk_fat_percentage	Abbrev=FP
27	block_71_chr_27	rs109654144	rs109386328	36575886	36596672	20786	0.10096	Milk	36587503	36587507	QTL_ID=147939	trait=Milk_fat_percentage	Abbrev=FP
27	block_71_chr_27	rs109654144	rs109386328	36575886	36596672	20786	0.10096	Milk	36587520	36587524	QTL_ID=147835	trait=Milk_fat_percentage	Abbrev=FP
27	block_71_chr_27	rs109654144	rs109386328	36575886	36596672	20786	0.10096	Milk	36587532	36587536	QTL_ID=148090	trait=Milk_fat_percentage	Abbrev=FP
27	block_71_chr_27	rs109654144	rs109386328	36575886	36596672	20786	0.10096	Milk	36587744	36587748	QTL_ID=147967	trait=Milk_fat_percentage	Abbrev=FP
27	block_71_chr_27	rs109654144	rs109386328	36575886	36596672	20786	0.10096	Milk	36587929	36587933	QTL_ID=147784	trait=Milk_fat_percentage	Abbrev=FP
27	block_71_chr_27	rs109654144	rs109386328	36575886	36596672	20786	0.10096	Milk	36588385	36588389	QTL_ID=147974	trait=Milk_fat_percentage	Abbrev=FP
27	block_71_chr_27	rs109654144	rs109386328	36575886	36596672	20786	0.10096	Milk	36588556	36588560	QTL_ID=148073	trait=Milk_fat_percentage	Abbrev=FP
27	block_71_chr_27	rs109654144	rs109386328	36575886	36596672	20786	0.10096	Milk	36588602	36588606	QTL_ID=148072	trait=Milk_fat_percentage	Abbrev=FP
27	block_71_chr_27	rs109654144	rs109386328	36575886	36596672	20786	0.10096	Milk	36588620	36588624	QTL_ID=147806	trait=Milk_fat_percentage	Abbrev=FP
27	block_71_chr_27	rs109654144	rs109386328	36575886	36596672	20786	0.10096	Milk	36588674	36588678	QTL_ID=148266	trait=Milk_fat_percentage	Abbrev=FP
27	block_71_chr_27	rs109654144	rs109386328	36575886	36596672	20786	0.10096	Milk	36588679	36588683	QTL_ID=148162	trait=Milk_fat_percentage	Abbrev=FP
27	block_71_chr_27	rs109654144	rs109386328	36575886	36596672	20786	0.10096	Milk	36588692	36588696	QTL_ID=147988	trait=Milk_fat_percentage	Abbrev=FP
27	block_71_chr_27	rs109654144	rs109386328	36575886	36596672	20786	0.10096	Milk	36588942	36588946	QTL_ID=147776	trait=Milk_fat_percentage	Abbrev=FP
27	block_71_chr_27	rs109654144	rs109386328	36575886	36596672	20786	0.10096	Milk	36588966	36588970	QTL_ID=147812	trait=Milk_fat_percentage	Abbrev=FP
27	block_71_chr_27	rs109654144	rs109386328	36575886	36596672	20786	0.10096	Milk	36589048	36589052	QTL_ID=147817	trait=Milk_fat_percentage	Abbrev=FP
27	block_71_chr_27	rs109654144	rs109386328	36575886	36596672	20786	0.10096	Milk	36589084	36589088	QTL_ID=148013	trait=Milk_fat_percentage	Abbrev=FP
27	block_71_chr_27	rs109654144	rs109386328	36575886	36596672	20786	0.10096	Milk	36589129	36589133	QTL_ID=148182	trait=Milk_fat_percentage	Abbrev=FP
27	block_71_chr_27	rs109654144	rs109386328	36575886	36596672	20786	0.10096	Milk	36589237	36589241	QTL_ID=148108	trait=Milk_fat_percentage	Abbrev=FP
27	block_71_chr_27	rs109654144	rs109386328	36575886	36596672	20786	0.10096	Milk	36589349	36589353	QTL_ID=147796	trait=Milk_fat_percentage	Abbrev=FP
27	block_71_chr_27	rs109654144	rs109386328	36575886	36596672	20786	0.10096	Milk	36589541	36589545	QTL_ID=147951	trait=Milk_fat_percentage	Abbrev=FP
27	block_71_chr_27	rs109654144	rs109386328	36575886	36596672	20786	0.10096	Milk	36589563	36589567	QTL_ID=148000	trait=Milk_fat_percentage	Abbrev=FP
27	block_71_chr_27	rs109654144	rs109386328	36575886	36596672	20786	0.10096	Milk	36589609	36589613	QTL_ID=148083	trait=Milk_fat_percentage	Abbrev=FP
27	block_71_chr_27	rs109654144	rs109386328	36575886	36596672	20786	0.10096	Milk	36589657	36589661	QTL_ID=147978	trait=Milk_fat_percentage	Abbrev=FP
27	block_71_chr_27	rs109654144	rs109386328	36575886	36596672	20786	0.10096	Milk	36589759	36589763	QTL_ID=148025	trait=Milk_fat_percentage	Abbrev=FP
27	block_71_chr_27	rs109654144	rs109386328	36575886	36596672	20786	0.10096	Milk	36590116	36590120	QTL_ID=147936	trait=Milk_fat_percentage	Abbrev=FP
27	block_71_chr_27	rs109654144	rs109386328	36575886	36596672	20786	0.10096	Milk	36590129	36590133	QTL_ID=147822	trait=Milk_fat_percentage	Abbrev=FP
27	block_71_chr_27	rs109654144	rs109386328	36575886	36596672	20786	0.10096	Milk	36590469	36590473	QTL_ID=147814	trait=Milk_fat_percentage	Abbrev=FP
27	block_71_chr_27	rs109654144	rs109386328	36575886	36596672	20786	0.10096	Milk	36590655	36590659	QTL_ID=147763	trait=Milk_fat_percentage	Abbrev=FP
27	block_71_chr_27	rs109654144	rs109386328	36575886	36596672	20786	0.10096	Milk	36590925	36590929	QTL_ID=147994	trait=Milk_fat_percentage	Abbrev=FP
27	block_71_chr_27	rs109654144	rs109386328	36575886	36596672	20786	0.10096	Milk	36591543	36591547	QTL_ID=147775	trait=Milk_fat_percentage	Abbrev=FP
27	block_71_chr_27	rs109654144	rs109386328	36575886	36596672	20786	0.10096	Milk	36592554	36592558	QTL_ID=147996	trait=Milk_fat_percentage	Abbrev=FP
27	block_71_chr_27	rs109654144	rs109386328	36575886	36596672	20786	0.10096	Milk	36593073	36593077	QTL_ID=147782	trait=Milk_fat_percentage	Abbrev=FP
27	block_71_chr_27	rs109654144	rs109386328	36575886	36596672	20786	0.10096	Milk	36595214	36595218	QTL_ID=147790	trait=Milk_fat_percentage	Abbrev=FP
27	block_71_chr_27	rs109654144	rs109386328	36575886	36596672	20786	0.10096	Milk	36596670	36596674	QTL_ID=175923	trait=Milk_fat_yield	Abbrev=FY	breed=brown_swiss
28	block_53_chr_28	rs42145039	rs42144386	27704605	27743768	39163	0.08224	Production	27743766	27743770	QTL_ID=23943	trait=Body_weight_(birth)	Abbrev=BW

## Sheet: Haplotypes_LD0.80_top_0.01%
Genes overlapped with the top 0.001% markers in percentage of variance explained
Chromosome	Marker	Start_SNP (marker)	END_SNP (marker)	Start_Position (marker)	End_Position (marker)	Size_in_kb(marker)	%Variance_explained	Ensembl_gene_ID	Start_Position (gene)	End_Position (gene)	Gene_name	Gene_type
1	block_6_chr_1	rs110593395	rs43214743	4250046	4276065	26019	0.18639	ENSBTAG00000017839	4192104	4358253	TIAM1	protein_coding
1	block_170_chr_1	rs43021837	rs110353875	144444371	144464756	20385	0.17222	ENSBTAG00000018607	144441578	144619108	TSPEAR	protein_coding
2	block_111_chr_2	rs108972532	rs109230217	106563514	106595383	31869	0.1877	ENSBTAG00000003807	106532969	106566527	CNOT9	protein_coding
2	block_111_chr_2	rs108972532	rs109230217	106563514	106595383	31869	0.1877	ENSBTAG00000003809	106575924	106598631	PLCD4	protein_coding
4	block_40_chr_4	rs43389354	rs42765191	44268015	44304396	36381	0.17488	ENSBTAG00000016324	44146960	44363428	FBXL13	protein_coding
4	block_40_chr_4	rs43389354	rs42765191	44268015	44304396	36381	0.17488	ENSBTAG00000024379	44155991	44279731	LRRC17	protein_coding
5	block_102_chr_5	rs29018295	rs110389557	116055346	116078264	22918	0.16366	ENSBTAG00000009351	116028707	116169393	ATXN10	protein_coding
6	block_102_chr_6	rs109165576	rs110841030	71206985	71230710	23725	0.21738	ENSBTAG00000044850	71213166	71213267	U6	snRNA
7	block_116_chr_7	rs109398264	rs41658549	95763928	95785453	21525	0.16336	ENSBTAG00000020843	95746303	95790112	PCSK1	protein_coding
8	block_95_chr_8	rs42247568	rs42247551	80713685	80740003	26318	0.18188	ENSBTAG00000000738	80710910	80921735	DAPK1	protein_coding
9	block_83_chr_9	rs41623532	rs41662459	69236440	69270585	34145	0.15906	ENSBTAG00000000240	69203273	69325807	AKAP7	protein_coding
10	block_22_chr_10	rs43625710	rs43075230	28151110	28179409	28299	0.19443	ENSBTAG00000048446	28173165	28174150	OR4F63B	pseudogene
10	block_22_chr_10	rs43625710	rs43075230	28151110	28179409	28299	0.19443	ENSBTAG00000051475	28160076	28161014	OR4F58B	protein_coding
10	block_37_chr_10	rs43626304	rs43625453	44850923	44887038	36115	0.24374	ENSBTAG00000021945	44846568	44939145	NID2	protein_coding
11	block_90_chr_11	rs41588041	rs110397745	50166309	50202868	36559	0.17513	ENSBTAG00000052823	50126392	50191346	lncRNA
11	block_132_chr_11	rs110957579	rs110109644	103406494	103426923	20429	0.16636	ENSBTAG00000006008	103394881	103437809	CAMSAP1	protein_coding
14	block_1_chr_14	rs109752439	rs41630614	305780	330256	24476	0.18329	ENSBTAG00000012353	309282	313478	ZNF34	protein_coding
14	block_1_chr_14	rs109752439	rs41630614	305780	330256	24476	0.18329	ENSBTAG00000026327	321231	324177	RPL8	protein_coding
14	block_31_chr_14	rs41570832	rs41614771	15454870	15481849	26979	0.16668	ENSBTAG00000020407	15383762	15553664	MTSS1	protein_coding
14	block_62_chr_14	rs42382244	rs43089152	38274985	38304478	29493	0.26706	ENSBTAG00000004411	38295064	38345541	CRISPLD1	protein_coding
19	block_37_chr_19	rs110135418	rs109002403	39625810	39654574	28764	0.23493	ENSBTAG00000019347	39590711	39657423	PLXDC1	protein_coding
20	block_35_chr_20	rs42543872	rs42543895	38543545	38571692	28147	0.26579	ENSBTAG00000023529	38369475	38572090	SPEF2	protein_coding
24	block_71_chr_24	rs110964754	rs110520824	60056629	60156074	99445	0.19032	ENSBTAG00000001739	59887828	60100758	CDH20	protein_coding
26	block_3_chr_26	rs41650535	rs110308884	7443726	7467841	24115	0.16895	ENSBTAG00000018404	6899619	8313722	PRKG1	protein_coding
26	block_46_chr_26	rs110214513	rs42101711	46728033	46787804	59771	0.24312	ENSBTAG00000031890	46392481	46948728	DOCK1	protein_coding
QTL overlapped with the top 0.001% markers in percentage of variance explained
Chromosome	Marker	Start_SNP (marker)	END_SNP (marker)	Start_Position (marker)	End_Position (marker)	Size_in_kb(marker)	%Variance_explained	QTL_Type	Start_Position (QTL)	End_Position (QTL)	QTL_ID	Trait_associated	Trait_Abreviation	Breeds_found	Tag_SNP
1	block_6_chr_1	rs110593395	rs43214743	4250046	4276065	26019	0.18639	Production	4250044	4250048	QTL_ID=66725	trait=Body_weight_(yearling)	Abbrev=W365	breed=Hanwoo	rs378493804
1	block_6_chr_1	rs110593395	rs43214743	4250046	4276065	26019	0.18639	Production	4276063	4276067	QTL_ID=66789	trait=Body_weight_(yearling)	Abbrev=W365	breed=charolais	rs43212771
1	block_6_chr_1	rs110593395	rs43214743	4250046	4276065	26019	0.18639	Reproduction	4253948	4253952	QTL_ID=176659	trait=First_service_conception	Abbrev=FSC	breed=holstein	rs132784449
1	block_6_chr_1	rs110593395	rs43214743	4250046	4276065	26019	0.18639	Reproduction	4253948	4253952	QTL_ID=176888	trait=First_service_conception	Abbrev=FSC	breed=holstein	rs43211381,rs41633082
1	block_6_chr_1	rs110593395	rs43214743	4250046	4276065	26019	0.18639	Reproduction	4253948	4253952	QTL_ID=212069	trait=First_service_conception	Abbrev=FSC	breed=blonde_d'aquitaine	rs43765148,rs109811373,rs43210941
1	block_6_chr_1	rs110593395	rs43214743	4250046	4276065	26019	0.18639	Reproduction	4253948	4253952	QTL_ID=212416	trait=Inseminations_per_conception	Abbrev=CONCEPT	breed=holstein	rs41614480
1	block_67_chr_1	rs43238752	rs41575644	64893868	64920298	26430	0.20333	Reproduction	64893866	64893870	QTL_ID=21147	trait=Age_at_puberty	Abbrev=PUBAGE	breed=holstein	rs42462826
1	block_67_chr_1	rs43238752	rs41575644	64893868	64920298	26430	0.20333	Reproduction	64893866	64893870	QTL_ID=29831	trait=Age_at_puberty	Abbrev=PUBAGE	breed=holstein	rs41633081
1	block_67_chr_1	rs43238752	rs41575644	64893868	64920298	26430	0.20333	Reproduction	64920296	64920300	QTL_ID=29833	trait=Age_at_puberty	Abbrev=PUBAGE	breed=holstein	rs29019349
2	block_135_chr_2	rs109419732	rs110911855	129586027	129618238	32211	0.16121	Milk	.	.	QTL_ID=169698	trait=Milk_protein_percentage	Abbrev=PP	breed=hereford,polish_red,red_angus,tarentaise	rs110911855
6	block_1_chr_6	rs110710192	rs41663389	641260	670124	28864	0.16418	Exterior	641258	641262	QTL_ID=41728	trait=Feet_and_leg_conformation	Abbrev=FTLEG	breed=Angus	rs135314769
6	block_1_chr_6	rs110710192	rs41663389	641260	670124	28864	0.16418	Exterior	641258	641262	QTL_ID=41731	trait=Teat_placement_-_front	Abbrev=FTPL	breed=gelbvieh	rs135411900
6	block_1_chr_6	rs110710192	rs41663389	641260	670124	28864	0.16418	Exterior	641258	641262	QTL_ID=41732	trait=Udder_attachment	Abbrev=UA	breed=gelbvieh	rs135640023
6	block_1_chr_6	rs110710192	rs41663389	641260	670124	28864	0.16418	Exterior	641258	641262	QTL_ID=41737	trait=Rear_leg_placement_-_rear_view	Abbrev=RLEGR	breed=gelbvieh	rs136137849
6	block_1_chr_6	rs110710192	rs41663389	641260	670124	28864	0.16418	Exterior	641258	641262	QTL_ID=41738	trait=Teat_placement_-_rear	Abbrev=RTPL	breed=charolais,gelbvieh,hereford,limousin,pinzgauer,red_angus,red_poll,simmental,Angus	rs136190942
6	block_1_chr_6	rs110710192	rs41663389	641260	670124	28864	0.16418	Exterior	641258	641262	QTL_ID=41739	trait=Udder_height	Abbrev=UHT	breed=charolais,gelbvieh,hereford,limousin,pinzgauer,red_angus,red_poll,simmental,Angus	rs136257809
6	block_1_chr_6	rs110710192	rs41663389	641260	670124	28864	0.16418	Exterior	641258	641262	QTL_ID=41741	trait=Stature	Abbrev=STA	breed=charolais,gelbvieh,hereford,limousin,pinzgauer,red_angus,red_poll,simmental,Angus	rs136413048
6	block_1_chr_6	rs110710192	rs41663389	641260	670124	28864	0.16418	Exterior	641258	641262	QTL_ID=41742	trait=Strength	Abbrev=STR	breed=charolais,gelbvieh,hereford,limousin,pinzgauer,red_angus,red_poll,simmental,Angus	rs136416413
6	block_1_chr_6	rs110710192	rs41663389	641260	670124	28864	0.16418	Exterior	641258	641262	QTL_ID=41743	trait=Udder_depth	Abbrev=UDPTH	breed=Girolando	rs136523990
6	block_1_chr_6	rs110710192	rs41663389	641260	670124	28864	0.16418	Milk	641258	641262	QTL_ID=41729	trait=Milk_fat_percentage	Abbrev=FP	breed=holstein	rs135384060
6	block_1_chr_6	rs110710192	rs41663389	641260	670124	28864	0.16418	Milk	641258	641262	QTL_ID=41733	trait=Milk_fat_yield	Abbrev=FY	breed=charolais,gelbvieh,hereford,limousin,pinzgauer,red_angus,red_poll,simmental,Angus	rs135680544
6	block_1_chr_6	rs110710192	rs41663389	641260	670124	28864	0.16418	Milk	641258	641262	QTL_ID=41735	trait=Milk_protein_percentage	Abbrev=PP	breed=holstein	rs135922395
6	block_1_chr_6	rs110710192	rs41663389	641260	670124	28864	0.16418	Milk	641258	641262	QTL_ID=41736	trait=Milk_protein_yield	Abbrev=PY	breed=gelbvieh	rs135937048
6	block_1_chr_6	rs110710192	rs41663389	641260	670124	28864	0.16418	Production	641258	641262	QTL_ID=41726	trait=Body_depth	Abbrev=BD	breed=Hanwoo	rs135125616
6	block_1_chr_6	rs110710192	rs41663389	641260	670124	28864	0.16418	Production	641258	641262	QTL_ID=41730	trait=PTA_type	Abbrev=PTAT	breed=Angus	rs135400595
6	block_1_chr_6	rs110710192	rs41663389	641260	670124	28864	0.16418	Production	641258	641262	QTL_ID=41734	trait=Net_merit	Abbrev=NM	breed=charolais,gelbvieh,hereford,limousin,pinzgauer,red_angus,red_poll,simmental,Angus	rs135688682
6	block_1_chr_6	rs110710192	rs41663389	641260	670124	28864	0.16418	Production	641258	641262	QTL_ID=41740	trait=Rump_width	Abbrev=RUMWD	breed=charolais,gelbvieh,hereford,limousin,pinzgauer,red_angus,red_poll,simmental,Angus	rs136283820
6	block_1_chr_6	rs110710192	rs41663389	641260	670124	28864	0.16418	Reproduction	641258	641262	QTL_ID=41727	trait=Calving_ease_(maternal)	Abbrev=CALEASE	breed=brangus	rs135147861
6	block_102_chr_6	rs109165576	rs110841030	71206985	71230710	23725	0.21738	Exterior	71206983	71206987	QTL_ID=42094	trait=Foot_angle	Abbrev=FANG	breed=holstein	rs134909294
6	block_102_chr_6	rs109165576	rs110841030	71206985	71230710	23725	0.21738	Exterior	71206983	71206987	QTL_ID=42095	trait=Feet_and_leg_conformation	Abbrev=FTLEG	breed=holstein	rs135618950
6	block_102_chr_6	rs109165576	rs110841030	71206985	71230710	23725	0.21738	Exterior	71206983	71206987	QTL_ID=42098	trait=Teat_placement_-_front	Abbrev=FTPL	breed=holstein	rs135268913
6	block_102_chr_6	rs109165576	rs110841030	71206985	71230710	23725	0.21738	Exterior	71206983	71206987	QTL_ID=42099	trait=Udder_attachment	Abbrev=UA	breed=holstein	rs135476693
6	block_102_chr_6	rs109165576	rs110841030	71206985	71230710	23725	0.21738	Exterior	71206983	71206987	QTL_ID=42105	trait=Rear_leg_placement_-_rear_view	Abbrev=RLEGR	breed=holstein	rs43472177
6	block_102_chr_6	rs109165576	rs110841030	71206985	71230710	23725	0.21738	Exterior	71206983	71206987	QTL_ID=42106	trait=Udder_height	Abbrev=UHT	breed=holstein	rs43472180
6	block_102_chr_6	rs109165576	rs110841030	71206985	71230710	23725	0.21738	Exterior	71206983	71206987	QTL_ID=42110	trait=Stature	Abbrev=STA	breed=holstein	rs134319416
6	block_102_chr_6	rs109165576	rs110841030	71206985	71230710	23725	0.21738	Exterior	71206983	71206987	QTL_ID=42111	trait=Strength	Abbrev=STR	breed=holstein	rs110707460
6	block_102_chr_6	rs109165576	rs110841030	71206985	71230710	23725	0.21738	Exterior	71206983	71206987	QTL_ID=42112	trait=Udder_depth	Abbrev=UDPTH	breed=holstein	rs134319416
6	block_102_chr_6	rs109165576	rs110841030	71206985	71230710	23725	0.21738	Exterior	71230708	71230712	QTL_ID=42115	trait=Foot_angle	Abbrev=FANG	breed=holstein	rs110707460
6	block_102_chr_6	rs109165576	rs110841030	71206985	71230710	23725	0.21738	Exterior	71230708	71230712	QTL_ID=42116	trait=Feet_and_leg_conformation	Abbrev=FTLEG	breed=holstein	rs134319416
6	block_102_chr_6	rs109165576	rs110841030	71206985	71230710	23725	0.21738	Exterior	71230708	71230712	QTL_ID=42119	trait=Teat_placement_-_front	Abbrev=FTPL	breed=holstein	rs137439073
6	block_102_chr_6	rs109165576	rs110841030	71206985	71230710	23725	0.21738	Exterior	71230708	71230712	QTL_ID=42120	trait=Udder_attachment	Abbrev=UA	breed=holstein	rs137439073
6	block_102_chr_6	rs109165576	rs110841030	71206985	71230710	23725	0.21738	Exterior	71230708	71230712	QTL_ID=42126	trait=Rear_leg_placement_-_rear_view	Abbrev=RLEGR	breed=holstein	rs110354582
6	block_102_chr_6	rs109165576	rs110841030	71206985	71230710	23725	0.21738	Exterior	71230708	71230712	QTL_ID=42127	trait=Udder_height	Abbrev=UHT	breed=holstein	rs110354582
6	block_102_chr_6	rs109165576	rs110841030	71206985	71230710	23725	0.21738	Exterior	71230708	71230712	QTL_ID=42131	trait=Stature	Abbrev=STA	breed=holstein	rs43472217
6	block_102_chr_6	rs109165576	rs110841030	71206985	71230710	23725	0.21738	Exterior	71230708	71230712	QTL_ID=42132	trait=Strength	Abbrev=STR	breed=holstein	rs43472218
6	block_102_chr_6	rs109165576	rs110841030	71206985	71230710	23725	0.21738	Exterior	71230708	71230712	QTL_ID=42133	trait=Udder_depth	Abbrev=UDPTH	breed=holstein	rs43472218
6	block_102_chr_6	rs109165576	rs110841030	71206985	71230710	23725	0.21738	Milk	71206983	71206987	QTL_ID=42096	trait=Milk_fat_percentage	Abbrev=FP	breed=holstein	rs133878827
6	block_102_chr_6	rs109165576	rs110841030	71206985	71230710	23725	0.21738	Milk	71206983	71206987	QTL_ID=42100	trait=Milk_fat_yield	Abbrev=FY	breed=holstein	rs43472157
6	block_102_chr_6	rs109165576	rs110841030	71206985	71230710	23725	0.21738	Milk	71206983	71206987	QTL_ID=42103	trait=Milk_protein_percentage	Abbrev=PP	breed=holstein	rs137327740
6	block_102_chr_6	rs109165576	rs110841030	71206985	71230710	23725	0.21738	Milk	71206983	71206987	QTL_ID=42104	trait=Milk_protein_yield	Abbrev=PY	breed=holstein	rs43472176
6	block_102_chr_6	rs109165576	rs110841030	71206985	71230710	23725	0.21738	Milk	71230708	71230712	QTL_ID=42117	trait=Milk_fat_percentage	Abbrev=FP	breed=holstein	rs110707460
6	block_102_chr_6	rs109165576	rs110841030	71206985	71230710	23725	0.21738	Milk	71230708	71230712	QTL_ID=42121	trait=Milk_fat_yield	Abbrev=FY	breed=holstein	rs137439073
6	block_102_chr_6	rs109165576	rs110841030	71206985	71230710	23725	0.21738	Milk	71230708	71230712	QTL_ID=42124	trait=Milk_protein_percentage	Abbrev=PP	breed=holstein	rs110091883
6	block_102_chr_6	rs109165576	rs110841030	71206985	71230710	23725	0.21738	Milk	71230708	71230712	QTL_ID=42125	trait=Milk_protein_yield	Abbrev=PY	breed=holstein	rs110091883
6	block_102_chr_6	rs109165576	rs110841030	71206985	71230710	23725	0.21738	Production	71206983	71206987	QTL_ID=42092	trait=Body_depth	Abbrev=BD	breed=holstein	rs29001782
6	block_102_chr_6	rs109165576	rs110841030	71206985	71230710	23725	0.21738	Production	71206983	71206987	QTL_ID=42097	trait=PTA_type	Abbrev=PTAT	breed=holstein	rs134397439
6	block_102_chr_6	rs109165576	rs110841030	71206985	71230710	23725	0.21738	Production	71206983	71206987	QTL_ID=42101	trait=Net_merit	Abbrev=NM	breed=holstein	rs137625453
6	block_102_chr_6	rs109165576	rs110841030	71206985	71230710	23725	0.21738	Production	71206983	71206987	QTL_ID=42102	trait=Length_of_productive_life	Abbrev=PL	breed=holstein	rs135966324
6	block_102_chr_6	rs109165576	rs110841030	71206985	71230710	23725	0.21738	Production	71206983	71206987	QTL_ID=42107	trait=Rump_width	Abbrev=RUMWD	breed=holstein	rs379452380
6	block_102_chr_6	rs109165576	rs110841030	71206985	71230710	23725	0.21738	Production	71230708	71230712	QTL_ID=42113	trait=Body_depth	Abbrev=BD	breed=holstein	rs110707460
6	block_102_chr_6	rs109165576	rs110841030	71206985	71230710	23725	0.21738	Production	71230708	71230712	QTL_ID=42118	trait=PTA_type	Abbrev=PTAT	breed=holstein	rs110707460
6	block_102_chr_6	rs109165576	rs110841030	71206985	71230710	23725	0.21738	Production	71230708	71230712	QTL_ID=42122	trait=Net_merit	Abbrev=NM	breed=holstein	rs137439073
6	block_102_chr_6	rs109165576	rs110841030	71206985	71230710	23725	0.21738	Production	71230708	71230712	QTL_ID=42123	trait=Length_of_productive_life	Abbrev=PL	breed=holstein	rs110091883
6	block_102_chr_6	rs109165576	rs110841030	71206985	71230710	23725	0.21738	Production	71230708	71230712	QTL_ID=42128	trait=Rump_width	Abbrev=RUMWD	breed=holstein	rs110354582
6	block_102_chr_6	rs109165576	rs110841030	71206985	71230710	23725	0.21738	Production	.	.	QTL_ID=181936	trait=Dry_matter_intake	Abbrev=DMI	breed=charolais,gelbvieh,hereford,limousin,pinzgauer,red_angus,red_poll,simmental,Angus	rs109165576
6	block_102_chr_6	rs109165576	rs110841030	71206985	71230710	23725	0.21738	Production	.	.	QTL_ID=182379	trait=Dry_matter_intake	Abbrev=DMI	breed=Angus	rs110841030
6	block_102_chr_6	rs109165576	rs110841030	71206985	71230710	23725	0.21738	Production	.	.	QTL_ID=184562	trait=Average_daily_gain	Abbrev=ADG	breed=charolais,gelbvieh,hereford,limousin,pinzgauer,red_angus,red_poll,simmental,Angus	rs110841030
6	block_102_chr_6	rs109165576	rs110841030	71206985	71230710	23725	0.21738	Production	.	.	QTL_ID=185307	trait=Average_daily_gain	Abbrev=ADG	breed=Maine-Anjou	rs110841030
6	block_102_chr_6	rs109165576	rs110841030	71206985	71230710	23725	0.21738	Production	.	.	QTL_ID=185502	trait=Average_daily_gain	Abbrev=ADG	breed=norwegian_red	rs109165576
6	block_102_chr_6	rs109165576	rs110841030	71206985	71230710	23725	0.21738	Production	.	.	QTL_ID=185746	trait=Average_daily_gain	Abbrev=ADG	breed=norwegian_red	rs109165576
6	block_102_chr_6	rs109165576	rs110841030	71206985	71230710	23725	0.21738	Production	.	.	QTL_ID=185966	trait=Average_daily_gain	Abbrev=ADG	breed=Wagyu	rs109165576
6	block_102_chr_6	rs109165576	rs110841030	71206985	71230710	23725	0.21738	Production	.	.	QTL_ID=187366	trait=Metabolic_body_weight	Abbrev=MBW	breed=charolais,gelbvieh,hereford,limousin,pinzgauer,red_angus,red_poll,simmental,Angus	rs110841030
6	block_102_chr_6	rs109165576	rs110841030	71206985	71230710	23725	0.21738	Production	.	.	QTL_ID=187474	trait=Metabolic_body_weight	Abbrev=MBW	breed=charolais,gelbvieh,hereford,limousin,simmental,Angus	rs110841030
6	block_102_chr_6	rs109165576	rs110841030	71206985	71230710	23725	0.21738	Production	.	.	QTL_ID=188492	trait=Metabolic_body_weight	Abbrev=MBW	breed=norwegian_red	rs110841030
6	block_102_chr_6	rs109165576	rs110841030	71206985	71230710	23725	0.21738	Production	.	.	QTL_ID=188805	trait=Metabolic_body_weight	Abbrev=MBW	breed=charolais,gelbvieh,hereford,limousin,simmental,Angus	rs109165576
6	block_102_chr_6	rs109165576	rs110841030	71206985	71230710	23725	0.21738	Production	.	.	QTL_ID=189289	trait=Metabolic_body_weight	Abbrev=MBW	breed=norwegian_red	rs109165576
6	block_102_chr_6	rs109165576	rs110841030	71206985	71230710	23725	0.21738	Production	.	.	QTL_ID=189510	trait=Metabolic_body_weight	Abbrev=MBW	breed=holstein	rs110841030
6	block_102_chr_6	rs109165576	rs110841030	71206985	71230710	23725	0.21738	Production	.	.	QTL_ID=189637	trait=Metabolic_body_weight	Abbrev=MBW	breed=norwegian_red	rs109165576
6	block_102_chr_6	rs109165576	rs110841030	71206985	71230710	23725	0.21738	Reproduction	71206983	71206987	QTL_ID=42093	trait=Calving_ease_(maternal)	Abbrev=CALEASE	breed=holstein	rs134909294
6	block_102_chr_6	rs109165576	rs110841030	71206985	71230710	23725	0.21738	Reproduction	71206983	71206987	QTL_ID=42108	trait=Calving_ease	Abbrev=CALEASE	breed=holstein	rs452449360
6	block_102_chr_6	rs109165576	rs110841030	71206985	71230710	23725	0.21738	Reproduction	71206983	71206987	QTL_ID=42109	trait=Stillbirth	Abbrev=SB	breed=holstein	rs110707460
6	block_102_chr_6	rs109165576	rs110841030	71206985	71230710	23725	0.21738	Reproduction	71230708	71230712	QTL_ID=42114	trait=Calving_ease_(maternal)	Abbrev=CALEASE	breed=holstein	rs134319416
6	block_102_chr_6	rs109165576	rs110841030	71206985	71230710	23725	0.21738	Reproduction	71230708	71230712	QTL_ID=42129	trait=Calving_ease	Abbrev=CALEASE	breed=holstein	rs110354582
6	block_102_chr_6	rs109165576	rs110841030	71206985	71230710	23725	0.21738	Reproduction	71230708	71230712	QTL_ID=42130	trait=Stillbirth	Abbrev=SB	breed=holstein	rs43472218
7	block_113_chr_7	rs41605716	rs41580804	89523902	89546406	22504	0.27178	Exterior	89523900	89523904	QTL_ID=43369	trait=Dairy_form	Abbrev=DYF	breed=brahman	rs29025644,rs110378393
7	block_113_chr_7	rs41605716	rs41580804	89523902	89546406	22504	0.27178	Exterior	89523900	89523904	QTL_ID=43370	trait=Feet_and_leg_conformation	Abbrev=FTLEG	breed=charolais,chianina,gelbvieh,hereford,holstein,limousin,piedmontese,red_angus,simmental,Angus,Maine-Anjou	rs43643999,rs109559045
7	block_113_chr_7	rs41605716	rs41580804	89523902	89546406	22504	0.27178	Exterior	89523900	89523904	QTL_ID=43372	trait=Teat_placement_-_front	Abbrev=FTPL	breed=holstein	rs41656867,rs109989268
7	block_113_chr_7	rs41605716	rs41580804	89523902	89546406	22504	0.27178	Exterior	89523900	89523904	QTL_ID=43373	trait=Udder_attachment	Abbrev=UA	breed=holstein	rs43642998,rs43650173
7	block_113_chr_7	rs41605716	rs41580804	89523902	89546406	22504	0.27178	Exterior	89523900	89523904	QTL_ID=43374	trait=Rear_leg_placement_-_rear_view	Abbrev=RLEGR	breed=holstein	rs109914287,rs43650187
7	block_113_chr_7	rs41605716	rs41580804	89523902	89546406	22504	0.27178	Exterior	89523900	89523904	QTL_ID=43375	trait=Teat_placement_-_rear	Abbrev=RTPL	breed=charolais,chianina,gelbvieh,hereford,holstein,limousin,piedmontese,red_angus,simmental,Angus,Maine-Anjou	rs110179938,rs110169119
7	block_113_chr_7	rs41605716	rs41580804	89523902	89546406	22504	0.27178	Exterior	89523900	89523904	QTL_ID=43376	trait=Udder_height	Abbrev=UHT	breed=charolais,gelbvieh,hereford,limousin,pinzgauer,red_angus,red_poll,simmental,Angus	rs110201865,rs110056495
7	block_113_chr_7	rs41605716	rs41580804	89523902	89546406	22504	0.27178	Exterior	89523900	89523904	QTL_ID=43378	trait=Stature	Abbrev=STA	breed=charolais,gelbvieh,hereford,limousin,pinzgauer,red_angus,red_poll,simmental,Angus	rs43642675,rs43643308
7	block_113_chr_7	rs41605716	rs41580804	89523902	89546406	22504	0.27178	Exterior	89523900	89523904	QTL_ID=43379	trait=Strength	Abbrev=STR	breed=charolais,gelbvieh,hereford,limousin,pinzgauer,red_angus,red_poll,simmental,Angus	rs41593885,rs110566925
7	block_113_chr_7	rs41605716	rs41580804	89523902	89546406	22504	0.27178	Exterior	89523900	89523904	QTL_ID=43380	trait=Udder_cleft	Abbrev=UC	breed=holstein	rs43647828,rs42868836
7	block_113_chr_7	rs41605716	rs41580804	89523902	89546406	22504	0.27178	Exterior	89523900	89523904	QTL_ID=43381	trait=Udder_depth	Abbrev=UDPTH	breed=holstein	rs110584450,rs109103352
7	block_113_chr_7	rs41605716	rs41580804	89523902	89546406	22504	0.27178	Exterior	89546404	89546408	QTL_ID=43383	trait=Dairy_form	Abbrev=DYF	breed=holstein	rs132960291,rs110702652,rs136362611
7	block_113_chr_7	rs41605716	rs41580804	89523902	89546406	22504	0.27178	Exterior	89546404	89546408	QTL_ID=43384	trait=Feet_and_leg_conformation	Abbrev=FTLEG	breed=charolais,gelbvieh,hereford,limousin,pinzgauer,red_angus,red_poll,simmental,Angus	rs132960291,rs110702652,rs136362611
7	block_113_chr_7	rs41605716	rs41580804	89523902	89546406	22504	0.27178	Exterior	89546404	89546408	QTL_ID=43386	trait=Teat_placement_-_front	Abbrev=FTPL	breed=ayrshire,danish_red,holstein,jersey,norwegian_red,Swedish_Red-and-White	rs43619255,rs41655411,rs43614585
7	block_113_chr_7	rs41605716	rs41580804	89523902	89546406	22504	0.27178	Exterior	89546404	89546408	QTL_ID=43387	trait=Udder_attachment	Abbrev=UA	breed=holstein	rs135198463,rs41597142,rs136081666
7	block_113_chr_7	rs41605716	rs41580804	89523902	89546406	22504	0.27178	Exterior	89546404	89546408	QTL_ID=43388	trait=Rear_leg_placement_-_rear_view	Abbrev=RLEGR	breed=holstein	rs109898540
7	block_113_chr_7	rs41605716	rs41580804	89523902	89546406	22504	0.27178	Exterior	89546404	89546408	QTL_ID=43389	trait=Teat_placement_-_rear	Abbrev=RTPL	breed=holstein	rs109755494
7	block_113_chr_7	rs41605716	rs41580804	89523902	89546406	22504	0.27178	Exterior	89546404	89546408	QTL_ID=43390	trait=Udder_height	Abbrev=UHT	breed=holstein	rs109220955
7	block_113_chr_7	rs41605716	rs41580804	89523902	89546406	22504	0.27178	Exterior	89546404	89546408	QTL_ID=43392	trait=Stature	Abbrev=STA	breed=holstein	rs29022040
7	block_113_chr_7	rs41605716	rs41580804	89523902	89546406	22504	0.27178	Exterior	89546404	89546408	QTL_ID=43393	trait=Strength	Abbrev=STR	breed=holstein	rs137826123
7	block_113_chr_7	rs41605716	rs41580804	89523902	89546406	22504	0.27178	Exterior	89546404	89546408	QTL_ID=43394	trait=Udder_cleft	Abbrev=UC	breed=brahman	rs133252628
7	block_113_chr_7	rs41605716	rs41580804	89523902	89546406	22504	0.27178	Exterior	89546404	89546408	QTL_ID=43395	trait=Udder_depth	Abbrev=UDPTH	breed=brahman	rs137713131
7	block_113_chr_7	rs41605716	rs41580804	89523902	89546406	22504	0.27178	Production	89523900	89523904	QTL_ID=43368	trait=Body_depth	Abbrev=BD	breed=blonde_d'aquitaine	rs42802606,rs41656325
7	block_113_chr_7	rs41605716	rs41580804	89523902	89546406	22504	0.27178	Production	89523900	89523904	QTL_ID=43371	trait=PTA_type	Abbrev=PTAT	breed=charolais,chianina,gelbvieh,hereford,holstein,limousin,piedmontese,red_angus,simmental,Angus,Maine-Anjou	rs43642952,rs43637279
7	block_113_chr_7	rs41605716	rs41580804	89523902	89546406	22504	0.27178	Production	89523900	89523904	QTL_ID=43377	trait=Rump_width	Abbrev=RUMWD	breed=Angus	rs110838923,rs41594273
7	block_113_chr_7	rs41605716	rs41580804	89523902	89546406	22504	0.27178	Production	89546404	89546408	QTL_ID=43382	trait=Body_depth	Abbrev=BD	breed=holstein	rs43643837,rs42868892
7	block_113_chr_7	rs41605716	rs41580804	89523902	89546406	22504	0.27178	Production	89546404	89546408	QTL_ID=43385	trait=PTA_type	Abbrev=PTAT	breed=holstein	rs43619255,rs41655411,rs43614585
7	block_113_chr_7	rs41605716	rs41580804	89523902	89546406	22504	0.27178	Production	89546404	89546408	QTL_ID=43391	trait=Rump_width	Abbrev=RUMWD	breed=holstein	rs137527434
11	block_90_chr_11	rs41588041	rs110397745	50166309	50202868	36559	0.17513	Production	50202866	50202870	QTL_ID=68310	trait=Body_weight_gain	Abbrev=BWG	breed=simmental	rs41603335
11	block_132_chr_11	rs110957579	rs110109644	103406494	103426923	20429	0.16636	Milk	103406492	103406496	QTL_ID=130654	trait=Cheese_protein_recovery	Abbrev=RECPROT	breed=jersey	rs110364197
11	block_132_chr_11	rs110957579	rs110109644	103406494	103426923	20429	0.16636	Milk	103410397	103410401	QTL_ID=114049	trait=Milk_beta-lactoglobulin_percentage	Abbrev=MBLGP	breed=holstein	rs110364197
14	block_1_chr_14	rs109752439	rs41630614	305780	330256	24476	0.18329	Health	305778	305782	QTL_ID=135436	trait=Heat_tolerance	Abbrev=HEATT	breed=jersey	rs137601646
14	block_1_chr_14	rs109752439	rs41630614	305780	330256	24476	0.18329	Health	330254	330258	QTL_ID=179886	trait=Ketosis	Abbrev=KETO	breed=brown_swiss	rs110076086,rs110574072
14	block_1_chr_14	rs109752439	rs41630614	305780	330256	24476	0.18329	Milk	305778	305782	QTL_ID=102229	trait=Milk_yield	Abbrev=MY	breed=jersey	rs109206036
14	block_1_chr_14	rs109752439	rs41630614	305780	330256	24476	0.18329	Milk	305778	305782	QTL_ID=102532	trait=Milk_fat_yield	Abbrev=FY	breed=holstein	rs207598277
14	block_1_chr_14	rs109752439	rs41630614	305780	330256	24476	0.18329	Milk	305778	305782	QTL_ID=103334	trait=Milk_protein_yield	Abbrev=PY	breed=holstein	rs465417325
14	block_1_chr_14	rs109752439	rs41630614	305780	330256	24476	0.18329	Milk	305778	305782	QTL_ID=103502	trait=Milk_fat_percentage	Abbrev=FP	breed=holstein	rs110889885
14	block_1_chr_14	rs109752439	rs41630614	305780	330256	24476	0.18329	Milk	305778	305782	QTL_ID=104731	trait=Milk_protein_percentage	Abbrev=PP	breed=holstein	rs41573240
14	block_1_chr_14	rs109752439	rs41630614	305780	330256	24476	0.18329	Milk	305778	305782	QTL_ID=109028	trait=Milk_casein_percentage	Abbrev=MCASP	breed=holstein	rs380926636
14	block_1_chr_14	rs109752439	rs41630614	305780	330256	24476	0.18329	Milk	305778	305782	QTL_ID=14950	trait=Milk_yield	Abbrev=MY	breed=holstein	rs134860368
14	block_1_chr_14	rs109752439	rs41630614	305780	330256	24476	0.18329	Milk	305778	305782	QTL_ID=14955	trait=Milk_protein_yield	Abbrev=PY	breed=holstein	rs109546980,rs41566855
14	block_1_chr_14	rs109752439	rs41630614	305780	330256	24476	0.18329	Milk	305778	305782	QTL_ID=14958	trait=Milk_fat_percentage	Abbrev=FP	breed=holstein	rs109082027
14	block_1_chr_14	rs109752439	rs41630614	305780	330256	24476	0.18329	Milk	305778	305782	QTL_ID=156987	trait=Milk_fat_yield	Abbrev=FY	breed=brown_swiss	rs41833730
14	block_1_chr_14	rs109752439	rs41630614	305780	330256	24476	0.18329	Milk	305778	305782	QTL_ID=161562	trait=Milk_cholesterol_content	Abbrev=MCHOL	breed=jersey	rs42228465,rs41635275
14	block_1_chr_14	rs109752439	rs41630614	305780	330256	24476	0.18329	Milk	305778	305782	QTL_ID=166922	trait=Milk_yield	Abbrev=MY	breed=jersey	rs136489503,rs133813605
14	block_1_chr_14	rs109752439	rs41630614	305780	330256	24476	0.18329	Milk	305778	305782	QTL_ID=166933	trait=Milk_fat_percentage	Abbrev=FP	breed=holstein	rs42228465,rs41635275
14	block_1_chr_14	rs109752439	rs41630614	305780	330256	24476	0.18329	Milk	305778	305782	QTL_ID=167438	trait=Milk_fat_percentage	Abbrev=FP	breed=jersey	rs41635270
14	block_1_chr_14	rs109752439	rs41630614	305780	330256	24476	0.18329	Milk	305778	305782	QTL_ID=168186	trait=305-day_milk_yield	Abbrev=MY305	breed=ayrshire,danish_red,Swedish_Red-and-White	rs41723505
14	block_1_chr_14	rs109752439	rs41630614	305780	330256	24476	0.18329	Milk	305778	305782	QTL_ID=170205	trait=305-day_milk_yield	Abbrev=MY305	breed=jersey	rs42228465,rs41635275
14	block_1_chr_14	rs109752439	rs41630614	305780	330256	24476	0.18329	Milk	305778	305782	QTL_ID=173576	trait=Milk_fat_percentage	Abbrev=FP	breed=ayrshire,danish_red,Swedish_Red-and-White	rs41624797
14	block_1_chr_14	rs109752439	rs41630614	305780	330256	24476	0.18329	Milk	305778	305782	QTL_ID=174143	trait=Milk_fat_yield	Abbrev=FY	breed=ayrshire,danish_red,Swedish_Red-and-White	rs208451123
14	block_1_chr_14	rs109752439	rs41630614	305780	330256	24476	0.18329	Milk	305778	305782	QTL_ID=174530	trait=Milk_yield	Abbrev=MY	breed=holstein	rs109029802
14	block_1_chr_14	rs109752439	rs41630614	305780	330256	24476	0.18329	Milk	305778	305782	QTL_ID=174924	trait=Milk_protein_percentage	Abbrev=PP	breed=ayrshire,danish_red,Swedish_Red-and-White	rs109594688
14	block_1_chr_14	rs109752439	rs41630614	305780	330256	24476	0.18329	Milk	305778	305782	QTL_ID=175499	trait=Milk_protein_yield	Abbrev=PY	breed=holstein	rs137269124,rs42410442
14	block_1_chr_14	rs109752439	rs41630614	305780	330256	24476	0.18329	Milk	305778	305782	QTL_ID=176464	trait=Milk_yield	Abbrev=MY	breed=holstein	rs109257200
14	block_1_chr_14	rs109752439	rs41630614	305780	330256	24476	0.18329	Milk	305778	305782	QTL_ID=20881	trait=Milk_fat-to-protein_ratio	Abbrev=MFPRAT	breed=ayrshire,danish_red,Swedish_Red-and-White	rs133020056
14	block_1_chr_14	rs109752439	rs41630614	305780	330256	24476	0.18329	Milk	305778	305782	QTL_ID=25523	trait=Milk_yield	Abbrev=MY	breed=holstein	rs41615088
14	block_1_chr_14	rs109752439	rs41630614	305780	330256	24476	0.18329	Milk	305778	305782	QTL_ID=25922	trait=Milk_fat_yield	Abbrev=FY	breed=holstein	rs41809386
14	block_1_chr_14	rs109752439	rs41630614	305780	330256	24476	0.18329	Milk	305778	305782	QTL_ID=26343	trait=Milk_protein_yield	Abbrev=PY	breed=holstein	rs110136573
14	block_1_chr_14	rs109752439	rs41630614	305780	330256	24476	0.18329	Milk	305778	305782	QTL_ID=26529	trait=Milk_fat_percentage	Abbrev=FP	breed=holstein	rs108979795
14	block_1_chr_14	rs109752439	rs41630614	305780	330256	24476	0.18329	Milk	305778	305782	QTL_ID=26772	trait=Milk_protein_percentage	Abbrev=PP	breed=holstein	rs109712841
14	block_1_chr_14	rs109752439	rs41630614	305780	330256	24476	0.18329	Milk	305778	305782	QTL_ID=27035	trait=Milk_fat_percentage	Abbrev=FP	breed=holstein	rs41623175
14	block_1_chr_14	rs109752439	rs41630614	305780	330256	24476	0.18329	Milk	305778	305782	QTL_ID=31075	trait=Milk_yield	Abbrev=MY	breed=ayrshire,danish_red,Swedish_Red-and-White	rs41724396
14	block_1_chr_14	rs109752439	rs41630614	305780	330256	24476	0.18329	Milk	305778	305782	QTL_ID=31093	trait=Milk_fat_yield	Abbrev=FY	breed=ayrshire,danish_red,Swedish_Red-and-White	rs41724397
14	block_1_chr_14	rs109752439	rs41630614	305780	330256	24476	0.18329	Milk	305778	305782	QTL_ID=32854	trait=Milk_fat_percentage	Abbrev=FP	breed=ayrshire,danish_red,Swedish_Red-and-White	rs41724395
14	block_1_chr_14	rs109752439	rs41630614	305780	330256	24476	0.18329	Milk	305778	305782	QTL_ID=35279	trait=Milk_protein_yield	Abbrev=PY	breed=ayrshire,danish_red,Swedish_Red-and-White	rs41724398
14	block_1_chr_14	rs109752439	rs41630614	305780	330256	24476	0.18329	Milk	305778	305782	QTL_ID=35332	trait=Milk_fat_yield	Abbrev=FY	breed=ayrshire,danish_red,Swedish_Red-and-White	rs41724399
14	block_1_chr_14	rs109752439	rs41630614	305780	330256	24476	0.18329	Milk	305778	305782	QTL_ID=35386	trait=Milk_yield	Abbrev=MY	breed=ayrshire,danish_red,Swedish_Red-and-White	rs41724401
14	block_1_chr_14	rs109752439	rs41630614	305780	330256	24476	0.18329	Milk	305778	305782	QTL_ID=35489	trait=Milk_fat_percentage	Abbrev=FP	breed=ayrshire,danish_red,Swedish_Red-and-White	rs41724396
14	block_1_chr_14	rs109752439	rs41630614	305780	330256	24476	0.18329	Milk	305778	305782	QTL_ID=60838	trait=Milk_fat_percentage	Abbrev=FP	breed=ayrshire,danish_red,Swedish_Red-and-White	rs209702122
14	block_1_chr_14	rs109752439	rs41630614	305780	330256	24476	0.18329	Milk	305778	305782	QTL_ID=60839	trait=Milk_yield	Abbrev=MY	breed=holstein	rs41724385
14	block_1_chr_14	rs109752439	rs41630614	305780	330256	24476	0.18329	Milk	305778	305782	QTL_ID=64284	trait=Milk_riboflavin_content	Abbrev=RIBO	breed=holstein	rs41724387
14	block_1_chr_14	rs109752439	rs41630614	305780	330256	24476	0.18329	Milk	306729	306733	QTL_ID=96759	trait=Milk_yield	Abbrev=MY	breed=ayrshire,danish_red,Swedish_Red-and-White	rs110308401
14	block_1_chr_14	rs109752439	rs41630614	305780	330256	24476	0.18329	Milk	306729	306733	QTL_ID=97751	trait=Milk_fat_yield	Abbrev=FY	breed=ayrshire,danish_red,Swedish_Red-and-White	rs133941363
14	block_1_chr_14	rs109752439	rs41630614	305780	330256	24476	0.18329	Milk	309278	309282	QTL_ID=102257	trait=Milk_yield	Abbrev=MY	breed=holstein	rs109742701
14	block_1_chr_14	rs109752439	rs41630614	305780	330256	24476	0.18329	Milk	309278	309282	QTL_ID=102702	trait=Milk_fat_yield	Abbrev=FY	breed=simmental,Angus	rs41971371
14	block_1_chr_14	rs109752439	rs41630614	305780	330256	24476	0.18329	Milk	309278	309282	QTL_ID=103369	trait=Milk_protein_yield	Abbrev=PY	breed=holstein	rs41638728,rs81173790,rs42252603
14	block_1_chr_14	rs109752439	rs41630614	305780	330256	24476	0.18329	Milk	309278	309282	QTL_ID=103577	trait=Milk_fat_percentage	Abbrev=FP	breed=charolais,gelbvieh,hereford,limousin,pinzgauer,red_angus,red_poll,simmental,Angus	rs110311677
14	block_1_chr_14	rs109752439	rs41630614	305780	330256	24476	0.18329	Milk	309278	309282	QTL_ID=104794	trait=Milk_protein_percentage	Abbrev=PP	breed=holstein	rs29019877
14	block_1_chr_14	rs109752439	rs41630614	305780	330256	24476	0.18329	Milk	309278	309282	QTL_ID=33410	trait=Milk_fat_percentage	Abbrev=FP	breed=ayrshire,danish_red,Swedish_Red-and-White	rs41724391
14	block_1_chr_14	rs109752439	rs41630614	305780	330256	24476	0.18329	Milk	309278	309282	QTL_ID=64285	trait=Milk_riboflavin_content	Abbrev=RIBO	breed=holstein	rs41724388
14	block_1_chr_14	rs109752439	rs41630614	305780	330256	24476	0.18329	Milk	310316	310320	QTL_ID=35122	trait=Milk_yield	Abbrev=MY	breed=ayrshire,danish_red,Swedish_Red-and-White	rs41724397
14	block_1_chr_14	rs109752439	rs41630614	305780	330256	24476	0.18329	Milk	310316	310320	QTL_ID=35123	trait=Milk_protein_yield	Abbrev=PY	breed=ayrshire,danish_red,Swedish_Red-and-White	rs41724398
14	block_1_chr_14	rs109752439	rs41630614	305780	330256	24476	0.18329	Milk	310316	310320	QTL_ID=35124	trait=Milk_fat_percentage	Abbrev=FP	breed=ayrshire,danish_red,Swedish_Red-and-White	rs41724399
14	block_1_chr_14	rs109752439	rs41630614	305780	330256	24476	0.18329	Milk	310316	310320	QTL_ID=35125	trait=Milk_protein_percentage	Abbrev=PP	breed=ayrshire,danish_red,Swedish_Red-and-White	rs41724398
14	block_1_chr_14	rs109752439	rs41630614	305780	330256	24476	0.18329	Milk	310759	310763	QTL_ID=102258	trait=Milk_yield	Abbrev=MY	breed=holstein	rs43714156
14	block_1_chr_14	rs109752439	rs41630614	305780	330256	24476	0.18329	Milk	310759	310763	QTL_ID=102703	trait=Milk_fat_yield	Abbrev=FY	breed=ayrshire,danish_red,Swedish_Red-and-White	rs110956939
14	block_1_chr_14	rs109752439	rs41630614	305780	330256	24476	0.18329	Milk	310759	310763	QTL_ID=103370	trait=Milk_protein_yield	Abbrev=PY	breed=holstein	rs110397182
14	block_1_chr_14	rs109752439	rs41630614	305780	330256	24476	0.18329	Milk	310759	310763	QTL_ID=103578	trait=Milk_fat_percentage	Abbrev=FP	breed=Angus	rs110311677
14	block_1_chr_14	rs109752439	rs41630614	305780	330256	24476	0.18329	Milk	310759	310763	QTL_ID=104795	trait=Milk_protein_percentage	Abbrev=PP	breed=holstein	rs29019877
14	block_1_chr_14	rs109752439	rs41630614	305780	330256	24476	0.18329	Milk	310759	310763	QTL_ID=33411	trait=Milk_fat_percentage	Abbrev=FP	breed=ayrshire,danish_red,Swedish_Red-and-White	rs41724392
14	block_1_chr_14	rs109752439	rs41630614	305780	330256	24476	0.18329	Milk	310759	310763	QTL_ID=64286	trait=Milk_riboflavin_content	Abbrev=RIBO	breed=holstein	rs136853471
14	block_1_chr_14	rs109752439	rs41630614	305780	330256	24476	0.18329	Milk	311871	311875	QTL_ID=96754	trait=Milk_yield	Abbrev=MY	breed=ayrshire,danish_red,Swedish_Red-and-White	rs109798166
14	block_1_chr_14	rs109752439	rs41630614	305780	330256	24476	0.18329	Milk	311871	311875	QTL_ID=97750	trait=Milk_fat_yield	Abbrev=FY	breed=ayrshire,danish_red,Swedish_Red-and-White	rs136010625
14	block_1_chr_14	rs109752439	rs41630614	305780	330256	24476	0.18329	Milk	313573	313577	QTL_ID=102259	trait=Milk_yield	Abbrev=MY	breed=holstein	rs133320887
14	block_1_chr_14	rs109752439	rs41630614	305780	330256	24476	0.18329	Milk	313573	313577	QTL_ID=102704	trait=Milk_fat_yield	Abbrev=FY	breed=ayrshire,danish_red,Swedish_Red-and-White	rs134395992
14	block_1_chr_14	rs109752439	rs41630614	305780	330256	24476	0.18329	Milk	313573	313577	QTL_ID=103371	trait=Milk_protein_yield	Abbrev=PY	breed=holstein	BM719
14	block_1_chr_14	rs109752439	rs41630614	305780	330256	24476	0.18329	Milk	313573	313577	QTL_ID=103579	trait=Milk_fat_percentage	Abbrev=FP	breed=charolais,holstein	rs110311677
14	block_1_chr_14	rs109752439	rs41630614	305780	330256	24476	0.18329	Milk	313573	313577	QTL_ID=104796	trait=Milk_protein_percentage	Abbrev=PP	breed=charolais,gelbvieh,hereford,limousin,pinzgauer,red_angus,red_poll,simmental,Angus	rs29019877
14	block_1_chr_14	rs109752439	rs41630614	305780	330256	24476	0.18329	Milk	313573	313577	QTL_ID=33412	trait=Milk_fat_percentage	Abbrev=FP	breed=ayrshire,danish_red,Swedish_Red-and-White	rs41724402
14	block_1_chr_14	rs109752439	rs41630614	305780	330256	24476	0.18329	Milk	313573	313577	QTL_ID=64287	trait=Milk_riboflavin_content	Abbrev=RIBO	breed=ayrshire,danish_red,Swedish_Red-and-White	rs41724402
14	block_1_chr_14	rs109752439	rs41630614	305780	330256	24476	0.18329	Milk	315496	315500	QTL_ID=97056	trait=Milk_yield	Abbrev=MY	breed=dutch_friesian	rs109610449
14	block_1_chr_14	rs109752439	rs41630614	305780	330256	24476	0.18329	Milk	315496	315500	QTL_ID=97753	trait=Milk_fat_yield	Abbrev=FY	breed=ayrshire,danish_red,Swedish_Red-and-White	rs137269124
14	block_1_chr_14	rs109752439	rs41630614	305780	330256	24476	0.18329	Milk	320717	320721	QTL_ID=102260	trait=Milk_yield	Abbrev=MY	breed=holstein	rs41635148
14	block_1_chr_14	rs109752439	rs41630614	305780	330256	24476	0.18329	Milk	320717	320721	QTL_ID=102705	trait=Milk_fat_yield	Abbrev=FY	breed=ayrshire,danish_red,Swedish_Red-and-White	rs134395992
14	block_1_chr_14	rs109752439	rs41630614	305780	330256	24476	0.18329	Milk	320717	320721	QTL_ID=103372	trait=Milk_protein_yield	Abbrev=PY	breed=holstein	BM719
14	block_1_chr_14	rs109752439	rs41630614	305780	330256	24476	0.18329	Milk	320717	320721	QTL_ID=103580	trait=Milk_fat_percentage	Abbrev=FP	breed=holstein	rs110311677
14	block_1_chr_14	rs109752439	rs41630614	305780	330256	24476	0.18329	Milk	320717	320721	QTL_ID=104797	trait=Milk_protein_percentage	Abbrev=PP	breed=holstein	rs29019877
14	block_1_chr_14	rs109752439	rs41630614	305780	330256	24476	0.18329	Milk	320717	320721	QTL_ID=200511	trait=Milk_palmitic_acid_content	Abbrev=MFA-C16:0	breed=holstein	rs133745374
14	block_1_chr_14	rs109752439	rs41630614	305780	330256	24476	0.18329	Milk	320717	320721	QTL_ID=205688	trait=Milk_palmitoleic_acid_content	Abbrev=MFA-C16:1	breed=holstein	rs109325079
14	block_1_chr_14	rs109752439	rs41630614	305780	330256	24476	0.18329	Milk	320717	320721	QTL_ID=205689	trait=Milk_oleic_acid_content	Abbrev=MFA-C18:1	breed=holstein	rs109325079
14	block_1_chr_14	rs109752439	rs41630614	305780	330256	24476	0.18329	Milk	320717	320721	QTL_ID=205690	trait=Milk_linoleic_acid_content	Abbrev=MFA-C18:2	breed=holstein	rs109325079
14	block_1_chr_14	rs109752439	rs41630614	305780	330256	24476	0.18329	Milk	320717	320721	QTL_ID=205691	trait=Milk_conjugated_linoleic_acid_content	Abbrev=CLAC18:2	breed=holstein	rs109325079
14	block_1_chr_14	rs109752439	rs41630614	305780	330256	24476	0.18329	Milk	320717	320721	QTL_ID=33433	trait=Milk_fat_percentage	Abbrev=FP	breed=ayrshire,danish_red,Swedish_Red-and-White	rs41724405
14	block_1_chr_14	rs109752439	rs41630614	305780	330256	24476	0.18329	Milk	320717	320721	QTL_ID=64288	trait=Milk_riboflavin_content	Abbrev=RIBO	breed=ayrshire,danish_red,Swedish_Red-and-White	rs41724404
14	block_1_chr_14	rs109752439	rs41630614	305780	330256	24476	0.18329	Milk	324498	324502	QTL_ID=35178	trait=Milk_yield	Abbrev=MY	breed=ayrshire,danish_red,Swedish_Red-and-White	rs41724406
14	block_1_chr_14	rs109752439	rs41630614	305780	330256	24476	0.18329	Milk	324498	324502	QTL_ID=35179	trait=Milk_protein_yield	Abbrev=PY	breed=ayrshire,danish_red,Swedish_Red-and-White	rs41724405
14	block_1_chr_14	rs109752439	rs41630614	305780	330256	24476	0.18329	Milk	324498	324502	QTL_ID=35180	trait=Milk_fat_percentage	Abbrev=FP	breed=ayrshire,danish_red,Swedish_Red-and-White	rs41724406
14	block_1_chr_14	rs109752439	rs41630614	305780	330256	24476	0.18329	Milk	325289	325293	QTL_ID=102261	trait=Milk_yield	Abbrev=MY	breed=Wagyu	rs41635148
14	block_1_chr_14	rs109752439	rs41630614	305780	330256	24476	0.18329	Milk	325289	325293	QTL_ID=102706	trait=Milk_fat_yield	Abbrev=FY	breed=ayrshire,danish_red,Swedish_Red-and-White	rs476345002
14	block_1_chr_14	rs109752439	rs41630614	305780	330256	24476	0.18329	Milk	325289	325293	QTL_ID=103373	trait=Milk_protein_yield	Abbrev=PY	breed=Angus	BM719
14	block_1_chr_14	rs109752439	rs41630614	305780	330256	24476	0.18329	Milk	325289	325293	QTL_ID=103581	trait=Milk_fat_percentage	Abbrev=FP	breed=hereford,Angus	rs110311677
14	block_1_chr_14	rs109752439	rs41630614	305780	330256	24476	0.18329	Milk	325289	325293	QTL_ID=104798	trait=Milk_protein_percentage	Abbrev=PP	breed=holstein	rs29019877
14	block_1_chr_14	rs109752439	rs41630614	305780	330256	24476	0.18329	Milk	325289	325293	QTL_ID=200485	trait=Milk_palmitic_acid_content	Abbrev=MFA-C16:0	breed=holstein	rs133745374
14	block_1_chr_14	rs109752439	rs41630614	305780	330256	24476	0.18329	Milk	325289	325293	QTL_ID=205637	trait=Milk_palmitoleic_acid_content	Abbrev=MFA-C16:1	breed=holstein	rs110140569
14	block_1_chr_14	rs109752439	rs41630614	305780	330256	24476	0.18329	Milk	325289	325293	QTL_ID=205638	trait=Milk_oleic_acid_content	Abbrev=MFA-C18:1	breed=holstein	rs110140569
14	block_1_chr_14	rs109752439	rs41630614	305780	330256	24476	0.18329	Milk	325289	325293	QTL_ID=205639	trait=Milk_linoleic_acid_content	Abbrev=MFA-C18:2	breed=holstein	rs110140569
14	block_1_chr_14	rs109752439	rs41630614	305780	330256	24476	0.18329	Milk	325289	325293	QTL_ID=205640	trait=Milk_conjugated_linoleic_acid_content	Abbrev=CLAC18:2	breed=holstein	rs109325079
14	block_1_chr_14	rs109752439	rs41630614	305780	330256	24476	0.18329	Milk	330254	330258	QTL_ID=102256	trait=Milk_yield	Abbrev=MY	breed=holstein	rs135248689
14	block_1_chr_14	rs109752439	rs41630614	305780	330256	24476	0.18329	Milk	330254	330258	QTL_ID=102693	trait=Milk_fat_yield	Abbrev=FY	breed=charolais,gelbvieh,hereford,limousin,pinzgauer,red_angus,red_poll,simmental,Angus	DIK4437,BMS462,BMS462
14	block_1_chr_14	rs109752439	rs41630614	305780	330256	24476	0.18329	Milk	330254	330258	QTL_ID=103382	trait=Milk_protein_yield	Abbrev=PY	breed=holstein	rs42843320
14	block_1_chr_14	rs109752439	rs41630614	305780	330256	24476	0.18329	Milk	330254	330258	QTL_ID=103575	trait=Milk_fat_percentage	Abbrev=FP	breed=jersey	rs110311677
14	block_1_chr_14	rs109752439	rs41630614	305780	330256	24476	0.18329	Milk	330254	330258	QTL_ID=104793	trait=Milk_protein_percentage	Abbrev=PP	breed=brahman	rs29019877
14	block_1_chr_14	rs109752439	rs41630614	305780	330256	24476	0.18329	Milk	330254	330258	QTL_ID=14936	trait=Milk_fat_percentage	Abbrev=FP	breed=holstein	rs109517718
14	block_1_chr_14	rs109752439	rs41630614	305780	330256	24476	0.18329	Milk	330254	330258	QTL_ID=153807	trait=Milk_fat_percentage	Abbrev=FP	breed=brown_swiss	rs42230512
14	block_1_chr_14	rs109752439	rs41630614	305780	330256	24476	0.18329	Milk	330254	330258	QTL_ID=161788	trait=Milk_fat_percentage	Abbrev=FP	breed=brown_swiss	BMS1747,BMS740
14	block_1_chr_14	rs109752439	rs41630614	305780	330256	24476	0.18329	Milk	330254	330258	QTL_ID=166949	trait=Milk_fat_percentage	Abbrev=FP	breed=brown_swiss	rs41833730
14	block_1_chr_14	rs109752439	rs41630614	305780	330256	24476	0.18329	Milk	330254	330258	QTL_ID=173577	trait=Milk_fat_percentage	Abbrev=FP	breed=holstein	rs110828423
14	block_1_chr_14	rs109752439	rs41630614	305780	330256	24476	0.18329	Milk	330254	330258	QTL_ID=174144	trait=Milk_fat_yield	Abbrev=FY	breed=ayrshire,danish_red,Swedish_Red-and-White	rs110543230
14	block_1_chr_14	rs109752439	rs41630614	305780	330256	24476	0.18329	Milk	330254	330258	QTL_ID=174531	trait=Milk_yield	Abbrev=MY	breed=holstein	rs110057993
14	block_1_chr_14	rs109752439	rs41630614	305780	330256	24476	0.18329	Milk	330254	330258	QTL_ID=174925	trait=Milk_protein_percentage	Abbrev=PP	breed=ayrshire,danish_red,Swedish_Red-and-White	rs41661929,rs41612309
14	block_1_chr_14	rs109752439	rs41630614	305780	330256	24476	0.18329	Milk	330254	330258	QTL_ID=175500	trait=Milk_protein_yield	Abbrev=PY	breed=brown_swiss	rs137269124,rs42410442
14	block_1_chr_14	rs109752439	rs41630614	305780	330256	24476	0.18329	Milk	330254	330258	QTL_ID=203588	trait=Milk_palmitic_acid_content	Abbrev=MFA-C16:0	breed=holstein	rs109410010
14	block_1_chr_14	rs109752439	rs41630614	305780	330256	24476	0.18329	Milk	330254	330258	QTL_ID=210058	trait=Milk_palmitoleic_acid_content	Abbrev=MFA-C16:1	breed=holstein	rs110319408
14	block_1_chr_14	rs109752439	rs41630614	305780	330256	24476	0.18329	Milk	330254	330258	QTL_ID=210059	trait=Milk_oleic_acid_content	Abbrev=MFA-C18:1	breed=holstein	rs110319408
14	block_1_chr_14	rs109752439	rs41630614	305780	330256	24476	0.18329	Milk	330254	330258	QTL_ID=210060	trait=Milk_linoleic_acid_content	Abbrev=MFA-C18:2	breed=holstein	rs109410010
14	block_1_chr_14	rs109752439	rs41630614	305780	330256	24476	0.18329	Milk	330254	330258	QTL_ID=210061	trait=Milk_conjugated_linoleic_acid_content	Abbrev=CLAC18:2	breed=holstein	rs110319408
14	block_1_chr_14	rs109752439	rs41630614	305780	330256	24476	0.18329	Milk	330254	330258	QTL_ID=25923	trait=Milk_fat_yield	Abbrev=FY	breed=holstein	rs41986867
14	block_1_chr_14	rs109752439	rs41630614	305780	330256	24476	0.18329	Milk	330254	330258	QTL_ID=26530	trait=Milk_fat_percentage	Abbrev=FP	breed=holstein	rs41788288
14	block_1_chr_14	rs109752439	rs41630614	305780	330256	24476	0.18329	Milk	330254	330258	QTL_ID=33413	trait=Milk_fat_percentage	Abbrev=FP	breed=ayrshire,danish_red,Swedish_Red-and-White	rs381992093
14	block_1_chr_14	rs109752439	rs41630614	305780	330256	24476	0.18329	Milk	330254	330258	QTL_ID=35333	trait=Milk_fat_yield	Abbrev=FY	breed=ayrshire,danish_red,Swedish_Red-and-White	rs41723524
14	block_1_chr_14	rs109752439	rs41630614	305780	330256	24476	0.18329	Milk	330254	330258	QTL_ID=35387	trait=Milk_yield	Abbrev=MY	breed=ayrshire,danish_red,Swedish_Red-and-White	rs381992093
14	block_1_chr_14	rs109752439	rs41630614	305780	330256	24476	0.18329	Milk	330254	330258	QTL_ID=35490	trait=Milk_fat_percentage	Abbrev=FP	breed=ayrshire,danish_red,Swedish_Red-and-White	rs41723524
14	block_1_chr_14	rs109752439	rs41630614	305780	330256	24476	0.18329	Milk	330254	330258	QTL_ID=64289	trait=Milk_riboflavin_content	Abbrev=RIBO	breed=ayrshire,danish_red,Swedish_Red-and-White	rs41723528
14	block_1_chr_14	rs109752439	rs41630614	305780	330256	24476	0.18329	Milk	330254	330258	QTL_ID=95652	trait=Milk_fat_percentage	Abbrev=FP	breed=ayrshire,danish_red,Swedish_Red-and-White	rs137425866
14	block_1_chr_14	rs109752439	rs41630614	305780	330256	24476	0.18329	Milk	.	.	QTL_ID=97255	trait=Milk_yield	Abbrev=MY	breed=holstein	rs109752439
14	block_1_chr_14	rs109752439	rs41630614	305780	330256	24476	0.18329	Milk	.	.	QTL_ID=97399	trait=Milk_yield	Abbrev=MY	breed=holstein	rs109752439
14	block_1_chr_14	rs109752439	rs41630614	305780	330256	24476	0.18329	Milk	.	.	QTL_ID=98246	trait=Milk_fat_yield	Abbrev=FY	breed=jersey	rs41630614
14	block_1_chr_14	rs109752439	rs41630614	305780	330256	24476	0.18329	Reproduction	330254	330258	QTL_ID=212769	trait=Inseminations_per_conception	Abbrev=CONCEPT	breed=brown_swiss	rs29021886
14	block_31_chr_14	rs41570832	rs41614771	15454870	15481849	26979	0.16668	Milk	15481847	15481851	QTL_ID=203560	trait=Milk_palmitic_acid_content	Abbrev=MFA-C16:0	breed=holstein	rs110566502
19	block_45_chr_19	rs41613453	rs42555494	46455674	46516531	60857	0.19387	Milk	46459056	46459060	QTL_ID=196754	trait=Milk_myristic_acid_content	Abbrev=MFA-C14:0	breed=charolais,gelbvieh,hereford,limousin,simmental,Angus	rs41947578
19	block_45_chr_19	rs41613453	rs42555494	46455674	46516531	60857	0.19387	Milk	46502304	46502308	QTL_ID=196252	trait=Milk_capric_acid_content	Abbrev=MFA-C10:0	breed=charolais,gelbvieh,hereford,limousin,simmental,Angus	rs41642647
19	block_45_chr_19	rs41613453	rs42555494	46455674	46516531	60857	0.19387	Milk	46502304	46502308	QTL_ID=196253	trait=Milk_lauric_acid_content	Abbrev=MFA-C12:0	breed=charolais,gelbvieh,hereford,limousin,simmental,Angus	rs132939689
19	block_45_chr_19	rs41613453	rs42555494	46455674	46516531	60857	0.19387	Production	46516529	46516533	QTL_ID=69020	trait=Body_weight_(yearling)	Abbrev=W365	breed=holstein	rs385019017
24	block_71_chr_24	rs110964754	rs110520824	60056629	60156074	99445	0.19032	Milk	60101247	60101251	QTL_ID=113362	trait=Milk_kappa-casein_percentage	Abbrev=MKCASP	breed=ayrshire,danish_red,Swedish_Red-and-White	rs109678718
24	block_71_chr_24	rs110964754	rs110520824	60056629	60156074	99445	0.19032	Milk	60124408	60124412	QTL_ID=112797	trait=Milk_kappa-casein_percentage	Abbrev=MKCASP	breed=ayrshire,danish_red,Swedish_Red-and-White	centromer,BM4505
24	block_71_chr_24	rs110964754	rs110520824	60056629	60156074	99445	0.19032	Production	60056627	60056631	QTL_ID=69279	trait=Body_weight_(yearling)	Abbrev=W365	breed=ayrshire,danish_red,Swedish_Red-and-White	rs109678718
24	block_71_chr_24	rs110964754	rs110520824	60056629	60156074	99445	0.19032	Production	60093949	60093953	QTL_ID=69276	trait=Body_weight_(yearling)	Abbrev=W365	breed=ayrshire,danish_red,Swedish_Red-and-White	rs109678718
25	block_20_chr_25	rs109227319	rs110017755	6080581	6109723	29142	0.21415	Milk	6080579	6080583	QTL_ID=158288	trait=Milking_speed	Abbrev=MSPD	breed=jersey	rs137225796
25	block_20_chr_25	rs109227319	rs110017755	6080581	6109723	29142	0.21415	Milk	6109721	6109725	QTL_ID=158289	trait=Milking_speed	Abbrev=MSPD	breed=jersey	rs137225796
26	block_3_chr_26	rs41650535	rs110308884	7443726	7467841	24115	0.16895	Exterior	7443724	7443728	QTL_ID=52643	trait=Dairy_form	Abbrev=DYF	breed=holstein	rs42092228
26	block_3_chr_26	rs41650535	rs110308884	7443726	7467841	24115	0.16895	Exterior	7443724	7443728	QTL_ID=52646	trait=Teat_placement_-_front	Abbrev=FTPL	breed=holstein	rs42093031
26	block_3_chr_26	rs41650535	rs110308884	7443726	7467841	24115	0.16895	Exterior	7443724	7443728	QTL_ID=52647	trait=Udder_attachment	Abbrev=UA	breed=holstein	rs42092228
26	block_3_chr_26	rs41650535	rs110308884	7443726	7467841	24115	0.16895	Exterior	7443724	7443728	QTL_ID=52648	trait=Teat_placement_-_rear	Abbrev=RTPL	breed=holstein	rs42093031
26	block_3_chr_26	rs41650535	rs110308884	7443726	7467841	24115	0.16895	Exterior	7443724	7443728	QTL_ID=52649	trait=Udder_height	Abbrev=UHT	breed=holstein	rs42092208
26	block_3_chr_26	rs41650535	rs110308884	7443726	7467841	24115	0.16895	Exterior	7443724	7443728	QTL_ID=52650	trait=Udder_cleft	Abbrev=UC	breed=holstein	rs42092213
26	block_3_chr_26	rs41650535	rs110308884	7443726	7467841	24115	0.16895	Production	7443724	7443728	QTL_ID=52645	trait=PTA_type	Abbrev=PTAT	breed=holstein	rs42093031
26	block_3_chr_26	rs41650535	rs110308884	7443726	7467841	24115	0.16895	Reproduction	7443724	7443728	QTL_ID=52644	trait=Daughter_pregnancy_rate	Abbrev=DPR	breed=holstein	rs42092228
26	block_46_chr_26	rs110214513	rs42101711	46728033	46787804	59771	0.24312	Milk	46765746	46765750	QTL_ID=113783	trait=Milk_kappa-casein_percentage	Abbrev=MKCASP	breed=piedmontese
26	block_46_chr_26	rs110214513	rs42101711	46728033	46787804	59771	0.24312	Milk	46765746	46765750	QTL_ID=116938	trait=Milk_glycosylated_kappa-casein_percentage	Abbrev=MGKCASP	breed=charolais,hereford,limousin,simmental,Angus

## Sheet: Haplotypes_LD0.15_top_0.05%
Genes overlapped with the top 0.001% markers in percentage of variance explained
Chromosome	Marker	Start_SNP (marker)	END_SNP (marker)	Start_Position (marker)	End_Position (marker)	Size_in_kb(marker)	%Variance_explained	Ensembl_gene_ID	Start_Position (gene)	End_Position (gene)	Gene_name	Gene_type
1	block_14_chr_1	rs110593395	rs29024375	4250046	4309205	59159	0.05089	ENSBTAG00000017839	4192104	4358253	TIAM1	protein_coding
1	block_14_chr_1	rs110593395	rs29024375	4250046	4309205	59159	0.05089	ENSBTAG00000044299	4288068	4288144	bta-mir-2284i	miRNA
1	block_17_chr_1	rs41628897	rs43209887	4729973	4804971	74998	0.03538	ENSBTAG00000015812	4759050	4760169	KRTAP8-1	protein_coding
1	block_17_chr_1	rs41628897	rs43209887	4729973	4804971	74998	0.03538	ENSBTAG00000046804	4736889	4737152	KRTAP7-1	protein_coding
1	block_17_chr_1	rs41628897	rs43209887	4729973	4804971	74998	0.03538	ENSBTAG00000048503	4770078	4770269	protein_coding
1	block_32_chr_1	rs41255421	rs41584442	9592005	9646618	54613	0.03481	ENSBTAG00000000706	9583345	9592271	ADAMTS1	protein_coding
1	block_56_chr_1	rs42630203	rs29009870	18608496	18692651	84155	0.03385	ENSBTAG00000000597	18567977	18710975	TMPRSS15	protein_coding
1	block_68_chr_1	rs43218341	rs109413103	22568717	22681024	112307	0.03608	ENSBTAG00000002623	22617489	22675629	SAMSN1	protein_coding
1	block_145_chr_1	rs42584386	rs41610345	45182041	45281490	99449	0.05118	ENSBTAG00000016363	45155599	45188354	TFG	protein_coding
1	block_145_chr_1	rs42584386	rs41610345	45182041	45281490	99449	0.05118	ENSBTAG00000026836	45273441	45477104	protein_coding
1	block_224_chr_1	rs41255415	rs108992751	66150690	66188904	38214	0.04046	ENSBTAG00000008862	66151427	66215030	GOLGB1	protein_coding
1	block_231_chr_1	rs109765671	rs41630801	67369224	67423265	54041	0.03458	ENSBTAG00000018877	67411430	67504231	PDIA5	protein_coding
1	block_233_chr_1	rs109261088	rs41579089	67755460	67805608	50148	0.03544	ENSBTAG00000018777	67666437	67823745	ADCY5	protein_coding
1	block_311_chr_1	rs42455329	rs41613169	91673661	91758979	85318	0.05254	ENSBTAG00000048493	91436009	92436553	NAALADL2	protein_coding
1	block_390_chr_1	rs110853931	rs43262256	111137978	111168701	30723	0.03822	ENSBTAG00000018465	111111924	111559606	KCNAB1	protein_coding
1	block_408_chr_1	rs109483880	rs29019947	116654067	116725563	71496	0.07161	ENSBTAG00000015837	116694941	116747192	P2RY12	protein_coding
1	block_408_chr_1	rs109483880	rs29019947	116654067	116725563	71496	0.07161	ENSBTAG00000021703	116654940	117017533	MED12L	protein_coding
1	block_418_chr_1	rs43265648	rs41635984	118603687	118638525	34838	0.04564	ENSBTAG00000007814	118469263	118642804	WWTR1	protein_coding
1	block_455_chr_1	rs110677938	rs43268082	130171002	130225374	54372	0.04276	ENSBTAG00000031277	130185388	130186521	FOXL2	protein_coding
1	block_481_chr_1	rs109208747	rs110873867	137271780	137305479	33699	0.04646	ENSBTAG00000011634	137242683	137294481	ACP3	protein_coding
1	block_515_chr_1	rs41643473	rs110353875	144372951	144464756	91805	0.03482	ENSBTAG00000017882	144424403	144426734	LRRC3	protein_coding
1	block_515_chr_1	rs41643473	rs110353875	144372951	144464756	91805	0.03482	ENSBTAG00000018607	144441578	144619108	TSPEAR	protein_coding
1	block_515_chr_1	rs41643473	rs110353875	144372951	144464756	91805	0.03482	ENSBTAG00000021901	144361187	144410547	TRPM2	protein_coding
1	block_515_chr_1	rs41643473	rs110353875	144372951	144464756	91805	0.03482	ENSBTAG00000046909	144408383	144408423	snoRNA
1	block_577_chr_1	rs109668017	rs41617748	156644833	156682865	38032	0.06578	ENSBTAG00000012798	156340497	156841779	KCNH8	protein_coding
2	block_11_chr_2	rs41591798	rs109431065	1936492	1996646	60154	0.03509	ENSBTAG00000000941	1920239	1969794	PLEKHB2	protein_coding
2	block_137_chr_2	rs41659239	rs110742273	30330208	30360263	30055	0.03565	ENSBTAG00000016512	30336543	30434725	TTC21B	protein_coding
2	block_152_chr_2	rs110704770	rs41645054	34395444	34432100	36656	0.03542	ENSBTAG00000048246	34382575	34466656	DPP4	protein_coding
2	block_186_chr_2	rs109375626	rs29011345	46563141	46601272	38131	0.04479	ENSBTAG00000015962	46549089	46565933	MMADHC	protein_coding
2	block_199_chr_2	rs41637157	rs110332891	51969199	52075912	106713	0.03921	ENSBTAG00000049534	51979361	51979561	misc_RNA
2	block_199_chr_2	rs41637157	rs110332891	51969199	52075912	106713	0.03921	ENSBTAG00000052907	52034403	52097225	lncRNA
2	block_222_chr_2	rs42931120	rs42927614	56256033	56280961	24928	0.0384	ENSBTAG00000024632	55584017	56790873	LRP1B	protein_coding
2	block_275_chr_2	rs41567710	rs42977041	69519578	69575725	56147	0.03658	ENSBTAG00000010221	69565219	69664403	CCDC93	protein_coding
2	block_275_chr_2	rs41567710	rs42977041	69519578	69575725	56147	0.03658	ENSBTAG00000016785	69535964	69553834	protein_coding
2	block_293_chr_2	rs42432634	rs41626000	76216871	76255186	38315	0.0338	ENSBTAG00000031898	76113318	76921405	CNTNAP5	protein_coding
2	block_327_chr_2	rs110545131	rs110597851	86685861	86732417	46556	0.04807	ENSBTAG00000007635	86319697	86686609	PLCL1	protein_coding
2	block_451_chr_2	rs109309637	rs109780234	127218611	127238953	20342	0.03808	ENSBTAG00000021781	127238786	127253787	MTFR1L	protein_coding
2	block_451_chr_2	rs109309637	rs109780234	127218611	127238953	20342	0.03808	ENSBTAG00000021786	127225459	127237892	AUNIP	protein_coding
2	block_451_chr_2	rs109309637	rs109780234	127218611	127238953	20342	0.03808	ENSBTAG00000021787	127217390	127222938	PAQR7	protein_coding
2	block_456_chr_2	rs110916024	rs110295483	128428771	128458001	29230	0.04381	ENSBTAG00000013048	128445501	128496459	NIPAL3	protein_coding
3	block_5_chr_3	rs109120506	rs109791607	1196759	1219749	22990	0.03522	ENSBTAG00000012700	1182748	1266862	CD247	protein_coding
3	block_69_chr_3	rs41658158	rs109099725	26066448	26126232	59784	0.03447	ENSBTAG00000001748	26099795	26109125	TRIM45	protein_coding
3	block_69_chr_3	rs41658158	rs109099725	26066448	26126232	59784	0.03447	ENSBTAG00000014466	26012214	26074278	VTCN1	protein_coding
3	block_69_chr_3	rs41658158	rs109099725	26066448	26126232	59784	0.03447	ENSBTAG00000015392	26126025	26179583	TTF2	protein_coding
3	block_136_chr_3	rs43117607	rs42586854	46613397	46680174	66777	0.03741	ENSBTAG00000008809	46655713	46739928	PTBP2	protein_coding
3	block_144_chr_3	rs43339412	rs110384429	48234094	48285929	51835	0.07392	ENSBTAG00000021537	48239823	48252404	RWDD3	protein_coding
3	block_160_chr_3	rs41590476	rs110287131	55022327	55053697	31370	0.03437	ENSBTAG00000000504	55014449	55045556	GTF2B	protein_coding
3	block_218_chr_3	rs42576165	rs42576134	68508313	68534718	26405	0.03331	ENSBTAG00000053587	68318239	68570134	protein_coding
3	block_287_chr_3	rs109973160	rs41615093	86426227	86584978	158751	0.03298	ENSBTAG00000030669	86213982	86718004	FGGY	protein_coding
3	block_320_chr_3	rs43350848	rs109726753	92054056	92123920	69864	0.05919	ENSBTAG00000020036	92081757	92090351	CDCP2	protein_coding
3	block_320_chr_3	rs43350848	rs109726753	92054056	92123920	69864	0.05919	ENSBTAG00000020037	92033900	92060024	CYB5RL	protein_coding
3	block_412_chr_3	rs110783401	rs109572605	112221070	112257692	36622	0.04264	ENSBTAG00000005784	111603940	112289188	CSMD2	protein_coding
3	block_420_chr_3	rs110656886	rs42460993	113880893	113901073	20180	0.07112	ENSBTAG00000054838	113885085	113894870	lncRNA
3	block_452_chr_3	rs109475915	rs43370810	120380233	120402371	22138	0.05541	ENSBTAG00000000789	120373077	120389112	PPP1R7	protein_coding
4	block_9_chr_4	rs109608127	rs109583632	5395651	5422821	27170	0.04146	ENSBTAG00000020869	5336436	5441308	DDC	protein_coding
4	block_46_chr_4	rs41659143	rs41659140	15935175	15961687	26512	0.08244	ENSBTAG00000043805	15943455	15943556	5S_rRNA	rRNA
4	block_46_chr_4	rs41659143	rs41659140	15935175	15961687	26512	0.08244	ENSBTAG00000047004	15734909	15991563	UMAD1	protein_coding
4	block_122_chr_4	rs42169452	rs110203552	36966333	36990307	23974	0.03454	ENSBTAG00000014920	36966817	37237011	SEMA3E	protein_coding
4	block_147_chr_4	rs109333469	rs109930663	43907326	43942271	34945	0.0447	ENSBTAG00000009341	43916446	44057818	CCDC146	protein_coding
4	block_147_chr_4	rs109333469	rs109930663	43907326	43942271	34945	0.0447	ENSBTAG00000018430	43815426	43913447	GSAP	protein_coding
4	block_177_chr_4	rs109564513	rs109969311	51149352	51179378	30026	0.0327	ENSBTAG00000008097	51105613	51149684	WNT2	protein_coding
4	block_177_chr_4	rs109564513	rs109969311	51149352	51179378	30026	0.0327	ENSBTAG00000010756	51165809	51456320	ST7	protein_coding
4	block_183_chr_4	rs29019875	rs110304724	52488450	52510424	21974	0.03664	ENSBTAG00000014228	52282339	52499410	TFEC	protein_coding
4	block_219_chr_4	rs43402375	rs43400956	61247646	61322228	74582	0.05941	ENSBTAG00000001182	61204174	61302729	SEPTIN7	protein_coding
4	block_219_chr_4	rs43402375	rs43400956	61247646	61322228	74582	0.05941	ENSBTAG00000051302	61259466	61259572	U6	snRNA
4	block_288_chr_4	rs41615291	rs43745280	80279100	80347612	68512	0.0346	ENSBTAG00000032121	80159127	80928936	SUGCT	protein_coding
4	block_291_chr_4	rs41599805	rs41654185	80520587	80544515	23928	0.06319	ENSBTAG00000032121	80159127	80928936	SUGCT	protein_coding
4	block_383_chr_4	rs109961694	rs108987844	104402564	104440941	38377	0.04389	ENSBTAG00000051724	104316587	104452633	protein_coding
4	block_416_chr_4	rs110004783	rs110012029	113718615	113741071	22456	0.03499	ENSBTAG00000011120	113721311	113742660	GBX1	protein_coding
4	block_416_chr_4	rs110004783	rs110012029	113718615	113741071	22456	0.03499	ENSBTAG00000016752	113719034	113761445	ASB10	protein_coding
5	block_29_chr_5	rs29010908	rs41606105	7630921	7711343	80422	0.03756	ENSBTAG00000009852	7300922	7681263	NAV3	protein_coding
5	block_29_chr_5	rs29010908	rs41606105	7630921	7711343	80422	0.03756	ENSBTAG00000054695	7680890	7681971	protein_coding
5	block_80_chr_5	rs41655885	rs110423902	27744207	27773400	29193	0.03571	ENSBTAG00000007204	27732717	27757234	KRT80	protein_coding
5	block_92_chr_5	rs29002549	rs29003499	30184122	30204315	20193	0.05086	ENSBTAG00000016589	30202309	30240990	PRPF40B	protein_coding
5	block_92_chr_5	rs29002549	rs29003499	30184122	30204315	20193	0.05086	ENSBTAG00000016593	30151294	30202352	FMNL3	protein_coding
5	block_180_chr_5	rs109739902	rs109980961	73581692	73619330	37638	0.03818	ENSBTAG00000045785	73547847	73588700	TOM1	protein_coding
5	block_285_chr_5	rs109505514	rs29018725	112126293	112165809	39516	0.03474	ENSBTAG00000006204	112115956	112159105	XPNPEP3	protein_coding
5	block_285_chr_5	rs109505514	rs29018725	112126293	112165809	39516	0.03474	ENSBTAG00000053583	112162636	112176251	RBX1	protein_coding
5	block_302_chr_5	rs110844659	rs109886869	116015434	116134185	118751	0.03469	ENSBTAG00000009351	116028707	116169393	ATXN10	protein_coding
5	block_303_chr_5	rs109513912	rs110659119	116391317	116448403	57086	0.0411	ENSBTAG00000008063	116438987	116507065	PPARA	protein_coding
5	block_303_chr_5	rs109513912	rs110659119	116391317	116448403	57086	0.0411	ENSBTAG00000029772	116408410	116408483	bta-let-7a-3	miRNA
5	block_303_chr_5	rs109513912	rs110659119	116391317	116448403	57086	0.0411	ENSBTAG00000036417	116409213	116409295	bta-mir-3596	miRNA
5	block_303_chr_5	rs109513912	rs110659119	116391317	116448403	57086	0.0411	ENSBTAG00000045309	116408665	116408737	bta-mir-2443	miRNA
5	block_303_chr_5	rs109513912	rs110659119	116391317	116448403	57086	0.0411	ENSBTAG00000048921	116413475	116415908	lncRNA
5	block_303_chr_5	rs109513912	rs110659119	116391317	116448403	57086	0.0411	ENSBTAG00000050704	116385087	116399415	lncRNA
5	block_307_chr_5	rs108949981	rs109986509	117155996	117194502	38506	0.03875	ENSBTAG00000012291	116973678	117230659	TBC1D22A	protein_coding
5	block_323_chr_5	rs43036671	rs41657101	119406813	119463301	56488	0.03468	ENSBTAG00000011098	119392379	119450153	TTLL8	protein_coding
5	block_323_chr_5	rs43036671	rs41657101	119406813	119463301	56488	0.03468	ENSBTAG00000021626	119451454	119473072	MLC1	protein_coding
6	block_26_chr_6	rs43144276	rs110461142	4671403	4732343	60940	0.04278	ENSBTAG00000012111	4526911	4777589	PRDM5	protein_coding
6	block_30_chr_6	rs109435946	rs42928688	6399976	6482619	82643	0.04249	ENSBTAG00000006434	6233764	6435034	SYNPO2	protein_coding
6	block_30_chr_6	rs109435946	rs42928688	6399976	6482619	82643	0.04249	ENSBTAG00000055099	6435122	6444715	lncRNA
6	block_34_chr_6	rs43444992	rs41650750	7438139	7474743	36604	0.06035	ENSBTAG00000051854	7441167	7459597	lncRNA
6	block_48_chr_6	rs29016355	rs109535979	11539567	11577471	37904	0.03923	ENSBTAG00000017808	11555988	11639287	ARSJ	protein_coding
6	block_58_chr_6	rs108980492	rs109475571	13072385	13132427	60042	0.03446	ENSBTAG00000034875	13098687	13220016	ALPK1	protein_coding
6	block_99_chr_6	rs41633202	rs108944781	22571656	22681971	110315	0.06601	ENSBTAG00000054853	22648797	22649060	processed_pseudogene
6	block_104_chr_6	rs42547296	rs41664505	23503327	23564107	60780	0.04494	ENSBTAG00000016005	23444708	23767842	PPP3CA	protein_coding
6	block_118_chr_6	rs108944957	rs110131710	29357249	29406846	49597	0.03733	ENSBTAG00000002081	29373117	29593444	BMPR1B	protein_coding
6	block_118_chr_6	rs108944957	rs110131710	29357249	29406846	49597	0.03733	ENSBTAG00000002084	29166321	29361530	UNC5C	protein_coding
6	block_157_chr_6	rs29027071	rs43463262	39797151	39858450	61299	0.03538	ENSBTAG00000005108	39779895	40182890	SLIT2	protein_coding
6	block_173_chr_6	rs110435700	rs41983246	42004652	42037316	32664	0.04902	ENSBTAG00000004653	41984735	42116814	ADGRA3	protein_coding
6	block_277_chr_6	rs110544210	rs109709749	69771283	69826263	54980	0.03423	ENSBTAG00000007173	69723655	69771549	PDGFRA	protein_coding
6	block_284_chr_6	rs41653830	rs110841030	71172594	71230710	58116	0.04083	ENSBTAG00000044850	71213166	71213267	U6	snRNA
6	block_334_chr_6	rs42555873	rs42553820	90627043	90685779	58736	0.0359	ENSBTAG00000017028	90560691	90641879	USO1	protein_coding
6	block_334_chr_6	rs42555873	rs42553820	90627043	90685779	58736	0.0359	ENSBTAG00000032074	90680644	90680807	U1	snRNA
6	block_345_chr_6	rs109614068	rs43476044	92911232	92955785	44553	0.04268	ENSBTAG00000010716	92951310	93291875	FRAS1	protein_coding
6	block_397_chr_6	rs110670051	rs109188808	104267648	104310525	42877	0.04401	ENSBTAG00000010875	104281506	104285802	MSX1	protein_coding
6	block_442_chr_6	rs43490816	rs41590968	113197600	113217685	20085	0.03797	ENSBTAG00000003766	113216655	113218143	BLOC1S4	protein_coding
6	block_451_chr_6	rs41574391	rs109657313	114785574	114812953	27379	0.05508	ENSBTAG00000014803	114791954	114816294	CPZ	protein_coding
6	block_458_chr_6	rs110891954	rs109120338	115765863	115871184	105321	0.03547	ENSBTAG00000001504	115790395	115806223	NOP14	protein_coding
6	block_458_chr_6	rs110891954	rs109120338	115765863	115871184	105321	0.03547	ENSBTAG00000001505	115732951	115790351	GRK4	protein_coding
6	block_458_chr_6	rs110891954	rs109120338	115765863	115871184	105321	0.03547	ENSBTAG00000021128	115811540	115902662	ADD1	protein_coding
6	block_458_chr_6	rs110891954	rs109120338	115765863	115871184	105321	0.03547	ENSBTAG00000021130	115807625	115811707	MFSD10	protein_coding
6	block_458_chr_6	rs110891954	rs109120338	115765863	115871184	105321	0.03547	ENSBTAG00000054167	115864575	115864681	U6	snRNA
7	block_31_chr_7	rs109207355	rs109551981	5535313	5587078	51765	0.04707	ENSBTAG00000012678	5543272	5566733	COLGALT1	protein_coding
7	block_31_chr_7	rs109207355	rs109551981	5535313	5587078	51765	0.04707	ENSBTAG00000018946	5568730	5586773	NIBAN3	protein_coding
7	block_61_chr_7	rs109815065	rs109755265	16688700	16720758	32058	0.0525	ENSBTAG00000000613	16714677	16752222	ELAVL1	protein_coding
7	block_61_chr_7	rs109815065	rs109755265	16688700	16720758	32058	0.0525	ENSBTAG00000015567	16680584	16695716	TIMM44	protein_coding
7	block_61_chr_7	rs109815065	rs109755265	16688700	16720758	32058	0.0525	ENSBTAG00000044869	16711356	16711431	bta-mir-2455	miRNA
7	block_61_chr_7	rs109815065	rs109755265	16688700	16720758	32058	0.0525	ENSBTAG00000049345	16712681	16712756	bta-mir-10178	miRNA
7	block_73_chr_7	rs110410267	rs110249839	20264097	20382516	118419	0.04879	ENSBTAG00000000710	20261476	20311632	PIP5K1C	protein_coding
7	block_73_chr_7	rs110410267	rs110249839	20264097	20382516	118419	0.04879	ENSBTAG00000008789	20353044	20358586	HMG20B	protein_coding
7	block_73_chr_7	rs110410267	rs110249839	20264097	20382516	118419	0.04879	ENSBTAG00000010373	20313628	20324899	CACTIN	protein_coding
7	block_73_chr_7	rs110410267	rs110249839	20264097	20382516	118419	0.04879	ENSBTAG00000014944	20334826	20343537	TBXA2R	protein_coding
7	block_73_chr_7	rs110410267	rs110249839	20264097	20382516	118419	0.04879	ENSBTAG00000014979	20369007	20378072	MFSD12	protein_coding
7	block_73_chr_7	rs110410267	rs110249839	20264097	20382516	118419	0.04879	ENSBTAG00000014982	20379062	20382521	C7H19orf71	protein_coding
7	block_73_chr_7	rs110410267	rs110249839	20264097	20382516	118419	0.04879	ENSBTAG00000050809	20346684	20350042	GIPC3	protein_coding
7	block_73_chr_7	rs110410267	rs110249839	20264097	20382516	118419	0.04879	ENSBTAG00000053812	20343967	20346465	protein_coding
7	block_139_chr_7	rs43514144	rs109876733	37324655	37352736	28081	0.03287	ENSBTAG00000020489	37316829	37446102	SEMA6A	protein_coding
7	block_139_chr_7	rs43514144	rs109876733	37324655	37352736	28081	0.03287	ENSBTAG00000037229	37342761	37342879	5S_rRNA	rRNA
7	block_142_chr_7	rs42488684	rs41630389	37581897	37710008	128111	0.04091	ENSBTAG00000019071	37598772	37783067	COMMD10	protein_coding
7	block_142_chr_7	rs42488684	rs41630389	37581897	37710008	128111	0.04091	ENSBTAG00000054664	37573462	37592163	lncRNA
7	block_166_chr_7	rs41575808	rs109886610	43085607	43105247	19640	0.06461	ENSBTAG00000047560	43101617	43102879	C2CD4C	protein_coding
7	block_167_chr_7	rs41591943	rs109427038	43163282	43217648	54366	0.03276	ENSBTAG00000002098	43173660	43180341	CDC34	protein_coding
7	block_167_chr_7	rs41591943	rs109427038	43163282	43217648	54366	0.03276	ENSBTAG00000002100	43181976	43188286	GZMM	protein_coding
7	block_167_chr_7	rs41591943	rs109427038	43163282	43217648	54366	0.03276	ENSBTAG00000010772	43164988	43168955	TPGS1	protein_coding
7	block_167_chr_7	rs41591943	rs109427038	43163282	43217648	54366	0.03276	ENSBTAG00000015050	43213783	43234084	HCN2	protein_coding
7	block_167_chr_7	rs41591943	rs109427038	43163282	43217648	54366	0.03276	ENSBTAG00000016648	43201562	43208656	BSG	protein_coding
7	block_167_chr_7	rs41591943	rs109427038	43163282	43217648	54366	0.03276	ENSBTAG00000039355	43158741	43163414	MADCAM1	protein_coding
7	block_222_chr_7	rs110504063	rs41627905	59101278	59173723	72445	0.05396	ENSBTAG00000004153	59111440	59114995	SCGB3A2	protein_coding
7	block_222_chr_7	rs110504063	rs41627905	59101278	59173723	72445	0.05396	ENSBTAG00000015465	59134895	59147099	C7H5orf46	protein_coding
7	block_241_chr_7	rs109247392	rs43520880	62376253	62450104	73851	0.04401	ENSBTAG00000002834	62434491	62469969	CCDC69	protein_coding
7	block_241_chr_7	rs109247392	rs43520880	62376253	62450104	73851	0.04401	ENSBTAG00000014809	62357582	62404880	ANXA6	protein_coding
7	block_291_chr_7	rs41613284	rs109190810	75350671	75380152	29481	0.05965	ENSBTAG00000050903	75358284	75359460	protein_coding
7	block_351_chr_7	rs109398264	rs41658542	95763928	95844936	81008	0.03908	ENSBTAG00000020843	95746303	95790112	PCSK1	protein_coding
7	block_351_chr_7	rs109398264	rs41658542	95763928	95844936	81008	0.03908	ENSBTAG00000049969	95791030	95955111	lncRNA
7	block_385_chr_7	rs43536043	rs41658074	106557340	106624724	67384	0.04187	ENSBTAG00000016515	106497219	106784981	EFNA5	protein_coding
7	block_392_chr_7	rs41565850	rs41619208	108132999	108207357	74358	0.03821	ENSBTAG00000003051	107827212	108280766	FER	protein_coding
8	block_23_chr_8	rs111028471	rs41622366	8618577	8658263	39686	0.04758	ENSBTAG00000004134	8587781	8618663	C8H8orf74	protein_coding
8	block_27_chr_8	rs41638903	rs110713930	9477100	9576222	99122	0.04505	ENSBTAG00000017232	9440963	9630218	KIF13B	protein_coding
8	block_98_chr_8	rs109481932	rs42325801	27824273	27859677	35404	0.03622	ENSBTAG00000003669	27468468	27944404	BNC2	protein_coding
8	block_159_chr_8	rs43553193	rs41654687	43970992	43998136	27144	0.03951	ENSBTAG00000010976	43770176	43988755	KANK1	protein_coding
8	block_168_chr_8	rs42482997	rs110470172	45735954	45792230	56276	0.03542	ENSBTAG00000008877	45576614	45814041	APBA1	protein_coding
8	block_219_chr_8	rs110196254	rs110839325	59747078	59814993	67915	0.03557	ENSBTAG00000011403	59723669	59785504	RUSC2	protein_coding
8	block_219_chr_8	rs110196254	rs110839325	59747078	59814993	67915	0.03557	ENSBTAG00000011406	59795969	59801419	TESK1	protein_coding
8	block_219_chr_8	rs110196254	rs110839325	59747078	59814993	67915	0.03557	ENSBTAG00000011409	59799960	59808752	CD72	protein_coding
8	block_219_chr_8	rs110196254	rs110839325	59747078	59814993	67915	0.03557	ENSBTAG00000032509	59785446	59787520	FAM166B	protein_coding
8	block_219_chr_8	rs110196254	rs110839325	59747078	59814993	67915	0.03557	ENSBTAG00000049403	59769431	59769489	bta-mir-2285da	miRNA
8	block_300_chr_8	rs42247568	rs42247551	80713685	80740003	26318	0.03412	ENSBTAG00000000738	80710910	80921735	DAPK1	protein_coding
8	block_322_chr_8	rs43289386	rs109029673	85540348	85603530	63182	0.03711	ENSBTAG00000005017	85538948	85540420	ZNF169	protein_coding
8	block_322_chr_8	rs43289386	rs109029673	85540348	85603530	63182	0.03711	ENSBTAG00000031359	85569397	85573428	protein_coding
8	block_332_chr_8	rs41624988	rs29021328	88966749	89097170	130421	0.03287	ENSBTAG00000011375	88931759	89113202	SHC3	protein_coding
8	block_409_chr_8	rs43581101	rs108998958	110185962	110289532	103570	0.0352	ENSBTAG00000000712	110162117	110188746	FBXW2	protein_coding
8	block_409_chr_8	rs43581101	rs108998958	110185962	110289532	103570	0.0352	ENSBTAG00000016952	110195834	110217114	PSMD5	protein_coding
8	block_409_chr_8	rs43581101	rs108998958	110185962	110289532	103570	0.0352	ENSBTAG00000016958	110242266	110260664	PHF19	protein_coding
8	block_409_chr_8	rs43581101	rs108998958	110185962	110289532	103570	0.0352	ENSBTAG00000038486	110190747	110194281	B3GALT9	protein_coding
8	block_409_chr_8	rs43581101	rs108998958	110185962	110289532	103570	0.0352	ENSBTAG00000048407	110220960	110239522	protein_coding
8	block_416_chr_8	rs110707227	rs110431913	111318888	111343181	24293	0.03489	ENSBTAG00000051710	111317608	111320675	lncRNA
9	block_53_chr_9	rs42754745	rs41657156	15495802	15528008	32206	0.03421	ENSBTAG00000016751	15461668	15554235	MYO6	protein_coding
9	block_89_chr_9	rs41656012	rs41656013	25136567	25180044	43477	0.03745	ENSBTAG00000044579	25151060	25151120	bta-mir-2284o	miRNA
9	block_92_chr_9	rs41592650	rs109582330	25904127	25970378	66251	0.03579	ENSBTAG00000003340	25960234	25979946	HDDC2	protein_coding
9	block_141_chr_9	rs110728437	rs29021351	38324504	38347892	23388	0.03641	ENSBTAG00000008817	38176518	38331079	LAMA4	protein_coding
9	block_141_chr_9	rs110728437	rs29021351	38324504	38347892	23388	0.03641	ENSBTAG00000013837	38345563	38366634	TUBE1	protein_coding
9	block_141_chr_9	rs110728437	rs29021351	38324504	38347892	23388	0.03641	ENSBTAG00000033429	38336067	38340911	FAM229B	protein_coding
9	block_143_chr_9	rs110792419	rs109562368	38688003	38708085	20082	0.04517	ENSBTAG00000011851	38628871	38780948	FYN	protein_coding
9	block_144_chr_9	rs109098141	rs41657531	39300271	39336969	36698	0.03935	ENSBTAG00000016584	39325007	39373157	RPF2	protein_coding
9	block_144_chr_9	rs109098141	rs41657531	39300271	39336969	36698	0.03935	ENSBTAG00000048787	39317989	39318095	U6	snRNA
9	block_182_chr_9	rs29017433	rs41611327	52465284	52527502	62218	0.03603	ENSBTAG00000000629	52495548	52617857	MMS22L	protein_coding
9	block_188_chr_9	rs41575824	rs42411844	53639845	53659493	19648	0.08087	ENSBTAG00000007989	53645198	53646339	FUT9	protein_coding
9	block_210_chr_9	rs43602597	rs109063163	58703658	58751696	48038	0.03448	ENSBTAG00000049952	58569557	58741713	lncRNA
9	block_224_chr_9	rs110946081	rs109358021	62571414	62596000	24586	0.04215	ENSBTAG00000021663	62573175	62585417	SMIM8	protein_coding
9	block_238_chr_9	rs43706673	rs109217503	65428890	65449563	20673	0.04417	ENSBTAG00000013591	65426509	65543729	CYB5R4	protein_coding
9	block_244_chr_9	rs41623532	rs41662459	69236440	69270585	34145	0.04132	ENSBTAG00000000240	69203273	69325807	AKAP7	protein_coding
9	block_360_chr_9	rs109910772	rs110704439	101846818	101875064	28246	0.03812	ENSBTAG00000054087	101855408	101856823	protein_coding
10	block_35_chr_10	rs43613883	rs109577222	11164763	11187112	22349	0.03573	ENSBTAG00000001619	11111559	11216841	SERINC5	protein_coding
10	block_44_chr_10	rs43617854	rs109308416	12438859	12465372	26513	0.05018	ENSBTAG00000015155	12436032	12464228	HACD3	protein_coding
10	block_44_chr_10	rs43617854	rs109308416	12438859	12465372	26513	0.05018	ENSBTAG00000042761	12458565	12458672	Y_RNA	misc_RNA
10	block_51_chr_10	rs43614200	rs43613384	13277230	13328717	51487	0.03313	ENSBTAG00000033983	13276203	13351206	MAP2K1	protein_coding
10	block_91_chr_10	rs41565990	rs29009655	19921299	19959026	37727	0.03533	ENSBTAG00000004990	19888399	20126828	NEO1	protein_coding
10	block_106_chr_10	rs110540985	rs109791037	26494631	26521248	26617	0.0331	ENSBTAG00000046058	26511346	26511942	RNASE11	protein_coding
10	block_106_chr_10	rs110540985	rs109791037	26494631	26521248	26617	0.0331	ENSBTAG00000051780	26501967	26506356	RNASE12	protein_coding
10	block_148_chr_10	rs29018232	rs110101319	38780016	38861771	81755	0.03708	ENSBTAG00000004692	38833674	38834018	processed_pseudogene
10	block_179_chr_10	rs42838037	rs110529752	46637787	46672954	35167	0.03951	ENSBTAG00000010641	46654444	46772271	APH1B	protein_coding
10	block_179_chr_10	rs42838037	rs110529752	46637787	46672954	35167	0.03951	ENSBTAG00000019390	46649404	46851817	CA12	protein_coding
10	block_255_chr_10	rs42225528	rs41666415	67930959	67967911	36952	0.04277	ENSBTAG00000047067	67953648	67953754	5S_rRNA	rRNA
10	block_264_chr_10	rs110268024	rs41624664	69208468	69259877	51409	0.04117	ENSBTAG00000014741	69215730	69224687	OTX2	protein_coding
10	block_321_chr_10	rs109999695	rs41654582	85134505	85156748	22243	0.04836	ENSBTAG00000009272	85127443	85158072	MIDEAS	protein_coding
10	block_324_chr_10	rs42810998	rs110842319	85685359	85759990	74631	0.03818	ENSBTAG00000052950	85710786	85768852	SYNDIG1L	protein_coding
10	block_348_chr_10	rs109750969	rs29025403	90001877	90036872	34995	0.03879	ENSBTAG00000050101	89777321	90172341	NRXN3	protein_coding
10	block_392_chr_10	rs110572986	rs109837613	99680118	99710643	30525	0.071	ENSBTAG00000001124	99667901	99724558	GALC	protein_coding
11	block_50_chr_11	rs109115527	rs109188527	9537410	9566673	29263	0.0408	ENSBTAG00000015575	9482775	9669064	TACR1	protein_coding
11	block_70_chr_11	rs110341524	rs109073558	13441766	13510010	68244	0.07998	ENSBTAG00000010605	13482524	13508824	VAX2	protein_coding
11	block_70_chr_11	rs110341524	rs109073558	13441766	13510010	68244	0.07998	ENSBTAG00000010620	13454348	13480401	ATP6V1B1	protein_coding
11	block_70_chr_11	rs110341524	rs109073558	13441766	13510010	68244	0.07998	ENSBTAG00000010623	13434822	13442574	ANKRD53	protein_coding
11	block_70_chr_11	rs110341524	rs109073558	13441766	13510010	68244	0.07998	ENSBTAG00000051968	13509110	13509305	misc_RNA
11	block_77_chr_11	rs110275298	rs43665542	15838674	15858872	20198	0.03956	ENSBTAG00000019839	15473232	15930122	LTBP1	protein_coding
11	block_112_chr_11	rs109290232	rs43671617	23927783	24066981	139198	0.03537	ENSBTAG00000052119	23791987	24159530	lncRNA
11	block_132_chr_11	rs43671448	rs43677722	28492327	28518141	25814	0.04445	ENSBTAG00000020614	28303215	28635155	PRKCE	protein_coding
11	block_134_chr_11	rs108982955	rs43673200	28896192	28964630	68438	0.0395	ENSBTAG00000004105	28928747	28933551	TMEM247	protein_coding
11	block_143_chr_11	rs43691132	rs41595365	30804812	30869368	64556	0.03266	ENSBTAG00000002570	30751958	30824312	PPP1R21	protein_coding
11	block_143_chr_11	rs43691132	rs41595365	30804812	30869368	64556	0.03266	ENSBTAG00000004168	30836473	30892686	STON1	protein_coding
11	block_204_chr_11	rs29020516	rs110397745	50142429	50202868	60439	0.04626	ENSBTAG00000052823	50126392	50191346	lncRNA
11	block_214_chr_11	rs41620193	rs41663399	55343739	55369267	25528	0.04786	ENSBTAG00000031669	54799681	55985486	CTNNA2	protein_coding
11	block_270_chr_11	rs41610536	rs109312001	70764561	70791523	26962	0.0351	ENSBTAG00000016934	70760932	70769467	PCARE	protein_coding
11	block_270_chr_11	rs41610536	rs109312001	70764561	70791523	26962	0.0351	ENSBTAG00000044021	70782620	70827276	TOGARAM2	protein_coding
11	block_295_chr_11	rs109759015	rs110524929	78642451	78663074	20623	0.04124	ENSBTAG00000011154	78628994	78653573	SDC1	protein_coding
11	block_317_chr_11	rs109273657	rs109231128	86890387	86989572	99185	0.03811	ENSBTAG00000001927	86882894	86942882	ATP6V1C2	protein_coding
11	block_317_chr_11	rs109273657	rs109231128	86890387	86989572	99185	0.03811	ENSBTAG00000002716	86971480	87061426	NOL10	protein_coding
11	block_383_chr_11	rs110957579	rs110109644	103406494	103426923	20429	0.03577	ENSBTAG00000006008	103394881	103437809	CAMSAP1	protein_coding
11	block_385_chr_11	rs109207430	rs109245457	103745368	103804187	58819	0.03436	ENSBTAG00000018799	103788091	103818405	GPSM1	protein_coding
11	block_385_chr_11	rs109207430	rs109245457	103745368	103804187	58819	0.03436	ENSBTAG00000023064	103748130	103771510	protein_coding
12	block_45_chr_12	rs41630762	rs41576755	13137566	13161754	24188	0.03464	ENSBTAG00000034785	13141567	13223945	DNAJC15	protein_coding
12	block_105_chr_12	rs110728973	rs110217699	34258544	34274775	16231	0.04744	ENSBTAG00000019545	34185307	34289051	protein_coding
12	block_301_chr_12	rs29012630	rs41672227	83214603	83242946	28343	0.03576	ENSBTAG00000025220	82805244	83413896	FAM155A	protein_coding
12	block_307_chr_12	rs42775315	rs42352369	84004706	84035914	31208	0.04006	ENSBTAG00000018237	83879567	84298506	MYO16	protein_coding
13	block_10_chr_13	rs42448837	rs42444116	2064084	2133989	69905	0.04046	ENSBTAG00000050292	2021029	2105092	lncRNA
13	block_196_chr_13	rs109671123	rs42615965	52247494	52276552	29058	0.04	ENSBTAG00000011425	52139610	52310545	PTPRA	protein_coding
13	block_231_chr_13	rs41703753	rs110696233	60152518	60175928	23410	0.048	ENSBTAG00000021885	60118678	60153362	RSPO4	protein_coding
13	block_289_chr_13	rs41715691	rs109321555	73757736	73784937	27201	0.03628	ENSBTAG00000016122	73747849	73759591	PIGT	protein_coding
13	block_289_chr_13	rs41715691	rs109321555	73757736	73784937	27201	0.03628	ENSBTAG00000016127	73763287	73766219	SPINT3	protein_coding
13	block_289_chr_13	rs41715691	rs109321555	73757736	73784937	27201	0.03628	ENSBTAG00000053258	73776787	73777702	pseudogene
13	block_304_chr_13	rs42799141	rs110815518	76117977	76142546	24569	0.04959	ENSBTAG00000007489	76036719	76152407	NCOA3	protein_coding
13	block_331_chr_13	rs41716175	rs109980763	79573911	79599444	25533	0.03531	ENSBTAG00000003101	79567590	79583485	SALL4	protein_coding
14	block_1_chr_14	rs109752439	rs41630614	305780	330256	24476	0.04092	ENSBTAG00000012353	309282	313478	ZNF34	protein_coding
14	block_1_chr_14	rs109752439	rs41630614	305780	330256	24476	0.04092	ENSBTAG00000026327	321231	324177	RPL8	protein_coding
14	block_77_chr_14	rs110981704	rs109929438	9063069	9098173	35104	0.04195	ENSBTAG00000007736	9074043	9111806	protein_coding
14	block_77_chr_14	rs110981704	rs109929438	9063069	9098173	35104	0.04195	ENSBTAG00000034196	9051285	9075583	HHLA1	protein_coding
14	block_105_chr_14	rs41570832	rs41614771	15454870	15481849	26979	0.0515	ENSBTAG00000020407	15383762	15553664	MTSS1	protein_coding
14	block_174_chr_14	rs41635435	rs41639945	30056908	30089537	32629	0.05343	ENSBTAG00000008629	30039506	30098890	MTFR1	protein_coding
14	block_181_chr_14	rs41737077	rs41737059	30803553	30837616	34063	0.04093	ENSBTAG00000011981	30827578	30862362	MYBL1	protein_coding
14	block_181_chr_14	rs41737077	rs41737059	30803553	30837616	34063	0.04093	ENSBTAG00000053995	30822296	30822402	U6	snRNA
14	block_199_chr_14	rs42382244	rs43089152	38274985	38304478	29493	0.07362	ENSBTAG00000004411	38295064	38345541	CRISPLD1	protein_coding
14	block_213_chr_14	rs43576496	rs41661153	41944778	41965713	20935	0.05695	ENSBTAG00000016284	41937221	41996546	IL7	protein_coding
15	block_97_chr_15	rs41625251	rs41625252	28935265	28957203	21938	0.04525	ENSBTAG00000001233	28913768	28940892	MPZL3	protein_coding
15	block_97_chr_15	rs41625251	rs41625252	28935265	28957203	21938	0.04525	ENSBTAG00000033510	28942158	29085061	MPZL2	protein_coding
15	block_192_chr_15	rs109476806	rs110276961	51981969	52018352	36383	0.03584	ENSBTAG00000001280	51880779	52022991	CLPB	protein_coding
15	block_265_chr_15	rs42364231	rs29023420	73991541	74019876	28335	0.04388	ENSBTAG00000009518	73974959	74018861	ALKBH3	protein_coding
15	block_267_chr_15	rs110384360	rs109853015	74165328	74193545	28217	0.03841	ENSBTAG00000008465	74175866	74199580	ACCS	protein_coding
15	block_267_chr_15	rs110384360	rs109853015	74165328	74193545	28217	0.03841	ENSBTAG00000012053	74160726	74173076	ACCSL	protein_coding
15	block_291_chr_15	rs109488431	rs110136873	81149022	81172004	22982	0.05365	ENSBTAG00000047396	81148671	81149618	protein_coding
15	block_294_chr_15	rs41785548	rs41785571	82642732	82674465	31733	0.04048	ENSBTAG00000027490	82654188	82655135	OR5A1	protein_coding
15	block_294_chr_15	rs41785548	rs41785571	82642732	82674465	31733	0.04048	ENSBTAG00000053849	82665715	82676524	protein_coding
16	block_74_chr_16	rs42542660	rs110103457	20367174	20404280	37106	0.03871	ENSBTAG00000050133	20388581	20399097	lncRNA
16	block_156_chr_16	rs41811813	rs109608399	41217175	41244707	27532	0.05262	ENSBTAG00000016080	41205338	41473842	VPS13D	protein_coding
16	block_231_chr_16	rs41814676	rs41814648	58081003	58102627	21624	0.04373	ENSBTAG00000012953	58058897	58410271	ASTN1	protein_coding
16	block_271_chr_16	rs109563566	rs41824236	66903914	66927091	23177	0.03414	ENSBTAG00000015235	66706032	67245075	HMCN1	protein_coding
16	block_303_chr_16	rs110177241	rs29023215	71977141	72000010	22869	0.03337	ENSBTAG00000012020	71996522	72041299	TRAF5	protein_coding
16	block_342_chr_16	rs41664179	rs41664177	77631297	77660465	29168	0.05247	ENSBTAG00000023144	77600496	77669271	PTPRC	protein_coding
16	block_342_chr_16	rs41664179	rs41664177	77631297	77660465	29168	0.05247	ENSBTAG00000046345	77633793	77634326	protein_coding
17	block_20_chr_17	rs41832749	rs41832788	4192418	4223607	31189	0.0404	ENSBTAG00000000281	4218300	4297890	MND1	protein_coding
17	block_169_chr_17	rs42763815	rs29016184	43388401	43422315	33914	0.05204	ENSBTAG00000011062	43386894	43403747	TDO2	protein_coding
17	block_231_chr_17	rs42948217	rs41843533	57652704	57676485	23781	0.05747	ENSBTAG00000044119	57231745	57664911	KSR2	protein_coding
18	block_6_chr_18	rs110151403	rs109766638	2132264	2159912	27648	0.08335	ENSBTAG00000012216	2123144	2146610	MLKL	protein_coding
18	block_6_chr_18	rs110151403	rs109766638	2132264	2159912	27648	0.08335	ENSBTAG00000012222	2151216	2205687	FA2H	protein_coding
18	block_106_chr_18	rs109980096	rs110020608	25602368	25628544	26176	0.04802	ENSBTAG00000038141	25595310	25641535	ADGRG1	protein_coding
18	block_172_chr_18	rs109074834	rs41581635	43300251	43332104	31853	0.06348	ENSBTAG00000004864	43316097	43398266	CEP89	protein_coding
18	block_174_chr_18	rs41638934	rs41881594	43496159	43521117	24958	0.03503	ENSBTAG00000000721	43488169	43545013	GPATCH1	protein_coding
18	block_232_chr_18	rs110414537	rs109685486	61946603	61977792	31189	0.0405	ENSBTAG00000012333	61915345	61960163	ZNF524	protein_coding
18	block_232_chr_18	rs110414537	rs109685486	61946603	61977792	31189	0.0405	ENSBTAG00000030403	61941890	61947502	FIZ1	protein_coding
18	block_232_chr_18	rs110414537	rs109685486	61946603	61977792	31189	0.0405	ENSBTAG00000051917	61954479	61959077	ZNF579	protein_coding
19	block_16_chr_19	rs29021008	rs41584906	7224772	7250802	26030	0.03845	ENSBTAG00000021292	7149813	7279813	ANKFN1	protein_coding
19	block_25_chr_19	rs29018185	rs41600341	10668027	10691042	23015	0.05127	ENSBTAG00000011623	10674179	10802801	VMP1	protein_coding
19	block_25_chr_19	rs29018185	rs41600341	10668027	10691042	23015	0.05127	ENSBTAG00000016710	10665274	10674104	PTRH2	protein_coding
19	block_33_chr_19	rs43706921	rs41620466	12710121	12736589	26468	0.04014	ENSBTAG00000020089	12577140	12778987	USP32	protein_coding
19	block_62_chr_19	rs41641514	rs110825575	18650667	18683330	32663	0.0343	ENSBTAG00000009353	18674661	18683264	EVI2B	protein_coding
19	block_62_chr_19	rs41641514	rs110825575	18650667	18683330	32663	0.0343	ENSBTAG00000009354	18667321	18671399	EVI2A	protein_coding
19	block_62_chr_19	rs41641514	rs110825575	18650667	18683330	32663	0.0343	ENSBTAG00000050242	18620091	18651456	protein_coding
19	block_80_chr_19	rs41905232	rs110686608	23151905	23180418	28513	0.04821	ENSBTAG00000000267	23080158	23280691	SMG6	protein_coding
19	block_122_chr_19	rs109898712	rs110302024	32911956	32932143	20187	0.03775	ENSBTAG00000031084	32923502	32946876	CDRT4	protein_coding
19	block_153_chr_19	rs110135418	rs109002403	39625810	39654574	28764	0.03408	ENSBTAG00000019347	39590711	39657423	PLXDC1	protein_coding
19	block_159_chr_19	rs43729464	rs29015754	41594056	41619572	25516	0.07	ENSBTAG00000013685	41614120	41619258	KRT31	protein_coding
19	block_159_chr_19	rs43729464	rs29015754	41594056	41619572	25516	0.07	ENSBTAG00000037560	41593205	41597632	KRT34	protein_coding
19	block_187_chr_19	rs41918348	rs41636863	49277856	49310783	32927	0.03583	ENSBTAG00000044065	49221296	49358241	protein_coding
19	block_187_chr_19	rs41918348	rs41636863	49277856	49310783	32927	0.03583	ENSBTAG00000044269	49282797	49282907	U6	snRNA
19	block_206_chr_19	rs110274761	rs42536038	52237238	52260661	23423	0.0361	ENSBTAG00000022489	52121870	52239797	protein_coding
19	block_206_chr_19	rs110274761	rs42536038	52237238	52260661	23423	0.0361	ENSBTAG00000053481	52237407	52237487	bta-mir-10164	miRNA
20	block_143_chr_20	rs42543872	rs42543895	38543545	38571692	28147	0.0897	ENSBTAG00000023529	38369475	38572090	SPEF2	protein_coding
20	block_262_chr_20	rs110298128	rs41631033	66468697	66507960	39263	0.0395	ENSBTAG00000003381	66450023	66491585	TENT4A	protein_coding
21	block_75_chr_21	rs110758267	rs108953042	19218101	19240261	22160	0.0409	ENSBTAG00000047543	18837293	19260319	NTRK3	protein_coding
21	block_81_chr_21	rs41640669	rs41582924	20568083	20594817	26734	0.04512	ENSBTAG00000019954	20576003	20684305	ABHD2	protein_coding
21	block_82_chr_21	rs110429530	rs41973071	20695391	20731657	36266	0.04354	ENSBTAG00000009097	20722980	20787646	FANCI	protein_coding
21	block_82_chr_21	rs110429530	rs41973071	20695391	20731657	36266	0.04354	ENSBTAG00000033721	20695021	20709983	RLBP1	protein_coding
21	block_85_chr_21	rs109020518	rs110678397	20987175	21017431	30256	0.04479	ENSBTAG00000002418	21011537	21053211	TICRR	protein_coding
21	block_92_chr_21	rs109797415	rs109434539	22265342	22304387	39045	0.04408	ENSBTAG00000001385	22275954	22289338	ZSCAN2	protein_coding
21	block_92_chr_21	rs109797415	rs109434539	22265342	22304387	39045	0.04408	ENSBTAG00000001387	22303092	22319532	WDR73	protein_coding
21	block_99_chr_21	rs110357607	rs41970939	24508384	24537688	29304	0.04964	ENSBTAG00000004645	24144715	24509041	ADAMTSL3	protein_coding
21	block_99_chr_21	rs110357607	rs41970939	24508384	24537688	29304	0.04964	ENSBTAG00000018004	24498758	24614322	SH3GL3	protein_coding
21	block_143_chr_21	rs29016827	rs110819139	35028158	35060758	32600	0.04366	ENSBTAG00000021291	35027776	35267297	STXBP6	protein_coding
22	block_17_chr_22	rs110939018	rs110031217	5109500	5134078	24578	0.04321	ENSBTAG00000019832	5091037	5184321	TGFBR2	protein_coding
22	block_149_chr_22	rs42231914	rs41613651	41433064	41472920	39856	0.03872	ENSBTAG00000014418	40819274	41605063	FHIT	protein_coding
22	block_166_chr_22	rs41644452	rs42013343	46740639	46762508	21869	0.07392	ENSBTAG00000013117	45924535	46818511	CACNA2D3	protein_coding
22	block_176_chr_22	rs42013153	rs41637645	48171831	48208654	36823	0.03704	ENSBTAG00000014549	48169659	48175878	GNL3	protein_coding
22	block_176_chr_22	rs42013153	rs41637645	48171831	48208654	36823	0.03704	ENSBTAG00000014786	48176132	48283003	PBRM1	protein_coding
22	block_176_chr_22	rs42013153	rs41637645	48171831	48208654	36823	0.03704	ENSBTAG00000042117	48173028	48173104	snoRNA
22	block_176_chr_22	rs42013153	rs41637645	48171831	48208654	36823	0.03704	ENSBTAG00000043914	48171770	48171845	snoRNA
22	block_176_chr_22	rs42013153	rs41637645	48171831	48208654	36823	0.03704	ENSBTAG00000044972	48172220	48172301	snoRNA
22	block_178_chr_22	rs42013317	rs110609338	48961009	48986766	25757	0.04026	ENSBTAG00000000671	48984160	48989507	PARP3	protein_coding
22	block_178_chr_22	rs42013317	rs110609338	48961009	48986766	25757	0.04026	ENSBTAG00000013442	48976816	48978925	GPR62	protein_coding
22	block_178_chr_22	rs42013317	rs110609338	48961009	48986766	25757	0.04026	ENSBTAG00000018622	48966805	48976850	PCBP4	protein_coding
22	block_178_chr_22	rs42013317	rs110609338	48961009	48986766	25757	0.04026	ENSBTAG00000037377	48962168	48965810	ABHD14B	protein_coding
22	block_199_chr_22	rs41585965	rs109776329	53319876	53356121	36245	0.03281	ENSBTAG00000015698	53336390	53403928	FYCO1	protein_coding
22	block_199_chr_22	rs41585965	rs109776329	53319876	53356121	36245	0.03281	ENSBTAG00000020019	53319181	53320182	XCR1	protein_coding
22	block_231_chr_22	rs109659822	rs110019581	58055817	58086195	30378	0.03551	ENSBTAG00000007360	58064573	58095559	TMEM43	protein_coding
22	block_231_chr_22	rs109659822	rs110019581	58055817	58086195	30378	0.03551	ENSBTAG00000007362	58040295	58063254	XPC	protein_coding
22	block_231_chr_22	rs109659822	rs110019581	58055817	58086195	30378	0.03551	ENSBTAG00000015529	58085681	58092399	CHCHD4	protein_coding
22	block_244_chr_22	rs110904383	rs109051741	60225202	60258838	33636	0.09592	ENSBTAG00000009159	60240226	60280068	PLXNA1	protein_coding
23	block_15_chr_23	rs41589772	rs109594925	4514654	4535201	20547	0.0328	ENSBTAG00000012870	4470532	4614742	BMP5	protein_coding
23	block_19_chr_23	rs110708312	rs109793138	4861885	4892090	30205	0.06328	ENSBTAG00000025718	4789382	4986934	HMGCLL1	protein_coding
23	block_59_chr_23	rs109152735	rs109130384	15338295	15367501	29206	0.09398	ENSBTAG00000014211	15366276	15417429	FOXP4	protein_coding
23	block_96_chr_23	rs41587573	rs109493269	24823737	24863032	39295	0.04103	ENSBTAG00000017810	24842515	24883070	EFHC1	protein_coding
23	block_96_chr_23	rs41587573	rs109493269	24823737	24863032	39295	0.04103	ENSBTAG00000025494	24783271	24826623	PAQR8	protein_coding
23	block_101_chr_23	rs41255514	rs17872223	27494111	27495679	1568	0.03332	ENSBTAG00000005674	27494530	27498491	NEU1	protein_coding
23	block_101_chr_23	rs41255514	rs17872223	27494111	27495679	1568	0.03332	ENSBTAG00000005675	27480743	27494225	SLC44A4	protein_coding
24	block_88_chr_24	rs110770182	rs110394077	24013956	24039121	25165	0.03518	ENSBTAG00000000138	23839854	24195827	CCDC178	protein_coding
24	block_127_chr_24	rs41574914	rs29020396	31675938	31701303	25365	0.03931	ENSBTAG00000007383	31380664	31692928	ZNF521	protein_coding
24	block_236_chr_24	rs110717504	rs110870395	60093951	60176845	82894	0.05239	ENSBTAG00000001739	59887828	60100758	CDH20	protein_coding
25	block_55_chr_25	rs42055965	rs109346628	11164460	11184503	20043	0.04911	ENSBTAG00000026371	10682180	11276292	SNX29	protein_coding
25	block_97_chr_25	rs42058295	rs110661209	21117700	21140242	22542	0.03769	ENSBTAG00000032223	21049528	21139768	COG7	protein_coding
25	block_111_chr_25	rs109270575	rs41614841	25163991	25184714	20723	0.03848	ENSBTAG00000006129	25087968	25327424	KATNIP	protein_coding
25	block_120_chr_25	rs41587290	rs43180938	28114743	28123091	8348	0.0357	ENSBTAG00000000390	28081759	28188134	TPST1	protein_coding
25	block_163_chr_25	rs109405213	rs109140856	34536825	34556876	20051	0.04637	ENSBTAG00000005448	34549739	34572255	protein_coding
26	block_16_chr_26	rs41650535	rs110308884	7443726	7467841	24115	0.03761	ENSBTAG00000018404	6899619	8313722	PRKG1	protein_coding
26	block_17_chr_26	rs42082618	rs41568479	7546365	7567042	20677	0.03685	ENSBTAG00000018404	6899619	8313722	PRKG1	protein_coding
26	block_26_chr_26	rs110924756	rs110358830	9836117	9867428	31311	0.05347	ENSBTAG00000048748	9806435	9850770	lncRNA
26	block_43_chr_26	rs110970157	rs41661672	13899525	13934098	34573	0.04089	ENSBTAG00000019759	13881642	13976189	IDE	protein_coding
26	block_47_chr_26	rs109184928	rs109653528	14684949	14710058	25109	0.05565	ENSBTAG00000016918	14623780	14803157	MYOF	protein_coding
26	block_48_chr_26	rs110553236	rs41601927	14930932	14960555	29623	0.03268	ENSBTAG00000000445	14911696	14964875	PDE6C	protein_coding
26	block_60_chr_26	rs42084620	rs41606817	17606022	17628730	22708	0.05464	ENSBTAG00000021358	17515994	17644805	BLNK	protein_coding
26	block_92_chr_26	rs41589674	rs109450381	26047186	26076346	29160	0.03604	ENSBTAG00000004612	25203123	26181296	SORCS3	protein_coding
26	block_100_chr_26	rs41604819	rs41636627	27902998	27933010	30012	0.06003	ENSBTAG00000007948	27553353	27912060	SORCS1	protein_coding
26	block_137_chr_26	rs109875268	rs110822681	37010533	37042629	32096	0.0601	ENSBTAG00000000765	37019951	37039831	PNLIPRP2	protein_coding
26	block_157_chr_26	rs110148835	rs41568468	41451309	41477794	26485	0.03777	ENSBTAG00000014064	41450745	41558092	FGFR2	protein_coding
26	block_187_chr_26	rs109450346	rs42101711	46765748	46787804	22056	0.06642	ENSBTAG00000031890	46392481	46948728	DOCK1	protein_coding
26	block_193_chr_26	rs110105463	rs111008529	48859017	48880894	21877	0.06368	ENSBTAG00000050386	48818674	49095122	MGMT	protein_coding
26	block_199_chr_26	rs109629359	rs42500277	50846722	50879471	32749	0.0514	ENSBTAG00000019919	50822833	50865778	protein_coding
26	block_203_chr_26	rs109744678	rs109354426	51713691	51748228	34537	0.04307	ENSBTAG00000000951	51737604	51822703	JAKMIP3	protein_coding
27	block_26_chr_27	rs42437286	rs42439066	8639941	8672918	32977	0.07189	ENSBTAG00000049151	8664638	8667964	lncRNA
27	block_40_chr_27	rs41607481	rs109985258	13758001	13806128	48127	0.03672	ENSBTAG00000021133	13483623	13772466	TENM3	protein_coding
27	block_90_chr_27	rs43331419	rs43331380	23526240	23560002	33762	0.04087	ENSBTAG00000015541	23395827	23916949	DLC1	protein_coding
27	block_150_chr_27	rs109654144	rs109386328	36575886	36596672	20786	0.04331	ENSBTAG00000027629	36565855	36576598	protein_coding
27	block_150_chr_27	rs109654144	rs109386328	36575886	36596672	20786	0.04331	ENSBTAG00000054394	36583409	36610753	protein_coding
27	block_157_chr_27	rs109746481	rs109807388	38303470	38327324	23854	0.04453	ENSBTAG00000001186	38246299	38307830	SH2D4A	protein_coding
27	block_157_chr_27	rs109746481	rs109807388	38303470	38327324	23854	0.04453	ENSBTAG00000036777	38318224	38318340	5S_rRNA	rRNA
28	block_14_chr_28	rs42133604	rs110256015	3893802	3921646	27844	0.03749	ENSBTAG00000047877	3904873	3963570	TRIM67	protein_coding
28	block_63_chr_28	rs41651370	rs42134489	15383786	15472249	88463	0.04973	ENSBTAG00000003189	15463074	15571693	CCDC6	protein_coding
28	block_63_chr_28	rs41651370	rs42134489	15383786	15472249	88463	0.04973	ENSBTAG00000019792	15308624	15393525	SLC16A9	protein_coding
28	block_63_chr_28	rs41651370	rs42134489	15383786	15472249	88463	0.04973	ENSBTAG00000044888	15386293	15386367	bta-mir-2403	miRNA
28	block_63_chr_28	rs41651370	rs42134489	15383786	15472249	88463	0.04973	ENSBTAG00000050076	15415504	15432426	MRLN	protein_coding
28	block_63_chr_28	rs41651370	rs42134489	15383786	15472249	88463	0.04973	ENSBTAG00000054999	15386724	15387932	protein_coding
28	block_68_chr_28	rs110036421	rs42137930	15913942	15942493	28551	0.04097	ENSBTAG00000050189	15866749	15951588	protein_coding
28	block_71_chr_28	rs110256597	rs29016861	16485524	16509045	23521	0.03833	ENSBTAG00000010109	16488142	16582565	CDK1	protein_coding
28	block_98_chr_28	rs41606880	rs110462383	24274916	24372375	97459	0.05646	ENSBTAG00000010932	24248418	24296594	DNAJC12	protein_coding
28	block_98_chr_28	rs41606880	rs110462383	24274916	24372375	97459	0.05646	ENSBTAG00000051268	24329477	24332103	protein_coding
28	block_127_chr_28	rs110003368	rs109412394	28700411	28725060	24649	0.03821	ENSBTAG00000003876	28709027	28902834	MCU	protein_coding
28	block_136_chr_28	rs110665327	rs110789957	33039670	33061971	22301	0.04009	ENSBTAG00000013300	32616314	33387186	KCNMA1	protein_coding
28	block_147_chr_28	rs29013660	rs41646367	35132199	35155098	22899	0.03476	ENSBTAG00000020940	35119177	35161497	ANXA11	protein_coding
28	block_156_chr_28	rs42150562	rs41646393	37128017	37155974	27957	0.0549	ENSBTAG00000009587	36896430	38132186	NRG3	protein_coding
28	block_162_chr_28	rs109982860	rs41615110	37709725	37747210	37485	0.07595	ENSBTAG00000009587	36896430	38132186	NRG3	protein_coding
28	block_172_chr_28	rs379579042	rs109509266	40588002	40601070	13068	0.03372	ENSBTAG00000019623	40404330	41087444	GRID1	protein_coding
28	block_181_chr_28	rs42151171	rs29024828	41716255	41752572	36317	0.04258	ENSBTAG00000019194	41650333	41763371	SHLD2	protein_coding
28	block_193_chr_28	rs109619301	rs42152188	43811994	43842240	30246	0.03577	ENSBTAG00000021728	43841934	43868982	OGDHL	protein_coding
28	block_193_chr_28	rs109619301	rs42152188	43811994	43842240	30246	0.03577	ENSBTAG00000045949	43813283	43822888	C28H10orf53	protein_coding
29	block_8_chr_29	rs109387887	rs110886484	2553781	2577613	23832	0.04249	ENSBTAG00000004081	1996704	2635494	FAT3	protein_coding
29	block_8_chr_29	rs109387887	rs110886484	2553781	2577613	23832	0.04249	ENSBTAG00000042920	2559351	2559459	U6	snRNA
29	block_71_chr_29	rs41649522	rs41589207	23394771	23415986	21215	0.03388	ENSBTAG00000050228	23256230	23784284	protein_coding
29	block_75_chr_29	rs41575769	rs29021971	24098223	24117260	19037	0.09894	ENSBTAG00000048576	24002708	24295209	protein_coding
29	block_92_chr_29	rs109427317	rs29026721	28154066	28190477	36411	0.04989	ENSBTAG00000009412	28116611	28154372	SIAE	protein_coding
29	block_92_chr_29	rs109427317	rs29026721	28154066	28190477	36411	0.04989	ENSBTAG00000033464	28154527	28168618	SPA17	protein_coding
29	block_163_chr_29	rs110311277	rs108940218	41725399	41749646	24247	0.04739	ENSBTAG00000003236	41708650	41738156	protein_coding
29	block_169_chr_29	rs110726142	rs109814977	42876534	42905396	28862	0.03502	ENSBTAG00000000244	42855130	42966249	NRXN2	protein_coding
29	block_196_chr_29	rs43707003	rs43707005	48070831	48098153	27322	0.03351	ENSBTAG00000003171	47561091	48119060	SHANK2	protein_coding
29	block_202_chr_29	rs109595049	rs109039119	49563285	49601476	38191	0.03707	ENSBTAG00000010447	49598330	49637383	LSP1	protein_coding
29	block_202_chr_29	rs109595049	rs109039119	49563285	49601476	38191	0.03707	ENSBTAG00000022158	49579179	49594887	TNNT3	protein_coding
29	block_202_chr_29	rs109595049	rs109039119	49563285	49601476	38191	0.03707	ENSBTAG00000048504	49596205	49601869	protein_coding
30	block_8_chr_30	rs42202984	rs42204099	136572031	136601015	28984	0.04972	ENSBTAG00000027841	136346606	136694634	protein_coding
30	block_14_chr_30	rs109460397	rs29016272	138539853	138566171	26318	0.0357	ENSBTAG00000022150	138519497	138540790	MXRA5	protein_coding
QTL overlapped with the top 0.001% markers in percentage of variance explained
Chromosome	Marker	Start_SNP (marker)	END_SNP (marker)	Start_Position (marker)	End_Position (marker)	Size_in_kb(marker)	%Variance_explained	QTL_Type	Start_Position (QTL)	End_Position (QTL)	QTL_ID	Trait_associated	Trait_Abreviation	Breeds_found	Tag_SNP
1	block_14_chr_1	rs110593395	rs29024375	4250046	4309205	59159	0.05089	Production	4250044	4250048	QTL_ID=66725	trait=Body_weight_(yearling)	Abbrev=W365	breed=Hanwoo	rs378493804
1	block_14_chr_1	rs110593395	rs29024375	4250046	4309205	59159	0.05089	Production	4276063	4276067	QTL_ID=66789	trait=Body_weight_(yearling)	Abbrev=W365	breed=charolais	rs43212771
1	block_14_chr_1	rs110593395	rs29024375	4250046	4309205	59159	0.05089	Reproduction	4253948	4253952	QTL_ID=176659	trait=First_service_conception	Abbrev=FSC	breed=holstein	rs132784449
1	block_14_chr_1	rs110593395	rs29024375	4250046	4309205	59159	0.05089	Reproduction	4253948	4253952	QTL_ID=176888	trait=First_service_conception	Abbrev=FSC	breed=holstein	rs43211381,rs41633082
1	block_14_chr_1	rs110593395	rs29024375	4250046	4309205	59159	0.05089	Reproduction	4253948	4253952	QTL_ID=212069	trait=First_service_conception	Abbrev=FSC	breed=blonde_d'aquitaine	rs43765148,rs109811373,rs43210941
1	block_14_chr_1	rs110593395	rs29024375	4250046	4309205	59159	0.05089	Reproduction	4253948	4253952	QTL_ID=212416	trait=Inseminations_per_conception	Abbrev=CONCEPT	breed=holstein	rs41614480
1	block_17_chr_1	rs41628897	rs43209887	4729973	4804971	74998	0.03538	Health	4737483	4737487	QTL_ID=178917	trait=Bovine_tuberculosis_susceptibility	Abbrev=BTBS	breed=holstein	rs43204112
1	block_32_chr_1	rs41255421	rs41584442	9592005	9646618	54613	0.03481	Production	9625270	9625274	QTL_ID=164665	trait=Body_weight_(yearling)	Abbrev=W365	breed=holstein	rs136767715
1	block_32_chr_1	rs41255421	rs41584442	9592005	9646618	54613	0.03481	Reproduction	9592003	9592007	QTL_ID=56268	trait=Sperm_motility	Abbrev=SPMOT	breed=holstein	rs135056593
1	block_224_chr_1	rs41255415	rs108992751	66150690	66188904	38214	0.04046	Reproduction	66188902	66188906	QTL_ID=173355	trait=Daughter_pregnancy_rate	Abbrev=DPR	breed=holstein	rs43243872
1	block_230_chr_1	rs29018937	rs41602465	67284880	67309126	24246	0.03578	Milk	67298497	67298501	QTL_ID=63564	trait=Milk_C18_index	Abbrev=MC18	breed=holstein	rs42845689
1	block_231_chr_1	rs109765671	rs41630801	67369224	67423265	54041	0.03458	Milk	67371789	67371793	QTL_ID=63593	trait=Milk_C18_index	Abbrev=MC18	breed=holstein	rs41628909
1	block_231_chr_1	rs109765671	rs41630801	67369224	67423265	54041	0.03458	Milk	67409043	67409047	QTL_ID=63639	trait=Milk_C18_index	Abbrev=MC18	breed=holstein	rs41628909
1	block_311_chr_1	rs42455329	rs41613169	91673661	91758979	85318	0.05254	Health	91727149	91727153	QTL_ID=95654	trait=Bovine_respiratory_disease_susceptibility	Abbrev=BRDS	breed=holstein	rs29023726
1	block_311_chr_1	rs42455329	rs41613169	91673661	91758979	85318	0.05254	Production	91706586	91706590	QTL_ID=66781	trait=Body_weight_(yearling)	Abbrev=W365	breed=holstein	rs41638858
1	block_311_chr_1	rs42455329	rs41613169	91673661	91758979	85318	0.05254	Production	91706586	91706590	QTL_ID=66782	trait=Body_weight_gain	Abbrev=BWG	breed=holstein	rs29015093
1	block_392_chr_1	rs41632723	rs41751194	111566373	111654919	88546	0.07455	Milk	111577411	111577415	QTL_ID=155361	trait=Milk_caproic_acid_content	Abbrev=MFA-C6:0	breed=Valdostana_Red_Pied	rs42746298
1	block_392_chr_1	rs41632723	rs41751194	111566373	111654919	88546	0.07455	Milk	111577411	111577415	QTL_ID=155514	trait=Milk_caprylic_acid_content	Abbrev=MFA-C8:0	breed=holstein	rs42746298
1	block_392_chr_1	rs41632723	rs41751194	111566373	111654919	88546	0.07455	Production	111654917	111654921	QTL_ID=20986	trait=Average_daily_feed_intake	Abbrev=ADFI	breed=holstein	rs43236849
1	block_408_chr_1	rs109483880	rs29019947	116654067	116725563	71496	0.07161	Reproduction	116678367	116678371	QTL_ID=212443	trait=Inseminations_per_conception	Abbrev=CONCEPT	breed=holstein	rs137041533
1	block_418_chr_1	rs43265648	rs41635984	118603687	118638525	34838	0.04564	Health	118638523	118638527	QTL_ID=16300	trait=Johne's_disease_tolerance	Abbrev=JDTOL	breed=holstein	rs41639303
1	block_418_chr_1	rs43265648	rs41635984	118603687	118638525	34838	0.04564	Production	118603685	118603689	QTL_ID=66806	trait=Body_weight_(yearling)	Abbrev=W365	breed=holstein	rs41639303
1	block_418_chr_1	rs43265648	rs41635984	118603687	118638525	34838	0.04564	Production	118603685	118603689	QTL_ID=66807	trait=Body_weight_(yearling)	Abbrev=W365	breed=holstein	rs41639303
1	block_418_chr_1	rs43265648	rs41635984	118603687	118638525	34838	0.04564	Production	118603685	118603689	QTL_ID=66808	trait=Body_weight_gain	Abbrev=BWG	breed=holstein	rs41639303
1	block_418_chr_1	rs43265648	rs41635984	118603687	118638525	34838	0.04564	Production	118603685	118603689	QTL_ID=66809	trait=Body_weight_gain	Abbrev=BWG	breed=holstein	rs41639303
1	block_418_chr_1	rs43265648	rs41635984	118603687	118638525	34838	0.04564	Production	118638523	118638527	QTL_ID=66303	trait=Body_weight_(yearling)	Abbrev=W365	breed=holstein	rs133142877
1	block_418_chr_1	rs43265648	rs41635984	118603687	118638525	34838	0.04564	Production	118638523	118638527	QTL_ID=66757	trait=Body_weight_(yearling)	Abbrev=W365	breed=holstein	rs41639303
1	block_418_chr_1	rs43265648	rs41635984	118603687	118638525	34838	0.04564	Production	118638523	118638527	QTL_ID=66758	trait=Body_weight_gain	Abbrev=BWG	breed=holstein	rs110172425
1	block_418_chr_1	rs43265648	rs41635984	118603687	118638525	34838	0.04564	Production	118638523	118638527	QTL_ID=66759	trait=Body_weight_gain	Abbrev=BWG	breed=holstein	rs43271516
1	block_418_chr_1	rs43265648	rs41635984	118603687	118638525	34838	0.04564	Production	118638523	118638527	QTL_ID=66760	trait=Body_weight_gain	Abbrev=BWG	breed=holstein	rs110971315
1	block_419_chr_1	rs110020644	rs110308751	118785100	118808555	23455	0.03574	Milk	118808553	118808557	QTL_ID=25388	trait=Milk_yield	Abbrev=MY	breed=holstein	rs41639303
1	block_419_chr_1	rs110020644	rs110308751	118785100	118808555	23455	0.03574	Production	118785098	118785102	QTL_ID=66716	trait=Body_weight_(yearling)	Abbrev=W365	breed=charolais,gelbvieh,hereford,limousin,pinzgauer,red_angus,red_poll,simmental,Angus	rs43271449
1	block_419_chr_1	rs110020644	rs110308751	118785100	118808555	23455	0.03574	Production	118808553	118808557	QTL_ID=66722	trait=Body_weight_(yearling)	Abbrev=W365	breed=norwegian_red	rs41639338
1	block_548_chr_1	rs109117962	rs109183393	151120755	151140218	19463	0.0358	Milk	151120753	151120757	QTL_ID=25392	trait=Milk_yield	Abbrev=MY	breed=holstein	rs41641857
1	block_548_chr_1	rs109117962	rs109183393	151120755	151140218	19463	0.0358	Milk	151120753	151120757	QTL_ID=26723	trait=Milk_protein_percentage	Abbrev=PP	breed=holstein	rs137445560
1	block_577_chr_1	rs109668017	rs41617748	156644833	156682865	38032	0.06578	Milk	156682863	156682867	QTL_ID=25762	trait=Milk_fat_yield	Abbrev=FY	breed=jersey	rs43276300
2	block_11_chr_2	rs41591798	rs109431065	1936492	1996646	60154	0.03509	Exterior	1966581	1966585	QTL_ID=28151	trait=Foot_angle	Abbrev=FANG	breed=limousin	rs29010906,rs41638273,rs41626743
2	block_87_chr_2	rs110203175	rs110892921	21370144	21391926	21782	0.03615	Production	21391924	21391928	QTL_ID=23640	trait=Average_daily_gain	Abbrev=ADG	breed=holstein	rs110783123
2	block_87_chr_2	rs110203175	rs110892921	21370144	21391926	21782	0.03615	Production	21391924	21391928	QTL_ID=66862	trait=Body_weight_(yearling)	Abbrev=W365	breed=holstein	rs42209697
2	block_226_chr_2	rs43307468	rs108966253	57537885	57602594	64709	0.03261	Milk	57570002	57570006	QTL_ID=157343	trait=Milking_speed	Abbrev=MSPD	breed=holstein	rs43316036
2	block_226_chr_2	rs43307468	rs108966253	57537885	57602594	64709	0.03261	Production	57602592	57602596	QTL_ID=23642	trait=Metabolic_body_weight	Abbrev=MBW	breed=holstein	rs43314516
2	block_275_chr_2	rs41567710	rs42977041	69519578	69575725	56147	0.03658	Production	69554111	69554115	QTL_ID=157020	trait=Body_weight_(yearling)	Abbrev=W365	breed=holstein	rs43702461
2	block_360_chr_2	rs41644177	rs110594836	105556193	105589302	33109	0.04273	Reproduction	105556191	105556195	QTL_ID=30597	trait=Inhibin_level	Abbrev=INHIB	breed=holstein	rs29027359
2	block_410_chr_2	rs110177119	rs41598273	116395928	116423023	27095	0.06815	Milk	116423021	116423025	QTL_ID=69756	trait=Milk_zinc_content	Abbrev=MZN	breed=holstein	rs109395536
2	block_451_chr_2	rs109309637	rs109780234	127218611	127238953	20342	0.03808	Milk	127231883	127231887	QTL_ID=111308	trait=Milk_kappa-casein_percentage	Abbrev=MKCASP	breed=	rs43210602
3	block_5_chr_3	rs109120506	rs109791607	1196759	1219749	22990	0.03522	Production	1200366	1200370	QTL_ID=123342	trait=Length_of_productive_life	Abbrev=PL	breed=charolais,gelbvieh,hereford,limousin,pinzgauer,red_angus,red_poll,simmental,Angus	rs135107424
3	block_69_chr_3	rs41658158	rs109099725	26066448	26126232	59784	0.03447	Health	26099665	26099669	QTL_ID=106145	trait=Bovine_leukemia_virus_susceptibility	Abbrev=BLVS	breed=holstein	rs110005550
3	block_108_chr_3	rs109542056	rs29012800	35139604	35171112	31508	0.06322	Exterior	35139602	35139606	QTL_ID=28109	trait=Dairy_form	Abbrev=DYF	breed=holstein	rs43101620,rs110769771
3	block_108_chr_3	rs109542056	rs29012800	35139604	35171112	31508	0.06322	Exterior	35139602	35139606	QTL_ID=28112	trait=Angularity	Abbrev=ANG	breed=holstein	rs109050772,rs42634055
3	block_134_chr_3	rs41590454	rs29025951	44803996	44825241	21245	0.03956	Exterior	44803994	44803998	QTL_ID=31044	trait=Angularity	Abbrev=ANG	breed=Angus	rs43350087
3	block_134_chr_3	rs41590454	rs29025951	44803996	44825241	21245	0.03956	Milk	44803994	44803998	QTL_ID=25789	trait=Milk_fat_yield	Abbrev=FY	breed=holstein	rs109533386
3	block_134_chr_3	rs41590454	rs29025951	44803996	44825241	21245	0.03956	Milk	44825239	44825243	QTL_ID=14918	trait=Milk_protein_yield	Abbrev=PY	breed=brown_swiss	rs109915247
3	block_134_chr_3	rs41590454	rs29025951	44803996	44825241	21245	0.03956	Milk	44825239	44825243	QTL_ID=175332	trait=Milk_protein_yield	Abbrev=PY	breed=holstein	rs109907543
3	block_136_chr_3	rs43117607	rs42586854	46613397	46680174	66777	0.03741	Milk	46640789	46640793	QTL_ID=39779	trait=Milk_fat_yield	Abbrev=FY	breed=holstein	rs109790086
3	block_136_chr_3	rs43117607	rs42586854	46613397	46680174	66777	0.03741	Milk	46640789	46640793	QTL_ID=39780	trait=Milk_yield	Abbrev=MY	breed=holstein	rs109790086
3	block_136_chr_3	rs43117607	rs42586854	46613397	46680174	66777	0.03741	Milk	46640789	46640793	QTL_ID=39782	trait=Milk_protein_yield	Abbrev=PY	breed=holstein	rs109790086
3	block_136_chr_3	rs43117607	rs42586854	46613397	46680174	66777	0.03741	Milk	46680172	46680176	QTL_ID=39784	trait=Milk_fat_yield	Abbrev=FY	breed=holstein	rs109790086
3	block_136_chr_3	rs43117607	rs42586854	46613397	46680174	66777	0.03741	Milk	46680172	46680176	QTL_ID=39785	trait=Milk_yield	Abbrev=MY	breed=holstein	rs109790086
3	block_136_chr_3	rs43117607	rs42586854	46613397	46680174	66777	0.03741	Milk	46680172	46680176	QTL_ID=39787	trait=Milk_protein_yield	Abbrev=PY	breed=holstein	rs109790086
3	block_136_chr_3	rs43117607	rs42586854	46613397	46680174	66777	0.03741	Production	46640789	46640793	QTL_ID=39781	trait=Net_merit	Abbrev=NM	breed=holstein	rs109790086
3	block_136_chr_3	rs43117607	rs42586854	46613397	46680174	66777	0.03741	Production	46680172	46680176	QTL_ID=39786	trait=Net_merit	Abbrev=NM	breed=holstein	rs109790086
3	block_136_chr_3	rs43117607	rs42586854	46613397	46680174	66777	0.03741	Reproduction	46640789	46640793	QTL_ID=39783	trait=Calving_ease	Abbrev=CALEASE	breed=holstein	rs109790086
3	block_136_chr_3	rs43117607	rs42586854	46613397	46680174	66777	0.03741	Reproduction	46680172	46680176	QTL_ID=39788	trait=Calving_ease	Abbrev=CALEASE	breed=holstein	rs109790086
3	block_137_chr_3	rs41624161	rs42967999	46986210	47013530	27320	0.10199	Exterior	47013528	47013532	QTL_ID=39799	trait=Rump_angle	Abbrev=RANG	breed=holstein	rs109460728
3	block_137_chr_3	rs41624161	rs42967999	46986210	47013530	27320	0.10199	Milk	47013528	47013532	QTL_ID=39795	trait=Milk_fat_yield	Abbrev=FY	breed=holstein	rs109460728
3	block_137_chr_3	rs41624161	rs42967999	46986210	47013530	27320	0.10199	Milk	47013528	47013532	QTL_ID=39796	trait=Milk_yield	Abbrev=MY	breed=holstein	rs109460728
3	block_137_chr_3	rs41624161	rs42967999	46986210	47013530	27320	0.10199	Milk	47013528	47013532	QTL_ID=39798	trait=Milk_protein_yield	Abbrev=PY	breed=holstein	rs109460728
3	block_137_chr_3	rs41624161	rs42967999	46986210	47013530	27320	0.10199	Milk	.	.	QTL_ID=105587	trait=Milk_protein_percentage	Abbrev=PP	breed=charolais,chianina,gelbvieh,hereford,holstein,limousin,piedmontese,red_angus,simmental,Angus,Maine-Anjou	rs42967999
3	block_137_chr_3	rs41624161	rs42967999	46986210	47013530	27320	0.10199	Production	47013528	47013532	QTL_ID=39797	trait=Net_merit	Abbrev=NM	breed=holstein	rs109460728
3	block_137_chr_3	rs41624161	rs42967999	46986210	47013530	27320	0.10199	Production	.	.	QTL_ID=5321	trait=Residual_feed_intake	Abbrev=RFI	breed=holstein	rs42967999
3	block_137_chr_3	rs41624161	rs42967999	46986210	47013530	27320	0.10199	Reproduction	47013528	47013532	QTL_ID=39794	trait=Calving_ease_(maternal)	Abbrev=CALEASE	breed=holstein	rs109460728
3	block_137_chr_3	rs41624161	rs42967999	46986210	47013530	27320	0.10199	Reproduction	47013528	47013532	QTL_ID=39800	trait=Calving_ease	Abbrev=CALEASE	breed=holstein	rs109460728
3	block_144_chr_3	rs43339412	rs110384429	48234094	48285929	51835	0.07392	Production	48234092	48234096	QTL_ID=164356	trait=Body_weight_(birth)	Abbrev=BW	breed=holstein	rs41596889
3	block_193_chr_3	rs42867941	rs43702513	64174324	64239387	65063	0.04818	Milk	.	.	QTL_ID=2443	trait=Milk_protein_percentage	Abbrev=PP	breed=nelore	rs43702513
3	block_193_chr_3	rs42867941	rs43702513	64174324	64239387	65063	0.04818	Production	64239385	64239389	QTL_ID=66997	trait=Body_weight_gain	Abbrev=BWG	breed=holstein	rs42862819
3	block_287_chr_3	rs109973160	rs41615093	86426227	86584978	158751	0.03298	Milk	86513264	86513268	QTL_ID=118550	trait=Milk_unglycosylated_kappa-casein_percentage	Abbrev=MUGKCASP	breed=holstein	rs384883386
3	block_287_chr_3	rs109973160	rs41615093	86426227	86584978	158751	0.03298	Milk	86519379	86519383	QTL_ID=118551	trait=Milk_unglycosylated_kappa-casein_percentage	Abbrev=MUGKCASP	breed=holstein	rs384915807
3	block_287_chr_3	rs109973160	rs41615093	86426227	86584978	158751	0.03298	Milk	86521918	86521922	QTL_ID=118552	trait=Milk_unglycosylated_kappa-casein_percentage	Abbrev=MUGKCASP	breed=holstein	rs384915807
3	block_287_chr_3	rs109973160	rs41615093	86426227	86584978	158751	0.03298	Milk	86521918	86521922	QTL_ID=14889	trait=Milk_yield	Abbrev=MY	breed=hereford,Angus	rs133218979
3	block_287_chr_3	rs109973160	rs41615093	86426227	86584978	158751	0.03298	Milk	86521918	86521922	QTL_ID=14920	trait=Milk_protein_yield	Abbrev=PY	breed=holstein	rs42508711
3	block_287_chr_3	rs109973160	rs41615093	86426227	86584978	158751	0.03298	Milk	86536943	86536947	QTL_ID=118553	trait=Milk_unglycosylated_kappa-casein_percentage	Abbrev=MUGKCASP	breed=holstein	rs384915807
3	block_320_chr_3	rs43350848	rs109726753	92054056	92123920	69864	0.05919	Reproduction	92058004	92058008	QTL_ID=121566	trait=Luteal_activity	Abbrev=LUTACT	breed=holstein	rs137353877
3	block_320_chr_3	rs43350848	rs109726753	92054056	92123920	69864	0.05919	Reproduction	92060611	92060615	QTL_ID=121458	trait=Luteal_activity	Abbrev=LUTACT	breed=Angus	rs439093722
3	block_320_chr_3	rs43350848	rs109726753	92054056	92123920	69864	0.05919	Reproduction	92064952	92064956	QTL_ID=121575	trait=Luteal_activity	Abbrev=LUTACT	breed=holstein	rs41587368
3	block_320_chr_3	rs43350848	rs109726753	92054056	92123920	69864	0.05919	Reproduction	92066101	92066105	QTL_ID=121506	trait=Luteal_activity	Abbrev=LUTACT	breed=holstein	rs465686780
3	block_320_chr_3	rs43350848	rs109726753	92054056	92123920	69864	0.05919	Reproduction	92066715	92066719	QTL_ID=121007	trait=Luteal_activity	Abbrev=LUTACT	breed=holstein	rs136396728
3	block_320_chr_3	rs43350848	rs109726753	92054056	92123920	69864	0.05919	Reproduction	92066883	92066887	QTL_ID=120927	trait=Luteal_activity	Abbrev=LUTACT	breed=holstein	rs109530280
3	block_320_chr_3	rs43350848	rs109726753	92054056	92123920	69864	0.05919	Reproduction	92070056	92070060	QTL_ID=120972	trait=Luteal_activity	Abbrev=LUTACT	breed=holstein	rs43367040
3	block_320_chr_3	rs43350848	rs109726753	92054056	92123920	69864	0.05919	Reproduction	92070696	92070700	QTL_ID=121155	trait=Luteal_activity	Abbrev=LUTACT	breed=holstein	rs136798183
3	block_320_chr_3	rs43350848	rs109726753	92054056	92123920	69864	0.05919	Reproduction	92070701	92070705	QTL_ID=120903	trait=Luteal_activity	Abbrev=LUTACT	breed=holstein	rs134311964
3	block_320_chr_3	rs43350848	rs109726753	92054056	92123920	69864	0.05919	Reproduction	92082465	92082469	QTL_ID=120932	trait=Luteal_activity	Abbrev=LUTACT	breed=holstein	rs133200096
3	block_320_chr_3	rs43350848	rs109726753	92054056	92123920	69864	0.05919	Reproduction	92082795	92082799	QTL_ID=121201	trait=Luteal_activity	Abbrev=LUTACT	breed=holstein	rs480285530
3	block_320_chr_3	rs43350848	rs109726753	92054056	92123920	69864	0.05919	Reproduction	92085385	92085389	QTL_ID=121535	trait=Luteal_activity	Abbrev=LUTACT	breed=holstein	rs110228865
3	block_320_chr_3	rs43350848	rs109726753	92054056	92123920	69864	0.05919	Reproduction	92092067	92092071	QTL_ID=106921	trait=Daughter_pregnancy_rate	Abbrev=DPR	breed=holstein	rs109977837
3	block_320_chr_3	rs43350848	rs109726753	92054056	92123920	69864	0.05919	Reproduction	92102204	92102208	QTL_ID=121021	trait=Luteal_activity	Abbrev=LUTACT	breed=holstein	rs109977837
3	block_420_chr_3	rs110656886	rs42460993	113880893	113901073	20180	0.07112	Milk	113884234	113884238	QTL_ID=64006	trait=Milk_riboflavin_content	Abbrev=RIBO	breed=holstein	rs41649818,rs29011657
3	block_420_chr_3	rs110656886	rs42460993	113880893	113901073	20180	0.07112	Milk	113889410	113889414	QTL_ID=64007	trait=Milk_riboflavin_content	Abbrev=RIBO	breed=holstein	rs134458891,rs136801407
4	block_87_chr_4	rs29013539	rs41653992	26796377	26854185	57808	0.08077	Milk	26854183	26854187	QTL_ID=26726	trait=Milk_protein_percentage	Abbrev=PP	breed=holstein	rs110562779
4	block_122_chr_4	rs42169452	rs110203552	36966333	36990307	23974	0.03454	Exterior	36966331	36966335	QTL_ID=28163	trait=Udder_cleft	Abbrev=UC	breed=holstein	MNB-42
4	block_219_chr_4	rs43402375	rs43400956	61247646	61322228	74582	0.05941	Production	61322226	61322230	QTL_ID=24712	trait=Body_weight_(weaning)	Abbrev=WWT	breed=holstein	rs434336014
4	block_219_chr_4	rs43402375	rs43400956	61247646	61322228	74582	0.05941	Production	61322226	61322230	QTL_ID=24781	trait=Body_weight_(yearling)	Abbrev=W365	breed=German_Black_Pied	rs29012226
4	block_239_chr_4	rs110877866	rs43401470	66103436	66153156	49720	0.03659	Production	66103434	66103438	QTL_ID=67025	trait=Body_weight_gain	Abbrev=BWG	breed=hereford,limousin,Angus	rs109038932
4	block_337_chr_4	rs42417266	rs109504087	91750789	91783379	32590	0.03856	Exterior	91750787	91750791	QTL_ID=40637	trait=Dairy_form	Abbrev=DYF	breed=holstein	rs41652700
4	block_337_chr_4	rs42417266	rs109504087	91750789	91783379	32590	0.03856	Exterior	91750787	91750791	QTL_ID=40645	trait=Teat_length	Abbrev=TLGTH	breed=holstein	rs41652700
4	block_337_chr_4	rs42417266	rs109504087	91750789	91783379	32590	0.03856	Exterior	91750787	91750791	QTL_ID=40646	trait=Udder_depth	Abbrev=UDPTH	breed=holstein	rs41652700
4	block_337_chr_4	rs42417266	rs109504087	91750789	91783379	32590	0.03856	Health	91750787	91750791	QTL_ID=40643	trait=Somatic_cell_score	Abbrev=SCS	breed=holstein	rs41652700
4	block_337_chr_4	rs42417266	rs109504087	91750789	91783379	32590	0.03856	Production	91750787	91750791	QTL_ID=40640	trait=Net_merit	Abbrev=NM	breed=holstein	rs41652700
4	block_337_chr_4	rs42417266	rs109504087	91750789	91783379	32590	0.03856	Production	91750787	91750791	QTL_ID=40641	trait=Length_of_productive_life	Abbrev=PL	breed=holstein	rs41652700
4	block_337_chr_4	rs42417266	rs109504087	91750789	91783379	32590	0.03856	Reproduction	91750787	91750791	QTL_ID=15389	trait=Gestation_length	Abbrev=GLENGTH	breed=holstein	rs41652700
4	block_337_chr_4	rs42417266	rs109504087	91750789	91783379	32590	0.03856	Reproduction	91750787	91750791	QTL_ID=15390	trait=Gestation_length	Abbrev=GLENGTH	breed=holstein	rs41652700
4	block_337_chr_4	rs42417266	rs109504087	91750789	91783379	32590	0.03856	Reproduction	91750787	91750791	QTL_ID=40636	trait=Calving_ease_(maternal)	Abbrev=CALEASE	breed=holstein	rs41652700
4	block_337_chr_4	rs42417266	rs109504087	91750789	91783379	32590	0.03856	Reproduction	91750787	91750791	QTL_ID=40638	trait=Daughter_pregnancy_rate	Abbrev=DPR	breed=holstein	rs41652700
4	block_337_chr_4	rs42417266	rs109504087	91750789	91783379	32590	0.03856	Reproduction	91750787	91750791	QTL_ID=40639	trait=Stillbirth_(maternal)	Abbrev=SB	breed=holstein	rs41652700
4	block_337_chr_4	rs42417266	rs109504087	91750789	91783379	32590	0.03856	Reproduction	91750787	91750791	QTL_ID=40642	trait=Calving_ease	Abbrev=CALEASE	breed=holstein	rs41652700
4	block_337_chr_4	rs42417266	rs109504087	91750789	91783379	32590	0.03856	Reproduction	91750787	91750791	QTL_ID=40644	trait=Stillbirth	Abbrev=SB	breed=holstein	rs41652700
4	block_337_chr_4	rs42417266	rs109504087	91750789	91783379	32590	0.03856	Reproduction	.	.	QTL_ID=60204	trait=Inseminations_per_conception	Abbrev=CONCEPT	breed=holstein	rs42417266
4	block_337_chr_4	rs42417266	rs109504087	91750789	91783379	32590	0.03856	Reproduction	.	.	QTL_ID=60901	trait=Interval_from_first_to_last_insemination	Abbrev=INSINT	breed=holstein	rs42417266
4	block_337_chr_4	rs42417266	rs109504087	91750789	91783379	32590	0.03856	Reproduction	.	.	QTL_ID=60903	trait=Interval_from_first_to_last_insemination	Abbrev=INSINT	breed=holstein	rs42417266
4	block_337_chr_4	rs42417266	rs109504087	91750789	91783379	32590	0.03856	Reproduction	.	.	QTL_ID=60924	trait=Interval_from_first_to_last_insemination	Abbrev=INSINT	breed=holstein	rs42417266
4	block_337_chr_4	rs42417266	rs109504087	91750789	91783379	32590	0.03856	Reproduction	.	.	QTL_ID=61346	trait=Interval_from_first_to_last_insemination	Abbrev=INSINT	breed=holstein	rs42417266
4	block_337_chr_4	rs42417266	rs109504087	91750789	91783379	32590	0.03856	Reproduction	.	.	QTL_ID=61347	trait=Interval_from_first_to_last_insemination	Abbrev=INSINT	breed=holstein	rs42417266
4	block_337_chr_4	rs42417266	rs109504087	91750789	91783379	32590	0.03856	Reproduction	.	.	QTL_ID=61349	trait=Interval_from_first_to_last_insemination	Abbrev=INSINT	breed=holstein	rs42417266
4	block_337_chr_4	rs42417266	rs109504087	91750789	91783379	32590	0.03856	Reproduction	.	.	QTL_ID=61353	trait=Interval_from_first_to_last_insemination	Abbrev=INSINT	breed=holstein	rs42417266
4	block_337_chr_4	rs42417266	rs109504087	91750789	91783379	32590	0.03856	Reproduction	.	.	QTL_ID=61947	trait=Inseminations_per_conception	Abbrev=CONCEPT	breed=holstein	rs42417266
4	block_337_chr_4	rs42417266	rs109504087	91750789	91783379	32590	0.03856	Reproduction	.	.	QTL_ID=61948	trait=Inseminations_per_conception	Abbrev=CONCEPT	breed=holstein	rs42417266
4	block_337_chr_4	rs42417266	rs109504087	91750789	91783379	32590	0.03856	Reproduction	.	.	QTL_ID=61949	trait=Inseminations_per_conception	Abbrev=CONCEPT	breed=holstein	rs42417266
4	block_337_chr_4	rs42417266	rs109504087	91750789	91783379	32590	0.03856	Reproduction	.	.	QTL_ID=61950	trait=Inseminations_per_conception	Abbrev=CONCEPT	breed=holstein	rs42417266
4	block_337_chr_4	rs42417266	rs109504087	91750789	91783379	32590	0.03856	Reproduction	.	.	QTL_ID=61951	trait=Inseminations_per_conception	Abbrev=CONCEPT	breed=holstein	rs42417266
4	block_416_chr_4	rs110004783	rs110012029	113718615	113741071	22456	0.03499	Production	113737538	113737542	QTL_ID=31703	trait=Average_daily_gain	Abbrev=ADG	breed=holstein	rs134142512
4	block_416_chr_4	rs110004783	rs110012029	113718615	113741071	22456	0.03499	Reproduction	113736054	113736058	QTL_ID=212130	trait=First_service_conception	Abbrev=FSC	breed=holstein	rs210150716
5	block_48_chr_5	rs109443432	rs41576637	13197225	13236807	39582	0.04801	Milk	13236805	13236809	QTL_ID=125442	trait=Lactation_persistency	Abbrev=LACTPER	breed=gelbvieh	rs384679906
5	block_92_chr_5	rs29002549	rs29003499	30184122	30204315	20193	0.05086	Production	30184901	30184905	QTL_ID=122667	trait=Length_of_productive_life	Abbrev=PL	breed=holstein	rs136538217
5	block_92_chr_5	rs29002549	rs29003499	30184122	30204315	20193	0.05086	Production	30184901	30184905	QTL_ID=123355	trait=Length_of_productive_life	Abbrev=PL	breed=holstein	rs136216231
5	block_92_chr_5	rs29002549	rs29003499	30184122	30204315	20193	0.05086	Production	30189136	30189140	QTL_ID=122668	trait=Length_of_productive_life	Abbrev=PL	breed=holstein	rs110351880
5	block_92_chr_5	rs29002549	rs29003499	30184122	30204315	20193	0.05086	Production	30189136	30189140	QTL_ID=123356	trait=Length_of_productive_life	Abbrev=PL	breed=holstein	rs137424743
5	block_92_chr_5	rs29002549	rs29003499	30184122	30204315	20193	0.05086	Production	30196333	30196337	QTL_ID=122669	trait=Length_of_productive_life	Abbrev=PL	breed=holstein	rs135842805
5	block_92_chr_5	rs29002549	rs29003499	30184122	30204315	20193	0.05086	Production	30196333	30196337	QTL_ID=123357	trait=Length_of_productive_life	Abbrev=PL	breed=holstein	rs109203511
5	block_92_chr_5	rs29002549	rs29003499	30184122	30204315	20193	0.05086	Production	30202419	30202423	QTL_ID=122670	trait=Length_of_productive_life	Abbrev=PL	breed=holstein	rs133689198
5	block_92_chr_5	rs29002549	rs29003499	30184122	30204315	20193	0.05086	Production	30202419	30202423	QTL_ID=123358	trait=Length_of_productive_life	Abbrev=PL	breed=holstein	rs135373021
5	block_92_chr_5	rs29002549	rs29003499	30184122	30204315	20193	0.05086	Reproduction	30184120	30184124	QTL_ID=30147	trait=Interval_to_first_estrus_after_calving	Abbrev=CALEST	breed=holstein	rs109774980
5	block_92_chr_5	rs29002549	rs29003499	30184122	30204315	20193	0.05086	Reproduction	30184120	30184124	QTL_ID=30382	trait=Interval_to_first_estrus_after_calving	Abbrev=CALEST	breed=holstein	rs109903159
5	block_92_chr_5	rs29002549	rs29003499	30184122	30204315	20193	0.05086	Reproduction	30204313	30204317	QTL_ID=30171	trait=Interval_to_first_estrus_after_calving	Abbrev=CALEST	breed=holstein	rs110049706
5	block_92_chr_5	rs29002549	rs29003499	30184122	30204315	20193	0.05086	Reproduction	30204313	30204317	QTL_ID=30409	trait=Interval_to_first_estrus_after_calving	Abbrev=CALEST	breed=holstein	rs110029418
5	block_95_chr_5	rs110188299	rs29024154	32692339	32758717	66378	0.0435	Milk	32758715	32758719	QTL_ID=175368	trait=Milk_protein_yield	Abbrev=PY	breed=holstein	rs134071933
5	block_95_chr_5	rs110188299	rs29024154	32692339	32758717	66378	0.0435	Production	32692337	32692341	QTL_ID=167191	trait=Residual_feed_intake	Abbrev=RFI	breed=holstein	rs110509437
5	block_95_chr_5	rs110188299	rs29024154	32692339	32758717	66378	0.0435	Production	32692337	32692341	QTL_ID=21049	trait=Residual_feed_intake	Abbrev=RFI	breed=Fleckvieh	rs208147570
5	block_108_chr_5	rs41590051	rs41629283	37677811	37749836	72025	0.04044	Milk	37687371	37687375	QTL_ID=111318	trait=Milk_kappa-casein_percentage	Abbrev=MKCASP	breed=holstein	rs41595610
5	block_108_chr_5	rs41590051	rs41629283	37677811	37749836	72025	0.04044	Production	37749834	37749838	QTL_ID=67141	trait=Body_weight_(weaning)	Abbrev=WWT	breed=holstein	rs449801183
5	block_108_chr_5	rs41590051	rs41629283	37677811	37749836	72025	0.04044	Production	37749834	37749838	QTL_ID=67142	trait=Body_weight_gain	Abbrev=BWG	breed=Angus	rs133198065
5	block_108_chr_5	rs41590051	rs41629283	37677811	37749836	72025	0.04044	Reproduction	37733043	37733047	QTL_ID=212550	trait=Inseminations_per_conception	Abbrev=CONCEPT	breed=holstein	rs109623827
5	block_180_chr_5	rs109739902	rs109980961	73581692	73619330	37638	0.03818	Reproduction	73619328	73619332	QTL_ID=194134	trait=Inseminations_per_conception	Abbrev=CONCEPT	breed=ayrshire,danish_red,Swedish_Red-and-White	rs41589401
5	block_198_chr_5	rs41602345	rs41602344	79170192	79217782	47590	0.03981	Exterior	79170190	79170194	QTL_ID=160844	trait=Laminitis	Abbrev=LAMIN	breed=holstein	rs110611021
5	block_302_chr_5	rs110844659	rs109886869	116015434	116134185	118751	0.03469	Milk	116134183	116134187	QTL_ID=32345	trait=Milk_delta-9-desaturase_content	Abbrev=D9D	breed=charolais,gelbvieh,hereford,limousin,pinzgauer,red_angus,red_poll,simmental,Angus	rs209727589
5	block_302_chr_5	rs110844659	rs109886869	116015434	116134185	118751	0.03469	Reproduction	116106906	116106910	QTL_ID=177003	trait=Conception_rate	Abbrev=CONCRATE	breed=holstein	rs208645989
5	block_303_chr_5	rs109513912	rs110659119	116391317	116448403	57086	0.0411	Exterior	116407273	116407277	QTL_ID=154119	trait=Stature	Abbrev=STA	breed=charolais,gelbvieh,hereford,limousin,pinzgauer,red_angus,red_poll,simmental,Angus	rs207550149
5	block_303_chr_5	rs109513912	rs110659119	116391317	116448403	57086	0.0411	Exterior	116407273	116407277	QTL_ID=154369	trait=Stature	Abbrev=STA	breed=holstein	rs109454650
5	block_303_chr_5	rs109513912	rs110659119	116391317	116448403	57086	0.0411	Milk	116391315	116391319	QTL_ID=163980	trait=Milk_fat_yield	Abbrev=FY	breed=blonde_d'aquitaine	rs208645989
5	block_303_chr_5	rs109513912	rs110659119	116391317	116448403	57086	0.0411	Milk	116409921	116409925	QTL_ID=156020	trait=Milk_tridecylic_acid_content	Abbrev=MFA-C13:0	breed=holstein	rs109248021
5	block_303_chr_5	rs109513912	rs110659119	116391317	116448403	57086	0.0411	Milk	116422293	116422297	QTL_ID=163975	trait=Milk_fat_yield	Abbrev=FY	breed=holstein	rs109248021
5	block_307_chr_5	rs108949981	rs109986509	117155996	117194502	38506	0.03875	Milk	117169707	117169711	QTL_ID=214737	trait=Milk_protein_percentage	Abbrev=PP	breed=holstein	rs383531735
5	block_307_chr_5	rs108949981	rs109986509	117155996	117194502	38506	0.03875	Milk	117175494	117175498	QTL_ID=105262	trait=Milk_protein_percentage	Abbrev=PP	breed=jersey,limousin	rs383551190
5	block_307_chr_5	rs108949981	rs109986509	117155996	117194502	38506	0.03875	Milk	117175494	117175498	QTL_ID=70123	trait=Milk_zinc_content	Abbrev=MZN	breed=holstein	rs383516895
5	block_323_chr_5	rs43036671	rs41657101	119406813	119463301	56488	0.03468	Production	119441238	119441242	QTL_ID=67081	trait=Body_weight_(yearling)	Abbrev=W365	breed=holstein	rs108985661
5	block_323_chr_5	rs43036671	rs41657101	119406813	119463301	56488	0.03468	Reproduction	119424099	119424103	QTL_ID=181216	trait=Conception_rate	Abbrev=CONCRATE	breed=Angus	rs134436026
6	block_4_chr_6	rs110710192	rs41663389	641260	670124	28864	0.06235	Exterior	641258	641262	QTL_ID=41728	trait=Feet_and_leg_conformation	Abbrev=FTLEG	breed=Angus	rs135314769
6	block_4_chr_6	rs110710192	rs41663389	641260	670124	28864	0.06235	Exterior	641258	641262	QTL_ID=41731	trait=Teat_placement_-_front	Abbrev=FTPL	breed=gelbvieh	rs135411900
6	block_4_chr_6	rs110710192	rs41663389	641260	670124	28864	0.06235	Exterior	641258	641262	QTL_ID=41732	trait=Udder_attachment	Abbrev=UA	breed=gelbvieh	rs135640023
6	block_4_chr_6	rs110710192	rs41663389	641260	670124	28864	0.06235	Exterior	641258	641262	QTL_ID=41737	trait=Rear_leg_placement_-_rear_view	Abbrev=RLEGR	breed=gelbvieh	rs136137849
6	block_4_chr_6	rs110710192	rs41663389	641260	670124	28864	0.06235	Exterior	641258	641262	QTL_ID=41738	trait=Teat_placement_-_rear	Abbrev=RTPL	breed=charolais,gelbvieh,hereford,limousin,pinzgauer,red_angus,red_poll,simmental,Angus	rs136190942
6	block_4_chr_6	rs110710192	rs41663389	641260	670124	28864	0.06235	Exterior	641258	641262	QTL_ID=41739	trait=Udder_height	Abbrev=UHT	breed=charolais,gelbvieh,hereford,limousin,pinzgauer,red_angus,red_poll,simmental,Angus	rs136257809
6	block_4_chr_6	rs110710192	rs41663389	641260	670124	28864	0.06235	Exterior	641258	641262	QTL_ID=41741	trait=Stature	Abbrev=STA	breed=charolais,gelbvieh,hereford,limousin,pinzgauer,red_angus,red_poll,simmental,Angus	rs136413048
6	block_4_chr_6	rs110710192	rs41663389	641260	670124	28864	0.06235	Exterior	641258	641262	QTL_ID=41742	trait=Strength	Abbrev=STR	breed=charolais,gelbvieh,hereford,limousin,pinzgauer,red_angus,red_poll,simmental,Angus	rs136416413
6	block_4_chr_6	rs110710192	rs41663389	641260	670124	28864	0.06235	Exterior	641258	641262	QTL_ID=41743	trait=Udder_depth	Abbrev=UDPTH	breed=Girolando	rs136523990
6	block_4_chr_6	rs110710192	rs41663389	641260	670124	28864	0.06235	Milk	641258	641262	QTL_ID=41729	trait=Milk_fat_percentage	Abbrev=FP	breed=holstein	rs135384060
6	block_4_chr_6	rs110710192	rs41663389	641260	670124	28864	0.06235	Milk	641258	641262	QTL_ID=41733	trait=Milk_fat_yield	Abbrev=FY	breed=charolais,gelbvieh,hereford,limousin,pinzgauer,red_angus,red_poll,simmental,Angus	rs135680544
6	block_4_chr_6	rs110710192	rs41663389	641260	670124	28864	0.06235	Milk	641258	641262	QTL_ID=41735	trait=Milk_protein_percentage	Abbrev=PP	breed=holstein	rs135922395
6	block_4_chr_6	rs110710192	rs41663389	641260	670124	28864	0.06235	Milk	641258	641262	QTL_ID=41736	trait=Milk_protein_yield	Abbrev=PY	breed=gelbvieh	rs135937048
6	block_4_chr_6	rs110710192	rs41663389	641260	670124	28864	0.06235	Production	641258	641262	QTL_ID=41726	trait=Body_depth	Abbrev=BD	breed=Hanwoo	rs135125616
6	block_4_chr_6	rs110710192	rs41663389	641260	670124	28864	0.06235	Production	641258	641262	QTL_ID=41730	trait=PTA_type	Abbrev=PTAT	breed=Angus	rs135400595
6	block_4_chr_6	rs110710192	rs41663389	641260	670124	28864	0.06235	Production	641258	641262	QTL_ID=41734	trait=Net_merit	Abbrev=NM	breed=charolais,gelbvieh,hereford,limousin,pinzgauer,red_angus,red_poll,simmental,Angus	rs135688682
6	block_4_chr_6	rs110710192	rs41663389	641260	670124	28864	0.06235	Production	641258	641262	QTL_ID=41740	trait=Rump_width	Abbrev=RUMWD	breed=charolais,gelbvieh,hereford,limousin,pinzgauer,red_angus,red_poll,simmental,Angus	rs136283820
6	block_4_chr_6	rs110710192	rs41663389	641260	670124	28864	0.06235	Reproduction	641258	641262	QTL_ID=41727	trait=Calving_ease_(maternal)	Abbrev=CALEASE	breed=brangus	rs135147861
6	block_30_chr_6	rs109435946	rs42928688	6399976	6482619	82643	0.04249	Production	6458235	6458239	QTL_ID=67718	trait=Body_weight_(birth)	Abbrev=BW	breed=charolais,gelbvieh,hereford,limousin,simmental,Angus	rs210772544
6	block_30_chr_6	rs109435946	rs42928688	6399976	6482619	82643	0.04249	Production	6482617	6482621	QTL_ID=67717	trait=Body_weight_(birth)	Abbrev=BW	breed=charolais,gelbvieh,hereford,limousin,simmental,Angus	rs378653582
6	block_34_chr_6	rs43444992	rs41650750	7438139	7474743	36604	0.06035	Reproduction	7448713	7448717	QTL_ID=181217	trait=Conception_rate	Abbrev=CONCRATE	breed=charolais,gelbvieh,hereford,limousin,simmental,Angus	rs137493341
6	block_34_chr_6	rs43444992	rs41650750	7438139	7474743	36604	0.06035	Reproduction	7448713	7448717	QTL_ID=181464	trait=Inseminations_per_conception	Abbrev=CONCEPT	breed=charolais,gelbvieh,hereford,limousin,simmental,Angus	rs137562559
6	block_58_chr_6	rs108980492	rs109475571	13072385	13132427	60042	0.03446	Reproduction	13072383	13072387	QTL_ID=106787	trait=Conception_rate	Abbrev=CONCRATE	breed=charolais,gelbvieh,hereford,limousin,simmental,Angus	rs381863189
6	block_62_chr_6	rs41593701	rs41658357	13707108	13728584	21476	0.03494	Production	13728582	13728586	QTL_ID=24714	trait=Body_weight_(weaning)	Abbrev=WWT	breed=charolais,gelbvieh,hereford,limousin,simmental,Angus	rs136527265
6	block_104_chr_6	rs42547296	rs41664505	23503327	23564107	60780	0.04494	Health	23533173	23533177	QTL_ID=25244	trait=Clinical_mastitis	Abbrev=CM	breed=charolais,gelbvieh,hereford,limousin,simmental,Angus	rs137452521
6	block_104_chr_6	rs42547296	rs41664505	23503327	23564107	60780	0.04494	Production	23503325	23503329	QTL_ID=67693	trait=Body_weight_(yearling)	Abbrev=W365	breed=gelbvieh	rs137397993
6	block_104_chr_6	rs42547296	rs41664505	23503327	23564107	60780	0.04494	Production	23503325	23503329	QTL_ID=67694	trait=Body_weight_gain	Abbrev=BWG	breed=charolais,gelbvieh,hereford,limousin,simmental,Angus	rs137452521
6	block_116_chr_6	rs29023061	rs41613697	28940832	28978809	37977	0.04491	Production	28940830	28940834	QTL_ID=66480	trait=Body_weight_(yearling)	Abbrev=W365	breed=charolais,gelbvieh,hereford,limousin,simmental,Angus	rs110684574
6	block_116_chr_6	rs29023061	rs41613697	28940832	28978809	37977	0.04491	Production	28940830	28940834	QTL_ID=66481	trait=Body_weight_gain	Abbrev=BWG	breed=charolais,gelbvieh,hereford,limousin,simmental,Angus	rs110686471
6	block_116_chr_6	rs29023061	rs41613697	28940832	28978809	37977	0.04491	Production	28978807	28978811	QTL_ID=164248	trait=Body_weight_(birth)	Abbrev=BW	breed=charolais,gelbvieh,hereford,limousin,simmental,Angus	rs133603814
6	block_118_chr_6	rs108944957	rs110131710	29357249	29406846	49597	0.03733	Production	29357247	29357251	QTL_ID=66312	trait=Body_weight_(birth)	Abbrev=BW	breed=charolais,gelbvieh,hereford,limousin,simmental,Angus	rs136289377
6	block_118_chr_6	rs108944957	rs110131710	29357249	29406846	49597	0.03733	Production	29357247	29357251	QTL_ID=67163	trait=Body_weight_gain	Abbrev=BWG	breed=charolais,gelbvieh,hereford,limousin,simmental,Angus	rs136376648
6	block_118_chr_6	rs108944957	rs110131710	29357249	29406846	49597	0.03733	Production	29406844	29406848	QTL_ID=67301	trait=Body_weight_(birth)	Abbrev=BW	breed=charolais,gelbvieh,hereford,limousin,simmental,Angus	rs136827092
6	block_118_chr_6	rs108944957	rs110131710	29357249	29406846	49597	0.03733	Production	29406844	29406848	QTL_ID=67302	trait=Body_weight_(yearling)	Abbrev=W365	breed=charolais,gelbvieh,hereford,limousin,simmental,Angus	rs136996212
6	block_118_chr_6	rs108944957	rs110131710	29357249	29406846	49597	0.03733	Production	29406844	29406848	QTL_ID=67303	trait=Body_weight_gain	Abbrev=BWG	breed=charolais,gelbvieh,hereford,limousin,simmental,Angus	rs136998304
6	block_145_chr_6	rs29026121	rs110517212	37778924	37933250	154326	0.04626	Milk	37822621	37822625	QTL_ID=137941	trait=Milk_protein_percentage	Abbrev=PP	breed=holstein	rs137167583
6	block_145_chr_6	rs29026121	rs110517212	37778924	37933250	154326	0.04626	Production	37778922	37778926	QTL_ID=24534	trait=Body_weight_(birth)	Abbrev=BW	breed=jersey	rs134204922
6	block_145_chr_6	rs29026121	rs110517212	37778924	37933250	154326	0.04626	Production	37796643	37796647	QTL_ID=188788	trait=Metabolic_body_weight	Abbrev=MBW	breed=charolais,gelbvieh,hereford,limousin,simmental,Angus	rs110622907
6	block_145_chr_6	rs29026121	rs110517212	37778924	37933250	154326	0.04626	Production	37796723	37796727	QTL_ID=189006	trait=Metabolic_body_weight	Abbrev=MBW	breed=charolais,gelbvieh,hereford,limousin,simmental,Angus	rs42605340
6	block_145_chr_6	rs29026121	rs110517212	37778924	37933250	154326	0.04626	Production	37796919	37796923	QTL_ID=131393	trait=Metabolic_body_weight	Abbrev=MBW	breed=charolais,gelbvieh,hereford,limousin,simmental,Angus	rs110840320
6	block_145_chr_6	rs29026121	rs110517212	37778924	37933250	154326	0.04626	Production	37796919	37796923	QTL_ID=183229	trait=Dry_matter_intake	Abbrev=DMI	breed=charolais,gelbvieh,hereford,limousin,simmental,Angus	rs110909656
6	block_145_chr_6	rs29026121	rs110517212	37778924	37933250	154326	0.04626	Production	37796919	37796923	QTL_ID=185377	trait=Average_daily_gain	Abbrev=ADG	breed=charolais,gelbvieh,hereford,limousin,simmental,Angus	rs136189530
6	block_145_chr_6	rs29026121	rs110517212	37778924	37933250	154326	0.04626	Production	37796919	37796923	QTL_ID=188594	trait=Metabolic_body_weight	Abbrev=MBW	breed=charolais,gelbvieh,hereford,limousin,simmental,Angus	rs461271920
6	block_145_chr_6	rs29026121	rs110517212	37778924	37933250	154326	0.04626	Production	37797231	37797235	QTL_ID=183249	trait=Dry_matter_intake	Abbrev=DMI	breed=charolais,gelbvieh,hereford,limousin,simmental,Angus	rs42605340
6	block_145_chr_6	rs29026121	rs110517212	37778924	37933250	154326	0.04626	Production	37797231	37797235	QTL_ID=185384	trait=Average_daily_gain	Abbrev=ADG	breed=charolais,gelbvieh,hereford,limousin,simmental,Angus	rs109382129
6	block_145_chr_6	rs29026121	rs110517212	37778924	37933250	154326	0.04626	Production	37797231	37797235	QTL_ID=188609	trait=Metabolic_body_weight	Abbrev=MBW	breed=charolais,gelbvieh,hereford,limousin,simmental,Angus	rs110467477
6	block_145_chr_6	rs29026121	rs110517212	37778924	37933250	154326	0.04626	Production	37801920	37801924	QTL_ID=185730	trait=Average_daily_gain	Abbrev=ADG	breed=charolais,gelbvieh,hereford,limousin,simmental,Angus	rs109397568
6	block_145_chr_6	rs29026121	rs110517212	37778924	37933250	154326	0.04626	Production	37801920	37801924	QTL_ID=189259	trait=Metabolic_body_weight	Abbrev=MBW	breed=charolais,gelbvieh,hereford,limousin,simmental,Angus	rs110909656
6	block_145_chr_6	rs29026121	rs110517212	37778924	37933250	154326	0.04626	Production	37803152	37803156	QTL_ID=184086	trait=Average_daily_gain	Abbrev=ADG	breed=charolais,gelbvieh,hereford,limousin,simmental,Angus	rs134171932
6	block_145_chr_6	rs29026121	rs110517212	37778924	37933250	154326	0.04626	Production	37803152	37803156	QTL_ID=186696	trait=Metabolic_body_weight	Abbrev=MBW	breed=charolais,gelbvieh,hereford,limousin,simmental,Angus	rs379908467
6	block_145_chr_6	rs29026121	rs110517212	37778924	37933250	154326	0.04626	Production	37803935	37803939	QTL_ID=184203	trait=Average_daily_gain	Abbrev=ADG	breed=charolais,gelbvieh,hereford,limousin,simmental,Angus	rs43458085
6	block_145_chr_6	rs29026121	rs110517212	37778924	37933250	154326	0.04626	Production	37803935	37803939	QTL_ID=186867	trait=Metabolic_body_weight	Abbrev=MBW	breed=charolais,gelbvieh,hereford,limousin,simmental,Angus	rs43461065
6	block_145_chr_6	rs29026121	rs110517212	37778924	37933250	154326	0.04626	Production	37803939	37803943	QTL_ID=183992	trait=Average_daily_gain	Abbrev=ADG	breed=charolais,gelbvieh,hereford,limousin,simmental,Angus	rs133258175
6	block_145_chr_6	rs29026121	rs110517212	37778924	37933250	154326	0.04626	Production	37803939	37803943	QTL_ID=186566	trait=Metabolic_body_weight	Abbrev=MBW	breed=charolais,gelbvieh,hereford,limousin,simmental,Angus	rs43458080
6	block_145_chr_6	rs29026121	rs110517212	37778924	37933250	154326	0.04626	Production	37804727	37804731	QTL_ID=184502	trait=Average_daily_gain	Abbrev=ADG	breed=charolais,gelbvieh,hereford,limousin,simmental,Angus	rs382436571
6	block_145_chr_6	rs29026121	rs110517212	37778924	37933250	154326	0.04626	Production	37804727	37804731	QTL_ID=187274	trait=Metabolic_body_weight	Abbrev=MBW	breed=charolais,gelbvieh,hereford,limousin,simmental,Angus	rs132834111
6	block_145_chr_6	rs29026121	rs110517212	37778924	37933250	154326	0.04626	Production	37805095	37805099	QTL_ID=184296	trait=Average_daily_gain	Abbrev=ADG	breed=charolais,gelbvieh,hereford,limousin,simmental,Angus	rs108951197
6	block_145_chr_6	rs29026121	rs110517212	37778924	37933250	154326	0.04626	Production	37805095	37805099	QTL_ID=186976	trait=Metabolic_body_weight	Abbrev=MBW	breed=charolais,gelbvieh,hereford,limousin,simmental,Angus	rs43461060
6	block_145_chr_6	rs29026121	rs110517212	37778924	37933250	154326	0.04626	Production	37806068	37806072	QTL_ID=185212	trait=Average_daily_gain	Abbrev=ADG	breed=charolais,gelbvieh,hereford,limousin,simmental,Angus	rs110840976
6	block_145_chr_6	rs29026121	rs110517212	37778924	37933250	154326	0.04626	Production	37806068	37806072	QTL_ID=188356	trait=Metabolic_body_weight	Abbrev=MBW	breed=charolais,gelbvieh,hereford,limousin,simmental,Angus	rs136330469
6	block_145_chr_6	rs29026121	rs110517212	37778924	37933250	154326	0.04626	Production	37809964	37809968	QTL_ID=184447	trait=Average_daily_gain	Abbrev=ADG	breed=charolais,gelbvieh,hereford,limousin,simmental,Angus	rs475559903
6	block_145_chr_6	rs29026121	rs110517212	37778924	37933250	154326	0.04626	Production	37809964	37809968	QTL_ID=187197	trait=Metabolic_body_weight	Abbrev=MBW	breed=charolais,gelbvieh,hereford,limousin,simmental,Angus	rs43461046
6	block_145_chr_6	rs29026121	rs110517212	37778924	37933250	154326	0.04626	Production	37810503	37810507	QTL_ID=131388	trait=Metabolic_body_weight	Abbrev=MBW	breed=jersey	rs109125092
6	block_145_chr_6	rs29026121	rs110517212	37778924	37933250	154326	0.04626	Production	37810503	37810507	QTL_ID=185163	trait=Average_daily_gain	Abbrev=ADG	breed=charolais,gelbvieh,hereford,limousin,simmental,Angus	rs110187124
6	block_145_chr_6	rs29026121	rs110517212	37778924	37933250	154326	0.04626	Production	37810503	37810507	QTL_ID=188279	trait=Metabolic_body_weight	Abbrev=MBW	breed=charolais,gelbvieh,hereford,limousin,simmental,Angus	rs135371470
6	block_145_chr_6	rs29026121	rs110517212	37778924	37933250	154326	0.04626	Production	37810777	37810781	QTL_ID=184651	trait=Average_daily_gain	Abbrev=ADG	breed=charolais,gelbvieh,hereford,limousin,simmental,Angus	rs43459952
6	block_145_chr_6	rs29026121	rs110517212	37778924	37933250	154326	0.04626	Production	37810777	37810781	QTL_ID=187505	trait=Metabolic_body_weight	Abbrev=MBW	breed=charolais,gelbvieh,hereford,limousin,simmental,Angus	rs135267115
6	block_145_chr_6	rs29026121	rs110517212	37778924	37933250	154326	0.04626	Production	37811031	37811035	QTL_ID=190131	trait=Metabolic_body_weight	Abbrev=MBW	breed=charolais,gelbvieh,hereford,limousin,simmental,Angus	rs135988356
6	block_145_chr_6	rs29026121	rs110517212	37778924	37933250	154326	0.04626	Production	37811539	37811543	QTL_ID=184072	trait=Average_daily_gain	Abbrev=ADG	breed=charolais,gelbvieh,hereford,limousin,simmental,Angus	rs109579682
6	block_145_chr_6	rs29026121	rs110517212	37778924	37933250	154326	0.04626	Production	37811539	37811543	QTL_ID=186674	trait=Metabolic_body_weight	Abbrev=MBW	breed=charolais,gelbvieh,hereford,limousin,simmental,Angus	rs42728504
6	block_145_chr_6	rs29026121	rs110517212	37778924	37933250	154326	0.04626	Production	37811598	37811602	QTL_ID=131394	trait=Metabolic_body_weight	Abbrev=MBW	breed=charolais,holstein	rs133890939
6	block_145_chr_6	rs29026121	rs110517212	37778924	37933250	154326	0.04626	Production	37811598	37811602	QTL_ID=183886	trait=Average_daily_gain	Abbrev=ADG	breed=charolais,gelbvieh,hereford,limousin,simmental,Angus	rs109579682
6	block_145_chr_6	rs29026121	rs110517212	37778924	37933250	154326	0.04626	Production	37811598	37811602	QTL_ID=186399	trait=Metabolic_body_weight	Abbrev=MBW	breed=charolais,gelbvieh,hereford,limousin,simmental,Angus	rs109163366
6	block_145_chr_6	rs29026121	rs110517212	37778924	37933250	154326	0.04626	Production	37811806	37811810	QTL_ID=184557	trait=Average_daily_gain	Abbrev=ADG	breed=charolais,gelbvieh,hereford,limousin,simmental,Angus	rs132731940
6	block_145_chr_6	rs29026121	rs110517212	37778924	37933250	154326	0.04626	Production	37811806	37811810	QTL_ID=187357	trait=Metabolic_body_weight	Abbrev=MBW	breed=charolais,gelbvieh,hereford,limousin,simmental,Angus	rs378088121
6	block_145_chr_6	rs29026121	rs110517212	37778924	37933250	154326	0.04626	Production	37811945	37811949	QTL_ID=185341	trait=Average_daily_gain	Abbrev=ADG	breed=charolais,gelbvieh,hereford,limousin,simmental,Angus	rs133669403
6	block_145_chr_6	rs29026121	rs110517212	37778924	37933250	154326	0.04626	Production	37811945	37811949	QTL_ID=188540	trait=Metabolic_body_weight	Abbrev=MBW	breed=charolais,gelbvieh,hereford,limousin,simmental,Angus	rs378576513
6	block_145_chr_6	rs29026121	rs110517212	37778924	37933250	154326	0.04626	Production	37812325	37812329	QTL_ID=185430	trait=Average_daily_gain	Abbrev=ADG	breed=charolais,gelbvieh,hereford,limousin,simmental,Angus	rs109579682
6	block_145_chr_6	rs29026121	rs110517212	37778924	37933250	154326	0.04626	Production	37812325	37812329	QTL_ID=188675	trait=Metabolic_body_weight	Abbrev=MBW	breed=charolais,gelbvieh,hereford,limousin,simmental,Angus	rs381225434
6	block_145_chr_6	rs29026121	rs110517212	37778924	37933250	154326	0.04626	Production	37812519	37812523	QTL_ID=131389	trait=Metabolic_body_weight	Abbrev=MBW	breed=charolais,chianina,gelbvieh,hereford,holstein,limousin,piedmontese,red_angus,simmental,Angus,Maine-Anjou	rs135146886
6	block_145_chr_6	rs29026121	rs110517212	37778924	37933250	154326	0.04626	Production	37812519	37812523	QTL_ID=184916	trait=Average_daily_gain	Abbrev=ADG	breed=charolais,chianina,gelbvieh,hereford,holstein,limousin,piedmontese,red_angus,simmental,Angus,Maine-Anjou	rs137764029
6	block_145_chr_6	rs29026121	rs110517212	37778924	37933250	154326	0.04626	Production	37812519	37812523	QTL_ID=187896	trait=Metabolic_body_weight	Abbrev=MBW	breed=charolais,gelbvieh,hereford,limousin,simmental,Angus	rs29025709
6	block_145_chr_6	rs29026121	rs110517212	37778924	37933250	154326	0.04626	Production	37813024	37813028	QTL_ID=184604	trait=Average_daily_gain	Abbrev=ADG	breed=charolais,gelbvieh,hereford,limousin,pinzgauer,red_angus,red_poll,simmental,Angus	rs132852324
6	block_145_chr_6	rs29026121	rs110517212	37778924	37933250	154326	0.04626	Production	37813024	37813028	QTL_ID=187433	trait=Metabolic_body_weight	Abbrev=MBW	breed=charolais,gelbvieh,hereford,limousin,simmental,Angus	rs378359528
6	block_145_chr_6	rs29026121	rs110517212	37778924	37933250	154326	0.04626	Production	37813292	37813296	QTL_ID=184230	trait=Average_daily_gain	Abbrev=ADG	breed=charolais,gelbvieh,hereford,limousin,simmental,Angus	rs133651962
6	block_145_chr_6	rs29026121	rs110517212	37778924	37933250	154326	0.04626	Production	37813292	37813296	QTL_ID=186894	trait=Metabolic_body_weight	Abbrev=MBW	breed=charolais,gelbvieh,hereford,limousin,simmental,Angus	rs384279245
6	block_145_chr_6	rs29026121	rs110517212	37778924	37933250	154326	0.04626	Production	37813422	37813426	QTL_ID=185074	trait=Average_daily_gain	Abbrev=ADG	breed=charolais,gelbvieh,hereford,limousin,simmental,Angus	rs136209025
6	block_145_chr_6	rs29026121	rs110517212	37778924	37933250	154326	0.04626	Production	37813422	37813426	QTL_ID=188156	trait=Metabolic_body_weight	Abbrev=MBW	breed=charolais,gelbvieh,hereford,limousin,simmental,Angus	rs379921069
6	block_145_chr_6	rs29026121	rs110517212	37778924	37933250	154326	0.04626	Production	37813570	37813574	QTL_ID=131390	trait=Metabolic_body_weight	Abbrev=MBW	breed=charolais,chianina,gelbvieh,hereford,holstein,limousin,piedmontese,red_angus,simmental,Angus,Maine-Anjou	rs135146886
6	block_145_chr_6	rs29026121	rs110517212	37778924	37933250	154326	0.04626	Production	37813570	37813574	QTL_ID=183967	trait=Average_daily_gain	Abbrev=ADG	breed=charolais,gelbvieh,hereford,limousin,simmental,Angus	rs109579682
6	block_145_chr_6	rs29026121	rs110517212	37778924	37933250	154326	0.04626	Production	37813570	37813574	QTL_ID=186535	trait=Metabolic_body_weight	Abbrev=MBW	breed=charolais,gelbvieh,hereford,limousin,simmental,Angus	rs137814830
6	block_145_chr_6	rs29026121	rs110517212	37778924	37933250	154326	0.04626	Production	37813636	37813640	QTL_ID=185360	trait=Average_daily_gain	Abbrev=ADG	breed=charolais,gelbvieh,hereford,limousin,simmental,Angus	rs109164431
6	block_145_chr_6	rs29026121	rs110517212	37778924	37933250	154326	0.04626	Production	37813636	37813640	QTL_ID=188569	trait=Metabolic_body_weight	Abbrev=MBW	breed=charolais,gelbvieh,hereford,limousin,simmental,Angus	rs379069728
6	block_145_chr_6	rs29026121	rs110517212	37778924	37933250	154326	0.04626	Production	37813726	37813730	QTL_ID=183952	trait=Average_daily_gain	Abbrev=ADG	breed=charolais,gelbvieh,hereford,limousin,simmental,Angus	rs109579682
6	block_145_chr_6	rs29026121	rs110517212	37778924	37933250	154326	0.04626	Production	37813726	37813730	QTL_ID=186504	trait=Metabolic_body_weight	Abbrev=MBW	breed=charolais,gelbvieh,hereford,limousin,simmental,Angus	rs110827819
6	block_145_chr_6	rs29026121	rs110517212	37778924	37933250	154326	0.04626	Production	37813962	37813966	QTL_ID=185006	trait=Average_daily_gain	Abbrev=ADG	breed=charolais,gelbvieh,hereford,limousin,simmental,Angus	rs211174722
6	block_145_chr_6	rs29026121	rs110517212	37778924	37933250	154326	0.04626	Production	37813962	37813966	QTL_ID=188047	trait=Metabolic_body_weight	Abbrev=MBW	breed=charolais,gelbvieh,hereford,limousin,simmental,Angus	rs379001508
6	block_145_chr_6	rs29026121	rs110517212	37778924	37933250	154326	0.04626	Production	37814263	37814267	QTL_ID=184894	trait=Average_daily_gain	Abbrev=ADG	breed=charolais,chianina,gelbvieh,hereford,holstein,limousin,piedmontese,red_angus,simmental,Angus,Maine-Anjou	rs209835995
6	block_145_chr_6	rs29026121	rs110517212	37778924	37933250	154326	0.04626	Production	37814263	37814267	QTL_ID=187867	trait=Metabolic_body_weight	Abbrev=MBW	breed=charolais,gelbvieh,hereford,limousin,simmental,Angus	rs211092862
6	block_145_chr_6	rs29026121	rs110517212	37778924	37933250	154326	0.04626	Production	37814637	37814641	QTL_ID=184862	trait=Average_daily_gain	Abbrev=ADG	breed=norwegian_red	rs135489630
6	block_145_chr_6	rs29026121	rs110517212	37778924	37933250	154326	0.04626	Production	37814637	37814641	QTL_ID=187821	trait=Metabolic_body_weight	Abbrev=MBW	breed=charolais,gelbvieh,hereford,limousin,simmental,Angus	rs137815186
6	block_145_chr_6	rs29026121	rs110517212	37778924	37933250	154326	0.04626	Production	37814926	37814930	QTL_ID=131391	trait=Metabolic_body_weight	Abbrev=MBW	breed=norwegian_red	rs133890939
6	block_145_chr_6	rs29026121	rs110517212	37778924	37933250	154326	0.04626	Production	37814926	37814930	QTL_ID=184518	trait=Average_daily_gain	Abbrev=ADG	breed=charolais,gelbvieh,hereford,limousin,simmental,Angus	rs110990855
6	block_145_chr_6	rs29026121	rs110517212	37778924	37933250	154326	0.04626	Production	37814926	37814930	QTL_ID=187303	trait=Metabolic_body_weight	Abbrev=MBW	breed=charolais,gelbvieh,hereford,limousin,simmental,Angus	rs377846039
6	block_145_chr_6	rs29026121	rs110517212	37778924	37933250	154326	0.04626	Production	37815232	37815236	QTL_ID=190132	trait=Metabolic_body_weight	Abbrev=MBW	breed=charolais,gelbvieh,hereford,limousin,pinzgauer,red_angus,red_poll,simmental,Angus	rs137387807
6	block_145_chr_6	rs29026121	rs110517212	37778924	37933250	154326	0.04626	Production	37815455	37815459	QTL_ID=184749	trait=Average_daily_gain	Abbrev=ADG	breed=charolais,gelbvieh,hereford,limousin,pinzgauer,red_angus,red_poll,simmental,Angus	rs133767492
6	block_145_chr_6	rs29026121	rs110517212	37778924	37933250	154326	0.04626	Production	37815455	37815459	QTL_ID=187649	trait=Metabolic_body_weight	Abbrev=MBW	breed=charolais,gelbvieh,hereford,limousin,simmental,Angus	rs381489766
6	block_145_chr_6	rs29026121	rs110517212	37778924	37933250	154326	0.04626	Production	37815487	37815491	QTL_ID=185180	trait=Average_daily_gain	Abbrev=ADG	breed=charolais,gelbvieh,hereford,limousin,simmental,Angus	rs133669403
6	block_145_chr_6	rs29026121	rs110517212	37778924	37933250	154326	0.04626	Production	37815487	37815491	QTL_ID=188308	trait=Metabolic_body_weight	Abbrev=MBW	breed=norwegian_red	rs381935597
6	block_145_chr_6	rs29026121	rs110517212	37778924	37933250	154326	0.04626	Production	37815613	37815617	QTL_ID=131392	trait=Metabolic_body_weight	Abbrev=MBW	breed=norwegian_red	rs133890939
6	block_145_chr_6	rs29026121	rs110517212	37778924	37933250	154326	0.04626	Production	37815613	37815617	QTL_ID=184364	trait=Average_daily_gain	Abbrev=ADG	breed=charolais,gelbvieh,hereford,limousin,simmental,Angus	rs385019558
6	block_145_chr_6	rs29026121	rs110517212	37778924	37933250	154326	0.04626	Production	37815613	37815617	QTL_ID=187064	trait=Metabolic_body_weight	Abbrev=MBW	breed=charolais,gelbvieh,hereford,limousin,simmental,Angus	rs384476493
6	block_145_chr_6	rs29026121	rs110517212	37778924	37933250	154326	0.04626	Production	37815804	37815808	QTL_ID=185450	trait=Average_daily_gain	Abbrev=ADG	breed=charolais,gelbvieh,hereford,limousin,simmental,Angus	rs137537655
6	block_145_chr_6	rs29026121	rs110517212	37778924	37933250	154326	0.04626	Production	37815804	37815808	QTL_ID=188713	trait=Metabolic_body_weight	Abbrev=MBW	breed=charolais,gelbvieh,hereford,limousin,simmental,Angus	rs383140066
6	block_145_chr_6	rs29026121	rs110517212	37778924	37933250	154326	0.04626	Production	37815870	37815874	QTL_ID=184928	trait=Average_daily_gain	Abbrev=ADG	breed=charolais,gelbvieh,hereford,limousin,simmental,Angus	rs133368290
6	block_145_chr_6	rs29026121	rs110517212	37778924	37933250	154326	0.04626	Production	37815870	37815874	QTL_ID=187913	trait=Metabolic_body_weight	Abbrev=MBW	breed=charolais,gelbvieh,hereford,limousin,simmental,Angus	rs135916381
6	block_145_chr_6	rs29026121	rs110517212	37778924	37933250	154326	0.04626	Production	37815916	37815920	QTL_ID=184980	trait=Average_daily_gain	Abbrev=ADG	breed=charolais,gelbvieh,hereford,limousin,simmental,Angus	rs135432595
6	block_145_chr_6	rs29026121	rs110517212	37778924	37933250	154326	0.04626	Production	37815916	37815920	QTL_ID=188005	trait=Metabolic_body_weight	Abbrev=MBW	breed=charolais,gelbvieh,hereford,limousin,simmental,Angus	rs29025709
6	block_145_chr_6	rs29026121	rs110517212	37778924	37933250	154326	0.04626	Production	37816009	37816013	QTL_ID=185204	trait=Average_daily_gain	Abbrev=ADG	breed=charolais,gelbvieh,hereford,limousin,simmental,Angus	rs133669403
6	block_145_chr_6	rs29026121	rs110517212	37778924	37933250	154326	0.04626	Production	37816009	37816013	QTL_ID=188342	trait=Metabolic_body_weight	Abbrev=MBW	breed=charolais,gelbvieh,hereford,limousin,simmental,Angus	rs382418875
6	block_145_chr_6	rs29026121	rs110517212	37778924	37933250	154326	0.04626	Production	37816190	37816194	QTL_ID=185296	trait=Average_daily_gain	Abbrev=ADG	breed=charolais,gelbvieh,hereford,limousin,simmental,Angus	rs109579682
6	block_145_chr_6	rs29026121	rs110517212	37778924	37933250	154326	0.04626	Production	37816190	37816194	QTL_ID=188476	trait=Metabolic_body_weight	Abbrev=MBW	breed=charolais,gelbvieh,hereford,limousin,simmental,Angus	rs384290075
6	block_145_chr_6	rs29026121	rs110517212	37778924	37933250	154326	0.04626	Production	37816229	37816233	QTL_ID=131395	trait=Metabolic_body_weight	Abbrev=MBW	breed=charolais,gelbvieh,hereford,limousin,pinzgauer,red_angus,red_poll,simmental,Angus	rs108961122
6	block_145_chr_6	rs29026121	rs110517212	37778924	37933250	154326	0.04626	Production	37816229	37816233	QTL_ID=185184	trait=Average_daily_gain	Abbrev=ADG	breed=charolais,gelbvieh,hereford,limousin,simmental,Angus	rs133669403
6	block_145_chr_6	rs29026121	rs110517212	37778924	37933250	154326	0.04626	Production	37816229	37816233	QTL_ID=188314	trait=Metabolic_body_weight	Abbrev=MBW	breed=charolais,gelbvieh,hereford,limousin,simmental,Angus	rs382198410
6	block_145_chr_6	rs29026121	rs110517212	37778924	37933250	154326	0.04626	Production	37816298	37816302	QTL_ID=185114	trait=Average_daily_gain	Abbrev=ADG	breed=charolais,gelbvieh,hereford,limousin,simmental,Angus	rs210509806
6	block_145_chr_6	rs29026121	rs110517212	37778924	37933250	154326	0.04626	Production	37816298	37816302	QTL_ID=188213	trait=Metabolic_body_weight	Abbrev=MBW	breed=holstein	rs381425955
6	block_145_chr_6	rs29026121	rs110517212	37778924	37933250	154326	0.04626	Production	37816495	37816499	QTL_ID=185829	trait=Average_daily_gain	Abbrev=ADG	breed=charolais,gelbvieh,hereford,limousin,simmental,Angus	rs136300583
6	block_145_chr_6	rs29026121	rs110517212	37778924	37933250	154326	0.04626	Production	37816495	37816499	QTL_ID=189427	trait=Metabolic_body_weight	Abbrev=MBW	breed=charolais,gelbvieh,hereford,limousin,simmental,Angus	rs380847166
6	block_145_chr_6	rs29026121	rs110517212	37778924	37933250	154326	0.04626	Production	37816533	37816537	QTL_ID=185972	trait=Average_daily_gain	Abbrev=ADG	breed=charolais,gelbvieh,hereford,limousin,simmental,Angus	rs109579682
6	block_145_chr_6	rs29026121	rs110517212	37778924	37933250	154326	0.04626	Production	37816533	37816537	QTL_ID=189648	trait=Metabolic_body_weight	Abbrev=MBW	breed=charolais,gelbvieh,hereford,limousin,simmental,Angus	rs381539612
6	block_145_chr_6	rs29026121	rs110517212	37778924	37933250	154326	0.04626	Production	37816585	37816589	QTL_ID=186045	trait=Average_daily_gain	Abbrev=ADG	breed=charolais,gelbvieh,hereford,limousin,simmental,Angus	rs29025436
6	block_145_chr_6	rs29026121	rs110517212	37778924	37933250	154326	0.04626	Production	37816585	37816589	QTL_ID=189795	trait=Metabolic_body_weight	Abbrev=MBW	breed=charolais,gelbvieh,hereford,limousin,simmental,Angus	rs382253070
6	block_145_chr_6	rs29026121	rs110517212	37778924	37933250	154326	0.04626	Production	37816752	37816756	QTL_ID=183504	trait=Dry_matter_intake	Abbrev=DMI	breed=charolais,gelbvieh,hereford,limousin,simmental,Angus	rs29025709
6	block_145_chr_6	rs29026121	rs110517212	37778924	37933250	154326	0.04626	Production	37816752	37816756	QTL_ID=185010	trait=Average_daily_gain	Abbrev=ADG	breed=charolais,gelbvieh,hereford,limousin,simmental,Angus	rs110869563
6	block_145_chr_6	rs29026121	rs110517212	37778924	37933250	154326	0.04626	Production	37816752	37816756	QTL_ID=188053	trait=Metabolic_body_weight	Abbrev=MBW	breed=charolais,gelbvieh,hereford,limousin,simmental,Angus	rs379530844
6	block_145_chr_6	rs29026121	rs110517212	37778924	37933250	154326	0.04626	Production	37816971	37816975	QTL_ID=185036	trait=Average_daily_gain	Abbrev=ADG	breed=charolais,gelbvieh,hereford,limousin,simmental,Angus	rs134734516
6	block_145_chr_6	rs29026121	rs110517212	37778924	37933250	154326	0.04626	Production	37816971	37816975	QTL_ID=188092	trait=Metabolic_body_weight	Abbrev=MBW	breed=charolais,gelbvieh,hereford,limousin,simmental,Angus	rs379762586
6	block_145_chr_6	rs29026121	rs110517212	37778924	37933250	154326	0.04626	Production	37816992	37816996	QTL_ID=185233	trait=Average_daily_gain	Abbrev=ADG	breed=charolais,gelbvieh,hereford,limousin,simmental,Angus	rs133669403
6	block_145_chr_6	rs29026121	rs110517212	37778924	37933250	154326	0.04626	Production	37816992	37816996	QTL_ID=188392	trait=Metabolic_body_weight	Abbrev=MBW	breed=charolais,gelbvieh,hereford,limousin,simmental,Angus	rs383140066
6	block_145_chr_6	rs29026121	rs110517212	37778924	37933250	154326	0.04626	Production	37817076	37817080	QTL_ID=183134	trait=Dry_matter_intake	Abbrev=DMI	breed=charolais,gelbvieh,hereford,limousin,simmental,Angus	rs383082236
6	block_145_chr_6	rs29026121	rs110517212	37778924	37933250	154326	0.04626	Production	37817076	37817080	QTL_ID=185076	trait=Average_daily_gain	Abbrev=ADG	breed=charolais,gelbvieh,hereford,limousin,simmental,Angus	rs381119193
6	block_145_chr_6	rs29026121	rs110517212	37778924	37933250	154326	0.04626	Production	37817076	37817080	QTL_ID=188158	trait=Metabolic_body_weight	Abbrev=MBW	breed=charolais,gelbvieh,hereford,limousin,simmental,Angus	rs381225434
6	block_145_chr_6	rs29026121	rs110517212	37778924	37933250	154326	0.04626	Production	37817098	37817102	QTL_ID=184956	trait=Average_daily_gain	Abbrev=ADG	breed=charolais,gelbvieh,hereford,limousin,simmental,Angus	rs134106354
6	block_145_chr_6	rs29026121	rs110517212	37778924	37933250	154326	0.04626	Production	37817098	37817102	QTL_ID=187971	trait=Metabolic_body_weight	Abbrev=MBW	breed=charolais,gelbvieh,hereford,limousin,simmental,Angus	rs133131583
6	block_145_chr_6	rs29026121	rs110517212	37778924	37933250	154326	0.04626	Production	37817308	37817312	QTL_ID=183189	trait=Dry_matter_intake	Abbrev=DMI	breed=charolais,gelbvieh,hereford,limousin,simmental,Angus	rs29025709
6	block_145_chr_6	rs29026121	rs110517212	37778924	37933250	154326	0.04626	Production	37817308	37817312	QTL_ID=185287	trait=Average_daily_gain	Abbrev=ADG	breed=charolais,gelbvieh,hereford,limousin,simmental,Angus	rs133669403
6	block_145_chr_6	rs29026121	rs110517212	37778924	37933250	154326	0.04626	Production	37817308	37817312	QTL_ID=188466	trait=Metabolic_body_weight	Abbrev=MBW	breed=charolais,gelbvieh,hereford,limousin,simmental,Angus	rs384279245
6	block_145_chr_6	rs29026121	rs110517212	37778924	37933250	154326	0.04626	Production	37817587	37817591	QTL_ID=131398	trait=Metabolic_body_weight	Abbrev=MBW	breed=charolais,gelbvieh,hereford,limousin,pinzgauer,red_angus,red_poll,simmental,Angus	rs132784815
6	block_145_chr_6	rs29026121	rs110517212	37778924	37933250	154326	0.04626	Production	37817587	37817591	QTL_ID=164081	trait=Body_weight_(birth)	Abbrev=BW	breed=charolais,gelbvieh,hereford,limousin,simmental,Angus	rs133119840
6	block_145_chr_6	rs29026121	rs110517212	37778924	37933250	154326	0.04626	Production	37817587	37817591	QTL_ID=164124	trait=Body_weight_(weaning)	Abbrev=WWT	breed=charolais,gelbvieh,hereford,limousin,simmental,Angus	rs137386109
6	block_145_chr_6	rs29026121	rs110517212	37778924	37933250	154326	0.04626	Production	37817587	37817591	QTL_ID=164147	trait=Average_daily_gain	Abbrev=ADG	breed=charolais,gelbvieh,hereford,limousin,simmental,Angus	rs208065122
6	block_145_chr_6	rs29026121	rs110517212	37778924	37933250	154326	0.04626	Production	37817587	37817591	QTL_ID=164180	trait=Body_weight_(yearling)	Abbrev=W365	breed=charolais,gelbvieh,hereford,limousin,simmental,Angus	rs135556144
6	block_145_chr_6	rs29026121	rs110517212	37778924	37933250	154326	0.04626	Production	37817587	37817591	QTL_ID=164304	trait=Average_daily_gain	Abbrev=ADG	breed=charolais,gelbvieh,hereford,limousin,simmental,Angus	rs109354753
6	block_145_chr_6	rs29026121	rs110517212	37778924	37933250	154326	0.04626	Production	37817587	37817591	QTL_ID=164382	trait=Body_weight_(birth)	Abbrev=BW	breed=charolais,gelbvieh,hereford,limousin,simmental,Angus	rs109164131
6	block_145_chr_6	rs29026121	rs110517212	37778924	37933250	154326	0.04626	Production	37817587	37817591	QTL_ID=164426	trait=Body_weight_(weaning)	Abbrev=WWT	breed=charolais,gelbvieh,hereford,limousin,simmental,Angus	rs109795305
6	block_145_chr_6	rs29026121	rs110517212	37778924	37933250	154326	0.04626	Production	37817587	37817591	QTL_ID=164454	trait=Average_daily_gain	Abbrev=ADG	breed=charolais,gelbvieh,hereford,limousin,simmental,Angus	rs135321958
6	block_145_chr_6	rs29026121	rs110517212	37778924	37933250	154326	0.04626	Production	37817587	37817591	QTL_ID=164500	trait=Body_weight_(yearling)	Abbrev=W365	breed=charolais,gelbvieh,hereford,limousin,simmental,Angus	rs137627844
6	block_145_chr_6	rs29026121	rs110517212	37778924	37933250	154326	0.04626	Production	37817587	37817591	QTL_ID=184465	trait=Average_daily_gain	Abbrev=ADG	breed=charolais,gelbvieh,hereford,limousin,simmental,Angus	rs135909505
6	block_145_chr_6	rs29026121	rs110517212	37778924	37933250	154326	0.04626	Production	37817587	37817591	QTL_ID=187222	trait=Metabolic_body_weight	Abbrev=MBW	breed=charolais,gelbvieh,hereford,limousin,simmental,Angus	rs209562973
6	block_145_chr_6	rs29026121	rs110517212	37778924	37933250	154326	0.04626	Production	37817587	37817591	QTL_ID=23727	trait=Body_weight_(birth)	Abbrev=BW	breed=jersey	rs109159923
6	block_145_chr_6	rs29026121	rs110517212	37778924	37933250	154326	0.04626	Production	37817587	37817591	QTL_ID=23728	trait=Metabolic_body_weight	Abbrev=MBW	breed=jersey	rs134558618
6	block_145_chr_6	rs29026121	rs110517212	37778924	37933250	154326	0.04626	Production	37817587	37817591	QTL_ID=66395	trait=Body_weight_(birth)	Abbrev=BW	breed=charolais,gelbvieh,hereford,limousin,pinzgauer,red_angus,red_poll,simmental,Angus	rs137833908
6	block_145_chr_6	rs29026121	rs110517212	37778924	37933250	154326	0.04626	Production	37817587	37817591	QTL_ID=66396	trait=Body_weight_(yearling)	Abbrev=W365	breed=charolais,gelbvieh,hereford,limousin,pinzgauer,red_angus,red_poll,simmental,Angus	rs137833908
6	block_145_chr_6	rs29026121	rs110517212	37778924	37933250	154326	0.04626	Production	37817587	37817591	QTL_ID=67312	trait=Body_weight_(weaning)	Abbrev=WWT	breed=jersey	rs110949002
6	block_145_chr_6	rs29026121	rs110517212	37778924	37933250	154326	0.04626	Production	37817587	37817591	QTL_ID=67313	trait=Body_weight_gain	Abbrev=BWG	breed=jersey	rs136299822
6	block_145_chr_6	rs29026121	rs110517212	37778924	37933250	154326	0.04626	Production	37817587	37817591	QTL_ID=67314	trait=Body_weight_gain	Abbrev=BWG	breed=charolais,gelbvieh,hereford,limousin,pinzgauer,red_angus,red_poll,simmental,Angus	rs110185249
6	block_145_chr_6	rs29026121	rs110517212	37778924	37933250	154326	0.04626	Production	37817587	37817591	QTL_ID=67315	trait=Body_weight_gain	Abbrev=BWG	breed=charolais,gelbvieh,hereford,limousin,pinzgauer,red_angus,red_poll,simmental,Angus	rs110185249
6	block_145_chr_6	rs29026121	rs110517212	37778924	37933250	154326	0.04626	Production	37817853	37817857	QTL_ID=183751	trait=Dry_matter_intake	Abbrev=DMI	breed=charolais,gelbvieh,hereford,limousin,simmental,Angus	rs109579682
6	block_145_chr_6	rs29026121	rs110517212	37778924	37933250	154326	0.04626	Production	37817853	37817857	QTL_ID=184397	trait=Average_daily_gain	Abbrev=ADG	breed=charolais,gelbvieh,hereford,limousin,simmental,Angus	rs41983284
6	block_145_chr_6	rs29026121	rs110517212	37778924	37933250	154326	0.04626	Production	37817853	37817857	QTL_ID=187114	trait=Metabolic_body_weight	Abbrev=MBW	breed=charolais,gelbvieh,hereford,limousin,simmental,Angus	rs379762586
6	block_145_chr_6	rs29026121	rs110517212	37778924	37933250	154326	0.04626	Production	37817873	37817877	QTL_ID=183173	trait=Dry_matter_intake	Abbrev=DMI	breed=charolais,gelbvieh,hereford,limousin,simmental,Angus	rs383916341
6	block_145_chr_6	rs29026121	rs110517212	37778924	37933250	154326	0.04626	Production	37817873	37817877	QTL_ID=184475	trait=Average_daily_gain	Abbrev=ADG	breed=charolais,gelbvieh,hereford,limousin,simmental,Angus	rs136363104
6	block_145_chr_6	rs29026121	rs110517212	37778924	37933250	154326	0.04626	Production	37817873	37817877	QTL_ID=187234	trait=Metabolic_body_weight	Abbrev=MBW	breed=charolais,gelbvieh,hereford,limousin,simmental,Angus	rs211035967
6	block_145_chr_6	rs29026121	rs110517212	37778924	37933250	154326	0.04626	Production	37817908	37817912	QTL_ID=183174	trait=Dry_matter_intake	Abbrev=DMI	breed=charolais,gelbvieh,hereford,limousin,simmental,Angus	rs110720284
6	block_145_chr_6	rs29026121	rs110517212	37778924	37933250	154326	0.04626	Production	37817908	37817912	QTL_ID=184121	trait=Average_daily_gain	Abbrev=ADG	breed=charolais,gelbvieh,hereford,limousin,simmental,Angus	rs109579682
6	block_145_chr_6	rs29026121	rs110517212	37778924	37933250	154326	0.04626	Production	37817908	37817912	QTL_ID=186745	trait=Metabolic_body_weight	Abbrev=MBW	breed=charolais,gelbvieh,hereford,limousin,simmental,Angus	rs135266057
6	block_145_chr_6	rs29026121	rs110517212	37778924	37933250	154326	0.04626	Production	37818105	37818109	QTL_ID=183175	trait=Dry_matter_intake	Abbrev=DMI	breed=charolais,gelbvieh,hereford,limousin,simmental,Angus	rs133219083
6	block_145_chr_6	rs29026121	rs110517212	37778924	37933250	154326	0.04626	Production	37818105	37818109	QTL_ID=184756	trait=Average_daily_gain	Abbrev=ADG	breed=norwegian_red	rs134606859
6	block_145_chr_6	rs29026121	rs110517212	37778924	37933250	154326	0.04626	Production	37818105	37818109	QTL_ID=187666	trait=Metabolic_body_weight	Abbrev=MBW	breed=charolais,gelbvieh,hereford,limousin,simmental,Angus	rs43460025
6	block_145_chr_6	rs29026121	rs110517212	37778924	37933250	154326	0.04626	Production	37818109	37818113	QTL_ID=184383	trait=Average_daily_gain	Abbrev=ADG	breed=charolais,gelbvieh,hereford,limousin,simmental,Angus	rs381935005,rs41983284,rs382782666
6	block_145_chr_6	rs29026121	rs110517212	37778924	37933250	154326	0.04626	Production	37818109	37818113	QTL_ID=187097	trait=Metabolic_body_weight	Abbrev=MBW	breed=charolais,gelbvieh,hereford,limousin,simmental,Angus	rs378576513
6	block_145_chr_6	rs29026121	rs110517212	37778924	37933250	154326	0.04626	Production	37818193	37818197	QTL_ID=131382	trait=Metabolic_body_weight	Abbrev=MBW	breed=holstein	rs109125092
6	block_145_chr_6	rs29026121	rs110517212	37778924	37933250	154326	0.04626	Production	37818193	37818197	QTL_ID=183176	trait=Dry_matter_intake	Abbrev=DMI	breed=charolais,gelbvieh,hereford,limousin,simmental,Angus	rs137815186
6	block_145_chr_6	rs29026121	rs110517212	37778924	37933250	154326	0.04626	Production	37818193	37818197	QTL_ID=185131	trait=Average_daily_gain	Abbrev=ADG	breed=charolais,gelbvieh,hereford,limousin,simmental,Angus	rs109164431
6	block_145_chr_6	rs29026121	rs110517212	37778924	37933250	154326	0.04626	Production	37818193	37818197	QTL_ID=188240	trait=Metabolic_body_weight	Abbrev=MBW	breed=norwegian_red	rs381758503
6	block_145_chr_6	rs29026121	rs110517212	37778924	37933250	154326	0.04626	Production	37818370	37818374	QTL_ID=183177	trait=Dry_matter_intake	Abbrev=DMI	breed=charolais,gelbvieh,hereford,limousin,simmental,Angus	rs383916341
6	block_145_chr_6	rs29026121	rs110517212	37778924	37933250	154326	0.04626	Production	37818370	37818374	QTL_ID=185022	trait=Average_daily_gain	Abbrev=ADG	breed=charolais,gelbvieh,hereford,limousin,simmental,Angus	rs110927370
6	block_145_chr_6	rs29026121	rs110517212	37778924	37933250	154326	0.04626	Production	37818370	37818374	QTL_ID=188070	trait=Metabolic_body_weight	Abbrev=MBW	breed=charolais,gelbvieh,hereford,limousin,simmental,Angus	rs381559668
6	block_145_chr_6	rs29026121	rs110517212	37778924	37933250	154326	0.04626	Production	37818380	37818384	QTL_ID=185439	trait=Average_daily_gain	Abbrev=ADG	breed=charolais,gelbvieh,hereford,limousin,simmental,Angus	rs136611856
6	block_145_chr_6	rs29026121	rs110517212	37778924	37933250	154326	0.04626	Production	37818380	37818384	QTL_ID=188689	trait=Metabolic_body_weight	Abbrev=MBW	breed=charolais,gelbvieh,hereford,limousin,simmental,Angus	rs381935597
6	block_145_chr_6	rs29026121	rs110517212	37778924	37933250	154326	0.04626	Production	37818501	37818505	QTL_ID=183275	trait=Dry_matter_intake	Abbrev=DMI	breed=charolais,gelbvieh,hereford,limousin,simmental,Angus	rs29025709
6	block_145_chr_6	rs29026121	rs110517212	37778924	37933250	154326	0.04626	Production	37818501	37818505	QTL_ID=184937	trait=Average_daily_gain	Abbrev=ADG	breed=charolais,gelbvieh,hereford,limousin,simmental,Angus	rs133874113
6	block_145_chr_6	rs29026121	rs110517212	37778924	37933250	154326	0.04626	Production	37818501	37818505	QTL_ID=187943	trait=Metabolic_body_weight	Abbrev=MBW	breed=charolais,gelbvieh,hereford,limousin,simmental,Angus	rs110720284
6	block_145_chr_6	rs29026121	rs110517212	37778924	37933250	154326	0.04626	Production	37819222	37819226	QTL_ID=131383	trait=Metabolic_body_weight	Abbrev=MBW	breed=charolais,chianina,gelbvieh,hereford,holstein,limousin,piedmontese,red_angus,simmental,Angus,Maine-Anjou	rs135146886
6	block_145_chr_6	rs29026121	rs110517212	37778924	37933250	154326	0.04626	Production	37819222	37819226	QTL_ID=185301	trait=Average_daily_gain	Abbrev=ADG	breed=charolais,gelbvieh,hereford,limousin,simmental,Angus	rs109579682
6	block_145_chr_6	rs29026121	rs110517212	37778924	37933250	154326	0.04626	Production	37819222	37819226	QTL_ID=188481	trait=Metabolic_body_weight	Abbrev=MBW	breed=charolais,gelbvieh,hereford,limousin,simmental,Angus	rs384476493
6	block_145_chr_6	rs29026121	rs110517212	37778924	37933250	154326	0.04626	Production	37821521	37821525	QTL_ID=186309	trait=Average_daily_gain	Abbrev=ADG	breed=charolais,gelbvieh,hereford,limousin,simmental,Angus	rs43457947
6	block_145_chr_6	rs29026121	rs110517212	37778924	37933250	154326	0.04626	Production	37821521	37821525	QTL_ID=190234	trait=Metabolic_body_weight	Abbrev=MBW	breed=charolais,gelbvieh,hereford,limousin,simmental,Angus	rs43457988
6	block_145_chr_6	rs29026121	rs110517212	37778924	37933250	154326	0.04626	Production	37821593	37821597	QTL_ID=131384	trait=Metabolic_body_weight	Abbrev=MBW	breed=holstein	rs135587800
6	block_145_chr_6	rs29026121	rs110517212	37778924	37933250	154326	0.04626	Production	37821593	37821597	QTL_ID=186310	trait=Average_daily_gain	Abbrev=ADG	breed=charolais,gelbvieh,hereford,limousin,simmental,Angus	rs109039951
6	block_145_chr_6	rs29026121	rs110517212	37778924	37933250	154326	0.04626	Production	37821593	37821597	QTL_ID=190235	trait=Metabolic_body_weight	Abbrev=MBW	breed=charolais,gelbvieh,hereford,limousin,simmental,Angus	rs109078456
6	block_145_chr_6	rs29026121	rs110517212	37778924	37933250	154326	0.04626	Production	37821962	37821966	QTL_ID=184785	trait=Average_daily_gain	Abbrev=ADG	breed=charolais,gelbvieh,hereford,limousin,simmental,Angus	rs43457933
6	block_145_chr_6	rs29026121	rs110517212	37778924	37933250	154326	0.04626	Production	37821962	37821966	QTL_ID=187700	trait=Metabolic_body_weight	Abbrev=MBW	breed=charolais,gelbvieh,hereford,limousin,simmental,Angus	rs41595994
6	block_145_chr_6	rs29026121	rs110517212	37778924	37933250	154326	0.04626	Production	37825818	37825822	QTL_ID=184839	trait=Average_daily_gain	Abbrev=ADG	breed=charolais,gelbvieh,hereford,limousin,simmental,Angus	rs137813274
6	block_145_chr_6	rs29026121	rs110517212	37778924	37933250	154326	0.04626	Production	37825818	37825822	QTL_ID=187788	trait=Metabolic_body_weight	Abbrev=MBW	breed=charolais,gelbvieh,hereford,limousin,simmental,Angus	rs110207017
6	block_145_chr_6	rs29026121	rs110517212	37778924	37933250	154326	0.04626	Production	37825907	37825911	QTL_ID=190133	trait=Metabolic_body_weight	Abbrev=MBW	breed=charolais,gelbvieh,hereford,limousin,simmental,Angus	rs43457984
6	block_145_chr_6	rs29026121	rs110517212	37778924	37933250	154326	0.04626	Production	37826151	37826155	QTL_ID=185066	trait=Average_daily_gain	Abbrev=ADG	breed=charolais,gelbvieh,hereford,limousin,simmental,Angus	rs109039951
6	block_145_chr_6	rs29026121	rs110517212	37778924	37933250	154326	0.04626	Production	37826151	37826155	QTL_ID=188147	trait=Metabolic_body_weight	Abbrev=MBW	breed=charolais,gelbvieh,hereford,limousin,simmental,Angus	rs41651314
6	block_145_chr_6	rs29026121	rs110517212	37778924	37933250	154326	0.04626	Production	37830097	37830101	QTL_ID=185379	trait=Average_daily_gain	Abbrev=ADG	breed=charolais,gelbvieh,hereford,limousin,simmental,Angus	rs208163207
6	block_145_chr_6	rs29026121	rs110517212	37778924	37933250	154326	0.04626	Production	37830097	37830101	QTL_ID=188604	trait=Metabolic_body_weight	Abbrev=MBW	breed=charolais,gelbvieh,hereford,limousin,simmental,Angus	rs379960984
6	block_145_chr_6	rs29026121	rs110517212	37778924	37933250	154326	0.04626	Production	37831624	37831628	QTL_ID=131385	trait=Metabolic_body_weight	Abbrev=MBW	breed=holstein	rs137167583
6	block_145_chr_6	rs29026121	rs110517212	37778924	37933250	154326	0.04626	Production	37831624	37831628	QTL_ID=184754	trait=Average_daily_gain	Abbrev=ADG	breed=charolais,gelbvieh,hereford,limousin,simmental,Angus	rs211382143
6	block_145_chr_6	rs29026121	rs110517212	37778924	37933250	154326	0.04626	Production	37831624	37831628	QTL_ID=187662	trait=Metabolic_body_weight	Abbrev=MBW	breed=charolais,gelbvieh,hereford,limousin,simmental,Angus	rs378025417
6	block_145_chr_6	rs29026121	rs110517212	37778924	37933250	154326	0.04626	Production	37833437	37833441	QTL_ID=185234	trait=Average_daily_gain	Abbrev=ADG	breed=charolais,gelbvieh,hereford,limousin,simmental,Angus	rs43458016
6	block_145_chr_6	rs29026121	rs110517212	37778924	37933250	154326	0.04626	Production	37833437	37833441	QTL_ID=188394	trait=Metabolic_body_weight	Abbrev=MBW	breed=charolais,gelbvieh,hereford,limousin,simmental,Angus	rs110805476
6	block_145_chr_6	rs29026121	rs110517212	37778924	37933250	154326	0.04626	Production	37834313	37834317	QTL_ID=182557	trait=Dry_matter_intake	Abbrev=DMI	breed=charolais,gelbvieh,hereford,limousin,simmental,Angus	rs111005120
6	block_145_chr_6	rs29026121	rs110517212	37778924	37933250	154326	0.04626	Production	37834313	37834317	QTL_ID=184569	trait=Average_daily_gain	Abbrev=ADG	breed=charolais,gelbvieh,hereford,limousin,simmental,Angus	rs211355233
6	block_145_chr_6	rs29026121	rs110517212	37778924	37933250	154326	0.04626	Production	37834313	37834317	QTL_ID=187377	trait=Metabolic_body_weight	Abbrev=MBW	breed=charolais,gelbvieh,hereford,limousin,simmental,Angus	rs110746748
6	block_145_chr_6	rs29026121	rs110517212	37778924	37933250	154326	0.04626	Production	37837436	37837440	QTL_ID=186218	trait=Average_daily_gain	Abbrev=ADG	breed=charolais,gelbvieh,hereford,limousin,simmental,Angus	rs210852181
6	block_145_chr_6	rs29026121	rs110517212	37778924	37933250	154326	0.04626	Production	37837436	37837440	QTL_ID=190134	trait=Metabolic_body_weight	Abbrev=MBW	breed=charolais,gelbvieh,hereford,limousin,simmental,Angus	rs379050681
6	block_145_chr_6	rs29026121	rs110517212	37778924	37933250	154326	0.04626	Production	37837603	37837607	QTL_ID=190135	trait=Metabolic_body_weight	Abbrev=MBW	breed=charolais,gelbvieh,hereford,limousin,simmental,Angus	rs110133275
6	block_145_chr_6	rs29026121	rs110517212	37778924	37933250	154326	0.04626	Production	37837603	37837607	QTL_ID=66566	trait=Body_weight_(birth)	Abbrev=BW	breed=holstein	rs135745991
6	block_145_chr_6	rs29026121	rs110517212	37778924	37933250	154326	0.04626	Production	37837603	37837607	QTL_ID=66567	trait=Body_weight_(yearling)	Abbrev=W365	breed=holstein	rs110616484
6	block_145_chr_6	rs29026121	rs110517212	37778924	37933250	154326	0.04626	Production	37837603	37837607	QTL_ID=66568	trait=Body_weight_gain	Abbrev=BWG	breed=holstein	rs109849955
6	block_145_chr_6	rs29026121	rs110517212	37778924	37933250	154326	0.04626	Production	37837603	37837607	QTL_ID=66569	trait=Body_weight_gain	Abbrev=BWG	breed=holstein	rs110616484
6	block_145_chr_6	rs29026121	rs110517212	37778924	37933250	154326	0.04626	Production	37837603	37837607	QTL_ID=67715	trait=Body_weight_(weaning)	Abbrev=WWT	breed=holstein	rs109849955
6	block_145_chr_6	rs29026121	rs110517212	37778924	37933250	154326	0.04626	Production	37837603	37837607	QTL_ID=67716	trait=Body_weight_gain	Abbrev=BWG	breed=norwegian_red	rs110010080
6	block_145_chr_6	rs29026121	rs110517212	37778924	37933250	154326	0.04626	Production	37838620	37838624	QTL_ID=182469	trait=Dry_matter_intake	Abbrev=DMI	breed=charolais,gelbvieh,hereford,limousin,simmental,Angus	rs135330727
6	block_145_chr_6	rs29026121	rs110517212	37778924	37933250	154326	0.04626	Production	37838620	37838624	QTL_ID=185446	trait=Average_daily_gain	Abbrev=ADG	breed=charolais,gelbvieh,hereford,limousin,simmental,Angus	rs383789879
6	block_145_chr_6	rs29026121	rs110517212	37778924	37933250	154326	0.04626	Production	37838620	37838624	QTL_ID=188705	trait=Metabolic_body_weight	Abbrev=MBW	breed=charolais,gelbvieh,hereford,limousin,simmental,Angus	rs382230462
6	block_145_chr_6	rs29026121	rs110517212	37778924	37933250	154326	0.04626	Production	37842390	37842394	QTL_ID=190136	trait=Metabolic_body_weight	Abbrev=MBW	breed=charolais,gelbvieh,hereford,limousin,simmental,Angus	rs109473307
6	block_145_chr_6	rs29026121	rs110517212	37778924	37933250	154326	0.04626	Production	37861459	37861463	QTL_ID=190137	trait=Metabolic_body_weight	Abbrev=MBW	breed=charolais,gelbvieh,hereford,limousin,simmental,Angus	rs108983045
6	block_145_chr_6	rs29026121	rs110517212	37778924	37933250	154326	0.04626	Production	37875982	37875986	QTL_ID=24721	trait=Body_weight_(weaning)	Abbrev=WWT	breed=ayrshire,danish_red,Swedish_Red-and-White	rs136371364
6	block_145_chr_6	rs29026121	rs110517212	37778924	37933250	154326	0.04626	Production	37875982	37875986	QTL_ID=24788	trait=Body_weight_(yearling)	Abbrev=W365	breed=holstein	rs136371364
6	block_145_chr_6	rs29026121	rs110517212	37778924	37933250	154326	0.04626	Production	37900827	37900831	QTL_ID=190052	trait=Metabolic_body_weight	Abbrev=MBW	breed=charolais,gelbvieh,hereford,limousin,simmental,Angus	rs384797212
6	block_145_chr_6	rs29026121	rs110517212	37778924	37933250	154326	0.04626	Production	37902753	37902757	QTL_ID=182595	trait=Dry_matter_intake	Abbrev=DMI	breed=charolais,gelbvieh,hereford,limousin,simmental,Angus	rs134998281
6	block_145_chr_6	rs29026121	rs110517212	37778924	37933250	154326	0.04626	Production	37902753	37902757	QTL_ID=183983	trait=Average_daily_gain	Abbrev=ADG	breed=charolais,gelbvieh,hereford,limousin,simmental,Angus	rs109191200,rs110408618,rs135082644
6	block_145_chr_6	rs29026121	rs110517212	37778924	37933250	154326	0.04626	Production	37902753	37902757	QTL_ID=186553	trait=Metabolic_body_weight	Abbrev=MBW	breed=charolais,gelbvieh,hereford,limousin,simmental,Angus	rs137502911
6	block_145_chr_6	rs29026121	rs110517212	37778924	37933250	154326	0.04626	Production	37904996	37905000	QTL_ID=182087	trait=Dry_matter_intake	Abbrev=DMI	breed=charolais,gelbvieh,hereford,limousin,simmental,Angus	rs109434276
6	block_145_chr_6	rs29026121	rs110517212	37778924	37933250	154326	0.04626	Production	37904996	37905000	QTL_ID=186159	trait=Average_daily_gain	Abbrev=ADG	breed=charolais,gelbvieh,hereford,limousin,simmental,Angus	rs109191200,rs110408618,rs135082644
6	block_145_chr_6	rs29026121	rs110517212	37778924	37933250	154326	0.04626	Production	37904996	37905000	QTL_ID=190051	trait=Metabolic_body_weight	Abbrev=MBW	breed=charolais,gelbvieh,hereford,limousin,simmental,Angus	rs134085967
6	block_145_chr_6	rs29026121	rs110517212	37778924	37933250	154326	0.04626	Production	37905294	37905298	QTL_ID=182645	trait=Dry_matter_intake	Abbrev=DMI	breed=charolais,gelbvieh,hereford,limousin,simmental,Angus	rs135846454
6	block_145_chr_6	rs29026121	rs110517212	37778924	37933250	154326	0.04626	Production	37905294	37905298	QTL_ID=184551	trait=Average_daily_gain	Abbrev=ADG	breed=charolais,gelbvieh,hereford,limousin,simmental,Angus	rs133109749
6	block_145_chr_6	rs29026121	rs110517212	37778924	37933250	154326	0.04626	Production	37905294	37905298	QTL_ID=187351	trait=Metabolic_body_weight	Abbrev=MBW	breed=charolais,gelbvieh,hereford,limousin,simmental,Angus	rs109279094
6	block_145_chr_6	rs29026121	rs110517212	37778924	37933250	154326	0.04626	Production	37905465	37905469	QTL_ID=182602	trait=Dry_matter_intake	Abbrev=DMI	breed=charolais,gelbvieh,hereford,limousin,simmental,Angus	rs108967640
6	block_145_chr_6	rs29026121	rs110517212	37778924	37933250	154326	0.04626	Production	37905465	37905469	QTL_ID=185051	trait=Average_daily_gain	Abbrev=ADG	breed=charolais,gelbvieh,hereford,limousin,simmental,Angus	rs109191200,rs110408618,rs135082644
6	block_145_chr_6	rs29026121	rs110517212	37778924	37933250	154326	0.04626	Production	37905465	37905469	QTL_ID=188112	trait=Metabolic_body_weight	Abbrev=MBW	breed=charolais,gelbvieh,hereford,limousin,simmental,Angus	rs109279094
6	block_145_chr_6	rs29026121	rs110517212	37778924	37933250	154326	0.04626	Production	37907355	37907359	QTL_ID=182619	trait=Dry_matter_intake	Abbrev=DMI	breed=charolais,gelbvieh,hereford,limousin,simmental,Angus	rs108967640
6	block_145_chr_6	rs29026121	rs110517212	37778924	37933250	154326	0.04626	Production	37907355	37907359	QTL_ID=185210	trait=Average_daily_gain	Abbrev=ADG	breed=charolais,gelbvieh,hereford,limousin,simmental,Angus	rs109191200,rs110408618,rs135082644
6	block_145_chr_6	rs29026121	rs110517212	37778924	37933250	154326	0.04626	Production	37907355	37907359	QTL_ID=188354	trait=Metabolic_body_weight	Abbrev=MBW	breed=charolais,gelbvieh,hereford,limousin,simmental,Angus	rs109279094
6	block_145_chr_6	rs29026121	rs110517212	37778924	37933250	154326	0.04626	Production	37908476	37908480	QTL_ID=164082	trait=Body_weight_(birth)	Abbrev=BW	breed=holstein	rs41651316
6	block_145_chr_6	rs29026121	rs110517212	37778924	37933250	154326	0.04626	Production	37908476	37908480	QTL_ID=164125	trait=Body_weight_(weaning)	Abbrev=WWT	breed=holstein	rs379061965
6	block_145_chr_6	rs29026121	rs110517212	37778924	37933250	154326	0.04626	Production	37908476	37908480	QTL_ID=164134	trait=Average_daily_gain	Abbrev=ADG	breed=holstein	rs43002212
6	block_145_chr_6	rs29026121	rs110517212	37778924	37933250	154326	0.04626	Production	37908476	37908480	QTL_ID=164148	trait=Average_daily_gain	Abbrev=ADG	breed=holstein	rs29017713
6	block_145_chr_6	rs29026121	rs110517212	37778924	37933250	154326	0.04626	Production	37908476	37908480	QTL_ID=164181	trait=Body_weight_(yearling)	Abbrev=W365	breed=norwegian_red	rs109139796
6	block_145_chr_6	rs29026121	rs110517212	37778924	37933250	154326	0.04626	Production	37908476	37908480	QTL_ID=164383	trait=Body_weight_(birth)	Abbrev=BW	breed=charolais,gelbvieh,hereford,limousin,simmental,Angus	rs109550729
6	block_145_chr_6	rs29026121	rs110517212	37778924	37933250	154326	0.04626	Production	37908476	37908480	QTL_ID=164455	trait=Average_daily_gain	Abbrev=ADG	breed=charolais,gelbvieh,hereford,limousin,simmental,Angus	rs109550729
6	block_145_chr_6	rs29026121	rs110517212	37778924	37933250	154326	0.04626	Production	37908476	37908480	QTL_ID=164501	trait=Body_weight_(yearling)	Abbrev=W365	breed=charolais,gelbvieh,hereford,limousin,simmental,Angus	rs109550729
6	block_145_chr_6	rs29026121	rs110517212	37778924	37933250	154326	0.04626	Production	37908476	37908480	QTL_ID=182608	trait=Dry_matter_intake	Abbrev=DMI	breed=charolais,gelbvieh,hereford,limousin,simmental,Angus	rs108967640
6	block_145_chr_6	rs29026121	rs110517212	37778924	37933250	154326	0.04626	Production	37908476	37908480	QTL_ID=184365	trait=Average_daily_gain	Abbrev=ADG	breed=charolais,gelbvieh,hereford,limousin,simmental,Angus	rs135638362
6	block_145_chr_6	rs29026121	rs110517212	37778924	37933250	154326	0.04626	Production	37908476	37908480	QTL_ID=187065	trait=Metabolic_body_weight	Abbrev=MBW	breed=charolais,gelbvieh,hereford,limousin,simmental,Angus	rs134334613
6	block_145_chr_6	rs29026121	rs110517212	37778924	37933250	154326	0.04626	Production	37908476	37908480	QTL_ID=23729	trait=Body_weight_(birth)	Abbrev=BW	breed=holstein	rs133242881
6	block_145_chr_6	rs29026121	rs110517212	37778924	37933250	154326	0.04626	Production	37908505	37908509	QTL_ID=182594	trait=Dry_matter_intake	Abbrev=DMI	breed=charolais,gelbvieh,hereford,limousin,simmental,Angus	rs109605668
6	block_145_chr_6	rs29026121	rs110517212	37778924	37933250	154326	0.04626	Production	37908505	37908509	QTL_ID=184022	trait=Average_daily_gain	Abbrev=ADG	breed=charolais,gelbvieh,hereford,limousin,simmental,Angus	rs109191200,rs110408618,rs135082644
6	block_145_chr_6	rs29026121	rs110517212	37778924	37933250	154326	0.04626	Production	37908505	37908509	QTL_ID=186610	trait=Metabolic_body_weight	Abbrev=MBW	breed=charolais,gelbvieh,hereford,limousin,simmental,Angus	rs135981428
6	block_145_chr_6	rs29026121	rs110517212	37778924	37933250	154326	0.04626	Production	37908677	37908681	QTL_ID=182102	trait=Dry_matter_intake	Abbrev=DMI	breed=charolais,gelbvieh,hereford,limousin,simmental,Angus	rs109345746
6	block_145_chr_6	rs29026121	rs110517212	37778924	37933250	154326	0.04626	Production	37908677	37908681	QTL_ID=186158	trait=Average_daily_gain	Abbrev=ADG	breed=charolais,gelbvieh,hereford,limousin,simmental,Angus	rs109191200,rs110408618,rs135082644
6	block_145_chr_6	rs29026121	rs110517212	37778924	37933250	154326	0.04626	Production	37908677	37908681	QTL_ID=190050	trait=Metabolic_body_weight	Abbrev=MBW	breed=charolais,gelbvieh,hereford,limousin,simmental,Angus	rs136842171
6	block_145_chr_6	rs29026121	rs110517212	37778924	37933250	154326	0.04626	Production	37908859	37908863	QTL_ID=182196	trait=Dry_matter_intake	Abbrev=DMI	breed=charolais,gelbvieh,hereford,limousin,simmental,Angus	rs43457937
6	block_145_chr_6	rs29026121	rs110517212	37778924	37933250	154326	0.04626	Production	37908859	37908863	QTL_ID=186157	trait=Average_daily_gain	Abbrev=ADG	breed=charolais,gelbvieh,hereford,limousin,simmental,Angus	rs109191200,rs110408618,rs135082644
6	block_145_chr_6	rs29026121	rs110517212	37778924	37933250	154326	0.04626	Production	37908859	37908863	QTL_ID=190049	trait=Metabolic_body_weight	Abbrev=MBW	breed=charolais,gelbvieh,hereford,limousin,simmental,Angus	rs110168514
6	block_145_chr_6	rs29026121	rs110517212	37778924	37933250	154326	0.04626	Production	37908960	37908964	QTL_ID=182236	trait=Dry_matter_intake	Abbrev=DMI	breed=charolais,gelbvieh,hereford,limousin,simmental,Angus	rs43457937
6	block_145_chr_6	rs29026121	rs110517212	37778924	37933250	154326	0.04626	Production	37908960	37908964	QTL_ID=186156	trait=Average_daily_gain	Abbrev=ADG	breed=charolais,gelbvieh,hereford,limousin,simmental,Angus	rs109191200,rs110408618,rs135082644
6	block_145_chr_6	rs29026121	rs110517212	37778924	37933250	154326	0.04626	Production	37908960	37908964	QTL_ID=190048	trait=Metabolic_body_weight	Abbrev=MBW	breed=charolais,gelbvieh,hereford,limousin,simmental,Angus	rs110043972
6	block_145_chr_6	rs29026121	rs110517212	37778924	37933250	154326	0.04626	Production	37909141	37909145	QTL_ID=182466	trait=Dry_matter_intake	Abbrev=DMI	breed=charolais,gelbvieh,hereford,limousin,simmental,Angus	rs109605668
6	block_145_chr_6	rs29026121	rs110517212	37778924	37933250	154326	0.04626	Production	37909141	37909145	QTL_ID=186155	trait=Average_daily_gain	Abbrev=ADG	breed=charolais,gelbvieh,hereford,limousin,simmental,Angus	rs109191200,rs110408618,rs135082644
6	block_145_chr_6	rs29026121	rs110517212	37778924	37933250	154326	0.04626	Production	37909141	37909145	QTL_ID=190047	trait=Metabolic_body_weight	Abbrev=MBW	breed=charolais,gelbvieh,hereford,limousin,simmental,Angus	rs109979076
6	block_145_chr_6	rs29026121	rs110517212	37778924	37933250	154326	0.04626	Production	37910274	37910278	QTL_ID=182179	trait=Dry_matter_intake	Abbrev=DMI	breed=charolais,gelbvieh,hereford,limousin,simmental,Angus	rs137182248
6	block_145_chr_6	rs29026121	rs110517212	37778924	37933250	154326	0.04626	Production	37910274	37910278	QTL_ID=186154	trait=Average_daily_gain	Abbrev=ADG	breed=charolais,gelbvieh,hereford,limousin,simmental,Angus	rs109191200,rs110408618,rs135082644
6	block_145_chr_6	rs29026121	rs110517212	37778924	37933250	154326	0.04626	Production	37910274	37910278	QTL_ID=190046	trait=Metabolic_body_weight	Abbrev=MBW	breed=charolais,gelbvieh,hereford,limousin,simmental,Angus	rs109661142
6	block_145_chr_6	rs29026121	rs110517212	37778924	37933250	154326	0.04626	Production	37910462	37910466	QTL_ID=182634	trait=Dry_matter_intake	Abbrev=DMI	breed=charolais,gelbvieh,hereford,limousin,simmental,Angus	rs110596001
6	block_145_chr_6	rs29026121	rs110517212	37778924	37933250	154326	0.04626	Production	37910462	37910466	QTL_ID=186153	trait=Average_daily_gain	Abbrev=ADG	breed=charolais,gelbvieh,hereford,limousin,simmental,Angus	rs43458005,rs110939004
6	block_145_chr_6	rs29026121	rs110517212	37778924	37933250	154326	0.04626	Production	37910462	37910466	QTL_ID=190045	trait=Metabolic_body_weight	Abbrev=MBW	breed=charolais,gelbvieh,hereford,limousin,simmental,Angus	rs41621082
6	block_145_chr_6	rs29026121	rs110517212	37778924	37933250	154326	0.04626	Production	37910476	37910480	QTL_ID=182635	trait=Dry_matter_intake	Abbrev=DMI	breed=charolais,gelbvieh,hereford,limousin,simmental,Angus	rs108989350
6	block_145_chr_6	rs29026121	rs110517212	37778924	37933250	154326	0.04626	Production	37910476	37910480	QTL_ID=186152	trait=Average_daily_gain	Abbrev=ADG	breed=charolais,gelbvieh,hereford,limousin,simmental,Angus	rs109780342
6	block_145_chr_6	rs29026121	rs110517212	37778924	37933250	154326	0.04626	Production	37910476	37910480	QTL_ID=190044	trait=Metabolic_body_weight	Abbrev=MBW	breed=charolais,gelbvieh,hereford,limousin,simmental,Angus	rs41621081
6	block_145_chr_6	rs29026121	rs110517212	37778924	37933250	154326	0.04626	Production	37910864	37910868	QTL_ID=182399	trait=Dry_matter_intake	Abbrev=DMI	breed=charolais,gelbvieh,hereford,limousin,simmental,Angus	rs109296603
6	block_145_chr_6	rs29026121	rs110517212	37778924	37933250	154326	0.04626	Production	37910864	37910868	QTL_ID=186151	trait=Average_daily_gain	Abbrev=ADG	breed=charolais,gelbvieh,hereford,limousin,simmental,Angus	rs109020535
6	block_145_chr_6	rs29026121	rs110517212	37778924	37933250	154326	0.04626	Production	37910864	37910868	QTL_ID=190043	trait=Metabolic_body_weight	Abbrev=MBW	breed=charolais,gelbvieh,hereford,limousin,simmental,Angus	rs134864359
6	block_145_chr_6	rs29026121	rs110517212	37778924	37933250	154326	0.04626	Production	37911812	37911816	QTL_ID=182487	trait=Dry_matter_intake	Abbrev=DMI	breed=charolais,gelbvieh,hereford,limousin,simmental,Angus	rs110278830
6	block_145_chr_6	rs29026121	rs110517212	37778924	37933250	154326	0.04626	Production	37911812	37911816	QTL_ID=186150	trait=Average_daily_gain	Abbrev=ADG	breed=charolais,gelbvieh,hereford,limousin,simmental,Angus	rs137437694
6	block_145_chr_6	rs29026121	rs110517212	37778924	37933250	154326	0.04626	Production	37911812	37911816	QTL_ID=190042	trait=Metabolic_body_weight	Abbrev=MBW	breed=charolais,gelbvieh,hereford,limousin,simmental,Angus	rs132741344
6	block_145_chr_6	rs29026121	rs110517212	37778924	37933250	154326	0.04626	Production	37912114	37912118	QTL_ID=182383	trait=Dry_matter_intake	Abbrev=DMI	breed=charolais,gelbvieh,hereford,limousin,simmental,Angus	rs109495237
6	block_145_chr_6	rs29026121	rs110517212	37778924	37933250	154326	0.04626	Production	37912114	37912118	QTL_ID=186149	trait=Average_daily_gain	Abbrev=ADG	breed=charolais,gelbvieh,hereford,limousin,simmental,Angus	rs109020535
6	block_145_chr_6	rs29026121	rs110517212	37778924	37933250	154326	0.04626	Production	37912114	37912118	QTL_ID=190041	trait=Metabolic_body_weight	Abbrev=MBW	breed=charolais,gelbvieh,hereford,limousin,simmental,Angus	rs110435228
6	block_145_chr_6	rs29026121	rs110517212	37778924	37933250	154326	0.04626	Production	37913123	37913127	QTL_ID=184145	trait=Average_daily_gain	Abbrev=ADG	breed=charolais,gelbvieh,hereford,limousin,simmental,Angus	rs41567028
6	block_145_chr_6	rs29026121	rs110517212	37778924	37933250	154326	0.04626	Production	37913650	37913654	QTL_ID=182216	trait=Dry_matter_intake	Abbrev=DMI	breed=charolais,gelbvieh,hereford,limousin,simmental,Angus	rs135579545
6	block_145_chr_6	rs29026121	rs110517212	37778924	37933250	154326	0.04626	Production	37913650	37913654	QTL_ID=186148	trait=Average_daily_gain	Abbrev=ADG	breed=charolais,gelbvieh,hereford,limousin,simmental,Angus	rs137437694
6	block_145_chr_6	rs29026121	rs110517212	37778924	37933250	154326	0.04626	Production	37913650	37913654	QTL_ID=190040	trait=Metabolic_body_weight	Abbrev=MBW	breed=charolais,gelbvieh,hereford,limousin,simmental,Angus	rs133669403
6	block_145_chr_6	rs29026121	rs110517212	37778924	37933250	154326	0.04626	Production	37913725	37913729	QTL_ID=182182	trait=Dry_matter_intake	Abbrev=DMI	breed=charolais,gelbvieh,hereford,limousin,simmental,Angus	rs134133374
6	block_145_chr_6	rs29026121	rs110517212	37778924	37933250	154326	0.04626	Production	37913725	37913729	QTL_ID=186147	trait=Average_daily_gain	Abbrev=ADG	breed=charolais,gelbvieh,hereford,limousin,simmental,Angus	rs109020535
6	block_145_chr_6	rs29026121	rs110517212	37778924	37933250	154326	0.04626	Production	37913725	37913729	QTL_ID=190039	trait=Metabolic_body_weight	Abbrev=MBW	breed=charolais,gelbvieh,hereford,limousin,simmental,Angus	rs133669403
6	block_145_chr_6	rs29026121	rs110517212	37778924	37933250	154326	0.04626	Production	37913920	37913924	QTL_ID=182210	trait=Dry_matter_intake	Abbrev=DMI	breed=charolais,gelbvieh,hereford,limousin,simmental,Angus	rs110282584
6	block_145_chr_6	rs29026121	rs110517212	37778924	37933250	154326	0.04626	Production	37913920	37913924	QTL_ID=184775	trait=Average_daily_gain	Abbrev=ADG	breed=charolais,gelbvieh,hereford,limousin,simmental,Angus	rs110057198
6	block_145_chr_6	rs29026121	rs110517212	37778924	37933250	154326	0.04626	Production	37913920	37913924	QTL_ID=187690	trait=Metabolic_body_weight	Abbrev=MBW	breed=charolais,gelbvieh,hereford,limousin,simmental,Angus	rs109106016
6	block_145_chr_6	rs29026121	rs110517212	37778924	37933250	154326	0.04626	Production	37913938	37913942	QTL_ID=182189	trait=Dry_matter_intake	Abbrev=DMI	breed=charolais,gelbvieh,hereford,limousin,simmental,Angus	rs109233674
6	block_145_chr_6	rs29026121	rs110517212	37778924	37933250	154326	0.04626	Production	37913938	37913942	QTL_ID=186146	trait=Average_daily_gain	Abbrev=ADG	breed=charolais,gelbvieh,hereford,limousin,simmental,Angus	rs137437694
6	block_145_chr_6	rs29026121	rs110517212	37778924	37933250	154326	0.04626	Production	37913938	37913942	QTL_ID=190038	trait=Metabolic_body_weight	Abbrev=MBW	breed=charolais,gelbvieh,hereford,limousin,simmental,Angus	rs109435799
6	block_145_chr_6	rs29026121	rs110517212	37778924	37933250	154326	0.04626	Production	37914437	37914441	QTL_ID=182131	trait=Dry_matter_intake	Abbrev=DMI	breed=charolais,gelbvieh,hereford,limousin,simmental,Angus	rs110733805
6	block_145_chr_6	rs29026121	rs110517212	37778924	37933250	154326	0.04626	Production	37914437	37914441	QTL_ID=186145	trait=Average_daily_gain	Abbrev=ADG	breed=charolais,gelbvieh,hereford,limousin,simmental,Angus	rs452022110,rs443088095,rs381459681
6	block_145_chr_6	rs29026121	rs110517212	37778924	37933250	154326	0.04626	Production	37914437	37914441	QTL_ID=190037	trait=Metabolic_body_weight	Abbrev=MBW	breed=charolais,gelbvieh,hereford,limousin,simmental,Angus	rs207937185
6	block_145_chr_6	rs29026121	rs110517212	37778924	37933250	154326	0.04626	Production	37914511	37914515	QTL_ID=182193	trait=Dry_matter_intake	Abbrev=DMI	breed=charolais,gelbvieh,hereford,limousin,simmental,Angus	rs110253547
6	block_145_chr_6	rs29026121	rs110517212	37778924	37933250	154326	0.04626	Production	37914511	37914515	QTL_ID=186144	trait=Average_daily_gain	Abbrev=ADG	breed=charolais,gelbvieh,hereford,limousin,simmental,Angus	rs110788187
6	block_145_chr_6	rs29026121	rs110517212	37778924	37933250	154326	0.04626	Production	37914511	37914515	QTL_ID=190036	trait=Metabolic_body_weight	Abbrev=MBW	breed=charolais,gelbvieh,hereford,limousin,simmental,Angus	rs109163366
6	block_145_chr_6	rs29026121	rs110517212	37778924	37933250	154326	0.04626	Production	37914728	37914732	QTL_ID=182162	trait=Dry_matter_intake	Abbrev=DMI	breed=charolais,gelbvieh,hereford,limousin,simmental,Angus	rs41257255
6	block_145_chr_6	rs29026121	rs110517212	37778924	37933250	154326	0.04626	Production	37914728	37914732	QTL_ID=186143	trait=Average_daily_gain	Abbrev=ADG	breed=charolais,gelbvieh,hereford,limousin,simmental,Angus	rs110788187
6	block_145_chr_6	rs29026121	rs110517212	37778924	37933250	154326	0.04626	Production	37914728	37914732	QTL_ID=190035	trait=Metabolic_body_weight	Abbrev=MBW	breed=charolais,gelbvieh,hereford,limousin,simmental,Angus	rs29025709
6	block_145_chr_6	rs29026121	rs110517212	37778924	37933250	154326	0.04626	Production	37914814	37914818	QTL_ID=182156	trait=Dry_matter_intake	Abbrev=DMI	breed=charolais,gelbvieh,hereford,limousin,simmental,Angus	rs135724312
6	block_145_chr_6	rs29026121	rs110517212	37778924	37933250	154326	0.04626	Production	37914814	37914818	QTL_ID=186142	trait=Average_daily_gain	Abbrev=ADG	breed=charolais,gelbvieh,hereford,limousin,simmental,Angus	rs110788187
6	block_145_chr_6	rs29026121	rs110517212	37778924	37933250	154326	0.04626	Production	37914814	37914818	QTL_ID=190034	trait=Metabolic_body_weight	Abbrev=MBW	breed=charolais,gelbvieh,hereford,limousin,simmental,Angus	rs29025709
6	block_145_chr_6	rs29026121	rs110517212	37778924	37933250	154326	0.04626	Production	37914820	37914824	QTL_ID=182126	trait=Dry_matter_intake	Abbrev=DMI	breed=charolais,gelbvieh,hereford,limousin,simmental,Angus	rs135817111
6	block_145_chr_6	rs29026121	rs110517212	37778924	37933250	154326	0.04626	Production	37914820	37914824	QTL_ID=186141	trait=Average_daily_gain	Abbrev=ADG	breed=charolais,gelbvieh,hereford,limousin,simmental,Angus	rs110829720
6	block_145_chr_6	rs29026121	rs110517212	37778924	37933250	154326	0.04626	Production	37914820	37914824	QTL_ID=190033	trait=Metabolic_body_weight	Abbrev=MBW	breed=charolais,gelbvieh,hereford,limousin,simmental,Angus	rs29025709
6	block_145_chr_6	rs29026121	rs110517212	37778924	37933250	154326	0.04626	Production	37914830	37914834	QTL_ID=182174	trait=Dry_matter_intake	Abbrev=DMI	breed=charolais,gelbvieh,hereford,limousin,simmental,Angus	rs136655847
6	block_145_chr_6	rs29026121	rs110517212	37778924	37933250	154326	0.04626	Production	37914830	37914834	QTL_ID=186140	trait=Average_daily_gain	Abbrev=ADG	breed=charolais,gelbvieh,hereford,limousin,simmental,Angus	rs110829720
6	block_145_chr_6	rs29026121	rs110517212	37778924	37933250	154326	0.04626	Production	37914830	37914834	QTL_ID=190032	trait=Metabolic_body_weight	Abbrev=MBW	breed=charolais,gelbvieh,hereford,limousin,simmental,Angus	rs29025709
6	block_145_chr_6	rs29026121	rs110517212	37778924	37933250	154326	0.04626	Production	37915306	37915310	QTL_ID=182150	trait=Dry_matter_intake	Abbrev=DMI	breed=charolais,gelbvieh,hereford,limousin,simmental,Angus	rs133908481
6	block_145_chr_6	rs29026121	rs110517212	37778924	37933250	154326	0.04626	Production	37915306	37915310	QTL_ID=186138	trait=Average_daily_gain	Abbrev=ADG	breed=charolais,gelbvieh,hereford,limousin,simmental,Angus	rs110829720
6	block_145_chr_6	rs29026121	rs110517212	37778924	37933250	154326	0.04626	Production	37915306	37915310	QTL_ID=190030	trait=Metabolic_body_weight	Abbrev=MBW	breed=charolais,gelbvieh,hereford,limousin,simmental,Angus	rs29025709
6	block_145_chr_6	rs29026121	rs110517212	37778924	37933250	154326	0.04626	Production	37916174	37916178	QTL_ID=182062	trait=Dry_matter_intake	Abbrev=DMI	breed=charolais,gelbvieh,hereford,limousin,simmental,Angus	rs135604645
6	block_145_chr_6	rs29026121	rs110517212	37778924	37933250	154326	0.04626	Production	37916174	37916178	QTL_ID=184694	trait=Average_daily_gain	Abbrev=ADG	breed=charolais,gelbvieh,hereford,limousin,simmental,Angus	rs110057198
6	block_145_chr_6	rs29026121	rs110517212	37778924	37933250	154326	0.04626	Production	37916174	37916178	QTL_ID=187555	trait=Metabolic_body_weight	Abbrev=MBW	breed=charolais,gelbvieh,hereford,limousin,simmental,Angus	rs109279094
6	block_145_chr_6	rs29026121	rs110517212	37778924	37933250	154326	0.04626	Production	37916417	37916421	QTL_ID=187292	trait=Metabolic_body_weight	Abbrev=MBW	breed=charolais,gelbvieh,hereford,limousin,simmental,Angus	rs109555147
6	block_145_chr_6	rs29026121	rs110517212	37778924	37933250	154326	0.04626	Production	37917364	37917368	QTL_ID=182038	trait=Dry_matter_intake	Abbrev=DMI	breed=charolais,gelbvieh,hereford,limousin,simmental,Angus	rs109659817
6	block_145_chr_6	rs29026121	rs110517212	37778924	37933250	154326	0.04626	Production	37917364	37917368	QTL_ID=185726	trait=Average_daily_gain	Abbrev=ADG	breed=charolais,gelbvieh,hereford,limousin,simmental,Angus	rs133782327
6	block_145_chr_6	rs29026121	rs110517212	37778924	37933250	154326	0.04626	Production	37917364	37917368	QTL_ID=189254	trait=Metabolic_body_weight	Abbrev=MBW	breed=charolais,gelbvieh,hereford,limousin,simmental,Angus	rs137641775
6	block_145_chr_6	rs29026121	rs110517212	37778924	37933250	154326	0.04626	Production	37917419	37917423	QTL_ID=182072	trait=Dry_matter_intake	Abbrev=DMI	breed=charolais,gelbvieh,hereford,limousin,simmental,Angus	rs133070251
6	block_145_chr_6	rs29026121	rs110517212	37778924	37933250	154326	0.04626	Production	37917419	37917423	QTL_ID=184239	trait=Average_daily_gain	Abbrev=ADG	breed=charolais,gelbvieh,hereford,limousin,simmental,Angus	rs110908461
6	block_145_chr_6	rs29026121	rs110517212	37778924	37933250	154326	0.04626	Production	37917419	37917423	QTL_ID=186910	trait=Metabolic_body_weight	Abbrev=MBW	breed=charolais,gelbvieh,hereford,limousin,pinzgauer,red_angus,red_poll,simmental,Angus	rs110004749
6	block_145_chr_6	rs29026121	rs110517212	37778924	37933250	154326	0.04626	Production	37917794	37917798	QTL_ID=182077	trait=Dry_matter_intake	Abbrev=DMI	breed=charolais,gelbvieh,hereford,limousin,simmental,Angus	rs110919938
6	block_145_chr_6	rs29026121	rs110517212	37778924	37933250	154326	0.04626	Production	37917794	37917798	QTL_ID=184017	trait=Average_daily_gain	Abbrev=ADG	breed=charolais,gelbvieh,hereford,limousin,simmental,Angus	rs41567028
6	block_145_chr_6	rs29026121	rs110517212	37778924	37933250	154326	0.04626	Production	37917794	37917798	QTL_ID=186603	trait=Metabolic_body_weight	Abbrev=MBW	breed=charolais,gelbvieh,hereford,limousin,simmental,Angus	rs467849677
6	block_145_chr_6	rs29026121	rs110517212	37778924	37933250	154326	0.04626	Production	37918294	37918298	QTL_ID=182070	trait=Dry_matter_intake	Abbrev=DMI	breed=charolais,gelbvieh,hereford,limousin,simmental,Angus	rs136764992
6	block_145_chr_6	rs29026121	rs110517212	37778924	37933250	154326	0.04626	Production	37918294	37918298	QTL_ID=184662	trait=Average_daily_gain	Abbrev=ADG	breed=charolais,gelbvieh,hereford,limousin,simmental,Angus	rs110057198
6	block_145_chr_6	rs29026121	rs110517212	37778924	37933250	154326	0.04626	Production	37918294	37918298	QTL_ID=187519	trait=Metabolic_body_weight	Abbrev=MBW	breed=charolais,gelbvieh,hereford,limousin,simmental,Angus	rs135118455
6	block_145_chr_6	rs29026121	rs110517212	37778924	37933250	154326	0.04626	Production	37918544	37918548	QTL_ID=187309	trait=Metabolic_body_weight	Abbrev=MBW	breed=charolais,gelbvieh,hereford,limousin,simmental,Angus	rs109865366
6	block_145_chr_6	rs29026121	rs110517212	37778924	37933250	154326	0.04626	Production	37918822	37918826	QTL_ID=182086	trait=Dry_matter_intake	Abbrev=DMI	breed=charolais,gelbvieh,hereford,limousin,simmental,Angus	rs110865045
6	block_145_chr_6	rs29026121	rs110517212	37778924	37933250	154326	0.04626	Production	37918822	37918826	QTL_ID=184531	trait=Average_daily_gain	Abbrev=ADG	breed=charolais,gelbvieh,hereford,limousin,simmental,Angus	rs110057198
6	block_145_chr_6	rs29026121	rs110517212	37778924	37933250	154326	0.04626	Production	37918822	37918826	QTL_ID=187321	trait=Metabolic_body_weight	Abbrev=MBW	breed=charolais,gelbvieh,hereford,limousin,simmental,Angus	rs110550021
6	block_145_chr_6	rs29026121	rs110517212	37778924	37933250	154326	0.04626	Production	37919043	37919047	QTL_ID=182076	trait=Dry_matter_intake	Abbrev=DMI	breed=charolais,gelbvieh,hereford,limousin,simmental,Angus	rs136063910
6	block_145_chr_6	rs29026121	rs110517212	37778924	37933250	154326	0.04626	Production	37919043	37919047	QTL_ID=184330	trait=Average_daily_gain	Abbrev=ADG	breed=charolais,gelbvieh,hereford,limousin,simmental,Angus	rs473169717
6	block_145_chr_6	rs29026121	rs110517212	37778924	37933250	154326	0.04626	Production	37919043	37919047	QTL_ID=187021	trait=Metabolic_body_weight	Abbrev=MBW	breed=charolais,gelbvieh,hereford,limousin,simmental,Angus	rs136395713
6	block_145_chr_6	rs29026121	rs110517212	37778924	37933250	154326	0.04626	Production	37919093	37919097	QTL_ID=182081	trait=Dry_matter_intake	Abbrev=DMI	breed=charolais,gelbvieh,hereford,limousin,simmental,Angus	rs135994678
6	block_145_chr_6	rs29026121	rs110517212	37778924	37933250	154326	0.04626	Production	37919093	37919097	QTL_ID=184796	trait=Average_daily_gain	Abbrev=ADG	breed=charolais,gelbvieh,hereford,limousin,simmental,Angus	rs110057198
6	block_145_chr_6	rs29026121	rs110517212	37778924	37933250	154326	0.04626	Production	37919093	37919097	QTL_ID=187720	trait=Metabolic_body_weight	Abbrev=MBW	breed=charolais,gelbvieh,hereford,limousin,simmental,Angus	rs109374906
6	block_145_chr_6	rs29026121	rs110517212	37778924	37933250	154326	0.04626	Production	37919118	37919122	QTL_ID=182075	trait=Dry_matter_intake	Abbrev=DMI	breed=charolais,gelbvieh,hereford,limousin,simmental,Angus	rs109370642
6	block_145_chr_6	rs29026121	rs110517212	37778924	37933250	154326	0.04626	Production	37919118	37919122	QTL_ID=184715	trait=Average_daily_gain	Abbrev=ADG	breed=charolais,gelbvieh,hereford,limousin,simmental,Angus	rs110057198
6	block_145_chr_6	rs29026121	rs110517212	37778924	37933250	154326	0.04626	Production	37919118	37919122	QTL_ID=187592	trait=Metabolic_body_weight	Abbrev=MBW	breed=charolais,gelbvieh,hereford,limousin,simmental,Angus	rs110716794
6	block_145_chr_6	rs29026121	rs110517212	37778924	37933250	154326	0.04626	Production	37919518	37919522	QTL_ID=182037	trait=Dry_matter_intake	Abbrev=DMI	breed=charolais,gelbvieh,hereford,limousin,simmental,Angus	rs110182599
6	block_145_chr_6	rs29026121	rs110517212	37778924	37933250	154326	0.04626	Production	37919518	37919522	QTL_ID=184320	trait=Average_daily_gain	Abbrev=ADG	breed=charolais,gelbvieh,hereford,limousin,simmental,Angus	rs110908461
6	block_145_chr_6	rs29026121	rs110517212	37778924	37933250	154326	0.04626	Production	37919518	37919522	QTL_ID=187005	trait=Metabolic_body_weight	Abbrev=MBW	breed=charolais,gelbvieh,hereford,limousin,simmental,Angus	rs133697273
6	block_145_chr_6	rs29026121	rs110517212	37778924	37933250	154326	0.04626	Production	37919629	37919633	QTL_ID=182080	trait=Dry_matter_intake	Abbrev=DMI	breed=charolais,gelbvieh,hereford,limousin,simmental,Angus	rs109620302
6	block_145_chr_6	rs29026121	rs110517212	37778924	37933250	154326	0.04626	Production	37919629	37919633	QTL_ID=183972	trait=Average_daily_gain	Abbrev=ADG	breed=charolais,gelbvieh,hereford,limousin,simmental,Angus	rs41567028
6	block_145_chr_6	rs29026121	rs110517212	37778924	37933250	154326	0.04626	Production	37919629	37919633	QTL_ID=186541	trait=Metabolic_body_weight	Abbrev=MBW	breed=charolais,gelbvieh,hereford,limousin,simmental,Angus	rs42611265
6	block_145_chr_6	rs29026121	rs110517212	37778924	37933250	154326	0.04626	Production	37919659	37919663	QTL_ID=188720	trait=Metabolic_body_weight	Abbrev=MBW	breed=charolais,gelbvieh,hereford,limousin,simmental,Angus	rs137644845
6	block_145_chr_6	rs29026121	rs110517212	37778924	37933250	154326	0.04626	Production	37919851	37919855	QTL_ID=182024	trait=Dry_matter_intake	Abbrev=DMI	breed=charolais,gelbvieh,hereford,limousin,simmental,Angus	rs41652042
6	block_145_chr_6	rs29026121	rs110517212	37778924	37933250	154326	0.04626	Production	37919851	37919855	QTL_ID=185468	trait=Average_daily_gain	Abbrev=ADG	breed=charolais,gelbvieh,hereford,limousin,simmental,Angus	rs134663272
6	block_145_chr_6	rs29026121	rs110517212	37778924	37933250	154326	0.04626	Production	37919851	37919855	QTL_ID=188744	trait=Metabolic_body_weight	Abbrev=MBW	breed=charolais,gelbvieh,hereford,limousin,simmental,Angus	rs109134234
6	block_145_chr_6	rs29026121	rs110517212	37778924	37933250	154326	0.04626	Production	37919860	37919864	QTL_ID=182082	trait=Dry_matter_intake	Abbrev=DMI	breed=charolais,gelbvieh,hereford,limousin,simmental,Angus	rs41257255
6	block_145_chr_6	rs29026121	rs110517212	37778924	37933250	154326	0.04626	Production	37919860	37919864	QTL_ID=183942	trait=Average_daily_gain	Abbrev=ADG	breed=charolais,gelbvieh,hereford,limousin,simmental,Angus	rs41567028
6	block_145_chr_6	rs29026121	rs110517212	37778924	37933250	154326	0.04626	Production	37919860	37919864	QTL_ID=186481	trait=Metabolic_body_weight	Abbrev=MBW	breed=charolais,gelbvieh,hereford,limousin,simmental,Angus	rs133962079
6	block_145_chr_6	rs29026121	rs110517212	37778924	37933250	154326	0.04626	Production	37920303	37920307	QTL_ID=186568	trait=Metabolic_body_weight	Abbrev=MBW	breed=charolais,gelbvieh,hereford,limousin,simmental,Angus	rs137703542
6	block_145_chr_6	rs29026121	rs110517212	37778924	37933250	154326	0.04626	Production	37920536	37920540	QTL_ID=182083	trait=Dry_matter_intake	Abbrev=DMI	breed=charolais,gelbvieh,hereford,limousin,simmental,Angus	rs110278830
6	block_145_chr_6	rs29026121	rs110517212	37778924	37933250	154326	0.04626	Production	37920536	37920540	QTL_ID=184614	trait=Average_daily_gain	Abbrev=ADG	breed=charolais,gelbvieh,hereford,limousin,simmental,Angus	rs135839099
6	block_145_chr_6	rs29026121	rs110517212	37778924	37933250	154326	0.04626	Production	37920536	37920540	QTL_ID=187448	trait=Metabolic_body_weight	Abbrev=MBW	breed=charolais,gelbvieh,hereford,limousin,simmental,Angus	rs133389953
6	block_145_chr_6	rs29026121	rs110517212	37778924	37933250	154326	0.04626	Production	37920549	37920553	QTL_ID=182085	trait=Dry_matter_intake	Abbrev=DMI	breed=charolais,gelbvieh,hereford,limousin,simmental,Angus	rs135180328
6	block_145_chr_6	rs29026121	rs110517212	37778924	37933250	154326	0.04626	Production	37920549	37920553	QTL_ID=184747	trait=Average_daily_gain	Abbrev=ADG	breed=charolais,gelbvieh,hereford,limousin,simmental,Angus	rs110207706
6	block_145_chr_6	rs29026121	rs110517212	37778924	37933250	154326	0.04626	Production	37920549	37920553	QTL_ID=187642	trait=Metabolic_body_weight	Abbrev=MBW	breed=charolais,gelbvieh,hereford,limousin,simmental,Angus	rs109109118
6	block_145_chr_6	rs29026121	rs110517212	37778924	37933250	154326	0.04626	Production	37920664	37920668	QTL_ID=182089	trait=Dry_matter_intake	Abbrev=DMI	breed=charolais,gelbvieh,hereford,limousin,simmental,Angus	rs109892875
6	block_145_chr_6	rs29026121	rs110517212	37778924	37933250	154326	0.04626	Production	37920664	37920668	QTL_ID=184762	trait=Average_daily_gain	Abbrev=ADG	breed=charolais,gelbvieh,hereford,limousin,simmental,Angus	rs136213891
6	block_145_chr_6	rs29026121	rs110517212	37778924	37933250	154326	0.04626	Production	37920664	37920668	QTL_ID=187676	trait=Metabolic_body_weight	Abbrev=MBW	breed=charolais,gelbvieh,hereford,limousin,simmental,Angus	rs134717940
6	block_145_chr_6	rs29026121	rs110517212	37778924	37933250	154326	0.04626	Production	37921508	37921512	QTL_ID=182065	trait=Dry_matter_intake	Abbrev=DMI	breed=charolais,gelbvieh,hereford,limousin,simmental,Angus	rs136488569
6	block_145_chr_6	rs29026121	rs110517212	37778924	37933250	154326	0.04626	Production	37921508	37921512	QTL_ID=184182	trait=Average_daily_gain	Abbrev=ADG	breed=charolais,gelbvieh,hereford,limousin,simmental,Angus	rs136348029
6	block_145_chr_6	rs29026121	rs110517212	37778924	37933250	154326	0.04626	Production	37921508	37921512	QTL_ID=186839	trait=Metabolic_body_weight	Abbrev=MBW	breed=charolais,gelbvieh,hereford,limousin,simmental,Angus	rs109060163
[truncated: 1,297 more rows]

## Sheet: Haplotypes_LD0.50_top_0.05%
Genes overlapped with the top 0.001% markers in percentage of variance explained
[truncated: 1,054 more rows]

## Sheet: Haplotypes_LD0.80_top_0.05%
Genes overlapped with the top 0.001% markers in percentage of variance explained
[truncated: 662 more rows]
