# Supplementary material for: Haplotype-Based Single-Step GWAS for Yearling Temperament in American Angus Cattle
Source: Genes (Basel). 2021 Dec 22;13(1):17. doi: 10.3390/genes13010017 (PMC8775055; doi:10.3390/genes13010017)
Supplement: Supplementary file 1 [file genes-13-00017-s001.zip › genes-1492001-supplementary/Supplementary_File_S3.xlsx]

## Sheet: SNP_Haplotypes_LD0.15_top_0.001
Genes overlapped with the top 0.001% markers in percentage of variance explained
Chromosome	Marker	Start_SNP (marker)	END_SNP (marker)	Start_Position (marker)	End_Position (marker)	Size_in_kb(marker)	%Variance_explained	Ensembl_gene_ID	Start_Position (gene)	End_Position (gene)	Gene_name	Gene_type
1	block_103_chr_1	rs43227039	rs43713002	33533083	33560583	27500	0.05499
1	block_387_chr_1	rs41661378	rs42296756	110396001	110420546	24545	0.06196
1	block_408_chr_1	rs109483880	rs29019947	116654067	116725563	71496	0.05157	ENSBTAG00000015837	116694941	116747192	P2RY12	protein_coding
1	block_408_chr_1	rs109483880	rs29019947	116654067	116725563	71496	0.05157	ENSBTAG00000021703	116654940	117017533	MED12L	protein_coding
1	block_577_chr_1	rs109668017	rs41617748	156644833	156682865	38032	0.04994	ENSBTAG00000012798	156340497	156841779	KCNH8	protein_coding
2	block_232_chr_2	rs42865738	rs42452794	59000546	59024466	23920	0.05758
3	block_108_chr_3	rs109542056	rs29012800	35139604	35171112	31508	0.04811
3	block_137_chr_3	rs41624161	rs42967999	46986210	47013530	27320	0.08996
3	block_187_chr_3	rs42775050	rs29018018	63532368	63553291	20923	0.05137
3	block_420_chr_3	rs110656886	rs42460993	113880893	113901073	20180	0.05242	ENSBTAG00000054838	113885085	113894870	lncRNA
4	block_291_chr_4	rs41599805	rs41654185	80520587	80544515	23928	0.04913	ENSBTAG00000032121	80159127	80928936	SUGCT	protein_coding
4	block_46_chr_4	rs41659143	rs41659140	15935175	15961687	26512	0.04969	ENSBTAG00000043805	15943455	15943556	5S_rRNA	rRNA
4	block_46_chr_4	rs41659143	rs41659140	15935175	15961687	26512	0.04969	ENSBTAG00000047004	15734909	15991563	UMAD1	protein_coding
4	block_87_chr_4	rs29013539	rs41653992	26796377	26854185	57808	0.05561
5	rs110194000_5_chr_	rs110194000	rs110194000	118257944	118257944	1	0.05111
6	block_190_chr_6	rs109134234	rs41652042	45135036	45156602	21566	0.05278
6	block_35_chr_6	rs42225323	rs29016228	8342803	8368753	25950	0.05181
6	block_4_chr_6	rs110710192	rs41663389	641260	670124	28864	0.04814
7	block_342_chr_7	rs41605716	rs41580804	89523902	89546406	22504	0.05361
9	block_137_chr_9	rs41971041	rs29014434	36978435	37003884	25449	0.05107
9	block_188_chr_9	rs41575824	rs42411844	53639845	53659493	19648	0.06697	ENSBTAG00000007989	53645198	53646339	FUT9	protein_coding
10	block_382_chr_10	rs42814092	rs41574001	97887096	97926876	39780	0.05749
11	block_70_chr_11	rs110341524	rs109073558	13441766	13510010	68244	0.06538	ENSBTAG00000010605	13482524	13508824	VAX2	protein_coding
11	block_70_chr_11	rs110341524	rs109073558	13441766	13510010	68244	0.06538	ENSBTAG00000010620	13454348	13480401	ATP6V1B1	protein_coding
11	block_70_chr_11	rs110341524	rs109073558	13441766	13510010	68244	0.06538	ENSBTAG00000010623	13434822	13442574	ANKRD53	protein_coding
11	block_70_chr_11	rs110341524	rs109073558	13441766	13510010	68244	0.06538	ENSBTAG00000051968	13509110	13509305	misc_RNA
14	block_213_chr_14	rs43576496	rs41661153	41944778	41965713	20935	0.05005	ENSBTAG00000016284	41937221	41996546	IL7	protein_coding
15	block_28_chr_15	rs41616472	rs29021295	13120951	13148806	27855	0.05452
16	block_342_chr_16	rs41664179	rs41664177	77631297	77660465	29168	0.05029	ENSBTAG00000023144	77600496	77669271	PTPRC	protein_coding
16	block_342_chr_16	rs41664179	rs41664177	77631297	77660465	29168	0.05029	ENSBTAG00000046345	77633793	77634326	protein_coding
17	block_115_chr_17	rs41584520	rs41839246	28599062	28637922	38860	0.05169
18	block_6_chr_18	rs110151403	rs109766638	2132264	2159912	27648	0.07072	ENSBTAG00000012216	2123144	2146610	MLKL	protein_coding
18	block_6_chr_18	rs110151403	rs109766638	2132264	2159912	27648	0.07072	ENSBTAG00000012222	2151216	2205687	FA2H	protein_coding
19	block_159_chr_19	rs43729464	rs29015754	41594056	41619572	25516	0.05875	ENSBTAG00000013685	41614120	41619258	KRT31	protein_coding
19	block_159_chr_19	rs43729464	rs29015754	41594056	41619572	25516	0.05875	ENSBTAG00000037560	41593205	41597632	KRT34	protein_coding
20	block_143_chr_20	rs42543872	rs42543895	38543545	38571692	28147	0.06682	ENSBTAG00000023529	38369475	38572090	SPEF2	protein_coding
20	rs43350564_20_chr_	rs43350564	rs43350564	4709731	4709731	1	0.04894
22	block_166_chr_22	rs41644452	rs42013343	46740639	46762508	21869	0.06221	ENSBTAG00000013117	45924535	46818511	CACNA2D3	protein_coding
22	block_244_chr_22	rs110904383	rs109051741	60225202	60258838	33636	0.0644	ENSBTAG00000009159	60240226	60280068	PLXNA1	protein_coding
22	block_92_chr_22	rs42003955	rs109009750	23083081	23111139	28058	0.0749
23	block_19_chr_23	rs110708312	rs109793138	4861885	4892090	30205	0.04868	ENSBTAG00000025718	4789382	4986934	HMGCLL1	protein_coding
23	block_59_chr_23	rs109152735	rs109130384	15338295	15367501	29206	0.07917	ENSBTAG00000014211	15366276	15417429	FOXP4	protein_coding
26	block_187_chr_26	rs109450346	rs42101711	46765748	46787804	22056	0.05165	ENSBTAG00000031890	46392481	46948728	DOCK1	protein_coding
26	block_193_chr_26	rs110105463	rs111008529	48859017	48880894	21877	0.05095	ENSBTAG00000050386	48818674	49095122	MGMT	protein_coding
26	block_26_chr_26	rs110924756	rs110358830	9836117	9867428	31311	0.0557	ENSBTAG00000048748	9806435	9850770	lncRNA
26	block_39_chr_26	rs41592466	rs42478675	12333205	12369234	36029	0.07229
27	block_26_chr_27	rs42437286	rs42439066	8639941	8672918	32977	0.06337	ENSBTAG00000049151	8664638	8667964	lncRNA
27	block_96_chr_27	rs29013433	rs41646744	24812065	24839161	27096	0.07525
28	block_162_chr_28	rs109982860	rs41615110	37709725	37747210	37485	0.05132	ENSBTAG00000009587	36896430	38132186	NRG3	protein_coding
29	block_75_chr_29	rs41575769	rs29021971	24098223	24117260	19037	0.07054	ENSBTAG00000048576	24002708	24295209	protein_coding
30	block_7_chr_30	rs41580586	rs110351182	135777265	135799326	22061	0.05204
30	block_8_chr_30	rs42202984	rs42204099	136572031	136601015	28984	0.04941	ENSBTAG00000027841	136346606	136694634	protein_coding
QTL overlapped with the top 0.001% markers in percentage of variance explained
Chromosome	Marker	Start_SNP (marker)	END_SNP (marker)	Start_Position (marker)	End_Position (marker)	Size_in_kb(marker)	%Variance_explained	QTL_Type	Start_Position (QTL)	End_Position (QTL)	QTL_ID	Trait_associated	Trait_Abreviation	Breeds_found	Tag_SNP
1	block_408_chr_1	rs109483880	rs29019947	116654067	116725563	71496	0.05157	Reproduction	116678367	116678371	QTL_ID=212443	trait=Inseminations_per_conception	Abbrev=CONCEPT	breed=holstein	rs137041533
1	block_577_chr_1	rs109668017	rs41617748	156644833	156682865	38032	0.04994	Milk	156682863	156682867	QTL_ID=25762	trait=Milk_fat_yield	Abbrev=FY	breed=jersey	rs43276300
3	block_108_chr_3	rs109542056	rs29012800	35139604	35171112	31508	0.04811	Exterior	35139602	35139606	QTL_ID=28109	trait=Dairy_form	Abbrev=DYF	breed=holstein	rs43101620,rs110769771
3	block_108_chr_3	rs109542056	rs29012800	35139604	35171112	31508	0.04811	Exterior	35139602	35139606	QTL_ID=28112	trait=Angularity	Abbrev=ANG	breed=holstein	rs109050772,rs42634055
3	block_137_chr_3	rs41624161	rs42967999	46986210	47013530	27320	0.08996	Exterior	47013528	47013532	QTL_ID=39799	trait=Rump_angle	Abbrev=RANG	breed=holstein	rs109460728
3	block_137_chr_3	rs41624161	rs42967999	46986210	47013530	27320	0.08996	Milk	47013528	47013532	QTL_ID=39795	trait=Milk_fat_yield	Abbrev=FY	breed=holstein	rs109460728
3	block_137_chr_3	rs41624161	rs42967999	46986210	47013530	27320	0.08996	Milk	47013528	47013532	QTL_ID=39796	trait=Milk_yield	Abbrev=MY	breed=holstein	rs109460728
3	block_137_chr_3	rs41624161	rs42967999	46986210	47013530	27320	0.08996	Milk	47013528	47013532	QTL_ID=39798	trait=Milk_protein_yield	Abbrev=PY	breed=holstein	rs109460728
3	block_137_chr_3	rs41624161	rs42967999	46986210	47013530	27320	0.08996	Milk	.	.	QTL_ID=105587	trait=Milk_protein_percentage	Abbrev=PP	breed=charolais,chianina,gelbvieh,hereford,holstein,limousin,piedmontese,red_angus,simmental,Angus,Maine-Anjou	rs42967999
3	block_137_chr_3	rs41624161	rs42967999	46986210	47013530	27320	0.08996	Production	47013528	47013532	QTL_ID=39797	trait=Net_merit	Abbrev=NM	breed=holstein	rs109460728
3	block_137_chr_3	rs41624161	rs42967999	46986210	47013530	27320	0.08996	Production	.	.	QTL_ID=5321	trait=Residual_feed_intake	Abbrev=RFI	breed=holstein	rs42967999
3	block_137_chr_3	rs41624161	rs42967999	46986210	47013530	27320	0.08996	Reproduction	47013528	47013532	QTL_ID=39794	trait=Calving_ease_(maternal)	Abbrev=CALEASE	breed=holstein	rs109460728
3	block_137_chr_3	rs41624161	rs42967999	46986210	47013530	27320	0.08996	Reproduction	47013528	47013532	QTL_ID=39800	trait=Calving_ease	Abbrev=CALEASE	breed=holstein	rs109460728
3	block_420_chr_3	rs110656886	rs42460993	113880893	113901073	20180	0.05242	Milk	113884234	113884238	QTL_ID=64006	trait=Milk_riboflavin_content	Abbrev=RIBO	breed=holstein	rs41649818,rs29011657
3	block_420_chr_3	rs110656886	rs42460993	113880893	113901073	20180	0.05242	Milk	113889410	113889414	QTL_ID=64007	trait=Milk_riboflavin_content	Abbrev=RIBO	breed=holstein	rs134458891,rs136801407
4	block_87_chr_4	rs29013539	rs41653992	26796377	26854185	57808	0.05561	Milk	26854183	26854187	QTL_ID=26726	trait=Milk_protein_percentage	Abbrev=PP	breed=holstein	rs110562779
6	block_4_chr_6	rs110710192	rs41663389	641260	670124	28864	0.04814	Exterior	641258	641262	QTL_ID=41728	trait=Feet_and_leg_conformation	Abbrev=FTLEG	breed=Angus	rs135314769
6	block_4_chr_6	rs110710192	rs41663389	641260	670124	28864	0.04814	Exterior	641258	641262	QTL_ID=41731	trait=Teat_placement_-_front	Abbrev=FTPL	breed=gelbvieh	rs135411900
6	block_4_chr_6	rs110710192	rs41663389	641260	670124	28864	0.04814	Exterior	641258	641262	QTL_ID=41732	trait=Udder_attachment	Abbrev=UA	breed=gelbvieh	rs135640023
6	block_4_chr_6	rs110710192	rs41663389	641260	670124	28864	0.04814	Exterior	641258	641262	QTL_ID=41737	trait=Rear_leg_placement_-_rear_view	Abbrev=RLEGR	breed=gelbvieh	rs136137849
6	block_4_chr_6	rs110710192	rs41663389	641260	670124	28864	0.04814	Exterior	641258	641262	QTL_ID=41738	trait=Teat_placement_-_rear	Abbrev=RTPL	breed=charolais,gelbvieh,hereford,limousin,pinzgauer,red_angus,red_poll,simmental,Angus	rs136190942
6	block_4_chr_6	rs110710192	rs41663389	641260	670124	28864	0.04814	Exterior	641258	641262	QTL_ID=41739	trait=Udder_height	Abbrev=UHT	breed=charolais,gelbvieh,hereford,limousin,pinzgauer,red_angus,red_poll,simmental,Angus	rs136257809
6	block_4_chr_6	rs110710192	rs41663389	641260	670124	28864	0.04814	Exterior	641258	641262	QTL_ID=41741	trait=Stature	Abbrev=STA	breed=charolais,gelbvieh,hereford,limousin,pinzgauer,red_angus,red_poll,simmental,Angus	rs136413048
6	block_4_chr_6	rs110710192	rs41663389	641260	670124	28864	0.04814	Exterior	641258	641262	QTL_ID=41742	trait=Strength	Abbrev=STR	breed=charolais,gelbvieh,hereford,limousin,pinzgauer,red_angus,red_poll,simmental,Angus	rs136416413
6	block_4_chr_6	rs110710192	rs41663389	641260	670124	28864	0.04814	Exterior	641258	641262	QTL_ID=41743	trait=Udder_depth	Abbrev=UDPTH	breed=Girolando	rs136523990
6	block_4_chr_6	rs110710192	rs41663389	641260	670124	28864	0.04814	Milk	641258	641262	QTL_ID=41729	trait=Milk_fat_percentage	Abbrev=FP	breed=holstein	rs135384060
6	block_4_chr_6	rs110710192	rs41663389	641260	670124	28864	0.04814	Milk	641258	641262	QTL_ID=41733	trait=Milk_fat_yield	Abbrev=FY	breed=charolais,gelbvieh,hereford,limousin,pinzgauer,red_angus,red_poll,simmental,Angus	rs135680544
6	block_4_chr_6	rs110710192	rs41663389	641260	670124	28864	0.04814	Milk	641258	641262	QTL_ID=41735	trait=Milk_protein_percentage	Abbrev=PP	breed=holstein	rs135922395
6	block_4_chr_6	rs110710192	rs41663389	641260	670124	28864	0.04814	Milk	641258	641262	QTL_ID=41736	trait=Milk_protein_yield	Abbrev=PY	breed=gelbvieh	rs135937048
6	block_4_chr_6	rs110710192	rs41663389	641260	670124	28864	0.04814	Production	641258	641262	QTL_ID=41726	trait=Body_depth	Abbrev=BD	breed=Hanwoo	rs135125616
6	block_4_chr_6	rs110710192	rs41663389	641260	670124	28864	0.04814	Production	641258	641262	QTL_ID=41730	trait=PTA_type	Abbrev=PTAT	breed=Angus	rs135400595
6	block_4_chr_6	rs110710192	rs41663389	641260	670124	28864	0.04814	Production	641258	641262	QTL_ID=41734	trait=Net_merit	Abbrev=NM	breed=charolais,gelbvieh,hereford,limousin,pinzgauer,red_angus,red_poll,simmental,Angus	rs135688682
6	block_4_chr_6	rs110710192	rs41663389	641260	670124	28864	0.04814	Production	641258	641262	QTL_ID=41740	trait=Rump_width	Abbrev=RUMWD	breed=charolais,gelbvieh,hereford,limousin,pinzgauer,red_angus,red_poll,simmental,Angus	rs136283820
6	block_4_chr_6	rs110710192	rs41663389	641260	670124	28864	0.04814	Reproduction	641258	641262	QTL_ID=41727	trait=Calving_ease_(maternal)	Abbrev=CALEASE	breed=brangus	rs135147861
6	block_190_chr_6	rs109134234	rs41652042	45135036	45156602	21566	0.05278	Production	45135034	45135038	QTL_ID=67176	trait=Body_weight_(birth)	Abbrev=BW	breed=holstein	rs110694171
6	block_190_chr_6	rs109134234	rs41652042	45135036	45156602	21566	0.05278	Production	45135034	45135038	QTL_ID=67177	trait=Body_weight_(yearling)	Abbrev=W365	breed=holstein	rs110855129
6	block_190_chr_6	rs109134234	rs41652042	45135036	45156602	21566	0.05278	Production	45135034	45135038	QTL_ID=67178	trait=Body_weight_gain	Abbrev=BWG	breed=holstein	rs110292608
6	block_190_chr_6	rs109134234	rs41652042	45135036	45156602	21566	0.05278	Production	45156600	45156604	QTL_ID=66530	trait=Body_weight_(birth)	Abbrev=BW	breed=holstein	rs109353886
6	block_190_chr_6	rs109134234	rs41652042	45135036	45156602	21566	0.05278	Production	45156600	45156604	QTL_ID=67607	trait=Body_weight_(yearling)	Abbrev=W365	breed=holstein	rs109353886
6	block_190_chr_6	rs109134234	rs41652042	45135036	45156602	21566	0.05278	Production	45156600	45156604	QTL_ID=67608	trait=Body_weight_gain	Abbrev=BWG	breed=holstein	rs109318073
7	block_342_chr_7	rs41605716	rs41580804	89523902	89546406	22504	0.05361	Exterior	89523900	89523904	QTL_ID=43369	trait=Dairy_form	Abbrev=DYF	breed=brahman	rs29025644,rs110378393
7	block_342_chr_7	rs41605716	rs41580804	89523902	89546406	22504	0.05361	Exterior	89523900	89523904	QTL_ID=43370	trait=Feet_and_leg_conformation	Abbrev=FTLEG	breed=charolais,chianina,gelbvieh,hereford,holstein,limousin,piedmontese,red_angus,simmental,Angus,Maine-Anjou	rs43643999,rs109559045
7	block_342_chr_7	rs41605716	rs41580804	89523902	89546406	22504	0.05361	Exterior	89523900	89523904	QTL_ID=43372	trait=Teat_placement_-_front	Abbrev=FTPL	breed=holstein	rs41656867,rs109989268
7	block_342_chr_7	rs41605716	rs41580804	89523902	89546406	22504	0.05361	Exterior	89523900	89523904	QTL_ID=43373	trait=Udder_attachment	Abbrev=UA	breed=holstein	rs43642998,rs43650173
7	block_342_chr_7	rs41605716	rs41580804	89523902	89546406	22504	0.05361	Exterior	89523900	89523904	QTL_ID=43374	trait=Rear_leg_placement_-_rear_view	Abbrev=RLEGR	breed=holstein	rs109914287,rs43650187
7	block_342_chr_7	rs41605716	rs41580804	89523902	89546406	22504	0.05361	Exterior	89523900	89523904	QTL_ID=43375	trait=Teat_placement_-_rear	Abbrev=RTPL	breed=charolais,chianina,gelbvieh,hereford,holstein,limousin,piedmontese,red_angus,simmental,Angus,Maine-Anjou	rs110179938,rs110169119
7	block_342_chr_7	rs41605716	rs41580804	89523902	89546406	22504	0.05361	Exterior	89523900	89523904	QTL_ID=43376	trait=Udder_height	Abbrev=UHT	breed=charolais,gelbvieh,hereford,limousin,pinzgauer,red_angus,red_poll,simmental,Angus	rs110201865,rs110056495
7	block_342_chr_7	rs41605716	rs41580804	89523902	89546406	22504	0.05361	Exterior	89523900	89523904	QTL_ID=43378	trait=Stature	Abbrev=STA	breed=charolais,gelbvieh,hereford,limousin,pinzgauer,red_angus,red_poll,simmental,Angus	rs43642675,rs43643308
7	block_342_chr_7	rs41605716	rs41580804	89523902	89546406	22504	0.05361	Exterior	89523900	89523904	QTL_ID=43379	trait=Strength	Abbrev=STR	breed=charolais,gelbvieh,hereford,limousin,pinzgauer,red_angus,red_poll,simmental,Angus	rs41593885,rs110566925
7	block_342_chr_7	rs41605716	rs41580804	89523902	89546406	22504	0.05361	Exterior	89523900	89523904	QTL_ID=43380	trait=Udder_cleft	Abbrev=UC	breed=holstein	rs43647828,rs42868836
7	block_342_chr_7	rs41605716	rs41580804	89523902	89546406	22504	0.05361	Exterior	89523900	89523904	QTL_ID=43381	trait=Udder_depth	Abbrev=UDPTH	breed=holstein	rs110584450,rs109103352
7	block_342_chr_7	rs41605716	rs41580804	89523902	89546406	22504	0.05361	Exterior	89546404	89546408	QTL_ID=43383	trait=Dairy_form	Abbrev=DYF	breed=holstein	rs132960291,rs110702652,rs136362611
7	block_342_chr_7	rs41605716	rs41580804	89523902	89546406	22504	0.05361	Exterior	89546404	89546408	QTL_ID=43384	trait=Feet_and_leg_conformation	Abbrev=FTLEG	breed=charolais,gelbvieh,hereford,limousin,pinzgauer,red_angus,red_poll,simmental,Angus	rs132960291,rs110702652,rs136362611
7	block_342_chr_7	rs41605716	rs41580804	89523902	89546406	22504	0.05361	Exterior	89546404	89546408	QTL_ID=43386	trait=Teat_placement_-_front	Abbrev=FTPL	breed=ayrshire,danish_red,holstein,jersey,norwegian_red,Swedish_Red-and-White	rs43619255,rs41655411,rs43614585
7	block_342_chr_7	rs41605716	rs41580804	89523902	89546406	22504	0.05361	Exterior	89546404	89546408	QTL_ID=43387	trait=Udder_attachment	Abbrev=UA	breed=holstein	rs135198463,rs41597142,rs136081666
7	block_342_chr_7	rs41605716	rs41580804	89523902	89546406	22504	0.05361	Exterior	89546404	89546408	QTL_ID=43388	trait=Rear_leg_placement_-_rear_view	Abbrev=RLEGR	breed=holstein	rs109898540
7	block_342_chr_7	rs41605716	rs41580804	89523902	89546406	22504	0.05361	Exterior	89546404	89546408	QTL_ID=43389	trait=Teat_placement_-_rear	Abbrev=RTPL	breed=holstein	rs109755494
7	block_342_chr_7	rs41605716	rs41580804	89523902	89546406	22504	0.05361	Exterior	89546404	89546408	QTL_ID=43390	trait=Udder_height	Abbrev=UHT	breed=holstein	rs109220955
7	block_342_chr_7	rs41605716	rs41580804	89523902	89546406	22504	0.05361	Exterior	89546404	89546408	QTL_ID=43392	trait=Stature	Abbrev=STA	breed=holstein	rs29022040
7	block_342_chr_7	rs41605716	rs41580804	89523902	89546406	22504	0.05361	Exterior	89546404	89546408	QTL_ID=43393	trait=Strength	Abbrev=STR	breed=holstein	rs137826123
7	block_342_chr_7	rs41605716	rs41580804	89523902	89546406	22504	0.05361	Exterior	89546404	89546408	QTL_ID=43394	trait=Udder_cleft	Abbrev=UC	breed=brahman	rs133252628
7	block_342_chr_7	rs41605716	rs41580804	89523902	89546406	22504	0.05361	Exterior	89546404	89546408	QTL_ID=43395	trait=Udder_depth	Abbrev=UDPTH	breed=brahman	rs137713131
7	block_342_chr_7	rs41605716	rs41580804	89523902	89546406	22504	0.05361	Production	89523900	89523904	QTL_ID=43368	trait=Body_depth	Abbrev=BD	breed=blonde_d'aquitaine	rs42802606,rs41656325
7	block_342_chr_7	rs41605716	rs41580804	89523902	89546406	22504	0.05361	Production	89523900	89523904	QTL_ID=43371	trait=PTA_type	Abbrev=PTAT	breed=charolais,chianina,gelbvieh,hereford,holstein,limousin,piedmontese,red_angus,simmental,Angus,Maine-Anjou	rs43642952,rs43637279
7	block_342_chr_7	rs41605716	rs41580804	89523902	89546406	22504	0.05361	Production	89523900	89523904	QTL_ID=43377	trait=Rump_width	Abbrev=RUMWD	breed=Angus	rs110838923,rs41594273
7	block_342_chr_7	rs41605716	rs41580804	89523902	89546406	22504	0.05361	Production	89546404	89546408	QTL_ID=43382	trait=Body_depth	Abbrev=BD	breed=holstein	rs43643837,rs42868892
7	block_342_chr_7	rs41605716	rs41580804	89523902	89546406	22504	0.05361	Production	89546404	89546408	QTL_ID=43385	trait=PTA_type	Abbrev=PTAT	breed=holstein	rs43619255,rs41655411,rs43614585
7	block_342_chr_7	rs41605716	rs41580804	89523902	89546406	22504	0.05361	Production	89546404	89546408	QTL_ID=43391	trait=Rump_width	Abbrev=RUMWD	breed=holstein	rs137527434
9	block_137_chr_9	rs41971041	rs29014434	36978435	37003884	25449	0.05107	Milk	36978433	36978437	QTL_ID=130701	trait=Curd_water_yield	Abbrev=CYWAT	breed=holstein	rs43663781
14	block_213_chr_14	rs43576496	rs41661153	41944778	41965713	20935	0.05005	Milk	41944776	41944780	QTL_ID=158090	trait=Milking_speed	Abbrev=MSPD	breed=holstein	rs109715014
14	block_213_chr_14	rs43576496	rs41661153	41944778	41965713	20935	0.05005	Milk	41944776	41944780	QTL_ID=175015	trait=Milk_protein_percentage	Abbrev=PP	breed=holstein	rs42311889
18	block_6_chr_18	rs110151403	rs109766638	2132264	2159912	27648	0.07072	Exterior	2159910	2159914	QTL_ID=49435	trait=Foot_angle	Abbrev=FANG	breed=brown_swiss	rs110423515
18	block_6_chr_18	rs110151403	rs109766638	2132264	2159912	27648	0.07072	Exterior	2159910	2159914	QTL_ID=49436	trait=Feet_and_leg_conformation	Abbrev=FTLEG	breed=brown_swiss	rs41653204
18	block_6_chr_18	rs110151403	rs109766638	2132264	2159912	27648	0.07072	Exterior	2159910	2159914	QTL_ID=49439	trait=Udder_attachment	Abbrev=UA	breed=brown_swiss	rs111007616
18	block_6_chr_18	rs110151403	rs109766638	2132264	2159912	27648	0.07072	Exterior	2159910	2159914	QTL_ID=49445	trait=Rear_leg_placement_-_rear_view	Abbrev=RLEGR	breed=brown_swiss	rs41923843
18	block_6_chr_18	rs110151403	rs109766638	2132264	2159912	27648	0.07072	Exterior	2159910	2159914	QTL_ID=49446	trait=Rear_leg_placement_-_side_view	Abbrev=RLEGS	breed=brown_swiss	rs41924637
18	block_6_chr_18	rs110151403	rs109766638	2132264	2159912	27648	0.07072	Exterior	2159910	2159914	QTL_ID=49449	trait=Strength	Abbrev=STR	breed=brown_swiss	rs441811558
18	block_6_chr_18	rs110151403	rs109766638	2132264	2159912	27648	0.07072	Exterior	2159910	2159914	QTL_ID=49450	trait=Udder_depth	Abbrev=UDPTH	breed=brown_swiss	rs109195501
18	block_6_chr_18	rs110151403	rs109766638	2132264	2159912	27648	0.07072	Milk	2159910	2159914	QTL_ID=49437	trait=Milk_fat_percentage	Abbrev=FP	breed=brown_swiss	rs109603247
18	block_6_chr_18	rs110151403	rs109766638	2132264	2159912	27648	0.07072	Milk	2159910	2159914	QTL_ID=49440	trait=Milk_fat_yield	Abbrev=FY	breed=brown_swiss	rs386089602,rs380102255,rs384012411
18	block_6_chr_18	rs110151403	rs109766638	2132264	2159912	27648	0.07072	Milk	2159910	2159914	QTL_ID=49443	trait=Milk_protein_percentage	Abbrev=PP	breed=brown_swiss	rs134785404
18	block_6_chr_18	rs110151403	rs109766638	2132264	2159912	27648	0.07072	Milk	2159910	2159914	QTL_ID=49444	trait=Milk_protein_yield	Abbrev=PY	breed=brown_swiss	rs41923838
18	block_6_chr_18	rs110151403	rs109766638	2132264	2159912	27648	0.07072	Production	2159910	2159914	QTL_ID=49438	trait=PTA_type	Abbrev=PTAT	breed=brown_swiss	rs109603247
18	block_6_chr_18	rs110151403	rs109766638	2132264	2159912	27648	0.07072	Production	2159910	2159914	QTL_ID=49441	trait=Net_merit	Abbrev=NM	breed=brown_swiss	rs380102255
18	block_6_chr_18	rs110151403	rs109766638	2132264	2159912	27648	0.07072	Production	2159910	2159914	QTL_ID=49442	trait=Length_of_productive_life	Abbrev=PL	breed=brown_swiss	rs110523614
18	block_6_chr_18	rs110151403	rs109766638	2132264	2159912	27648	0.07072	Reproduction	2132262	2132266	QTL_ID=106866	trait=Conception_rate	Abbrev=CONCRATE	breed=brown_swiss	rs109623709
18	block_6_chr_18	rs110151403	rs109766638	2132264	2159912	27648	0.07072	Reproduction	2159910	2159914	QTL_ID=49434	trait=Calving_ease_(maternal)	Abbrev=CALEASE	breed=brown_swiss	rs110805991
18	block_6_chr_18	rs110151403	rs109766638	2132264	2159912	27648	0.07072	Reproduction	2159910	2159914	QTL_ID=49447	trait=Calving_ease	Abbrev=CALEASE	breed=brown_swiss	rs801239373,rs41923848,rs1116256555
18	block_6_chr_18	rs110151403	rs109766638	2132264	2159912	27648	0.07072	Reproduction	2159910	2159914	QTL_ID=49448	trait=Stillbirth	Abbrev=SB	breed=brown_swiss	rs801239373,rs41923848,rs1116256555
19	block_159_chr_19	rs43729464	rs29015754	41594056	41619572	25516	0.05875	Milk	41594054	41594058	QTL_ID=200165	trait=Milk_myristic_acid_content	Abbrev=MFA-C14:0	breed=ayrshire,danish_red,Swedish_Red-and-White	rs133794351
20	rs43350564	rs43350564	rs43350564	4709731	4709731	1	0.04894	Exterior	4709729	4709733	QTL_ID=50404	trait=Feet_and_leg_conformation	Abbrev=FTLEG	breed=holstein	rs136574946
20	rs43350564	rs43350564	rs43350564	4709731	4709731	1	0.04894	Exterior	4709729	4709733	QTL_ID=50406	trait=Teat_placement_-_front	Abbrev=FTPL	breed=holstein	rs132888075
20	rs43350564	rs43350564	rs43350564	4709731	4709731	1	0.04894	Exterior	4709729	4709733	QTL_ID=50407	trait=Udder_attachment	Abbrev=UA	breed=holstein	rs135995007
20	rs43350564	rs43350564	rs43350564	4709731	4709731	1	0.04894	Exterior	4709729	4709733	QTL_ID=50409	trait=Teat_placement_-_rear	Abbrev=RTPL	breed=holstein	rs134340615
20	rs43350564	rs43350564	rs43350564	4709731	4709731	1	0.04894	Exterior	4709729	4709733	QTL_ID=50413	trait=Stature	Abbrev=STA	breed=braunvieh,holstein,jersey,normande,norwegian_red,Fleckvieh,Montbéliarde,Australian_Red	rs135416871
20	rs43350564	rs43350564	rs43350564	4709731	4709731	1	0.04894	Exterior	4709729	4709733	QTL_ID=50414	trait=Strength	Abbrev=STR	breed=holstein	rs133457830
20	rs43350564	rs43350564	rs43350564	4709731	4709731	1	0.04894	Exterior	4709729	4709733	QTL_ID=50415	trait=Teat_length	Abbrev=TLGTH	breed=jersey	rs135208296
20	rs43350564	rs43350564	rs43350564	4709731	4709731	1	0.04894	Exterior	4709729	4709733	QTL_ID=50416	trait=Udder_cleft	Abbrev=UC	breed=holstein	rs132852832
20	rs43350564	rs43350564	rs43350564	4709731	4709731	1	0.04894	Exterior	4709729	4709733	QTL_ID=50417	trait=Udder_depth	Abbrev=UDPTH	breed=holstein	rs134471789
20	rs43350564	rs43350564	rs43350564	4709731	4709731	1	0.04894	Health	4709729	4709733	QTL_ID=50412	trait=Somatic_cell_score	Abbrev=SCS	breed=holstein	rs211333797
20	rs43350564	rs43350564	rs43350564	4709731	4709731	1	0.04894	Production	4709729	4709733	QTL_ID=164127	trait=Body_weight_(weaning)	Abbrev=WWT	breed=holstein	rs385551988
20	rs43350564	rs43350564	rs43350564	4709731	4709731	1	0.04894	Production	4709729	4709733	QTL_ID=164206	trait=Body_weight_(yearling)	Abbrev=W365	breed=jersey	rs136073509
20	rs43350564	rs43350564	rs43350564	4709731	4709731	1	0.04894	Production	4709729	4709733	QTL_ID=164416	trait=Body_weight_(birth)	Abbrev=BW	breed=jersey	rs209178266
20	rs43350564	rs43350564	rs43350564	4709731	4709731	1	0.04894	Production	4709729	4709733	QTL_ID=164436	trait=Body_weight_(weaning)	Abbrev=WWT	breed=Angus	rs136638907
20	rs43350564	rs43350564	rs43350564	4709731	4709731	1	0.04894	Production	4709729	4709733	QTL_ID=164476	trait=Average_daily_gain	Abbrev=ADG	breed=holstein	rs379843779
20	rs43350564	rs43350564	rs43350564	4709731	4709731	1	0.04894	Production	4709729	4709733	QTL_ID=164535	trait=Body_weight_(yearling)	Abbrev=W365	breed=jersey	rs379127502
20	rs43350564	rs43350564	rs43350564	4709731	4709731	1	0.04894	Production	4709729	4709733	QTL_ID=176528	trait=Body_weight_(birth)	Abbrev=BW	breed=holstein	rs110354299
20	rs43350564	rs43350564	rs43350564	4709731	4709731	1	0.04894	Production	4709729	4709733	QTL_ID=186241	trait=Average_daily_gain	Abbrev=ADG	breed=holstein	rs133774342
20	rs43350564	rs43350564	rs43350564	4709731	4709731	1	0.04894	Production	4709729	4709733	QTL_ID=190174	trait=Metabolic_body_weight	Abbrev=MBW	breed=holstein	rs133204718
20	rs43350564	rs43350564	rs43350564	4709731	4709731	1	0.04894	Production	4709729	4709733	QTL_ID=50405	trait=PTA_type	Abbrev=PTAT	breed=holstein	rs137420632
20	rs43350564	rs43350564	rs43350564	4709731	4709731	1	0.04894	Production	4709729	4709733	QTL_ID=50408	trait=Length_of_productive_life	Abbrev=PL	breed=holstein	rs209318724
20	rs43350564	rs43350564	rs43350564	4709731	4709731	1	0.04894	Production	4709729	4709733	QTL_ID=50410	trait=Rump_width	Abbrev=RUMWD	breed=holstein	rs137010570
20	rs43350564	rs43350564	rs43350564	4709731	4709731	1	0.04894	Production	4709729	4709733	QTL_ID=66693	trait=Body_weight_(birth)	Abbrev=BW	breed=holstein	rs135280215
20	rs43350564	rs43350564	rs43350564	4709731	4709731	1	0.04894	Reproduction	4709729	4709733	QTL_ID=50403	trait=Calving_ease_(maternal)	Abbrev=CALEASE	breed=nelore	rs134074459
20	rs43350564	rs43350564	rs43350564	4709731	4709731	1	0.04894	Reproduction	4709729	4709733	QTL_ID=50411	trait=Calving_ease	Abbrev=CALEASE	breed=holstein	rs384903793
23	block_19_chr_23	rs110708312	rs109793138	4861885	4892090	30205	0.04868	Production	4861883	4861887	QTL_ID=157031	trait=Body_weight_(yearling)	Abbrev=W365	breed=brown_swiss	rs109199086
23	block_19_chr_23	rs110708312	rs109793138	4861885	4892090	30205	0.04868	Production	4892088	4892092	QTL_ID=157030	trait=Body_weight_(yearling)	Abbrev=W365	breed=brown_swiss	rs109176259
23	block_19_chr_23	rs110708312	rs109793138	4861885	4892090	30205	0.04868	Reproduction	4861883	4861887	QTL_ID=14785	trait=Fertility_treatments	Abbrev=FERTRT	breed=ayrshire,danish_red,Swedish_Red-and-White	rs42086574
23	block_59_chr_23	rs109152735	rs109130384	15338295	15367501	29206	0.07917	Production	15338293	15338297	QTL_ID=65985	trait=Body_weight	Abbrev=BW	breed=holstein	rs135126068
26	block_26_chr_26	rs110924756	rs110358830	9836117	9867428	31311	0.0557	Milk	9836115	9836119	QTL_ID=196414	trait=Milk_capric_acid_content	Abbrev=MFA-C10:0	breed=jersey	rs135267521
26	block_26_chr_26	rs110924756	rs110358830	9836117	9867428	31311	0.0557	Milk	9836115	9836119	QTL_ID=196415	trait=Milk_C14_index	Abbrev=MC14	breed=jersey	rs136677471
26	block_26_chr_26	rs110924756	rs110358830	9836117	9867428	31311	0.0557	Milk	9836115	9836119	QTL_ID=196416	trait=Milk_myristoleic_acid_content	Abbrev=MFA-C14:1	breed=jersey	rs133999305
26	block_26_chr_26	rs110924756	rs110358830	9836117	9867428	31311	0.0557	Milk	9836115	9836119	QTL_ID=32552	trait=Milk_myristoleic_acid_content	Abbrev=MFA-C14:1	breed=holstein	rs42092161
26	block_26_chr_26	rs110924756	rs110358830	9836117	9867428	31311	0.0557	Milk	9836115	9836119	QTL_ID=32611	trait=Milk_C14_index	Abbrev=MC14	breed=holstein	rs42092165
26	block_26_chr_26	rs110924756	rs110358830	9836117	9867428	31311	0.0557	Milk	9836115	9836119	QTL_ID=62834	trait=Milk_C14_index	Abbrev=MC14	breed=holstein	rs42092174
26	block_26_chr_26	rs110924756	rs110358830	9836117	9867428	31311	0.0557	Milk	9843563	9843567	QTL_ID=199984	trait=Milk_C14_index	Abbrev=MC14	breed=holstein	rs133999305
26	block_26_chr_26	rs110924756	rs110358830	9836117	9867428	31311	0.0557	Milk	9843563	9843567	QTL_ID=199985	trait=Milk_myristoleic_acid_content	Abbrev=MFA-C14:1	breed=holstein	rs135267521
26	block_26_chr_26	rs110924756	rs110358830	9836117	9867428	31311	0.0557	Milk	9844827	9844831	QTL_ID=199982	trait=Milk_C14_index	Abbrev=MC14	breed=holstein	rs133999305
26	block_26_chr_26	rs110924756	rs110358830	9836117	9867428	31311	0.0557	Milk	9844827	9844831	QTL_ID=199983	trait=Milk_myristoleic_acid_content	Abbrev=MFA-C14:1	breed=holstein	rs136677471
26	block_26_chr_26	rs110924756	rs110358830	9836117	9867428	31311	0.0557	Milk	9845785	9845789	QTL_ID=199980	trait=Milk_C14_index	Abbrev=MC14	breed=jersey	rs135267521
26	block_26_chr_26	rs110924756	rs110358830	9836117	9867428	31311	0.0557	Milk	9845785	9845789	QTL_ID=199981	trait=Milk_myristoleic_acid_content	Abbrev=MFA-C14:1	breed=holstein	rs136677471
26	block_26_chr_26	rs110924756	rs110358830	9836117	9867428	31311	0.0557	Milk	9854101	9854105	QTL_ID=197373	trait=Milk_C14_index	Abbrev=MC14	breed=holstein	rs133999305
26	block_26_chr_26	rs110924756	rs110358830	9836117	9867428	31311	0.0557	Milk	9854101	9854105	QTL_ID=197374	trait=Milk_myristoleic_acid_content	Abbrev=MFA-C14:1	breed=holstein	rs135267521
26	block_26_chr_26	rs110924756	rs110358830	9836117	9867428	31311	0.0557	Milk	9854101	9854105	QTL_ID=202582	trait=Milk_C16_index	Abbrev=MC16	breed=holstein	rs42091368
26	block_26_chr_26	rs110924756	rs110358830	9836117	9867428	31311	0.0557	Milk	9854101	9854105	QTL_ID=208787	trait=Milk_palmitoleic_acid_content	Abbrev=MFA-C16:1	breed=holstein	rs42091368
26	block_26_chr_26	rs110924756	rs110358830	9836117	9867428	31311	0.0557	Milk	9855254	9855258	QTL_ID=205130	trait=Milk_C16_index	Abbrev=MC16	breed=holstein	rs136313314
26	block_26_chr_26	rs110924756	rs110358830	9836117	9867428	31311	0.0557	Milk	9855254	9855258	QTL_ID=211354	trait=Milk_palmitoleic_acid_content	Abbrev=MFA-C16:1	breed=holstein	rs42091368
26	block_26_chr_26	rs110924756	rs110358830	9836117	9867428	31311	0.0557	Milk	9856557	9856561	QTL_ID=201804	trait=Milk_C16_index	Abbrev=MC16	breed=holstein	rs136677471
26	block_26_chr_26	rs110924756	rs110358830	9836117	9867428	31311	0.0557	Milk	9856557	9856561	QTL_ID=207725	trait=Milk_palmitoleic_acid_content	Abbrev=MFA-C16:1	breed=jersey	rs136313314
26	block_26_chr_26	rs110924756	rs110358830	9836117	9867428	31311	0.0557	Milk	9858273	9858277	QTL_ID=202223	trait=Milk_C16_index	Abbrev=MC16	breed=jersey	rs136313314
26	block_26_chr_26	rs110924756	rs110358830	9836117	9867428	31311	0.0557	Milk	9858273	9858277	QTL_ID=208286	trait=Milk_palmitoleic_acid_content	Abbrev=MFA-C16:1	breed=jersey	rs136313314
26	block_26_chr_26	rs110924756	rs110358830	9836117	9867428	31311	0.0557	Milk	9860637	9860641	QTL_ID=204991	trait=Milk_C16_index	Abbrev=MC16	breed=holstein	rs134295703
26	block_26_chr_26	rs110924756	rs110358830	9836117	9867428	31311	0.0557	Milk	9860637	9860641	QTL_ID=211233	trait=Milk_palmitoleic_acid_content	Abbrev=MFA-C16:1	breed=holstein	rs135669257
26	block_26_chr_26	rs110924756	rs110358830	9836117	9867428	31311	0.0557	Milk	9867426	9867430	QTL_ID=196073	trait=Milk_C14_index	Abbrev=MC14	breed=holstein	rs134295703
26	block_39_chr_26	rs41592466	rs42478675	12333205	12369234	36029	0.07229	Milk	12333203	12333207	QTL_ID=198366	trait=Milk_C14_index	Abbrev=MC14	breed=holstein	rs133825521
26	block_39_chr_26	rs41592466	rs42478675	12333205	12369234	36029	0.07229	Milk	12362522	12362526	QTL_ID=196694	trait=Milk_C14_index	Abbrev=MC14	breed=jersey	rs109909331
26	block_39_chr_26	rs41592466	rs42478675	12333205	12369234	36029	0.07229	Milk	12362522	12362526	QTL_ID=201952	trait=Milk_myristoleic_acid_content	Abbrev=MFA-C14:1	breed=jersey	rs109909331
26	block_39_chr_26	rs41592466	rs42478675	12333205	12369234	36029	0.07229	Milk	12363689	12363693	QTL_ID=197280	trait=Milk_C14_index	Abbrev=MC14	breed=holstein	rs134317139
26	block_39_chr_26	rs41592466	rs42478675	12333205	12369234	36029	0.07229	Milk	12363689	12363693	QTL_ID=202502	trait=Milk_myristoleic_acid_content	Abbrev=MFA-C14:1	breed=holstein	rs41660969
26	block_39_chr_26	rs41592466	rs42478675	12333205	12369234	36029	0.07229	Milk	12366434	12366438	QTL_ID=198163	trait=Milk_C14_index	Abbrev=MC14	breed=holstein	rs41660969
26	block_39_chr_26	rs41592466	rs42478675	12333205	12369234	36029	0.07229	Milk	12366434	12366438	QTL_ID=203349	trait=Milk_myristoleic_acid_content	Abbrev=MFA-C14:1	breed=holstein	rs41660969
26	block_39_chr_26	rs41592466	rs42478675	12333205	12369234	36029	0.07229	Milk	12369232	12369236	QTL_ID=199795	trait=Milk_C14_index	Abbrev=MC14	breed=jersey	rs109193590
26	block_39_chr_26	rs41592466	rs42478675	12333205	12369234	36029	0.07229	Milk	12369232	12369236	QTL_ID=204890	trait=Milk_myristoleic_acid_content	Abbrev=MFA-C14:1	breed=jersey	rs797226609
26	block_187_chr_26	rs109450346	rs42101711	46765748	46787804	22056	0.05165	Milk	46765746	46765750	QTL_ID=113783	trait=Milk_kappa-casein_percentage	Abbrev=MKCASP	breed=piedmontese
26	block_187_chr_26	rs109450346	rs42101711	46765748	46787804	22056	0.05165	Milk	46765746	46765750	QTL_ID=116938	trait=Milk_glycosylated_kappa-casein_percentage	Abbrev=MGKCASP	breed=charolais,hereford,limousin,simmental,Angus
27	block_96_chr_27	rs29013433	rs41646744	24812065	24839161	27096	0.07525	Reproduction	24839159	24839163	QTL_ID=62078	trait=Sperm_motility	Abbrev=SPMOT	breed=jersey
30	block_8_chr_30	rs42202984	rs42204099	136572031	136601015	28984	0.04941	Production	136581467	136581471	QTL_ID=131376	trait=Metabolic_body_weight	Abbrev=MBW	breed=holstein	rs42204048
30	block_8_chr_30	rs42202984	rs42204099	136572031	136601015	28984	0.04941	Production	136582620	136582624	QTL_ID=131377	trait=Metabolic_body_weight	Abbrev=MBW	breed=holstein	rs42203024
30	block_8_chr_30	rs42202984	rs42204099	136572031	136601015	28984	0.04941	Production	136584272	136584276	QTL_ID=131378	trait=Metabolic_body_weight	Abbrev=MBW	breed=holstein	rs42370862

## Sheet: SNP_Haplotypes_LD0.50_top_0.001
Genes overlapped with the top 0.001% markers in percentage of variance explained
Chromosome	Marker	Start_SNP (marker)	END_SNP (marker)	Start_Position (marker)	End_Position (marker)	Size_in_kb(marker)	%Variance_explained	Ensembl_gene_ID	Start_Position (gene)	End_Position (gene)	Gene_name	Gene_type
1	block_132_chr_1	rs43238752	rs41575644	64893868	64920298	26430	0.06783
1	block_240_chr_1	rs41661378	rs42296756	110396001	110420546	24545	0.07243
2	block_23_chr_2	rs43128174	rs43287402	9417024	9443359	26335	0.05749
2	block_90_chr_2	rs43303189	rs43302650	33265910	33302435	36525	0.05756	ENSBTAG00000045366	33277179	33277375	7SK	misc_RNA
3	block_117_chr_3	rs42775050	rs29018018	63532368	63553291	20923	0.04461
3	block_122_chr_3	rs42867969	rs43702513	64213749	64239387	25638	0.04828
3	block_133_chr_3	rs42750404	rs42750367	68294393	68316834	22441	0.05554
3	block_266_chr_3	rs110783401	rs109572605	112221070	112257692	36622	0.05202	ENSBTAG00000005784	111603940	112289188	CSMD2	protein_coding
3	block_270_chr_3	rs110656886	rs42460993	113880893	113901073	20180	0.04966	ENSBTAG00000054838	113885085	113894870	lncRNA
3	block_290_chr_3	rs109475915	rs43370810	120380233	120402371	22138	0.05737	ENSBTAG00000000789	120373077	120389112	PPP1R7	protein_coding
3	block_83_chr_3	rs43339412	rs43712305	48234094	48259870	25776	0.05625	ENSBTAG00000021537	48239823	48252404	RWDD3	protein_coding
4	block_133_chr_4	rs43402375	rs43400956	61247646	61322228	74582	0.04438	ENSBTAG00000001182	61204174	61302729	SEPTIN7	protein_coding
4	block_133_chr_4	rs43402375	rs43400956	61247646	61322228	74582	0.04438	ENSBTAG00000051302	61259466	61259572	U6	snRNA
4	block_29_chr_4	rs41659143	rs41659140	15935175	15961687	26512	0.05594	ENSBTAG00000043805	15943455	15943556	5S_rRNA	rRNA
4	block_29_chr_4	rs41659143	rs41659140	15935175	15961687	26512	0.05594	ENSBTAG00000047004	15734909	15991563	UMAD1	protein_coding
5	block_189_chr_5	rs110844659	rs110389557	116015434	116078264	62830	0.05416	ENSBTAG00000009351	116028707	116169393	ATXN10	protein_coding
5	block_190_chr_5	rs109598646	rs109886869	116114118	116134185	20067	0.0527	ENSBTAG00000009351	116028707	116169393	ATXN10	protein_coding
5	block_33_chr_5	rs41654781	rs41654780	23326993	23360591	33598	0.04635
6	block_177_chr_6	rs109738132	rs41589903	68159201	68192608	33407	0.04759
6	block_274_chr_6	rs43015979	rs109119833	109865079	109902740	37661	0.06951
6	block_28_chr_6	rs42225323	rs29016228	8342803	8368753	25950	0.05879
6	block_41_chr_6	rs110527343	rs42360471	12523570	12550413	26843	0.04503
6	block_4_chr_6	rs110710192	rs41663389	641260	670124	28864	0.0473
7	block_102_chr_7	rs41575808	rs109886610	43085607	43105247	19640	0.05447	ENSBTAG00000047560	43101617	43102879	C2CD4C	protein_coding
7	block_206_chr_7	rs41613284	rs109190810	75350671	75380152	29481	0.04779	ENSBTAG00000050903	75358284	75359460	protein_coding
7	block_233_chr_7	rs41605716	rs41580804	89523902	89546406	22504	0.06248
7	block_77_chr_7	rs110895835	rs110009403	36308740	36336039	27299	0.04584
8	block_11_chr_8	rs42819192	rs42819198	6859755	6884117	24362	0.05041
8	block_229_chr_8	rs41661749	rs42496573	99225810	99256821	31011	0.04736
8	rs29012723_8_chr_	rs29012723	rs29012723	108000794	108000794	1	0.04788
9	rs29012613_9_chr_	rs29012613	rs29012613	19914423	19914423	1	0.04669	ENSBTAG00000012096	19804029	20074759	BCKDHB	protein_coding
10	block_107_chr_10	rs43625164	rs43625187	51595228	51617437	22209	0.04631	ENSBTAG00000005481	51535794	51679258	ADAM10	protein_coding
10	block_220_chr_10	rs110572986	rs109837613	99680118	99710643	30525	0.04595	ENSBTAG00000001124	99667901	99724558	GALC	protein_coding
11	block_50_chr_11	rs110355302	rs109857275	13420056	13474734	54678	0.04555	ENSBTAG00000002105	13428958	13436886	TEX261	protein_coding
11	block_50_chr_11	rs110355302	rs109857275	13420056	13474734	54678	0.04555	ENSBTAG00000010620	13454348	13480401	ATP6V1B1	protein_coding
11	block_50_chr_11	rs110355302	rs109857275	13420056	13474734	54678	0.04555	ENSBTAG00000010623	13434822	13442574	ANKRD53	protein_coding
11	block_89_chr_11	rs43669894	rs41591463	25557367	25580727	23360	0.05217	ENSBTAG00000003555	25515109	25845945	THADA	protein_coding
12	block_20_chr_12	rs110675288	rs41580374	12409614	12443527	33913	0.04709	ENSBTAG00000014752	12410713	12461551	AKAP11	protein_coding
14	block_114_chr_14	rs41737077	rs41737059	30803553	30837616	34063	0.0489	ENSBTAG00000011981	30827578	30862362	MYBL1	protein_coding
14	block_114_chr_14	rs41737077	rs41737059	30803553	30837616	34063	0.0489	ENSBTAG00000053995	30822296	30822402	U6	snRNA
14	block_126_chr_14	rs42382244	rs43089152	38274985	38304478	29493	0.0444	ENSBTAG00000004411	38295064	38345541	CRISPLD1	protein_coding
14	block_25_chr_14	rs109634189	rs110502094	5268069	5299013	30944	0.05388
15	block_131_chr_15	rs41257196	rs41778966	64696473	64756466	59993	0.04475	ENSBTAG00000005923	64746521	64932891	ABTB2	protein_coding
15	block_131_chr_15	rs41257196	rs41778966	64696473	64756466	59993	0.04475	ENSBTAG00000016744	64661600	64697021	CAPRIN1	protein_coding
15	block_131_chr_15	rs41257196	rs41778966	64696473	64756466	59993	0.04475	ENSBTAG00000016747	64702013	64740844	NAT10	protein_coding
16	block_166_chr_16	rs41664179	rs41664177	77631297	77660465	29168	0.05154	ENSBTAG00000023144	77600496	77669271	PTPRC	protein_coding
16	block_166_chr_16	rs41664179	rs41664177	77631297	77660465	29168	0.05154	ENSBTAG00000046345	77633793	77634326	protein_coding
17	block_123_chr_17	rs42948217	rs41843533	57652704	57676485	23781	0.04883	ENSBTAG00000044119	57231745	57664911	KSR2	protein_coding
17	block_162_chr_17	rs110456592	rs41855969	71505929	71528977	23048	0.04465	ENSBTAG00000001325	71518122	71544778	UPB1	protein_coding
17	block_162_chr_17	rs110456592	rs41855969	71505929	71528977	23048	0.04465	ENSBTAG00000021262	71496420	71513527	SNRPD3	protein_coding
17	block_162_chr_17	rs110456592	rs41855969	71505929	71528977	23048	0.04465	ENSBTAG00000022022	71503858	71515630	GUCD1	protein_coding
18	block_115_chr_18	rs109074834	rs41581635	43300251	43332104	31853	0.04955	ENSBTAG00000004864	43316097	43398266	CEP89	protein_coding
18	block_76_chr_18	rs109980096	rs110020608	25602368	25628544	26176	0.04841	ENSBTAG00000038141	25595310	25641535	ADGRG1	protein_coding
19	block_57_chr_19	rs110250279	rs110687354	24678652	24710033	31381	0.04641	ENSBTAG00000016316	24617657	24710635	ZZEF1	protein_coding
19	rs109796698_19_chr_	rs109796698	rs109796698	31862344	31862344	1	0.05041
19	rs41620696_19_chr_	rs41620696	rs41620696	32004132	32004132	1	0.04649
20	block_54_chr_20	rs29012545	rs110149591	26352669	26387100	34431	0.04905
20	block_80_chr_20	rs42543872	rs42543895	38543545	38571692	28147	0.0896	ENSBTAG00000023529	38369475	38572090	SPEF2	protein_coding
20	rs43350564_20_chr_	rs43350564	rs43350564	4709731	4709731	1	0.07259
22	block_97_chr_22	rs41644452	rs42013343	46740639	46762508	21869	0.06015	ENSBTAG00000013117	45924535	46818511	CACNA2D3	protein_coding
23	block_13_chr_23	rs110708312	rs109793138	4861885	4892090	30205	0.05346	ENSBTAG00000025718	4789382	4986934	HMGCLL1	protein_coding
23	block_35_chr_23	rs109152735	rs109130384	15338295	15367501	29206	0.09132	ENSBTAG00000014211	15366276	15417429	FOXP4	protein_coding
24	block_129_chr_24	rs109669425	rs110870395	60126709	60176845	50136	0.04742
24	block_6_chr_24	rs41668379	rs42570102	1921310	1940886	19576	0.04472
26	block_105_chr_26	rs109450346	rs42101711	46765748	46787804	22056	0.05346	ENSBTAG00000031890	46392481	46948728	DOCK1	protein_coding
26	block_110_chr_26	rs110105463	rs111008529	48859017	48880894	21877	0.06542	ENSBTAG00000050386	48818674	49095122	MGMT	protein_coding
27	block_50_chr_27	rs41646744	rs42118731	24839161	24870986	31825	0.07934	ENSBTAG00000015913	24865164	24975150	MFHAS1	protein_coding
27	block_51_chr_27	rs41584803	rs29023022	24976943	25015613	38670	0.0452
27	block_75_chr_27	rs109746481	rs109807388	38303470	38327324	23854	0.04816	ENSBTAG00000001186	38246299	38307830	SH2D4A	protein_coding
27	block_75_chr_27	rs109746481	rs109807388	38303470	38327324	23854	0.04816	ENSBTAG00000036777	38318224	38318340	5S_rRNA	rRNA
29	block_81_chr_29	rs42187697	rs42195887	41157401	41193917	36516	0.05807	ENSBTAG00000013240	41158413	41199503	SLC3A2	protein_coding
29	block_81_chr_29	rs42187697	rs42195887	41157401	41193917	36516	0.05807	ENSBTAG00000042464	41158023	41158092	SNORD25	snoRNA
29	block_81_chr_29	rs42187697	rs42195887	41157401	41193917	36516	0.05807	ENSBTAG00000042479	41157740	41157815	SNORD26	snoRNA
29	block_81_chr_29	rs42187697	rs42195887	41157401	41193917	36516	0.05807	ENSBTAG00000043509	41157390	41157461	SNORD27	snoRNA
29	block_81_chr_29	rs42187697	rs42195887	41157401	41193917	36516	0.05807	ENSBTAG00000050000	41175058	41177115	protein_coding
29	block_81_chr_29	rs42187697	rs42195887	41157401	41193917	36516	0.05807	ENSBTAG00000054053	41155211	41158366	lncRNA
29	rs110643010_29_chr_	rs110643010	rs110643010	36519917	36519917	1	0.05115	ENSBTAG00000010411	36515554	36534251	ADAMTS8	protein_coding
30	block_10_chr_30	rs109907786	rs110047509	138757031	138786335	29304	0.04557	ENSBTAG00000008114	138754709	138785187	CD99	protein_coding
30	block_1_chr_30	rs41579501	rs109285849	133955939	133994990	39051	0.04479
30	block_9_chr_30	rs109460397	rs29016272	138539853	138566171	26318	0.0448	ENSBTAG00000022150	138519497	138540790	MXRA5	protein_coding
QTL overlapped with the top 0.001% markers in percentage of variance explained
Chromosome	Marker	Start_SNP (marker)	END_SNP (marker)	Start_Position (marker)	End_Position (marker)	Size_in_kb(marker)	%Variance_explained	QTL_Type	Start_Position (QTL)	End_Position (QTL)	QTL_ID	Trait_associated	Trait_Abreviation	Breeds_found	Tag_SNP
1	block_132_chr_1	rs43238752	rs41575644	64893868	64920298	26430	0.06783	Reproduction	64893866	64893870	QTL_ID=21147	trait=Age_at_puberty	Abbrev=PUBAGE	breed=holstein	rs42462826
1	block_132_chr_1	rs43238752	rs41575644	64893868	64920298	26430	0.06783	Reproduction	64893866	64893870	QTL_ID=29831	trait=Age_at_puberty	Abbrev=PUBAGE	breed=holstein	rs41633081
1	block_132_chr_1	rs43238752	rs41575644	64893868	64920298	26430	0.06783	Reproduction	64920296	64920300	QTL_ID=29833	trait=Age_at_puberty	Abbrev=PUBAGE	breed=holstein	rs29019349
2	block_90_chr_2	rs43303189	rs43302650	33265910	33302435	36525	0.05756	Milk	33302433	33302437	QTL_ID=32557	trait=Milk_myristoleic_acid_content	Abbrev=MFA-C14:1	breed=holstein	rs41582008
3	block_83_chr_3	rs43339412	rs43712305	48234094	48259870	25776	0.05625	Production	48234092	48234096	QTL_ID=164356	trait=Body_weight_(birth)	Abbrev=BW	breed=holstein	rs41596889
3	block_122_chr_3	rs42867969	rs43702513	64213749	64239387	25638	0.04828	Milk	.	.	QTL_ID=2443	trait=Milk_protein_percentage	Abbrev=PP	breed=nelore	rs43702513
3	block_122_chr_3	rs42867969	rs43702513	64213749	64239387	25638	0.04828	Production	64239385	64239389	QTL_ID=66997	trait=Body_weight_gain	Abbrev=BWG	breed=holstein	rs42862819
3	block_270_chr_3	rs110656886	rs42460993	113880893	113901073	20180	0.04966	Milk	113884234	113884238	QTL_ID=64006	trait=Milk_riboflavin_content	Abbrev=RIBO	breed=holstein	rs41649818,rs29011657
3	block_270_chr_3	rs110656886	rs42460993	113880893	113901073	20180	0.04966	Milk	113889410	113889414	QTL_ID=64007	trait=Milk_riboflavin_content	Abbrev=RIBO	breed=holstein	rs134458891,rs136801407
4	block_133_chr_4	rs43402375	rs43400956	61247646	61322228	74582	0.04438	Production	61322226	61322230	QTL_ID=24712	trait=Body_weight_(weaning)	Abbrev=WWT	breed=holstein	rs434336014
4	block_133_chr_4	rs43402375	rs43400956	61247646	61322228	74582	0.04438	Production	61322226	61322230	QTL_ID=24781	trait=Body_weight_(yearling)	Abbrev=W365	breed=German_Black_Pied	rs29012226
5	block_33_chr_5	rs41654781	rs41654780	23326993	23360591	33598	0.04635	Health	23360589	23360593	QTL_ID=160062	trait=Bovine_respiratory_disease_susceptibility	Abbrev=BRDS	breed=brahman	rs109856607
5	block_190_chr_5	rs109598646	rs109886869	116114118	116134185	20067	0.0527	Milk	116134183	116134187	QTL_ID=32345	trait=Milk_delta-9-desaturase_content	Abbrev=D9D	breed=charolais,gelbvieh,hereford,limousin,pinzgauer,red_angus,red_poll,simmental,Angus	rs209727589
6	block_4_chr_6	rs110710192	rs41663389	641260	670124	28864	0.0473	Exterior	641258	641262	QTL_ID=41728	trait=Feet_and_leg_conformation	Abbrev=FTLEG	breed=Angus	rs135314769
6	block_4_chr_6	rs110710192	rs41663389	641260	670124	28864	0.0473	Exterior	641258	641262	QTL_ID=41731	trait=Teat_placement_-_front	Abbrev=FTPL	breed=gelbvieh	rs135411900
6	block_4_chr_6	rs110710192	rs41663389	641260	670124	28864	0.0473	Exterior	641258	641262	QTL_ID=41732	trait=Udder_attachment	Abbrev=UA	breed=gelbvieh	rs135640023
6	block_4_chr_6	rs110710192	rs41663389	641260	670124	28864	0.0473	Exterior	641258	641262	QTL_ID=41737	trait=Rear_leg_placement_-_rear_view	Abbrev=RLEGR	breed=gelbvieh	rs136137849
6	block_4_chr_6	rs110710192	rs41663389	641260	670124	28864	0.0473	Exterior	641258	641262	QTL_ID=41738	trait=Teat_placement_-_rear	Abbrev=RTPL	breed=charolais,gelbvieh,hereford,limousin,pinzgauer,red_angus,red_poll,simmental,Angus	rs136190942
6	block_4_chr_6	rs110710192	rs41663389	641260	670124	28864	0.0473	Exterior	641258	641262	QTL_ID=41739	trait=Udder_height	Abbrev=UHT	breed=charolais,gelbvieh,hereford,limousin,pinzgauer,red_angus,red_poll,simmental,Angus	rs136257809
6	block_4_chr_6	rs110710192	rs41663389	641260	670124	28864	0.0473	Exterior	641258	641262	QTL_ID=41741	trait=Stature	Abbrev=STA	breed=charolais,gelbvieh,hereford,limousin,pinzgauer,red_angus,red_poll,simmental,Angus	rs136413048
6	block_4_chr_6	rs110710192	rs41663389	641260	670124	28864	0.0473	Exterior	641258	641262	QTL_ID=41742	trait=Strength	Abbrev=STR	breed=charolais,gelbvieh,hereford,limousin,pinzgauer,red_angus,red_poll,simmental,Angus	rs136416413
6	block_4_chr_6	rs110710192	rs41663389	641260	670124	28864	0.0473	Exterior	641258	641262	QTL_ID=41743	trait=Udder_depth	Abbrev=UDPTH	breed=Girolando	rs136523990
6	block_4_chr_6	rs110710192	rs41663389	641260	670124	28864	0.0473	Milk	641258	641262	QTL_ID=41729	trait=Milk_fat_percentage	Abbrev=FP	breed=holstein	rs135384060
6	block_4_chr_6	rs110710192	rs41663389	641260	670124	28864	0.0473	Milk	641258	641262	QTL_ID=41733	trait=Milk_fat_yield	Abbrev=FY	breed=charolais,gelbvieh,hereford,limousin,pinzgauer,red_angus,red_poll,simmental,Angus	rs135680544
6	block_4_chr_6	rs110710192	rs41663389	641260	670124	28864	0.0473	Milk	641258	641262	QTL_ID=41735	trait=Milk_protein_percentage	Abbrev=PP	breed=holstein	rs135922395
6	block_4_chr_6	rs110710192	rs41663389	641260	670124	28864	0.0473	Milk	641258	641262	QTL_ID=41736	trait=Milk_protein_yield	Abbrev=PY	breed=gelbvieh	rs135937048
6	block_4_chr_6	rs110710192	rs41663389	641260	670124	28864	0.0473	Production	641258	641262	QTL_ID=41726	trait=Body_depth	Abbrev=BD	breed=Hanwoo	rs135125616
6	block_4_chr_6	rs110710192	rs41663389	641260	670124	28864	0.0473	Production	641258	641262	QTL_ID=41730	trait=PTA_type	Abbrev=PTAT	breed=Angus	rs135400595
6	block_4_chr_6	rs110710192	rs41663389	641260	670124	28864	0.0473	Production	641258	641262	QTL_ID=41734	trait=Net_merit	Abbrev=NM	breed=charolais,gelbvieh,hereford,limousin,pinzgauer,red_angus,red_poll,simmental,Angus	rs135688682
6	block_4_chr_6	rs110710192	rs41663389	641260	670124	28864	0.0473	Production	641258	641262	QTL_ID=41740	trait=Rump_width	Abbrev=RUMWD	breed=charolais,gelbvieh,hereford,limousin,pinzgauer,red_angus,red_poll,simmental,Angus	rs136283820
6	block_4_chr_6	rs110710192	rs41663389	641260	670124	28864	0.0473	Reproduction	641258	641262	QTL_ID=41727	trait=Calving_ease_(maternal)	Abbrev=CALEASE	breed=brangus	rs135147861
6	block_41_chr_6	rs110527343	rs42360471	12523570	12550413	26843	0.04503	Production	12548295	12548299	QTL_ID=167101	trait=Average_daily_gain	Abbrev=ADG	breed=charolais,gelbvieh,hereford,limousin,simmental,Angus	rs134628626
6	block_41_chr_6	rs110527343	rs42360471	12523570	12550413	26843	0.04503	Production	12550411	12550415	QTL_ID=67657	trait=Body_weight_(yearling)	Abbrev=W365	breed=charolais,gelbvieh,hereford,limousin,simmental,Angus	rs135790715
6	block_177_chr_6	rs109738132	rs41589903	68159201	68192608	33407	0.04759	Exterior	68159199	68159203	QTL_ID=37348	trait=Eye_area_pigmentation	Abbrev=EYEAP	breed=holstein	rs43703013
6	block_177_chr_6	rs109738132	rs41589903	68159201	68192608	33407	0.04759	Exterior	68159199	68159203	QTL_ID=37364	trait=Facial_pigmentation	Abbrev=FPIGMT	breed=holstein	rs43703013
6	block_177_chr_6	rs109738132	rs41589903	68159201	68192608	33407	0.04759	Exterior	68192606	68192610	QTL_ID=37349	trait=Eye_area_pigmentation	Abbrev=EYEAP	breed=holstein	rs43703013
6	block_177_chr_6	rs109738132	rs41589903	68159201	68192608	33407	0.04759	Exterior	68192606	68192610	QTL_ID=37365	trait=Facial_pigmentation	Abbrev=FPIGMT	breed=holstein	rs43703013
6	block_274_chr_6	rs43015979	rs109119833	109865079	109902740	37661	0.06951	Milk	109878338	109878342	QTL_ID=119123	trait=Milk_unglycosylated_kappa-casein_percentage	Abbrev=MUGKCASP	breed=holstein	rs41578582
7	block_102_chr_7	rs41575808	rs109886610	43085607	43105247	19640	0.05447	Milk	43085605	43085609	QTL_ID=157531	trait=Milking_speed	Abbrev=MSPD	breed=holstein	rs41611219
7	block_233_chr_7	rs41605716	rs41580804	89523902	89546406	22504	0.06248	Exterior	89523900	89523904	QTL_ID=43369	trait=Dairy_form	Abbrev=DYF	breed=brahman	rs29025644,rs110378393
7	block_233_chr_7	rs41605716	rs41580804	89523902	89546406	22504	0.06248	Exterior	89523900	89523904	QTL_ID=43370	trait=Feet_and_leg_conformation	Abbrev=FTLEG	breed=charolais,chianina,gelbvieh,hereford,holstein,limousin,piedmontese,red_angus,simmental,Angus,Maine-Anjou	rs43643999,rs109559045
7	block_233_chr_7	rs41605716	rs41580804	89523902	89546406	22504	0.06248	Exterior	89523900	89523904	QTL_ID=43372	trait=Teat_placement_-_front	Abbrev=FTPL	breed=holstein	rs41656867,rs109989268
7	block_233_chr_7	rs41605716	rs41580804	89523902	89546406	22504	0.06248	Exterior	89523900	89523904	QTL_ID=43373	trait=Udder_attachment	Abbrev=UA	breed=holstein	rs43642998,rs43650173
7	block_233_chr_7	rs41605716	rs41580804	89523902	89546406	22504	0.06248	Exterior	89523900	89523904	QTL_ID=43374	trait=Rear_leg_placement_-_rear_view	Abbrev=RLEGR	breed=holstein	rs109914287,rs43650187
7	block_233_chr_7	rs41605716	rs41580804	89523902	89546406	22504	0.06248	Exterior	89523900	89523904	QTL_ID=43375	trait=Teat_placement_-_rear	Abbrev=RTPL	breed=charolais,chianina,gelbvieh,hereford,holstein,limousin,piedmontese,red_angus,simmental,Angus,Maine-Anjou	rs110179938,rs110169119
7	block_233_chr_7	rs41605716	rs41580804	89523902	89546406	22504	0.06248	Exterior	89523900	89523904	QTL_ID=43376	trait=Udder_height	Abbrev=UHT	breed=charolais,gelbvieh,hereford,limousin,pinzgauer,red_angus,red_poll,simmental,Angus	rs110201865,rs110056495
7	block_233_chr_7	rs41605716	rs41580804	89523902	89546406	22504	0.06248	Exterior	89523900	89523904	QTL_ID=43378	trait=Stature	Abbrev=STA	breed=charolais,gelbvieh,hereford,limousin,pinzgauer,red_angus,red_poll,simmental,Angus	rs43642675,rs43643308
7	block_233_chr_7	rs41605716	rs41580804	89523902	89546406	22504	0.06248	Exterior	89523900	89523904	QTL_ID=43379	trait=Strength	Abbrev=STR	breed=charolais,gelbvieh,hereford,limousin,pinzgauer,red_angus,red_poll,simmental,Angus	rs41593885,rs110566925
7	block_233_chr_7	rs41605716	rs41580804	89523902	89546406	22504	0.06248	Exterior	89523900	89523904	QTL_ID=43380	trait=Udder_cleft	Abbrev=UC	breed=holstein	rs43647828,rs42868836
7	block_233_chr_7	rs41605716	rs41580804	89523902	89546406	22504	0.06248	Exterior	89523900	89523904	QTL_ID=43381	trait=Udder_depth	Abbrev=UDPTH	breed=holstein	rs110584450,rs109103352
7	block_233_chr_7	rs41605716	rs41580804	89523902	89546406	22504	0.06248	Exterior	89546404	89546408	QTL_ID=43383	trait=Dairy_form	Abbrev=DYF	breed=holstein	rs132960291,rs110702652,rs136362611
7	block_233_chr_7	rs41605716	rs41580804	89523902	89546406	22504	0.06248	Exterior	89546404	89546408	QTL_ID=43384	trait=Feet_and_leg_conformation	Abbrev=FTLEG	breed=charolais,gelbvieh,hereford,limousin,pinzgauer,red_angus,red_poll,simmental,Angus	rs132960291,rs110702652,rs136362611
7	block_233_chr_7	rs41605716	rs41580804	89523902	89546406	22504	0.06248	Exterior	89546404	89546408	QTL_ID=43386	trait=Teat_placement_-_front	Abbrev=FTPL	breed=ayrshire,danish_red,holstein,jersey,norwegian_red,Swedish_Red-and-White	rs43619255,rs41655411,rs43614585
7	block_233_chr_7	rs41605716	rs41580804	89523902	89546406	22504	0.06248	Exterior	89546404	89546408	QTL_ID=43387	trait=Udder_attachment	Abbrev=UA	breed=holstein	rs135198463,rs41597142,rs136081666
7	block_233_chr_7	rs41605716	rs41580804	89523902	89546406	22504	0.06248	Exterior	89546404	89546408	QTL_ID=43388	trait=Rear_leg_placement_-_rear_view	Abbrev=RLEGR	breed=holstein	rs109898540
7	block_233_chr_7	rs41605716	rs41580804	89523902	89546406	22504	0.06248	Exterior	89546404	89546408	QTL_ID=43389	trait=Teat_placement_-_rear	Abbrev=RTPL	breed=holstein	rs109755494
7	block_233_chr_7	rs41605716	rs41580804	89523902	89546406	22504	0.06248	Exterior	89546404	89546408	QTL_ID=43390	trait=Udder_height	Abbrev=UHT	breed=holstein	rs109220955
7	block_233_chr_7	rs41605716	rs41580804	89523902	89546406	22504	0.06248	Exterior	89546404	89546408	QTL_ID=43392	trait=Stature	Abbrev=STA	breed=holstein	rs29022040
7	block_233_chr_7	rs41605716	rs41580804	89523902	89546406	22504	0.06248	Exterior	89546404	89546408	QTL_ID=43393	trait=Strength	Abbrev=STR	breed=holstein	rs137826123
7	block_233_chr_7	rs41605716	rs41580804	89523902	89546406	22504	0.06248	Exterior	89546404	89546408	QTL_ID=43394	trait=Udder_cleft	Abbrev=UC	breed=brahman	rs133252628
7	block_233_chr_7	rs41605716	rs41580804	89523902	89546406	22504	0.06248	Exterior	89546404	89546408	QTL_ID=43395	trait=Udder_depth	Abbrev=UDPTH	breed=brahman	rs137713131
7	block_233_chr_7	rs41605716	rs41580804	89523902	89546406	22504	0.06248	Production	89523900	89523904	QTL_ID=43368	trait=Body_depth	Abbrev=BD	breed=blonde_d'aquitaine	rs42802606,rs41656325
7	block_233_chr_7	rs41605716	rs41580804	89523902	89546406	22504	0.06248	Production	89523900	89523904	QTL_ID=43371	trait=PTA_type	Abbrev=PTAT	breed=charolais,chianina,gelbvieh,hereford,holstein,limousin,piedmontese,red_angus,simmental,Angus,Maine-Anjou	rs43642952,rs43637279
7	block_233_chr_7	rs41605716	rs41580804	89523902	89546406	22504	0.06248	Production	89523900	89523904	QTL_ID=43377	trait=Rump_width	Abbrev=RUMWD	breed=Angus	rs110838923,rs41594273
7	block_233_chr_7	rs41605716	rs41580804	89523902	89546406	22504	0.06248	Production	89546404	89546408	QTL_ID=43382	trait=Body_depth	Abbrev=BD	breed=holstein	rs43643837,rs42868892
7	block_233_chr_7	rs41605716	rs41580804	89523902	89546406	22504	0.06248	Production	89546404	89546408	QTL_ID=43385	trait=PTA_type	Abbrev=PTAT	breed=holstein	rs43619255,rs41655411,rs43614585
7	block_233_chr_7	rs41605716	rs41580804	89523902	89546406	22504	0.06248	Production	89546404	89546408	QTL_ID=43391	trait=Rump_width	Abbrev=RUMWD	breed=holstein	rs137527434
10	block_220_chr_10	rs110572986	rs109837613	99680118	99710643	30525	0.04595	Production	99706895	99706899	QTL_ID=65486	trait=Maturity_rate	Abbrev=MATRATE	breed=holstein	rs133460908
11	block_89_chr_11	rs43669894	rs41591463	25557367	25580727	23360	0.05217	Reproduction	25557365	25557369	QTL_ID=106980	trait=Daughter_pregnancy_rate	Abbrev=DPR	breed=holstein	rs110783012
11	block_89_chr_11	rs43669894	rs41591463	25557367	25580727	23360	0.05217	Reproduction	25557365	25557369	QTL_ID=107136	trait=Conception_rate	Abbrev=CONCRATE	breed=holstein	rs109747867
14	block_25_chr_14	rs109634189	rs110502094	5268069	5299013	30944	0.05388	Milk	5268067	5268071	QTL_ID=27090	trait=Milk_fat_percentage	Abbrev=FP	breed=canchim	rs134711585
14	block_25_chr_14	rs109634189	rs110502094	5268069	5299013	30944	0.05388	Milk	5277630	5277634	QTL_ID=33590	trait=Milk_fat_percentage	Abbrev=FP	breed=Wagyu	rs133041862
14	block_25_chr_14	rs109634189	rs110502094	5268069	5299013	30944	0.05388	Milk	5282481	5282485	QTL_ID=33591	trait=Milk_fat_percentage	Abbrev=FP	breed=brahman	rs111018678
14	block_25_chr_14	rs109634189	rs110502094	5268069	5299013	30944	0.05388	Milk	5283455	5283459	QTL_ID=33592	trait=Milk_fat_percentage	Abbrev=FP	breed=holstein	rs111018678
14	block_25_chr_14	rs109634189	rs110502094	5268069	5299013	30944	0.05388	Milk	5284958	5284962	QTL_ID=33593	trait=Milk_fat_percentage	Abbrev=FP	breed=brahman	rs111018678
14	block_25_chr_14	rs109634189	rs110502094	5268069	5299013	30944	0.05388	Milk	5294936	5294940	QTL_ID=200486	trait=Milk_palmitic_acid_content	Abbrev=MFA-C16:0	breed=holstein	rs110752007
14	block_25_chr_14	rs109634189	rs110502094	5268069	5299013	30944	0.05388	Milk	5294936	5294940	QTL_ID=205641	trait=Milk_palmitoleic_acid_content	Abbrev=MFA-C16:1	breed=holstein	rs133125476
14	block_25_chr_14	rs109634189	rs110502094	5268069	5299013	30944	0.05388	Milk	5294936	5294940	QTL_ID=205642	trait=Milk_oleic_acid_content	Abbrev=MFA-C18:1	breed=holstein	rs110544489
14	block_25_chr_14	rs109634189	rs110502094	5268069	5299013	30944	0.05388	Milk	5294936	5294940	QTL_ID=205643	trait=Milk_linoleic_acid_content	Abbrev=MFA-C18:2	breed=holstein	rs137428346
14	block_25_chr_14	rs109634189	rs110502094	5268069	5299013	30944	0.05388	Milk	5294936	5294940	QTL_ID=205644	trait=Milk_linolenic_acid_content	Abbrev=MFA-C18:3n3	breed=holstein	rs41625651
14	block_25_chr_14	rs109634189	rs110502094	5268069	5299013	30944	0.05388	Milk	5294936	5294940	QTL_ID=205645	trait=Milk_caprylic_acid_content	Abbrev=MFA-C8:0	breed=holstein	rs41572919
14	block_25_chr_14	rs109634189	rs110502094	5268069	5299013	30944	0.05388	Milk	5294936	5294940	QTL_ID=33759	trait=Milk_fat_percentage	Abbrev=FP	breed=brahman	rs134216943
14	block_25_chr_14	rs109634189	rs110502094	5268069	5299013	30944	0.05388	Milk	5298719	5298723	QTL_ID=23204	trait=Milk_vitamin_B-12_content	Abbrev=MVB12	breed=brahman	rs134216943
14	block_25_chr_14	rs109634189	rs110502094	5268069	5299013	30944	0.05388	Milk	5299011	5299015	QTL_ID=14991	trait=Milk_fat_percentage	Abbrev=FP	breed=holstein	rs136480876
14	block_25_chr_14	rs109634189	rs110502094	5268069	5299013	30944	0.05388	Milk	5299011	5299015	QTL_ID=161733	trait=Milk_fat_percentage	Abbrev=FP	breed=holstein	rs110828423
14	block_25_chr_14	rs109634189	rs110502094	5268069	5299013	30944	0.05388	Milk	5299011	5299015	QTL_ID=173725	trait=Milk_fat_percentage	Abbrev=FP	breed=brown_swiss	rs109086264
14	block_25_chr_14	rs109634189	rs110502094	5268069	5299013	30944	0.05388	Milk	5299011	5299015	QTL_ID=25571	trait=Milk_yield	Abbrev=MY	breed=holstein	rs109773526
14	block_25_chr_14	rs109634189	rs110502094	5268069	5299013	30944	0.05388	Milk	5299011	5299015	QTL_ID=25985	trait=Milk_fat_yield	Abbrev=FY	breed=charolais,gelbvieh,hereford,limousin,pinzgauer,red_angus,red_poll,simmental,Angus	rs385094052
14	block_25_chr_14	rs109634189	rs110502094	5268069	5299013	30944	0.05388	Milk	5299011	5299015	QTL_ID=26607	trait=Milk_fat_percentage	Abbrev=FP	breed=holstein	rs109059743
14	block_25_chr_14	rs109634189	rs110502094	5268069	5299013	30944	0.05388	Milk	5299011	5299015	QTL_ID=35367	trait=Milk_fat_yield	Abbrev=FY	breed=brahman	rs134216943
14	block_25_chr_14	rs109634189	rs110502094	5268069	5299013	30944	0.05388	Milk	5299011	5299015	QTL_ID=35573	trait=Milk_fat_percentage	Abbrev=FP	breed=jersey,limousin	rs134216943
14	block_25_chr_14	rs109634189	rs110502094	5268069	5299013	30944	0.05388	Reproduction	5268067	5268071	QTL_ID=24605	trait=Calving_ease	Abbrev=CALEASE	breed=Hanwoo	rs132697104
14	block_114_chr_14	rs41737077	rs41737059	30803553	30837616	34063	0.0489	Milk	30837614	30837618	QTL_ID=158047	trait=Milking_speed	Abbrev=MSPD	breed=holstein	rs110571385
15	block_131_chr_15	rs41257196	rs41778966	64696473	64756466	59993	0.04475	Milk	64696471	64696475	QTL_ID=174291	trait=Milk_fat_yield	Abbrev=FY	breed=holstein	rs109599951
15	block_131_chr_15	rs41257196	rs41778966	64696473	64756466	59993	0.04475	Milk	64730071	64730075	QTL_ID=174292	trait=Milk_fat_yield	Abbrev=FY	breed=nelore	rs110199147
15	block_131_chr_15	rs41257196	rs41778966	64696473	64756466	59993	0.04475	Production	64696471	64696475	QTL_ID=68759	trait=Body_weight_gain	Abbrev=BWG	breed=holstein	rs478287397
17	block_162_chr_17	rs110456592	rs41855969	71505929	71528977	23048	0.04465	Reproduction	71505927	71505931	QTL_ID=31069	trait=Fertility_index	Abbrev=FERIND	breed=holstein	rs41577620
17	block_162_chr_17	rs110456592	rs41855969	71505929	71528977	23048	0.04465	Reproduction	71525006	71525010	QTL_ID=140959	trait=Non-return_rate	Abbrev=NRR	breed=holstein	rs208645216,rs41919985
17	block_162_chr_17	rs110456592	rs41855969	71505929	71528977	23048	0.04465	Reproduction	71525006	71525010	QTL_ID=142471	trait=Non-return_rate	Abbrev=NRR	breed=holstein	rs208645216,rs41919985
17	block_162_chr_17	rs110456592	rs41855969	71505929	71528977	23048	0.04465	Reproduction	71528391	71528395	QTL_ID=140964	trait=Non-return_rate	Abbrev=NRR	breed=nelore	rs109863510
17	block_162_chr_17	rs110456592	rs41855969	71505929	71528977	23048	0.04465	Reproduction	71528391	71528395	QTL_ID=142469	trait=Non-return_rate	Abbrev=NRR	breed=holstein	rs110514489
18	block_115_chr_18	rs109074834	rs41581635	43300251	43332104	31853	0.04955	Exterior	43332102	43332106	QTL_ID=49619	trait=Dairy_form	Abbrev=DYF	breed=holstein	rs41946281
18	block_115_chr_18	rs109074834	rs41581635	43300251	43332104	31853	0.04955	Exterior	43332102	43332106	QTL_ID=49627	trait=Udder_depth	Abbrev=UDPTH	breed=holstein	rs29013720
18	block_115_chr_18	rs109074834	rs41581635	43300251	43332104	31853	0.04955	Health	43332102	43332106	QTL_ID=49625	trait=Somatic_cell_score	Abbrev=SCS	breed=holstein	rs41939408
18	block_115_chr_18	rs109074834	rs41581635	43300251	43332104	31853	0.04955	Production	43316321	43316325	QTL_ID=193757	trait=Body_weight_(birth)	Abbrev=BW	breed=holstein	rs29022980
18	block_115_chr_18	rs109074834	rs41581635	43300251	43332104	31853	0.04955	Production	43332102	43332106	QTL_ID=49622	trait=Net_merit	Abbrev=NM	breed=holstein	rs41939339
18	block_115_chr_18	rs109074834	rs41581635	43300251	43332104	31853	0.04955	Production	43332102	43332106	QTL_ID=49623	trait=Length_of_productive_life	Abbrev=PL	breed=holstein	rs41939374
18	block_115_chr_18	rs109074834	rs41581635	43300251	43332104	31853	0.04955	Reproduction	43332102	43332106	QTL_ID=49618	trait=Calving_ease_(maternal)	Abbrev=CALEASE	breed=holstein	rs136249812
18	block_115_chr_18	rs109074834	rs41581635	43300251	43332104	31853	0.04955	Reproduction	43332102	43332106	QTL_ID=49620	trait=Daughter_pregnancy_rate	Abbrev=DPR	breed=holstein	rs137431035
18	block_115_chr_18	rs109074834	rs41581635	43300251	43332104	31853	0.04955	Reproduction	43332102	43332106	QTL_ID=49621	trait=Stillbirth_(maternal)	Abbrev=SB	breed=holstein	rs41938472
18	block_115_chr_18	rs109074834	rs41581635	43300251	43332104	31853	0.04955	Reproduction	43332102	43332106	QTL_ID=49624	trait=Calving_ease	Abbrev=CALEASE	breed=holstein	rs135627903
18	block_115_chr_18	rs109074834	rs41581635	43300251	43332104	31853	0.04955	Reproduction	43332102	43332106	QTL_ID=49626	trait=Stillbirth	Abbrev=SB	breed=holstein	rs136460340
19	rs109796698_19_chr_	rs109796698	rs109796698	31862344	31862344	1	0.05041	Reproduction	31862342	31862346	QTL_ID=15493	trait=Gestation_length	Abbrev=GLENGTH	breed=holstein	rs110811379
19	rs109796698_19_chr_	rs109796698	rs109796698	31862344	31862344	1	0.05041	Reproduction	31862342	31862346	QTL_ID=15494	trait=Gestation_length	Abbrev=GLENGTH	breed=holstein	rs41948991
20	rs43350564_20_chr_	rs43350564	rs43350564	4709731	4709731	1	0.07259	Exterior	4709729	4709733	QTL_ID=50404	trait=Feet_and_leg_conformation	Abbrev=FTLEG	breed=holstein	rs136574946
20	rs43350564_20_chr_	rs43350564	rs43350564	4709731	4709731	1	0.07259	Exterior	4709729	4709733	QTL_ID=50406	trait=Teat_placement_-_front	Abbrev=FTPL	breed=holstein	rs132888075
20	rs43350564	rs43350564	rs43350564	4709731	4709731	1	0.07259	Exterior	4709729	4709733	QTL_ID=50407	trait=Udder_attachment	Abbrev=UA	breed=holstein	rs135995007
20	rs43350564	rs43350564	rs43350564	4709731	4709731	1	0.07259	Exterior	4709729	4709733	QTL_ID=50409	trait=Teat_placement_-_rear	Abbrev=RTPL	breed=holstein	rs134340615
20	rs43350564	rs43350564	rs43350564	4709731	4709731	1	0.07259	Exterior	4709729	4709733	QTL_ID=50413	trait=Stature	Abbrev=STA	breed=braunvieh,holstein,jersey,normande,norwegian_red,Fleckvieh,Montbéliarde,Australian_Red	rs135416871
20	rs43350564	rs43350564	rs43350564	4709731	4709731	1	0.07259	Exterior	4709729	4709733	QTL_ID=50414	trait=Strength	Abbrev=STR	breed=holstein	rs133457830
20	rs43350564	rs43350564	rs43350564	4709731	4709731	1	0.07259	Exterior	4709729	4709733	QTL_ID=50415	trait=Teat_length	Abbrev=TLGTH	breed=jersey	rs135208296
20	rs43350564	rs43350564	rs43350564	4709731	4709731	1	0.07259	Exterior	4709729	4709733	QTL_ID=50416	trait=Udder_cleft	Abbrev=UC	breed=holstein	rs132852832
20	rs43350564	rs43350564	rs43350564	4709731	4709731	1	0.07259	Exterior	4709729	4709733	QTL_ID=50417	trait=Udder_depth	Abbrev=UDPTH	breed=holstein	rs134471789
20	rs43350564	rs43350564	rs43350564	4709731	4709731	1	0.07259	Health	4709729	4709733	QTL_ID=50412	trait=Somatic_cell_score	Abbrev=SCS	breed=holstein	rs211333797
20	rs43350564	rs43350564	rs43350564	4709731	4709731	1	0.07259	Production	4709729	4709733	QTL_ID=164127	trait=Body_weight_(weaning)	Abbrev=WWT	breed=holstein	rs385551988
20	rs43350564	rs43350564	rs43350564	4709731	4709731	1	0.07259	Production	4709729	4709733	QTL_ID=164206	trait=Body_weight_(yearling)	Abbrev=W365	breed=jersey	rs136073509
20	rs43350564	rs43350564	rs43350564	4709731	4709731	1	0.07259	Production	4709729	4709733	QTL_ID=164416	trait=Body_weight_(birth)	Abbrev=BW	breed=jersey	rs209178266
20	rs43350564	rs43350564	rs43350564	4709731	4709731	1	0.07259	Production	4709729	4709733	QTL_ID=164436	trait=Body_weight_(weaning)	Abbrev=WWT	breed=Angus	rs136638907
20	rs43350564	rs43350564	rs43350564	4709731	4709731	1	0.07259	Production	4709729	4709733	QTL_ID=164476	trait=Average_daily_gain	Abbrev=ADG	breed=holstein	rs379843779
20	rs43350564	rs43350564	rs43350564	4709731	4709731	1	0.07259	Production	4709729	4709733	QTL_ID=164535	trait=Body_weight_(yearling)	Abbrev=W365	breed=jersey	rs379127502
20	rs43350564	rs43350564	rs43350564	4709731	4709731	1	0.07259	Production	4709729	4709733	QTL_ID=176528	trait=Body_weight_(birth)	Abbrev=BW	breed=holstein	rs110354299
20	rs43350564	rs43350564	rs43350564	4709731	4709731	1	0.07259	Production	4709729	4709733	QTL_ID=186241	trait=Average_daily_gain	Abbrev=ADG	breed=holstein	rs133774342
20	rs43350564	rs43350564	rs43350564	4709731	4709731	1	0.07259	Production	4709729	4709733	QTL_ID=190174	trait=Metabolic_body_weight	Abbrev=MBW	breed=holstein	rs133204718
20	rs43350564	rs43350564	rs43350564	4709731	4709731	1	0.07259	Production	4709729	4709733	QTL_ID=50405	trait=PTA_type	Abbrev=PTAT	breed=holstein	rs137420632
20	rs43350564	rs43350564	rs43350564	4709731	4709731	1	0.07259	Production	4709729	4709733	QTL_ID=50408	trait=Length_of_productive_life	Abbrev=PL	breed=holstein	rs209318724
20	rs43350564	rs43350564	rs43350564	4709731	4709731	1	0.07259	Production	4709729	4709733	QTL_ID=50410	trait=Rump_width	Abbrev=RUMWD	breed=holstein	rs137010570
20	rs43350564	rs43350564	rs43350564	4709731	4709731	1	0.07259	Production	4709729	4709733	QTL_ID=66693	trait=Body_weight_(birth)	Abbrev=BW	breed=holstein	rs135280215
20	rs43350564	rs43350564	rs43350564	4709731	4709731	1	0.07259	Reproduction	4709729	4709733	QTL_ID=50403	trait=Calving_ease_(maternal)	Abbrev=CALEASE	breed=nelore	rs134074459
20	rs43350564	rs43350564	rs43350564	4709731	4709731	1	0.07259	Reproduction	4709729	4709733	QTL_ID=50411	trait=Calving_ease	Abbrev=CALEASE	breed=holstein	rs384903793
23	block_13_chr_23	rs110708312	rs109793138	4861885	4892090	30205	0.05346	Production	4861883	4861887	QTL_ID=157031	trait=Body_weight_(yearling)	Abbrev=W365	breed=brown_swiss	rs109199086
23	block_13_chr_23	rs110708312	rs109793138	4861885	4892090	30205	0.05346	Production	4892088	4892092	QTL_ID=157030	trait=Body_weight_(yearling)	Abbrev=W365	breed=brown_swiss	rs109176259
23	block_13_chr_23	rs110708312	rs109793138	4861885	4892090	30205	0.05346	Reproduction	4861883	4861887	QTL_ID=14785	trait=Fertility_treatments	Abbrev=FERTRT	breed=ayrshire,danish_red,Swedish_Red-and-White	rs42086574
23	block_35_chr_23	rs109152735	rs109130384	15338295	15367501	29206	0.09132	Production	15338293	15338297	QTL_ID=65985	trait=Body_weight	Abbrev=BW	breed=holstein	rs135126068
24	block_6_chr_24	rs41668379	rs42570102	1921310	1940886	19576	0.04472	Exterior	1921308	1921312	QTL_ID=28176	trait=Udder_structure	Abbrev=udder	breed=charolais,chianina,gelbvieh,hereford,holstein,limousin,piedmontese,red_angus,simmental,Angus,Maine-Anjou	rs110375792
24	block_6_chr_24	rs41668379	rs42570102	1921310	1940886	19576	0.04472	Exterior	1940884	1940888	QTL_ID=52253	trait=Dairy_form	Abbrev=DYF	breed=ayrshire,danish_red,Swedish_Red-and-White	rs136788107
24	block_6_chr_24	rs41668379	rs42570102	1921310	1940886	19576	0.04472	Exterior	1940884	1940888	QTL_ID=52255	trait=Foot_angle	Abbrev=FANG	breed=Angus	rs136788107
24	block_6_chr_24	rs41668379	rs42570102	1921310	1940886	19576	0.04472	Exterior	1940884	1940888	QTL_ID=52259	trait=Rear_leg_placement_-_side_view	Abbrev=RLEGS	breed=holstein	rs133899835
24	block_6_chr_24	rs41668379	rs42570102	1921310	1940886	19576	0.04472	Milk	1921308	1921312	QTL_ID=32336	trait=Milk_conjugated_linoleic_acid_content	Abbrev=CLAC18:2	breed=charolais,chianina,gelbvieh,hereford,holstein,limousin,piedmontese,red_angus,simmental,Angus,Maine-Anjou	rs136788107
24	block_6_chr_24	rs41668379	rs42570102	1921310	1940886	19576	0.04472	Milk	1940884	1940888	QTL_ID=52258	trait=Milk_protein_percentage	Abbrev=PP	breed=charolais,gelbvieh,hereford,limousin,pinzgauer,red_angus,red_poll,simmental,Angus	rs133899835
24	block_6_chr_24	rs41668379	rs42570102	1921310	1940886	19576	0.04472	Production	1940884	1940888	QTL_ID=52256	trait=Net_merit	Abbrev=NM	breed=German_Black_Pied	rs110375792
24	block_6_chr_24	rs41668379	rs42570102	1921310	1940886	19576	0.04472	Production	1940884	1940888	QTL_ID=52257	trait=Length_of_productive_life	Abbrev=PL	breed=charolais,gelbvieh,hereford,limousin,pinzgauer,red_angus,red_poll,simmental,Angus	rs41584106
24	block_6_chr_24	rs41668379	rs42570102	1921310	1940886	19576	0.04472	Reproduction	1940884	1940888	QTL_ID=52254	trait=Daughter_pregnancy_rate	Abbrev=DPR	breed=holstein	rs136788107
24	block_6_chr_24	rs41668379	rs42570102	1921310	1940886	19576	0.04472	Reproduction	1940884	1940888	QTL_ID=52260	trait=Calving_ease	Abbrev=CALEASE	breed=holstein	rs133899835
24	block_6_chr_24	rs41668379	rs42570102	1921310	1940886	19576	0.04472	Reproduction	1940884	1940888	QTL_ID=52261	trait=Stillbirth	Abbrev=SB	breed=holstein	rs41584106
26	block_105_chr_26	rs109450346	rs42101711	46765748	46787804	22056	0.05346	Milk	46765746	46765750	QTL_ID=113783	trait=Milk_kappa-casein_percentage	Abbrev=MKCASP	breed=piedmontese
26	block_105_chr_26	rs109450346	rs42101711	46765748	46787804	22056	0.05346	Milk	46765746	46765750	QTL_ID=116938	trait=Milk_glycosylated_kappa-casein_percentage	Abbrev=MGKCASP	breed=charolais,hereford,limousin,simmental,Angus
27	block_50_chr_27	rs41646744	rs42118731	24839161	24870986	31825	0.07934	Reproduction	24839159	24839163	QTL_ID=62078	trait=Sperm_motility	Abbrev=SPMOT	breed=jersey
27	block_75_chr_27	rs109746481	rs109807388	38303470	38327324	23854	0.04816	Milk	38313415	38313419	QTL_ID=148239	trait=Milk_fat_percentage	Abbrev=FP
27	block_75_chr_27	rs109746481	rs109807388	38303470	38327324	23854	0.04816	Milk	38319664	38319668	QTL_ID=148375	trait=Milk_fat_percentage	Abbrev=FP
29	rs110643010	rs110643010	rs110643010	36519917	36519917	1	0.05115	Milk	36519915	36519919	QTL_ID=35479	trait=Milk_yield	Abbrev=MY
29	rs110643010	rs110643010	rs110643010	36519917	36519917	1	0.05115	Milk	36519915	36519919	QTL_ID=35948	trait=Milk_protein_percentage	Abbrev=PP
29	block_81_chr_29	rs42187697	rs42195887	41157401	41193917	36516	0.05807	Milk	41193915	41193919	QTL_ID=35698	trait=Milk_fat_percentage	Abbrev=FP
29	block_81_chr_29	rs42187697	rs42195887	41157401	41193917	36516	0.05807	Milk	41193915	41193919	QTL_ID=35967	trait=Milk_protein_percentage	Abbrev=PP
29	block_81_chr_29	rs42187697	rs42195887	41157401	41193917	36516	0.05807	Reproduction	41162573	41162577	QTL_ID=143428	trait=Interval_to_first_estrus_after_calving	Abbrev=CALEST
29	block_81_chr_29	rs42187697	rs42195887	41157401	41193917	36516	0.05807	Reproduction	41169152	41169156	QTL_ID=143467	trait=Interval_to_first_estrus_after_calving	Abbrev=CALEST
29	block_81_chr_29	rs42187697	rs42195887	41157401	41193917	36516	0.05807	Reproduction	41169963	41169967	QTL_ID=143466	trait=Interval_to_first_estrus_after_calving	Abbrev=CALEST
29	block_81_chr_29	rs42187697	rs42195887	41157401	41193917	36516	0.05807	Reproduction	41173038	41173042	QTL_ID=143487	trait=Interval_to_first_estrus_after_calving	Abbrev=CALEST
29	block_81_chr_29	rs42187697	rs42195887	41157401	41193917	36516	0.05807	Reproduction	41174273	41174277	QTL_ID=143497	trait=Interval_to_first_estrus_after_calving	Abbrev=CALEST
29	block_81_chr_29	rs42187697	rs42195887	41157401	41193917	36516	0.05807	Reproduction	41174372	41174376	QTL_ID=143499	trait=Interval_to_first_estrus_after_calving	Abbrev=CALEST
29	block_81_chr_29	rs42187697	rs42195887	41157401	41193917	36516	0.05807	Reproduction	41174923	41174927	QTL_ID=143522	trait=Interval_to_first_estrus_after_calving	Abbrev=CALEST
29	block_81_chr_29	rs42187697	rs42195887	41157401	41193917	36516	0.05807	Reproduction	41182134	41182138	QTL_ID=143525	trait=Interval_to_first_estrus_after_calving	Abbrev=CALEST
29	block_81_chr_29	rs42187697	rs42195887	41157401	41193917	36516	0.05807	Reproduction	41183133	41183137	QTL_ID=143526	trait=Interval_to_first_estrus_after_calving	Abbrev=CALEST
29	block_81_chr_29	rs42187697	rs42195887	41157401	41193917	36516	0.05807	Reproduction	41193304	41193308	QTL_ID=143528	trait=Interval_to_first_estrus_after_calving	Abbrev=CALEST
29	block_81_chr_29	rs42187697	rs42195887	41157401	41193917	36516	0.05807	Reproduction	41193540	41193544	QTL_ID=126011	trait=Fertility_index	Abbrev=FERIND

## Sheet: SNP_Haplotypes_LD0.80_top_0.001
Genes overlapped with the top 0.001% markers in percentage of variance explained
Chromosome	Marker	Start_SNP (marker)	END_SNP (marker)	Start_Position (marker)	End_Position (marker)	Size_in_kb(marker)	%Variance_explained	Ensembl_gene_ID	Start_Position (gene)	End_Position (gene)	Gene_name	Gene_type
1	block_182_chr_1	rs17871566	rs109858124	156749195	156778383	29188	0.04292	ENSBTAG00000012798	156340497	156841779	KCNH8	protein_coding
1	block_67_chr_1	rs43238752	rs41575644	64893868	64920298	26430	0.07571
1	rs41630032_1_chr_	rs41630032	rs41630032	126231619	126231619	1	0.04653	ENSBTAG00000016026	126132067	126231903	PCOLCE2	protein_coding
2	block_12_chr_2	rs43128174	rs43287402	9417024	9443359	26335	0.05882
2	block_37_chr_2	rs43303189	rs43302650	33265910	33302435	36525	0.07077	ENSBTAG00000045366	33277179	33277375	7SK	misc_RNA
3	block_135_chr_3	rs110656886	rs42460993	113880893	113901073	20180	0.05546	ENSBTAG00000054838	113885085	113894870	lncRNA
3	block_62_chr_3	rs42750404	rs42750367	68294393	68316834	22441	0.06238
4	block_40_chr_4	rs43389354	rs42765191	44268015	44304396	36381	0.04418	ENSBTAG00000016324	44146960	44363428	FBXL13	protein_coding
4	block_40_chr_4	rs43389354	rs42765191	44268015	44304396	36381	0.04418	ENSBTAG00000024379	44155991	44279731	LRRC17	protein_coding
4	block_7_chr_4	rs41659143	rs41659140	15935175	15961687	26512	0.05415	ENSBTAG00000043805	15943455	15943556	5S_rRNA	rRNA
4	block_7_chr_4	rs41659143	rs41659140	15935175	15961687	26512	0.05415	ENSBTAG00000047004	15734909	15991563	UMAD1	protein_coding
4	block_80_chr_4	rs41652995	rs109799835	70581054	70638508	57454	0.04162
5	block_102_chr_5	rs29018295	rs110389557	116055346	116078264	22918	0.08255	ENSBTAG00000009351	116028707	116169393	ATXN10	protein_coding
5	block_12_chr_5	rs109443432	rs41576637	13197225	13236807	39582	0.04272
5	rs110194000_5_chr_	rs110194000	rs110194000	118257944	118257944	1	0.04147
5	rs41577209_5_chr_	rs41577209	rs41577209	86641999	86641999	1	0.04201
6	block_102_chr_6	rs109165576	rs110841030	71206985	71230710	23725	0.0635	ENSBTAG00000044850	71213166	71213267	U6	snRNA
6	block_1_chr_6	rs110710192	rs41663389	641260	670124	28864	0.05323
6	block_58_chr_6	rs41595981	rs43465493	42305546	42344085	38539	0.04778	ENSBTAG00000020363	42263476	42395393	GBA3	protein_coding
7	block_113_chr_7	rs41605716	rs41580804	89523902	89546406	22504	0.06873
7	block_98_chr_7	rs43524272	rs43524294	73507133	73574389	67256	0.04035
8	block_15_chr_8	rs41620480	rs42866310	21108458	21145798	37340	0.05461
8	block_42_chr_8	rs43553193	rs41654687	43970992	43998136	27144	0.04097	ENSBTAG00000010976	43770176	43988755	KANK1	protein_coding
8	block_5_chr_8	rs42819192	rs42819198	6859755	6884117	24362	0.04972
8	rs29012723_8_chr_	rs29012723	rs29012723	108000794	108000794	1	0.05033
9	block_19_chr_9	rs41612816	rs109965999	15975938	15989506	13568	0.04816
9	rs29012613_9_chr_	rs29012613	rs29012613	19914423	19914423	1	0.04889	ENSBTAG00000012096	19804029	20074759	BCKDHB	protein_coding
10	block_17_chr_10	rs109984433	rs109504145	21334443	21363314	28871	0.05278
11	block_28_chr_11	rs43662934	rs43667475	13174635	13246972	72337	0.05038	ENSBTAG00000009242	13156084	13246782	ZNF638	protein_coding
11	block_52_chr_11	rs43669894	rs41591463	25557367	25580727	23360	0.05341	ENSBTAG00000003555	25515109	25845945	THADA	protein_coding
11	block_61_chr_11	rs43673968	rs43673200	28934504	28964630	30126	0.05576
11	block_90_chr_11	rs41588041	rs110397745	50166309	50202868	36559	0.04391	ENSBTAG00000052823	50126392	50191346	lncRNA
12	rs110539543_12_chr_	rs110539543	rs110539543	82719169	82719169	1	0.04595
13	block_95_chr_13	rs42799141	rs110815518	76117977	76142546	24569	0.04671	ENSBTAG00000007489	76036719	76152407	NCOA3	protein_coding
13	rs111003257_13_chr_	rs111003257	rs111003257	14736984	14736984	1	0.04506
14	block_113_chr_14	rs41648943	rs109873878	78612357	78632183	19826	0.04265
14	block_57_chr_14	rs41737077	rs41737059	30803553	30837616	34063	0.04205	ENSBTAG00000011981	30827578	30862362	MYBL1	protein_coding
14	block_57_chr_14	rs41737077	rs41737059	30803553	30837616	34063	0.04205	ENSBTAG00000053995	30822296	30822402	U6	snRNA
14	block_62_chr_14	rs42382244	rs43089152	38274985	38304478	29493	0.04815	ENSBTAG00000004411	38295064	38345541	CRISPLD1	protein_coding
14	block_70_chr_14	rs43576496	rs41661153	41944778	41965713	20935	0.04903	ENSBTAG00000016284	41937221	41996546	IL7	protein_coding
16	block_78_chr_16	rs41664179	rs41664177	77631297	77660465	29168	0.05758	ENSBTAG00000023144	77600496	77669271	PTPRC	protein_coding
16	block_78_chr_16	rs41664179	rs41664177	77631297	77660465	29168	0.05758	ENSBTAG00000046345	77633793	77634326	protein_coding
16	rs109346658_16_chr_	rs109346658	rs109346658	15634358	15634358	1	0.04663
16	rs41818125_16_chr_	rs41818125	rs41818125	80631818	80631818	1	0.04657
17	block_55_chr_17	rs42948217	rs41843533	57652704	57676485	23781	0.052	ENSBTAG00000044119	57231745	57664911	KSR2	protein_coding
19	rs109796698_19_chr_	rs109796698	rs109796698	31862344	31862344	1	0.04911
19	rs110466604_19_chr_	rs110466604	rs110466604	59835330	59835330	1	0.05292
19	rs41620696_19_chr_	rs41620696	rs41620696	32004132	32004132	1	0.05106
20	block_35_chr_20	rs42543872	rs42543895	38543545	38571692	28147	0.07875	ENSBTAG00000023529	38369475	38572090	SPEF2	protein_coding
20	block_46_chr_20	rs41948025	rs41601603	44442095	44480511	38416	0.04095
20	rs43350564_20_chr_	rs43350564	rs43350564	4709731	4709731	1	0.06189
21	rs29011028_21_chr_	rs29011028	rs29011028	66700229	66700229	1	0.05052	ENSBTAG00000020192	66678556	66817662	PPP2R5C	protein_coding
22	block_58_chr_22	rs41644452	rs42013343	46740639	46762508	21869	0.07479	ENSBTAG00000013117	45924535	46818511	CACNA2D3	protein_coding
23	block_41_chr_23	rs42037449	rs42037482	48067389	48104671	37282	0.04383	ENSBTAG00000005980	48048576	48110128	RREB1	protein_coding
23	block_7_chr_23	rs110708312	rs109793138	4861885	4892090	30205	0.04062	ENSBTAG00000025718	4789382	4986934	HMGCLL1	protein_coding
24	block_57_chr_24	rs110625017	rs109463210	45277744	45316923	39179	0.04081
26	block_47_chr_26	rs110105463	rs111008529	48859017	48880894	21877	0.07133	ENSBTAG00000050386	48818674	49095122	MGMT	protein_coding
26	block_4_chr_26	rs42082618	rs41568479	7546365	7567042	20677	0.04679	ENSBTAG00000018404	6899619	8313722	PRKG1	protein_coding
26	rs110109654_26_chr_	rs110109654	rs110109654	42758611	42758611	1	0.04838
27	block_29_chr_27	rs43331419	rs43331380	23526240	23560002	33762	0.04345	ENSBTAG00000015541	23395827	23916949	DLC1	protein_coding
27	block_32_chr_27	rs41584803	rs29023022	24976943	25015613	38670	0.04874
29	block_22_chr_29	rs109976529	rs42165802	34105016	34208123	103107	0.04376	ENSBTAG00000020769	33982760	34507701	OPCML	protein_coding
29	rs110643010_29_chr_	rs110643010	rs110643010	36519917	36519917	1	0.05263	ENSBTAG00000010411	36515554	36534251	ADAMTS8	protein_coding
30	block_1_chr_30	rs110586411	rs110094257	134519840	134545698	25858	0.07845
30	block_3_chr_30	rs109460397	rs29016272	138539853	138566171	26318	0.08546	ENSBTAG00000022150	138519497	138540790	MXRA5	protein_coding
QTL overlapped with the top 0.001% markers in percentage of variance explained
Chromosome	Marker	Start_SNP (marker)	END_SNP (marker)	Start_Position (marker)	End_Position (marker)	Size_in_kb(marker)	%Variance_explained	QTL_Type	Start_Position (QTL)	End_Position (QTL)	QTL_ID	Trait_associated	Trait_Abreviation	Breeds_found	Tag_SNP
1	block_67_chr_1	rs43238752	rs41575644	64893868	64920298	26430	0.07571	Reproduction	64893866	64893870	QTL_ID=21147	trait=Age_at_puberty	Abbrev=PUBAGE	breed=holstein	rs42462826
1	block_67_chr_1	rs43238752	rs41575644	64893868	64920298	26430	0.07571	Reproduction	64893866	64893870	QTL_ID=29831	trait=Age_at_puberty	Abbrev=PUBAGE	breed=holstein	rs41633081
1	block_67_chr_1	rs43238752	rs41575644	64893868	64920298	26430	0.07571	Reproduction	64920296	64920300	QTL_ID=29833	trait=Age_at_puberty	Abbrev=PUBAGE	breed=holstein	rs29019349
2	block_37_chr_2	rs43303189	rs43302650	33265910	33302435	36525	0.07077	Milk	33302433	33302437	QTL_ID=32557	trait=Milk_myristoleic_acid_content	Abbrev=MFA-C14:1	breed=holstein	rs41582008
3	block_135_chr_3	rs110656886	rs42460993	113880893	113901073	20180	0.05546	Milk	113884234	113884238	QTL_ID=64006	trait=Milk_riboflavin_content	Abbrev=RIBO	breed=holstein	rs41649818,rs29011657
3	block_135_chr_3	rs110656886	rs42460993	113880893	113901073	20180	0.05546	Milk	113889410	113889414	QTL_ID=64007	trait=Milk_riboflavin_content	Abbrev=RIBO	breed=holstein	rs134458891,rs136801407
5	block_12_chr_5	rs109443432	rs41576637	13197225	13236807	39582	0.04272	Milk	13236805	13236809	QTL_ID=125442	trait=Lactation_persistency	Abbrev=LACTPER	breed=gelbvieh	rs384679906
6	block_1_chr_6	rs110710192	rs41663389	641260	670124	28864	0.05323	Exterior	641258	641262	QTL_ID=41728	trait=Feet_and_leg_conformation	Abbrev=FTLEG	breed=Angus	rs135314769
6	block_1_chr_6	rs110710192	rs41663389	641260	670124	28864	0.05323	Exterior	641258	641262	QTL_ID=41731	trait=Teat_placement_-_front	Abbrev=FTPL	breed=gelbvieh	rs135411900
6	block_1_chr_6	rs110710192	rs41663389	641260	670124	28864	0.05323	Exterior	641258	641262	QTL_ID=41732	trait=Udder_attachment	Abbrev=UA	breed=gelbvieh	rs135640023
6	block_1_chr_6	rs110710192	rs41663389	641260	670124	28864	0.05323	Exterior	641258	641262	QTL_ID=41737	trait=Rear_leg_placement_-_rear_view	Abbrev=RLEGR	breed=gelbvieh	rs136137849
6	block_1_chr_6	rs110710192	rs41663389	641260	670124	28864	0.05323	Exterior	641258	641262	QTL_ID=41738	trait=Teat_placement_-_rear	Abbrev=RTPL	breed=charolais,gelbvieh,hereford,limousin,pinzgauer,red_angus,red_poll,simmental,Angus	rs136190942
6	block_1_chr_6	rs110710192	rs41663389	641260	670124	28864	0.05323	Exterior	641258	641262	QTL_ID=41739	trait=Udder_height	Abbrev=UHT	breed=charolais,gelbvieh,hereford,limousin,pinzgauer,red_angus,red_poll,simmental,Angus	rs136257809
6	block_1_chr_6	rs110710192	rs41663389	641260	670124	28864	0.05323	Exterior	641258	641262	QTL_ID=41741	trait=Stature	Abbrev=STA	breed=charolais,gelbvieh,hereford,limousin,pinzgauer,red_angus,red_poll,simmental,Angus	rs136413048
6	block_1_chr_6	rs110710192	rs41663389	641260	670124	28864	0.05323	Exterior	641258	641262	QTL_ID=41742	trait=Strength	Abbrev=STR	breed=charolais,gelbvieh,hereford,limousin,pinzgauer,red_angus,red_poll,simmental,Angus	rs136416413
6	block_1_chr_6	rs110710192	rs41663389	641260	670124	28864	0.05323	Exterior	641258	641262	QTL_ID=41743	trait=Udder_depth	Abbrev=UDPTH	breed=Girolando	rs136523990
6	block_1_chr_6	rs110710192	rs41663389	641260	670124	28864	0.05323	Milk	641258	641262	QTL_ID=41729	trait=Milk_fat_percentage	Abbrev=FP	breed=holstein	rs135384060
6	block_1_chr_6	rs110710192	rs41663389	641260	670124	28864	0.05323	Milk	641258	641262	QTL_ID=41733	trait=Milk_fat_yield	Abbrev=FY	breed=charolais,gelbvieh,hereford,limousin,pinzgauer,red_angus,red_poll,simmental,Angus	rs135680544
6	block_1_chr_6	rs110710192	rs41663389	641260	670124	28864	0.05323	Milk	641258	641262	QTL_ID=41735	trait=Milk_protein_percentage	Abbrev=PP	breed=holstein	rs135922395
6	block_1_chr_6	rs110710192	rs41663389	641260	670124	28864	0.05323	Milk	641258	641262	QTL_ID=41736	trait=Milk_protein_yield	Abbrev=PY	breed=gelbvieh	rs135937048
6	block_1_chr_6	rs110710192	rs41663389	641260	670124	28864	0.05323	Production	641258	641262	QTL_ID=41726	trait=Body_depth	Abbrev=BD	breed=Hanwoo	rs135125616
6	block_1_chr_6	rs110710192	rs41663389	641260	670124	28864	0.05323	Production	641258	641262	QTL_ID=41730	trait=PTA_type	Abbrev=PTAT	breed=Angus	rs135400595
6	block_1_chr_6	rs110710192	rs41663389	641260	670124	28864	0.05323	Production	641258	641262	QTL_ID=41734	trait=Net_merit	Abbrev=NM	breed=charolais,gelbvieh,hereford,limousin,pinzgauer,red_angus,red_poll,simmental,Angus	rs135688682
6	block_1_chr_6	rs110710192	rs41663389	641260	670124	28864	0.05323	Production	641258	641262	QTL_ID=41740	trait=Rump_width	Abbrev=RUMWD	breed=charolais,gelbvieh,hereford,limousin,pinzgauer,red_angus,red_poll,simmental,Angus	rs136283820
6	block_1_chr_6	rs110710192	rs41663389	641260	670124	28864	0.05323	Reproduction	641258	641262	QTL_ID=41727	trait=Calving_ease_(maternal)	Abbrev=CALEASE	breed=brangus	rs135147861
6	block_58_chr_6	rs41595981	rs43465493	42305546	42344085	38539	0.04778	Reproduction	42325282	42325286	QTL_ID=177018	trait=Conception_rate	Abbrev=CONCRATE	breed=jersey	rs29026112
6	block_102_chr_6	rs109165576	rs110841030	71206985	71230710	23725	0.0635	Exterior	71206983	71206987	QTL_ID=42094	trait=Foot_angle	Abbrev=FANG	breed=holstein	rs134909294
6	block_102_chr_6	rs109165576	rs110841030	71206985	71230710	23725	0.0635	Exterior	71206983	71206987	QTL_ID=42095	trait=Feet_and_leg_conformation	Abbrev=FTLEG	breed=holstein	rs135618950
6	block_102_chr_6	rs109165576	rs110841030	71206985	71230710	23725	0.0635	Exterior	71206983	71206987	QTL_ID=42098	trait=Teat_placement_-_front	Abbrev=FTPL	breed=holstein	rs135268913
6	block_102_chr_6	rs109165576	rs110841030	71206985	71230710	23725	0.0635	Exterior	71206983	71206987	QTL_ID=42099	trait=Udder_attachment	Abbrev=UA	breed=holstein	rs135476693
6	block_102_chr_6	rs109165576	rs110841030	71206985	71230710	23725	0.0635	Exterior	71206983	71206987	QTL_ID=42105	trait=Rear_leg_placement_-_rear_view	Abbrev=RLEGR	breed=holstein	rs43472177
6	block_102_chr_6	rs109165576	rs110841030	71206985	71230710	23725	0.0635	Exterior	71206983	71206987	QTL_ID=42106	trait=Udder_height	Abbrev=UHT	breed=holstein	rs43472180
6	block_102_chr_6	rs109165576	rs110841030	71206985	71230710	23725	0.0635	Exterior	71206983	71206987	QTL_ID=42110	trait=Stature	Abbrev=STA	breed=holstein	rs134319416
6	block_102_chr_6	rs109165576	rs110841030	71206985	71230710	23725	0.0635	Exterior	71206983	71206987	QTL_ID=42111	trait=Strength	Abbrev=STR	breed=holstein	rs110707460
6	block_102_chr_6	rs109165576	rs110841030	71206985	71230710	23725	0.0635	Exterior	71206983	71206987	QTL_ID=42112	trait=Udder_depth	Abbrev=UDPTH	breed=holstein	rs134319416
6	block_102_chr_6	rs109165576	rs110841030	71206985	71230710	23725	0.0635	Exterior	71230708	71230712	QTL_ID=42115	trait=Foot_angle	Abbrev=FANG	breed=holstein	rs110707460
6	block_102_chr_6	rs109165576	rs110841030	71206985	71230710	23725	0.0635	Exterior	71230708	71230712	QTL_ID=42116	trait=Feet_and_leg_conformation	Abbrev=FTLEG	breed=holstein	rs134319416
6	block_102_chr_6	rs109165576	rs110841030	71206985	71230710	23725	0.0635	Exterior	71230708	71230712	QTL_ID=42119	trait=Teat_placement_-_front	Abbrev=FTPL	breed=holstein	rs137439073
6	block_102_chr_6	rs109165576	rs110841030	71206985	71230710	23725	0.0635	Exterior	71230708	71230712	QTL_ID=42120	trait=Udder_attachment	Abbrev=UA	breed=holstein	rs137439073
6	block_102_chr_6	rs109165576	rs110841030	71206985	71230710	23725	0.0635	Exterior	71230708	71230712	QTL_ID=42126	trait=Rear_leg_placement_-_rear_view	Abbrev=RLEGR	breed=holstein	rs110354582
6	block_102_chr_6	rs109165576	rs110841030	71206985	71230710	23725	0.0635	Exterior	71230708	71230712	QTL_ID=42127	trait=Udder_height	Abbrev=UHT	breed=holstein	rs110354582
6	block_102_chr_6	rs109165576	rs110841030	71206985	71230710	23725	0.0635	Exterior	71230708	71230712	QTL_ID=42131	trait=Stature	Abbrev=STA	breed=holstein	rs43472217
6	block_102_chr_6	rs109165576	rs110841030	71206985	71230710	23725	0.0635	Exterior	71230708	71230712	QTL_ID=42132	trait=Strength	Abbrev=STR	breed=holstein	rs43472218
6	block_102_chr_6	rs109165576	rs110841030	71206985	71230710	23725	0.0635	Exterior	71230708	71230712	QTL_ID=42133	trait=Udder_depth	Abbrev=UDPTH	breed=holstein	rs43472218
6	block_102_chr_6	rs109165576	rs110841030	71206985	71230710	23725	0.0635	Milk	71206983	71206987	QTL_ID=42096	trait=Milk_fat_percentage	Abbrev=FP	breed=holstein	rs133878827
6	block_102_chr_6	rs109165576	rs110841030	71206985	71230710	23725	0.0635	Milk	71206983	71206987	QTL_ID=42100	trait=Milk_fat_yield	Abbrev=FY	breed=holstein	rs43472157
6	block_102_chr_6	rs109165576	rs110841030	71206985	71230710	23725	0.0635	Milk	71206983	71206987	QTL_ID=42103	trait=Milk_protein_percentage	Abbrev=PP	breed=holstein	rs137327740
6	block_102_chr_6	rs109165576	rs110841030	71206985	71230710	23725	0.0635	Milk	71206983	71206987	QTL_ID=42104	trait=Milk_protein_yield	Abbrev=PY	breed=holstein	rs43472176
6	block_102_chr_6	rs109165576	rs110841030	71206985	71230710	23725	0.0635	Milk	71230708	71230712	QTL_ID=42117	trait=Milk_fat_percentage	Abbrev=FP	breed=holstein	rs110707460
6	block_102_chr_6	rs109165576	rs110841030	71206985	71230710	23725	0.0635	Milk	71230708	71230712	QTL_ID=42121	trait=Milk_fat_yield	Abbrev=FY	breed=holstein	rs137439073
6	block_102_chr_6	rs109165576	rs110841030	71206985	71230710	23725	0.0635	Milk	71230708	71230712	QTL_ID=42124	trait=Milk_protein_percentage	Abbrev=PP	breed=holstein	rs110091883
6	block_102_chr_6	rs109165576	rs110841030	71206985	71230710	23725	0.0635	Milk	71230708	71230712	QTL_ID=42125	trait=Milk_protein_yield	Abbrev=PY	breed=holstein	rs110091883
6	block_102_chr_6	rs109165576	rs110841030	71206985	71230710	23725	0.0635	Production	71206983	71206987	QTL_ID=42092	trait=Body_depth	Abbrev=BD	breed=holstein	rs29001782
6	block_102_chr_6	rs109165576	rs110841030	71206985	71230710	23725	0.0635	Production	71206983	71206987	QTL_ID=42097	trait=PTA_type	Abbrev=PTAT	breed=holstein	rs134397439
6	block_102_chr_6	rs109165576	rs110841030	71206985	71230710	23725	0.0635	Production	71206983	71206987	QTL_ID=42101	trait=Net_merit	Abbrev=NM	breed=holstein	rs137625453
6	block_102_chr_6	rs109165576	rs110841030	71206985	71230710	23725	0.0635	Production	71206983	71206987	QTL_ID=42102	trait=Length_of_productive_life	Abbrev=PL	breed=holstein	rs135966324
6	block_102_chr_6	rs109165576	rs110841030	71206985	71230710	23725	0.0635	Production	71206983	71206987	QTL_ID=42107	trait=Rump_width	Abbrev=RUMWD	breed=holstein	rs379452380
6	block_102_chr_6	rs109165576	rs110841030	71206985	71230710	23725	0.0635	Production	71230708	71230712	QTL_ID=42113	trait=Body_depth	Abbrev=BD	breed=holstein	rs110707460
6	block_102_chr_6	rs109165576	rs110841030	71206985	71230710	23725	0.0635	Production	71230708	71230712	QTL_ID=42118	trait=PTA_type	Abbrev=PTAT	breed=holstein	rs110707460
6	block_102_chr_6	rs109165576	rs110841030	71206985	71230710	23725	0.0635	Production	71230708	71230712	QTL_ID=42122	trait=Net_merit	Abbrev=NM	breed=holstein	rs137439073
6	block_102_chr_6	rs109165576	rs110841030	71206985	71230710	23725	0.0635	Production	71230708	71230712	QTL_ID=42123	trait=Length_of_productive_life	Abbrev=PL	breed=holstein	rs110091883
6	block_102_chr_6	rs109165576	rs110841030	71206985	71230710	23725	0.0635	Production	71230708	71230712	QTL_ID=42128	trait=Rump_width	Abbrev=RUMWD	breed=holstein	rs110354582
6	block_102_chr_6	rs109165576	rs110841030	71206985	71230710	23725	0.0635	Production	.	.	QTL_ID=181936	trait=Dry_matter_intake	Abbrev=DMI	breed=charolais,gelbvieh,hereford,limousin,pinzgauer,red_angus,red_poll,simmental,Angus	rs109165576
6	block_102_chr_6	rs109165576	rs110841030	71206985	71230710	23725	0.0635	Production	.	.	QTL_ID=182379	trait=Dry_matter_intake	Abbrev=DMI	breed=Angus	rs110841030
6	block_102_chr_6	rs109165576	rs110841030	71206985	71230710	23725	0.0635	Production	.	.	QTL_ID=184562	trait=Average_daily_gain	Abbrev=ADG	breed=charolais,gelbvieh,hereford,limousin,pinzgauer,red_angus,red_poll,simmental,Angus	rs110841030
6	block_102_chr_6	rs109165576	rs110841030	71206985	71230710	23725	0.0635	Production	.	.	QTL_ID=185307	trait=Average_daily_gain	Abbrev=ADG	breed=Maine-Anjou	rs110841030
6	block_102_chr_6	rs109165576	rs110841030	71206985	71230710	23725	0.0635	Production	.	.	QTL_ID=185502	trait=Average_daily_gain	Abbrev=ADG	breed=norwegian_red	rs109165576
6	block_102_chr_6	rs109165576	rs110841030	71206985	71230710	23725	0.0635	Production	.	.	QTL_ID=185746	trait=Average_daily_gain	Abbrev=ADG	breed=norwegian_red	rs109165576
6	block_102_chr_6	rs109165576	rs110841030	71206985	71230710	23725	0.0635	Production	.	.	QTL_ID=185966	trait=Average_daily_gain	Abbrev=ADG	breed=Wagyu	rs109165576
6	block_102_chr_6	rs109165576	rs110841030	71206985	71230710	23725	0.0635	Production	.	.	QTL_ID=187366	trait=Metabolic_body_weight	Abbrev=MBW	breed=charolais,gelbvieh,hereford,limousin,pinzgauer,red_angus,red_poll,simmental,Angus	rs110841030
6	block_102_chr_6	rs109165576	rs110841030	71206985	71230710	23725	0.0635	Production	.	.	QTL_ID=187474	trait=Metabolic_body_weight	Abbrev=MBW	breed=charolais,gelbvieh,hereford,limousin,simmental,Angus	rs110841030
6	block_102_chr_6	rs109165576	rs110841030	71206985	71230710	23725	0.0635	Production	.	.	QTL_ID=188492	trait=Metabolic_body_weight	Abbrev=MBW	breed=norwegian_red	rs110841030
6	block_102_chr_6	rs109165576	rs110841030	71206985	71230710	23725	0.0635	Production	.	.	QTL_ID=188805	trait=Metabolic_body_weight	Abbrev=MBW	breed=charolais,gelbvieh,hereford,limousin,simmental,Angus	rs109165576
6	block_102_chr_6	rs109165576	rs110841030	71206985	71230710	23725	0.0635	Production	.	.	QTL_ID=189289	trait=Metabolic_body_weight	Abbrev=MBW	breed=norwegian_red	rs109165576
6	block_102_chr_6	rs109165576	rs110841030	71206985	71230710	23725	0.0635	Production	.	.	QTL_ID=189510	trait=Metabolic_body_weight	Abbrev=MBW	breed=holstein	rs110841030
6	block_102_chr_6	rs109165576	rs110841030	71206985	71230710	23725	0.0635	Production	.	.	QTL_ID=189637	trait=Metabolic_body_weight	Abbrev=MBW	breed=norwegian_red	rs109165576
6	block_102_chr_6	rs109165576	rs110841030	71206985	71230710	23725	0.0635	Reproduction	71206983	71206987	QTL_ID=42093	trait=Calving_ease_(maternal)	Abbrev=CALEASE	breed=holstein	rs134909294
6	block_102_chr_6	rs109165576	rs110841030	71206985	71230710	23725	0.0635	Reproduction	71206983	71206987	QTL_ID=42108	trait=Calving_ease	Abbrev=CALEASE	breed=holstein	rs452449360
6	block_102_chr_6	rs109165576	rs110841030	71206985	71230710	23725	0.0635	Reproduction	71206983	71206987	QTL_ID=42109	trait=Stillbirth	Abbrev=SB	breed=holstein	rs110707460
6	block_102_chr_6	rs109165576	rs110841030	71206985	71230710	23725	0.0635	Reproduction	71230708	71230712	QTL_ID=42114	trait=Calving_ease_(maternal)	Abbrev=CALEASE	breed=holstein	rs134319416
6	block_102_chr_6	rs109165576	rs110841030	71206985	71230710	23725	0.0635	Reproduction	71230708	71230712	QTL_ID=42129	trait=Calving_ease	Abbrev=CALEASE	breed=holstein	rs110354582
6	block_102_chr_6	rs109165576	rs110841030	71206985	71230710	23725	0.0635	Reproduction	71230708	71230712	QTL_ID=42130	trait=Stillbirth	Abbrev=SB	breed=holstein	rs43472218
7	block_98_chr_7	rs43524272	rs43524294	73507133	73574389	67256	0.04035	Reproduction	73514355	73514359	QTL_ID=212624	trait=Inseminations_per_conception	Abbrev=CONCEPT	breed=charolais,gelbvieh,hereford,limousin,pinzgauer,red_angus,red_poll,simmental,Angus	rs41571256
7	block_113_chr_7	rs41605716	rs41580804	89523902	89546406	22504	0.06873	Exterior	89523900	89523904	QTL_ID=43369	trait=Dairy_form	Abbrev=DYF	breed=brahman	rs29025644,rs110378393
7	block_113_chr_7	rs41605716	rs41580804	89523902	89546406	22504	0.06873	Exterior	89523900	89523904	QTL_ID=43370	trait=Feet_and_leg_conformation	Abbrev=FTLEG	breed=charolais,chianina,gelbvieh,hereford,holstein,limousin,piedmontese,red_angus,simmental,Angus,Maine-Anjou	rs43643999,rs109559045
7	block_113_chr_7	rs41605716	rs41580804	89523902	89546406	22504	0.06873	Exterior	89523900	89523904	QTL_ID=43372	trait=Teat_placement_-_front	Abbrev=FTPL	breed=holstein	rs41656867,rs109989268
7	block_113_chr_7	rs41605716	rs41580804	89523902	89546406	22504	0.06873	Exterior	89523900	89523904	QTL_ID=43373	trait=Udder_attachment	Abbrev=UA	breed=holstein	rs43642998,rs43650173
7	block_113_chr_7	rs41605716	rs41580804	89523902	89546406	22504	0.06873	Exterior	89523900	89523904	QTL_ID=43374	trait=Rear_leg_placement_-_rear_view	Abbrev=RLEGR	breed=holstein	rs109914287,rs43650187
7	block_113_chr_7	rs41605716	rs41580804	89523902	89546406	22504	0.06873	Exterior	89523900	89523904	QTL_ID=43375	trait=Teat_placement_-_rear	Abbrev=RTPL	breed=charolais,chianina,gelbvieh,hereford,holstein,limousin,piedmontese,red_angus,simmental,Angus,Maine-Anjou	rs110179938,rs110169119
7	block_113_chr_7	rs41605716	rs41580804	89523902	89546406	22504	0.06873	Exterior	89523900	89523904	QTL_ID=43376	trait=Udder_height	Abbrev=UHT	breed=charolais,gelbvieh,hereford,limousin,pinzgauer,red_angus,red_poll,simmental,Angus	rs110201865,rs110056495
7	block_113_chr_7	rs41605716	rs41580804	89523902	89546406	22504	0.06873	Exterior	89523900	89523904	QTL_ID=43378	trait=Stature	Abbrev=STA	breed=charolais,gelbvieh,hereford,limousin,pinzgauer,red_angus,red_poll,simmental,Angus	rs43642675,rs43643308
7	block_113_chr_7	rs41605716	rs41580804	89523902	89546406	22504	0.06873	Exterior	89523900	89523904	QTL_ID=43379	trait=Strength	Abbrev=STR	breed=charolais,gelbvieh,hereford,limousin,pinzgauer,red_angus,red_poll,simmental,Angus	rs41593885,rs110566925
7	block_113_chr_7	rs41605716	rs41580804	89523902	89546406	22504	0.06873	Exterior	89523900	89523904	QTL_ID=43380	trait=Udder_cleft	Abbrev=UC	breed=holstein	rs43647828,rs42868836
7	block_113_chr_7	rs41605716	rs41580804	89523902	89546406	22504	0.06873	Exterior	89523900	89523904	QTL_ID=43381	trait=Udder_depth	Abbrev=UDPTH	breed=holstein	rs110584450,rs109103352
7	block_113_chr_7	rs41605716	rs41580804	89523902	89546406	22504	0.06873	Exterior	89546404	89546408	QTL_ID=43383	trait=Dairy_form	Abbrev=DYF	breed=holstein	rs132960291,rs110702652,rs136362611
7	block_113_chr_7	rs41605716	rs41580804	89523902	89546406	22504	0.06873	Exterior	89546404	89546408	QTL_ID=43384	trait=Feet_and_leg_conformation	Abbrev=FTLEG	breed=charolais,gelbvieh,hereford,limousin,pinzgauer,red_angus,red_poll,simmental,Angus	rs132960291,rs110702652,rs136362611
7	block_113_chr_7	rs41605716	rs41580804	89523902	89546406	22504	0.06873	Exterior	89546404	89546408	QTL_ID=43386	trait=Teat_placement_-_front	Abbrev=FTPL	breed=ayrshire,danish_red,holstein,jersey,norwegian_red,Swedish_Red-and-White	rs43619255,rs41655411,rs43614585
7	block_113_chr_7	rs41605716	rs41580804	89523902	89546406	22504	0.06873	Exterior	89546404	89546408	QTL_ID=43387	trait=Udder_attachment	Abbrev=UA	breed=holstein	rs135198463,rs41597142,rs136081666
7	block_113_chr_7	rs41605716	rs41580804	89523902	89546406	22504	0.06873	Exterior	89546404	89546408	QTL_ID=43388	trait=Rear_leg_placement_-_rear_view	Abbrev=RLEGR	breed=holstein	rs109898540
7	block_113_chr_7	rs41605716	rs41580804	89523902	89546406	22504	0.06873	Exterior	89546404	89546408	QTL_ID=43389	trait=Teat_placement_-_rear	Abbrev=RTPL	breed=holstein	rs109755494
7	block_113_chr_7	rs41605716	rs41580804	89523902	89546406	22504	0.06873	Exterior	89546404	89546408	QTL_ID=43390	trait=Udder_height	Abbrev=UHT	breed=holstein	rs109220955
7	block_113_chr_7	rs41605716	rs41580804	89523902	89546406	22504	0.06873	Exterior	89546404	89546408	QTL_ID=43392	trait=Stature	Abbrev=STA	breed=holstein	rs29022040
7	block_113_chr_7	rs41605716	rs41580804	89523902	89546406	22504	0.06873	Exterior	89546404	89546408	QTL_ID=43393	trait=Strength	Abbrev=STR	breed=holstein	rs137826123
7	block_113_chr_7	rs41605716	rs41580804	89523902	89546406	22504	0.06873	Exterior	89546404	89546408	QTL_ID=43394	trait=Udder_cleft	Abbrev=UC	breed=brahman	rs133252628
7	block_113_chr_7	rs41605716	rs41580804	89523902	89546406	22504	0.06873	Exterior	89546404	89546408	QTL_ID=43395	trait=Udder_depth	Abbrev=UDPTH	breed=brahman	rs137713131
7	block_113_chr_7	rs41605716	rs41580804	89523902	89546406	22504	0.06873	Production	89523900	89523904	QTL_ID=43368	trait=Body_depth	Abbrev=BD	breed=blonde_d'aquitaine	rs42802606,rs41656325
7	block_113_chr_7	rs41605716	rs41580804	89523902	89546406	22504	0.06873	Production	89523900	89523904	QTL_ID=43371	trait=PTA_type	Abbrev=PTAT	breed=charolais,chianina,gelbvieh,hereford,holstein,limousin,piedmontese,red_angus,simmental,Angus,Maine-Anjou	rs43642952,rs43637279
7	block_113_chr_7	rs41605716	rs41580804	89523902	89546406	22504	0.06873	Production	89523900	89523904	QTL_ID=43377	trait=Rump_width	Abbrev=RUMWD	breed=Angus	rs110838923,rs41594273
7	block_113_chr_7	rs41605716	rs41580804	89523902	89546406	22504	0.06873	Production	89546404	89546408	QTL_ID=43382	trait=Body_depth	Abbrev=BD	breed=holstein	rs43643837,rs42868892
7	block_113_chr_7	rs41605716	rs41580804	89523902	89546406	22504	0.06873	Production	89546404	89546408	QTL_ID=43385	trait=PTA_type	Abbrev=PTAT	breed=holstein	rs43619255,rs41655411,rs43614585
7	block_113_chr_7	rs41605716	rs41580804	89523902	89546406	22504	0.06873	Production	89546404	89546408	QTL_ID=43391	trait=Rump_width	Abbrev=RUMWD	breed=holstein	rs137527434
8	block_42_chr_8	rs43553193	rs41654687	43970992	43998136	27144	0.04097	Health	43993393	43993397	QTL_ID=178966	trait=Bovine_tuberculosis_susceptibility	Abbrev=BTBS	breed=holstein	rs43630014
10	block_17_chr_10	rs109984433	rs109504145	21334443	21363314	28871	0.05278	Production	21363312	21363316	QTL_ID=68117	trait=Body_weight_(yearling)	Abbrev=W365	breed=holstein	rs109819913
10	block_17_chr_10	rs109984433	rs109504145	21334443	21363314	28871	0.05278	Production	21363312	21363316	QTL_ID=68118	trait=Body_weight_gain	Abbrev=BWG	breed=holstein	rs109313220
11	block_52_chr_11	rs43669894	rs41591463	25557367	25580727	23360	0.05341	Reproduction	25557365	25557369	QTL_ID=106980	trait=Daughter_pregnancy_rate	Abbrev=DPR	breed=holstein	rs110783012
11	block_52_chr_11	rs43669894	rs41591463	25557367	25580727	23360	0.05341	Reproduction	25557365	25557369	QTL_ID=107136	trait=Conception_rate	Abbrev=CONCRATE	breed=holstein	rs109747867
11	block_90_chr_11	rs41588041	rs110397745	50166309	50202868	36559	0.04391	Production	50202866	50202870	QTL_ID=68310	trait=Body_weight_gain	Abbrev=BWG	breed=simmental	rs41603335
13	rs111003257	rs111003257	rs111003257	14736984	14736984	1	0.04506	Health	14736982	14736986	QTL_ID=135799	trait=Tick_resistance	Abbrev=TICKR	breed=jersey	rs110444021
13	rs111003257	rs111003257	rs111003257	14736984	14736984	1	0.04506	Production	14736982	14736986	QTL_ID=68559	trait=Body_weight_gain	Abbrev=BWG	breed=norwegian_red	rs41579243
13	block_95_chr_13	rs42799141	rs110815518	76117977	76142546	24569	0.04671	Reproduction	76130448	76130452	QTL_ID=176799	trait=First_service_conception	Abbrev=FSC	breed=ayrshire,danish_red,Swedish_Red-and-White	rs109326954,rs109234250
13	block_95_chr_13	rs42799141	rs110815518	76117977	76142546	24569	0.04671	Reproduction	76130448	76130452	QTL_ID=177143	trait=Conception_rate	Abbrev=CONCRATE	breed=ayrshire,danish_red,Swedish_Red-and-White	rs109326954,rs109234250
14	block_57_chr_14	rs41737077	rs41737059	30803553	30837616	34063	0.04205	Milk	30837614	30837618	QTL_ID=158047	trait=Milking_speed	Abbrev=MSPD	breed=holstein	rs110571385
14	block_70_chr_14	rs43576496	rs41661153	41944778	41965713	20935	0.04903	Milk	41944776	41944780	QTL_ID=158090	trait=Milking_speed	Abbrev=MSPD	breed=holstein	rs109715014
14	block_70_chr_14	rs43576496	rs41661153	41944778	41965713	20935	0.04903	Milk	41944776	41944780	QTL_ID=175015	trait=Milk_protein_percentage	Abbrev=PP	breed=holstein	rs42311889
19	rs109796698	rs109796698	rs109796698	31862344	31862344	1	0.04911	Reproduction	31862342	31862346	QTL_ID=15493	trait=Gestation_length	Abbrev=GLENGTH	breed=holstein	rs110811379
19	rs109796698	rs109796698	rs109796698	31862344	31862344	1	0.04911	Reproduction	31862342	31862346	QTL_ID=15494	trait=Gestation_length	Abbrev=GLENGTH	breed=holstein	rs41948991
20	rs43350564	rs43350564	rs43350564	4709731	4709731	1	0.06189	Exterior	4709729	4709733	QTL_ID=50404	trait=Feet_and_leg_conformation	Abbrev=FTLEG	breed=holstein	rs136574946
20	rs43350564	rs43350564	rs43350564	4709731	4709731	1	0.06189	Exterior	4709729	4709733	QTL_ID=50406	trait=Teat_placement_-_front	Abbrev=FTPL	breed=holstein	rs132888075
20	rs43350564	rs43350564	rs43350564	4709731	4709731	1	0.06189	Exterior	4709729	4709733	QTL_ID=50407	trait=Udder_attachment	Abbrev=UA	breed=holstein	rs135995007
20	rs43350564	rs43350564	rs43350564	4709731	4709731	1	0.06189	Exterior	4709729	4709733	QTL_ID=50409	trait=Teat_placement_-_rear	Abbrev=RTPL	breed=holstein	rs134340615
20	rs43350564	rs43350564	rs43350564	4709731	4709731	1	0.06189	Exterior	4709729	4709733	QTL_ID=50413	trait=Stature	Abbrev=STA	breed=braunvieh,holstein,jersey,normande,norwegian_red,Fleckvieh,Montbéliarde,Australian_Red	rs135416871
20	rs43350564	rs43350564	rs43350564	4709731	4709731	1	0.06189	Exterior	4709729	4709733	QTL_ID=50414	trait=Strength	Abbrev=STR	breed=holstein	rs133457830
20	rs43350564	rs43350564	rs43350564	4709731	4709731	1	0.06189	Exterior	4709729	4709733	QTL_ID=50415	trait=Teat_length	Abbrev=TLGTH	breed=jersey	rs135208296
20	rs43350564	rs43350564	rs43350564	4709731	4709731	1	0.06189	Exterior	4709729	4709733	QTL_ID=50416	trait=Udder_cleft	Abbrev=UC	breed=holstein	rs132852832
20	rs43350564	rs43350564	rs43350564	4709731	4709731	1	0.06189	Exterior	4709729	4709733	QTL_ID=50417	trait=Udder_depth	Abbrev=UDPTH	breed=holstein	rs134471789
20	rs43350564	rs43350564	rs43350564	4709731	4709731	1	0.06189	Health	4709729	4709733	QTL_ID=50412	trait=Somatic_cell_score	Abbrev=SCS	breed=holstein	rs211333797
20	rs43350564	rs43350564	rs43350564	4709731	4709731	1	0.06189	Production	4709729	4709733	QTL_ID=164127	trait=Body_weight_(weaning)	Abbrev=WWT	breed=holstein	rs385551988
20	rs43350564	rs43350564	rs43350564	4709731	4709731	1	0.06189	Production	4709729	4709733	QTL_ID=164206	trait=Body_weight_(yearling)	Abbrev=W365	breed=jersey	rs136073509
20	rs43350564	rs43350564	rs43350564	4709731	4709731	1	0.06189	Production	4709729	4709733	QTL_ID=164416	trait=Body_weight_(birth)	Abbrev=BW	breed=jersey	rs209178266
20	rs43350564	rs43350564	rs43350564	4709731	4709731	1	0.06189	Production	4709729	4709733	QTL_ID=164436	trait=Body_weight_(weaning)	Abbrev=WWT	breed=Angus	rs136638907
20	rs43350564	rs43350564	rs43350564	4709731	4709731	1	0.06189	Production	4709729	4709733	QTL_ID=164476	trait=Average_daily_gain	Abbrev=ADG	breed=holstein	rs379843779
20	rs43350564	rs43350564	rs43350564	4709731	4709731	1	0.06189	Production	4709729	4709733	QTL_ID=164535	trait=Body_weight_(yearling)	Abbrev=W365	breed=jersey	rs379127502
20	rs43350564	rs43350564	rs43350564	4709731	4709731	1	0.06189	Production	4709729	4709733	QTL_ID=176528	trait=Body_weight_(birth)	Abbrev=BW	breed=holstein	rs110354299
20	rs43350564	rs43350564	rs43350564	4709731	4709731	1	0.06189	Production	4709729	4709733	QTL_ID=186241	trait=Average_daily_gain	Abbrev=ADG	breed=holstein	rs133774342
20	rs43350564	rs43350564	rs43350564	4709731	4709731	1	0.06189	Production	4709729	4709733	QTL_ID=190174	trait=Metabolic_body_weight	Abbrev=MBW	breed=holstein	rs133204718
20	rs43350564	rs43350564	rs43350564	4709731	4709731	1	0.06189	Production	4709729	4709733	QTL_ID=50405	trait=PTA_type	Abbrev=PTAT	breed=holstein	rs137420632
20	rs43350564	rs43350564	rs43350564	4709731	4709731	1	0.06189	Production	4709729	4709733	QTL_ID=50408	trait=Length_of_productive_life	Abbrev=PL	breed=holstein	rs209318724
20	rs43350564	rs43350564	rs43350564	4709731	4709731	1	0.06189	Production	4709729	4709733	QTL_ID=50410	trait=Rump_width	Abbrev=RUMWD	breed=holstein	rs137010570
20	rs43350564	rs43350564	rs43350564	4709731	4709731	1	0.06189	Production	4709729	4709733	QTL_ID=66693	trait=Body_weight_(birth)	Abbrev=BW	breed=holstein	rs135280215
20	rs43350564	rs43350564	rs43350564	4709731	4709731	1	0.06189	Reproduction	4709729	4709733	QTL_ID=50403	trait=Calving_ease_(maternal)	Abbrev=CALEASE	breed=nelore	rs134074459
20	rs43350564	rs43350564	rs43350564	4709731	4709731	1	0.06189	Reproduction	4709729	4709733	QTL_ID=50411	trait=Calving_ease	Abbrev=CALEASE	breed=holstein	rs384903793
21	rs29011028	rs29011028	rs29011028	66700229	66700229	1	0.05052	Health	66700227	66700231	QTL_ID=165364	trait=Immunoglobulin_G_level	Abbrev=SIGG	breed=charolais,gelbvieh,hereford,limousin,simmental,Angus	rs135130537
23	block_7_chr_23	rs110708312	rs109793138	4861885	4892090	30205	0.04062	Production	4861883	4861887	QTL_ID=157031	trait=Body_weight_(yearling)	Abbrev=W365	breed=brown_swiss	rs109199086
23	block_7_chr_23	rs110708312	rs109793138	4861885	4892090	30205	0.04062	Production	4892088	4892092	QTL_ID=157030	trait=Body_weight_(yearling)	Abbrev=W365	breed=brown_swiss	rs109176259
23	block_7_chr_23	rs110708312	rs109793138	4861885	4892090	30205	0.04062	Reproduction	4861883	4861887	QTL_ID=14785	trait=Fertility_treatments	Abbrev=FERTRT	breed=ayrshire,danish_red,Swedish_Red-and-White	rs42086574
23	block_41_chr_23	rs42037449	rs42037482	48067389	48104671	37282	0.04383	Exterior	48104669	48104673	QTL_ID=107642	trait=Temperament	Abbrev=TMP	breed=ayrshire,danish_red,Swedish_Red-and-White	rs110591920
29	rs110643010	rs110643010	rs110643010	36519917	36519917	1	0.05263	Milk	36519915	36519919	QTL_ID=35479	trait=Milk_yield	Abbrev=MY
29	rs110643010	rs110643010	rs110643010	36519917	36519917	1	0.05263	Milk	36519915	36519919	QTL_ID=35948	trait=Milk_protein_percentage	Abbrev=PP

## Sheet: SNP_Haplotypes_LD0.15_top_0.01%
Genes overlapped with the top 0.001% markers in percentage of variance explained
Chromosome	Marker	Start_SNP (marker)	END_SNP (marker)	Start_Position (marker)	End_Position (marker)	Size_in_kb(marker)	%Variance_explained	Ensembl_gene_ID	Start_Position (gene)	End_Position (gene)	Gene_name	Gene_type
1	block_14_chr_1	rs110593395	rs29024375	4250046	4309205	59159	0.03595	ENSBTAG00000017839	4192104	4358253	TIAM1	protein_coding
1	block_14_chr_1	rs110593395	rs29024375	4250046	4309205	59159	0.03595	ENSBTAG00000044299	4288068	4288144	bta-mir-2284i	miRNA
1	block_145_chr_1	rs42584386	rs41610345	45182041	45281490	99449	0.0359	ENSBTAG00000016363	45155599	45188354	TFG	protein_coding
1	block_145_chr_1	rs42584386	rs41610345	45182041	45281490	99449	0.0359	ENSBTAG00000026836	45273441	45477104	protein_coding
1	block_224_chr_1	rs41255415	rs108992751	66150690	66188904	38214	0.03087	ENSBTAG00000008862	66151427	66215030	GOLGB1	protein_coding
1	block_233_chr_1	rs109261088	rs41579089	67755460	67805608	50148	0.03015	ENSBTAG00000018777	67666437	67823745	ADCY5	protein_coding
1	block_311_chr_1	rs42455329	rs41613169	91673661	91758979	85318	0.03922	ENSBTAG00000048493	91436009	92436553	NAALADL2	protein_coding
1	block_408_chr_1	rs109483880	rs29019947	116654067	116725563	71496	0.05157	ENSBTAG00000015837	116694941	116747192	P2RY12	protein_coding
1	block_408_chr_1	rs109483880	rs29019947	116654067	116725563	71496	0.05157	ENSBTAG00000021703	116654940	117017533	MED12L	protein_coding
1	block_418_chr_1	rs43265648	rs41635984	118603687	118638525	34838	0.03265	ENSBTAG00000007814	118469263	118642804	WWTR1	protein_coding
1	block_577_chr_1	rs109668017	rs41617748	156644833	156682865	38032	0.04994	ENSBTAG00000012798	156340497	156841779	KCNH8	protein_coding
2	block_327_chr_2	rs110545131	rs110597851	86685861	86732417	46556	0.03358	ENSBTAG00000007635	86319697	86686609	PLCL1	protein_coding
2	block_451_chr_2	rs109309637	rs109780234	127218611	127238953	20342	0.0317	ENSBTAG00000021781	127238786	127253787	MTFR1L	protein_coding
2	block_451_chr_2	rs109309637	rs109780234	127218611	127238953	20342	0.0317	ENSBTAG00000021786	127225459	127237892	AUNIP	protein_coding
2	block_451_chr_2	rs109309637	rs109780234	127218611	127238953	20342	0.0317	ENSBTAG00000021787	127217390	127222938	PAQR7	protein_coding
2	block_456_chr_2	rs110916024	rs110295483	128428771	128458001	29230	0.04274	ENSBTAG00000013048	128445501	128496459	NIPAL3	protein_coding
3	block_136_chr_3	rs43117607	rs42586854	46613397	46680174	66777	0.03064	ENSBTAG00000008809	46655713	46739928	PTBP2	protein_coding
3	block_144_chr_3	rs43339412	rs110384429	48234094	48285929	51835	0.04588	ENSBTAG00000021537	48239823	48252404	RWDD3	protein_coding
3	block_320_chr_3	rs43350848	rs109726753	92054056	92123920	69864	0.04603	ENSBTAG00000020036	92081757	92090351	CDCP2	protein_coding
3	block_320_chr_3	rs43350848	rs109726753	92054056	92123920	69864	0.04603	ENSBTAG00000020037	92033900	92060024	CYB5RL	protein_coding
3	block_412_chr_3	rs110783401	rs109572605	112221070	112257692	36622	0.03689	ENSBTAG00000005784	111603940	112289188	CSMD2	protein_coding
3	block_420_chr_3	rs110656886	rs42460993	113880893	113901073	20180	0.05242	ENSBTAG00000054838	113885085	113894870	lncRNA
3	block_452_chr_3	rs109475915	rs43370810	120380233	120402371	22138	0.04411	ENSBTAG00000000789	120373077	120389112	PPP1R7	protein_coding
4	block_46_chr_4	rs41659143	rs41659140	15935175	15961687	26512	0.04969	ENSBTAG00000043805	15943455	15943556	5S_rRNA	rRNA
4	block_46_chr_4	rs41659143	rs41659140	15935175	15961687	26512	0.04969	ENSBTAG00000047004	15734909	15991563	UMAD1	protein_coding
4	block_122_chr_4	rs42169452	rs110203552	36966333	36990307	23974	0.02844	ENSBTAG00000014920	36966817	37237011	SEMA3E	protein_coding
4	block_183_chr_4	rs29019875	rs110304724	52488450	52510424	21974	0.0314	ENSBTAG00000014228	52282339	52499410	TFEC	protein_coding
4	block_219_chr_4	rs43402375	rs43400956	61247646	61322228	74582	0.04336	ENSBTAG00000001182	61204174	61302729	SEPTIN7	protein_coding
4	block_219_chr_4	rs43402375	rs43400956	61247646	61322228	74582	0.04336	ENSBTAG00000051302	61259466	61259572	U6	snRNA
4	block_291_chr_4	rs41599805	rs41654185	80520587	80544515	23928	0.04913	ENSBTAG00000032121	80159127	80928936	SUGCT	protein_coding
4	block_383_chr_4	rs109961694	rs108987844	104402564	104440941	38377	0.03511	ENSBTAG00000051724	104316587	104452633	protein_coding
5	block_92_chr_5	rs29002549	rs29003499	30184122	30204315	20193	0.03167	ENSBTAG00000016589	30202309	30240990	PRPF40B	protein_coding
5	block_92_chr_5	rs29002549	rs29003499	30184122	30204315	20193	0.03167	ENSBTAG00000016593	30151294	30202352	FMNL3	protein_coding
5	block_106_chr_5	rs42236367	rs109247645	36874841	36911894	37053	0.02817	ENSBTAG00000000395	36905169	37122215	ADAMTS20	protein_coding
5	block_180_chr_5	rs109739902	rs109980961	73581692	73619330	37638	0.028	ENSBTAG00000045785	73547847	73588700	TOM1	protein_coding
5	block_285_chr_5	rs109505514	rs29018725	112126293	112165809	39516	0.02939	ENSBTAG00000006204	112115956	112159105	XPNPEP3	protein_coding
5	block_285_chr_5	rs109505514	rs29018725	112126293	112165809	39516	0.02939	ENSBTAG00000053583	112162636	112176251	RBX1	protein_coding
5	block_302_chr_5	rs110844659	rs109886869	116015434	116134185	118751	0.03339	ENSBTAG00000009351	116028707	116169393	ATXN10	protein_coding
5	block_303_chr_5	rs109513912	rs110659119	116391317	116448403	57086	0.02876	ENSBTAG00000008063	116438987	116507065	PPARA	protein_coding
5	block_303_chr_5	rs109513912	rs110659119	116391317	116448403	57086	0.02876	ENSBTAG00000029772	116408410	116408483	bta-let-7a-3	miRNA
5	block_303_chr_5	rs109513912	rs110659119	116391317	116448403	57086	0.02876	ENSBTAG00000036417	116409213	116409295	bta-mir-3596	miRNA
5	block_303_chr_5	rs109513912	rs110659119	116391317	116448403	57086	0.02876	ENSBTAG00000045309	116408665	116408737	bta-mir-2443	miRNA
5	block_303_chr_5	rs109513912	rs110659119	116391317	116448403	57086	0.02876	ENSBTAG00000048921	116413475	116415908	lncRNA
5	block_303_chr_5	rs109513912	rs110659119	116391317	116448403	57086	0.02876	ENSBTAG00000050704	116385087	116399415	lncRNA
5	block_323_chr_5	rs43036671	rs41657101	119406813	119463301	56488	0.02941	ENSBTAG00000011098	119392379	119450153	TTLL8	protein_coding
5	block_323_chr_5	rs43036671	rs41657101	119406813	119463301	56488	0.02941	ENSBTAG00000021626	119451454	119473072	MLC1	protein_coding
6	block_30_chr_6	rs109435946	rs42928688	6399976	6482619	82643	0.03004	ENSBTAG00000006434	6233764	6435034	SYNPO2	protein_coding
6	block_30_chr_6	rs109435946	rs42928688	6399976	6482619	82643	0.03004	ENSBTAG00000055099	6435122	6444715	lncRNA
6	block_34_chr_6	rs43444992	rs41650750	7438139	7474743	36604	0.03695	ENSBTAG00000051854	7441167	7459597	lncRNA
6	block_48_chr_6	rs29016355	rs109535979	11539567	11577471	37904	0.02843	ENSBTAG00000017808	11555988	11639287	ARSJ	protein_coding
6	block_99_chr_6	rs41633202	rs108944781	22571656	22681971	110315	0.04652	ENSBTAG00000054853	22648797	22649060	processed_pseudogene
6	block_104_chr_6	rs42547296	rs41664505	23503327	23564107	60780	0.03172	ENSBTAG00000016005	23444708	23767842	PPP3CA	protein_coding
6	block_118_chr_6	rs108944957	rs110131710	29357249	29406846	49597	0.02815	ENSBTAG00000002081	29373117	29593444	BMPR1B	protein_coding
6	block_118_chr_6	rs108944957	rs110131710	29357249	29406846	49597	0.02815	ENSBTAG00000002084	29166321	29361530	UNC5C	protein_coding
6	block_173_chr_6	rs110435700	rs41983246	42004652	42037316	32664	0.02994	ENSBTAG00000004653	41984735	42116814	ADGRA3	protein_coding
6	block_345_chr_6	rs109614068	rs43476044	92911232	92955785	44553	0.03356	ENSBTAG00000010716	92951310	93291875	FRAS1	protein_coding
6	block_397_chr_6	rs110670051	rs109188808	104267648	104310525	42877	0.03092	ENSBTAG00000010875	104281506	104285802	MSX1	protein_coding
6	block_442_chr_6	rs43490816	rs41590968	113197600	113217685	20085	0.03791	ENSBTAG00000003766	113216655	113218143	BLOC1S4	protein_coding
6	block_451_chr_6	rs41574391	rs109657313	114785574	114812953	27379	0.04702	ENSBTAG00000014803	114791954	114816294	CPZ	protein_coding
7	block_31_chr_7	rs109207355	rs109551981	5535313	5587078	51765	0.03372	ENSBTAG00000012678	5543272	5566733	COLGALT1	protein_coding
7	block_31_chr_7	rs109207355	rs109551981	5535313	5587078	51765	0.03372	ENSBTAG00000018946	5568730	5586773	NIBAN3	protein_coding
7	block_61_chr_7	rs109815065	rs109755265	16688700	16720758	32058	0.04681	ENSBTAG00000000613	16714677	16752222	ELAVL1	protein_coding
7	block_61_chr_7	rs109815065	rs109755265	16688700	16720758	32058	0.04681	ENSBTAG00000015567	16680584	16695716	TIMM44	protein_coding
7	block_61_chr_7	rs109815065	rs109755265	16688700	16720758	32058	0.04681	ENSBTAG00000044869	16711356	16711431	bta-mir-2455	miRNA
7	block_61_chr_7	rs109815065	rs109755265	16688700	16720758	32058	0.04681	ENSBTAG00000049345	16712681	16712756	bta-mir-10178	miRNA
7	block_73_chr_7	rs110410267	rs110249839	20264097	20382516	118419	0.03676	ENSBTAG00000000710	20261476	20311632	PIP5K1C	protein_coding
7	block_73_chr_7	rs110410267	rs110249839	20264097	20382516	118419	0.03676	ENSBTAG00000008789	20353044	20358586	HMG20B	protein_coding
7	block_73_chr_7	rs110410267	rs110249839	20264097	20382516	118419	0.03676	ENSBTAG00000010373	20313628	20324899	CACTIN	protein_coding
7	block_73_chr_7	rs110410267	rs110249839	20264097	20382516	118419	0.03676	ENSBTAG00000014944	20334826	20343537	TBXA2R	protein_coding
7	block_73_chr_7	rs110410267	rs110249839	20264097	20382516	118419	0.03676	ENSBTAG00000014979	20369007	20378072	MFSD12	protein_coding
7	block_73_chr_7	rs110410267	rs110249839	20264097	20382516	118419	0.03676	ENSBTAG00000014982	20379062	20382521	C7H19orf71	protein_coding
7	block_73_chr_7	rs110410267	rs110249839	20264097	20382516	118419	0.03676	ENSBTAG00000050809	20346684	20350042	GIPC3	protein_coding
7	block_73_chr_7	rs110410267	rs110249839	20264097	20382516	118419	0.03676	ENSBTAG00000053812	20343967	20346465	protein_coding
7	block_166_chr_7	rs41575808	rs109886610	43085607	43105247	19640	0.04725	ENSBTAG00000047560	43101617	43102879	C2CD4C	protein_coding
7	block_222_chr_7	rs110504063	rs41627905	59101278	59173723	72445	0.0417	ENSBTAG00000004153	59111440	59114995	SCGB3A2	protein_coding
7	block_222_chr_7	rs110504063	rs41627905	59101278	59173723	72445	0.0417	ENSBTAG00000015465	59134895	59147099	C7H5orf46	protein_coding
7	block_291_chr_7	rs41613284	rs109190810	75350671	75380152	29481	0.04124	ENSBTAG00000050903	75358284	75359460	protein_coding
7	block_351_chr_7	rs109398264	rs41658542	95763928	95844936	81008	0.02889	ENSBTAG00000020843	95746303	95790112	PCSK1	protein_coding
7	block_351_chr_7	rs109398264	rs41658542	95763928	95844936	81008	0.02889	ENSBTAG00000049969	95791030	95955111	lncRNA
7	block_385_chr_7	rs43536043	rs41658074	106557340	106624724	67384	0.03197	ENSBTAG00000016515	106497219	106784981	EFNA5	protein_coding
7	block_392_chr_7	rs41565850	rs41619208	108132999	108207357	74358	0.02814	ENSBTAG00000003051	107827212	108280766	FER	protein_coding
8	block_22_chr_8	rs41592207	rs110338031	8468112	8523201	55089	0.02854	ENSBTAG00000000500	8476519	8542392	PINX1	protein_coding
8	block_23_chr_8	rs111028471	rs41622366	8618577	8658263	39686	0.03826	ENSBTAG00000004134	8587781	8618663	C8H8orf74	protein_coding
8	block_27_chr_8	rs41638903	rs110713930	9477100	9576222	99122	0.03221	ENSBTAG00000017232	9440963	9630218	KIF13B	protein_coding
8	block_159_chr_8	rs43553193	rs41654687	43970992	43998136	27144	0.02967	ENSBTAG00000010976	43770176	43988755	KANK1	protein_coding
8	block_416_chr_8	rs110707227	rs110431913	111318888	111343181	24293	0.02839	ENSBTAG00000051710	111317608	111320675	lncRNA
9	block_53_chr_9	rs42754745	rs41657156	15495802	15528008	32206	0.02916	ENSBTAG00000016751	15461668	15554235	MYO6	protein_coding
9	rs29012613_9_chr_	rs29012613	rs29012613	19914423	19914423	1	0.04295	ENSBTAG00000012096	19804029	20074759	BCKDHB	protein_coding
9	block_143_chr_9	rs110792419	rs109562368	38688003	38708085	20082	0.03666	ENSBTAG00000011851	38628871	38780948	FYN	protein_coding
9	block_188_chr_9	rs41575824	rs42411844	53639845	53659493	19648	0.06697	ENSBTAG00000007989	53645198	53646339	FUT9	protein_coding
9	block_224_chr_9	rs110946081	rs109358021	62571414	62596000	24586	0.03065	ENSBTAG00000021663	62573175	62585417	SMIM8	protein_coding
9	block_238_chr_9	rs43706673	rs109217503	65428890	65449563	20673	0.03316	ENSBTAG00000013591	65426509	65543729	CYB5R4	protein_coding
9	block_244_chr_9	rs41623532	rs41662459	69236440	69270585	34145	0.028	ENSBTAG00000000240	69203273	69325807	AKAP7	protein_coding
10	block_44_chr_10	rs43617854	rs109308416	12438859	12465372	26513	0.03037	ENSBTAG00000015155	12436032	12464228	HACD3	protein_coding
10	block_44_chr_10	rs43617854	rs109308416	12438859	12465372	26513	0.03037	ENSBTAG00000042761	12458565	12458672	Y_RNA	misc_RNA
10	block_264_chr_10	rs110268024	rs41624664	69208468	69259877	51409	0.03395	ENSBTAG00000014741	69215730	69224687	OTX2	protein_coding
10	block_392_chr_10	rs110572986	rs109837613	99680118	99710643	30525	0.04056	ENSBTAG00000001124	99667901	99724558	GALC	protein_coding
11	block_50_chr_11	rs109115527	rs109188527	9537410	9566673	29263	0.03393	ENSBTAG00000015575	9482775	9669064	TACR1	protein_coding
11	block_70_chr_11	rs110341524	rs109073558	13441766	13510010	68244	0.06538	ENSBTAG00000010605	13482524	13508824	VAX2	protein_coding
11	block_70_chr_11	rs110341524	rs109073558	13441766	13510010	68244	0.06538	ENSBTAG00000010620	13454348	13480401	ATP6V1B1	protein_coding
11	block_70_chr_11	rs110341524	rs109073558	13441766	13510010	68244	0.06538	ENSBTAG00000010623	13434822	13442574	ANKRD53	protein_coding
11	block_70_chr_11	rs110341524	rs109073558	13441766	13510010	68244	0.06538	ENSBTAG00000051968	13509110	13509305	misc_RNA
11	block_77_chr_11	rs110275298	rs43665542	15838674	15858872	20198	0.03664	ENSBTAG00000019839	15473232	15930122	LTBP1	protein_coding
11	block_132_chr_11	rs43671448	rs43677722	28492327	28518141	25814	0.03001	ENSBTAG00000020614	28303215	28635155	PRKCE	protein_coding
11	block_134_chr_11	rs108982955	rs43673200	28896192	28964630	68438	0.02913	ENSBTAG00000004105	28928747	28933551	TMEM247	protein_coding
11	block_204_chr_11	rs29020516	rs110397745	50142429	50202868	60439	0.03288	ENSBTAG00000052823	50126392	50191346	lncRNA
13	block_10_chr_13	rs42448837	rs42444116	2064084	2133989	69905	0.02843	ENSBTAG00000050292	2021029	2105092	lncRNA
13	block_68_chr_13	rs110403521	rs109869165	18870958	18892498	21540	0.02824	ENSBTAG00000014991	18484975	19062784	PARD3	protein_coding
13	block_231_chr_13	rs41703753	rs110696233	60152518	60175928	23410	0.03204	ENSBTAG00000021885	60118678	60153362	RSPO4	protein_coding
13	block_289_chr_13	rs41715691	rs109321555	73757736	73784937	27201	0.03038	ENSBTAG00000016122	73747849	73759591	PIGT	protein_coding
13	block_289_chr_13	rs41715691	rs109321555	73757736	73784937	27201	0.03038	ENSBTAG00000016127	73763287	73766219	SPINT3	protein_coding
13	block_289_chr_13	rs41715691	rs109321555	73757736	73784937	27201	0.03038	ENSBTAG00000053258	73776787	73777702	pseudogene
13	block_304_chr_13	rs42799141	rs110815518	76117977	76142546	24569	0.03967	ENSBTAG00000007489	76036719	76152407	NCOA3	protein_coding
14	block_1_chr_14	rs109752439	rs41630614	305780	330256	24476	0.03035	ENSBTAG00000012353	309282	313478	ZNF34	protein_coding
14	block_1_chr_14	rs109752439	rs41630614	305780	330256	24476	0.03035	ENSBTAG00000026327	321231	324177	RPL8	protein_coding
14	block_77_chr_14	rs110981704	rs109929438	9063069	9098173	35104	0.03521	ENSBTAG00000007736	9074043	9111806	protein_coding
14	block_77_chr_14	rs110981704	rs109929438	9063069	9098173	35104	0.03521	ENSBTAG00000034196	9051285	9075583	HHLA1	protein_coding
14	block_105_chr_14	rs41570832	rs41614771	15454870	15481849	26979	0.03604	ENSBTAG00000020407	15383762	15553664	MTSS1	protein_coding
14	block_181_chr_14	rs41737077	rs41737059	30803553	30837616	34063	0.0388	ENSBTAG00000011981	30827578	30862362	MYBL1	protein_coding
14	block_181_chr_14	rs41737077	rs41737059	30803553	30837616	34063	0.0388	ENSBTAG00000053995	30822296	30822402	U6	snRNA
14	block_199_chr_14	rs42382244	rs43089152	38274985	38304478	29493	0.04209	ENSBTAG00000004411	38295064	38345541	CRISPLD1	protein_coding
14	block_213_chr_14	rs43576496	rs41661153	41944778	41965713	20935	0.05005	ENSBTAG00000016284	41937221	41996546	IL7	protein_coding
15	block_192_chr_15	rs109476806	rs110276961	51981969	52018352	36383	0.03108	ENSBTAG00000001280	51880779	52022991	CLPB	protein_coding
15	block_231_chr_15	rs29012408	rs42818341	63614538	63641839	27301	0.02855	ENSBTAG00000014399	63556795	63634185	QSER1	protein_coding
15	block_267_chr_15	rs110384360	rs109853015	74165328	74193545	28217	0.03144	ENSBTAG00000008465	74175866	74199580	ACCS	protein_coding
15	block_267_chr_15	rs110384360	rs109853015	74165328	74193545	28217	0.03144	ENSBTAG00000012053	74160726	74173076	ACCSL	protein_coding
16	block_58_chr_16	rs41609057	rs29011333	15266610	15290752	24142	0.02782	ENSBTAG00000008420	15166537	15630781	BRINP3	protein_coding
16	block_74_chr_16	rs42542660	rs110103457	20367174	20404280	37106	0.03186	ENSBTAG00000050133	20388581	20399097	lncRNA
16	block_156_chr_16	rs41811813	rs109608399	41217175	41244707	27532	0.04103	ENSBTAG00000016080	41205338	41473842	VPS13D	protein_coding
16	rs41634228_16_chr_	rs41634228	rs41634228	73257921	73257921	1	0.02951	ENSBTAG00000046723	73169607	73359804	SYT14	protein_coding
16	block_342_chr_16	rs41664179	rs41664177	77631297	77660465	29168	0.05029	ENSBTAG00000023144	77600496	77669271	PTPRC	protein_coding
16	block_342_chr_16	rs41664179	rs41664177	77631297	77660465	29168	0.05029	ENSBTAG00000046345	77633793	77634326	protein_coding
17	block_20_chr_17	rs41832749	rs41832788	4192418	4223607	31189	0.03549	ENSBTAG00000000281	4218300	4297890	MND1	protein_coding
17	rs41625685_17_chr_	rs41625685	rs41625685	40371968	40371968	1	0.03015	ENSBTAG00000010306	40348027	40475237	RXFP1	protein_coding
17	block_231_chr_17	rs42948217	rs41843533	57652704	57676485	23781	0.04304	ENSBTAG00000044119	57231745	57664911	KSR2	protein_coding
17	rs111021391_17_chr_	rs111021391	rs111021391	70590385	70590385	1	0.03647	ENSBTAG00000012851	70570574	70620771	SLC5A1	protein_coding
18	block_6_chr_18	rs110151403	rs109766638	2132264	2159912	27648	0.07072	ENSBTAG00000012216	2123144	2146610	MLKL	protein_coding
18	block_6_chr_18	rs110151403	rs109766638	2132264	2159912	27648	0.07072	ENSBTAG00000012222	2151216	2205687	FA2H	protein_coding
18	block_106_chr_18	rs109980096	rs110020608	25602368	25628544	26176	0.04079	ENSBTAG00000038141	25595310	25641535	ADGRG1	protein_coding
18	block_172_chr_18	rs109074834	rs41581635	43300251	43332104	31853	0.04583	ENSBTAG00000004864	43316097	43398266	CEP89	protein_coding
19	block_16_chr_19	rs29021008	rs41584906	7224772	7250802	26030	0.02769	ENSBTAG00000021292	7149813	7279813	ANKFN1	protein_coding
19	block_25_chr_19	rs29018185	rs41600341	10668027	10691042	23015	0.02918	ENSBTAG00000011623	10674179	10802801	VMP1	protein_coding
19	block_25_chr_19	rs29018185	rs41600341	10668027	10691042	23015	0.02918	ENSBTAG00000016710	10665274	10674104	PTRH2	protein_coding
19	block_62_chr_19	rs41641514	rs110825575	18650667	18683330	32663	0.03112	ENSBTAG00000009353	18674661	18683264	EVI2B	protein_coding
19	block_62_chr_19	rs41641514	rs110825575	18650667	18683330	32663	0.03112	ENSBTAG00000009354	18667321	18671399	EVI2A	protein_coding
19	block_62_chr_19	rs41641514	rs110825575	18650667	18683330	32663	0.03112	ENSBTAG00000050242	18620091	18651456	protein_coding
19	block_80_chr_19	rs41905232	rs110686608	23151905	23180418	28513	0.03884	ENSBTAG00000000267	23080158	23280691	SMG6	protein_coding
19	block_159_chr_19	rs43729464	rs29015754	41594056	41619572	25516	0.05875	ENSBTAG00000013685	41614120	41619258	KRT31	protein_coding
19	block_159_chr_19	rs43729464	rs29015754	41594056	41619572	25516	0.05875	ENSBTAG00000037560	41593205	41597632	KRT34	protein_coding
20	block_143_chr_20	rs42543872	rs42543895	38543545	38571692	28147	0.06682	ENSBTAG00000023529	38369475	38572090	SPEF2	protein_coding
21	block_81_chr_21	rs41640669	rs41582924	20568083	20594817	26734	0.03938	ENSBTAG00000019954	20576003	20684305	ABHD2	protein_coding
21	block_82_chr_21	rs110429530	rs41973071	20695391	20731657	36266	0.03159	ENSBTAG00000009097	20722980	20787646	FANCI	protein_coding
21	block_82_chr_21	rs110429530	rs41973071	20695391	20731657	36266	0.03159	ENSBTAG00000033721	20695021	20709983	RLBP1	protein_coding
21	block_85_chr_21	rs109020518	rs110678397	20987175	21017431	30256	0.03294	ENSBTAG00000002418	21011537	21053211	TICRR	protein_coding
21	block_99_chr_21	rs110357607	rs41970939	24508384	24537688	29304	0.03176	ENSBTAG00000004645	24144715	24509041	ADAMTSL3	protein_coding
21	block_99_chr_21	rs110357607	rs41970939	24508384	24537688	29304	0.03176	ENSBTAG00000018004	24498758	24614322	SH3GL3	protein_coding
21	block_143_chr_21	rs29016827	rs110819139	35028158	35060758	32600	0.03045	ENSBTAG00000021291	35027776	35267297	STXBP6	protein_coding
21	block_232_chr_21	rs41584223	rs109254014	59446046	59483270	37224	0.03082	ENSBTAG00000004063	59460078	59465438	SERPINA5	protein_coding
21	block_232_chr_21	rs41584223	rs109254014	59446046	59483270	37224	0.03082	ENSBTAG00000046540	59435015	59482654	SERPINA3-1	protein_coding
21	rs29011028_21_chr_	rs29011028	rs29011028	66700229	66700229	1	0.03384	ENSBTAG00000020192	66678556	66817662	PPP2R5C	protein_coding
22	block_17_chr_22	rs110939018	rs110031217	5109500	5134078	24578	0.03427	ENSBTAG00000019832	5091037	5184321	TGFBR2	protein_coding
22	block_166_chr_22	rs41644452	rs42013343	46740639	46762508	21869	0.06221	ENSBTAG00000013117	45924535	46818511	CACNA2D3	protein_coding
22	block_178_chr_22	rs42013317	rs110609338	48961009	48986766	25757	0.02912	ENSBTAG00000000671	48984160	48989507	PARP3	protein_coding
22	block_178_chr_22	rs42013317	rs110609338	48961009	48986766	25757	0.02912	ENSBTAG00000013442	48976816	48978925	GPR62	protein_coding
22	block_178_chr_22	rs42013317	rs110609338	48961009	48986766	25757	0.02912	ENSBTAG00000018622	48966805	48976850	PCBP4	protein_coding
22	block_178_chr_22	rs42013317	rs110609338	48961009	48986766	25757	0.02912	ENSBTAG00000037377	48962168	48965810	ABHD14B	protein_coding
22	block_244_chr_22	rs110904383	rs109051741	60225202	60258838	33636	0.0644	ENSBTAG00000009159	60240226	60280068	PLXNA1	protein_coding
23	block_19_chr_23	rs110708312	rs109793138	4861885	4892090	30205	0.04868	ENSBTAG00000025718	4789382	4986934	HMGCLL1	protein_coding
23	block_59_chr_23	rs109152735	rs109130384	15338295	15367501	29206	0.07917	ENSBTAG00000014211	15366276	15417429	FOXP4	protein_coding
23	block_96_chr_23	rs41587573	rs109493269	24823737	24863032	39295	0.02897	ENSBTAG00000017810	24842515	24883070	EFHC1	protein_coding
23	block_96_chr_23	rs41587573	rs109493269	24823737	24863032	39295	0.02897	ENSBTAG00000025494	24783271	24826623	PAQR8	protein_coding
24	block_127_chr_24	rs41574914	rs29020396	31675938	31701303	25365	0.03626	ENSBTAG00000007383	31380664	31692928	ZNF521	protein_coding
24	block_236_chr_24	rs110717504	rs110870395	60093951	60176845	82894	0.03574	ENSBTAG00000001739	59887828	60100758	CDH20	protein_coding
25	block_43_chr_25	rs109558512	rs109583598	7905066	7944597	39531	0.02899	ENSBTAG00000013858	7883250	7907314	C25H16orf72	protein_coding
25	block_55_chr_25	rs42055965	rs109346628	11164460	11184503	20043	0.04149	ENSBTAG00000026371	10682180	11276292	SNX29	protein_coding
25	block_163_chr_25	rs109405213	rs109140856	34536825	34556876	20051	0.03138	ENSBTAG00000005448	34549739	34572255	protein_coding
26	block_16_chr_26	rs41650535	rs110308884	7443726	7467841	24115	0.03047	ENSBTAG00000018404	6899619	8313722	PRKG1	protein_coding
26	block_17_chr_26	rs42082618	rs41568479	7546365	7567042	20677	0.03212	ENSBTAG00000018404	6899619	8313722	PRKG1	protein_coding
26	block_26_chr_26	rs110924756	rs110358830	9836117	9867428	31311	0.0557	ENSBTAG00000048748	9806435	9850770	lncRNA
26	block_43_chr_26	rs110970157	rs41661672	13899525	13934098	34573	0.02836	ENSBTAG00000019759	13881642	13976189	IDE	protein_coding
26	block_47_chr_26	rs109184928	rs109653528	14684949	14710058	25109	0.04049	ENSBTAG00000016918	14623780	14803157	MYOF	protein_coding
26	block_60_chr_26	rs42084620	rs41606817	17606022	17628730	22708	0.03481	ENSBTAG00000021358	17515994	17644805	BLNK	protein_coding
26	block_100_chr_26	rs41604819	rs41636627	27902998	27933010	30012	0.03781	ENSBTAG00000007948	27553353	27912060	SORCS1	protein_coding
26	block_137_chr_26	rs109875268	rs110822681	37010533	37042629	32096	0.0456	ENSBTAG00000000765	37019951	37039831	PNLIPRP2	protein_coding
26	block_187_chr_26	rs109450346	rs42101711	46765748	46787804	22056	0.05165	ENSBTAG00000031890	46392481	46948728	DOCK1	protein_coding
26	block_193_chr_26	rs110105463	rs111008529	48859017	48880894	21877	0.05095	ENSBTAG00000050386	48818674	49095122	MGMT	protein_coding
26	block_199_chr_26	rs109629359	rs42500277	50846722	50879471	32749	0.04017	ENSBTAG00000019919	50822833	50865778	protein_coding
27	block_26_chr_27	rs42437286	rs42439066	8639941	8672918	32977	0.06337	ENSBTAG00000049151	8664638	8667964	lncRNA
27	block_90_chr_27	rs43331419	rs43331380	23526240	23560002	33762	0.03654	ENSBTAG00000015541	23395827	23916949	DLC1	protein_coding
27	block_150_chr_27	rs109654144	rs109386328	36575886	36596672	20786	0.04314	ENSBTAG00000027629	36565855	36576598	protein_coding
27	block_150_chr_27	rs109654144	rs109386328	36575886	36596672	20786	0.04314	ENSBTAG00000054394	36583409	36610753	protein_coding
27	block_157_chr_27	rs109746481	rs109807388	38303470	38327324	23854	0.03522	ENSBTAG00000001186	38246299	38307830	SH2D4A	protein_coding
27	block_157_chr_27	rs109746481	rs109807388	38303470	38327324	23854	0.03522	ENSBTAG00000036777	38318224	38318340	5S_rRNA	rRNA
28	block_63_chr_28	rs41651370	rs42134489	15383786	15472249	88463	0.04186	ENSBTAG00000003189	15463074	15571693	CCDC6	protein_coding
28	block_63_chr_28	rs41651370	rs42134489	15383786	15472249	88463	0.04186	ENSBTAG00000019792	15308624	15393525	SLC16A9	protein_coding
28	block_63_chr_28	rs41651370	rs42134489	15383786	15472249	88463	0.04186	ENSBTAG00000044888	15386293	15386367	bta-mir-2403	miRNA
28	block_63_chr_28	rs41651370	rs42134489	15383786	15472249	88463	0.04186	ENSBTAG00000050076	15415504	15432426	MRLN	protein_coding
28	block_63_chr_28	rs41651370	rs42134489	15383786	15472249	88463	0.04186	ENSBTAG00000054999	15386724	15387932	protein_coding
28	block_68_chr_28	rs110036421	rs42137930	15913942	15942493	28551	0.03464	ENSBTAG00000050189	15866749	15951588	protein_coding
28	block_98_chr_28	rs41606880	rs110462383	24274916	24372375	97459	0.04028	ENSBTAG00000010932	24248418	24296594	DNAJC12	protein_coding
28	block_98_chr_28	rs41606880	rs110462383	24274916	24372375	97459	0.04028	ENSBTAG00000051268	24329477	24332103	protein_coding
28	block_122_chr_28	rs41653441	rs110651855	27989609	28026235	36626	0.0304	ENSBTAG00000021499	27964205	27997628	PSAP	protein_coding
28	block_136_chr_28	rs110665327	rs110789957	33039670	33061971	22301	0.02928	ENSBTAG00000013300	32616314	33387186	KCNMA1	protein_coding
28	block_156_chr_28	rs42150562	rs41646393	37128017	37155974	27957	0.03894	ENSBTAG00000009587	36896430	38132186	NRG3	protein_coding
28	block_162_chr_28	rs109982860	rs41615110	37709725	37747210	37485	0.05132	ENSBTAG00000009587	36896430	38132186	NRG3	protein_coding
28	block_181_chr_28	rs42151171	rs29024828	41716255	41752572	36317	0.03202	ENSBTAG00000019194	41650333	41763371	SHLD2	protein_coding
29	block_8_chr_29	rs109387887	rs110886484	2553781	2577613	23832	0.02931	ENSBTAG00000004081	1996704	2635494	FAT3	protein_coding
29	block_8_chr_29	rs109387887	rs110886484	2553781	2577613	23832	0.02931	ENSBTAG00000042920	2559351	2559459	U6	snRNA
29	block_75_chr_29	rs41575769	rs29021971	24098223	24117260	19037	0.07054	ENSBTAG00000048576	24002708	24295209	protein_coding
29	block_92_chr_29	rs109427317	rs29026721	28154066	28190477	36411	0.0312	ENSBTAG00000009412	28116611	28154372	SIAE	protein_coding
29	block_92_chr_29	rs109427317	rs29026721	28154066	28190477	36411	0.0312	ENSBTAG00000033464	28154527	28168618	SPA17	protein_coding
29	rs110643010_29_chr_	rs110643010	rs110643010	36519917	36519917	1	0.04448	ENSBTAG00000010411	36515554	36534251	ADAMTS8	protein_coding
29	block_163_chr_29	rs110311277	rs108940218	41725399	41749646	24247	0.04543	ENSBTAG00000003236	41708650	41738156	protein_coding
29	block_202_chr_29	rs109595049	rs109039119	49563285	49601476	38191	0.02955	ENSBTAG00000010447	49598330	49637383	LSP1	protein_coding
29	block_202_chr_29	rs109595049	rs109039119	49563285	49601476	38191	0.02955	ENSBTAG00000022158	49579179	49594887	TNNT3	protein_coding
29	block_202_chr_29	rs109595049	rs109039119	49563285	49601476	38191	0.02955	ENSBTAG00000048504	49596205	49601869	protein_coding
30	block_8_chr_30	rs42202984	rs42204099	136572031	136601015	28984	0.04941	ENSBTAG00000027841	136346606	136694634	protein_coding
30	block_14_chr_30	rs109460397	rs29016272	138539853	138566171	26318	0.03999	ENSBTAG00000022150	138519497	138540790	MXRA5	protein_coding
30	block_15_chr_30	rs109907786	rs110047509	138757031	138786335	29304	0.03518	ENSBTAG00000008114	138754709	138785187	CD99	protein_coding
QTL overlapped with the top 0.001% markers in percentage of variance explained
Chromosome	Marker	Start_SNP (marker)	END_SNP (marker)	Start_Position (marker)	End_Position (marker)	Size_in_kb(marker)	%Variance_explained	QTL_Type	Start_Position (QTL)	End_Position (QTL)	QTL_ID	Trait_associated	Trait_Abreviation	Breeds_found	Tag_SNP
1	block_14_chr_1	rs110593395	rs29024375	4250046	4309205	59159	0.03595	Production	4250044	4250048	QTL_ID=66725	trait=Body_weight_(yearling)	Abbrev=W365	breed=Hanwoo	rs378493804
1	block_14_chr_1	rs110593395	rs29024375	4250046	4309205	59159	0.03595	Production	4276063	4276067	QTL_ID=66789	trait=Body_weight_(yearling)	Abbrev=W365	breed=charolais	rs43212771
1	block_14_chr_1	rs110593395	rs29024375	4250046	4309205	59159	0.03595	Reproduction	4253948	4253952	QTL_ID=176659	trait=First_service_conception	Abbrev=FSC	breed=holstein	rs132784449
1	block_14_chr_1	rs110593395	rs29024375	4250046	4309205	59159	0.03595	Reproduction	4253948	4253952	QTL_ID=176888	trait=First_service_conception	Abbrev=FSC	breed=holstein	rs43211381,rs41633082
1	block_14_chr_1	rs110593395	rs29024375	4250046	4309205	59159	0.03595	Reproduction	4253948	4253952	QTL_ID=212069	trait=First_service_conception	Abbrev=FSC	breed=blonde_d'aquitaine	rs43765148,rs109811373,rs43210941
1	block_14_chr_1	rs110593395	rs29024375	4250046	4309205	59159	0.03595	Reproduction	4253948	4253952	QTL_ID=212416	trait=Inseminations_per_conception	Abbrev=CONCEPT	breed=holstein	rs41614480
1	block_224_chr_1	rs41255415	rs108992751	66150690	66188904	38214	0.03087	Reproduction	66188902	66188906	QTL_ID=173355	trait=Daughter_pregnancy_rate	Abbrev=DPR	breed=holstein	rs43243872
1	block_311_chr_1	rs42455329	rs41613169	91673661	91758979	85318	0.03922	Health	91727149	91727153	QTL_ID=95654	trait=Bovine_respiratory_disease_susceptibility	Abbrev=BRDS	breed=holstein	rs29023726
1	block_311_chr_1	rs42455329	rs41613169	91673661	91758979	85318	0.03922	Production	91706586	91706590	QTL_ID=66781	trait=Body_weight_(yearling)	Abbrev=W365	breed=holstein	rs41638858
1	block_311_chr_1	rs42455329	rs41613169	91673661	91758979	85318	0.03922	Production	91706586	91706590	QTL_ID=66782	trait=Body_weight_gain	Abbrev=BWG	breed=holstein	rs29015093
1	block_392_chr_1	rs41632723	rs41751194	111566373	111654919	88546	0.04256	Milk	111577411	111577415	QTL_ID=155361	trait=Milk_caproic_acid_content	Abbrev=MFA-C6:0	breed=Valdostana_Red_Pied	rs42746298
1	block_392_chr_1	rs41632723	rs41751194	111566373	111654919	88546	0.04256	Milk	111577411	111577415	QTL_ID=155514	trait=Milk_caprylic_acid_content	Abbrev=MFA-C8:0	breed=holstein	rs42746298
1	block_392_chr_1	rs41632723	rs41751194	111566373	111654919	88546	0.04256	Production	111654917	111654921	QTL_ID=20986	trait=Average_daily_feed_intake	Abbrev=ADFI	breed=holstein	rs43236849
1	block_408_chr_1	rs109483880	rs29019947	116654067	116725563	71496	0.05157	Reproduction	116678367	116678371	QTL_ID=212443	trait=Inseminations_per_conception	Abbrev=CONCEPT	breed=holstein	rs137041533
1	block_418_chr_1	rs43265648	rs41635984	118603687	118638525	34838	0.03265	Health	118638523	118638527	QTL_ID=16300	trait=Johne's_disease_tolerance	Abbrev=JDTOL	breed=holstein	rs41639303
1	block_418_chr_1	rs43265648	rs41635984	118603687	118638525	34838	0.03265	Production	118603685	118603689	QTL_ID=66806	trait=Body_weight_(yearling)	Abbrev=W365	breed=holstein	rs41639303
1	block_418_chr_1	rs43265648	rs41635984	118603687	118638525	34838	0.03265	Production	118603685	118603689	QTL_ID=66807	trait=Body_weight_(yearling)	Abbrev=W365	breed=holstein	rs41639303
1	block_418_chr_1	rs43265648	rs41635984	118603687	118638525	34838	0.03265	Production	118603685	118603689	QTL_ID=66808	trait=Body_weight_gain	Abbrev=BWG	breed=holstein	rs41639303
1	block_418_chr_1	rs43265648	rs41635984	118603687	118638525	34838	0.03265	Production	118603685	118603689	QTL_ID=66809	trait=Body_weight_gain	Abbrev=BWG	breed=holstein	rs41639303
1	block_418_chr_1	rs43265648	rs41635984	118603687	118638525	34838	0.03265	Production	118638523	118638527	QTL_ID=66303	trait=Body_weight_(yearling)	Abbrev=W365	breed=holstein	rs133142877
1	block_418_chr_1	rs43265648	rs41635984	118603687	118638525	34838	0.03265	Production	118638523	118638527	QTL_ID=66757	trait=Body_weight_(yearling)	Abbrev=W365	breed=holstein	rs41639303
1	block_418_chr_1	rs43265648	rs41635984	118603687	118638525	34838	0.03265	Production	118638523	118638527	QTL_ID=66758	trait=Body_weight_gain	Abbrev=BWG	breed=holstein	rs110172425
1	block_418_chr_1	rs43265648	rs41635984	118603687	118638525	34838	0.03265	Production	118638523	118638527	QTL_ID=66759	trait=Body_weight_gain	Abbrev=BWG	breed=holstein	rs43271516
1	block_418_chr_1	rs43265648	rs41635984	118603687	118638525	34838	0.03265	Production	118638523	118638527	QTL_ID=66760	trait=Body_weight_gain	Abbrev=BWG	breed=holstein	rs110971315
1	block_577_chr_1	rs109668017	rs41617748	156644833	156682865	38032	0.04994	Milk	156682863	156682867	QTL_ID=25762	trait=Milk_fat_yield	Abbrev=FY	breed=jersey	rs43276300
2	block_87_chr_2	rs110203175	rs110892921	21370144	21391926	21782	0.02846	Production	21391924	21391928	QTL_ID=23640	trait=Average_daily_gain	Abbrev=ADG	breed=holstein	rs110783123
2	block_87_chr_2	rs110203175	rs110892921	21370144	21391926	21782	0.02846	Production	21391924	21391928	QTL_ID=66862	trait=Body_weight_(yearling)	Abbrev=W365	breed=holstein	rs42209697
2	rs109732000_2_chr_	rs109732000	rs109732000	49703365	49703365	1	0.03688	Milk	49703363	49703367	QTL_ID=115848	trait=Milk_glycosylated_kappa-casein_percentage	Abbrev=MGKCASP	breed=holstein	rs43102294
2	block_360_chr_2	rs41644177	rs110594836	105556193	105589302	33109	0.03502	Reproduction	105556191	105556195	QTL_ID=30597	trait=Inhibin_level	Abbrev=INHIB	breed=holstein	rs29027359
2	block_410_chr_2	rs110177119	rs41598273	116395928	116423023	27095	0.04698	Milk	116423021	116423025	QTL_ID=69756	trait=Milk_zinc_content	Abbrev=MZN	breed=holstein	rs109395536
2	rs41256658_2_chr_	rs41256658	rs41256658	123285701	123285701	1	0.0336	Production	123285699	123285703	QTL_ID=66873	trait=Body_weight_(yearling)	Abbrev=W365	breed=holstein	rs136958979
2	block_451_chr_2	rs109309637	rs109780234	127218611	127238953	20342	0.0317	Milk	127231883	127231887	QTL_ID=111308	trait=Milk_kappa-casein_percentage	Abbrev=MKCASP	breed=	rs43210602
3	block_108_chr_3	rs109542056	rs29012800	35139604	35171112	31508	0.04811	Exterior	35139602	35139606	QTL_ID=28109	trait=Dairy_form	Abbrev=DYF	breed=holstein	rs43101620,rs110769771
3	block_108_chr_3	rs109542056	rs29012800	35139604	35171112	31508	0.04811	Exterior	35139602	35139606	QTL_ID=28112	trait=Angularity	Abbrev=ANG	breed=holstein	rs109050772,rs42634055
3	block_134_chr_3	rs41590454	rs29025951	44803996	44825241	21245	0.03251	Exterior	44803994	44803998	QTL_ID=31044	trait=Angularity	Abbrev=ANG	breed=Angus	rs43350087
3	block_134_chr_3	rs41590454	rs29025951	44803996	44825241	21245	0.03251	Milk	44803994	44803998	QTL_ID=25789	trait=Milk_fat_yield	Abbrev=FY	breed=holstein	rs109533386
3	block_134_chr_3	rs41590454	rs29025951	44803996	44825241	21245	0.03251	Milk	44825239	44825243	QTL_ID=14918	trait=Milk_protein_yield	Abbrev=PY	breed=brown_swiss	rs109915247
3	block_134_chr_3	rs41590454	rs29025951	44803996	44825241	21245	0.03251	Milk	44825239	44825243	QTL_ID=175332	trait=Milk_protein_yield	Abbrev=PY	breed=holstein	rs109907543
3	block_136_chr_3	rs43117607	rs42586854	46613397	46680174	66777	0.03064	Milk	46640789	46640793	QTL_ID=39779	trait=Milk_fat_yield	Abbrev=FY	breed=holstein	rs109790086
3	block_136_chr_3	rs43117607	rs42586854	46613397	46680174	66777	0.03064	Milk	46640789	46640793	QTL_ID=39780	trait=Milk_yield	Abbrev=MY	breed=holstein	rs109790086
3	block_136_chr_3	rs43117607	rs42586854	46613397	46680174	66777	0.03064	Milk	46640789	46640793	QTL_ID=39782	trait=Milk_protein_yield	Abbrev=PY	breed=holstein	rs109790086
3	block_136_chr_3	rs43117607	rs42586854	46613397	46680174	66777	0.03064	Milk	46680172	46680176	QTL_ID=39784	trait=Milk_fat_yield	Abbrev=FY	breed=holstein	rs109790086
3	block_136_chr_3	rs43117607	rs42586854	46613397	46680174	66777	0.03064	Milk	46680172	46680176	QTL_ID=39785	trait=Milk_yield	Abbrev=MY	breed=holstein	rs109790086
3	block_136_chr_3	rs43117607	rs42586854	46613397	46680174	66777	0.03064	Milk	46680172	46680176	QTL_ID=39787	trait=Milk_protein_yield	Abbrev=PY	breed=holstein	rs109790086
3	block_136_chr_3	rs43117607	rs42586854	46613397	46680174	66777	0.03064	Production	46640789	46640793	QTL_ID=39781	trait=Net_merit	Abbrev=NM	breed=holstein	rs109790086
3	block_136_chr_3	rs43117607	rs42586854	46613397	46680174	66777	0.03064	Production	46680172	46680176	QTL_ID=39786	trait=Net_merit	Abbrev=NM	breed=holstein	rs109790086
3	block_136_chr_3	rs43117607	rs42586854	46613397	46680174	66777	0.03064	Reproduction	46640789	46640793	QTL_ID=39783	trait=Calving_ease	Abbrev=CALEASE	breed=holstein	rs109790086
3	block_136_chr_3	rs43117607	rs42586854	46613397	46680174	66777	0.03064	Reproduction	46680172	46680176	QTL_ID=39788	trait=Calving_ease	Abbrev=CALEASE	breed=holstein	rs109790086
3	block_137_chr_3	rs41624161	rs42967999	46986210	47013530	27320	0.08996	Exterior	47013528	47013532	QTL_ID=39799	trait=Rump_angle	Abbrev=RANG	breed=holstein	rs109460728
3	block_137_chr_3	rs41624161	rs42967999	46986210	47013530	27320	0.08996	Milk	47013528	47013532	QTL_ID=39795	trait=Milk_fat_yield	Abbrev=FY	breed=holstein	rs109460728
3	block_137_chr_3	rs41624161	rs42967999	46986210	47013530	27320	0.08996	Milk	47013528	47013532	QTL_ID=39796	trait=Milk_yield	Abbrev=MY	breed=holstein	rs109460728
3	block_137_chr_3	rs41624161	rs42967999	46986210	47013530	27320	0.08996	Milk	47013528	47013532	QTL_ID=39798	trait=Milk_protein_yield	Abbrev=PY	breed=holstein	rs109460728
3	block_137_chr_3	rs41624161	rs42967999	46986210	47013530	27320	0.08996	Milk	.	.	QTL_ID=105587	trait=Milk_protein_percentage	Abbrev=PP	breed=charolais,chianina,gelbvieh,hereford,holstein,limousin,piedmontese,red_angus,simmental,Angus,Maine-Anjou	rs42967999
3	block_137_chr_3	rs41624161	rs42967999	46986210	47013530	27320	0.08996	Production	47013528	47013532	QTL_ID=39797	trait=Net_merit	Abbrev=NM	breed=holstein	rs109460728
3	block_137_chr_3	rs41624161	rs42967999	46986210	47013530	27320	0.08996	Production	.	.	QTL_ID=5321	trait=Residual_feed_intake	Abbrev=RFI	breed=holstein	rs42967999
3	block_137_chr_3	rs41624161	rs42967999	46986210	47013530	27320	0.08996	Reproduction	47013528	47013532	QTL_ID=39794	trait=Calving_ease_(maternal)	Abbrev=CALEASE	breed=holstein	rs109460728
3	block_137_chr_3	rs41624161	rs42967999	46986210	47013530	27320	0.08996	Reproduction	47013528	47013532	QTL_ID=39800	trait=Calving_ease	Abbrev=CALEASE	breed=holstein	rs109460728
3	block_144_chr_3	rs43339412	rs110384429	48234094	48285929	51835	0.04588	Production	48234092	48234096	QTL_ID=164356	trait=Body_weight_(birth)	Abbrev=BW	breed=holstein	rs41596889
3	block_193_chr_3	rs42867941	rs43702513	64174324	64239387	65063	0.03627	Milk	.	.	QTL_ID=2443	trait=Milk_protein_percentage	Abbrev=PP	breed=nelore	rs43702513
3	block_193_chr_3	rs42867941	rs43702513	64174324	64239387	65063	0.03627	Production	64239385	64239389	QTL_ID=66997	trait=Body_weight_gain	Abbrev=BWG	breed=holstein	rs42862819
3	block_320_chr_3	rs43350848	rs109726753	92054056	92123920	69864	0.04603	Reproduction	92058004	92058008	QTL_ID=121566	trait=Luteal_activity	Abbrev=LUTACT	breed=holstein	rs137353877
3	block_320_chr_3	rs43350848	rs109726753	92054056	92123920	69864	0.04603	Reproduction	92060611	92060615	QTL_ID=121458	trait=Luteal_activity	Abbrev=LUTACT	breed=Angus	rs439093722
3	block_320_chr_3	rs43350848	rs109726753	92054056	92123920	69864	0.04603	Reproduction	92064952	92064956	QTL_ID=121575	trait=Luteal_activity	Abbrev=LUTACT	breed=holstein	rs41587368
3	block_320_chr_3	rs43350848	rs109726753	92054056	92123920	69864	0.04603	Reproduction	92066101	92066105	QTL_ID=121506	trait=Luteal_activity	Abbrev=LUTACT	breed=holstein	rs465686780
3	block_320_chr_3	rs43350848	rs109726753	92054056	92123920	69864	0.04603	Reproduction	92066715	92066719	QTL_ID=121007	trait=Luteal_activity	Abbrev=LUTACT	breed=holstein	rs136396728
3	block_320_chr_3	rs43350848	rs109726753	92054056	92123920	69864	0.04603	Reproduction	92066883	92066887	QTL_ID=120927	trait=Luteal_activity	Abbrev=LUTACT	breed=holstein	rs109530280
3	block_320_chr_3	rs43350848	rs109726753	92054056	92123920	69864	0.04603	Reproduction	92070056	92070060	QTL_ID=120972	trait=Luteal_activity	Abbrev=LUTACT	breed=holstein	rs43367040
3	block_320_chr_3	rs43350848	rs109726753	92054056	92123920	69864	0.04603	Reproduction	92070696	92070700	QTL_ID=121155	trait=Luteal_activity	Abbrev=LUTACT	breed=holstein	rs136798183
3	block_320_chr_3	rs43350848	rs109726753	92054056	92123920	69864	0.04603	Reproduction	92070701	92070705	QTL_ID=120903	trait=Luteal_activity	Abbrev=LUTACT	breed=holstein	rs134311964
3	block_320_chr_3	rs43350848	rs109726753	92054056	92123920	69864	0.04603	Reproduction	92082465	92082469	QTL_ID=120932	trait=Luteal_activity	Abbrev=LUTACT	breed=holstein	rs133200096
3	block_320_chr_3	rs43350848	rs109726753	92054056	92123920	69864	0.04603	Reproduction	92082795	92082799	QTL_ID=121201	trait=Luteal_activity	Abbrev=LUTACT	breed=holstein	rs480285530
3	block_320_chr_3	rs43350848	rs109726753	92054056	92123920	69864	0.04603	Reproduction	92085385	92085389	QTL_ID=121535	trait=Luteal_activity	Abbrev=LUTACT	breed=holstein	rs110228865
3	block_320_chr_3	rs43350848	rs109726753	92054056	92123920	69864	0.04603	Reproduction	92092067	92092071	QTL_ID=106921	trait=Daughter_pregnancy_rate	Abbrev=DPR	breed=holstein	rs109977837
3	block_320_chr_3	rs43350848	rs109726753	92054056	92123920	69864	0.04603	Reproduction	92102204	92102208	QTL_ID=121021	trait=Luteal_activity	Abbrev=LUTACT	breed=holstein	rs109977837
3	block_420_chr_3	rs110656886	rs42460993	113880893	113901073	20180	0.05242	Milk	113884234	113884238	QTL_ID=64006	trait=Milk_riboflavin_content	Abbrev=RIBO	breed=holstein	rs41649818,rs29011657
3	block_420_chr_3	rs110656886	rs42460993	113880893	113901073	20180	0.05242	Milk	113889410	113889414	QTL_ID=64007	trait=Milk_riboflavin_content	Abbrev=RIBO	breed=holstein	rs134458891,rs136801407
4	block_87_chr_4	rs29013539	rs41653992	26796377	26854185	57808	0.05561	Milk	26854183	26854187	QTL_ID=26726	trait=Milk_protein_percentage	Abbrev=PP	breed=holstein	rs110562779
4	block_122_chr_4	rs42169452	rs110203552	36966333	36990307	23974	0.02844	Exterior	36966331	36966335	QTL_ID=28163	trait=Udder_cleft	Abbrev=UC	breed=holstein	MNB-42
4	block_219_chr_4	rs43402375	rs43400956	61247646	61322228	74582	0.04336	Production	61322226	61322230	QTL_ID=24712	trait=Body_weight_(weaning)	Abbrev=WWT	breed=holstein	rs434336014
4	block_219_chr_4	rs43402375	rs43400956	61247646	61322228	74582	0.04336	Production	61322226	61322230	QTL_ID=24781	trait=Body_weight_(yearling)	Abbrev=W365	breed=German_Black_Pied	rs29012226
4	block_239_chr_4	rs110877866	rs43401470	66103436	66153156	49720	0.03114	Production	66103434	66103438	QTL_ID=67025	trait=Body_weight_gain	Abbrev=BWG	breed=hereford,limousin,Angus	rs109038932
5	block_48_chr_5	rs109443432	rs41576637	13197225	13236807	39582	0.03843	Milk	13236805	13236809	QTL_ID=125442	trait=Lactation_persistency	Abbrev=LACTPER	breed=gelbvieh	rs384679906
5	block_92_chr_5	rs29002549	rs29003499	30184122	30204315	20193	0.03167	Production	30184901	30184905	QTL_ID=122667	trait=Length_of_productive_life	Abbrev=PL	breed=holstein	rs136538217
5	block_92_chr_5	rs29002549	rs29003499	30184122	30204315	20193	0.03167	Production	30184901	30184905	QTL_ID=123355	trait=Length_of_productive_life	Abbrev=PL	breed=holstein	rs136216231
5	block_92_chr_5	rs29002549	rs29003499	30184122	30204315	20193	0.03167	Production	30189136	30189140	QTL_ID=122668	trait=Length_of_productive_life	Abbrev=PL	breed=holstein	rs110351880
5	block_92_chr_5	rs29002549	rs29003499	30184122	30204315	20193	0.03167	Production	30189136	30189140	QTL_ID=123356	trait=Length_of_productive_life	Abbrev=PL	breed=holstein	rs137424743
5	block_92_chr_5	rs29002549	rs29003499	30184122	30204315	20193	0.03167	Production	30196333	30196337	QTL_ID=122669	trait=Length_of_productive_life	Abbrev=PL	breed=holstein	rs135842805
5	block_92_chr_5	rs29002549	rs29003499	30184122	30204315	20193	0.03167	Production	30196333	30196337	QTL_ID=123357	trait=Length_of_productive_life	Abbrev=PL	breed=holstein	rs109203511
5	block_92_chr_5	rs29002549	rs29003499	30184122	30204315	20193	0.03167	Production	30202419	30202423	QTL_ID=122670	trait=Length_of_productive_life	Abbrev=PL	breed=holstein	rs133689198
5	block_92_chr_5	rs29002549	rs29003499	30184122	30204315	20193	0.03167	Production	30202419	30202423	QTL_ID=123358	trait=Length_of_productive_life	Abbrev=PL	breed=holstein	rs135373021
5	block_92_chr_5	rs29002549	rs29003499	30184122	30204315	20193	0.03167	Reproduction	30184120	30184124	QTL_ID=30147	trait=Interval_to_first_estrus_after_calving	Abbrev=CALEST	breed=holstein	rs109774980
5	block_92_chr_5	rs29002549	rs29003499	30184122	30204315	20193	0.03167	Reproduction	30184120	30184124	QTL_ID=30382	trait=Interval_to_first_estrus_after_calving	Abbrev=CALEST	breed=holstein	rs109903159
5	block_92_chr_5	rs29002549	rs29003499	30184122	30204315	20193	0.03167	Reproduction	30204313	30204317	QTL_ID=30171	trait=Interval_to_first_estrus_after_calving	Abbrev=CALEST	breed=holstein	rs110049706
5	block_92_chr_5	rs29002549	rs29003499	30184122	30204315	20193	0.03167	Reproduction	30204313	30204317	QTL_ID=30409	trait=Interval_to_first_estrus_after_calving	Abbrev=CALEST	breed=holstein	rs110029418
5	block_108_chr_5	rs41590051	rs41629283	37677811	37749836	72025	0.0286	Milk	37687371	37687375	QTL_ID=111318	trait=Milk_kappa-casein_percentage	Abbrev=MKCASP	breed=holstein	rs41595610
5	block_108_chr_5	rs41590051	rs41629283	37677811	37749836	72025	0.0286	Production	37749834	37749838	QTL_ID=67141	trait=Body_weight_(weaning)	Abbrev=WWT	breed=holstein	rs449801183
5	block_108_chr_5	rs41590051	rs41629283	37677811	37749836	72025	0.0286	Production	37749834	37749838	QTL_ID=67142	trait=Body_weight_gain	Abbrev=BWG	breed=Angus	rs133198065
5	block_108_chr_5	rs41590051	rs41629283	37677811	37749836	72025	0.0286	Reproduction	37733043	37733047	QTL_ID=212550	trait=Inseminations_per_conception	Abbrev=CONCEPT	breed=holstein	rs109623827
5	block_180_chr_5	rs109739902	rs109980961	73581692	73619330	37638	0.028	Reproduction	73619328	73619332	QTL_ID=194134	trait=Inseminations_per_conception	Abbrev=CONCEPT	breed=ayrshire,danish_red,Swedish_Red-and-White	rs41589401
5	block_302_chr_5	rs110844659	rs109886869	116015434	116134185	118751	0.03339	Milk	116134183	116134187	QTL_ID=32345	trait=Milk_delta-9-desaturase_content	Abbrev=D9D	breed=charolais,gelbvieh,hereford,limousin,pinzgauer,red_angus,red_poll,simmental,Angus	rs209727589
5	block_302_chr_5	rs110844659	rs109886869	116015434	116134185	118751	0.03339	Reproduction	116106906	116106910	QTL_ID=177003	trait=Conception_rate	Abbrev=CONCRATE	breed=holstein	rs208645989
5	block_303_chr_5	rs109513912	rs110659119	116391317	116448403	57086	0.02876	Exterior	116407273	116407277	QTL_ID=154119	trait=Stature	Abbrev=STA	breed=charolais,gelbvieh,hereford,limousin,pinzgauer,red_angus,red_poll,simmental,Angus	rs207550149
5	block_303_chr_5	rs109513912	rs110659119	116391317	116448403	57086	0.02876	Exterior	116407273	116407277	QTL_ID=154369	trait=Stature	Abbrev=STA	breed=holstein	rs109454650
5	block_303_chr_5	rs109513912	rs110659119	116391317	116448403	57086	0.02876	Milk	116391315	116391319	QTL_ID=163980	trait=Milk_fat_yield	Abbrev=FY	breed=blonde_d'aquitaine	rs208645989
5	block_303_chr_5	rs109513912	rs110659119	116391317	116448403	57086	0.02876	Milk	116409921	116409925	QTL_ID=156020	trait=Milk_tridecylic_acid_content	Abbrev=MFA-C13:0	breed=holstein	rs109248021
5	block_303_chr_5	rs109513912	rs110659119	116391317	116448403	57086	0.02876	Milk	116422293	116422297	QTL_ID=163975	trait=Milk_fat_yield	Abbrev=FY	breed=holstein	rs109248021
5	block_323_chr_5	rs43036671	rs41657101	119406813	119463301	56488	0.02941	Production	119441238	119441242	QTL_ID=67081	trait=Body_weight_(yearling)	Abbrev=W365	breed=holstein	rs108985661
5	block_323_chr_5	rs43036671	rs41657101	119406813	119463301	56488	0.02941	Reproduction	119424099	119424103	QTL_ID=181216	trait=Conception_rate	Abbrev=CONCRATE	breed=Angus	rs134436026
6	block_4_chr_6	rs110710192	rs41663389	641260	670124	28864	0.04814	Exterior	641258	641262	QTL_ID=41728	trait=Feet_and_leg_conformation	Abbrev=FTLEG	breed=Angus	rs135314769
6	block_4_chr_6	rs110710192	rs41663389	641260	670124	28864	0.04814	Exterior	641258	641262	QTL_ID=41731	trait=Teat_placement_-_front	Abbrev=FTPL	breed=gelbvieh	rs135411900
6	block_4_chr_6	rs110710192	rs41663389	641260	670124	28864	0.04814	Exterior	641258	641262	QTL_ID=41732	trait=Udder_attachment	Abbrev=UA	breed=gelbvieh	rs135640023
6	block_4_chr_6	rs110710192	rs41663389	641260	670124	28864	0.04814	Exterior	641258	641262	QTL_ID=41737	trait=Rear_leg_placement_-_rear_view	Abbrev=RLEGR	breed=gelbvieh	rs136137849
6	block_4_chr_6	rs110710192	rs41663389	641260	670124	28864	0.04814	Exterior	641258	641262	QTL_ID=41738	trait=Teat_placement_-_rear	Abbrev=RTPL	breed=charolais,gelbvieh,hereford,limousin,pinzgauer,red_angus,red_poll,simmental,Angus	rs136190942
6	block_4_chr_6	rs110710192	rs41663389	641260	670124	28864	0.04814	Exterior	641258	641262	QTL_ID=41739	trait=Udder_height	Abbrev=UHT	breed=charolais,gelbvieh,hereford,limousin,pinzgauer,red_angus,red_poll,simmental,Angus	rs136257809
6	block_4_chr_6	rs110710192	rs41663389	641260	670124	28864	0.04814	Exterior	641258	641262	QTL_ID=41741	trait=Stature	Abbrev=STA	breed=charolais,gelbvieh,hereford,limousin,pinzgauer,red_angus,red_poll,simmental,Angus	rs136413048
6	block_4_chr_6	rs110710192	rs41663389	641260	670124	28864	0.04814	Exterior	641258	641262	QTL_ID=41742	trait=Strength	Abbrev=STR	breed=charolais,gelbvieh,hereford,limousin,pinzgauer,red_angus,red_poll,simmental,Angus	rs136416413
6	block_4_chr_6	rs110710192	rs41663389	641260	670124	28864	0.04814	Exterior	641258	641262	QTL_ID=41743	trait=Udder_depth	Abbrev=UDPTH	breed=Girolando	rs136523990
6	block_4_chr_6	rs110710192	rs41663389	641260	670124	28864	0.04814	Milk	641258	641262	QTL_ID=41729	trait=Milk_fat_percentage	Abbrev=FP	breed=holstein	rs135384060
6	block_4_chr_6	rs110710192	rs41663389	641260	670124	28864	0.04814	Milk	641258	641262	QTL_ID=41733	trait=Milk_fat_yield	Abbrev=FY	breed=charolais,gelbvieh,hereford,limousin,pinzgauer,red_angus,red_poll,simmental,Angus	rs135680544
6	block_4_chr_6	rs110710192	rs41663389	641260	670124	28864	0.04814	Milk	641258	641262	QTL_ID=41735	trait=Milk_protein_percentage	Abbrev=PP	breed=holstein	rs135922395
6	block_4_chr_6	rs110710192	rs41663389	641260	670124	28864	0.04814	Milk	641258	641262	QTL_ID=41736	trait=Milk_protein_yield	Abbrev=PY	breed=gelbvieh	rs135937048
6	block_4_chr_6	rs110710192	rs41663389	641260	670124	28864	0.04814	Production	641258	641262	QTL_ID=41726	trait=Body_depth	Abbrev=BD	breed=Hanwoo	rs135125616
6	block_4_chr_6	rs110710192	rs41663389	641260	670124	28864	0.04814	Production	641258	641262	QTL_ID=41730	trait=PTA_type	Abbrev=PTAT	breed=Angus	rs135400595
6	block_4_chr_6	rs110710192	rs41663389	641260	670124	28864	0.04814	Production	641258	641262	QTL_ID=41734	trait=Net_merit	Abbrev=NM	breed=charolais,gelbvieh,hereford,limousin,pinzgauer,red_angus,red_poll,simmental,Angus	rs135688682
6	block_4_chr_6	rs110710192	rs41663389	641260	670124	28864	0.04814	Production	641258	641262	QTL_ID=41740	trait=Rump_width	Abbrev=RUMWD	breed=charolais,gelbvieh,hereford,limousin,pinzgauer,red_angus,red_poll,simmental,Angus	rs136283820
6	block_4_chr_6	rs110710192	rs41663389	641260	670124	28864	0.04814	Reproduction	641258	641262	QTL_ID=41727	trait=Calving_ease_(maternal)	Abbrev=CALEASE	breed=brangus	rs135147861
6	block_30_chr_6	rs109435946	rs42928688	6399976	6482619	82643	0.03004	Production	6458235	6458239	QTL_ID=67718	trait=Body_weight_(birth)	Abbrev=BW	breed=charolais,gelbvieh,hereford,limousin,simmental,Angus	rs210772544
6	block_30_chr_6	rs109435946	rs42928688	6399976	6482619	82643	0.03004	Production	6482617	6482621	QTL_ID=67717	trait=Body_weight_(birth)	Abbrev=BW	breed=charolais,gelbvieh,hereford,limousin,simmental,Angus	rs378653582
6	block_34_chr_6	rs43444992	rs41650750	7438139	7474743	36604	0.03695	Reproduction	7448713	7448717	QTL_ID=181217	trait=Conception_rate	Abbrev=CONCRATE	breed=charolais,gelbvieh,hereford,limousin,simmental,Angus	rs137493341
6	block_34_chr_6	rs43444992	rs41650750	7438139	7474743	36604	0.03695	Reproduction	7448713	7448717	QTL_ID=181464	trait=Inseminations_per_conception	Abbrev=CONCEPT	breed=charolais,gelbvieh,hereford,limousin,simmental,Angus	rs137562559
6	block_104_chr_6	rs42547296	rs41664505	23503327	23564107	60780	0.03172	Health	23533173	23533177	QTL_ID=25244	trait=Clinical_mastitis	Abbrev=CM	breed=charolais,gelbvieh,hereford,limousin,simmental,Angus	rs137452521
6	block_104_chr_6	rs42547296	rs41664505	23503327	23564107	60780	0.03172	Production	23503325	23503329	QTL_ID=67693	trait=Body_weight_(yearling)	Abbrev=W365	breed=gelbvieh	rs137397993
6	block_104_chr_6	rs42547296	rs41664505	23503327	23564107	60780	0.03172	Production	23503325	23503329	QTL_ID=67694	trait=Body_weight_gain	Abbrev=BWG	breed=charolais,gelbvieh,hereford,limousin,simmental,Angus	rs137452521
6	block_118_chr_6	rs108944957	rs110131710	29357249	29406846	49597	0.02815	Production	29357247	29357251	QTL_ID=66312	trait=Body_weight_(birth)	Abbrev=BW	breed=charolais,gelbvieh,hereford,limousin,simmental,Angus	rs136289377
6	block_118_chr_6	rs108944957	rs110131710	29357249	29406846	49597	0.02815	Production	29357247	29357251	QTL_ID=67163	trait=Body_weight_gain	Abbrev=BWG	breed=charolais,gelbvieh,hereford,limousin,simmental,Angus	rs136376648
6	block_118_chr_6	rs108944957	rs110131710	29357249	29406846	49597	0.02815	Production	29406844	29406848	QTL_ID=67301	trait=Body_weight_(birth)	Abbrev=BW	breed=charolais,gelbvieh,hereford,limousin,simmental,Angus	rs136827092
6	block_118_chr_6	rs108944957	rs110131710	29357249	29406846	49597	0.02815	Production	29406844	29406848	QTL_ID=67302	trait=Body_weight_(yearling)	Abbrev=W365	breed=charolais,gelbvieh,hereford,limousin,simmental,Angus	rs136996212
6	block_118_chr_6	rs108944957	rs110131710	29357249	29406846	49597	0.02815	Production	29406844	29406848	QTL_ID=67303	trait=Body_weight_gain	Abbrev=BWG	breed=charolais,gelbvieh,hereford,limousin,simmental,Angus	rs136998304
6	block_145_chr_6	rs29026121	rs110517212	37778924	37933250	154326	0.03143	Milk	37822621	37822625	QTL_ID=137941	trait=Milk_protein_percentage	Abbrev=PP	breed=holstein	rs137167583
6	block_145_chr_6	rs29026121	rs110517212	37778924	37933250	154326	0.03143	Production	37778922	37778926	QTL_ID=24534	trait=Body_weight_(birth)	Abbrev=BW	breed=jersey	rs134204922
6	block_145_chr_6	rs29026121	rs110517212	37778924	37933250	154326	0.03143	Production	37796643	37796647	QTL_ID=188788	trait=Metabolic_body_weight	Abbrev=MBW	breed=charolais,gelbvieh,hereford,limousin,simmental,Angus	rs110622907
6	block_145_chr_6	rs29026121	rs110517212	37778924	37933250	154326	0.03143	Production	37796723	37796727	QTL_ID=189006	trait=Metabolic_body_weight	Abbrev=MBW	breed=charolais,gelbvieh,hereford,limousin,simmental,Angus	rs42605340
6	block_145_chr_6	rs29026121	rs110517212	37778924	37933250	154326	0.03143	Production	37796919	37796923	QTL_ID=131393	trait=Metabolic_body_weight	Abbrev=MBW	breed=charolais,gelbvieh,hereford,limousin,simmental,Angus	rs110840320
6	block_145_chr_6	rs29026121	rs110517212	37778924	37933250	154326	0.03143	Production	37796919	37796923	QTL_ID=183229	trait=Dry_matter_intake	Abbrev=DMI	breed=charolais,gelbvieh,hereford,limousin,simmental,Angus	rs110909656
6	block_145_chr_6	rs29026121	rs110517212	37778924	37933250	154326	0.03143	Production	37796919	37796923	QTL_ID=185377	trait=Average_daily_gain	Abbrev=ADG	breed=charolais,gelbvieh,hereford,limousin,simmental,Angus	rs136189530
6	block_145_chr_6	rs29026121	rs110517212	37778924	37933250	154326	0.03143	Production	37796919	37796923	QTL_ID=188594	trait=Metabolic_body_weight	Abbrev=MBW	breed=charolais,gelbvieh,hereford,limousin,simmental,Angus	rs461271920
6	block_145_chr_6	rs29026121	rs110517212	37778924	37933250	154326	0.03143	Production	37797231	37797235	QTL_ID=183249	trait=Dry_matter_intake	Abbrev=DMI	breed=charolais,gelbvieh,hereford,limousin,simmental,Angus	rs42605340
6	block_145_chr_6	rs29026121	rs110517212	37778924	37933250	154326	0.03143	Production	37797231	37797235	QTL_ID=185384	trait=Average_daily_gain	Abbrev=ADG	breed=charolais,gelbvieh,hereford,limousin,simmental,Angus	rs109382129
6	block_145_chr_6	rs29026121	rs110517212	37778924	37933250	154326	0.03143	Production	37797231	37797235	QTL_ID=188609	trait=Metabolic_body_weight	Abbrev=MBW	breed=charolais,gelbvieh,hereford,limousin,simmental,Angus	rs110467477
6	block_145_chr_6	rs29026121	rs110517212	37778924	37933250	154326	0.03143	Production	37801920	37801924	QTL_ID=185730	trait=Average_daily_gain	Abbrev=ADG	breed=charolais,gelbvieh,hereford,limousin,simmental,Angus	rs109397568
6	block_145_chr_6	rs29026121	rs110517212	37778924	37933250	154326	0.03143	Production	37801920	37801924	QTL_ID=189259	trait=Metabolic_body_weight	Abbrev=MBW	breed=charolais,gelbvieh,hereford,limousin,simmental,Angus	rs110909656
6	block_145_chr_6	rs29026121	rs110517212	37778924	37933250	154326	0.03143	Production	37803152	37803156	QTL_ID=184086	trait=Average_daily_gain	Abbrev=ADG	breed=charolais,gelbvieh,hereford,limousin,simmental,Angus	rs134171932
6	block_145_chr_6	rs29026121	rs110517212	37778924	37933250	154326	0.03143	Production	37803152	37803156	QTL_ID=186696	trait=Metabolic_body_weight	Abbrev=MBW	breed=charolais,gelbvieh,hereford,limousin,simmental,Angus	rs379908467
6	block_145_chr_6	rs29026121	rs110517212	37778924	37933250	154326	0.03143	Production	37803935	37803939	QTL_ID=184203	trait=Average_daily_gain	Abbrev=ADG	breed=charolais,gelbvieh,hereford,limousin,simmental,Angus	rs43458085
6	block_145_chr_6	rs29026121	rs110517212	37778924	37933250	154326	0.03143	Production	37803935	37803939	QTL_ID=186867	trait=Metabolic_body_weight	Abbrev=MBW	breed=charolais,gelbvieh,hereford,limousin,simmental,Angus	rs43461065
6	block_145_chr_6	rs29026121	rs110517212	37778924	37933250	154326	0.03143	Production	37803939	37803943	QTL_ID=183992	trait=Average_daily_gain	Abbrev=ADG	breed=charolais,gelbvieh,hereford,limousin,simmental,Angus	rs133258175
6	block_145_chr_6	rs29026121	rs110517212	37778924	37933250	154326	0.03143	Production	37803939	37803943	QTL_ID=186566	trait=Metabolic_body_weight	Abbrev=MBW	breed=charolais,gelbvieh,hereford,limousin,simmental,Angus	rs43458080
6	block_145_chr_6	rs29026121	rs110517212	37778924	37933250	154326	0.03143	Production	37804727	37804731	QTL_ID=184502	trait=Average_daily_gain	Abbrev=ADG	breed=charolais,gelbvieh,hereford,limousin,simmental,Angus	rs382436571
6	block_145_chr_6	rs29026121	rs110517212	37778924	37933250	154326	0.03143	Production	37804727	37804731	QTL_ID=187274	trait=Metabolic_body_weight	Abbrev=MBW	breed=charolais,gelbvieh,hereford,limousin,simmental,Angus	rs132834111
6	block_145_chr_6	rs29026121	rs110517212	37778924	37933250	154326	0.03143	Production	37805095	37805099	QTL_ID=184296	trait=Average_daily_gain	Abbrev=ADG	breed=charolais,gelbvieh,hereford,limousin,simmental,Angus	rs108951197
6	block_145_chr_6	rs29026121	rs110517212	37778924	37933250	154326	0.03143	Production	37805095	37805099	QTL_ID=186976	trait=Metabolic_body_weight	Abbrev=MBW	breed=charolais,gelbvieh,hereford,limousin,simmental,Angus	rs43461060
6	block_145_chr_6	rs29026121	rs110517212	37778924	37933250	154326	0.03143	Production	37806068	37806072	QTL_ID=185212	trait=Average_daily_gain	Abbrev=ADG	breed=charolais,gelbvieh,hereford,limousin,simmental,Angus	rs110840976
6	block_145_chr_6	rs29026121	rs110517212	37778924	37933250	154326	0.03143	Production	37806068	37806072	QTL_ID=188356	trait=Metabolic_body_weight	Abbrev=MBW	breed=charolais,gelbvieh,hereford,limousin,simmental,Angus	rs136330469
6	block_145_chr_6	rs29026121	rs110517212	37778924	37933250	154326	0.03143	Production	37809964	37809968	QTL_ID=184447	trait=Average_daily_gain	Abbrev=ADG	breed=charolais,gelbvieh,hereford,limousin,simmental,Angus	rs475559903
6	block_145_chr_6	rs29026121	rs110517212	37778924	37933250	154326	0.03143	Production	37809964	37809968	QTL_ID=187197	trait=Metabolic_body_weight	Abbrev=MBW	breed=charolais,gelbvieh,hereford,limousin,simmental,Angus	rs43461046
6	block_145_chr_6	rs29026121	rs110517212	37778924	37933250	154326	0.03143	Production	37810503	37810507	QTL_ID=131388	trait=Metabolic_body_weight	Abbrev=MBW	breed=jersey	rs109125092
6	block_145_chr_6	rs29026121	rs110517212	37778924	37933250	154326	0.03143	Production	37810503	37810507	QTL_ID=185163	trait=Average_daily_gain	Abbrev=ADG	breed=charolais,gelbvieh,hereford,limousin,simmental,Angus	rs110187124
6	block_145_chr_6	rs29026121	rs110517212	37778924	37933250	154326	0.03143	Production	37810503	37810507	QTL_ID=188279	trait=Metabolic_body_weight	Abbrev=MBW	breed=charolais,gelbvieh,hereford,limousin,simmental,Angus	rs135371470
6	block_145_chr_6	rs29026121	rs110517212	37778924	37933250	154326	0.03143	Production	37810777	37810781	QTL_ID=184651	trait=Average_daily_gain	Abbrev=ADG	breed=charolais,gelbvieh,hereford,limousin,simmental,Angus	rs43459952
6	block_145_chr_6	rs29026121	rs110517212	37778924	37933250	154326	0.03143	Production	37810777	37810781	QTL_ID=187505	trait=Metabolic_body_weight	Abbrev=MBW	breed=charolais,gelbvieh,hereford,limousin,simmental,Angus	rs135267115
6	block_145_chr_6	rs29026121	rs110517212	37778924	37933250	154326	0.03143	Production	37811031	37811035	QTL_ID=190131	trait=Metabolic_body_weight	Abbrev=MBW	breed=charolais,gelbvieh,hereford,limousin,simmental,Angus	rs135988356
6	block_145_chr_6	rs29026121	rs110517212	37778924	37933250	154326	0.03143	Production	37811539	37811543	QTL_ID=184072	trait=Average_daily_gain	Abbrev=ADG	breed=charolais,gelbvieh,hereford,limousin,simmental,Angus	rs109579682
6	block_145_chr_6	rs29026121	rs110517212	37778924	37933250	154326	0.03143	Production	37811539	37811543	QTL_ID=186674	trait=Metabolic_body_weight	Abbrev=MBW	breed=charolais,gelbvieh,hereford,limousin,simmental,Angus	rs42728504
6	block_145_chr_6	rs29026121	rs110517212	37778924	37933250	154326	0.03143	Production	37811598	37811602	QTL_ID=131394	trait=Metabolic_body_weight	Abbrev=MBW	breed=charolais,holstein	rs133890939
6	block_145_chr_6	rs29026121	rs110517212	37778924	37933250	154326	0.03143	Production	37811598	37811602	QTL_ID=183886	trait=Average_daily_gain	Abbrev=ADG	breed=charolais,gelbvieh,hereford,limousin,simmental,Angus	rs109579682
6	block_145_chr_6	rs29026121	rs110517212	37778924	37933250	154326	0.03143	Production	37811598	37811602	QTL_ID=186399	trait=Metabolic_body_weight	Abbrev=MBW	breed=charolais,gelbvieh,hereford,limousin,simmental,Angus	rs109163366
6	block_145_chr_6	rs29026121	rs110517212	37778924	37933250	154326	0.03143	Production	37811806	37811810	QTL_ID=184557	trait=Average_daily_gain	Abbrev=ADG	breed=charolais,gelbvieh,hereford,limousin,simmental,Angus	rs132731940
6	block_145_chr_6	rs29026121	rs110517212	37778924	37933250	154326	0.03143	Production	37811806	37811810	QTL_ID=187357	trait=Metabolic_body_weight	Abbrev=MBW	breed=charolais,gelbvieh,hereford,limousin,simmental,Angus	rs378088121
6	block_145_chr_6	rs29026121	rs110517212	37778924	37933250	154326	0.03143	Production	37811945	37811949	QTL_ID=185341	trait=Average_daily_gain	Abbrev=ADG	breed=charolais,gelbvieh,hereford,limousin,simmental,Angus	rs133669403
6	block_145_chr_6	rs29026121	rs110517212	37778924	37933250	154326	0.03143	Production	37811945	37811949	QTL_ID=188540	trait=Metabolic_body_weight	Abbrev=MBW	breed=charolais,gelbvieh,hereford,limousin,simmental,Angus	rs378576513
6	block_145_chr_6	rs29026121	rs110517212	37778924	37933250	154326	0.03143	Production	37812325	37812329	QTL_ID=185430	trait=Average_daily_gain	Abbrev=ADG	breed=charolais,gelbvieh,hereford,limousin,simmental,Angus	rs109579682
6	block_145_chr_6	rs29026121	rs110517212	37778924	37933250	154326	0.03143	Production	37812325	37812329	QTL_ID=188675	trait=Metabolic_body_weight	Abbrev=MBW	breed=charolais,gelbvieh,hereford,limousin,simmental,Angus	rs381225434
6	block_145_chr_6	rs29026121	rs110517212	37778924	37933250	154326	0.03143	Production	37812519	37812523	QTL_ID=131389	trait=Metabolic_body_weight	Abbrev=MBW	breed=charolais,chianina,gelbvieh,hereford,holstein,limousin,piedmontese,red_angus,simmental,Angus,Maine-Anjou	rs135146886
6	block_145_chr_6	rs29026121	rs110517212	37778924	37933250	154326	0.03143	Production	37812519	37812523	QTL_ID=184916	trait=Average_daily_gain	Abbrev=ADG	breed=charolais,chianina,gelbvieh,hereford,holstein,limousin,piedmontese,red_angus,simmental,Angus,Maine-Anjou	rs137764029
6	block_145_chr_6	rs29026121	rs110517212	37778924	37933250	154326	0.03143	Production	37812519	37812523	QTL_ID=187896	trait=Metabolic_body_weight	Abbrev=MBW	breed=charolais,gelbvieh,hereford,limousin,simmental,Angus	rs29025709
6	block_145_chr_6	rs29026121	rs110517212	37778924	37933250	154326	0.03143	Production	37813024	37813028	QTL_ID=184604	trait=Average_daily_gain	Abbrev=ADG	breed=charolais,gelbvieh,hereford,limousin,pinzgauer,red_angus,red_poll,simmental,Angus	rs132852324
6	block_145_chr_6	rs29026121	rs110517212	37778924	37933250	154326	0.03143	Production	37813024	37813028	QTL_ID=187433	trait=Metabolic_body_weight	Abbrev=MBW	breed=charolais,gelbvieh,hereford,limousin,simmental,Angus	rs378359528
6	block_145_chr_6	rs29026121	rs110517212	37778924	37933250	154326	0.03143	Production	37813292	37813296	QTL_ID=184230	trait=Average_daily_gain	Abbrev=ADG	breed=charolais,gelbvieh,hereford,limousin,simmental,Angus	rs133651962
6	block_145_chr_6	rs29026121	rs110517212	37778924	37933250	154326	0.03143	Production	37813292	37813296	QTL_ID=186894	trait=Metabolic_body_weight	Abbrev=MBW	breed=charolais,gelbvieh,hereford,limousin,simmental,Angus	rs384279245
6	block_145_chr_6	rs29026121	rs110517212	37778924	37933250	154326	0.03143	Production	37813422	37813426	QTL_ID=185074	trait=Average_daily_gain	Abbrev=ADG	breed=charolais,gelbvieh,hereford,limousin,simmental,Angus	rs136209025
6	block_145_chr_6	rs29026121	rs110517212	37778924	37933250	154326	0.03143	Production	37813422	37813426	QTL_ID=188156	trait=Metabolic_body_weight	Abbrev=MBW	breed=charolais,gelbvieh,hereford,limousin,simmental,Angus	rs379921069
6	block_145_chr_6	rs29026121	rs110517212	37778924	37933250	154326	0.03143	Production	37813570	37813574	QTL_ID=131390	trait=Metabolic_body_weight	Abbrev=MBW	breed=charolais,chianina,gelbvieh,hereford,holstein,limousin,piedmontese,red_angus,simmental,Angus,Maine-Anjou	rs135146886
6	block_145_chr_6	rs29026121	rs110517212	37778924	37933250	154326	0.03143	Production	37813570	37813574	QTL_ID=183967	trait=Average_daily_gain	Abbrev=ADG	breed=charolais,gelbvieh,hereford,limousin,simmental,Angus	rs109579682
6	block_145_chr_6	rs29026121	rs110517212	37778924	37933250	154326	0.03143	Production	37813570	37813574	QTL_ID=186535	trait=Metabolic_body_weight	Abbrev=MBW	breed=charolais,gelbvieh,hereford,limousin,simmental,Angus	rs137814830
6	block_145_chr_6	rs29026121	rs110517212	37778924	37933250	154326	0.03143	Production	37813636	37813640	QTL_ID=185360	trait=Average_daily_gain	Abbrev=ADG	breed=charolais,gelbvieh,hereford,limousin,simmental,Angus	rs109164431
6	block_145_chr_6	rs29026121	rs110517212	37778924	37933250	154326	0.03143	Production	37813636	37813640	QTL_ID=188569	trait=Metabolic_body_weight	Abbrev=MBW	breed=charolais,gelbvieh,hereford,limousin,simmental,Angus	rs379069728
6	block_145_chr_6	rs29026121	rs110517212	37778924	37933250	154326	0.03143	Production	37813726	37813730	QTL_ID=183952	trait=Average_daily_gain	Abbrev=ADG	breed=charolais,gelbvieh,hereford,limousin,simmental,Angus	rs109579682
6	block_145_chr_6	rs29026121	rs110517212	37778924	37933250	154326	0.03143	Production	37813726	37813730	QTL_ID=186504	trait=Metabolic_body_weight	Abbrev=MBW	breed=charolais,gelbvieh,hereford,limousin,simmental,Angus	rs110827819
6	block_145_chr_6	rs29026121	rs110517212	37778924	37933250	154326	0.03143	Production	37813962	37813966	QTL_ID=185006	trait=Average_daily_gain	Abbrev=ADG	breed=charolais,gelbvieh,hereford,limousin,simmental,Angus	rs211174722
6	block_145_chr_6	rs29026121	rs110517212	37778924	37933250	154326	0.03143	Production	37813962	37813966	QTL_ID=188047	trait=Metabolic_body_weight	Abbrev=MBW	breed=charolais,gelbvieh,hereford,limousin,simmental,Angus	rs379001508
6	block_145_chr_6	rs29026121	rs110517212	37778924	37933250	154326	0.03143	Production	37814263	37814267	QTL_ID=184894	trait=Average_daily_gain	Abbrev=ADG	breed=charolais,chianina,gelbvieh,hereford,holstein,limousin,piedmontese,red_angus,simmental,Angus,Maine-Anjou	rs209835995
6	block_145_chr_6	rs29026121	rs110517212	37778924	37933250	154326	0.03143	Production	37814263	37814267	QTL_ID=187867	trait=Metabolic_body_weight	Abbrev=MBW	breed=charolais,gelbvieh,hereford,limousin,simmental,Angus	rs211092862
6	block_145_chr_6	rs29026121	rs110517212	37778924	37933250	154326	0.03143	Production	37814637	37814641	QTL_ID=184862	trait=Average_daily_gain	Abbrev=ADG	breed=norwegian_red	rs135489630
6	block_145_chr_6	rs29026121	rs110517212	37778924	37933250	154326	0.03143	Production	37814637	37814641	QTL_ID=187821	trait=Metabolic_body_weight	Abbrev=MBW	breed=charolais,gelbvieh,hereford,limousin,simmental,Angus	rs137815186
6	block_145_chr_6	rs29026121	rs110517212	37778924	37933250	154326	0.03143	Production	37814926	37814930	QTL_ID=131391	trait=Metabolic_body_weight	Abbrev=MBW	breed=norwegian_red	rs133890939
6	block_145_chr_6	rs29026121	rs110517212	37778924	37933250	154326	0.03143	Production	37814926	37814930	QTL_ID=184518	trait=Average_daily_gain	Abbrev=ADG	breed=charolais,gelbvieh,hereford,limousin,simmental,Angus	rs110990855
6	block_145_chr_6	rs29026121	rs110517212	37778924	37933250	154326	0.03143	Production	37814926	37814930	QTL_ID=187303	trait=Metabolic_body_weight	Abbrev=MBW	breed=charolais,gelbvieh,hereford,limousin,simmental,Angus	rs377846039
6	block_145_chr_6	rs29026121	rs110517212	37778924	37933250	154326	0.03143	Production	37815232	37815236	QTL_ID=190132	trait=Metabolic_body_weight	Abbrev=MBW	breed=charolais,gelbvieh,hereford,limousin,pinzgauer,red_angus,red_poll,simmental,Angus	rs137387807
6	block_145_chr_6	rs29026121	rs110517212	37778924	37933250	154326	0.03143	Production	37815455	37815459	QTL_ID=184749	trait=Average_daily_gain	Abbrev=ADG	breed=charolais,gelbvieh,hereford,limousin,pinzgauer,red_angus,red_poll,simmental,Angus	rs133767492
6	block_145_chr_6	rs29026121	rs110517212	37778924	37933250	154326	0.03143	Production	37815455	37815459	QTL_ID=187649	trait=Metabolic_body_weight	Abbrev=MBW	breed=charolais,gelbvieh,hereford,limousin,simmental,Angus	rs381489766
6	block_145_chr_6	rs29026121	rs110517212	37778924	37933250	154326	0.03143	Production	37815487	37815491	QTL_ID=185180	trait=Average_daily_gain	Abbrev=ADG	breed=charolais,gelbvieh,hereford,limousin,simmental,Angus	rs133669403
6	block_145_chr_6	rs29026121	rs110517212	37778924	37933250	154326	0.03143	Production	37815487	37815491	QTL_ID=188308	trait=Metabolic_body_weight	Abbrev=MBW	breed=norwegian_red	rs381935597
6	block_145_chr_6	rs29026121	rs110517212	37778924	37933250	154326	0.03143	Production	37815613	37815617	QTL_ID=131392	trait=Metabolic_body_weight	Abbrev=MBW	breed=norwegian_red	rs133890939
6	block_145_chr_6	rs29026121	rs110517212	37778924	37933250	154326	0.03143	Production	37815613	37815617	QTL_ID=184364	trait=Average_daily_gain	Abbrev=ADG	breed=charolais,gelbvieh,hereford,limousin,simmental,Angus	rs385019558
6	block_145_chr_6	rs29026121	rs110517212	37778924	37933250	154326	0.03143	Production	37815613	37815617	QTL_ID=187064	trait=Metabolic_body_weight	Abbrev=MBW	breed=charolais,gelbvieh,hereford,limousin,simmental,Angus	rs384476493
6	block_145_chr_6	rs29026121	rs110517212	37778924	37933250	154326	0.03143	Production	37815804	37815808	QTL_ID=185450	trait=Average_daily_gain	Abbrev=ADG	breed=charolais,gelbvieh,hereford,limousin,simmental,Angus	rs137537655
6	block_145_chr_6	rs29026121	rs110517212	37778924	37933250	154326	0.03143	Production	37815804	37815808	QTL_ID=188713	trait=Metabolic_body_weight	Abbrev=MBW	breed=charolais,gelbvieh,hereford,limousin,simmental,Angus	rs383140066
6	block_145_chr_6	rs29026121	rs110517212	37778924	37933250	154326	0.03143	Production	37815870	37815874	QTL_ID=184928	trait=Average_daily_gain	Abbrev=ADG	breed=charolais,gelbvieh,hereford,limousin,simmental,Angus	rs133368290
6	block_145_chr_6	rs29026121	rs110517212	37778924	37933250	154326	0.03143	Production	37815870	37815874	QTL_ID=187913	trait=Metabolic_body_weight	Abbrev=MBW	breed=charolais,gelbvieh,hereford,limousin,simmental,Angus	rs135916381
6	block_145_chr_6	rs29026121	rs110517212	37778924	37933250	154326	0.03143	Production	37815916	37815920	QTL_ID=184980	trait=Average_daily_gain	Abbrev=ADG	breed=charolais,gelbvieh,hereford,limousin,simmental,Angus	rs135432595
6	block_145_chr_6	rs29026121	rs110517212	37778924	37933250	154326	0.03143	Production	37815916	37815920	QTL_ID=188005	trait=Metabolic_body_weight	Abbrev=MBW	breed=charolais,gelbvieh,hereford,limousin,simmental,Angus	rs29025709
6	block_145_chr_6	rs29026121	rs110517212	37778924	37933250	154326	0.03143	Production	37816009	37816013	QTL_ID=185204	trait=Average_daily_gain	Abbrev=ADG	breed=charolais,gelbvieh,hereford,limousin,simmental,Angus	rs133669403
6	block_145_chr_6	rs29026121	rs110517212	37778924	37933250	154326	0.03143	Production	37816009	37816013	QTL_ID=188342	trait=Metabolic_body_weight	Abbrev=MBW	breed=charolais,gelbvieh,hereford,limousin,simmental,Angus	rs382418875
6	block_145_chr_6	rs29026121	rs110517212	37778924	37933250	154326	0.03143	Production	37816190	37816194	QTL_ID=185296	trait=Average_daily_gain	Abbrev=ADG	breed=charolais,gelbvieh,hereford,limousin,simmental,Angus	rs109579682
6	block_145_chr_6	rs29026121	rs110517212	37778924	37933250	154326	0.03143	Production	37816190	37816194	QTL_ID=188476	trait=Metabolic_body_weight	Abbrev=MBW	breed=charolais,gelbvieh,hereford,limousin,simmental,Angus	rs384290075
6	block_145_chr_6	rs29026121	rs110517212	37778924	37933250	154326	0.03143	Production	37816229	37816233	QTL_ID=131395	trait=Metabolic_body_weight	Abbrev=MBW	breed=charolais,gelbvieh,hereford,limousin,pinzgauer,red_angus,red_poll,simmental,Angus	rs108961122
6	block_145_chr_6	rs29026121	rs110517212	37778924	37933250	154326	0.03143	Production	37816229	37816233	QTL_ID=185184	trait=Average_daily_gain	Abbrev=ADG	breed=charolais,gelbvieh,hereford,limousin,simmental,Angus	rs133669403
6	block_145_chr_6	rs29026121	rs110517212	37778924	37933250	154326	0.03143	Production	37816229	37816233	QTL_ID=188314	trait=Metabolic_body_weight	Abbrev=MBW	breed=charolais,gelbvieh,hereford,limousin,simmental,Angus	rs382198410
6	block_145_chr_6	rs29026121	rs110517212	37778924	37933250	154326	0.03143	Production	37816298	37816302	QTL_ID=185114	trait=Average_daily_gain	Abbrev=ADG	breed=charolais,gelbvieh,hereford,limousin,simmental,Angus	rs210509806
6	block_145_chr_6	rs29026121	rs110517212	37778924	37933250	154326	0.03143	Production	37816298	37816302	QTL_ID=188213	trait=Metabolic_body_weight	Abbrev=MBW	breed=holstein	rs381425955
6	block_145_chr_6	rs29026121	rs110517212	37778924	37933250	154326	0.03143	Production	37816495	37816499	QTL_ID=185829	trait=Average_daily_gain	Abbrev=ADG	breed=charolais,gelbvieh,hereford,limousin,simmental,Angus	rs136300583
6	block_145_chr_6	rs29026121	rs110517212	37778924	37933250	154326	0.03143	Production	37816495	37816499	QTL_ID=189427	trait=Metabolic_body_weight	Abbrev=MBW	breed=charolais,gelbvieh,hereford,limousin,simmental,Angus	rs380847166
6	block_145_chr_6	rs29026121	rs110517212	37778924	37933250	154326	0.03143	Production	37816533	37816537	QTL_ID=185972	trait=Average_daily_gain	Abbrev=ADG	breed=charolais,gelbvieh,hereford,limousin,simmental,Angus	rs109579682
6	block_145_chr_6	rs29026121	rs110517212	37778924	37933250	154326	0.03143	Production	37816533	37816537	QTL_ID=189648	trait=Metabolic_body_weight	Abbrev=MBW	breed=charolais,gelbvieh,hereford,limousin,simmental,Angus	rs381539612
6	block_145_chr_6	rs29026121	rs110517212	37778924	37933250	154326	0.03143	Production	37816585	37816589	QTL_ID=186045	trait=Average_daily_gain	Abbrev=ADG	breed=charolais,gelbvieh,hereford,limousin,simmental,Angus	rs29025436
6	block_145_chr_6	rs29026121	rs110517212	37778924	37933250	154326	0.03143	Production	37816585	37816589	QTL_ID=189795	trait=Metabolic_body_weight	Abbrev=MBW	breed=charolais,gelbvieh,hereford,limousin,simmental,Angus	rs382253070
6	block_145_chr_6	rs29026121	rs110517212	37778924	37933250	154326	0.03143	Production	37816752	37816756	QTL_ID=183504	trait=Dry_matter_intake	Abbrev=DMI	breed=charolais,gelbvieh,hereford,limousin,simmental,Angus	rs29025709
6	block_145_chr_6	rs29026121	rs110517212	37778924	37933250	154326	0.03143	Production	37816752	37816756	QTL_ID=185010	trait=Average_daily_gain	Abbrev=ADG	breed=charolais,gelbvieh,hereford,limousin,simmental,Angus	rs110869563
6	block_145_chr_6	rs29026121	rs110517212	37778924	37933250	154326	0.03143	Production	37816752	37816756	QTL_ID=188053	trait=Metabolic_body_weight	Abbrev=MBW	breed=charolais,gelbvieh,hereford,limousin,simmental,Angus	rs379530844
6	block_145_chr_6	rs29026121	rs110517212	37778924	37933250	154326	0.03143	Production	37816971	37816975	QTL_ID=185036	trait=Average_daily_gain	Abbrev=ADG	breed=charolais,gelbvieh,hereford,limousin,simmental,Angus	rs134734516
6	block_145_chr_6	rs29026121	rs110517212	37778924	37933250	154326	0.03143	Production	37816971	37816975	QTL_ID=188092	trait=Metabolic_body_weight	Abbrev=MBW	breed=charolais,gelbvieh,hereford,limousin,simmental,Angus	rs379762586
6	block_145_chr_6	rs29026121	rs110517212	37778924	37933250	154326	0.03143	Production	37816992	37816996	QTL_ID=185233	trait=Average_daily_gain	Abbrev=ADG	breed=charolais,gelbvieh,hereford,limousin,simmental,Angus	rs133669403
6	block_145_chr_6	rs29026121	rs110517212	37778924	37933250	154326	0.03143	Production	37816992	37816996	QTL_ID=188392	trait=Metabolic_body_weight	Abbrev=MBW	breed=charolais,gelbvieh,hereford,limousin,simmental,Angus	rs383140066
6	block_145_chr_6	rs29026121	rs110517212	37778924	37933250	154326	0.03143	Production	37817076	37817080	QTL_ID=183134	trait=Dry_matter_intake	Abbrev=DMI	breed=charolais,gelbvieh,hereford,limousin,simmental,Angus	rs383082236
6	block_145_chr_6	rs29026121	rs110517212	37778924	37933250	154326	0.03143	Production	37817076	37817080	QTL_ID=185076	trait=Average_daily_gain	Abbrev=ADG	breed=charolais,gelbvieh,hereford,limousin,simmental,Angus	rs381119193
6	block_145_chr_6	rs29026121	rs110517212	37778924	37933250	154326	0.03143	Production	37817076	37817080	QTL_ID=188158	trait=Metabolic_body_weight	Abbrev=MBW	breed=charolais,gelbvieh,hereford,limousin,simmental,Angus	rs381225434
6	block_145_chr_6	rs29026121	rs110517212	37778924	37933250	154326	0.03143	Production	37817098	37817102	QTL_ID=184956	trait=Average_daily_gain	Abbrev=ADG	breed=charolais,gelbvieh,hereford,limousin,simmental,Angus	rs134106354
6	block_145_chr_6	rs29026121	rs110517212	37778924	37933250	154326	0.03143	Production	37817098	37817102	QTL_ID=187971	trait=Metabolic_body_weight	Abbrev=MBW	breed=charolais,gelbvieh,hereford,limousin,simmental,Angus	rs133131583
6	block_145_chr_6	rs29026121	rs110517212	37778924	37933250	154326	0.03143	Production	37817308	37817312	QTL_ID=183189	trait=Dry_matter_intake	Abbrev=DMI	breed=charolais,gelbvieh,hereford,limousin,simmental,Angus	rs29025709
6	block_145_chr_6	rs29026121	rs110517212	37778924	37933250	154326	0.03143	Production	37817308	37817312	QTL_ID=185287	trait=Average_daily_gain	Abbrev=ADG	breed=charolais,gelbvieh,hereford,limousin,simmental,Angus	rs133669403
6	block_145_chr_6	rs29026121	rs110517212	37778924	37933250	154326	0.03143	Production	37817308	37817312	QTL_ID=188466	trait=Metabolic_body_weight	Abbrev=MBW	breed=charolais,gelbvieh,hereford,limousin,simmental,Angus	rs384279245
6	block_145_chr_6	rs29026121	rs110517212	37778924	37933250	154326	0.03143	Production	37817587	37817591	QTL_ID=131398	trait=Metabolic_body_weight	Abbrev=MBW	breed=charolais,gelbvieh,hereford,limousin,pinzgauer,red_angus,red_poll,simmental,Angus	rs132784815
6	block_145_chr_6	rs29026121	rs110517212	37778924	37933250	154326	0.03143	Production	37817587	37817591	QTL_ID=164081	trait=Body_weight_(birth)	Abbrev=BW	breed=charolais,gelbvieh,hereford,limousin,simmental,Angus	rs133119840
6	block_145_chr_6	rs29026121	rs110517212	37778924	37933250	154326	0.03143	Production	37817587	37817591	QTL_ID=164124	trait=Body_weight_(weaning)	Abbrev=WWT	breed=charolais,gelbvieh,hereford,limousin,simmental,Angus	rs137386109
6	block_145_chr_6	rs29026121	rs110517212	37778924	37933250	154326	0.03143	Production	37817587	37817591	QTL_ID=164147	trait=Average_daily_gain	Abbrev=ADG	breed=charolais,gelbvieh,hereford,limousin,simmental,Angus	rs208065122
6	block_145_chr_6	rs29026121	rs110517212	37778924	37933250	154326	0.03143	Production	37817587	37817591	QTL_ID=164180	trait=Body_weight_(yearling)	Abbrev=W365	breed=charolais,gelbvieh,hereford,limousin,simmental,Angus	rs135556144
6	block_145_chr_6	rs29026121	rs110517212	37778924	37933250	154326	0.03143	Production	37817587	37817591	QTL_ID=164304	trait=Average_daily_gain	Abbrev=ADG	breed=charolais,gelbvieh,hereford,limousin,simmental,Angus	rs109354753
6	block_145_chr_6	rs29026121	rs110517212	37778924	37933250	154326	0.03143	Production	37817587	37817591	QTL_ID=164382	trait=Body_weight_(birth)	Abbrev=BW	breed=charolais,gelbvieh,hereford,limousin,simmental,Angus	rs109164131
6	block_145_chr_6	rs29026121	rs110517212	37778924	37933250	154326	0.03143	Production	37817587	37817591	QTL_ID=164426	trait=Body_weight_(weaning)	Abbrev=WWT	breed=charolais,gelbvieh,hereford,limousin,simmental,Angus	rs109795305
6	block_145_chr_6	rs29026121	rs110517212	37778924	37933250	154326	0.03143	Production	37817587	37817591	QTL_ID=164454	trait=Average_daily_gain	Abbrev=ADG	breed=charolais,gelbvieh,hereford,limousin,simmental,Angus	rs135321958
6	block_145_chr_6	rs29026121	rs110517212	37778924	37933250	154326	0.03143	Production	37817587	37817591	QTL_ID=164500	trait=Body_weight_(yearling)	Abbrev=W365	breed=charolais,gelbvieh,hereford,limousin,simmental,Angus	rs137627844
6	block_145_chr_6	rs29026121	rs110517212	37778924	37933250	154326	0.03143	Production	37817587	37817591	QTL_ID=184465	trait=Average_daily_gain	Abbrev=ADG	breed=charolais,gelbvieh,hereford,limousin,simmental,Angus	rs135909505
6	block_145_chr_6	rs29026121	rs110517212	37778924	37933250	154326	0.03143	Production	37817587	37817591	QTL_ID=187222	trait=Metabolic_body_weight	Abbrev=MBW	breed=charolais,gelbvieh,hereford,limousin,simmental,Angus	rs209562973
6	block_145_chr_6	rs29026121	rs110517212	37778924	37933250	154326	0.03143	Production	37817587	37817591	QTL_ID=23727	trait=Body_weight_(birth)	Abbrev=BW	breed=jersey	rs109159923
6	block_145_chr_6	rs29026121	rs110517212	37778924	37933250	154326	0.03143	Production	37817587	37817591	QTL_ID=23728	trait=Metabolic_body_weight	Abbrev=MBW	breed=jersey	rs134558618
6	block_145_chr_6	rs29026121	rs110517212	37778924	37933250	154326	0.03143	Production	37817587	37817591	QTL_ID=66395	trait=Body_weight_(birth)	Abbrev=BW	breed=charolais,gelbvieh,hereford,limousin,pinzgauer,red_angus,red_poll,simmental,Angus	rs137833908
6	block_145_chr_6	rs29026121	rs110517212	37778924	37933250	154326	0.03143	Production	37817587	37817591	QTL_ID=66396	trait=Body_weight_(yearling)	Abbrev=W365	breed=charolais,gelbvieh,hereford,limousin,pinzgauer,red_angus,red_poll,simmental,Angus	rs137833908
6	block_145_chr_6	rs29026121	rs110517212	37778924	37933250	154326	0.03143	Production	37817587	37817591	QTL_ID=67312	trait=Body_weight_(weaning)	Abbrev=WWT	breed=jersey	rs110949002
6	block_145_chr_6	rs29026121	rs110517212	37778924	37933250	154326	0.03143	Production	37817587	37817591	QTL_ID=67313	trait=Body_weight_gain	Abbrev=BWG	breed=jersey	rs136299822
6	block_145_chr_6	rs29026121	rs110517212	37778924	37933250	154326	0.03143	Production	37817587	37817591	QTL_ID=67314	trait=Body_weight_gain	Abbrev=BWG	breed=charolais,gelbvieh,hereford,limousin,pinzgauer,red_angus,red_poll,simmental,Angus	rs110185249
6	block_145_chr_6	rs29026121	rs110517212	37778924	37933250	154326	0.03143	Production	37817587	37817591	QTL_ID=67315	trait=Body_weight_gain	Abbrev=BWG	breed=charolais,gelbvieh,hereford,limousin,pinzgauer,red_angus,red_poll,simmental,Angus	rs110185249
6	block_145_chr_6	rs29026121	rs110517212	37778924	37933250	154326	0.03143	Production	37817853	37817857	QTL_ID=183751	trait=Dry_matter_intake	Abbrev=DMI	breed=charolais,gelbvieh,hereford,limousin,simmental,Angus	rs109579682
6	block_145_chr_6	rs29026121	rs110517212	37778924	37933250	154326	0.03143	Production	37817853	37817857	QTL_ID=184397	trait=Average_daily_gain	Abbrev=ADG	breed=charolais,gelbvieh,hereford,limousin,simmental,Angus	rs41983284
6	block_145_chr_6	rs29026121	rs110517212	37778924	37933250	154326	0.03143	Production	37817853	37817857	QTL_ID=187114	trait=Metabolic_body_weight	Abbrev=MBW	breed=charolais,gelbvieh,hereford,limousin,simmental,Angus	rs379762586
6	block_145_chr_6	rs29026121	rs110517212	37778924	37933250	154326	0.03143	Production	37817873	37817877	QTL_ID=183173	trait=Dry_matter_intake	Abbrev=DMI	breed=charolais,gelbvieh,hereford,limousin,simmental,Angus	rs383916341
6	block_145_chr_6	rs29026121	rs110517212	37778924	37933250	154326	0.03143	Production	37817873	37817877	QTL_ID=184475	trait=Average_daily_gain	Abbrev=ADG	breed=charolais,gelbvieh,hereford,limousin,simmental,Angus	rs136363104
6	block_145_chr_6	rs29026121	rs110517212	37778924	37933250	154326	0.03143	Production	37817873	37817877	QTL_ID=187234	trait=Metabolic_body_weight	Abbrev=MBW	breed=charolais,gelbvieh,hereford,limousin,simmental,Angus	rs211035967
6	block_145_chr_6	rs29026121	rs110517212	37778924	37933250	154326	0.03143	Production	37817908	37817912	QTL_ID=183174	trait=Dry_matter_intake	Abbrev=DMI	breed=charolais,gelbvieh,hereford,limousin,simmental,Angus	rs110720284
6	block_145_chr_6	rs29026121	rs110517212	37778924	37933250	154326	0.03143	Production	37817908	37817912	QTL_ID=184121	trait=Average_daily_gain	Abbrev=ADG	breed=charolais,gelbvieh,hereford,limousin,simmental,Angus	rs109579682
6	block_145_chr_6	rs29026121	rs110517212	37778924	37933250	154326	0.03143	Production	37817908	37817912	QTL_ID=186745	trait=Metabolic_body_weight	Abbrev=MBW	breed=charolais,gelbvieh,hereford,limousin,simmental,Angus	rs135266057
6	block_145_chr_6	rs29026121	rs110517212	37778924	37933250	154326	0.03143	Production	37818105	37818109	QTL_ID=183175	trait=Dry_matter_intake	Abbrev=DMI	breed=charolais,gelbvieh,hereford,limousin,simmental,Angus	rs133219083
6	block_145_chr_6	rs29026121	rs110517212	37778924	37933250	154326	0.03143	Production	37818105	37818109	QTL_ID=184756	trait=Average_daily_gain	Abbrev=ADG	breed=norwegian_red	rs134606859
6	block_145_chr_6	rs29026121	rs110517212	37778924	37933250	154326	0.03143	Production	37818105	37818109	QTL_ID=187666	trait=Metabolic_body_weight	Abbrev=MBW	breed=charolais,gelbvieh,hereford,limousin,simmental,Angus	rs43460025
6	block_145_chr_6	rs29026121	rs110517212	37778924	37933250	154326	0.03143	Production	37818109	37818113	QTL_ID=184383	trait=Average_daily_gain	Abbrev=ADG	breed=charolais,gelbvieh,hereford,limousin,simmental,Angus	rs381935005,rs41983284,rs382782666
6	block_145_chr_6	rs29026121	rs110517212	37778924	37933250	154326	0.03143	Production	37818109	37818113	QTL_ID=187097	trait=Metabolic_body_weight	Abbrev=MBW	breed=charolais,gelbvieh,hereford,limousin,simmental,Angus	rs378576513
6	block_145_chr_6	rs29026121	rs110517212	37778924	37933250	154326	0.03143	Production	37818193	37818197	QTL_ID=131382	trait=Metabolic_body_weight	Abbrev=MBW	breed=holstein	rs109125092
6	block_145_chr_6	rs29026121	rs110517212	37778924	37933250	154326	0.03143	Production	37818193	37818197	QTL_ID=183176	trait=Dry_matter_intake	Abbrev=DMI	breed=charolais,gelbvieh,hereford,limousin,simmental,Angus	rs137815186
6	block_145_chr_6	rs29026121	rs110517212	37778924	37933250	154326	0.03143	Production	37818193	37818197	QTL_ID=185131	trait=Average_daily_gain	Abbrev=ADG	breed=charolais,gelbvieh,hereford,limousin,simmental,Angus	rs109164431
6	block_145_chr_6	rs29026121	rs110517212	37778924	37933250	154326	0.03143	Production	37818193	37818197	QTL_ID=188240	trait=Metabolic_body_weight	Abbrev=MBW	breed=norwegian_red	rs381758503
6	block_145_chr_6	rs29026121	rs110517212	37778924	37933250	154326	0.03143	Production	37818370	37818374	QTL_ID=183177	trait=Dry_matter_intake	Abbrev=DMI	breed=charolais,gelbvieh,hereford,limousin,simmental,Angus	rs383916341
6	block_145_chr_6	rs29026121	rs110517212	37778924	37933250	154326	0.03143	Production	37818370	37818374	QTL_ID=185022	trait=Average_daily_gain	Abbrev=ADG	breed=charolais,gelbvieh,hereford,limousin,simmental,Angus	rs110927370
6	block_145_chr_6	rs29026121	rs110517212	37778924	37933250	154326	0.03143	Production	37818370	37818374	QTL_ID=188070	trait=Metabolic_body_weight	Abbrev=MBW	breed=charolais,gelbvieh,hereford,limousin,simmental,Angus	rs381559668
6	block_145_chr_6	rs29026121	rs110517212	37778924	37933250	154326	0.03143	Production	37818380	37818384	QTL_ID=185439	trait=Average_daily_gain	Abbrev=ADG	breed=charolais,gelbvieh,hereford,limousin,simmental,Angus	rs136611856
6	block_145_chr_6	rs29026121	rs110517212	37778924	37933250	154326	0.03143	Production	37818380	37818384	QTL_ID=188689	trait=Metabolic_body_weight	Abbrev=MBW	breed=charolais,gelbvieh,hereford,limousin,simmental,Angus	rs381935597
6	block_145_chr_6	rs29026121	rs110517212	37778924	37933250	154326	0.03143	Production	37818501	37818505	QTL_ID=183275	trait=Dry_matter_intake	Abbrev=DMI	breed=charolais,gelbvieh,hereford,limousin,simmental,Angus	rs29025709
6	block_145_chr_6	rs29026121	rs110517212	37778924	37933250	154326	0.03143	Production	37818501	37818505	QTL_ID=184937	trait=Average_daily_gain	Abbrev=ADG	breed=charolais,gelbvieh,hereford,limousin,simmental,Angus	rs133874113
6	block_145_chr_6	rs29026121	rs110517212	37778924	37933250	154326	0.03143	Production	37818501	37818505	QTL_ID=187943	trait=Metabolic_body_weight	Abbrev=MBW	breed=charolais,gelbvieh,hereford,limousin,simmental,Angus	rs110720284
6	block_145_chr_6	rs29026121	rs110517212	37778924	37933250	154326	0.03143	Production	37819222	37819226	QTL_ID=131383	trait=Metabolic_body_weight	Abbrev=MBW	breed=charolais,chianina,gelbvieh,hereford,holstein,limousin,piedmontese,red_angus,simmental,Angus,Maine-Anjou	rs135146886
6	block_145_chr_6	rs29026121	rs110517212	37778924	37933250	154326	0.03143	Production	37819222	37819226	QTL_ID=185301	trait=Average_daily_gain	Abbrev=ADG	breed=charolais,gelbvieh,hereford,limousin,simmental,Angus	rs109579682
6	block_145_chr_6	rs29026121	rs110517212	37778924	37933250	154326	0.03143	Production	37819222	37819226	QTL_ID=188481	trait=Metabolic_body_weight	Abbrev=MBW	breed=charolais,gelbvieh,hereford,limousin,simmental,Angus	rs384476493
6	block_145_chr_6	rs29026121	rs110517212	37778924	37933250	154326	0.03143	Production	37821521	37821525	QTL_ID=186309	trait=Average_daily_gain	Abbrev=ADG	breed=charolais,gelbvieh,hereford,limousin,simmental,Angus	rs43457947
6	block_145_chr_6	rs29026121	rs110517212	37778924	37933250	154326	0.03143	Production	37821521	37821525	QTL_ID=190234	trait=Metabolic_body_weight	Abbrev=MBW	breed=charolais,gelbvieh,hereford,limousin,simmental,Angus	rs43457988
6	block_145_chr_6	rs29026121	rs110517212	37778924	37933250	154326	0.03143	Production	37821593	37821597	QTL_ID=131384	trait=Metabolic_body_weight	Abbrev=MBW	breed=holstein	rs135587800
6	block_145_chr_6	rs29026121	rs110517212	37778924	37933250	154326	0.03143	Production	37821593	37821597	QTL_ID=186310	trait=Average_daily_gain	Abbrev=ADG	breed=charolais,gelbvieh,hereford,limousin,simmental,Angus	rs109039951
6	block_145_chr_6	rs29026121	rs110517212	37778924	37933250	154326	0.03143	Production	37821593	37821597	QTL_ID=190235	trait=Metabolic_body_weight	Abbrev=MBW	breed=charolais,gelbvieh,hereford,limousin,simmental,Angus	rs109078456
6	block_145_chr_6	rs29026121	rs110517212	37778924	37933250	154326	0.03143	Production	37821962	37821966	QTL_ID=184785	trait=Average_daily_gain	Abbrev=ADG	breed=charolais,gelbvieh,hereford,limousin,simmental,Angus	rs43457933
6	block_145_chr_6	rs29026121	rs110517212	37778924	37933250	154326	0.03143	Production	37821962	37821966	QTL_ID=187700	trait=Metabolic_body_weight	Abbrev=MBW	breed=charolais,gelbvieh,hereford,limousin,simmental,Angus	rs41595994
6	block_145_chr_6	rs29026121	rs110517212	37778924	37933250	154326	0.03143	Production	37825818	37825822	QTL_ID=184839	trait=Average_daily_gain	Abbrev=ADG	breed=charolais,gelbvieh,hereford,limousin,simmental,Angus	rs137813274
6	block_145_chr_6	rs29026121	rs110517212	37778924	37933250	154326	0.03143	Production	37825818	37825822	QTL_ID=187788	trait=Metabolic_body_weight	Abbrev=MBW	breed=charolais,gelbvieh,hereford,limousin,simmental,Angus	rs110207017
6	block_145_chr_6	rs29026121	rs110517212	37778924	37933250	154326	0.03143	Production	37825907	37825911	QTL_ID=190133	trait=Metabolic_body_weight	Abbrev=MBW	breed=charolais,gelbvieh,hereford,limousin,simmental,Angus	rs43457984
6	block_145_chr_6	rs29026121	rs110517212	37778924	37933250	154326	0.03143	Production	37826151	37826155	QTL_ID=185066	trait=Average_daily_gain	Abbrev=ADG	breed=charolais,gelbvieh,hereford,limousin,simmental,Angus	rs109039951
6	block_145_chr_6	rs29026121	rs110517212	37778924	37933250	154326	0.03143	Production	37826151	37826155	QTL_ID=188147	trait=Metabolic_body_weight	Abbrev=MBW	breed=charolais,gelbvieh,hereford,limousin,simmental,Angus	rs41651314
6	block_145_chr_6	rs29026121	rs110517212	37778924	37933250	154326	0.03143	Production	37830097	37830101	QTL_ID=185379	trait=Average_daily_gain	Abbrev=ADG	breed=charolais,gelbvieh,hereford,limousin,simmental,Angus	rs208163207
6	block_145_chr_6	rs29026121	rs110517212	37778924	37933250	154326	0.03143	Production	37830097	37830101	QTL_ID=188604	trait=Metabolic_body_weight	Abbrev=MBW	breed=charolais,gelbvieh,hereford,limousin,simmental,Angus	rs379960984
6	block_145_chr_6	rs29026121	rs110517212	37778924	37933250	154326	0.03143	Production	37831624	37831628	QTL_ID=131385	trait=Metabolic_body_weight	Abbrev=MBW	breed=holstein	rs137167583
6	block_145_chr_6	rs29026121	rs110517212	37778924	37933250	154326	0.03143	Production	37831624	37831628	QTL_ID=184754	trait=Average_daily_gain	Abbrev=ADG	breed=charolais,gelbvieh,hereford,limousin,simmental,Angus	rs211382143
6	block_145_chr_6	rs29026121	rs110517212	37778924	37933250	154326	0.03143	Production	37831624	37831628	QTL_ID=187662	trait=Metabolic_body_weight	Abbrev=MBW	breed=charolais,gelbvieh,hereford,limousin,simmental,Angus	rs378025417
6	block_145_chr_6	rs29026121	rs110517212	37778924	37933250	154326	0.03143	Production	37833437	37833441	QTL_ID=185234	trait=Average_daily_gain	Abbrev=ADG	breed=charolais,gelbvieh,hereford,limousin,simmental,Angus	rs43458016
6	block_145_chr_6	rs29026121	rs110517212	37778924	37933250	154326	0.03143	Production	37833437	37833441	QTL_ID=188394	trait=Metabolic_body_weight	Abbrev=MBW	breed=charolais,gelbvieh,hereford,limousin,simmental,Angus	rs110805476
6	block_145_chr_6	rs29026121	rs110517212	37778924	37933250	154326	0.03143	Production	37834313	37834317	QTL_ID=182557	trait=Dry_matter_intake	Abbrev=DMI	breed=charolais,gelbvieh,hereford,limousin,simmental,Angus	rs111005120
6	block_145_chr_6	rs29026121	rs110517212	37778924	37933250	154326	0.03143	Production	37834313	37834317	QTL_ID=184569	trait=Average_daily_gain	Abbrev=ADG	breed=charolais,gelbvieh,hereford,limousin,simmental,Angus	rs211355233
6	block_145_chr_6	rs29026121	rs110517212	37778924	37933250	154326	0.03143	Production	37834313	37834317	QTL_ID=187377	trait=Metabolic_body_weight	Abbrev=MBW	breed=charolais,gelbvieh,hereford,limousin,simmental,Angus	rs110746748
6	block_145_chr_6	rs29026121	rs110517212	37778924	37933250	154326	0.03143	Production	37837436	37837440	QTL_ID=186218	trait=Average_daily_gain	Abbrev=ADG	breed=charolais,gelbvieh,hereford,limousin,simmental,Angus	rs210852181
6	block_145_chr_6	rs29026121	rs110517212	37778924	37933250	154326	0.03143	Production	37837436	37837440	QTL_ID=190134	trait=Metabolic_body_weight	Abbrev=MBW	breed=charolais,gelbvieh,hereford,limousin,simmental,Angus	rs379050681
6	block_145_chr_6	rs29026121	rs110517212	37778924	37933250	154326	0.03143	Production	37837603	37837607	QTL_ID=190135	trait=Metabolic_body_weight	Abbrev=MBW	breed=charolais,gelbvieh,hereford,limousin,simmental,Angus	rs110133275
6	block_145_chr_6	rs29026121	rs110517212	37778924	37933250	154326	0.03143	Production	37837603	37837607	QTL_ID=66566	trait=Body_weight_(birth)	Abbrev=BW	breed=holstein	rs135745991
6	block_145_chr_6	rs29026121	rs110517212	37778924	37933250	154326	0.03143	Production	37837603	37837607	QTL_ID=66567	trait=Body_weight_(yearling)	Abbrev=W365	breed=holstein	rs110616484
6	block_145_chr_6	rs29026121	rs110517212	37778924	37933250	154326	0.03143	Production	37837603	37837607	QTL_ID=66568	trait=Body_weight_gain	Abbrev=BWG	breed=holstein	rs109849955
6	block_145_chr_6	rs29026121	rs110517212	37778924	37933250	154326	0.03143	Production	37837603	37837607	QTL_ID=66569	trait=Body_weight_gain	Abbrev=BWG	breed=holstein	rs110616484
6	block_145_chr_6	rs29026121	rs110517212	37778924	37933250	154326	0.03143	Production	37837603	37837607	QTL_ID=67715	trait=Body_weight_(weaning)	Abbrev=WWT	breed=holstein	rs109849955
6	block_145_chr_6	rs29026121	rs110517212	37778924	37933250	154326	0.03143	Production	37837603	37837607	QTL_ID=67716	trait=Body_weight_gain	Abbrev=BWG	breed=norwegian_red	rs110010080
6	block_145_chr_6	rs29026121	rs110517212	37778924	37933250	154326	0.03143	Production	37838620	37838624	QTL_ID=182469	trait=Dry_matter_intake	Abbrev=DMI	breed=charolais,gelbvieh,hereford,limousin,simmental,Angus	rs135330727
6	block_145_chr_6	rs29026121	rs110517212	37778924	37933250	154326	0.03143	Production	37838620	37838624	QTL_ID=185446	trait=Average_daily_gain	Abbrev=ADG	breed=charolais,gelbvieh,hereford,limousin,simmental,Angus	rs383789879
6	block_145_chr_6	rs29026121	rs110517212	37778924	37933250	154326	0.03143	Production	37838620	37838624	QTL_ID=188705	trait=Metabolic_body_weight	Abbrev=MBW	breed=charolais,gelbvieh,hereford,limousin,simmental,Angus	rs382230462
6	block_145_chr_6	rs29026121	rs110517212	37778924	37933250	154326	0.03143	Production	37842390	37842394	QTL_ID=190136	trait=Metabolic_body_weight	Abbrev=MBW	breed=charolais,gelbvieh,hereford,limousin,simmental,Angus	rs109473307
6	block_145_chr_6	rs29026121	rs110517212	37778924	37933250	154326	0.03143	Production	37861459	37861463	QTL_ID=190137	trait=Metabolic_body_weight	Abbrev=MBW	breed=charolais,gelbvieh,hereford,limousin,simmental,Angus	rs108983045
6	block_145_chr_6	rs29026121	rs110517212	37778924	37933250	154326	0.03143	Production	37875982	37875986	QTL_ID=24721	trait=Body_weight_(weaning)	Abbrev=WWT	breed=ayrshire,danish_red,Swedish_Red-and-White	rs136371364
6	block_145_chr_6	rs29026121	rs110517212	37778924	37933250	154326	0.03143	Production	37875982	37875986	QTL_ID=24788	trait=Body_weight_(yearling)	Abbrev=W365	breed=holstein	rs136371364
6	block_145_chr_6	rs29026121	rs110517212	37778924	37933250	154326	0.03143	Production	37900827	37900831	QTL_ID=190052	trait=Metabolic_body_weight	Abbrev=MBW	breed=charolais,gelbvieh,hereford,limousin,simmental,Angus	rs384797212
6	block_145_chr_6	rs29026121	rs110517212	37778924	37933250	154326	0.03143	Production	37902753	37902757	QTL_ID=182595	trait=Dry_matter_intake	Abbrev=DMI	breed=charolais,gelbvieh,hereford,limousin,simmental,Angus	rs134998281
6	block_145_chr_6	rs29026121	rs110517212	37778924	37933250	154326	0.03143	Production	37902753	37902757	QTL_ID=183983	trait=Average_daily_gain	Abbrev=ADG	breed=charolais,gelbvieh,hereford,limousin,simmental,Angus	rs109191200,rs110408618,rs135082644
6	block_145_chr_6	rs29026121	rs110517212	37778924	37933250	154326	0.03143	Production	37902753	37902757	QTL_ID=186553	trait=Metabolic_body_weight	Abbrev=MBW	breed=charolais,gelbvieh,hereford,limousin,simmental,Angus	rs137502911
6	block_145_chr_6	rs29026121	rs110517212	37778924	37933250	154326	0.03143	Production	37904996	37905000	QTL_ID=182087	trait=Dry_matter_intake	Abbrev=DMI	breed=charolais,gelbvieh,hereford,limousin,simmental,Angus	rs109434276
6	block_145_chr_6	rs29026121	rs110517212	37778924	37933250	154326	0.03143	Production	37904996	37905000	QTL_ID=186159	trait=Average_daily_gain	Abbrev=ADG	breed=charolais,gelbvieh,hereford,limousin,simmental,Angus	rs109191200,rs110408618,rs135082644
6	block_145_chr_6	rs29026121	rs110517212	37778924	37933250	154326	0.03143	Production	37904996	37905000	QTL_ID=190051	trait=Metabolic_body_weight	Abbrev=MBW	breed=charolais,gelbvieh,hereford,limousin,simmental,Angus	rs134085967
6	block_145_chr_6	rs29026121	rs110517212	37778924	37933250	154326	0.03143	Production	37905294	37905298	QTL_ID=182645	trait=Dry_matter_intake	Abbrev=DMI	breed=charolais,gelbvieh,hereford,limousin,simmental,Angus	rs135846454
6	block_145_chr_6	rs29026121	rs110517212	37778924	37933250	154326	0.03143	Production	37905294	37905298	QTL_ID=184551	trait=Average_daily_gain	Abbrev=ADG	breed=charolais,gelbvieh,hereford,limousin,simmental,Angus	rs133109749
6	block_145_chr_6	rs29026121	rs110517212	37778924	37933250	154326	0.03143	Production	37905294	37905298	QTL_ID=187351	trait=Metabolic_body_weight	Abbrev=MBW	breed=charolais,gelbvieh,hereford,limousin,simmental,Angus	rs109279094
6	block_145_chr_6	rs29026121	rs110517212	37778924	37933250	154326	0.03143	Production	37905465	37905469	QTL_ID=182602	trait=Dry_matter_intake	Abbrev=DMI	breed=charolais,gelbvieh,hereford,limousin,simmental,Angus	rs108967640
6	block_145_chr_6	rs29026121	rs110517212	37778924	37933250	154326	0.03143	Production	37905465	37905469	QTL_ID=185051	trait=Average_daily_gain	Abbrev=ADG	breed=charolais,gelbvieh,hereford,limousin,simmental,Angus	rs109191200,rs110408618,rs135082644
6	block_145_chr_6	rs29026121	rs110517212	37778924	37933250	154326	0.03143	Production	37905465	37905469	QTL_ID=188112	trait=Metabolic_body_weight	Abbrev=MBW	breed=charolais,gelbvieh,hereford,limousin,simmental,Angus	rs109279094
6	block_145_chr_6	rs29026121	rs110517212	37778924	37933250	154326	0.03143	Production	37907355	37907359	QTL_ID=182619	trait=Dry_matter_intake	Abbrev=DMI	breed=charolais,gelbvieh,hereford,limousin,simmental,Angus	rs108967640
6	block_145_chr_6	rs29026121	rs110517212	37778924	37933250	154326	0.03143	Production	37907355	37907359	QTL_ID=185210	trait=Average_daily_gain	Abbrev=ADG	breed=charolais,gelbvieh,hereford,limousin,simmental,Angus	rs109191200,rs110408618,rs135082644
6	block_145_chr_6	rs29026121	rs110517212	37778924	37933250	154326	0.03143	Production	37907355	37907359	QTL_ID=188354	trait=Metabolic_body_weight	Abbrev=MBW	breed=charolais,gelbvieh,hereford,limousin,simmental,Angus	rs109279094
6	block_145_chr_6	rs29026121	rs110517212	37778924	37933250	154326	0.03143	Production	37908476	37908480	QTL_ID=164082	trait=Body_weight_(birth)	Abbrev=BW	breed=holstein	rs41651316
6	block_145_chr_6	rs29026121	rs110517212	37778924	37933250	154326	0.03143	Production	37908476	37908480	QTL_ID=164125	trait=Body_weight_(weaning)	Abbrev=WWT	breed=holstein	rs379061965
6	block_145_chr_6	rs29026121	rs110517212	37778924	37933250	154326	0.03143	Production	37908476	37908480	QTL_ID=164134	trait=Average_daily_gain	Abbrev=ADG	breed=holstein	rs43002212
6	block_145_chr_6	rs29026121	rs110517212	37778924	37933250	154326	0.03143	Production	37908476	37908480	QTL_ID=164148	trait=Average_daily_gain	Abbrev=ADG	breed=holstein	rs29017713
6	block_145_chr_6	rs29026121	rs110517212	37778924	37933250	154326	0.03143	Production	37908476	37908480	QTL_ID=164181	trait=Body_weight_(yearling)	Abbrev=W365	breed=norwegian_red	rs109139796
6	block_145_chr_6	rs29026121	rs110517212	37778924	37933250	154326	0.03143	Production	37908476	37908480	QTL_ID=164383	trait=Body_weight_(birth)	Abbrev=BW	breed=charolais,gelbvieh,hereford,limousin,simmental,Angus	rs109550729
6	block_145_chr_6	rs29026121	rs110517212	37778924	37933250	154326	0.03143	Production	37908476	37908480	QTL_ID=164455	trait=Average_daily_gain	Abbrev=ADG	breed=charolais,gelbvieh,hereford,limousin,simmental,Angus	rs109550729
6	block_145_chr_6	rs29026121	rs110517212	37778924	37933250	154326	0.03143	Production	37908476	37908480	QTL_ID=164501	trait=Body_weight_(yearling)	Abbrev=W365	breed=charolais,gelbvieh,hereford,limousin,simmental,Angus	rs109550729
6	block_145_chr_6	rs29026121	rs110517212	37778924	37933250	154326	0.03143	Production	37908476	37908480	QTL_ID=182608	trait=Dry_matter_intake	Abbrev=DMI	breed=charolais,gelbvieh,hereford,limousin,simmental,Angus	rs108967640
6	block_145_chr_6	rs29026121	rs110517212	37778924	37933250	154326	0.03143	Production	37908476	37908480	QTL_ID=184365	trait=Average_daily_gain	Abbrev=ADG	breed=charolais,gelbvieh,hereford,limousin,simmental,Angus	rs135638362
6	block_145_chr_6	rs29026121	rs110517212	37778924	37933250	154326	0.03143	Production	37908476	37908480	QTL_ID=187065	trait=Metabolic_body_weight	Abbrev=MBW	breed=charolais,gelbvieh,hereford,limousin,simmental,Angus	rs134334613
6	block_145_chr_6	rs29026121	rs110517212	37778924	37933250	154326	0.03143	Production	37908476	37908480	QTL_ID=23729	trait=Body_weight_(birth)	Abbrev=BW	breed=holstein	rs133242881
6	block_145_chr_6	rs29026121	rs110517212	37778924	37933250	154326	0.03143	Production	37908505	37908509	QTL_ID=182594	trait=Dry_matter_intake	Abbrev=DMI	breed=charolais,gelbvieh,hereford,limousin,simmental,Angus	rs109605668
6	block_145_chr_6	rs29026121	rs110517212	37778924	37933250	154326	0.03143	Production	37908505	37908509	QTL_ID=184022	trait=Average_daily_gain	Abbrev=ADG	breed=charolais,gelbvieh,hereford,limousin,simmental,Angus	rs109191200,rs110408618,rs135082644
6	block_145_chr_6	rs29026121	rs110517212	37778924	37933250	154326	0.03143	Production	37908505	37908509	QTL_ID=186610	trait=Metabolic_body_weight	Abbrev=MBW	breed=charolais,gelbvieh,hereford,limousin,simmental,Angus	rs135981428
6	block_145_chr_6	rs29026121	rs110517212	37778924	37933250	154326	0.03143	Production	37908677	37908681	QTL_ID=182102	trait=Dry_matter_intake	Abbrev=DMI	breed=charolais,gelbvieh,hereford,limousin,simmental,Angus	rs109345746
6	block_145_chr_6	rs29026121	rs110517212	37778924	37933250	154326	0.03143	Production	37908677	37908681	QTL_ID=186158	trait=Average_daily_gain	Abbrev=ADG	breed=charolais,gelbvieh,hereford,limousin,simmental,Angus	rs109191200,rs110408618,rs135082644
6	block_145_chr_6	rs29026121	rs110517212	37778924	37933250	154326	0.03143	Production	37908677	37908681	QTL_ID=190050	trait=Metabolic_body_weight	Abbrev=MBW	breed=charolais,gelbvieh,hereford,limousin,simmental,Angus	rs136842171
6	block_145_chr_6	rs29026121	rs110517212	37778924	37933250	154326	0.03143	Production	37908859	37908863	QTL_ID=182196	trait=Dry_matter_intake	Abbrev=DMI	breed=charolais,gelbvieh,hereford,limousin,simmental,Angus	rs43457937
6	block_145_chr_6	rs29026121	rs110517212	37778924	37933250	154326	0.03143	Production	37908859	37908863	QTL_ID=186157	trait=Average_daily_gain	Abbrev=ADG	breed=charolais,gelbvieh,hereford,limousin,simmental,Angus	rs109191200,rs110408618,rs135082644
6	block_145_chr_6	rs29026121	rs110517212	37778924	37933250	154326	0.03143	Production	37908859	37908863	QTL_ID=190049	trait=Metabolic_body_weight	Abbrev=MBW	breed=charolais,gelbvieh,hereford,limousin,simmental,Angus	rs110168514
6	block_145_chr_6	rs29026121	rs110517212	37778924	37933250	154326	0.03143	Production	37908960	37908964	QTL_ID=182236	trait=Dry_matter_intake	Abbrev=DMI	breed=charolais,gelbvieh,hereford,limousin,simmental,Angus	rs43457937
6	block_145_chr_6	rs29026121	rs110517212	37778924	37933250	154326	0.03143	Production	37908960	37908964	QTL_ID=186156	trait=Average_daily_gain	Abbrev=ADG	breed=charolais,gelbvieh,hereford,limousin,simmental,Angus	rs109191200,rs110408618,rs135082644
6	block_145_chr_6	rs29026121	rs110517212	37778924	37933250	154326	0.03143	Production	37908960	37908964	QTL_ID=190048	trait=Metabolic_body_weight	Abbrev=MBW	breed=charolais,gelbvieh,hereford,limousin,simmental,Angus	rs110043972
6	block_145_chr_6	rs29026121	rs110517212	37778924	37933250	154326	0.03143	Production	37909141	37909145	QTL_ID=182466	trait=Dry_matter_intake	Abbrev=DMI	breed=charolais,gelbvieh,hereford,limousin,simmental,Angus	rs109605668
6	block_145_chr_6	rs29026121	rs110517212	37778924	37933250	154326	0.03143	Production	37909141	37909145	QTL_ID=186155	trait=Average_daily_gain	Abbrev=ADG	breed=charolais,gelbvieh,hereford,limousin,simmental,Angus	rs109191200,rs110408618,rs135082644
6	block_145_chr_6	rs29026121	rs110517212	37778924	37933250	154326	0.03143	Production	37909141	37909145	QTL_ID=190047	trait=Metabolic_body_weight	Abbrev=MBW	breed=charolais,gelbvieh,hereford,limousin,simmental,Angus	rs109979076
6	block_145_chr_6	rs29026121	rs110517212	37778924	37933250	154326	0.03143	Production	37910274	37910278	QTL_ID=182179	trait=Dry_matter_intake	Abbrev=DMI	breed=charolais,gelbvieh,hereford,limousin,simmental,Angus	rs137182248
6	block_145_chr_6	rs29026121	rs110517212	37778924	37933250	154326	0.03143	Production	37910274	37910278	QTL_ID=186154	trait=Average_daily_gain	Abbrev=ADG	breed=charolais,gelbvieh,hereford,limousin,simmental,Angus	rs109191200,rs110408618,rs135082644
6	block_145_chr_6	rs29026121	rs110517212	37778924	37933250	154326	0.03143	Production	37910274	37910278	QTL_ID=190046	trait=Metabolic_body_weight	Abbrev=MBW	breed=charolais,gelbvieh,hereford,limousin,simmental,Angus	rs109661142
6	block_145_chr_6	rs29026121	rs110517212	37778924	37933250	154326	0.03143	Production	37910462	37910466	QTL_ID=182634	trait=Dry_matter_intake	Abbrev=DMI	breed=charolais,gelbvieh,hereford,limousin,simmental,Angus	rs110596001
6	block_145_chr_6	rs29026121	rs110517212	37778924	37933250	154326	0.03143	Production	37910462	37910466	QTL_ID=186153	trait=Average_daily_gain	Abbrev=ADG	breed=charolais,gelbvieh,hereford,limousin,simmental,Angus	rs43458005,rs110939004
6	block_145_chr_6	rs29026121	rs110517212	37778924	37933250	154326	0.03143	Production	37910462	37910466	QTL_ID=190045	trait=Metabolic_body_weight	Abbrev=MBW	breed=charolais,gelbvieh,hereford,limousin,simmental,Angus	rs41621082
6	block_145_chr_6	rs29026121	rs110517212	37778924	37933250	154326	0.03143	Production	37910476	37910480	QTL_ID=182635	trait=Dry_matter_intake	Abbrev=DMI	breed=charolais,gelbvieh,hereford,limousin,simmental,Angus	rs108989350
6	block_145_chr_6	rs29026121	rs110517212	37778924	37933250	154326	0.03143	Production	37910476	37910480	QTL_ID=186152	trait=Average_daily_gain	Abbrev=ADG	breed=charolais,gelbvieh,hereford,limousin,simmental,Angus	rs109780342
6	block_145_chr_6	rs29026121	rs110517212	37778924	37933250	154326	0.03143	Production	37910476	37910480	QTL_ID=190044	trait=Metabolic_body_weight	Abbrev=MBW	breed=charolais,gelbvieh,hereford,limousin,simmental,Angus	rs41621081
6	block_145_chr_6	rs29026121	rs110517212	37778924	37933250	154326	0.03143	Production	37910864	37910868	QTL_ID=182399	trait=Dry_matter_intake	Abbrev=DMI	breed=charolais,gelbvieh,hereford,limousin,simmental,Angus	rs109296603
6	block_145_chr_6	rs29026121	rs110517212	37778924	37933250	154326	0.03143	Production	37910864	37910868	QTL_ID=186151	trait=Average_daily_gain	Abbrev=ADG	breed=charolais,gelbvieh,hereford,limousin,simmental,Angus	rs109020535
6	block_145_chr_6	rs29026121	rs110517212	37778924	37933250	154326	0.03143	Production	37910864	37910868	QTL_ID=190043	trait=Metabolic_body_weight	Abbrev=MBW	breed=charolais,gelbvieh,hereford,limousin,simmental,Angus	rs134864359
6	block_145_chr_6	rs29026121	rs110517212	37778924	37933250	154326	0.03143	Production	37911812	37911816	QTL_ID=182487	trait=Dry_matter_intake	Abbrev=DMI	breed=charolais,gelbvieh,hereford,limousin,simmental,Angus	rs110278830
6	block_145_chr_6	rs29026121	rs110517212	37778924	37933250	154326	0.03143	Production	37911812	37911816	QTL_ID=186150	trait=Average_daily_gain	Abbrev=ADG	breed=charolais,gelbvieh,hereford,limousin,simmental,Angus	rs137437694
6	block_145_chr_6	rs29026121	rs110517212	37778924	37933250	154326	0.03143	Production	37911812	37911816	QTL_ID=190042	trait=Metabolic_body_weight	Abbrev=MBW	breed=charolais,gelbvieh,hereford,limousin,simmental,Angus	rs132741344
6	block_145_chr_6	rs29026121	rs110517212	37778924	37933250	154326	0.03143	Production	37912114	37912118	QTL_ID=182383	trait=Dry_matter_intake	Abbrev=DMI	breed=charolais,gelbvieh,hereford,limousin,simmental,Angus	rs109495237
6	block_145_chr_6	rs29026121	rs110517212	37778924	37933250	154326	0.03143	Production	37912114	37912118	QTL_ID=186149	trait=Average_daily_gain	Abbrev=ADG	breed=charolais,gelbvieh,hereford,limousin,simmental,Angus	rs109020535
6	block_145_chr_6	rs29026121	rs110517212	37778924	37933250	154326	0.03143	Production	37912114	37912118	QTL_ID=190041	trait=Metabolic_body_weight	Abbrev=MBW	breed=charolais,gelbvieh,hereford,limousin,simmental,Angus	rs110435228
6	block_145_chr_6	rs29026121	rs110517212	37778924	37933250	154326	0.03143	Production	37913123	37913127	QTL_ID=184145	trait=Average_daily_gain	Abbrev=ADG	breed=charolais,gelbvieh,hereford,limousin,simmental,Angus	rs41567028
6	block_145_chr_6	rs29026121	rs110517212	37778924	37933250	154326	0.03143	Production	37913650	37913654	QTL_ID=182216	trait=Dry_matter_intake	Abbrev=DMI	breed=charolais,gelbvieh,hereford,limousin,simmental,Angus	rs135579545
6	block_145_chr_6	rs29026121	rs110517212	37778924	37933250	154326	0.03143	Production	37913650	37913654	QTL_ID=186148	trait=Average_daily_gain	Abbrev=ADG	breed=charolais,gelbvieh,hereford,limousin,simmental,Angus	rs137437694
6	block_145_chr_6	rs29026121	rs110517212	37778924	37933250	154326	0.03143	Production	37913650	37913654	QTL_ID=190040	trait=Metabolic_body_weight	Abbrev=MBW	breed=charolais,gelbvieh,hereford,limousin,simmental,Angus	rs133669403
6	block_145_chr_6	rs29026121	rs110517212	37778924	37933250	154326	0.03143	Production	37913725	37913729	QTL_ID=182182	trait=Dry_matter_intake	Abbrev=DMI	breed=charolais,gelbvieh,hereford,limousin,simmental,Angus	rs134133374
6	block_145_chr_6	rs29026121	rs110517212	37778924	37933250	154326	0.03143	Production	37913725	37913729	QTL_ID=186147	trait=Average_daily_gain	Abbrev=ADG	breed=charolais,gelbvieh,hereford,limousin,simmental,Angus	rs109020535
6	block_145_chr_6	rs29026121	rs110517212	37778924	37933250	154326	0.03143	Production	37913725	37913729	QTL_ID=190039	trait=Metabolic_body_weight	Abbrev=MBW	breed=charolais,gelbvieh,hereford,limousin,simmental,Angus	rs133669403
6	block_145_chr_6	rs29026121	rs110517212	37778924	37933250	154326	0.03143	Production	37913920	37913924	QTL_ID=182210	trait=Dry_matter_intake	Abbrev=DMI	breed=charolais,gelbvieh,hereford,limousin,simmental,Angus	rs110282584
6	block_145_chr_6	rs29026121	rs110517212	37778924	37933250	154326	0.03143	Production	37913920	37913924	QTL_ID=184775	trait=Average_daily_gain	Abbrev=ADG	breed=charolais,gelbvieh,hereford,limousin,simmental,Angus	rs110057198
6	block_145_chr_6	rs29026121	rs110517212	37778924	37933250	154326	0.03143	Production	37913920	37913924	QTL_ID=187690	trait=Metabolic_body_weight	Abbrev=MBW	breed=charolais,gelbvieh,hereford,limousin,simmental,Angus	rs109106016
6	block_145_chr_6	rs29026121	rs110517212	37778924	37933250	154326	0.03143	Production	37913938	37913942	QTL_ID=182189	trait=Dry_matter_intake	Abbrev=DMI	breed=charolais,gelbvieh,hereford,limousin,simmental,Angus	rs109233674
6	block_145_chr_6	rs29026121	rs110517212	37778924	37933250	154326	0.03143	Production	37913938	37913942	QTL_ID=186146	trait=Average_daily_gain	Abbrev=ADG	breed=charolais,gelbvieh,hereford,limousin,simmental,Angus	rs137437694
6	block_145_chr_6	rs29026121	rs110517212	37778924	37933250	154326	0.03143	Production	37913938	37913942	QTL_ID=190038	trait=Metabolic_body_weight	Abbrev=MBW	breed=charolais,gelbvieh,hereford,limousin,simmental,Angus	rs109435799
6	block_145_chr_6	rs29026121	rs110517212	37778924	37933250	154326	0.03143	Production	37914437	37914441	QTL_ID=182131	trait=Dry_matter_intake	Abbrev=DMI	breed=charolais,gelbvieh,hereford,limousin,simmental,Angus	rs110733805
6	block_145_chr_6	rs29026121	rs110517212	37778924	37933250	154326	0.03143	Production	37914437	37914441	QTL_ID=186145	trait=Average_daily_gain	Abbrev=ADG	breed=charolais,gelbvieh,hereford,limousin,simmental,Angus	rs452022110,rs443088095,rs381459681
6	block_145_chr_6	rs29026121	rs110517212	37778924	37933250	154326	0.03143	Production	37914437	37914441	QTL_ID=190037	trait=Metabolic_body_weight	Abbrev=MBW	breed=charolais,gelbvieh,hereford,limousin,simmental,Angus	rs207937185
6	block_145_chr_6	rs29026121	rs110517212	37778924	37933250	154326	0.03143	Production	37914511	37914515	QTL_ID=182193	trait=Dry_matter_intake	Abbrev=DMI	breed=charolais,gelbvieh,hereford,limousin,simmental,Angus	rs110253547
6	block_145_chr_6	rs29026121	rs110517212	37778924	37933250	154326	0.03143	Production	37914511	37914515	QTL_ID=186144	trait=Average_daily_gain	Abbrev=ADG	breed=charolais,gelbvieh,hereford,limousin,simmental,Angus	rs110788187
6	block_145_chr_6	rs29026121	rs110517212	37778924	37933250	154326	0.03143	Production	37914511	37914515	QTL_ID=190036	trait=Metabolic_body_weight	Abbrev=MBW	breed=charolais,gelbvieh,hereford,limousin,simmental,Angus	rs109163366
6	block_145_chr_6	rs29026121	rs110517212	37778924	37933250	154326	0.03143	Production	37914728	37914732	QTL_ID=182162	trait=Dry_matter_intake	Abbrev=DMI	breed=charolais,gelbvieh,hereford,limousin,simmental,Angus	rs41257255
6	block_145_chr_6	rs29026121	rs110517212	37778924	37933250	154326	0.03143	Production	37914728	37914732	QTL_ID=186143	trait=Average_daily_gain	Abbrev=ADG	breed=charolais,gelbvieh,hereford,limousin,simmental,Angus	rs110788187
6	block_145_chr_6	rs29026121	rs110517212	37778924	37933250	154326	0.03143	Production	37914728	37914732	QTL_ID=190035	trait=Metabolic_body_weight	Abbrev=MBW	breed=charolais,gelbvieh,hereford,limousin,simmental,Angus	rs29025709
6	block_145_chr_6	rs29026121	rs110517212	37778924	37933250	154326	0.03143	Production	37914814	37914818	QTL_ID=182156	trait=Dry_matter_intake	Abbrev=DMI	breed=charolais,gelbvieh,hereford,limousin,simmental,Angus	rs135724312
6	block_145_chr_6	rs29026121	rs110517212	37778924	37933250	154326	0.03143	Production	37914814	37914818	QTL_ID=186142	trait=Average_daily_gain	Abbrev=ADG	breed=charolais,gelbvieh,hereford,limousin,simmental,Angus	rs110788187
6	block_145_chr_6	rs29026121	rs110517212	37778924	37933250	154326	0.03143	Production	37914814	37914818	QTL_ID=190034	trait=Metabolic_body_weight	Abbrev=MBW	breed=charolais,gelbvieh,hereford,limousin,simmental,Angus	rs29025709
6	block_145_chr_6	rs29026121	rs110517212	37778924	37933250	154326	0.03143	Production	37914820	37914824	QTL_ID=182126	trait=Dry_matter_intake	Abbrev=DMI	breed=charolais,gelbvieh,hereford,limousin,simmental,Angus	rs135817111
6	block_145_chr_6	rs29026121	rs110517212	37778924	37933250	154326	0.03143	Production	37914820	37914824	QTL_ID=186141	trait=Average_daily_gain	Abbrev=ADG	breed=charolais,gelbvieh,hereford,limousin,simmental,Angus	rs110829720
6	block_145_chr_6	rs29026121	rs110517212	37778924	37933250	154326	0.03143	Production	37914820	37914824	QTL_ID=190033	trait=Metabolic_body_weight	Abbrev=MBW	breed=charolais,gelbvieh,hereford,limousin,simmental,Angus	rs29025709
6	block_145_chr_6	rs29026121	rs110517212	37778924	37933250	154326	0.03143	Production	37914830	37914834	QTL_ID=182174	trait=Dry_matter_intake	Abbrev=DMI	breed=charolais,gelbvieh,hereford,limousin,simmental,Angus	rs136655847
6	block_145_chr_6	rs29026121	rs110517212	37778924	37933250	154326	0.03143	Production	37914830	37914834	QTL_ID=186140	trait=Average_daily_gain	Abbrev=ADG	breed=charolais,gelbvieh,hereford,limousin,simmental,Angus	rs110829720
6	block_145_chr_6	rs29026121	rs110517212	37778924	37933250	154326	0.03143	Production	37914830	37914834	QTL_ID=190032	trait=Metabolic_body_weight	Abbrev=MBW	breed=charolais,gelbvieh,hereford,limousin,simmental,Angus	rs29025709
6	block_145_chr_6	rs29026121	rs110517212	37778924	37933250	154326	0.03143	Production	37915306	37915310	QTL_ID=182150	trait=Dry_matter_intake	Abbrev=DMI	breed=charolais,gelbvieh,hereford,limousin,simmental,Angus	rs133908481
6	block_145_chr_6	rs29026121	rs110517212	37778924	37933250	154326	0.03143	Production	37915306	37915310	QTL_ID=186138	trait=Average_daily_gain	Abbrev=ADG	breed=charolais,gelbvieh,hereford,limousin,simmental,Angus	rs110829720
6	block_145_chr_6	rs29026121	rs110517212	37778924	37933250	154326	0.03143	Production	37915306	37915310	QTL_ID=190030	trait=Metabolic_body_weight	Abbrev=MBW	breed=charolais,gelbvieh,hereford,limousin,simmental,Angus	rs29025709
6	block_145_chr_6	rs29026121	rs110517212	37778924	37933250	154326	0.03143	Production	37916174	37916178	QTL_ID=182062	trait=Dry_matter_intake	Abbrev=DMI	breed=charolais,gelbvieh,hereford,limousin,simmental,Angus	rs135604645
6	block_145_chr_6	rs29026121	rs110517212	37778924	37933250	154326	0.03143	Production	37916174	37916178	QTL_ID=184694	trait=Average_daily_gain	Abbrev=ADG	breed=charolais,gelbvieh,hereford,limousin,simmental,Angus	rs110057198
6	block_145_chr_6	rs29026121	rs110517212	37778924	37933250	154326	0.03143	Production	37916174	37916178	QTL_ID=187555	trait=Metabolic_body_weight	Abbrev=MBW	breed=charolais,gelbvieh,hereford,limousin,simmental,Angus	rs109279094
6	block_145_chr_6	rs29026121	rs110517212	37778924	37933250	154326	0.03143	Production	37916417	37916421	QTL_ID=187292	trait=Metabolic_body_weight	Abbrev=MBW	breed=charolais,gelbvieh,hereford,limousin,simmental,Angus	rs109555147
6	block_145_chr_6	rs29026121	rs110517212	37778924	37933250	154326	0.03143	Production	37917364	37917368	QTL_ID=182038	trait=Dry_matter_intake	Abbrev=DMI	breed=charolais,gelbvieh,hereford,limousin,simmental,Angus	rs109659817
6	block_145_chr_6	rs29026121	rs110517212	37778924	37933250	154326	0.03143	Production	37917364	37917368	QTL_ID=185726	trait=Average_daily_gain	Abbrev=ADG	breed=charolais,gelbvieh,hereford,limousin,simmental,Angus	rs133782327
6	block_145_chr_6	rs29026121	rs110517212	37778924	37933250	154326	0.03143	Production	37917364	37917368	QTL_ID=189254	trait=Metabolic_body_weight	Abbrev=MBW	breed=charolais,gelbvieh,hereford,limousin,simmental,Angus	rs137641775
6	block_145_chr_6	rs29026121	rs110517212	37778924	37933250	154326	0.03143	Production	37917419	37917423	QTL_ID=182072	trait=Dry_matter_intake	Abbrev=DMI	breed=charolais,gelbvieh,hereford,limousin,simmental,Angus	rs133070251
6	block_145_chr_6	rs29026121	rs110517212	37778924	37933250	154326	0.03143	Production	37917419	37917423	QTL_ID=184239	trait=Average_daily_gain	Abbrev=ADG	breed=charolais,gelbvieh,hereford,limousin,simmental,Angus	rs110908461
6	block_145_chr_6	rs29026121	rs110517212	37778924	37933250	154326	0.03143	Production	37917419	37917423	QTL_ID=186910	trait=Metabolic_body_weight	Abbrev=MBW	breed=charolais,gelbvieh,hereford,limousin,pinzgauer,red_angus,red_poll,simmental,Angus	rs110004749
6	block_145_chr_6	rs29026121	rs110517212	37778924	37933250	154326	0.03143	Production	37917794	37917798	QTL_ID=182077	trait=Dry_matter_intake	Abbrev=DMI	breed=charolais,gelbvieh,hereford,limousin,simmental,Angus	rs110919938
6	block_145_chr_6	rs29026121	rs110517212	37778924	37933250	154326	0.03143	Production	37917794	37917798	QTL_ID=184017	trait=Average_daily_gain	Abbrev=ADG	breed=charolais,gelbvieh,hereford,limousin,simmental,Angus	rs41567028
6	block_145_chr_6	rs29026121	rs110517212	37778924	37933250	154326	0.03143	Production	37917794	37917798	QTL_ID=186603	trait=Metabolic_body_weight	Abbrev=MBW	breed=charolais,gelbvieh,hereford,limousin,simmental,Angus	rs467849677
6	block_145_chr_6	rs29026121	rs110517212	37778924	37933250	154326	0.03143	Production	37918294	37918298	QTL_ID=182070	trait=Dry_matter_intake	Abbrev=DMI	breed=charolais,gelbvieh,hereford,limousin,simmental,Angus	rs136764992
6	block_145_chr_6	rs29026121	rs110517212	37778924	37933250	154326	0.03143	Production	37918294	37918298	QTL_ID=184662	trait=Average_daily_gain	Abbrev=ADG	breed=charolais,gelbvieh,hereford,limousin,simmental,Angus	rs110057198
6	block_145_chr_6	rs29026121	rs110517212	37778924	37933250	154326	0.03143	Production	37918294	37918298	QTL_ID=187519	trait=Metabolic_body_weight	Abbrev=MBW	breed=charolais,gelbvieh,hereford,limousin,simmental,Angus	rs135118455
6	block_145_chr_6	rs29026121	rs110517212	37778924	37933250	154326	0.03143	Production	37918544	37918548	QTL_ID=187309	trait=Metabolic_body_weight	Abbrev=MBW	breed=charolais,gelbvieh,hereford,limousin,simmental,Angus	rs109865366
6	block_145_chr_6	rs29026121	rs110517212	37778924	37933250	154326	0.03143	Production	37918822	37918826	QTL_ID=182086	trait=Dry_matter_intake	Abbrev=DMI	breed=charolais,gelbvieh,hereford,limousin,simmental,Angus	rs110865045
6	block_145_chr_6	rs29026121	rs110517212	37778924	37933250	154326	0.03143	Production	37918822	37918826	QTL_ID=184531	trait=Average_daily_gain	Abbrev=ADG	breed=charolais,gelbvieh,hereford,limousin,simmental,Angus	rs110057198
6	block_145_chr_6	rs29026121	rs110517212	37778924	37933250	154326	0.03143	Production	37918822	37918826	QTL_ID=187321	trait=Metabolic_body_weight	Abbrev=MBW	breed=charolais,gelbvieh,hereford,limousin,simmental,Angus	rs110550021
6	block_145_chr_6	rs29026121	rs110517212	37778924	37933250	154326	0.03143	Production	37919043	37919047	QTL_ID=182076	trait=Dry_matter_intake	Abbrev=DMI	breed=charolais,gelbvieh,hereford,limousin,simmental,Angus	rs136063910
6	block_145_chr_6	rs29026121	rs110517212	37778924	37933250	154326	0.03143	Production	37919043	37919047	QTL_ID=184330	trait=Average_daily_gain	Abbrev=ADG	breed=charolais,gelbvieh,hereford,limousin,simmental,Angus	rs473169717
6	block_145_chr_6	rs29026121	rs110517212	37778924	37933250	154326	0.03143	Production	37919043	37919047	QTL_ID=187021	trait=Metabolic_body_weight	Abbrev=MBW	breed=charolais,gelbvieh,hereford,limousin,simmental,Angus	rs136395713
6	block_145_chr_6	rs29026121	rs110517212	37778924	37933250	154326	0.03143	Production	37919093	37919097	QTL_ID=182081	trait=Dry_matter_intake	Abbrev=DMI	breed=charolais,gelbvieh,hereford,limousin,simmental,Angus	rs135994678
6	block_145_chr_6	rs29026121	rs110517212	37778924	37933250	154326	0.03143	Production	37919093	37919097	QTL_ID=184796	trait=Average_daily_gain	Abbrev=ADG	breed=charolais,gelbvieh,hereford,limousin,simmental,Angus	rs110057198
6	block_145_chr_6	rs29026121	rs110517212	37778924	37933250	154326	0.03143	Production	37919093	37919097	QTL_ID=187720	trait=Metabolic_body_weight	Abbrev=MBW	breed=charolais,gelbvieh,hereford,limousin,simmental,Angus	rs109374906
6	block_145_chr_6	rs29026121	rs110517212	37778924	37933250	154326	0.03143	Production	37919118	37919122	QTL_ID=182075	trait=Dry_matter_intake	Abbrev=DMI	breed=charolais,gelbvieh,hereford,limousin,simmental,Angus	rs109370642
6	block_145_chr_6	rs29026121	rs110517212	37778924	37933250	154326	0.03143	Production	37919118	37919122	QTL_ID=184715	trait=Average_daily_gain	Abbrev=ADG	breed=charolais,gelbvieh,hereford,limousin,simmental,Angus	rs110057198
6	block_145_chr_6	rs29026121	rs110517212	37778924	37933250	154326	0.03143	Production	37919118	37919122	QTL_ID=187592	trait=Metabolic_body_weight	Abbrev=MBW	breed=charolais,gelbvieh,hereford,limousin,simmental,Angus	rs110716794
6	block_145_chr_6	rs29026121	rs110517212	37778924	37933250	154326	0.03143	Production	37919518	37919522	QTL_ID=182037	trait=Dry_matter_intake	Abbrev=DMI	breed=charolais,gelbvieh,hereford,limousin,simmental,Angus	rs110182599
6	block_145_chr_6	rs29026121	rs110517212	37778924	37933250	154326	0.03143	Production	37919518	37919522	QTL_ID=184320	trait=Average_daily_gain	Abbrev=ADG	breed=charolais,gelbvieh,hereford,limousin,simmental,Angus	rs110908461
6	block_145_chr_6	rs29026121	rs110517212	37778924	37933250	154326	0.03143	Production	37919518	37919522	QTL_ID=187005	trait=Metabolic_body_weight	Abbrev=MBW	breed=charolais,gelbvieh,hereford,limousin,simmental,Angus	rs133697273
6	block_145_chr_6	rs29026121	rs110517212	37778924	37933250	154326	0.03143	Production	37919629	37919633	QTL_ID=182080	trait=Dry_matter_intake	Abbrev=DMI	breed=charolais,gelbvieh,hereford,limousin,simmental,Angus	rs109620302
6	block_145_chr_6	rs29026121	rs110517212	37778924	37933250	154326	0.03143	Production	37919629	37919633	QTL_ID=183972	trait=Average_daily_gain	Abbrev=ADG	breed=charolais,gelbvieh,hereford,limousin,simmental,Angus	rs41567028
6	block_145_chr_6	rs29026121	rs110517212	37778924	37933250	154326	0.03143	Production	37919629	37919633	QTL_ID=186541	trait=Metabolic_body_weight	Abbrev=MBW	breed=charolais,gelbvieh,hereford,limousin,simmental,Angus	rs42611265
6	block_145_chr_6	rs29026121	rs110517212	37778924	37933250	154326	0.03143	Production	37919659	37919663	QTL_ID=188720	trait=Metabolic_body_weight	Abbrev=MBW	breed=charolais,gelbvieh,hereford,limousin,simmental,Angus	rs137644845
6	block_145_chr_6	rs29026121	rs110517212	37778924	37933250	154326	0.03143	Production	37919851	37919855	QTL_ID=182024	trait=Dry_matter_intake	Abbrev=DMI	breed=charolais,gelbvieh,hereford,limousin,simmental,Angus	rs41652042
6	block_145_chr_6	rs29026121	rs110517212	37778924	37933250	154326	0.03143	Production	37919851	37919855	QTL_ID=185468	trait=Average_daily_gain	Abbrev=ADG	breed=charolais,gelbvieh,hereford,limousin,simmental,Angus	rs134663272
6	block_145_chr_6	rs29026121	rs110517212	37778924	37933250	154326	0.03143	Production	37919851	37919855	QTL_ID=188744	trait=Metabolic_body_weight	Abbrev=MBW	breed=charolais,gelbvieh,hereford,limousin,simmental,Angus	rs109134234
6	block_145_chr_6	rs29026121	rs110517212	37778924	37933250	154326	0.03143	Production	37919860	37919864	QTL_ID=182082	trait=Dry_matter_intake	Abbrev=DMI	breed=charolais,gelbvieh,hereford,limousin,simmental,Angus	rs41257255
6	block_145_chr_6	rs29026121	rs110517212	37778924	37933250	154326	0.03143	Production	37919860	37919864	QTL_ID=183942	trait=Average_daily_gain	Abbrev=ADG	breed=charolais,gelbvieh,hereford,limousin,simmental,Angus	rs41567028
6	block_145_chr_6	rs29026121	rs110517212	37778924	37933250	154326	0.03143	Production	37919860	37919864	QTL_ID=186481	trait=Metabolic_body_weight	Abbrev=MBW	breed=charolais,gelbvieh,hereford,limousin,simmental,Angus	rs133962079
6	block_145_chr_6	rs29026121	rs110517212	37778924	37933250	154326	0.03143	Production	37920303	37920307	QTL_ID=186568	trait=Metabolic_body_weight	Abbrev=MBW	breed=charolais,gelbvieh,hereford,limousin,simmental,Angus	rs137703542
6	block_145_chr_6	rs29026121	rs110517212	37778924	37933250	154326	0.03143	Production	37920536	37920540	QTL_ID=182083	trait=Dry_matter_intake	Abbrev=DMI	breed=charolais,gelbvieh,hereford,limousin,simmental,Angus	rs110278830
6	block_145_chr_6	rs29026121	rs110517212	37778924	37933250	154326	0.03143	Production	37920536	37920540	QTL_ID=184614	trait=Average_daily_gain	Abbrev=ADG	breed=charolais,gelbvieh,hereford,limousin,simmental,Angus	rs135839099
6	block_145_chr_6	rs29026121	rs110517212	37778924	37933250	154326	0.03143	Production	37920536	37920540	QTL_ID=187448	trait=Metabolic_body_weight	Abbrev=MBW	breed=charolais,gelbvieh,hereford,limousin,simmental,Angus	rs133389953
6	block_145_chr_6	rs29026121	rs110517212	37778924	37933250	154326	0.03143	Production	37920549	37920553	QTL_ID=182085	trait=Dry_matter_intake	Abbrev=DMI	breed=charolais,gelbvieh,hereford,limousin,simmental,Angus	rs135180328
6	block_145_chr_6	rs29026121	rs110517212	37778924	37933250	154326	0.03143	Production	37920549	37920553	QTL_ID=184747	trait=Average_daily_gain	Abbrev=ADG	breed=charolais,gelbvieh,hereford,limousin,simmental,Angus	rs110207706
6	block_145_chr_6	rs29026121	rs110517212	37778924	37933250	154326	0.03143	Production	37920549	37920553	QTL_ID=187642	trait=Metabolic_body_weight	Abbrev=MBW	breed=charolais,gelbvieh,hereford,limousin,simmental,Angus	rs109109118
6	block_145_chr_6	rs29026121	rs110517212	37778924	37933250	154326	0.03143	Production	37920664	37920668	QTL_ID=182089	trait=Dry_matter_intake	Abbrev=DMI	breed=charolais,gelbvieh,hereford,limousin,simmental,Angus	rs109892875
6	block_145_chr_6	rs29026121	rs110517212	37778924	37933250	154326	0.03143	Production	37920664	37920668	QTL_ID=184762	trait=Average_daily_gain	Abbrev=ADG	breed=charolais,gelbvieh,hereford,limousin,simmental,Angus	rs136213891
6	block_145_chr_6	rs29026121	rs110517212	37778924	37933250	154326	0.03143	Production	37920664	37920668	QTL_ID=187676	trait=Metabolic_body_weight	Abbrev=MBW	breed=charolais,gelbvieh,hereford,limousin,simmental,Angus	rs134717940
6	block_145_chr_6	rs29026121	rs110517212	37778924	37933250	154326	0.03143	Production	37921508	37921512	QTL_ID=182065	trait=Dry_matter_intake	Abbrev=DMI	breed=charolais,gelbvieh,hereford,limousin,simmental,Angus	rs136488569
6	block_145_chr_6	rs29026121	rs110517212	37778924	37933250	154326	0.03143	Production	37921508	37921512	QTL_ID=184182	trait=Average_daily_gain	Abbrev=ADG	breed=charolais,gelbvieh,hereford,limousin,simmental,Angus	rs136348029
6	block_145_chr_6	rs29026121	rs110517212	37778924	37933250	154326	0.03143	Production	37921508	37921512	QTL_ID=186839	trait=Metabolic_body_weight	Abbrev=MBW	breed=charolais,gelbvieh,hereford,limousin,simmental,Angus	rs109060163
6	block_145_chr_6	rs29026121	rs110517212	37778924	37933250	154326	0.03143	Production	37921601	37921605	QTL_ID=182294	trait=Dry_matter_intake	Abbrev=DMI	breed=charolais,gelbvieh,hereford,limousin,simmental,Angus	rs109428889
6	block_145_chr_6	rs29026121	rs110517212	37778924	37933250	154326	0.03143	Production	37921601	37921605	QTL_ID=185662	trait=Average_daily_gain	Abbrev=ADG	breed=charolais,gelbvieh,hereford,limousin,simmental,Angus	rs43012928
6	block_145_chr_6	rs29026121	rs110517212	37778924	37933250	154326	0.03143	Production	37921601	37921605	QTL_ID=189132	trait=Metabolic_body_weight	Abbrev=MBW	breed=charolais,gelbvieh,hereford,limousin,simmental,Angus	rs136491460
6	block_145_chr_6	rs29026121	rs110517212	37778924	37933250	154326	0.03143	Production	37921722	37921726	QTL_ID=182308	trait=Dry_matter_intake	Abbrev=DMI	breed=charolais,gelbvieh,hereford,limousin,simmental,Angus	rs208658687,rs135848932,rs134717940
6	block_145_chr_6	rs29026121	rs110517212	37778924	37933250	154326	0.03143	Production	37921722	37921726	QTL_ID=184812	trait=Average_daily_gain	Abbrev=ADG	breed=charolais,gelbvieh,hereford,limousin,simmental,Angus	rs210542037,rs381692987,rs384906759
6	block_145_chr_6	rs29026121	rs110517212	37778924	37933250	154326	0.03143	Production	37921722	37921726	QTL_ID=187747	trait=Metabolic_body_weight	Abbrev=MBW	breed=charolais,gelbvieh,hereford,limousin,simmental,Angus	rs133288259
6	block_145_chr_6	rs29026121	rs110517212	37778924	37933250	154326	0.03143	Production	37921897	37921901	QTL_ID=182297	trait=Dry_matter_intake	Abbrev=DMI	breed=charolais,gelbvieh,hereford,limousin,simmental,Angus	rs29017497
6	block_145_chr_6	rs29026121	rs110517212	37778924	37933250	154326	0.03143	Production	37921897	37921901	QTL_ID=185568	trait=Average_daily_gain	Abbrev=ADG	breed=charolais,gelbvieh,hereford,limousin,simmental,Angus	rs109978069
6	block_145_chr_6	rs29026121	rs110517212	37778924	37933250	154326	0.03143	Production	37921897	37921901	QTL_ID=188942	trait=Metabolic_body_weight	Abbrev=MBW	breed=charolais,gelbvieh,hereford,limousin,simmental,Angus	rs135967190
6	block_145_chr_6	rs29026121	rs110517212	37778924	37933250	154326	0.03143	Production	37922116	37922120	QTL_ID=182155	trait=Dry_matter_intake	Abbrev=DMI	breed=charolais,gelbvieh,hereford,limousin,simmental,Angus	rs110274064
6	block_145_chr_6	rs29026121	rs110517212	37778924	37933250	154326	0.03143	Production	37922116	37922120	QTL_ID=185939	trait=Average_daily_gain	Abbrev=ADG	breed=charolais,gelbvieh,hereford,limousin,simmental,Angus	rs134268855
6	block_145_chr_6	rs29026121	rs110517212	37778924	37933250	154326	0.03143	Production	37922116	37922120	QTL_ID=189600	trait=Metabolic_body_weight	Abbrev=MBW	breed=charolais,gelbvieh,hereford,limousin,simmental,Angus	rs134320554
6	block_145_chr_6	rs29026121	rs110517212	37778924	37933250	154326	0.03143	Production	37924936	37924940	QTL_ID=182149	trait=Dry_matter_intake	Abbrev=DMI	breed=charolais,gelbvieh,hereford,limousin,simmental,Angus	rs109983825
6	block_145_chr_6	rs29026121	rs110517212	37778924	37933250	154326	0.03143	Production	37924936	37924940	QTL_ID=184504	trait=Average_daily_gain	Abbrev=ADG	breed=charolais,gelbvieh,hereford,limousin,simmental,Angus	rs134544693
6	block_145_chr_6	rs29026121	rs110517212	37778924	37933250	154326	0.03143	Production	37924936	37924940	QTL_ID=187279	trait=Metabolic_body_weight	Abbrev=MBW	breed=charolais,gelbvieh,hereford,limousin,simmental,Angus	rs133531230
6	block_145_chr_6	rs29026121	rs110517212	37778924	37933250	154326	0.03143	Production	37925657	37925661	QTL_ID=182026	trait=Dry_matter_intake	Abbrev=DMI	breed=charolais,gelbvieh,hereford,limousin,simmental,Angus	rs134313251
6	block_145_chr_6	rs29026121	rs110517212	37778924	37933250	154326	0.03143	Production	37925657	37925661	QTL_ID=184410	trait=Average_daily_gain	Abbrev=ADG	breed=charolais,gelbvieh,hereford,limousin,simmental,Angus	rs136858002
6	block_145_chr_6	rs29026121	rs110517212	37778924	37933250	154326	0.03143	Production	37925657	37925661	QTL_ID=187131	trait=Metabolic_body_weight	Abbrev=MBW	breed=charolais,gelbvieh,hereford,limousin,simmental,Angus	rs135012495
6	block_145_chr_6	rs29026121	rs110517212	37778924	37933250	154326	0.03143	Production	37926598	37926602	QTL_ID=182025	trait=Dry_matter_intake	Abbrev=DMI	breed=charolais,gelbvieh,hereford,limousin,simmental,Angus	rs135180328
6	block_145_chr_6	rs29026121	rs110517212	37778924	37933250	154326	0.03143	Production	37926598	37926602	QTL_ID=184288	trait=Average_daily_gain	Abbrev=ADG	breed=charolais,gelbvieh,hereford,limousin,simmental,Angus	rs137273857
6	block_145_chr_6	rs29026121	rs110517212	37778924	37933250	154326	0.03143	Production	37926598	37926602	QTL_ID=186969	trait=Metabolic_body_weight	Abbrev=MBW	breed=charolais,gelbvieh,hereford,limousin,simmental,Angus	rs109737986
6	block_145_chr_6	rs29026121	rs110517212	37778924	37933250	154326	0.03143	Production	37926958	37926962	QTL_ID=182141	trait=Dry_matter_intake	Abbrev=DMI	breed=charolais,gelbvieh,hereford,limousin,simmental,Angus	rs109754617
6	block_145_chr_6	rs29026121	rs110517212	37778924	37933250	154326	0.03143	Production	37926958	37926962	QTL_ID=184664	trait=Average_daily_gain	Abbrev=ADG	breed=charolais,gelbvieh,hereford,limousin,simmental,Angus	rs136855353
6	block_145_chr_6	rs29026121	rs110517212	37778924	37933250	154326	0.03143	Production	37926958	37926962	QTL_ID=187522	trait=Metabolic_body_weight	Abbrev=MBW	breed=charolais,gelbvieh,hereford,limousin,simmental,Angus	rs109186912
6	block_145_chr_6	rs29026121	rs110517212	37778924	37933250	154326	0.03143	Production	37928154	37928158	QTL_ID=182142	trait=Dry_matter_intake	Abbrev=DMI	breed=charolais,gelbvieh,hereford,limousin,simmental,Angus	rs136917116
6	block_145_chr_6	rs29026121	rs110517212	37778924	37933250	154326	0.03143	Production	37928154	37928158	QTL_ID=184324	trait=Average_daily_gain	Abbrev=ADG	breed=charolais,gelbvieh,hereford,limousin,simmental,Angus	rs43702490
6	block_145_chr_6	rs29026121	rs110517212	37778924	37933250	154326	0.03143	Production	37928154	37928158	QTL_ID=187013	trait=Metabolic_body_weight	Abbrev=MBW	breed=charolais,gelbvieh,hereford,limousin,simmental,Angus	rs137646763
6	block_145_chr_6	rs29026121	rs110517212	37778924	37933250	154326	0.03143	Production	37928477	37928481	QTL_ID=182200	trait=Dry_matter_intake	Abbrev=DMI	breed=charolais,gelbvieh,hereford,limousin,simmental,Angus	rs136704637
6	block_145_chr_6	rs29026121	rs110517212	37778924	37933250	154326	0.03143	Production	37928477	37928481	QTL_ID=184135	trait=Average_daily_gain	Abbrev=ADG	breed=charolais,gelbvieh,hereford,limousin,simmental,Angus	rs109203961
6	block_145_chr_6	rs29026121	rs110517212	37778924	37933250	154326	0.03143	Production	37928477	37928481	QTL_ID=186767	trait=Metabolic_body_weight	Abbrev=MBW	breed=charolais,gelbvieh,hereford,limousin,simmental,Angus	rs109969756
6	block_145_chr_6	rs29026121	rs110517212	37778924	37933250	154326	0.03143	Production	37929063	37929067	QTL_ID=186795	trait=Metabolic_body_weight	Abbrev=MBW	breed=charolais,gelbvieh,hereford,limousin,simmental,Angus	rs41652043
6	block_145_chr_6	rs29026121	rs110517212	37778924	37933250	154326	0.03143	Production	37929102	37929106	QTL_ID=188703	trait=Metabolic_body_weight	Abbrev=MBW	breed=charolais,gelbvieh,hereford,limousin,simmental,Angus	rs137827482
6	block_145_chr_6	rs29026121	rs110517212	37778924	37933250	154326	0.03143	Production	37929182	37929186	QTL_ID=186714	trait=Metabolic_body_weight	Abbrev=MBW	breed=charolais,gelbvieh,hereford,limousin,simmental,Angus	rs41595996,rs41571497
6	block_145_chr_6	rs29026121	rs110517212	37778924	37933250	154326	0.03143	Production	37929687	37929691	QTL_ID=187553	trait=Metabolic_body_weight	Abbrev=MBW	breed=charolais,gelbvieh,hereford,limousin,simmental,Angus	rs41652043
6	block_145_chr_6	rs29026121	rs110517212	37778924	37933250	154326	0.03143	Production	37929784	37929788	QTL_ID=182201	trait=Dry_matter_intake	Abbrev=DMI	breed=charolais,gelbvieh,hereford,limousin,simmental,Angus	rs136863997
6	block_145_chr_6	rs29026121	rs110517212	37778924	37933250	154326	0.03143	Production	37929784	37929788	QTL_ID=185694	trait=Average_daily_gain	Abbrev=ADG	breed=charolais,gelbvieh,hereford,limousin,simmental,Angus	rs42520810
6	block_145_chr_6	rs29026121	rs110517212	37778924	37933250	154326	0.03143	Production	37929784	37929788	QTL_ID=189189	trait=Metabolic_body_weight	Abbrev=MBW	breed=charolais,gelbvieh,hereford,limousin,simmental,Angus	rs110829720
6	block_145_chr_6	rs29026121	rs110517212	37778924	37933250	154326	0.03143	Production	37930044	37930048	QTL_ID=182346	trait=Dry_matter_intake	Abbrev=DMI	breed=charolais,gelbvieh,hereford,limousin,simmental,Angus	rs136067607
6	block_145_chr_6	rs29026121	rs110517212	37778924	37933250	154326	0.03143	Production	37930044	37930048	QTL_ID=184156	trait=Average_daily_gain	Abbrev=ADG	breed=charolais,gelbvieh,hereford,limousin,simmental,Angus	rs43131320
6	block_145_chr_6	rs29026121	rs110517212	37778924	37933250	154326	0.03143	Production	37930044	37930048	QTL_ID=186799	trait=Metabolic_body_weight	Abbrev=MBW	breed=charolais,gelbvieh,hereford,limousin,simmental,Angus	rs41652043
6	block_145_chr_6	rs29026121	rs110517212	37778924	37933250	154326	0.03143	Production	37930291	37930295	QTL_ID=182114	trait=Dry_matter_intake	Abbrev=DMI	breed=charolais,chianina,gelbvieh,hereford,holstein,limousin,piedmontese,red_angus,simmental,Angus,Maine-Anjou	rs137101833
6	block_145_chr_6	rs29026121	rs110517212	37778924	37933250	154326	0.03143	Production	37930291	37930295	QTL_ID=185651	trait=Average_daily_gain	Abbrev=ADG	breed=charolais,gelbvieh,hereford,limousin,simmental,Angus	rs42520810
6	block_145_chr_6	rs29026121	rs110517212	37778924	37933250	154326	0.03143	Production	37930291	37930295	QTL_ID=189112	trait=Metabolic_body_weight	Abbrev=MBW	breed=charolais,gelbvieh,hereford,limousin,simmental,Angus	rs109808198
6	block_145_chr_6	rs29026121	rs110517212	37778924	37933250	154326	0.03143	Production	37930670	37930674	QTL_ID=182143	trait=Dry_matter_intake	Abbrev=DMI	breed=charolais,gelbvieh,hereford,limousin,simmental,Angus	rs134702380
6	block_145_chr_6	rs29026121	rs110517212	37778924	37933250	154326	0.03143	Production	37930670	37930674	QTL_ID=184481	trait=Average_daily_gain	Abbrev=ADG	breed=charolais,gelbvieh,hereford,limousin,simmental,Angus	rs43077863
6	block_145_chr_6	rs29026121	rs110517212	37778924	37933250	154326	0.03143	Production	37930670	37930674	QTL_ID=187242	trait=Metabolic_body_weight	Abbrev=MBW	breed=charolais,gelbvieh,hereford,limousin,simmental,Angus	DIK1054,DIK082
6	block_145_chr_6	rs29026121	rs110517212	37778924	37933250	154326	0.03143	Production	37930779	37930783	QTL_ID=187206	trait=Metabolic_body_weight	Abbrev=MBW	breed=charolais,gelbvieh,hereford,limousin,simmental,Angus	rs110829720
6	block_145_chr_6	rs29026121	rs110517212	37778924	37933250	154326	0.03143	Production	37930866	37930870	QTL_ID=182148	trait=Dry_matter_intake	Abbrev=DMI	breed=charolais,gelbvieh,hereford,limousin,simmental,Angus	rs136223480
6	block_145_chr_6	rs29026121	rs110517212	37778924	37933250	154326	0.03143	Production	37930866	37930870	QTL_ID=186056	trait=Average_daily_gain	Abbrev=ADG	breed=charolais,gelbvieh,hereford,limousin,simmental,Angus	rs43465963
6	block_145_chr_6	rs29026121	rs110517212	37778924	37933250	154326	0.03143	Production	37930866	37930870	QTL_ID=189809	trait=Metabolic_body_weight	Abbrev=MBW	breed=charolais,gelbvieh,hereford,limousin,simmental,Angus	rs41652051
6	block_145_chr_6	rs29026121	rs110517212	37778924	37933250	154326	0.03143	Production	37930887	37930891	QTL_ID=182134	trait=Dry_matter_intake	Abbrev=DMI	breed=charolais,chianina,gelbvieh,hereford,holstein,limousin,piedmontese,red_angus,simmental,Angus,Maine-Anjou	rs134345838
6	block_145_chr_6	rs29026121	rs110517212	37778924	37933250	154326	0.03143	Production	37930887	37930891	QTL_ID=185812	trait=Average_daily_gain	Abbrev=ADG	breed=charolais,gelbvieh,hereford,limousin,simmental,Angus	rs133728493,rs110948516,rs136046969
6	block_145_chr_6	rs29026121	rs110517212	37778924	37933250	154326	0.03143	Production	37930887	37930891	QTL_ID=189397	trait=Metabolic_body_weight	Abbrev=MBW	breed=charolais,gelbvieh,hereford,limousin,simmental,Angus	rs378850759
6	block_145_chr_6	rs29026121	rs110517212	37778924	37933250	154326	0.03143	Production	37931087	37931091	QTL_ID=182137	trait=Dry_matter_intake	Abbrev=DMI	breed=charolais,gelbvieh,hereford,limousin,simmental,Angus	rs135337162
6	block_145_chr_6	rs29026121	rs110517212	37778924	37933250	154326	0.03143	Production	37931087	37931091	QTL_ID=184062	trait=Average_daily_gain	Abbrev=ADG	breed=charolais,gelbvieh,hereford,limousin,simmental,Angus	rs29010402,rs110025991
6	block_145_chr_6	rs29026121	rs110517212	37778924	37933250	154326	0.03143	Production	37931087	37931091	QTL_ID=186660	trait=Metabolic_body_weight	Abbrev=MBW	breed=charolais,gelbvieh,hereford,limousin,simmental,Angus	rs42806106,rs43106284,rs110025991
6	block_145_chr_6	rs29026121	rs110517212	37778924	37933250	154326	0.03143	Production	37931214	37931218	QTL_ID=182147	trait=Dry_matter_intake	Abbrev=DMI	breed=charolais,gelbvieh,hereford,limousin,simmental,Angus	rs137277371
6	block_145_chr_6	rs29026121	rs110517212	37778924	37933250	154326	0.03143	Production	37931214	37931218	QTL_ID=184623	trait=Average_daily_gain	Abbrev=ADG	breed=charolais,gelbvieh,hereford,limousin,simmental,Angus	rs43106284
6	block_145_chr_6	rs29026121	rs110517212	37778924	37933250	154326	0.03143	Production	37931214	37931218	QTL_ID=187461	trait=Metabolic_body_weight	Abbrev=MBW	breed=charolais,gelbvieh,hereford,limousin,simmental,Angus	rs110181927
6	block_145_chr_6	rs29026121	rs110517212	37778924	37933250	154326	0.03143	Production	37931296	37931300	QTL_ID=182144	trait=Dry_matter_intake	Abbrev=DMI	breed=charolais,gelbvieh,hereford,limousin,simmental,Angus	rs137675735
6	block_145_chr_6	rs29026121	rs110517212	37778924	37933250	154326	0.03143	Production	37931296	37931300	QTL_ID=185521	trait=Average_daily_gain	Abbrev=ADG	breed=charolais,gelbvieh,hereford,limousin,simmental,Angus	rs42520810
6	block_145_chr_6	rs29026121	rs110517212	37778924	37933250	154326	0.03143	Production	37931296	37931300	QTL_ID=188847	trait=Metabolic_body_weight	Abbrev=MBW	breed=charolais,gelbvieh,hereford,limousin,simmental,Angus	BMS382,BMS1242
6	block_145_chr_6	rs29026121	rs110517212	37778924	37933250	154326	0.03143	Production	37931619	37931623	QTL_ID=182202	trait=Dry_matter_intake	Abbrev=DMI	breed=charolais,gelbvieh,hereford,limousin,simmental,Angus	rs134811970
6	block_145_chr_6	rs29026121	rs110517212	37778924	37933250	154326	0.03143	Production	37931619	37931623	QTL_ID=183925	trait=Average_daily_gain	Abbrev=ADG	breed=charolais,gelbvieh,hereford,limousin,simmental,Angus	rs42956336
6	block_145_chr_6	rs29026121	rs110517212	37778924	37933250	154326	0.03143	Production	37931619	37931623	QTL_ID=186458	trait=Metabolic_body_weight	Abbrev=MBW	breed=charolais,gelbvieh,hereford,limousin,simmental,Angus	rs43467306
6	block_145_chr_6	rs29026121	rs110517212	37778924	37933250	154326	0.03143	Production	37931686	37931690	QTL_ID=182203	trait=Dry_matter_intake	Abbrev=DMI	breed=charolais,gelbvieh,hereford,limousin,simmental,Angus	rs137525945
6	block_145_chr_6	rs29026121	rs110517212	37778924	37933250	154326	0.03143	Production	37931686	37931690	QTL_ID=184637	trait=Average_daily_gain	Abbrev=ADG	breed=charolais,gelbvieh,hereford,limousin,simmental,Angus	rs42506221
6	block_145_chr_6	rs29026121	rs110517212	37778924	37933250	154326	0.03143	Production	37931686	37931690	QTL_ID=187484	trait=Metabolic_body_weight	Abbrev=MBW	breed=charolais,gelbvieh,hereford,limousin,simmental,Angus	rs133531230,rs135142556
6	block_145_chr_6	rs29026121	rs110517212	37778924	37933250	154326	0.03143	Production	37931724	37931728	QTL_ID=182204	trait=Dry_matter_intake	Abbrev=DMI	breed=charolais,gelbvieh,hereford,limousin,simmental,Angus	rs41652062
6	block_145_chr_6	rs29026121	rs110517212	37778924	37933250	154326	0.03143	Production	37931724	37931728	QTL_ID=184198	trait=Average_daily_gain	Abbrev=ADG	breed=charolais,gelbvieh,hereford,limousin,simmental,Angus	rs135570578
6	block_145_chr_6	rs29026121	rs110517212	37778924	37933250	154326	0.03143	Production	37931724	37931728	QTL_ID=186864	trait=Metabolic_body_weight	Abbrev=MBW	breed=charolais,gelbvieh,hereford,limousin,simmental,Angus	rs41631245
6	block_145_chr_6	rs29026121	rs110517212	37778924	37933250	154326	0.03143	Production	37931901	37931905	QTL_ID=186543	trait=Metabolic_body_weight	Abbrev=MBW	breed=charolais,gelbvieh,hereford,limousin,simmental,Angus	rs43467254
6	block_145_chr_6	rs29026121	rs110517212	37778924	37933250	154326	0.03143	Production	37932168	37932172	QTL_ID=182197	trait=Dry_matter_intake	Abbrev=DMI	breed=charolais,gelbvieh,hereford,limousin,simmental,Angus	rs132766334
6	block_145_chr_6	rs29026121	rs110517212	37778924	37933250	154326	0.03143	Production	37932168	37932172	QTL_ID=185912	trait=Average_daily_gain	Abbrev=ADG	breed=charolais,gelbvieh,hereford,limousin,simmental,Angus	rs133682920
6	block_145_chr_6	rs29026121	rs110517212	37778924	37933250	154326	0.03143	Production	37932168	37932172	QTL_ID=189547	trait=Metabolic_body_weight	Abbrev=MBW	breed=charolais,gelbvieh,hereford,limousin,simmental,Angus	rs41652051
6	block_145_chr_6	rs29026121	rs110517212	37778924	37933250	154326	0.03143	Production	37932195	37932199	QTL_ID=182205	trait=Dry_matter_intake	Abbrev=DMI	breed=charolais,gelbvieh,hereford,limousin,simmental,Angus	rs133377535
6	block_145_chr_6	rs29026121	rs110517212	37778924	37933250	154326	0.03143	Production	37932195	37932199	QTL_ID=184666	trait=Average_daily_gain	Abbrev=ADG	breed=charolais,gelbvieh,hereford,limousin,simmental,Angus	rs136367188
6	block_145_chr_6	rs29026121	rs110517212	37778924	37933250	154326	0.03143	Production	37932195	37932199	QTL_ID=187524	trait=Metabolic_body_weight	Abbrev=MBW	breed=charolais,gelbvieh,hereford,limousin,simmental,Angus	rs133321579
6	block_145_chr_6	rs29026121	rs110517212	37778924	37933250	154326	0.03143	Production	37932369	37932373	QTL_ID=182180	trait=Dry_matter_intake	Abbrev=DMI	breed=charolais,gelbvieh,hereford,limousin,simmental,Angus	rs135229330
6	block_145_chr_6	rs29026121	rs110517212	37778924	37933250	154326	0.03143	Production	37932369	37932373	QTL_ID=185904	trait=Average_daily_gain	Abbrev=ADG	breed=charolais,gelbvieh,hereford,limousin,simmental,Angus	rs43464811
6	block_145_chr_6	rs29026121	rs110517212	37778924	37933250	154326	0.03143	Production	37932369	37932373	QTL_ID=189535	trait=Metabolic_body_weight	Abbrev=MBW	breed=charolais,gelbvieh,hereford,limousin,simmental,Angus	rs41652051
6	block_145_chr_6	rs29026121	rs110517212	37778924	37933250	154326	0.03143	Production	37932375	37932379	QTL_ID=182199	trait=Dry_matter_intake	Abbrev=DMI	breed=charolais,gelbvieh,hereford,limousin,simmental,Angus	rs132718072
6	block_145_chr_6	rs29026121	rs110517212	37778924	37933250	154326	0.03143	Production	37932375	37932379	QTL_ID=184297	trait=Average_daily_gain	Abbrev=ADG	breed=charolais,gelbvieh,hereford,limousin,simmental,Angus	rs43461550
6	block_145_chr_6	rs29026121	rs110517212	37778924	37933250	154326	0.03143	Production	37932375	37932379	QTL_ID=186977	trait=Metabolic_body_weight	Abbrev=MBW	breed=holstein	BM3026
6	block_145_chr_6	rs29026121	rs110517212	37778924	37933250	154326	0.03143	Production	37932410	37932414	QTL_ID=182166	trait=Dry_matter_intake	Abbrev=DMI	breed=charolais,gelbvieh,hereford,limousin,simmental,Angus	rs134029947
6	block_145_chr_6	rs29026121	rs110517212	37778924	37933250	154326	0.03143	Production	37932410	37932414	QTL_ID=184611	trait=Average_daily_gain	Abbrev=ADG	breed=charolais,gelbvieh,hereford,limousin,simmental,Angus	rs43106284
6	block_145_chr_6	rs29026121	rs110517212	37778924	37933250	154326	0.03143	Production	37932410	37932414	QTL_ID=187443	trait=Metabolic_body_weight	Abbrev=MBW	breed=charolais,gelbvieh,hereford,limousin,simmental,Angus	BM1329,BM143
6	block_145_chr_6	rs29026121	rs110517212	37778924	37933250	154326	0.03143	Production	37932432	37932436	QTL_ID=182181	trait=Dry_matter_intake	Abbrev=DMI	breed=charolais,gelbvieh,hereford,limousin,simmental,Angus	rs136709130
6	block_145_chr_6	rs29026121	rs110517212	37778924	37933250	154326	0.03143	Production	37932432	37932436	QTL_ID=184066	trait=Average_daily_gain	Abbrev=ADG	breed=charolais,gelbvieh,hereford,limousin,simmental,Angus	rs43464811
6	block_145_chr_6	rs29026121	rs110517212	37778924	37933250	154326	0.03143	Production	37932432	37932436	QTL_ID=186666	trait=Metabolic_body_weight	Abbrev=MBW	breed=charolais,gelbvieh,hereford,limousin,simmental,Angus	rs41595996,rs41571497
6	block_145_chr_6	rs29026121	rs110517212	37778924	37933250	154326	0.03143	Production	37932561	37932565	QTL_ID=182138	trait=Dry_matter_intake	Abbrev=DMI	breed=charolais,gelbvieh,hereford,limousin,simmental,Angus	rs133226530
6	block_145_chr_6	rs29026121	rs110517212	37778924	37933250	154326	0.03143	Production	37932561	37932565	QTL_ID=184250	trait=Average_daily_gain	Abbrev=ADG	breed=charolais,gelbvieh,hereford,limousin,simmental,Angus	rs43461535
6	block_145_chr_6	rs29026121	rs110517212	37778924	37933250	154326	0.03143	Production	37932561	37932565	QTL_ID=186927	trait=Metabolic_body_weight	Abbrev=MBW	breed=charolais,gelbvieh,hereford,limousin,simmental,Angus	rs385226283
6	block_145_chr_6	rs29026121	rs110517212	37778924	37933250	154326	0.03143	Production	37932770	37932774	QTL_ID=182145	trait=Dry_matter_intake	Abbrev=DMI	breed=charolais,gelbvieh,hereford,limousin,simmental,Angus	rs133195861
6	block_145_chr_6	rs29026121	rs110517212	37778924	37933250	154326	0.03143	Production	37932770	37932774	QTL_ID=184594	trait=Average_daily_gain	Abbrev=ADG	breed=charolais,gelbvieh,hereford,limousin,simmental,Angus	rs41611194
6	block_145_chr_6	rs29026121	rs110517212	37778924	37933250	154326	0.03143	Production	37932770	37932774	QTL_ID=187413	trait=Metabolic_body_weight	Abbrev=MBW	breed=charolais,gelbvieh,hereford,limousin,simmental,Angus	BM1329,BM143
6	block_145_chr_6	rs29026121	rs110517212	37778924	37933250	154326	0.03143	Production	37932776	37932780	QTL_ID=182207	trait=Dry_matter_intake	Abbrev=DMI	breed=charolais,gelbvieh,hereford,limousin,simmental,Angus	rs135304654
6	block_145_chr_6	rs29026121	rs110517212	37778924	37933250	154326	0.03143	Production	37932776	37932780	QTL_ID=183892	trait=Average_daily_gain	Abbrev=ADG	breed=charolais,gelbvieh,hereford,limousin,simmental,Angus	rs110566283
6	block_145_chr_6	rs29026121	rs110517212	37778924	37933250	154326	0.03143	Production	37932776	37932780	QTL_ID=186414	trait=Metabolic_body_weight	Abbrev=MBW	breed=charolais,gelbvieh,hereford,limousin,simmental,Angus	rs133317032
6	block_145_chr_6	rs29026121	rs110517212	37778924	37933250	154326	0.03143	Production	37932958	37932962	QTL_ID=182208	trait=Dry_matter_intake	Abbrev=DMI	breed=charolais,gelbvieh,hereford,limousin,simmental,Angus	rs136532740
6	block_145_chr_6	rs29026121	rs110517212	37778924	37933250	154326	0.03143	Production	37932958	37932962	QTL_ID=185631	trait=Average_daily_gain	Abbrev=ADG	breed=charolais,gelbvieh,hereford,limousin,simmental,Angus	rs42520810
6	block_145_chr_6	rs29026121	rs110517212	37778924	37933250	154326	0.03143	Production	37932958	37932962	QTL_ID=189082	trait=Metabolic_body_weight	Abbrev=MBW	breed=charolais,gelbvieh,hereford,limousin,simmental,Angus	rs110965859
6	block_145_chr_6	rs29026121	rs110517212	37778924	37933250	154326	0.03143	Production	37933248	37933252	QTL_ID=164083	trait=Body_weight_(birth)	Abbrev=BW	breed=charolais,gelbvieh,hereford,limousin,simmental,Angus	rs133871409
6	block_145_chr_6	rs29026121	rs110517212	37778924	37933250	154326	0.03143	Production	37933248	37933252	QTL_ID=164384	trait=Body_weight_(birth)	Abbrev=BW	breed=charolais,gelbvieh,hereford,limousin,simmental,Angus	rs133871409
6	block_145_chr_6	rs29026121	rs110517212	37778924	37933250	154326	0.03143	Production	37933248	37933252	QTL_ID=164427	trait=Body_weight_(weaning)	Abbrev=WWT	breed=charolais,gelbvieh,hereford,limousin,simmental,Angus	rs42756089
6	block_145_chr_6	rs29026121	rs110517212	37778924	37933250	154326	0.03143	Production	37933248	37933252	QTL_ID=164502	trait=Body_weight_(yearling)	Abbrev=W365	breed=charolais,gelbvieh,hereford,limousin,simmental,Angus	rs42756089
6	block_145_chr_6	rs29026121	rs110517212	37778924	37933250	154326	0.03143	Production	37933248	37933252	QTL_ID=187407	trait=Metabolic_body_weight	Abbrev=MBW	breed=charolais,gelbvieh,hereford,limousin,simmental,Angus	rs43706861
6	block_145_chr_6	rs29026121	rs110517212	37778924	37933250	154326	0.03143	Production	37933248	37933252	QTL_ID=66411	trait=Body_weight_(birth)	Abbrev=BW	breed=jersey	rs110260594
6	block_145_chr_6	rs29026121	rs110517212	37778924	37933250	154326	0.03143	Production	37933248	37933252	QTL_ID=66412	trait=Body_weight_(weaning)	Abbrev=WWT	breed=jersey	rs110260594
6	block_145_chr_6	rs29026121	rs110517212	37778924	37933250	154326	0.03143	Production	37933248	37933252	QTL_ID=66413	trait=Body_weight_(yearling)	Abbrev=W365	breed=jersey	rs109590458
6	block_145_chr_6	rs29026121	rs110517212	37778924	37933250	154326	0.03143	Production	37933248	37933252	QTL_ID=66414	trait=Body_weight_gain	Abbrev=BWG	breed=jersey	rs109590458
6	block_145_chr_6	rs29026121	rs110517212	37778924	37933250	154326	0.03143	Production	37933248	37933252	QTL_ID=66415	trait=Body_weight_gain	Abbrev=BWG	breed=jersey	rs109590458
6	block_145_chr_6	rs29026121	rs110517212	37778924	37933250	154326	0.03143	Production	37933248	37933252	QTL_ID=66416	trait=Body_weight_gain	Abbrev=BWG	breed=jersey	rs109576832
6	block_145_chr_6	rs29026121	rs110517212	37778924	37933250	154326	0.03143	Reproduction	37817587	37817591	QTL_ID=25205	trait=Calving_ease	Abbrev=CALEASE	breed=jersey	rs109159923
6	block_145_chr_6	rs29026121	rs110517212	37778924	37933250	154326	0.03143	Reproduction	37908476	37908480	QTL_ID=25206	trait=Calving_ease	Abbrev=CALEASE	breed=limousin	rs133242881
6	block_171_chr_6	rs42591343	rs207900061	41708129	41764522	56393	0.03383	Milk	41708127	41708131	QTL_ID=137814	trait=Milk_protein_percentage	Abbrev=PP	breed=holstein	rs43009638
6	block_171_chr_6	rs42591343	rs207900061	41708129	41764522	56393	0.03383	Milk	41708127	41708131	QTL_ID=138201	trait=Milk_fat_percentage	Abbrev=FP	breed=holstein	rs136915328
6	block_171_chr_6	rs42591343	rs207900061	41708129	41764522	56393	0.03383	Milk	41754013	41754017	QTL_ID=137785	trait=Milk_protein_percentage	Abbrev=PP	breed=holstein	rs110050838
6	block_171_chr_6	rs42591343	rs207900061	41708129	41764522	56393	0.03383	Milk	41754013	41754017	QTL_ID=138167	trait=Milk_fat_percentage	Abbrev=FP	breed=holstein	rs136915328
6	block_171_chr_6	rs42591343	rs207900061	41708129	41764522	56393	0.03383	Milk	41756381	41756385	QTL_ID=70418	trait=Milk_potassium_content	Abbrev=MK	breed=holstein	rs135549602
6	block_173_chr_6	rs110435700	rs41983246	42004652	42037316	32664	0.02994	Production	42004650	42004654	QTL_ID=66409	trait=Body_weight_(birth)	Abbrev=BW	breed=holstein	rs42960669
6	block_173_chr_6	rs110435700	rs41983246	42004652	42037316	32664	0.02994	Production	42004650	42004654	QTL_ID=66410	trait=Body_weight_gain	Abbrev=BWG	breed=holstein	rs41623376
6	block_173_chr_6	rs110435700	rs41983246	42004652	42037316	32664	0.02994	Production	42004650	42004654	QTL_ID=67333	trait=Body_weight_(weaning)	Abbrev=WWT	breed=holstein	rs42960636
6	block_173_chr_6	rs110435700	rs41983246	42004652	42037316	32664	0.02994	Production	42004650	42004654	QTL_ID=67334	trait=Body_weight_(yearling)	Abbrev=W365	breed=holstein	rs41623376
6	block_173_chr_6	rs110435700	rs41983246	42004652	42037316	32664	0.02994	Production	42037314	42037318	QTL_ID=66548	trait=Body_weight_(birth)	Abbrev=BW	breed=holstein	rs42960639
6	block_173_chr_6	rs110435700	rs41983246	42004652	42037316	32664	0.02994	Production	42037314	42037318	QTL_ID=67648	trait=Body_weight_(weaning)	Abbrev=WWT	breed=holstein	CSN1S1
6	block_173_chr_6	rs110435700	rs41983246	42004652	42037316	32664	0.02994	Production	42037314	42037318	QTL_ID=67649	trait=Body_weight_(yearling)	Abbrev=W365	breed=holstein	BMS360,CSNA,CSNA
6	block_173_chr_6	rs110435700	rs41983246	42004652	42037316	32664	0.02994	Production	42037314	42037318	QTL_ID=67650	trait=Body_weight_gain	Abbrev=BWG	breed=holstein	rs42960639
6	block_190_chr_6	rs109134234	rs41652042	45135036	45156602	21566	0.05278	Production	45135034	45135038	QTL_ID=67176	trait=Body_weight_(birth)	Abbrev=BW	breed=holstein	rs110694171
6	block_190_chr_6	rs109134234	rs41652042	45135036	45156602	21566	0.05278	Production	45135034	45135038	QTL_ID=67177	trait=Body_weight_(yearling)	Abbrev=W365	breed=holstein	rs110855129
6	block_190_chr_6	rs109134234	rs41652042	45135036	45156602	21566	0.05278	Production	45135034	45135038	QTL_ID=67178	trait=Body_weight_gain	Abbrev=BWG	breed=holstein	rs110292608
6	block_190_chr_6	rs109134234	rs41652042	45135036	45156602	21566	0.05278	Production	45156600	45156604	QTL_ID=66530	trait=Body_weight_(birth)	Abbrev=BW	breed=holstein	rs109353886
6	block_190_chr_6	rs109134234	rs41652042	45135036	45156602	21566	0.05278	Production	45156600	45156604	QTL_ID=67607	trait=Body_weight_(yearling)	Abbrev=W365	breed=holstein	rs109353886
6	block_190_chr_6	rs109134234	rs41652042	45135036	45156602	21566	0.05278	Production	45156600	45156604	QTL_ID=67608	trait=Body_weight_gain	Abbrev=BWG	breed=holstein	rs109318073
6	block_229_chr_6	rs42291290	rs42290148	54666635	54735929	69294	0.03433	Exterior	54705681	54705685	QTL_ID=42021	trait=Dairy_form	Abbrev=DYF	breed=holstein	rs133896019
6	block_229_chr_6	rs42291290	rs42290148	54666635	54735929	69294	0.03433	Exterior	54705681	54705685	QTL_ID=42022	trait=Feet_and_leg_conformation	Abbrev=FTLEG	breed=holstein	rs134466836
6	block_229_chr_6	rs42291290	rs42290148	54666635	54735929	69294	0.03433	Exterior	54705681	54705685	QTL_ID=42024	trait=Teat_placement_-_front	Abbrev=FTPL	breed=holstein	rs134466836
6	block_229_chr_6	rs42291290	rs42290148	54666635	54735929	69294	0.03433	Exterior	54705681	54705685	QTL_ID=42025	trait=Udder_attachment	Abbrev=UA	breed=israeli_holstein	rs134466836
6	block_229_chr_6	rs42291290	rs42290148	54666635	54735929	69294	0.03433	Exterior	54705681	54705685	QTL_ID=42026	trait=Teat_placement_-_rear	Abbrev=RTPL	breed=holstein	rs109355052
6	block_229_chr_6	rs42291290	rs42290148	54666635	54735929	69294	0.03433	Exterior	54705681	54705685	QTL_ID=42027	trait=Udder_height	Abbrev=UHT	breed=holstein	rs109355052
6	block_229_chr_6	rs42291290	rs42290148	54666635	54735929	69294	0.03433	Exterior	54705681	54705685	QTL_ID=42029	trait=Stature	Abbrev=STA	breed=holstein	rs109355052
6	block_229_chr_6	rs42291290	rs42290148	54666635	54735929	69294	0.03433	Exterior	54705681	54705685	QTL_ID=42030	trait=Udder_cleft	Abbrev=UC	breed=Fleckvieh	rs41610285
6	block_229_chr_6	rs42291290	rs42290148	54666635	54735929	69294	0.03433	Exterior	54705681	54705685	QTL_ID=42031	trait=Udder_depth	Abbrev=UDPTH	breed=holstein	rs41610285
6	block_229_chr_6	rs42291290	rs42290148	54666635	54735929	69294	0.03433	Health	54666633	54666637	QTL_ID=147593	trait=Ketosis	Abbrev=KETO	breed=charolais,gelbvieh,hereford,limousin,simmental,Angus	rs110341880
6	block_229_chr_6	rs42291290	rs42290148	54666635	54735929	69294	0.03433	Health	54688534	54688538	QTL_ID=147594	trait=Ketosis	Abbrev=KETO	breed=charolais,gelbvieh,hereford,limousin,simmental,Angus	rs110639283
6	block_229_chr_6	rs42291290	rs42290148	54666635	54735929	69294	0.03433	Health	54735927	54735931	QTL_ID=147602	trait=Ketosis	Abbrev=KETO	breed=charolais,gelbvieh,hereford,limousin,simmental,Angus	rs110397437
6	block_229_chr_6	rs42291290	rs42290148	54666635	54735929	69294	0.03433	Production	54705681	54705685	QTL_ID=42020	trait=Body_depth	Abbrev=BD	breed=holstein	rs133896019
6	block_229_chr_6	rs42291290	rs42290148	54666635	54735929	69294	0.03433	Production	54705681	54705685	QTL_ID=42023	trait=PTA_type	Abbrev=PTAT	breed=holstein	rs134466836
6	block_229_chr_6	rs42291290	rs42290148	54666635	54735929	69294	0.03433	Production	54705681	54705685	QTL_ID=42028	trait=Rump_width	Abbrev=RUMWD	breed=holstein	rs109355052
6	block_272_chr_6	rs109738132	rs41589903	68159201	68192608	33407	0.03598	Exterior	68159199	68159203	QTL_ID=37348	trait=Eye_area_pigmentation	Abbrev=EYEAP	breed=holstein	rs43703013
6	block_272_chr_6	rs109738132	rs41589903	68159201	68192608	33407	0.03598	Exterior	68159199	68159203	QTL_ID=37364	trait=Facial_pigmentation	Abbrev=FPIGMT	breed=holstein	rs43703013
6	block_272_chr_6	rs109738132	rs41589903	68159201	68192608	33407	0.03598	Exterior	68192606	68192610	QTL_ID=37349	trait=Eye_area_pigmentation	Abbrev=EYEAP	breed=holstein	rs43703013
6	block_272_chr_6	rs109738132	rs41589903	68159201	68192608	33407	0.03598	Exterior	68192606	68192610	QTL_ID=37365	trait=Facial_pigmentation	Abbrev=FPIGMT	breed=holstein	rs43703013
6	block_345_chr_6	rs109614068	rs43476044	92911232	92955785	44553	0.03356	Milk	92936920	92936924	QTL_ID=109822	trait=Milk_kappa-casein_percentage	Abbrev=MKCASP	breed=nelore	rs110574421
6	block_345_chr_6	rs109614068	rs43476044	92911232	92955785	44553	0.03356	Milk	92936920	92936924	QTL_ID=115273	trait=Milk_glycosylated_kappa-casein_percentage	Abbrev=MGKCASP	breed=holstein	rs110574421
6	block_345_chr_6	rs109614068	rs43476044	92911232	92955785	44553	0.03356	Milk	92936920	92936924	QTL_ID=117758	trait=Milk_unglycosylated_kappa-casein_percentage	Abbrev=MUGKCASP	breed=holstein	rs110574421
6	block_345_chr_6	rs109614068	rs43476044	92911232	92955785	44553	0.03356	Milk	92955783	92955787	QTL_ID=35278	trait=Milk_protein_yield	Abbrev=PY	breed=holstein	rs110932603
6	block_421_chr_6	rs43152474	rs42868916	109282605	109341593	58988	0.03135	Milk	109341591	109341595	QTL_ID=118860	trait=Milk_unglycosylated_kappa-casein_percentage	Abbrev=MUGKCASP	breed=holstein	rs41578582
6	block_421_chr_6	rs43152474	rs42868916	109282605	109341593	58988	0.03135	Production	109303055	109303059	QTL_ID=65216	trait=Body_weight_(mature)	Abbrev=MWT	breed=holstein	rs133980033
6	block_421_chr_6	rs43152474	rs42868916	109282605	109341593	58988	0.03135	Production	109319932	109319936	QTL_ID=65240	trait=Body_weight_(mature)	Abbrev=MWT	breed=holstein	rs134109877
6	block_451_chr_6	rs41574391	rs109657313	114785574	114812953	27379	0.04702	Production	114785572	114785576	QTL_ID=67490	trait=Body_weight_gain	Abbrev=BWG	breed=holstein	rs110834258
7	block_61_chr_7	rs109815065	rs109755265	16688700	16720758	32058	0.04681	Milk	16688698	16688702	QTL_ID=157440	trait=Milking_speed	Abbrev=MSPD	breed=Angus	rs137135090
7	block_73_chr_7	rs110410267	rs110249839	20264097	20382516	118419	0.03676	Health	20331778	20331782	QTL_ID=96066	trait=Liver_abscess	Abbrev=LIVAB	breed=holstein	rs41616289
7	block_73_chr_7	rs110410267	rs110249839	20264097	20382516	118419	0.03676	Milk	20264095	20264099	QTL_ID=157459	trait=Milking_speed	Abbrev=MSPD	breed=holstein	rs41630373
7	block_73_chr_7	rs110410267	rs110249839	20264097	20382516	118419	0.03676	Milk	20291786	20291790	QTL_ID=157460	trait=Milking_speed	Abbrev=MSPD	breed=holstein	rs41630373
7	block_73_chr_7	rs110410267	rs110249839	20264097	20382516	118419	0.03676	Milk	20324206	20324210	QTL_ID=157461	trait=Milking_speed	Abbrev=MSPD	breed=Angus	rs41630373
7	block_73_chr_7	rs110410267	rs110249839	20264097	20382516	118419	0.03676	Milk	20355412	20355416	QTL_ID=157462	trait=Milking_speed	Abbrev=MSPD	breed=Angus	rs41630373
7	block_73_chr_7	rs110410267	rs110249839	20264097	20382516	118419	0.03676	Production	20377189	20377193	QTL_ID=24684	trait=Body_weight_(mature)	Abbrev=MWT	breed=holstein	rs41616289
7	block_73_chr_7	rs110410267	rs110249839	20264097	20382516	118419	0.03676	Reproduction	20304573	20304577	QTL_ID=177034	trait=Conception_rate	Abbrev=CONCRATE	breed=Angus	rs41630373
7	block_166_chr_7	rs41575808	rs109886610	43085607	43105247	19640	0.04725	Milk	43085605	43085609	QTL_ID=157531	trait=Milking_speed	Abbrev=MSPD	breed=holstein	rs41611219
7	block_222_chr_7	rs110504063	rs41627905	59101278	59173723	72445	0.0417	Exterior	59124348	59124352	QTL_ID=43157	trait=Foot_angle	Abbrev=FANG	breed=holstein	rs41572471
7	block_222_chr_7	rs110504063	rs41627905	59101278	59173723	72445	0.0417	Exterior	59124348	59124352	QTL_ID=43158	trait=Feet_and_leg_conformation	Abbrev=FTLEG	breed=holstein	rs41912461
7	block_222_chr_7	rs110504063	rs41627905	59101278	59173723	72445	0.0417	Exterior	59124348	59124352	QTL_ID=43161	trait=Udder_attachment	Abbrev=UA	breed=holstein	BMS434,BMS434,BMC701
7	block_222_chr_7	rs110504063	rs41627905	59101278	59173723	72445	0.0417	Exterior	59124348	59124352	QTL_ID=43167	trait=Rear_leg_placement_-_rear_view	Abbrev=RLEGR	breed=Angus	rs42329937
7	block_222_chr_7	rs110504063	rs41627905	59101278	59173723	72445	0.0417	Exterior	59124348	59124352	QTL_ID=43171	trait=Stature	Abbrev=STA	breed=holstein	rs41611327
7	block_222_chr_7	rs110504063	rs41627905	59101278	59173723	72445	0.0417	Exterior	59124348	59124352	QTL_ID=43172	trait=Strength	Abbrev=STR	breed=holstein	rs42332072
7	block_222_chr_7	rs110504063	rs41627905	59101278	59173723	72445	0.0417	Exterior	59124348	59124352	QTL_ID=43173	trait=Udder_depth	Abbrev=UDPTH	breed=holstein	rs42332072
7	block_222_chr_7	rs110504063	rs41627905	59101278	59173723	72445	0.0417	Health	59124348	59124352	QTL_ID=43169	trait=Somatic_cell_score	Abbrev=SCS	breed=simmental	rs136138837
7	block_222_chr_7	rs110504063	rs41627905	59101278	59173723	72445	0.0417	Milk	59124348	59124352	QTL_ID=157619	trait=Milking_speed	Abbrev=MSPD	breed=holstein	rs29023608
7	block_222_chr_7	rs110504063	rs41627905	59101278	59173723	72445	0.0417	Milk	59124348	59124352	QTL_ID=43159	trait=Milk_fat_percentage	Abbrev=FP	breed=holstein	rs134163758
7	block_222_chr_7	rs110504063	rs41627905	59101278	59173723	72445	0.0417	Milk	59124348	59124352	QTL_ID=43162	trait=Milk_fat_yield	Abbrev=FY	breed=Girolando	rs41606134
7	block_222_chr_7	rs110504063	rs41627905	59101278	59173723	72445	0.0417	Milk	59124348	59124352	QTL_ID=43165	trait=Milk_protein_percentage	Abbrev=PP	breed=nelore	CSSM056
7	block_222_chr_7	rs110504063	rs41627905	59101278	59173723	72445	0.0417	Milk	59124348	59124352	QTL_ID=43166	trait=Milk_protein_yield	Abbrev=PY	breed=Angus	CSSM056
7	block_222_chr_7	rs110504063	rs41627905	59101278	59173723	72445	0.0417	Production	59124348	59124352	QTL_ID=43154	trait=Body_depth	Abbrev=BD	breed=holstein	rs136330197
7	block_222_chr_7	rs110504063	rs41627905	59101278	59173723	72445	0.0417	Production	59124348	59124352	QTL_ID=43160	trait=PTA_type	Abbrev=PTAT	breed=holstein	BMS434,BMS434,BMC701
7	block_222_chr_7	rs110504063	rs41627905	59101278	59173723	72445	0.0417	Production	59124348	59124352	QTL_ID=43163	trait=Net_merit	Abbrev=NM	breed=holstein	rs41606134
7	block_222_chr_7	rs110504063	rs41627905	59101278	59173723	72445	0.0417	Production	59124348	59124352	QTL_ID=43164	trait=Length_of_productive_life	Abbrev=PL	breed=Angus	rs43161714
7	block_222_chr_7	rs110504063	rs41627905	59101278	59173723	72445	0.0417	Reproduction	59124348	59124352	QTL_ID=43155	trait=Calving_ease_(maternal)	Abbrev=CALEASE	breed=holstein	rs133125776
7	block_222_chr_7	rs110504063	rs41627905	59101278	59173723	72445	0.0417	Reproduction	59124348	59124352	QTL_ID=43156	trait=Daughter_pregnancy_rate	Abbrev=DPR	breed=holstein	rs137060698
7	block_222_chr_7	rs110504063	rs41627905	59101278	59173723	72445	0.0417	Reproduction	59124348	59124352	QTL_ID=43168	trait=Calving_ease	Abbrev=CALEASE	breed=simmental	rs42336518
7	block_222_chr_7	rs110504063	rs41627905	59101278	59173723	72445	0.0417	Reproduction	59124348	59124352	QTL_ID=43170	trait=Stillbirth	Abbrev=SB	breed=holstein	ILSTS013,BMS1724
7	block_342_chr_7	rs41605716	rs41580804	89523902	89546406	22504	0.05361	Exterior	89523900	89523904	QTL_ID=43369	trait=Dairy_form	Abbrev=DYF	breed=brahman	rs29025644,rs110378393
7	block_342_chr_7	rs41605716	rs41580804	89523902	89546406	22504	0.05361	Exterior	89523900	89523904	QTL_ID=43370	trait=Feet_and_leg_conformation	Abbrev=FTLEG	breed=charolais,chianina,gelbvieh,hereford,holstein,limousin,piedmontese,red_angus,simmental,Angus,Maine-Anjou	rs43643999,rs109559045
7	block_342_chr_7	rs41605716	rs41580804	89523902	89546406	22504	0.05361	Exterior	89523900	89523904	QTL_ID=43372	trait=Teat_placement_-_front	Abbrev=FTPL	breed=holstein	rs41656867,rs109989268
7	block_342_chr_7	rs41605716	rs41580804	89523902	89546406	22504	0.05361	Exterior	89523900	89523904	QTL_ID=43373	trait=Udder_attachment	Abbrev=UA	breed=holstein	rs43642998,rs43650173
7	block_342_chr_7	rs41605716	rs41580804	89523902	89546406	22504	0.05361	Exterior	89523900	89523904	QTL_ID=43374	trait=Rear_leg_placement_-_rear_view	Abbrev=RLEGR	breed=holstein	rs109914287,rs43650187
7	block_342_chr_7	rs41605716	rs41580804	89523902	89546406	22504	0.05361	Exterior	89523900	89523904	QTL_ID=43375	trait=Teat_placement_-_rear	Abbrev=RTPL	breed=charolais,chianina,gelbvieh,hereford,holstein,limousin,piedmontese,red_angus,simmental,Angus,Maine-Anjou	rs110179938,rs110169119
7	block_342_chr_7	rs41605716	rs41580804	89523902	89546406	22504	0.05361	Exterior	89523900	89523904	QTL_ID=43376	trait=Udder_height	Abbrev=UHT	breed=charolais,gelbvieh,hereford,limousin,pinzgauer,red_angus,red_poll,simmental,Angus	rs110201865,rs110056495
7	block_342_chr_7	rs41605716	rs41580804	89523902	89546406	22504	0.05361	Exterior	89523900	89523904	QTL_ID=43378	trait=Stature	Abbrev=STA	breed=charolais,gelbvieh,hereford,limousin,pinzgauer,red_angus,red_poll,simmental,Angus	rs43642675,rs43643308
7	block_342_chr_7	rs41605716	rs41580804	89523902	89546406	22504	0.05361	Exterior	89523900	89523904	QTL_ID=43379	trait=Strength	Abbrev=STR	breed=charolais,gelbvieh,hereford,limousin,pinzgauer,red_angus,red_poll,simmental,Angus	rs41593885,rs110566925
7	block_342_chr_7	rs41605716	rs41580804	89523902	89546406	22504	0.05361	Exterior	89523900	89523904	QTL_ID=43380	trait=Udder_cleft	Abbrev=UC	breed=holstein	rs43647828,rs42868836
7	block_342_chr_7	rs41605716	rs41580804	89523902	89546406	22504	0.05361	Exterior	89523900	89523904	QTL_ID=43381	trait=Udder_depth	Abbrev=UDPTH	breed=holstein	rs110584450,rs109103352
7	block_342_chr_7	rs41605716	rs41580804	89523902	89546406	22504	0.05361	Exterior	89546404	89546408	QTL_ID=43383	trait=Dairy_form	Abbrev=DYF	breed=holstein	rs132960291,rs110702652,rs136362611
7	block_342_chr_7	rs41605716	rs41580804	89523902	89546406	22504	0.05361	Exterior	89546404	89546408	QTL_ID=43384	trait=Feet_and_leg_conformation	Abbrev=FTLEG	breed=charolais,gelbvieh,hereford,limousin,pinzgauer,red_angus,red_poll,simmental,Angus	rs132960291,rs110702652,rs136362611
7	block_342_chr_7	rs41605716	rs41580804	89523902	89546406	22504	0.05361	Exterior	89546404	89546408	QTL_ID=43386	trait=Teat_placement_-_front	Abbrev=FTPL	breed=ayrshire,danish_red,holstein,jersey,norwegian_red,Swedish_Red-and-White	rs43619255,rs41655411,rs43614585
7	block_342_chr_7	rs41605716	rs41580804	89523902	89546406	22504	0.05361	Exterior	89546404	89546408	QTL_ID=43387	trait=Udder_attachment	Abbrev=UA	breed=holstein	rs135198463,rs41597142,rs136081666
7	block_342_chr_7	rs41605716	rs41580804	89523902	89546406	22504	0.05361	Exterior	89546404	89546408	QTL_ID=43388	trait=Rear_leg_placement_-_rear_view	Abbrev=RLEGR	breed=holstein	rs109898540
7	block_342_chr_7	rs41605716	rs41580804	89523902	89546406	22504	0.05361	Exterior	89546404	89546408	QTL_ID=43389	trait=Teat_placement_-_rear	Abbrev=RTPL	breed=holstein	rs109755494
7	block_342_chr_7	rs41605716	rs41580804	89523902	89546406	22504	0.05361	Exterior	89546404	89546408	QTL_ID=43390	trait=Udder_height	Abbrev=UHT	breed=holstein	rs109220955
7	block_342_chr_7	rs41605716	rs41580804	89523902	89546406	22504	0.05361	Exterior	89546404	89546408	QTL_ID=43392	trait=Stature	Abbrev=STA	breed=holstein	rs29022040
7	block_342_chr_7	rs41605716	rs41580804	89523902	89546406	22504	0.05361	Exterior	89546404	89546408	QTL_ID=43393	trait=Strength	Abbrev=STR	breed=holstein	rs137826123
7	block_342_chr_7	rs41605716	rs41580804	89523902	89546406	22504	0.05361	Exterior	89546404	89546408	QTL_ID=43394	trait=Udder_cleft	Abbrev=UC	breed=brahman	rs133252628
7	block_342_chr_7	rs41605716	rs41580804	89523902	89546406	22504	0.05361	Exterior	89546404	89546408	QTL_ID=43395	trait=Udder_depth	Abbrev=UDPTH	breed=brahman	rs137713131
7	block_342_chr_7	rs41605716	rs41580804	89523902	89546406	22504	0.05361	Production	89523900	89523904	QTL_ID=43368	trait=Body_depth	Abbrev=BD	breed=blonde_d'aquitaine	rs42802606,rs41656325
7	block_342_chr_7	rs41605716	rs41580804	89523902	89546406	22504	0.05361	Production	89523900	89523904	QTL_ID=43371	trait=PTA_type	Abbrev=PTAT	breed=charolais,chianina,gelbvieh,hereford,holstein,limousin,piedmontese,red_angus,simmental,Angus,Maine-Anjou	rs43642952,rs43637279
7	block_342_chr_7	rs41605716	rs41580804	89523902	89546406	22504	0.05361	Production	89523900	89523904	QTL_ID=43377	trait=Rump_width	Abbrev=RUMWD	breed=Angus	rs110838923,rs41594273
7	block_342_chr_7	rs41605716	rs41580804	89523902	89546406	22504	0.05361	Production	89546404	89546408	QTL_ID=43382	trait=Body_depth	Abbrev=BD	breed=holstein	rs43643837,rs42868892
7	block_342_chr_7	rs41605716	rs41580804	89523902	89546406	22504	0.05361	Production	89546404	89546408	QTL_ID=43385	trait=PTA_type	Abbrev=PTAT	breed=holstein	rs43619255,rs41655411,rs43614585
7	block_342_chr_7	rs41605716	rs41580804	89523902	89546406	22504	0.05361	Production	89546404	89546408	QTL_ID=43391	trait=Rump_width	Abbrev=RUMWD	breed=holstein	rs137527434
7	block_351_chr_7	rs109398264	rs41658542	95763928	95844936	81008	0.02889	Exterior	95813209	95813213	QTL_ID=43455	trait=Dairy_form	Abbrev=DYF	breed=holstein	rs133786459
7	block_351_chr_7	rs109398264	rs41658542	95763928	95844936	81008	0.02889	Exterior	95813209	95813213	QTL_ID=43458	trait=Teat_placement_-_rear	Abbrev=RTPL	breed=holstein	rs109420502,rs110779428
7	block_351_chr_7	rs109398264	rs41658542	95763928	95844936	81008	0.02889	Exterior	95813209	95813213	QTL_ID=43459	trait=Udder_height	Abbrev=UHT	breed=holstein	rs109741898
7	block_351_chr_7	rs109398264	rs41658542	95763928	95844936	81008	0.02889	Exterior	95813209	95813213	QTL_ID=43461	trait=Teat_length	Abbrev=TLGTH	breed=holstein	rs137705382
7	block_351_chr_7	rs109398264	rs41658542	95763928	95844936	81008	0.02889	Exterior	95813209	95813213	QTL_ID=43462	trait=Udder_cleft	Abbrev=UC	breed=holstein	rs137705382
7	block_351_chr_7	rs109398264	rs41658542	95763928	95844936	81008	0.02889	Exterior	95844934	95844938	QTL_ID=43463	trait=Dairy_form	Abbrev=DYF	breed=piedmontese,simmental,Angus	rs109089864
7	block_351_chr_7	rs109398264	rs41658542	95763928	95844936	81008	0.02889	Exterior	95844934	95844938	QTL_ID=43470	trait=Teat_placement_-_rear	Abbrev=RTPL	breed=holstein	rs797745899
7	block_351_chr_7	rs109398264	rs41658542	95763928	95844936	81008	0.02889	Exterior	95844934	95844938	QTL_ID=43471	trait=Udder_height	Abbrev=UHT	breed=holstein	rs209341745,rs109165355
7	block_351_chr_7	rs109398264	rs41658542	95763928	95844936	81008	0.02889	Exterior	95844934	95844938	QTL_ID=43474	trait=Teat_length	Abbrev=TLGTH	breed=brahman	rs134679432
7	block_351_chr_7	rs109398264	rs41658542	95763928	95844936	81008	0.02889	Exterior	95844934	95844938	QTL_ID=43475	trait=Udder_cleft	Abbrev=UC	breed=charolais,gelbvieh,hereford,limousin,pinzgauer,red_angus,red_poll,simmental,Angus	rs110020967
7	block_351_chr_7	rs109398264	rs41658542	95763928	95844936	81008	0.02889	Milk	95813209	95813213	QTL_ID=43457	trait=Milk_protein_percentage	Abbrev=PP	breed=holstein	rs109420502,rs110779428
7	block_351_chr_7	rs109398264	rs41658542	95763928	95844936	81008	0.02889	Milk	95844934	95844938	QTL_ID=43465	trait=Milk_fat_percentage	Abbrev=FP	breed=holstein	rs109758523
7	block_351_chr_7	rs109398264	rs41658542	95763928	95844936	81008	0.02889	Milk	95844934	95844938	QTL_ID=43466	trait=Milk_fat_yield	Abbrev=FY	breed=holstein	rs110717838
7	block_351_chr_7	rs109398264	rs41658542	95763928	95844936	81008	0.02889	Milk	95844934	95844938	QTL_ID=43468	trait=Milk_protein_percentage	Abbrev=PP	breed=Wagyu	rs211405588
7	block_351_chr_7	rs109398264	rs41658542	95763928	95844936	81008	0.02889	Milk	95844934	95844938	QTL_ID=43469	trait=Milk_protein_yield	Abbrev=PY	breed=braunvieh,holstein,jersey,normande,norwegian_red,Fleckvieh,MontbÃ©liarde,Australian_Red	rs797745899
7	block_351_chr_7	rs109398264	rs41658542	95763928	95844936	81008	0.02889	Production	95813209	95813213	QTL_ID=43456	trait=PTA_type	Abbrev=PTAT	breed=holstein	rs109420502,rs110779428
7	block_351_chr_7	rs109398264	rs41658542	95763928	95844936	81008	0.02889	Production	95844934	95844938	QTL_ID=43467	trait=Net_merit	Abbrev=NM	breed=Wagyu	rs109758523
7	block_351_chr_7	rs109398264	rs41658542	95763928	95844936	81008	0.02889	Reproduction	95813209	95813213	QTL_ID=43460	trait=Calving_ease	Abbrev=CALEASE	breed=holstein	rs109205723
7	block_351_chr_7	rs109398264	rs41658542	95763928	95844936	81008	0.02889	Reproduction	95844934	95844938	QTL_ID=43464	trait=Daughter_pregnancy_rate	Abbrev=DPR	breed=charolais,gelbvieh,hereford,limousin,pinzgauer,red_angus,red_poll,simmental,Angus	rs110717838
7	block_351_chr_7	rs109398264	rs41658542	95763928	95844936	81008	0.02889	Reproduction	95844934	95844938	QTL_ID=43472	trait=Calving_ease	Abbrev=CALEASE	breed=holstein	rs209341745,rs109165355
7	block_351_chr_7	rs109398264	rs41658542	95763928	95844936	81008	0.02889	Reproduction	95844934	95844938	QTL_ID=43473	trait=Stillbirth	Abbrev=SB	breed=brahman	rs134679432
8	block_22_chr_8	rs41592207	rs110338031	8468112	8523201	55089	0.02854	Milk	8468110	8468114	QTL_ID=25438	trait=Milk_yield	Abbrev=MY	breed=nelore	rs41607431
8	block_22_chr_8	rs41592207	rs110338031	8468112	8523201	55089	0.02854	Milk	8468110	8468114	QTL_ID=26242	trait=Milk_protein_yield	Abbrev=PY	breed=nelore	rs41607431
8	block_27_chr_8	rs41638903	rs110713930	9477100	9576222	99122	0.03221	Milk	9477098	9477102	QTL_ID=125394	trait=Lactation_persistency	Abbrev=LACTPER	breed=holstein	rs41607431
8	block_159_chr_8	rs43553193	rs41654687	43970992	43998136	27144	0.02967	Health	43993393	43993397	QTL_ID=178966	trait=Bovine_tuberculosis_susceptibility	Abbrev=BTBS	breed=holstein	rs43630014
9	block_18_chr_9	rs43113400	rs43099374	4645943	4678072	32129	0.03518	Exterior	4678070	4678074	QTL_ID=43876	trait=Rump_angle	Abbrev=RANG	breed=holstein	rs109368336
9	block_18_chr_9	rs43113400	rs43099374	4645943	4678072	32129	0.03518	Exterior	4678070	4678074	QTL_ID=43877	trait=Rear_leg_placement_-_side_view	Abbrev=RLEGS	breed=holstein	rs110387793
9	block_18_chr_9	rs43113400	rs43099374	4645943	4678072	32129	0.03518	Milk	4678070	4678074	QTL_ID=43874	trait=Milk_fat_yield	Abbrev=FY	breed=holstein	rs109207486,rs41596899,rs41592726
9	block_18_chr_9	rs43113400	rs43099374	4645943	4678072	32129	0.03518	Milk	4678070	4678074	QTL_ID=43875	trait=Milk_protein_yield	Abbrev=PY	breed=holstein	rs108992288
9	block_73_chr_9	rs41627644	rs110042295	22545838	22573574	27736	0.0426	Milk	22562865	22562869	QTL_ID=33900	trait=Milk_caproic_acid_content	Abbrev=MFA-C6:0	breed=holstein	rs29026129
9	block_73_chr_9	rs41627644	rs110042295	22545838	22573574	27736	0.0426	Milk	22569452	22569456	QTL_ID=33806	trait=Milk_caproic_acid_content	Abbrev=MFA-C6:0	breed=holstein	rs43660984
9	block_73_chr_9	rs41627644	rs110042295	22545838	22573574	27736	0.0426	Production	22573572	22573576	QTL_ID=22597	trait=Body_weight	Abbrev=BW	breed=holstein	rs478020454
9	block_137_chr_9	rs41971041	rs29014434	36978435	37003884	25449	0.05107	Milk	36978433	36978437	QTL_ID=130701	trait=Curd_water_yield	Abbrev=CYWAT	breed=holstein	rs43663781
9	block_143_chr_9	rs110792419	rs109562368	38688003	38708085	20082	0.03666	Milk	38708083	38708087	QTL_ID=56844	trait=Milk_glycerophosphocholine_to_phosphocholine_ratio	Abbrev=GPCPC	breed=holstein	rs43706832
9	block_180_chr_9	rs41912442	rs41912461	52089421	52118530	29109	0.03811	Milk	52118528	52118532	QTL_ID=25883	trait=Milk_fat_yield	Abbrev=FY	breed=holstein	rs109080418
9	block_180_chr_9	rs41912442	rs41912461	52089421	52118530	29109	0.03811	Production	52118528	52118532	QTL_ID=68070	trait=Body_weight_(yearling)	Abbrev=W365	breed=holstein	rs134123138
9	block_214_chr_9	rs43597925	rs29021263	59283184	59303365	20181	0.02765	Reproduction	59283182	59283186	QTL_ID=28631	trait=Non-return_rate	Abbrev=NRR	breed=holstein	rs42844790
9	block_335_chr_9	rs109911914	rs110651470	95736654	95764451	27797	0.03588	Milk	95759589	95759593	QTL_ID=197322	trait=Milk_myristic_acid_content	Abbrev=MFA-C14:0	breed=holstein	rs41589378
9	block_335_chr_9	rs109911914	rs110651470	95736654	95764451	27797	0.03588	Milk	95759589	95759593	QTL_ID=197323	trait=Milk_myristic_acid_content	Abbrev=MFA-C14:0	breed=holstein,normande,MontbÃ©liarde	rs41589378
10	block_99_chr_10	rs109984433	rs109504145	21334443	21363314	28871	0.04214	Production	21363312	21363316	QTL_ID=68117	trait=Body_weight_(yearling)	Abbrev=W365	breed=holstein	rs109819913
10	block_99_chr_10	rs109984433	rs109504145	21334443	21363314	28871	0.04214	Production	21363312	21363316	QTL_ID=68118	trait=Body_weight_gain	Abbrev=BWG	breed=holstein	rs109313220
10	block_243_chr_10	rs43635411	rs41656664	62428623	62450136	21513	0.03173	Exterior	62428621	62428625	QTL_ID=44800	trait=Dairy_form	Abbrev=DYF	breed=holstein	rs109399552
10	block_243_chr_10	rs43635411	rs41656664	62428623	62450136	21513	0.03173	Exterior	62428621	62428625	QTL_ID=44801	trait=Feet_and_leg_conformation	Abbrev=FTLEG	breed=holstein	rs110333090
10	block_243_chr_10	rs43635411	rs41656664	62428623	62450136	21513	0.03173	Exterior	62428621	62428625	QTL_ID=44803	trait=Teat_placement_-_front	Abbrev=FTPL	breed=holstein	rs110333090
10	block_243_chr_10	rs43635411	rs41656664	62428623	62450136	21513	0.03173	Exterior	62428621	62428625	QTL_ID=44804	trait=Udder_attachment	Abbrev=UA	breed=holstein	rs109255853
10	block_243_chr_10	rs43635411	rs41656664	62428623	62450136	21513	0.03173	Exterior	62428621	62428625	QTL_ID=44805	trait=Teat_placement_-_rear	Abbrev=RTPL	breed=holstein	rs109816938
10	block_243_chr_10	rs43635411	rs41656664	62428623	62450136	21513	0.03173	Exterior	62428621	62428625	QTL_ID=44806	trait=Udder_height	Abbrev=UHT	breed=charolais,gelbvieh,hereford,limousin,pinzgauer,red_angus,red_poll,simmental,Angus	rs41621862
10	block_243_chr_10	rs43635411	rs41656664	62428623	62450136	21513	0.03173	Exterior	62428621	62428625	QTL_ID=44809	trait=Stature	Abbrev=STA	breed=charolais,gelbvieh,hereford,limousin,pinzgauer,red_angus,red_poll,simmental,Angus	rs41601379
10	block_243_chr_10	rs43635411	rs41656664	62428623	62450136	21513	0.03173	Exterior	62428621	62428625	QTL_ID=44810	trait=Strength	Abbrev=STR	breed=holstein	rs41601379
10	block_243_chr_10	rs43635411	rs41656664	62428623	62450136	21513	0.03173	Exterior	62428621	62428625	QTL_ID=44811	trait=Udder_cleft	Abbrev=UC	breed=nelore	rs110622921
10	block_243_chr_10	rs43635411	rs41656664	62428623	62450136	21513	0.03173	Exterior	62428621	62428625	QTL_ID=44812	trait=Udder_depth	Abbrev=UDPTH	breed=Girolando	rs41572603
10	block_243_chr_10	rs43635411	rs41656664	62428623	62450136	21513	0.03173	Exterior	62450134	62450138	QTL_ID=44815	trait=Dairy_form	Abbrev=DYF	breed=holstein,jersey	rs109807979,rs110144789,rs110421237
10	block_243_chr_10	rs43635411	rs41656664	62428623	62450136	21513	0.03173	Exterior	62450134	62450138	QTL_ID=44817	trait=Teat_placement_-_front	Abbrev=FTPL	breed=holstein	rs109901742
10	block_243_chr_10	rs43635411	rs41656664	62428623	62450136	21513	0.03173	Exterior	62450134	62450138	QTL_ID=44818	trait=Udder_attachment	Abbrev=UA	breed=holstein	rs134137501
10	block_243_chr_10	rs43635411	rs41656664	62428623	62450136	21513	0.03173	Exterior	62450134	62450138	QTL_ID=44819	trait=Teat_placement_-_rear	Abbrev=RTPL	breed=holstein	rs136299004
10	block_243_chr_10	rs43635411	rs41656664	62428623	62450136	21513	0.03173	Exterior	62450134	62450138	QTL_ID=44820	trait=Udder_height	Abbrev=UHT	breed=hereford,Angus	rs110577755
10	block_243_chr_10	rs43635411	rs41656664	62428623	62450136	21513	0.03173	Exterior	62450134	62450138	QTL_ID=44823	trait=Stature	Abbrev=STA	breed=holstein	rs108974706
10	block_243_chr_10	rs43635411	rs41656664	62428623	62450136	21513	0.03173	Exterior	62450134	62450138	QTL_ID=44824	trait=Strength	Abbrev=STR	breed=holstein	rs109549134
10	block_243_chr_10	rs43635411	rs41656664	62428623	62450136	21513	0.03173	Exterior	62450134	62450138	QTL_ID=44825	trait=Udder_cleft	Abbrev=UC	breed=holstein	rs110240312
10	block_243_chr_10	rs43635411	rs41656664	62428623	62450136	21513	0.03173	Exterior	62450134	62450138	QTL_ID=44826	trait=Udder_depth	Abbrev=UDPTH	breed=holstein	rs110852250
10	block_243_chr_10	rs43635411	rs41656664	62428623	62450136	21513	0.03173	Health	62428621	62428625	QTL_ID=44808	trait=Somatic_cell_score	Abbrev=SCS	breed=charolais,gelbvieh,hereford,limousin,pinzgauer,red_angus,red_poll,simmental,Angus	rs41623519
10	block_243_chr_10	rs43635411	rs41656664	62428623	62450136	21513	0.03173	Health	62450134	62450138	QTL_ID=44822	trait=Somatic_cell_score	Abbrev=SCS	breed=charolais,hereford,red_angus,Angus	rs41621875
10	block_243_chr_10	rs43635411	rs41656664	62428623	62450136	21513	0.03173	Production	62428621	62428625	QTL_ID=23797	trait=Body_weight_(weaning)	Abbrev=WWT	breed=holstein	rs41572603
10	block_243_chr_10	rs43635411	rs41656664	62428623	62450136	21513	0.03173	Production	62428621	62428625	QTL_ID=44798	trait=Body_depth	Abbrev=BD	breed=holstein	rs109492180
10	block_243_chr_10	rs43635411	rs41656664	62428623	62450136	21513	0.03173	Production	62428621	62428625	QTL_ID=44802	trait=PTA_type	Abbrev=PTAT	breed=holstein	rs110958760
10	block_243_chr_10	rs43635411	rs41656664	62428623	62450136	21513	0.03173	Production	62428621	62428625	QTL_ID=44807	trait=Rump_width	Abbrev=RUMWD	breed=charolais,gelbvieh,hereford,limousin,pinzgauer,red_angus,red_poll,simmental,Angus	rs110958760
10	block_243_chr_10	rs43635411	rs41656664	62428623	62450136	21513	0.03173	Production	62450134	62450138	QTL_ID=44813	trait=Body_depth	Abbrev=BD	breed=holstein	rs136225145
10	block_243_chr_10	rs43635411	rs41656664	62428623	62450136	21513	0.03173	Production	62450134	62450138	QTL_ID=44816	trait=PTA_type	Abbrev=PTAT	breed=holstein	rs132650600
10	block_243_chr_10	rs43635411	rs41656664	62428623	62450136	21513	0.03173	Production	62450134	62450138	QTL_ID=44821	trait=Rump_width	Abbrev=RUMWD	breed=hereford,Angus	rs133199127
10	block_243_chr_10	rs43635411	rs41656664	62428623	62450136	21513	0.03173	Reproduction	62428621	62428625	QTL_ID=44799	trait=Calving_ease_(maternal)	Abbrev=CALEASE	breed=holstein	rs110502669
10	block_243_chr_10	rs43635411	rs41656664	62428623	62450136	21513	0.03173	Reproduction	62450134	62450138	QTL_ID=44814	trait=Calving_ease_(maternal)	Abbrev=CALEASE	breed=charolais,gelbvieh,hereford,limousin,pinzgauer,red_angus,red_poll,simmental,Angus	rs137268104
10	block_251_chr_10	rs29021678	rs29020033	66770420	66795795	25375	0.0329	Milk	66770418	66770422	QTL_ID=157815	trait=Milking_speed	Abbrev=MSPD	breed=holstein	rs110859092
10	block_251_chr_10	rs29021678	rs29020033	66770420	66795795	25375	0.0329	Milk	66770418	66770422	QTL_ID=26290	trait=Milk_protein_yield	Abbrev=PY	breed=holstein	rs109343988,rs109907194,rs110788899
10	block_251_chr_10	rs29021678	rs29020033	66770420	66795795	25375	0.0329	Milk	66795793	66795797	QTL_ID=157816	trait=Milking_speed	Abbrev=MSPD	breed=holstein	rs110859092
10	block_264_chr_10	rs110268024	rs41624664	69208468	69259877	51409	0.03395	Milk	69231945	69231949	QTL_ID=157836	trait=Milking_speed	Abbrev=MSPD	breed=charolais,gelbvieh,hereford,limousin,pinzgauer,red_angus,red_poll,simmental,Angus	rs109102971
10	block_264_chr_10	rs110268024	rs41624664	69208468	69259877	51409	0.03395	Milk	69259875	69259879	QTL_ID=157837	trait=Milking_speed	Abbrev=MSPD	breed=holstein	rs109117924
10	block_392_chr_10	rs110572986	rs109837613	99680118	99710643	30525	0.04056	Production	99706895	99706899	QTL_ID=65486	trait=Maturity_rate	Abbrev=MATRATE	breed=holstein	rs133460908
11	block_139_chr_11	rs109597719	rs42587069	30282753	30352564	69811	0.02981	Exterior	30331726	30331730	QTL_ID=45294	trait=Dairy_form	Abbrev=DYF	breed=holstein	rs41630162
11	block_139_chr_11	rs109597719	rs42587069	30282753	30352564	69811	0.02981	Exterior	30331726	30331730	QTL_ID=45295	trait=Feet_and_leg_conformation	Abbrev=FTLEG	breed=holstein	rs42442683
11	block_139_chr_11	rs109597719	rs42587069	30282753	30352564	69811	0.02981	Exterior	30331726	30331730	QTL_ID=45297	trait=Udder_attachment	Abbrev=UA	breed=holstein	rs42443071
11	block_139_chr_11	rs109597719	rs42587069	30282753	30352564	69811	0.02981	Exterior	30331726	30331730	QTL_ID=45299	trait=Udder_height	Abbrev=UHT	breed=brown_swiss	rs41692543
11	block_139_chr_11	rs109597719	rs42587069	30282753	30352564	69811	0.02981	Exterior	30331726	30331730	QTL_ID=45301	trait=Stature	Abbrev=STA	breed=ayrshire	rs41585357
11	block_139_chr_11	rs109597719	rs42587069	30282753	30352564	69811	0.02981	Exterior	30331726	30331730	QTL_ID=45302	trait=Strength	Abbrev=STR	breed=ayrshire	rs41698238
11	block_139_chr_11	rs109597719	rs42587069	30282753	30352564	69811	0.02981	Exterior	30331726	30331730	QTL_ID=45303	trait=Udder_cleft	Abbrev=UC	breed=ayrshire	rs109943941
11	block_139_chr_11	rs109597719	rs42587069	30282753	30352564	69811	0.02981	Exterior	30331726	30331730	QTL_ID=45304	trait=Udder_depth	Abbrev=UDPTH	breed=ayrshire	rs41699268
11	block_139_chr_11	rs109597719	rs42587069	30282753	30352564	69811	0.02981	Milk	30310610	30310614	QTL_ID=112659	trait=Milk_kappa-casein_percentage	Abbrev=MKCASP	breed=holstein	rs135349550
11	block_139_chr_11	rs109597719	rs42587069	30282753	30352564	69811	0.02981	Milk	30310610	30310614	QTL_ID=119418	trait=Milk_unglycosylated_kappa-casein_percentage	Abbrev=MUGKCASP	breed=holstein	rs109291761
11	block_139_chr_11	rs109597719	rs42587069	30282753	30352564	69811	0.02981	Production	30331726	30331730	QTL_ID=45293	trait=Body_depth	Abbrev=BD	breed=holstein	rs41585348
11	block_139_chr_11	rs109597719	rs42587069	30282753	30352564	69811	0.02981	Production	30331726	30331730	QTL_ID=45296	trait=PTA_type	Abbrev=PTAT	breed=holstein	rs42442702
11	block_139_chr_11	rs109597719	rs42587069	30282753	30352564	69811	0.02981	Production	30331726	30331730	QTL_ID=45298	trait=Net_merit	Abbrev=NM	breed=holstein	rs41692585
11	block_139_chr_11	rs109597719	rs42587069	30282753	30352564	69811	0.02981	Production	30331726	30331730	QTL_ID=45300	trait=Rump_width	Abbrev=RUMWD	breed=MontbÃ©liarde	rs110014240
11	block_139_chr_11	rs109597719	rs42587069	30282753	30352564	69811	0.02981	Reproduction	30331726	30331730	QTL_ID=138517	trait=Non-return_rate	Abbrev=NRR	breed=charolais,gelbvieh,hereford,limousin,pinzgauer,red_angus,red_poll,simmental,Angus	rs41692756
11	block_204_chr_11	rs29020516	rs110397745	50142429	50202868	60439	0.03288	Production	50202866	50202870	QTL_ID=68310	trait=Body_weight_gain	Abbrev=BWG	breed=simmental	rs41603335
11	block_313_chr_11	rs110195627	rs41623510	85937536	85972950	35414	0.03833	Milk	85972948	85972952	QTL_ID=96039	trait=Time_to_curd_firmness	Abbrev=TCURDF	breed=holstein	rs41707249
11	block_313_chr_11	rs110195627	rs41623510	85937536	85972950	35414	0.03833	Reproduction	85937534	85937538	QTL_ID=138471	trait=Interval_to_first_estrus_after_calving	Abbrev=CALEST	breed=holstein	rs43206444
12	block_190_chr_12	rs41627728	rs41576936	56276159	56304446	28287	0.03681	Milk	56297589	56297593	QTL_ID=64240	trait=Milk_riboflavin_content	Abbrev=RIBO	breed=holstein	rs464965129
12	block_190_chr_12	rs41627728	rs41576936	56276159	56304446	28287	0.03681	Milk	56299882	56299886	QTL_ID=64241	trait=Milk_riboflavin_content	Abbrev=RIBO	breed=holstein	rs473800316
12	block_190_chr_12	rs41627728	rs41576936	56276159	56304446	28287	0.03681	Milk	56304444	56304448	QTL_ID=64242	trait=Milk_riboflavin_content	Abbrev=RIBO	breed=holstein	rs468213956
13	block_10_chr_13	rs42448837	rs42444116	2064084	2133989	69905	0.02843	Production	2108290	2108294	QTL_ID=164051	trait=Body_weight_(birth)	Abbrev=BW	breed=norwegian_red	rs110351374
13	block_10_chr_13	rs42448837	rs42444116	2064084	2133989	69905	0.02843	Production	2108290	2108294	QTL_ID=164407	trait=Body_weight_(birth)	Abbrev=BW	breed=norwegian_red	rs41629702
13	block_61_chr_13	rs41632339	rs110570541	17147008	17180901	33893	0.02943	Reproduction	17180899	17180903	QTL_ID=30523	trait=Calving_index	Abbrev=CALVIND	breed=brown_swiss	rs109146371
13	block_68_chr_13	rs110403521	rs109869165	18870958	18892498	21540	0.02824	Reproduction	18892496	18892500	QTL_ID=15278	trait=Interval_to_first_estrus_after_calving	Abbrev=CALEST	breed=Angus	rs133271979
13	block_304_chr_13	rs42799141	rs110815518	76117977	76142546	24569	0.03967	Reproduction	76130448	76130452	QTL_ID=176799	trait=First_service_conception	Abbrev=FSC	breed=ayrshire,danish_red,Swedish_Red-and-White	rs109326954,rs109234250
13	block_304_chr_13	rs42799141	rs110815518	76117977	76142546	24569	0.03967	Reproduction	76130448	76130452	QTL_ID=177143	trait=Conception_rate	Abbrev=CONCRATE	breed=ayrshire,danish_red,Swedish_Red-and-White	rs109326954,rs109234250
13	block_326_chr_13	rs110975495	rs41713665	79185256	79206862	21606	0.03436	Milk	79186753	79186757	QTL_ID=35024	trait=Milk_linoleic_acid_content	Abbrev=MFA-C18:2	breed=holstein	rs110554653
13	block_326_chr_13	rs110975495	rs41713665	79185256	79206862	21606	0.03436	Milk	79188139	79188143	QTL_ID=34964	trait=Milk_linoleic_acid_content	Abbrev=MFA-C18:2	breed=charolais,limousin,retinta	rs384217266
13	block_326_chr_13	rs110975495	rs41713665	79185256	79206862	21606	0.03436	Milk	79189073	79189077	QTL_ID=35025	trait=Milk_linoleic_acid_content	Abbrev=MFA-C18:2	breed=holstein	rs379747746
13	block_326_chr_13	rs110975495	rs41713665	79185256	79206862	21606	0.03436	Milk	79206860	79206864	QTL_ID=157919	trait=Milking_speed	Abbrev=MSPD	breed=holstein	rs440334112
14	block_1_chr_14	rs109752439	rs41630614	305780	330256	24476	0.03035	Health	305778	305782	QTL_ID=135436	trait=Heat_tolerance	Abbrev=HEATT	breed=jersey	rs137601646
14	block_1_chr_14	rs109752439	rs41630614	305780	330256	24476	0.03035	Health	330254	330258	QTL_ID=179886	trait=Ketosis	Abbrev=KETO	breed=brown_swiss	rs110076086,rs110574072
14	block_1_chr_14	rs109752439	rs41630614	305780	330256	24476	0.03035	Milk	305778	305782	QTL_ID=102229	trait=Milk_yield	Abbrev=MY	breed=jersey	rs109206036
14	block_1_chr_14	rs109752439	rs41630614	305780	330256	24476	0.03035	Milk	305778	305782	QTL_ID=102532	trait=Milk_fat_yield	Abbrev=FY	breed=holstein	rs207598277
14	block_1_chr_14	rs109752439	rs41630614	305780	330256	24476	0.03035	Milk	305778	305782	QTL_ID=103334	trait=Milk_protein_yield	Abbrev=PY	breed=holstein	rs465417325
14	block_1_chr_14	rs109752439	rs41630614	305780	330256	24476	0.03035	Milk	305778	305782	QTL_ID=103502	trait=Milk_fat_percentage	Abbrev=FP	breed=holstein	rs110889885
14	block_1_chr_14	rs109752439	rs41630614	305780	330256	24476	0.03035	Milk	305778	305782	QTL_ID=104731	trait=Milk_protein_percentage	Abbrev=PP	breed=holstein	rs41573240
14	block_1_chr_14	rs109752439	rs41630614	305780	330256	24476	0.03035	Milk	305778	305782	QTL_ID=109028	trait=Milk_casein_percentage	Abbrev=MCASP	breed=holstein	rs380926636
14	block_1_chr_14	rs109752439	rs41630614	305780	330256	24476	0.03035	Milk	305778	305782	QTL_ID=14950	trait=Milk_yield	Abbrev=MY	breed=holstein	rs134860368
14	block_1_chr_14	rs109752439	rs41630614	305780	330256	24476	0.03035	Milk	305778	305782	QTL_ID=14955	trait=Milk_protein_yield	Abbrev=PY	breed=holstein	rs109546980,rs41566855
14	block_1_chr_14	rs109752439	rs41630614	305780	330256	24476	0.03035	Milk	305778	305782	QTL_ID=14958	trait=Milk_fat_percentage	Abbrev=FP	breed=holstein	rs109082027
14	block_1_chr_14	rs109752439	rs41630614	305780	330256	24476	0.03035	Milk	305778	305782	QTL_ID=156987	trait=Milk_fat_yield	Abbrev=FY	breed=brown_swiss	rs41833730
14	block_1_chr_14	rs109752439	rs41630614	305780	330256	24476	0.03035	Milk	305778	305782	QTL_ID=161562	trait=Milk_cholesterol_content	Abbrev=MCHOL	breed=jersey	rs42228465,rs41635275
14	block_1_chr_14	rs109752439	rs41630614	305780	330256	24476	0.03035	Milk	305778	305782	QTL_ID=166922	trait=Milk_yield	Abbrev=MY	breed=jersey	rs136489503,rs133813605
14	block_1_chr_14	rs109752439	rs41630614	305780	330256	24476	0.03035	Milk	305778	305782	QTL_ID=166933	trait=Milk_fat_percentage	Abbrev=FP	breed=holstein	rs42228465,rs41635275
14	block_1_chr_14	rs109752439	rs41630614	305780	330256	24476	0.03035	Milk	305778	305782	QTL_ID=167438	trait=Milk_fat_percentage	Abbrev=FP	breed=jersey	rs41635270
14	block_1_chr_14	rs109752439	rs41630614	305780	330256	24476	0.03035	Milk	305778	305782	QTL_ID=168186	trait=305-day_milk_yield	Abbrev=MY305	breed=ayrshire,danish_red,Swedish_Red-and-White	rs41723505
14	block_1_chr_14	rs109752439	rs41630614	305780	330256	24476	0.03035	Milk	305778	305782	QTL_ID=170205	trait=305-day_milk_yield	Abbrev=MY305	breed=jersey	rs42228465,rs41635275
14	block_1_chr_14	rs109752439	rs41630614	305780	330256	24476	0.03035	Milk	305778	305782	QTL_ID=173576	trait=Milk_fat_percentage	Abbrev=FP	breed=ayrshire,danish_red,Swedish_Red-and-White	rs41624797
14	block_1_chr_14	rs109752439	rs41630614	305780	330256	24476	0.03035	Milk	305778	305782	QTL_ID=174143	trait=Milk_fat_yield	Abbrev=FY	breed=ayrshire,danish_red,Swedish_Red-and-White	rs208451123
14	block_1_chr_14	rs109752439	rs41630614	305780	330256	24476	0.03035	Milk	305778	305782	QTL_ID=174530	trait=Milk_yield	Abbrev=MY	breed=holstein	rs109029802
14	block_1_chr_14	rs109752439	rs41630614	305780	330256	24476	0.03035	Milk	305778	305782	QTL_ID=174924	trait=Milk_protein_percentage	Abbrev=PP	breed=ayrshire,danish_red,Swedish_Red-and-White	rs109594688
14	block_1_chr_14	rs109752439	rs41630614	305780	330256	24476	0.03035	Milk	305778	305782	QTL_ID=175499	trait=Milk_protein_yield	Abbrev=PY	breed=holstein	rs137269124,rs42410442
14	block_1_chr_14	rs109752439	rs41630614	305780	330256	24476	0.03035	Milk	305778	305782	QTL_ID=176464	trait=Milk_yield	Abbrev=MY	breed=holstein	rs109257200
14	block_1_chr_14	rs109752439	rs41630614	305780	330256	24476	0.03035	Milk	305778	305782	QTL_ID=20881	trait=Milk_fat-to-protein_ratio	Abbrev=MFPRAT	breed=ayrshire,danish_red,Swedish_Red-and-White	rs133020056
14	block_1_chr_14	rs109752439	rs41630614	305780	330256	24476	0.03035	Milk	305778	305782	QTL_ID=25523	trait=Milk_yield	Abbrev=MY	breed=holstein	rs41615088
14	block_1_chr_14	rs109752439	rs41630614	305780	330256	24476	0.03035	Milk	305778	305782	QTL_ID=25922	trait=Milk_fat_yield	Abbrev=FY	breed=holstein	rs41809386
14	block_1_chr_14	rs109752439	rs41630614	305780	330256	24476	0.03035	Milk	305778	305782	QTL_ID=26343	trait=Milk_protein_yield	Abbrev=PY	breed=holstein	rs110136573
14	block_1_chr_14	rs109752439	rs41630614	305780	330256	24476	0.03035	Milk	305778	305782	QTL_ID=26529	trait=Milk_fat_percentage	Abbrev=FP	breed=holstein	rs108979795
14	block_1_chr_14	rs109752439	rs41630614	305780	330256	24476	0.03035	Milk	305778	305782	QTL_ID=26772	trait=Milk_protein_percentage	Abbrev=PP	breed=holstein	rs109712841
14	block_1_chr_14	rs109752439	rs41630614	305780	330256	24476	0.03035	Milk	305778	305782	QTL_ID=27035	trait=Milk_fat_percentage	Abbrev=FP	breed=holstein	rs41623175
14	block_1_chr_14	rs109752439	rs41630614	305780	330256	24476	0.03035	Milk	305778	305782	QTL_ID=31075	trait=Milk_yield	Abbrev=MY	breed=ayrshire,danish_red,Swedish_Red-and-White	rs41724396
14	block_1_chr_14	rs109752439	rs41630614	305780	330256	24476	0.03035	Milk	305778	305782	QTL_ID=31093	trait=Milk_fat_yield	Abbrev=FY	breed=ayrshire,danish_red,Swedish_Red-and-White	rs41724397
14	block_1_chr_14	rs109752439	rs41630614	305780	330256	24476	0.03035	Milk	305778	305782	QTL_ID=32854	trait=Milk_fat_percentage	Abbrev=FP	breed=ayrshire,danish_red,Swedish_Red-and-White	rs41724395
14	block_1_chr_14	rs109752439	rs41630614	305780	330256	24476	0.03035	Milk	305778	305782	QTL_ID=35279	trait=Milk_protein_yield	Abbrev=PY	breed=ayrshire,danish_red,Swedish_Red-and-White	rs41724398
14	block_1_chr_14	rs109752439	rs41630614	305780	330256	24476	0.03035	Milk	305778	305782	QTL_ID=35332	trait=Milk_fat_yield	Abbrev=FY	breed=ayrshire,danish_red,Swedish_Red-and-White	rs41724399
14	block_1_chr_14	rs109752439	rs41630614	305780	330256	24476	0.03035	Milk	305778	305782	QTL_ID=35386	trait=Milk_yield	Abbrev=MY	breed=ayrshire,danish_red,Swedish_Red-and-White	rs41724401
14	block_1_chr_14	rs109752439	rs41630614	305780	330256	24476	0.03035	Milk	305778	305782	QTL_ID=35489	trait=Milk_fat_percentage	Abbrev=FP	breed=ayrshire,danish_red,Swedish_Red-and-White	rs41724396
14	block_1_chr_14	rs109752439	rs41630614	305780	330256	24476	0.03035	Milk	305778	305782	QTL_ID=60838	trait=Milk_fat_percentage	Abbrev=FP	breed=ayrshire,danish_red,Swedish_Red-and-White	rs209702122
14	block_1_chr_14	rs109752439	rs41630614	305780	330256	24476	0.03035	Milk	305778	305782	QTL_ID=60839	trait=Milk_yield	Abbrev=MY	breed=holstein	rs41724385
14	block_1_chr_14	rs109752439	rs41630614	305780	330256	24476	0.03035	Milk	305778	305782	QTL_ID=64284	trait=Milk_riboflavin_content	Abbrev=RIBO	breed=holstein	rs41724387
14	block_1_chr_14	rs109752439	rs41630614	305780	330256	24476	0.03035	Milk	306729	306733	QTL_ID=96759	trait=Milk_yield	Abbrev=MY	breed=ayrshire,danish_red,Swedish_Red-and-White	rs110308401
14	block_1_chr_14	rs109752439	rs41630614	305780	330256	24476	0.03035	Milk	306729	306733	QTL_ID=97751	trait=Milk_fat_yield	Abbrev=FY	breed=ayrshire,danish_red,Swedish_Red-and-White	rs133941363
14	block_1_chr_14	rs109752439	rs41630614	305780	330256	24476	0.03035	Milk	309278	309282	QTL_ID=102257	trait=Milk_yield	Abbrev=MY	breed=holstein	rs109742701
14	block_1_chr_14	rs109752439	rs41630614	305780	330256	24476	0.03035	Milk	309278	309282	QTL_ID=102702	trait=Milk_fat_yield	Abbrev=FY	breed=simmental,Angus	rs41971371
14	block_1_chr_14	rs109752439	rs41630614	305780	330256	24476	0.03035	Milk	309278	309282	QTL_ID=103369	trait=Milk_protein_yield	Abbrev=PY	breed=holstein	rs41638728,rs81173790,rs42252603
14	block_1_chr_14	rs109752439	rs41630614	305780	330256	24476	0.03035	Milk	309278	309282	QTL_ID=103577	trait=Milk_fat_percentage	Abbrev=FP	breed=charolais,gelbvieh,hereford,limousin,pinzgauer,red_angus,red_poll,simmental,Angus	rs110311677
14	block_1_chr_14	rs109752439	rs41630614	305780	330256	24476	0.03035	Milk	309278	309282	QTL_ID=104794	trait=Milk_protein_percentage	Abbrev=PP	breed=holstein	rs29019877
14	block_1_chr_14	rs109752439	rs41630614	305780	330256	24476	0.03035	Milk	309278	309282	QTL_ID=33410	trait=Milk_fat_percentage	Abbrev=FP	breed=ayrshire,danish_red,Swedish_Red-and-White	rs41724391
14	block_1_chr_14	rs109752439	rs41630614	305780	330256	24476	0.03035	Milk	309278	309282	QTL_ID=64285	trait=Milk_riboflavin_content	Abbrev=RIBO	breed=holstein	rs41724388
14	block_1_chr_14	rs109752439	rs41630614	305780	330256	24476	0.03035	Milk	310316	310320	QTL_ID=35122	trait=Milk_yield	Abbrev=MY	breed=ayrshire,danish_red,Swedish_Red-and-White	rs41724397
14	block_1_chr_14	rs109752439	rs41630614	305780	330256	24476	0.03035	Milk	310316	310320	QTL_ID=35123	trait=Milk_protein_yield	Abbrev=PY	breed=ayrshire,danish_red,Swedish_Red-and-White	rs41724398
14	block_1_chr_14	rs109752439	rs41630614	305780	330256	24476	0.03035	Milk	310316	310320	QTL_ID=35124	trait=Milk_fat_percentage	Abbrev=FP	breed=ayrshire,danish_red,Swedish_Red-and-White	rs41724399
14	block_1_chr_14	rs109752439	rs41630614	305780	330256	24476	0.03035	Milk	310316	310320	QTL_ID=35125	trait=Milk_protein_percentage	Abbrev=PP	breed=ayrshire,danish_red,Swedish_Red-and-White	rs41724398
14	block_1_chr_14	rs109752439	rs41630614	305780	330256	24476	0.03035	Milk	310759	310763	QTL_ID=102258	trait=Milk_yield	Abbrev=MY	breed=holstein	rs43714156
14	block_1_chr_14	rs109752439	rs41630614	305780	330256	24476	0.03035	Milk	310759	310763	QTL_ID=102703	trait=Milk_fat_yield	Abbrev=FY	breed=ayrshire,danish_red,Swedish_Red-and-White	rs110956939
14	block_1_chr_14	rs109752439	rs41630614	305780	330256	24476	0.03035	Milk	310759	310763	QTL_ID=103370	trait=Milk_protein_yield	Abbrev=PY	breed=holstein	rs110397182
14	block_1_chr_14	rs109752439	rs41630614	305780	330256	24476	0.03035	Milk	310759	310763	QTL_ID=103578	trait=Milk_fat_percentage	Abbrev=FP	breed=Angus	rs110311677
14	block_1_chr_14	rs109752439	rs41630614	305780	330256	24476	0.03035	Milk	310759	310763	QTL_ID=104795	trait=Milk_protein_percentage	Abbrev=PP	breed=holstein	rs29019877
14	block_1_chr_14	rs109752439	rs41630614	305780	330256	24476	0.03035	Milk	310759	310763	QTL_ID=33411	trait=Milk_fat_percentage	Abbrev=FP	breed=ayrshire,danish_red,Swedish_Red-and-White	rs41724392
14	block_1_chr_14	rs109752439	rs41630614	305780	330256	24476	0.03035	Milk	310759	310763	QTL_ID=64286	trait=Milk_riboflavin_content	Abbrev=RIBO	breed=holstein	rs136853471
14	block_1_chr_14	rs109752439	rs41630614	305780	330256	24476	0.03035	Milk	311871	311875	QTL_ID=96754	trait=Milk_yield	Abbrev=MY	breed=ayrshire,danish_red,Swedish_Red-and-White	rs109798166
14	block_1_chr_14	rs109752439	rs41630614	305780	330256	24476	0.03035	Milk	311871	311875	QTL_ID=97750	trait=Milk_fat_yield	Abbrev=FY	breed=ayrshire,danish_red,Swedish_Red-and-White	rs136010625
14	block_1_chr_14	rs109752439	rs41630614	305780	330256	24476	0.03035	Milk	313573	313577	QTL_ID=102259	trait=Milk_yield	Abbrev=MY	breed=holstein	rs133320887
14	block_1_chr_14	rs109752439	rs41630614	305780	330256	24476	0.03035	Milk	313573	313577	QTL_ID=102704	trait=Milk_fat_yield	Abbrev=FY	breed=ayrshire,danish_red,Swedish_Red-and-White	rs134395992
14	block_1_chr_14	rs109752439	rs41630614	305780	330256	24476	0.03035	Milk	313573	313577	QTL_ID=103371	trait=Milk_protein_yield	Abbrev=PY	breed=holstein	BM719
14	block_1_chr_14	rs109752439	rs41630614	305780	330256	24476	0.03035	Milk	313573	313577	QTL_ID=103579	trait=Milk_fat_percentage	Abbrev=FP	breed=charolais,holstein	rs110311677
14	block_1_chr_14	rs109752439	rs41630614	305780	330256	24476	0.03035	Milk	313573	313577	QTL_ID=104796	trait=Milk_protein_percentage	Abbrev=PP	breed=charolais,gelbvieh,hereford,limousin,pinzgauer,red_angus,red_poll,simmental,Angus	rs29019877
14	block_1_chr_14	rs109752439	rs41630614	305780	330256	24476	0.03035	Milk	313573	313577	QTL_ID=33412	trait=Milk_fat_percentage	Abbrev=FP	breed=ayrshire,danish_red,Swedish_Red-and-White	rs41724402
14	block_1_chr_14	rs109752439	rs41630614	305780	330256	24476	0.03035	Milk	313573	313577	QTL_ID=64287	trait=Milk_riboflavin_content	Abbrev=RIBO	breed=ayrshire,danish_red,Swedish_Red-and-White	rs41724402
14	block_1_chr_14	rs109752439	rs41630614	305780	330256	24476	0.03035	Milk	315496	315500	QTL_ID=97056	trait=Milk_yield	Abbrev=MY	breed=dutch_friesian	rs109610449
14	block_1_chr_14	rs109752439	rs41630614	305780	330256	24476	0.03035	Milk	315496	315500	QTL_ID=97753	trait=Milk_fat_yield	Abbrev=FY	breed=ayrshire,danish_red,Swedish_Red-and-White	rs137269124
14	block_1_chr_14	rs109752439	rs41630614	305780	330256	24476	0.03035	Milk	320717	320721	QTL_ID=102260	trait=Milk_yield	Abbrev=MY	breed=holstein	rs41635148
14	block_1_chr_14	rs109752439	rs41630614	305780	330256	24476	0.03035	Milk	320717	320721	QTL_ID=102705	trait=Milk_fat_yield	Abbrev=FY	breed=ayrshire,danish_red,Swedish_Red-and-White	rs134395992
14	block_1_chr_14	rs109752439	rs41630614	305780	330256	24476	0.03035	Milk	320717	320721	QTL_ID=103372	trait=Milk_protein_yield	Abbrev=PY	breed=holstein	BM719
14	block_1_chr_14	rs109752439	rs41630614	305780	330256	24476	0.03035	Milk	320717	320721	QTL_ID=103580	trait=Milk_fat_percentage	Abbrev=FP	breed=holstein	rs110311677
14	block_1_chr_14	rs109752439	rs41630614	305780	330256	24476	0.03035	Milk	320717	320721	QTL_ID=104797	trait=Milk_protein_percentage	Abbrev=PP	breed=holstein	rs29019877
14	block_1_chr_14	rs109752439	rs41630614	305780	330256	24476	0.03035	Milk	320717	320721	QTL_ID=200511	trait=Milk_palmitic_acid_content	Abbrev=MFA-C16:0	breed=holstein	rs133745374
14	block_1_chr_14	rs109752439	rs41630614	305780	330256	24476	0.03035	Milk	320717	320721	QTL_ID=205688	trait=Milk_palmitoleic_acid_content	Abbrev=MFA-C16:1	breed=holstein	rs109325079
14	block_1_chr_14	rs109752439	rs41630614	305780	330256	24476	0.03035	Milk	320717	320721	QTL_ID=205689	trait=Milk_oleic_acid_content	Abbrev=MFA-C18:1	breed=holstein	rs109325079
14	block_1_chr_14	rs109752439	rs41630614	305780	330256	24476	0.03035	Milk	320717	320721	QTL_ID=205690	trait=Milk_linoleic_acid_content	Abbrev=MFA-C18:2	breed=holstein	rs109325079
14	block_1_chr_14	rs109752439	rs41630614	305780	330256	24476	0.03035	Milk	320717	320721	QTL_ID=205691	trait=Milk_conjugated_linoleic_acid_content	Abbrev=CLAC18:2	breed=holstein	rs109325079
14	block_1_chr_14	rs109752439	rs41630614	305780	330256	24476	0.03035	Milk	320717	320721	QTL_ID=33433	trait=Milk_fat_percentage	Abbrev=FP	breed=ayrshire,danish_red,Swedish_Red-and-White	rs41724405
14	block_1_chr_14	rs109752439	rs41630614	305780	330256	24476	0.03035	Milk	320717	320721	QTL_ID=64288	trait=Milk_riboflavin_content	Abbrev=RIBO	breed=ayrshire,danish_red,Swedish_Red-and-White	rs41724404
14	block_1_chr_14	rs109752439	rs41630614	305780	330256	24476	0.03035	Milk	324498	324502	QTL_ID=35178	trait=Milk_yield	Abbrev=MY	breed=ayrshire,danish_red,Swedish_Red-and-White	rs41724406
14	block_1_chr_14	rs109752439	rs41630614	305780	330256	24476	0.03035	Milk	324498	324502	QTL_ID=35179	trait=Milk_protein_yield	Abbrev=PY	breed=ayrshire,danish_red,Swedish_Red-and-White	rs41724405
14	block_1_chr_14	rs109752439	rs41630614	305780	330256	24476	0.03035	Milk	324498	324502	QTL_ID=35180	trait=Milk_fat_percentage	Abbrev=FP	breed=ayrshire,danish_red,Swedish_Red-and-White	rs41724406
14	block_1_chr_14	rs109752439	rs41630614	305780	330256	24476	0.03035	Milk	325289	325293	QTL_ID=102261	trait=Milk_yield	Abbrev=MY	breed=Wagyu	rs41635148
14	block_1_chr_14	rs109752439	rs41630614	305780	330256	24476	0.03035	Milk	325289	325293	QTL_ID=102706	trait=Milk_fat_yield	Abbrev=FY	breed=ayrshire,danish_red,Swedish_Red-and-White	rs476345002
14	block_1_chr_14	rs109752439	rs41630614	305780	330256	24476	0.03035	Milk	325289	325293	QTL_ID=103373	trait=Milk_protein_yield	Abbrev=PY	breed=Angus	BM719
14	block_1_chr_14	rs109752439	rs41630614	305780	330256	24476	0.03035	Milk	325289	325293	QTL_ID=103581	trait=Milk_fat_percentage	Abbrev=FP	breed=hereford,Angus	rs110311677
14	block_1_chr_14	rs109752439	rs41630614	305780	330256	24476	0.03035	Milk	325289	325293	QTL_ID=104798	trait=Milk_protein_percentage	Abbrev=PP	breed=holstein	rs29019877
14	block_1_chr_14	rs109752439	rs41630614	305780	330256	24476	0.03035	Milk	325289	325293	QTL_ID=200485	trait=Milk_palmitic_acid_content	Abbrev=MFA-C16:0	breed=holstein	rs133745374
14	block_1_chr_14	rs109752439	rs41630614	305780	330256	24476	0.03035	Milk	325289	325293	QTL_ID=205637	trait=Milk_palmitoleic_acid_content	Abbrev=MFA-C16:1	breed=holstein	rs110140569
14	block_1_chr_14	rs109752439	rs41630614	305780	330256	24476	0.03035	Milk	325289	325293	QTL_ID=205638	trait=Milk_oleic_acid_content	Abbrev=MFA-C18:1	breed=holstein	rs110140569
14	block_1_chr_14	rs109752439	rs41630614	305780	330256	24476	0.03035	Milk	325289	325293	QTL_ID=205639	trait=Milk_linoleic_acid_content	Abbrev=MFA-C18:2	breed=holstein	rs110140569
14	block_1_chr_14	rs109752439	rs41630614	305780	330256	24476	0.03035	Milk	325289	325293	QTL_ID=205640	trait=Milk_conjugated_linoleic_acid_content	Abbrev=CLAC18:2	breed=holstein	rs109325079
14	block_1_chr_14	rs109752439	rs41630614	305780	330256	24476	0.03035	Milk	330254	330258	QTL_ID=102256	trait=Milk_yield	Abbrev=MY	breed=holstein	rs135248689
14	block_1_chr_14	rs109752439	rs41630614	305780	330256	24476	0.03035	Milk	330254	330258	QTL_ID=102693	trait=Milk_fat_yield	Abbrev=FY	breed=charolais,gelbvieh,hereford,limousin,pinzgauer,red_angus,red_poll,simmental,Angus	DIK4437,BMS462,BMS462
14	block_1_chr_14	rs109752439	rs41630614	305780	330256	24476	0.03035	Milk	330254	330258	QTL_ID=103382	trait=Milk_protein_yield	Abbrev=PY	breed=holstein	rs42843320
14	block_1_chr_14	rs109752439	rs41630614	305780	330256	24476	0.03035	Milk	330254	330258	QTL_ID=103575	trait=Milk_fat_percentage	Abbrev=FP	breed=jersey	rs110311677
14	block_1_chr_14	rs109752439	rs41630614	305780	330256	24476	0.03035	Milk	330254	330258	QTL_ID=104793	trait=Milk_protein_percentage	Abbrev=PP	breed=brahman	rs29019877
14	block_1_chr_14	rs109752439	rs41630614	305780	330256	24476	0.03035	Milk	330254	330258	QTL_ID=14936	trait=Milk_fat_percentage	Abbrev=FP	breed=holstein	rs109517718
14	block_1_chr_14	rs109752439	rs41630614	305780	330256	24476	0.03035	Milk	330254	330258	QTL_ID=153807	trait=Milk_fat_percentage	Abbrev=FP	breed=brown_swiss	rs42230512
14	block_1_chr_14	rs109752439	rs41630614	305780	330256	24476	0.03035	Milk	330254	330258	QTL_ID=161788	trait=Milk_fat_percentage	Abbrev=FP	breed=brown_swiss	BMS1747,BMS740
14	block_1_chr_14	rs109752439	rs41630614	305780	330256	24476	0.03035	Milk	330254	330258	QTL_ID=166949	trait=Milk_fat_percentage	Abbrev=FP	breed=brown_swiss	rs41833730
14	block_1_chr_14	rs109752439	rs41630614	305780	330256	24476	0.03035	Milk	330254	330258	QTL_ID=173577	trait=Milk_fat_percentage	Abbrev=FP	breed=holstein	rs110828423
14	block_1_chr_14	rs109752439	rs41630614	305780	330256	24476	0.03035	Milk	330254	330258	QTL_ID=174144	trait=Milk_fat_yield	Abbrev=FY	breed=ayrshire,danish_red,Swedish_Red-and-White	rs110543230
14	block_1_chr_14	rs109752439	rs41630614	305780	330256	24476	0.03035	Milk	330254	330258	QTL_ID=174531	trait=Milk_yield	Abbrev=MY	breed=holstein	rs110057993
14	block_1_chr_14	rs109752439	rs41630614	305780	330256	24476	0.03035	Milk	330254	330258	QTL_ID=174925	trait=Milk_protein_percentage	Abbrev=PP	breed=ayrshire,danish_red,Swedish_Red-and-White	rs41661929,rs41612309
14	block_1_chr_14	rs109752439	rs41630614	305780	330256	24476	0.03035	Milk	330254	330258	QTL_ID=175500	trait=Milk_protein_yield	Abbrev=PY	breed=brown_swiss	rs137269124,rs42410442
14	block_1_chr_14	rs109752439	rs41630614	305780	330256	24476	0.03035	Milk	330254	330258	QTL_ID=203588	trait=Milk_palmitic_acid_content	Abbrev=MFA-C16:0	breed=holstein	rs109410010
14	block_1_chr_14	rs109752439	rs41630614	305780	330256	24476	0.03035	Milk	330254	330258	QTL_ID=210058	trait=Milk_palmitoleic_acid_content	Abbrev=MFA-C16:1	breed=holstein	rs110319408
14	block_1_chr_14	rs109752439	rs41630614	305780	330256	24476	0.03035	Milk	330254	330258	QTL_ID=210059	trait=Milk_oleic_acid_content	Abbrev=MFA-C18:1	breed=holstein	rs110319408
14	block_1_chr_14	rs109752439	rs41630614	305780	330256	24476	0.03035	Milk	330254	330258	QTL_ID=210060	trait=Milk_linoleic_acid_content	Abbrev=MFA-C18:2	breed=holstein	rs109410010
14	block_1_chr_14	rs109752439	rs41630614	305780	330256	24476	0.03035	Milk	330254	330258	QTL_ID=210061	trait=Milk_conjugated_linoleic_acid_content	Abbrev=CLAC18:2	breed=holstein	rs110319408
14	block_1_chr_14	rs109752439	rs41630614	305780	330256	24476	0.03035	Milk	330254	330258	QTL_ID=25923	trait=Milk_fat_yield	Abbrev=FY	breed=holstein	rs41986867
14	block_1_chr_14	rs109752439	rs41630614	305780	330256	24476	0.03035	Milk	330254	330258	QTL_ID=26530	trait=Milk_fat_percentage	Abbrev=FP	breed=holstein	rs41788288
14	block_1_chr_14	rs109752439	rs41630614	305780	330256	24476	0.03035	Milk	330254	330258	QTL_ID=33413	trait=Milk_fat_percentage	Abbrev=FP	breed=ayrshire,danish_red,Swedish_Red-and-White	rs381992093
14	block_1_chr_14	rs109752439	rs41630614	305780	330256	24476	0.03035	Milk	330254	330258	QTL_ID=35333	trait=Milk_fat_yield	Abbrev=FY	breed=ayrshire,danish_red,Swedish_Red-and-White	rs41723524
14	block_1_chr_14	rs109752439	rs41630614	305780	330256	24476	0.03035	Milk	330254	330258	QTL_ID=35387	trait=Milk_yield	Abbrev=MY	breed=ayrshire,danish_red,Swedish_Red-and-White	rs381992093
14	block_1_chr_14	rs109752439	rs41630614	305780	330256	24476	0.03035	Milk	330254	330258	QTL_ID=35490	trait=Milk_fat_percentage	Abbrev=FP	breed=ayrshire,danish_red,Swedish_Red-and-White	rs41723524
14	block_1_chr_14	rs109752439	rs41630614	305780	330256	24476	0.03035	Milk	330254	330258	QTL_ID=64289	trait=Milk_riboflavin_content	Abbrev=RIBO	breed=ayrshire,danish_red,Swedish_Red-and-White	rs41723528
14	block_1_chr_14	rs109752439	rs41630614	305780	330256	24476	0.03035	Milk	330254	330258	QTL_ID=95652	trait=Milk_fat_percentage	Abbrev=FP	breed=ayrshire,danish_red,Swedish_Red-and-White	rs137425866
14	block_1_chr_14	rs109752439	rs41630614	305780	330256	24476	0.03035	Milk	.	.	QTL_ID=97255	trait=Milk_yield	Abbrev=MY	breed=holstein	rs109752439
14	block_1_chr_14	rs109752439	rs41630614	305780	330256	24476	0.03035	Milk	.	.	QTL_ID=97399	trait=Milk_yield	Abbrev=MY	breed=holstein	rs109752439
14	block_1_chr_14	rs109752439	rs41630614	305780	330256	24476	0.03035	Milk	.	.	QTL_ID=98246	trait=Milk_fat_yield	Abbrev=FY	breed=jersey	rs41630614
14	block_1_chr_14	rs109752439	rs41630614	305780	330256	24476	0.03035	Reproduction	330254	330258	QTL_ID=212769	trait=Inseminations_per_conception	Abbrev=CONCEPT	breed=brown_swiss	rs29021886
14	block_77_chr_14	rs110981704	rs109929438	9063069	9098173	35104	0.03521	Milk	9063067	9063071	QTL_ID=104414	trait=Milk_fat_percentage	Abbrev=FP	breed=holstein	IDVGA69,IDVGA69,INRA048
14	block_77_chr_14	rs110981704	rs109929438	9063069	9098173	35104	0.03521	Milk	9063067	9063071	QTL_ID=207606	trait=Milk_palmitoleic_acid_content	Abbrev=MFA-C16:1	breed=holstein	rs109021757
14	block_77_chr_14	rs110981704	rs109929438	9063069	9098173	35104	0.03521	Milk	9063067	9063071	QTL_ID=26652	trait=Milk_fat_percentage	Abbrev=FP	breed=holstein	rs110734343
14	block_77_chr_14	rs110981704	rs109929438	9063069	9098173	35104	0.03521	Milk	9063801	9063805	QTL_ID=104415	trait=Milk_fat_percentage	Abbrev=FP	breed=holstein	IDVGA49,IDVGA69,IDVGA69
14	block_77_chr_14	rs110981704	rs109929438	9063069	9098173	35104	0.03521	Milk	9063801	9063805	QTL_ID=207767	trait=Milk_palmitoleic_acid_content	Abbrev=MFA-C16:1	breed=holstein	rs109021757
14	block_77_chr_14	rs110981704	rs109929438	9063069	9098173	35104	0.03521	Milk	9092453	9092457	QTL_ID=209795	trait=Milk_palmitoleic_acid_content	Abbrev=MFA-C16:1	breed=holstein	rs109021757
14	block_77_chr_14	rs110981704	rs109929438	9063069	9098173	35104	0.03521	Milk	9098171	9098175	QTL_ID=25593	trait=Milk_yield	Abbrev=MY	breed=holstein	rs41976563
14	block_77_chr_14	rs110981704	rs109929438	9063069	9098173	35104	0.03521	Milk	9098171	9098175	QTL_ID=26653	trait=Milk_fat_percentage	Abbrev=FP	breed=holstein	rs41255237,rs41255237,rs109428995
14	block_105_chr_14	rs41570832	rs41614771	15454870	15481849	26979	0.03604	Milk	15481847	15481851	QTL_ID=203560	trait=Milk_palmitic_acid_content	Abbrev=MFA-C16:0	breed=holstein	rs110566502
14	block_181_chr_14	rs41737077	rs41737059	30803553	30837616	34063	0.0388	Milk	30837614	30837618	QTL_ID=158047	trait=Milking_speed	Abbrev=MSPD	breed=holstein	rs110571385
14	block_213_chr_14	rs43576496	rs41661153	41944778	41965713	20935	0.05005	Milk	41944776	41944780	QTL_ID=158090	trait=Milking_speed	Abbrev=MSPD	breed=holstein	rs109715014
14	block_213_chr_14	rs43576496	rs41661153	41944778	41965713	20935	0.05005	Milk	41944776	41944780	QTL_ID=175015	trait=Milk_protein_percentage	Abbrev=PP	breed=holstein	rs42311889
15	block_95_chr_15	rs109476941	rs109186885	28279946	28302223	22277	0.03836	Production	28279944	28279948	QTL_ID=68724	trait=Body_weight_(yearling)	Abbrev=W365	breed=holstein	rs135742812
15	block_192_chr_15	rs109476806	rs110276961	51981969	52018352	36383	0.03108	Production	51981967	51981971	QTL_ID=68722	trait=Body_weight_(yearling)	Abbrev=W365	breed=charolais	rs109154988
15	block_192_chr_15	rs109476806	rs110276961	51981969	52018352	36383	0.03108	Production	51981967	51981971	QTL_ID=68723	trait=Body_weight_gain	Abbrev=BWG	breed=Angus	rs109154988
15	block_267_chr_15	rs110384360	rs109853015	74165328	74193545	28217	0.03144	Health	74169952	74169956	QTL_ID=194841	trait=Serotonin_level	Abbrev=5HT	breed=holstein,jersey	rs385624507,rs209506642
15	block_267_chr_15	rs110384360	rs109853015	74165328	74193545	28217	0.03144	Health	74169998	74170002	QTL_ID=194842	trait=Serotonin_level	Abbrev=5HT	breed=holstein,jersey	rs385624507,rs209506642
15	block_267_chr_15	rs110384360	rs109853015	74165328	74193545	28217	0.03144	Health	74182967	74182971	QTL_ID=194843	trait=Serotonin_level	Abbrev=5HT	breed=holstein,jersey	rs211163021,rs209975092
15	block_267_chr_15	rs110384360	rs109853015	74165328	74193545	28217	0.03144	Health	74186547	74186551	QTL_ID=194844	trait=Serotonin_level	Abbrev=5HT	breed=holstein,jersey	rs211163021,rs209975092
15	block_267_chr_15	rs110384360	rs109853015	74165328	74193545	28217	0.03144	Reproduction	74165870	74165874	QTL_ID=176431	trait=Conception_rate	Abbrev=CONCRATE	breed=holstein	rs110897904
16	block_156_chr_16	rs41811813	rs109608399	41217175	41244707	27532	0.04103	Milk	41244705	41244709	QTL_ID=26014	trait=Milk_fat_yield	Abbrev=FY	breed=norwegian_red	rs109642392
16	block_156_chr_16	rs41811813	rs109608399	41217175	41244707	27532	0.04103	Milk	41244705	41244709	QTL_ID=26377	trait=Milk_protein_yield	Abbrev=PY	breed=norwegian_red	rs133299490
17	block_280_chr_17	rs110389007	rs41657653	66445449	66473136	27687	0.03341	Exterior	66473134	66473138	QTL_ID=49418	trait=Foot_angle	Abbrev=FANG	breed=holstein	rs109704548,rs109836032,rs109731241
17	block_280_chr_17	rs110389007	rs41657653	66445449	66473136	27687	0.03341	Exterior	66473134	66473138	QTL_ID=49426	trait=Udder_depth	Abbrev=UDPTH	breed=holstein	rs207783265,rs41912291
17	block_280_chr_17	rs110389007	rs41657653	66445449	66473136	27687	0.03341	Health	66473134	66473138	QTL_ID=49424	trait=Somatic_cell_score	Abbrev=SCS	breed=holstein	rs41585763
17	block_280_chr_17	rs110389007	rs41657653	66445449	66473136	27687	0.03341	Milk	66473134	66473138	QTL_ID=49419	trait=Milk_fat_percentage	Abbrev=FP	breed=holstein	rs109704548,rs109836032,rs109731241
17	block_280_chr_17	rs110389007	rs41657653	66445449	66473136	27687	0.03341	Milk	66473134	66473138	QTL_ID=49422	trait=Milk_protein_percentage	Abbrev=PP	breed=holstein	rs109672208
17	block_280_chr_17	rs110389007	rs41657653	66445449	66473136	27687	0.03341	Production	66473134	66473138	QTL_ID=49420	trait=Net_merit	Abbrev=NM	breed=holstein	rs109704548,rs109836032,rs109731241
17	block_280_chr_17	rs110389007	rs41657653	66445449	66473136	27687	0.03341	Production	66473134	66473138	QTL_ID=49421	trait=Length_of_productive_life	Abbrev=PL	breed=holstein	BM17132
17	block_280_chr_17	rs110389007	rs41657653	66445449	66473136	27687	0.03341	Production	66473134	66473138	QTL_ID=68916	trait=Body_weight_(yearling)	Abbrev=W365	breed=holstein	rs42882095
17	block_280_chr_17	rs110389007	rs41657653	66445449	66473136	27687	0.03341	Production	66473134	66473138	QTL_ID=68917	trait=Body_weight_(yearling)	Abbrev=W365	breed=holstein	rs111012181
17	block_280_chr_17	rs110389007	rs41657653	66445449	66473136	27687	0.03341	Reproduction	66465446	66465450	QTL_ID=142283	trait=Non-return_rate	Abbrev=NRR	breed=nelore	rs42882095
17	block_280_chr_17	rs110389007	rs41657653	66445449	66473136	27687	0.03341	Reproduction	66469996	66470000	QTL_ID=142268	trait=Non-return_rate	Abbrev=NRR	breed=holstein	rs109889052
17	block_280_chr_17	rs110389007	rs41657653	66445449	66473136	27687	0.03341	Reproduction	66473134	66473138	QTL_ID=49416	trait=Calving_ease_(maternal)	Abbrev=CALEASE	breed=Angus	rs109704548,rs109836032,rs109731241
17	block_280_chr_17	rs110389007	rs41657653	66445449	66473136	27687	0.03341	Reproduction	66473134	66473138	QTL_ID=49417	trait=Daughter_pregnancy_rate	Abbrev=DPR	breed=holstein	rs109704548,rs109836032,rs109731241
17	block_280_chr_17	rs110389007	rs41657653	66445449	66473136	27687	0.03341	Reproduction	66473134	66473138	QTL_ID=49423	trait=Calving_ease	Abbrev=CALEASE	breed=Angus	rs41585763
17	block_280_chr_17	rs110389007	rs41657653	66445449	66473136	27687	0.03341	Reproduction	66473134	66473138	QTL_ID=49425	trait=Stillbirth	Abbrev=SB	breed=holstein	rs108976591
18	block_6_chr_18	rs110151403	rs109766638	2132264	2159912	27648	0.07072	Exterior	2159910	2159914	QTL_ID=49435	trait=Foot_angle	Abbrev=FANG	breed=brown_swiss	rs110423515
18	block_6_chr_18	rs110151403	rs109766638	2132264	2159912	27648	0.07072	Exterior	2159910	2159914	QTL_ID=49436	trait=Feet_and_leg_conformation	Abbrev=FTLEG	breed=brown_swiss	rs41653204
18	block_6_chr_18	rs110151403	rs109766638	2132264	2159912	27648	0.07072	Exterior	2159910	2159914	QTL_ID=49439	trait=Udder_attachment	Abbrev=UA	breed=brown_swiss	rs111007616
18	block_6_chr_18	rs110151403	rs109766638	2132264	2159912	27648	0.07072	Exterior	2159910	2159914	QTL_ID=49445	trait=Rear_leg_placement_-_rear_view	Abbrev=RLEGR	breed=brown_swiss	rs41923843
18	block_6_chr_18	rs110151403	rs109766638	2132264	2159912	27648	0.07072	Exterior	2159910	2159914	QTL_ID=49446	trait=Rear_leg_placement_-_side_view	Abbrev=RLEGS	breed=brown_swiss	rs41924637
18	block_6_chr_18	rs110151403	rs109766638	2132264	2159912	27648	0.07072	Exterior	2159910	2159914	QTL_ID=49449	trait=Strength	Abbrev=STR	breed=brown_swiss	rs441811558
18	block_6_chr_18	rs110151403	rs109766638	2132264	2159912	27648	0.07072	Exterior	2159910	2159914	QTL_ID=49450	trait=Udder_depth	Abbrev=UDPTH	breed=brown_swiss	rs109195501
18	block_6_chr_18	rs110151403	rs109766638	2132264	2159912	27648	0.07072	Milk	2159910	2159914	QTL_ID=49437	trait=Milk_fat_percentage	Abbrev=FP	breed=brown_swiss	rs109603247
18	block_6_chr_18	rs110151403	rs109766638	2132264	2159912	27648	0.07072	Milk	2159910	2159914	QTL_ID=49440	trait=Milk_fat_yield	Abbrev=FY	breed=brown_swiss	rs386089602,rs380102255,rs384012411
18	block_6_chr_18	rs110151403	rs109766638	2132264	2159912	27648	0.07072	Milk	2159910	2159914	QTL_ID=49443	trait=Milk_protein_percentage	Abbrev=PP	breed=brown_swiss	rs134785404
18	block_6_chr_18	rs110151403	rs109766638	2132264	2159912	27648	0.07072	Milk	2159910	2159914	QTL_ID=49444	trait=Milk_protein_yield	Abbrev=PY	breed=brown_swiss	rs41923838
18	block_6_chr_18	rs110151403	rs109766638	2132264	2159912	27648	0.07072	Production	2159910	2159914	QTL_ID=49438	trait=PTA_type	Abbrev=PTAT	breed=brown_swiss	rs109603247
18	block_6_chr_18	rs110151403	rs109766638	2132264	2159912	27648	0.07072	Production	2159910	2159914	QTL_ID=49441	trait=Net_merit	Abbrev=NM	breed=brown_swiss	rs380102255
18	block_6_chr_18	rs110151403	rs109766638	2132264	2159912	27648	0.07072	Production	2159910	2159914	QTL_ID=49442	trait=Length_of_productive_life	Abbrev=PL	breed=brown_swiss	rs110523614
18	block_6_chr_18	rs110151403	rs109766638	2132264	2159912	27648	0.07072	Reproduction	2132262	2132266	QTL_ID=106866	trait=Conception_rate	Abbrev=CONCRATE	breed=brown_swiss	rs109623709
18	block_6_chr_18	rs110151403	rs109766638	2132264	2159912	27648	0.07072	Reproduction	2159910	2159914	QTL_ID=49434	trait=Calving_ease_(maternal)	Abbrev=CALEASE	breed=brown_swiss	rs110805991
18	block_6_chr_18	rs110151403	rs109766638	2132264	2159912	27648	0.07072	Reproduction	2159910	2159914	QTL_ID=49447	trait=Calving_ease	Abbrev=CALEASE	breed=brown_swiss	rs801239373,rs41923848,rs1116256555
18	block_6_chr_18	rs110151403	rs109766638	2132264	2159912	27648	0.07072	Reproduction	2159910	2159914	QTL_ID=49448	trait=Stillbirth	Abbrev=SB	breed=brown_swiss	rs801239373,rs41923848,rs1116256555
18	block_172_chr_18	rs109074834	rs41581635	43300251	43332104	31853	0.04583	Exterior	43332102	43332106	QTL_ID=49619	trait=Dairy_form	Abbrev=DYF	breed=holstein	rs41946281
18	block_172_chr_18	rs109074834	rs41581635	43300251	43332104	31853	0.04583	Exterior	43332102	43332106	QTL_ID=49627	trait=Udder_depth	Abbrev=UDPTH	breed=holstein	rs29013720
18	block_172_chr_18	rs109074834	rs41581635	43300251	43332104	31853	0.04583	Health	43332102	43332106	QTL_ID=49625	trait=Somatic_cell_score	Abbrev=SCS	breed=holstein	rs41939408
18	block_172_chr_18	rs109074834	rs41581635	43300251	43332104	31853	0.04583	Production	43316321	43316325	QTL_ID=193757	trait=Body_weight_(birth)	Abbrev=BW	breed=holstein	rs29022980
18	block_172_chr_18	rs109074834	rs41581635	43300251	43332104	31853	0.04583	Production	43332102	43332106	QTL_ID=49622	trait=Net_merit	Abbrev=NM	breed=holstein	rs41939339
18	block_172_chr_18	rs109074834	rs41581635	43300251	43332104	31853	0.04583	Production	43332102	43332106	QTL_ID=49623	trait=Length_of_productive_life	Abbrev=PL	breed=holstein	rs41939374
18	block_172_chr_18	rs109074834	rs41581635	43300251	43332104	31853	0.04583	Reproduction	43332102	43332106	QTL_ID=49618	trait=Calving_ease_(maternal)	Abbrev=CALEASE	breed=holstein	rs136249812
18	block_172_chr_18	rs109074834	rs41581635	43300251	43332104	31853	0.04583	Reproduction	43332102	43332106	QTL_ID=49620	trait=Daughter_pregnancy_rate	Abbrev=DPR	breed=holstein	rs137431035
18	block_172_chr_18	rs109074834	rs41581635	43300251	43332104	31853	0.04583	Reproduction	43332102	43332106	QTL_ID=49621	trait=Stillbirth_(maternal)	Abbrev=SB	breed=holstein	rs41938472
18	block_172_chr_18	rs109074834	rs41581635	43300251	43332104	31853	0.04583	Reproduction	43332102	43332106	QTL_ID=49624	trait=Calving_ease	Abbrev=CALEASE	breed=holstein	rs135627903
18	block_172_chr_18	rs109074834	rs41581635	43300251	43332104	31853	0.04583	Reproduction	43332102	43332106	QTL_ID=49626	trait=Stillbirth	Abbrev=SB	breed=holstein	rs136460340
19	block_16_chr_19	rs29021008	rs41584906	7224772	7250802	26030	0.02769	Exterior	7224770	7224774	QTL_ID=50007	trait=Foot_angle	Abbrev=FANG	breed=holstein	rs109014309
19	block_16_chr_19	rs29021008	rs41584906	7224772	7250802	26030	0.02769	Exterior	7224770	7224774	QTL_ID=50008	trait=Feet_and_leg_conformation	Abbrev=FTLEG	breed=holstein	rs109014309
19	block_16_chr_19	rs29021008	rs41584906	7224772	7250802	26030	0.02769	Exterior	7224770	7224774	QTL_ID=50011	trait=Udder_attachment	Abbrev=UA	breed=holstein	rs42276093
19	block_16_chr_19	rs29021008	rs41584906	7224772	7250802	26030	0.02769	Exterior	7224770	7224774	QTL_ID=50017	trait=Rear_leg_placement_-_side_view	Abbrev=RLEGS	breed=holstein	rs133476228
19	block_16_chr_19	rs29021008	rs41584906	7224772	7250802	26030	0.02769	Exterior	7224770	7224774	QTL_ID=50021	trait=Stature	Abbrev=STA	breed=holstein	rs110775244
19	block_16_chr_19	rs29021008	rs41584906	7224772	7250802	26030	0.02769	Exterior	7224770	7224774	QTL_ID=50022	trait=Strength	Abbrev=STR	breed=holstein	TGLA126,BM713
19	block_16_chr_19	rs29021008	rs41584906	7224772	7250802	26030	0.02769	Exterior	7224770	7224774	QTL_ID=50023	trait=Udder_depth	Abbrev=UDPTH	breed=holstein	rs109729965
19	block_16_chr_19	rs29021008	rs41584906	7224772	7250802	26030	0.02769	Health	7224770	7224774	QTL_ID=50019	trait=Somatic_cell_score	Abbrev=SCS	breed=simmental	rs42276093,rs134175348,rs136709579
19	block_16_chr_19	rs29021008	rs41584906	7224772	7250802	26030	0.02769	Milk	7224770	7224774	QTL_ID=50009	trait=Milk_fat_percentage	Abbrev=FP	breed=hereford	rs42276091
19	block_16_chr_19	rs29021008	rs41584906	7224772	7250802	26030	0.02769	Milk	7224770	7224774	QTL_ID=50012	trait=Milk_fat_yield	Abbrev=FY	breed=holstein	TGLA126,DIK015
19	block_16_chr_19	rs29021008	rs41584906	7224772	7250802	26030	0.02769	Milk	7224770	7224774	QTL_ID=50015	trait=Milk_protein_percentage	Abbrev=PP	breed=blonde_d'aquitaine	rs110335228
19	block_16_chr_19	rs29021008	rs41584906	7224772	7250802	26030	0.02769	Milk	7224770	7224774	QTL_ID=50016	trait=Milk_protein_yield	Abbrev=PY	breed=holstein	rs110335228
19	block_16_chr_19	rs29021008	rs41584906	7224772	7250802	26030	0.02769	Milk	7224794	7224798	QTL_ID=20179	trait=Milk_profitability_index	Abbrev=MPIND	breed=holstein	rs110568113
19	block_16_chr_19	rs29021008	rs41584906	7224772	7250802	26030	0.02769	Milk	7224794	7224798	QTL_ID=20180	trait=Milk_protein_percentage	Abbrev=PP	breed=holstein	rs136942861
19	block_16_chr_19	rs29021008	rs41584906	7224772	7250802	26030	0.02769	Milk	7250800	7250804	QTL_ID=31084	trait=Milk_yield	Abbrev=MY	breed=holstein	rs135188121
19	block_16_chr_19	rs29021008	rs41584906	7224772	7250802	26030	0.02769	Production	7224770	7224774	QTL_ID=50004	trait=Body_depth	Abbrev=BD	breed=holstein	rs109014309
19	block_16_chr_19	rs29021008	rs41584906	7224772	7250802	26030	0.02769	Production	7224770	7224774	QTL_ID=50010	trait=PTA_type	Abbrev=PTAT	breed=holstein	rs42276093
19	block_16_chr_19	rs29021008	rs41584906	7224772	7250802	26030	0.02769	Production	7224770	7224774	QTL_ID=50013	trait=Net_merit	Abbrev=NM	breed=holstein	rs42460720
19	block_16_chr_19	rs29021008	rs41584906	7224772	7250802	26030	0.02769	Production	7224770	7224774	QTL_ID=50014	trait=Length_of_productive_life	Abbrev=PL	breed=brahman	rs110335228
19	block_16_chr_19	rs29021008	rs41584906	7224772	7250802	26030	0.02769	Reproduction	7224770	7224774	QTL_ID=50005	trait=Calving_ease_(maternal)	Abbrev=CALEASE	breed=holstein	rs109014309
19	block_16_chr_19	rs29021008	rs41584906	7224772	7250802	26030	0.02769	Reproduction	7224770	7224774	QTL_ID=50006	trait=Daughter_pregnancy_rate	Abbrev=DPR	breed=holstein	rs109014309
19	block_16_chr_19	rs29021008	rs41584906	7224772	7250802	26030	0.02769	Reproduction	7224770	7224774	QTL_ID=50018	trait=Calving_ease	Abbrev=CALEASE	breed=simmental	rs110897405
19	block_16_chr_19	rs29021008	rs41584906	7224772	7250802	26030	0.02769	Reproduction	7224770	7224774	QTL_ID=50020	trait=Stillbirth	Abbrev=SB	breed=holstein	rs42460657
19	block_62_chr_19	rs41641514	rs110825575	18650667	18683330	32663	0.03112	Milk	18650665	18650669	QTL_ID=26034	trait=Milk_fat_yield	Abbrev=FY	breed=brahman	rs41639261
19	block_62_chr_19	rs41641514	rs110825575	18650667	18683330	32663	0.03112	Milk	18650665	18650669	QTL_ID=26400	trait=Milk_protein_yield	Abbrev=PY	breed=charolais,gelbvieh,hereford,limousin,pinzgauer,red_angus,red_poll,simmental,Angus	rs41639261
19	rs109796698_19_chr_	rs109796698	rs109796698	31862344	31862344	1	0.04262	Reproduction	31862342	31862346	QTL_ID=15493	trait=Gestation_length	Abbrev=GLENGTH	breed=holstein	rs110811379
19	rs109796698_19_chr_	rs109796698	rs109796698	31862344	31862344	1	0.04262	Reproduction	31862342	31862346	QTL_ID=15494	trait=Gestation_length	Abbrev=GLENGTH	breed=holstein	rs41948991
19	block_159_chr_19	rs43729464	rs29015754	41594056	41619572	25516	0.05875	Milk	41594054	41594058	QTL_ID=200165	trait=Milk_myristic_acid_content	Abbrev=MFA-C14:0	breed=ayrshire,danish_red,Swedish_Red-and-White	rs133794351
20	rs43350564_20_chr_	rs43350564	rs43350564	4709731	4709731	1	0.04894	Exterior	4709729	4709733	QTL_ID=50404	trait=Feet_and_leg_conformation	Abbrev=FTLEG	breed=holstein	rs136574946
20	rs43350564_20_chr_	rs43350564	rs43350564	4709731	4709731	1	0.04894	Exterior	4709729	4709733	QTL_ID=50406	trait=Teat_placement_-_front	Abbrev=FTPL	breed=holstein	rs132888075
20	rs43350564_20_chr_	rs43350564	rs43350564	4709731	4709731	1	0.04894	Exterior	4709729	4709733	QTL_ID=50407	trait=Udder_attachment	Abbrev=UA	breed=holstein	rs135995007
20	rs43350564_20_chr_	rs43350564	rs43350564	4709731	4709731	1	0.04894	Exterior	4709729	4709733	QTL_ID=50409	trait=Teat_placement_-_rear	Abbrev=RTPL	breed=holstein	rs134340615
20	rs43350564_20_chr_	rs43350564	rs43350564	4709731	4709731	1	0.04894	Exterior	4709729	4709733	QTL_ID=50413	trait=Stature	Abbrev=STA	breed=braunvieh,holstein,jersey,normande,norwegian_red,Fleckvieh,MontbÃ©liarde,Australian_Red	rs135416871
20	rs43350564_20_chr_	rs43350564	rs43350564	4709731	4709731	1	0.04894	Exterior	4709729	4709733	QTL_ID=50414	trait=Strength	Abbrev=STR	breed=holstein	rs133457830
20	rs43350564_20_chr_	rs43350564	rs43350564	4709731	4709731	1	0.04894	Exterior	4709729	4709733	QTL_ID=50415	trait=Teat_length	Abbrev=TLGTH	breed=jersey	rs135208296
20	rs43350564_20_chr_	rs43350564	rs43350564	4709731	4709731	1	0.04894	Exterior	4709729	4709733	QTL_ID=50416	trait=Udder_cleft	Abbrev=UC	breed=holstein	rs132852832
20	rs43350564_20_chr_	rs43350564	rs43350564	4709731	4709731	1	0.04894	Exterior	4709729	4709733	QTL_ID=50417	trait=Udder_depth	Abbrev=UDPTH	breed=holstein	rs134471789
20	rs43350564_20_chr_	rs43350564	rs43350564	4709731	4709731	1	0.04894	Health	4709729	4709733	QTL_ID=50412	trait=Somatic_cell_score	Abbrev=SCS	breed=holstein	rs211333797
20	rs43350564_20_chr_	rs43350564	rs43350564	4709731	4709731	1	0.04894	Production	4709729	4709733	QTL_ID=164127	trait=Body_weight_(weaning)	Abbrev=WWT	breed=holstein	rs385551988
20	rs43350564_20_chr_	rs43350564	rs43350564	4709731	4709731	1	0.04894	Production	4709729	4709733	QTL_ID=164206	trait=Body_weight_(yearling)	Abbrev=W365	breed=jersey	rs136073509
20	rs43350564_20_chr_	rs43350564	rs43350564	4709731	4709731	1	0.04894	Production	4709729	4709733	QTL_ID=164416	trait=Body_weight_(birth)	Abbrev=BW	breed=jersey	rs209178266
20	rs43350564_20_chr_	rs43350564	rs43350564	4709731	4709731	1	0.04894	Production	4709729	4709733	QTL_ID=164436	trait=Body_weight_(weaning)	Abbrev=WWT	breed=Angus	rs136638907
20	rs43350564_20_chr_	rs43350564	rs43350564	4709731	4709731	1	0.04894	Production	4709729	4709733	QTL_ID=164476	trait=Average_daily_gain	Abbrev=ADG	breed=holstein	rs379843779
20	rs43350564_20_chr_	rs43350564	rs43350564	4709731	4709731	1	0.04894	Production	4709729	4709733	QTL_ID=164535	trait=Body_weight_(yearling)	Abbrev=W365	breed=jersey	rs379127502
20	rs43350564_20_chr_	rs43350564	rs43350564	4709731	4709731	1	0.04894	Production	4709729	4709733	QTL_ID=176528	trait=Body_weight_(birth)	Abbrev=BW	breed=holstein	rs110354299
20	rs43350564_20_chr_	rs43350564	rs43350564	4709731	4709731	1	0.04894	Production	4709729	4709733	QTL_ID=186241	trait=Average_daily_gain	Abbrev=ADG	breed=holstein	rs133774342
20	rs43350564_20_chr_	rs43350564	rs43350564	4709731	4709731	1	0.04894	Production	4709729	4709733	QTL_ID=190174	trait=Metabolic_body_weight	Abbrev=MBW	breed=holstein	rs133204718
20	rs43350564_20_chr_	rs43350564	rs43350564	4709731	4709731	1	0.04894	Production	4709729	4709733	QTL_ID=50405	trait=PTA_type	Abbrev=PTAT	breed=holstein	rs137420632
20	rs43350564_20_chr_	rs43350564	rs43350564	4709731	4709731	1	0.04894	Production	4709729	4709733	QTL_ID=50408	trait=Length_of_productive_life	Abbrev=PL	breed=holstein	rs209318724
20	rs43350564_20_chr_	rs43350564	rs43350564	4709731	4709731	1	0.04894	Production	4709729	4709733	QTL_ID=50410	trait=Rump_width	Abbrev=RUMWD	breed=holstein	rs137010570
20	rs43350564_20_chr_	rs43350564	rs43350564	4709731	4709731	1	0.04894	Production	4709729	4709733	QTL_ID=66693	trait=Body_weight_(birth)	Abbrev=BW	breed=holstein	rs135280215
20	rs43350564_20_chr_	rs43350564	rs43350564	4709731	4709731	1	0.04894	Reproduction	4709729	4709733	QTL_ID=50403	trait=Calving_ease_(maternal)	Abbrev=CALEASE	breed=nelore	rs134074459
20	rs43350564_20_chr_	rs43350564	rs43350564	4709731	4709731	1	0.04894	Reproduction	4709729	4709733	QTL_ID=50411	trait=Calving_ease	Abbrev=CALEASE	breed=holstein	rs384903793
20	block_97_chr_20	rs110998077	rs109446323	24840568	24862047	21479	0.03496	Milk	24862045	24862049	QTL_ID=26862	trait=Milk_protein_percentage	Abbrev=PP	breed=brown_swiss	rs136295413,rs41980878
20	block_97_chr_20	rs110998077	rs109446323	24840568	24862047	21479	0.03496	Production	24848929	24848933	QTL_ID=123891	trait=Length_of_productive_life	Abbrev=PL	breed=brown_swiss	rs453542885
20	block_284_chr_20	rs41961327	rs110485953	70084541	70108587	24046	0.03413	Milk	70085747	70085751	QTL_ID=109092	trait=Milk_casein_percentage	Abbrev=MCASP	breed=holstein	rs109343058
20	block_284_chr_20	rs41961327	rs110485953	70084541	70108587	24046	0.03413	Milk	70085747	70085751	QTL_ID=113984	trait=Milk_protein_percentage	Abbrev=PP	breed=Valdostana_Red_Pied	rs109343058
21	block_17_chr_21	rs109605411	rs110755620	7709935	7744661	34726	0.03747	Reproduction	7744659	7744663	QTL_ID=21134	trait=Age_at_puberty	Abbrev=PUBAGE	breed=charolais,gelbvieh,hereford,limousin,pinzgauer,red_angus,red_poll,simmental,Angus	rs133743204
21	block_37_chr_21	rs110152531	rs41574091	11775997	11809040	33043	0.03427	Health	11789195	11789199	QTL_ID=96515	trait=Bovine_tuberculosis_susceptibility	Abbrev=BTBS	breed=holstein	rs134760556
21	block_37_chr_21	rs110152531	rs41574091	11775997	11809040	33043	0.03427	Health	11790063	11790067	QTL_ID=96520	trait=Bovine_tuberculosis_susceptibility	Abbrev=BTBS	breed=holstein	rs137101676
21	rs41639540_21_chr_	rs41639540	rs41639540	17632245	17632245	1	0.02843	Production	17632243	17632247	QTL_ID=69180	trait=Body_weight_(birth)	Abbrev=BW	breed=holstein	rs109450082
21	block_81_chr_21	rs41640669	rs41582924	20568083	20594817	26734	0.03938	Exterior	20594815	20594819	QTL_ID=51092	trait=Foot_angle	Abbrev=FANG	breed=holstein	rs109776183
21	block_81_chr_21	rs41640669	rs41582924	20568083	20594817	26734	0.03938	Exterior	20594815	20594819	QTL_ID=51094	trait=Teat_placement_-_front	Abbrev=FTPL	breed=holstein	rs109776183
21	block_81_chr_21	rs41640669	rs41582924	20568083	20594817	26734	0.03938	Exterior	20594815	20594819	QTL_ID=51099	trait=Strength	Abbrev=STR	breed=holstein	rs459610962
21	block_81_chr_21	rs41640669	rs41582924	20568083	20594817	26734	0.03938	Exterior	20594815	20594819	QTL_ID=51100	trait=Teat_length	Abbrev=TLGTH	breed=holstein	rs381672782
21	block_81_chr_21	rs41640669	rs41582924	20568083	20594817	26734	0.03938	Milk	20568081	20568085	QTL_ID=32664	trait=Milk_saturated_to_unsaturated_fatty_acid_ratio	Abbrev=MSFAUFAR	breed=holstein	rs109515154
21	block_81_chr_21	rs41640669	rs41582924	20568083	20594817	26734	0.03938	Milk	20568081	20568085	QTL_ID=32667	trait=Milk_saturated_fatty_acid_content	Abbrev=MSFA	breed=holstein	rs109515154
21	block_81_chr_21	rs41640669	rs41582924	20568083	20594817	26734	0.03938	Milk	20568081	20568085	QTL_ID=32670	trait=Milk_unsaturated_fatty_acid_content	Abbrev=UFAM	breed=holstein	rs109776183
21	block_81_chr_21	rs41640669	rs41582924	20568083	20594817	26734	0.03938	Milk	20594815	20594819	QTL_ID=158275	trait=Milking_speed	Abbrev=MSPD	breed=holstein	rs446611245
21	block_81_chr_21	rs41640669	rs41582924	20568083	20594817	26734	0.03938	Milk	20594815	20594819	QTL_ID=51093	trait=Milk_fat_percentage	Abbrev=FP	breed=holstein	rs109776183
21	block_81_chr_21	rs41640669	rs41582924	20568083	20594817	26734	0.03938	Milk	20594815	20594819	QTL_ID=51096	trait=Milk_protein_percentage	Abbrev=PP	breed=holstein	rs459610962
21	block_81_chr_21	rs41640669	rs41582924	20568083	20594817	26734	0.03938	Production	20568081	20568085	QTL_ID=69181	trait=Body_weight_(yearling)	Abbrev=W365	breed=holstein,jersey	rs383279466
21	block_81_chr_21	rs41640669	rs41582924	20568083	20594817	26734	0.03938	Production	20594815	20594819	QTL_ID=51095	trait=Net_merit	Abbrev=NM	breed=holstein	rs110961772
21	block_81_chr_21	rs41640669	rs41582924	20568083	20594817	26734	0.03938	Reproduction	20594815	20594819	QTL_ID=51091	trait=Calving_ease_(maternal)	Abbrev=CALEASE	breed=holstein	rs109776183
21	block_81_chr_21	rs41640669	rs41582924	20568083	20594817	26734	0.03938	Reproduction	20594815	20594819	QTL_ID=51097	trait=Calving_ease	Abbrev=CALEASE	breed=holstein	rs381672782
21	block_81_chr_21	rs41640669	rs41582924	20568083	20594817	26734	0.03938	Reproduction	20594815	20594819	QTL_ID=51098	trait=Stillbirth	Abbrev=SB	breed=holstein	rs379448361
21	block_161_chr_21	rs41642949	rs41976813	39629862	39659151	29289	0.0294	Production	39659149	39659153	QTL_ID=23901	trait=Average_daily_gain	Abbrev=ADG	breed=holstein	rs109615702
21	block_161_chr_21	rs41642949	rs41976813	39629862	39659151	29289	0.0294	Reproduction	39659149	39659153	QTL_ID=169875	trait=Sexual_precocity	Abbrev=SPREC	breed=holstein	rs110413614
21	block_232_chr_21	rs41584223	rs109254014	59446046	59483270	37224	0.03082	Milk	59468296	59468300	QTL_ID=125131	trait=Milk_yield	Abbrev=MY	breed=Angus	rs133000690
21	block_232_chr_21	rs41584223	rs109254014	59446046	59483270	37224	0.03082	Milk	59468296	59468300	QTL_ID=125144	trait=Milk_protein_yield	Abbrev=PY	breed=limousin	rs436377373
21	block_232_chr_21	rs41584223	rs109254014	59446046	59483270	37224	0.03082	Milk	59468296	59468300	QTL_ID=125163	trait=Milk_fat_yield	Abbrev=FY	breed=holstein	rs466208194
21	rs29011028_21_chr_	rs29011028	rs29011028	66700229	66700229	1	0.03384	Health	66700227	66700231	QTL_ID=165364	trait=Immunoglobulin_G_level	Abbrev=SIGG	breed=charolais,gelbvieh,hereford,limousin,simmental,Angus	rs135130537
23	block_19_chr_23	rs110708312	rs109793138	4861885	4892090	30205	0.04868	Production	4861883	4861887	QTL_ID=157031	trait=Body_weight_(yearling)	Abbrev=W365	breed=brown_swiss	rs109199086
23	block_19_chr_23	rs110708312	rs109793138	4861885	4892090	30205	0.04868	Production	4892088	4892092	QTL_ID=157030	trait=Body_weight_(yearling)	Abbrev=W365	breed=brown_swiss	rs109176259
23	block_19_chr_23	rs110708312	rs109793138	4861885	4892090	30205	0.04868	Reproduction	4861883	4861887	QTL_ID=14785	trait=Fertility_treatments	Abbrev=FERTRT	breed=ayrshire,danish_red,Swedish_Red-and-White	rs42086574
23	block_59_chr_23	rs109152735	rs109130384	15338295	15367501	29206	0.07917	Production	15338293	15338297	QTL_ID=65985	trait=Body_weight	Abbrev=BW	breed=holstein	rs135126068
23	block_84_chr_23	rs29022431	rs110429667	21294986	21366692	71706	0.03512	Milk	21294984	21294988	QTL_ID=36311	trait=Milk_yield	Abbrev=MY	breed=simmental,Angus	rs211373799,rs209219656
23	block_84_chr_23	rs29022431	rs110429667	21294986	21366692	71706	0.03512	Production	21366690	21366694	QTL_ID=69241	trait=Body_weight_(yearling)	Abbrev=W365	breed=ayrshire,danish_red,Swedish_Red-and-White	rs42112557
24	block_8_chr_24	rs110289935	rs109219465	1657360	1692330	34970	0.0318	Health	1657358	1657362	QTL_ID=19939	trait=Bovine_spongiform_encephalopathy	Abbrev=BSE	breed=charolais,holstein	rs132698245
24	block_10_chr_24	rs41668379	rs42570102	1921310	1940886	19576	0.04326	Exterior	1921308	1921312	QTL_ID=28176	trait=Udder_structure	Abbrev=udder	breed=charolais,chianina,gelbvieh,hereford,holstein,limousin,piedmontese,red_angus,simmental,Angus,Maine-Anjou	rs110375792
24	block_10_chr_24	rs41668379	rs42570102	1921310	1940886	19576	0.04326	Exterior	1940884	1940888	QTL_ID=52253	trait=Dairy_form	Abbrev=DYF	breed=ayrshire,danish_red,Swedish_Red-and-White	rs136788107
24	block_10_chr_24	rs41668379	rs42570102	1921310	1940886	19576	0.04326	Exterior	1940884	1940888	QTL_ID=52255	trait=Foot_angle	Abbrev=FANG	breed=Angus	rs136788107
24	block_10_chr_24	rs41668379	rs42570102	1921310	1940886	19576	0.04326	Exterior	1940884	1940888	QTL_ID=52259	trait=Rear_leg_placement_-_side_view	Abbrev=RLEGS	breed=holstein	rs133899835
24	block_10_chr_24	rs41668379	rs42570102	1921310	1940886	19576	0.04326	Milk	1921308	1921312	QTL_ID=32336	trait=Milk_conjugated_linoleic_acid_content	Abbrev=CLAC18:2	breed=charolais,chianina,gelbvieh,hereford,holstein,limousin,piedmontese,red_angus,simmental,Angus,Maine-Anjou	rs136788107
24	block_10_chr_24	rs41668379	rs42570102	1921310	1940886	19576	0.04326	Milk	1940884	1940888	QTL_ID=52258	trait=Milk_protein_percentage	Abbrev=PP	breed=charolais,gelbvieh,hereford,limousin,pinzgauer,red_angus,red_poll,simmental,Angus	rs133899835
24	block_10_chr_24	rs41668379	rs42570102	1921310	1940886	19576	0.04326	Production	1940884	1940888	QTL_ID=52256	trait=Net_merit	Abbrev=NM	breed=German_Black_Pied	rs110375792
24	block_10_chr_24	rs41668379	rs42570102	1921310	1940886	19576	0.04326	Production	1940884	1940888	QTL_ID=52257	trait=Length_of_productive_life	Abbrev=PL	breed=charolais,gelbvieh,hereford,limousin,pinzgauer,red_angus,red_poll,simmental,Angus	rs41584106
24	block_10_chr_24	rs41668379	rs42570102	1921310	1940886	19576	0.04326	Reproduction	1940884	1940888	QTL_ID=52254	trait=Daughter_pregnancy_rate	Abbrev=DPR	breed=holstein	rs136788107
24	block_10_chr_24	rs41668379	rs42570102	1921310	1940886	19576	0.04326	Reproduction	1940884	1940888	QTL_ID=52260	trait=Calving_ease	Abbrev=CALEASE	breed=holstein	rs133899835
24	block_10_chr_24	rs41668379	rs42570102	1921310	1940886	19576	0.04326	Reproduction	1940884	1940888	QTL_ID=52261	trait=Stillbirth	Abbrev=SB	breed=holstein	rs41584106
24	block_24_chr_24	rs110709141	rs42036241	3851938	3882222	30284	0.04428	Milk	3877985	3877989	QTL_ID=35070	trait=Milk_linoleic_acid_content	Abbrev=MFA-C18:2	breed=ayrshire,danish_red,Swedish_Red-and-White	rs42379635
24	block_46_chr_24	rs109701128	rs41645751	9514257	9610032	95775	0.0289	Milk	9526631	9526635	QTL_ID=118983	trait=Milk_unglycosylated_kappa-casein_percentage	Abbrev=MUGKCASP	breed=holstein	rs110025934
24	block_236_chr_24	rs110717504	rs110870395	60093951	60176845	82894	0.03574	Milk	60101247	60101251	QTL_ID=113362	trait=Milk_kappa-casein_percentage	Abbrev=MKCASP	breed=ayrshire,danish_red,Swedish_Red-and-White	rs109678718
24	block_236_chr_24	rs110717504	rs110870395	60093951	60176845	82894	0.03574	Milk	60124408	60124412	QTL_ID=112797	trait=Milk_kappa-casein_percentage	Abbrev=MKCASP	breed=ayrshire,danish_red,Swedish_Red-and-White	centromer,BM4505
24	block_236_chr_24	rs110717504	rs110870395	60093951	60176845	82894	0.03574	Production	60093949	60093953	QTL_ID=69276	trait=Body_weight_(yearling)	Abbrev=W365	breed=ayrshire,danish_red,Swedish_Red-and-White	rs109678718
25	block_43_chr_25	rs109558512	rs109583598	7905066	7944597	39531	0.02899	Exterior	7905064	7905068	QTL_ID=22751	trait=Stature	Abbrev=STA	breed=holstein	rs43741924
25	block_43_chr_25	rs109558512	rs109583598	7905066	7944597	39531	0.02899	Production	7905064	7905068	QTL_ID=165059	trait=Methane_production	Abbrev=METH	breed=holstein	rs135306113
25	block_148_chr_25	rs110476838	rs110704904	32312425	32344248	31823	0.04745	Milk	32344246	32344250	QTL_ID=158305	trait=Milking_speed	Abbrev=MSPD	breed=holstein	rs137373027
25	block_163_chr_25	rs109405213	rs109140856	34536825	34556876	20051	0.03138	Milk	34536823	34536827	QTL_ID=26100	trait=Milk_fat_yield	Abbrev=FY	breed=jersey	rs456998485
25	block_163_chr_25	rs109405213	rs109140856	34536825	34556876	20051	0.03138	Production	34556874	34556878	QTL_ID=131454	trait=Hip_height	Abbrev=HIPHT	breed=holstein	rs110586554
25	block_163_chr_25	rs109405213	rs109140856	34536825	34556876	20051	0.03138	Production	34556874	34556878	QTL_ID=131455	trait=Hip_height	Abbrev=HIPHT	breed=holstein	rs110586554
26	block_16_chr_26	rs41650535	rs110308884	7443726	7467841	24115	0.03047	Exterior	7443724	7443728	QTL_ID=52643	trait=Dairy_form	Abbrev=DYF	breed=holstein	rs42092228
26	block_16_chr_26	rs41650535	rs110308884	7443726	7467841	24115	0.03047	Exterior	7443724	7443728	QTL_ID=52646	trait=Teat_placement_-_front	Abbrev=FTPL	breed=holstein	rs42093031
26	block_16_chr_26	rs41650535	rs110308884	7443726	7467841	24115	0.03047	Exterior	7443724	7443728	QTL_ID=52647	trait=Udder_attachment	Abbrev=UA	breed=holstein	rs42092228
26	block_16_chr_26	rs41650535	rs110308884	7443726	7467841	24115	0.03047	Exterior	7443724	7443728	QTL_ID=52648	trait=Teat_placement_-_rear	Abbrev=RTPL	breed=holstein	rs42093031
26	block_16_chr_26	rs41650535	rs110308884	7443726	7467841	24115	0.03047	Exterior	7443724	7443728	QTL_ID=52649	trait=Udder_height	Abbrev=UHT	breed=holstein	rs42092208
26	block_16_chr_26	rs41650535	rs110308884	7443726	7467841	24115	0.03047	Exterior	7443724	7443728	QTL_ID=52650	trait=Udder_cleft	Abbrev=UC	breed=holstein	rs42092213
26	block_16_chr_26	rs41650535	rs110308884	7443726	7467841	24115	0.03047	Production	7443724	7443728	QTL_ID=52645	trait=PTA_type	Abbrev=PTAT	breed=holstein	rs42093031
26	block_16_chr_26	rs41650535	rs110308884	7443726	7467841	24115	0.03047	Reproduction	7443724	7443728	QTL_ID=52644	trait=Daughter_pregnancy_rate	Abbrev=DPR	breed=holstein	rs42092228
26	block_26_chr_26	rs110924756	rs110358830	9836117	9867428	31311	0.0557	Milk	9836115	9836119	QTL_ID=196414	trait=Milk_capric_acid_content	Abbrev=MFA-C10:0	breed=jersey	rs135267521
26	block_26_chr_26	rs110924756	rs110358830	9836117	9867428	31311	0.0557	Milk	9836115	9836119	QTL_ID=196415	trait=Milk_C14_index	Abbrev=MC14	breed=jersey	rs136677471
26	block_26_chr_26	rs110924756	rs110358830	9836117	9867428	31311	0.0557	Milk	9836115	9836119	QTL_ID=196416	trait=Milk_myristoleic_acid_content	Abbrev=MFA-C14:1	breed=jersey	rs133999305
26	block_26_chr_26	rs110924756	rs110358830	9836117	9867428	31311	0.0557	Milk	9836115	9836119	QTL_ID=32552	trait=Milk_myristoleic_acid_content	Abbrev=MFA-C14:1	breed=holstein	rs42092161
26	block_26_chr_26	rs110924756	rs110358830	9836117	9867428	31311	0.0557	Milk	9836115	9836119	QTL_ID=32611	trait=Milk_C14_index	Abbrev=MC14	breed=holstein	rs42092165
26	block_26_chr_26	rs110924756	rs110358830	9836117	9867428	31311	0.0557	Milk	9836115	9836119	QTL_ID=62834	trait=Milk_C14_index	Abbrev=MC14	breed=holstein	rs42092174
26	block_26_chr_26	rs110924756	rs110358830	9836117	9867428	31311	0.0557	Milk	9843563	9843567	QTL_ID=199984	trait=Milk_C14_index	Abbrev=MC14	breed=holstein	rs133999305
26	block_26_chr_26	rs110924756	rs110358830	9836117	9867428	31311	0.0557	Milk	9843563	9843567	QTL_ID=199985	trait=Milk_myristoleic_acid_content	Abbrev=MFA-C14:1	breed=holstein	rs135267521
26	block_26_chr_26	rs110924756	rs110358830	9836117	9867428	31311	0.0557	Milk	9844827	9844831	QTL_ID=199982	trait=Milk_C14_index	Abbrev=MC14	breed=holstein	rs133999305
26	block_26_chr_26	rs110924756	rs110358830	9836117	9867428	31311	0.0557	Milk	9844827	9844831	QTL_ID=199983	trait=Milk_myristoleic_acid_content	Abbrev=MFA-C14:1	breed=holstein	rs136677471
26	block_26_chr_26	rs110924756	rs110358830	9836117	9867428	31311	0.0557	Milk	9845785	9845789	QTL_ID=199980	trait=Milk_C14_index	Abbrev=MC14	breed=jersey	rs135267521
26	block_26_chr_26	rs110924756	rs110358830	9836117	9867428	31311	0.0557	Milk	9845785	9845789	QTL_ID=199981	trait=Milk_myristoleic_acid_content	Abbrev=MFA-C14:1	breed=holstein	rs136677471
26	block_26_chr_26	rs110924756	rs110358830	9836117	9867428	31311	0.0557	Milk	9854101	9854105	QTL_ID=197373	trait=Milk_C14_index	Abbrev=MC14	breed=holstein	rs133999305
26	block_26_chr_26	rs110924756	rs110358830	9836117	9867428	31311	0.0557	Milk	9854101	9854105	QTL_ID=197374	trait=Milk_myristoleic_acid_content	Abbrev=MFA-C14:1	breed=holstein	rs135267521
26	block_26_chr_26	rs110924756	rs110358830	9836117	9867428	31311	0.0557	Milk	9854101	9854105	QTL_ID=202582	trait=Milk_C16_index	Abbrev=MC16	breed=holstein	rs42091368
26	block_26_chr_26	rs110924756	rs110358830	9836117	9867428	31311	0.0557	Milk	9854101	9854105	QTL_ID=208787	trait=Milk_palmitoleic_acid_content	Abbrev=MFA-C16:1	breed=holstein	rs42091368
26	block_26_chr_26	rs110924756	rs110358830	9836117	9867428	31311	0.0557	Milk	9855254	9855258	QTL_ID=205130	trait=Milk_C16_index	Abbrev=MC16	breed=holstein	rs136313314
26	block_26_chr_26	rs110924756	rs110358830	9836117	9867428	31311	0.0557	Milk	9855254	9855258	QTL_ID=211354	trait=Milk_palmitoleic_acid_content	Abbrev=MFA-C16:1	breed=holstein	rs42091368
26	block_26_chr_26	rs110924756	rs110358830	9836117	9867428	31311	0.0557	Milk	9856557	9856561	QTL_ID=201804	trait=Milk_C16_index	Abbrev=MC16	breed=holstein	rs136677471
26	block_26_chr_26	rs110924756	rs110358830	9836117	9867428	31311	0.0557	Milk	9856557	9856561	QTL_ID=207725	trait=Milk_palmitoleic_acid_content	Abbrev=MFA-C16:1	breed=jersey	rs136313314
26	block_26_chr_26	rs110924756	rs110358830	9836117	9867428	31311	0.0557	Milk	9858273	9858277	QTL_ID=202223	trait=Milk_C16_index	Abbrev=MC16	breed=jersey	rs136313314
26	block_26_chr_26	rs110924756	rs110358830	9836117	9867428	31311	0.0557	Milk	9858273	9858277	QTL_ID=208286	trait=Milk_palmitoleic_acid_content	Abbrev=MFA-C16:1	breed=jersey	rs136313314
26	block_26_chr_26	rs110924756	rs110358830	9836117	9867428	31311	0.0557	Milk	9860637	9860641	QTL_ID=204991	trait=Milk_C16_index	Abbrev=MC16	breed=holstein	rs134295703
26	block_26_chr_26	rs110924756	rs110358830	9836117	9867428	31311	0.0557	Milk	9860637	9860641	QTL_ID=211233	trait=Milk_palmitoleic_acid_content	Abbrev=MFA-C16:1	breed=holstein	rs135669257
26	block_26_chr_26	rs110924756	rs110358830	9836117	9867428	31311	0.0557	Milk	9867426	9867430	QTL_ID=196073	trait=Milk_C14_index	Abbrev=MC14	breed=holstein	rs134295703
26	block_39_chr_26	rs41592466	rs42478675	12333205	12369234	36029	0.07229	Milk	12333203	12333207	QTL_ID=198366	trait=Milk_C14_index	Abbrev=MC14	breed=holstein	rs133825521
26	block_39_chr_26	rs41592466	rs42478675	12333205	12369234	36029	0.07229	Milk	12362522	12362526	QTL_ID=196694	trait=Milk_C14_index	Abbrev=MC14	breed=jersey	rs109909331
26	block_39_chr_26	rs41592466	rs42478675	12333205	12369234	36029	0.07229	Milk	12362522	12362526	QTL_ID=201952	trait=Milk_myristoleic_acid_content	Abbrev=MFA-C14:1	breed=jersey	rs109909331
26	block_39_chr_26	rs41592466	rs42478675	12333205	12369234	36029	0.07229	Milk	12363689	12363693	QTL_ID=197280	trait=Milk_C14_index	Abbrev=MC14	breed=holstein	rs134317139
26	block_39_chr_26	rs41592466	rs42478675	12333205	12369234	36029	0.07229	Milk	12363689	12363693	QTL_ID=202502	trait=Milk_myristoleic_acid_content	Abbrev=MFA-C14:1	breed=holstein	rs41660969
26	block_39_chr_26	rs41592466	rs42478675	12333205	12369234	36029	0.07229	Milk	12366434	12366438	QTL_ID=198163	trait=Milk_C14_index	Abbrev=MC14	breed=holstein	rs41660969
26	block_39_chr_26	rs41592466	rs42478675	12333205	12369234	36029	0.07229	Milk	12366434	12366438	QTL_ID=203349	trait=Milk_myristoleic_acid_content	Abbrev=MFA-C14:1	breed=holstein	rs41660969
26	block_39_chr_26	rs41592466	rs42478675	12333205	12369234	36029	0.07229	Milk	12369232	12369236	QTL_ID=199795	trait=Milk_C14_index	Abbrev=MC14	breed=jersey	rs109193590
26	block_39_chr_26	rs41592466	rs42478675	12333205	12369234	36029	0.07229	Milk	12369232	12369236	QTL_ID=204890	trait=Milk_myristoleic_acid_content	Abbrev=MFA-C14:1	breed=jersey	rs797226609
26	block_43_chr_26	rs110970157	rs41661672	13899525	13934098	34573	0.02836	Milk	13899523	13899527	QTL_ID=196451	trait=Milk_C14_index	Abbrev=MC14	breed=holstein	rs42096533
26	block_43_chr_26	rs110970157	rs41661672	13899525	13934098	34573	0.02836	Milk	13899523	13899527	QTL_ID=201719	trait=Milk_myristoleic_acid_content	Abbrev=MFA-C14:1	breed=holstein	rs42096533
26	block_43_chr_26	rs110970157	rs41661672	13899525	13934098	34573	0.02836	Milk	13910515	13910519	QTL_ID=199736	trait=Milk_C14_index	Abbrev=MC14	breed=holstein	rs42096546
26	block_43_chr_26	rs110970157	rs41661672	13899525	13934098	34573	0.02836	Milk	13910515	13910519	QTL_ID=204790	trait=Milk_myristoleic_acid_content	Abbrev=MFA-C14:1	breed=holstein	rs42096533
26	block_43_chr_26	rs110970157	rs41661672	13899525	13934098	34573	0.02836	Milk	13924876	13924880	QTL_ID=199737	trait=Milk_C14_index	Abbrev=MC14	breed=holstein	rs42096546
26	block_43_chr_26	rs110970157	rs41661672	13899525	13934098	34573	0.02836	Milk	13924876	13924880	QTL_ID=204791	trait=Milk_myristoleic_acid_content	Abbrev=MFA-C14:1	breed=holstein	rs42093866
26	block_43_chr_26	rs110970157	rs41661672	13899525	13934098	34573	0.02836	Milk	13927974	13927978	QTL_ID=199742	trait=Milk_C14_index	Abbrev=MC14	breed=holstein	rs42093868
26	block_43_chr_26	rs110970157	rs41661672	13899525	13934098	34573	0.02836	Milk	13927974	13927978	QTL_ID=204796	trait=Milk_myristoleic_acid_content	Abbrev=MFA-C14:1	breed=holstein	rs42093868
26	block_43_chr_26	rs110970157	rs41661672	13899525	13934098	34573	0.02836	Milk	13929165	13929169	QTL_ID=199741	trait=Milk_C14_index	Abbrev=MC14	breed=holstein	rs42093866
26	block_43_chr_26	rs110970157	rs41661672	13899525	13934098	34573	0.02836	Milk	13929165	13929169	QTL_ID=204795	trait=Milk_myristoleic_acid_content	Abbrev=MFA-C14:1	breed=holstein	rs42093868
26	block_43_chr_26	rs110970157	rs41661672	13899525	13934098	34573	0.02836	Milk	13930745	13930749	QTL_ID=196352	trait=Milk_C14_index	Abbrev=MC14	breed=holstein	rs42093880
26	block_43_chr_26	rs110970157	rs41661672	13899525	13934098	34573	0.02836	Milk	13930745	13930749	QTL_ID=201610	trait=Milk_myristoleic_acid_content	Abbrev=MFA-C14:1	breed=holstein	rs109098502
26	block_43_chr_26	rs110970157	rs41661672	13899525	13934098	34573	0.02836	Milk	13932801	13932805	QTL_ID=199740	trait=Milk_C14_index	Abbrev=MC14	breed=holstein	rs109098502
26	block_43_chr_26	rs110970157	rs41661672	13899525	13934098	34573	0.02836	Milk	13932801	13932805	QTL_ID=204794	trait=Milk_myristoleic_acid_content	Abbrev=MFA-C14:1	breed=holstein	rs137829267
26	block_43_chr_26	rs110970157	rs41661672	13899525	13934098	34573	0.02836	Milk	13933445	13933449	QTL_ID=199739	trait=Milk_C14_index	Abbrev=MC14	breed=holstein	rs109098502
26	block_43_chr_26	rs110970157	rs41661672	13899525	13934098	34573	0.02836	Milk	13933445	13933449	QTL_ID=204793	trait=Milk_myristoleic_acid_content	Abbrev=MFA-C14:1	breed=holstein	rs42093880
26	block_43_chr_26	rs110970157	rs41661672	13899525	13934098	34573	0.02836	Milk	13934096	13934100	QTL_ID=198467	trait=Milk_C14_index	Abbrev=MC14	breed=holstein	rs208799762
26	block_43_chr_26	rs110970157	rs41661672	13899525	13934098	34573	0.02836	Milk	13934096	13934100	QTL_ID=203634	trait=Milk_myristoleic_acid_content	Abbrev=MFA-C14:1	breed=holstein	rs137829267
26	block_47_chr_26	rs109184928	rs109653528	14684949	14710058	25109	0.04049	Milk	14690651	14690655	QTL_ID=199721	trait=Milk_C14_index	Abbrev=MC14	breed=holstein	rs42095864
26	block_47_chr_26	rs109184928	rs109653528	14684949	14710058	25109	0.04049	Milk	14690651	14690655	QTL_ID=204760	trait=Milk_myristoleic_acid_content	Abbrev=MFA-C14:1	breed=holstein	rs42095885
26	block_47_chr_26	rs109184928	rs109653528	14684949	14710058	25109	0.04049	Milk	14690651	14690655	QTL_ID=34447	trait=Milk_C14_index	Abbrev=MC14	breed=holstein	rs42092592
26	block_47_chr_26	rs109184928	rs109653528	14684949	14710058	25109	0.04049	Milk	14695941	14695945	QTL_ID=199720	trait=Milk_C14_index	Abbrev=MC14	breed=holstein	rs42095874
26	block_47_chr_26	rs109184928	rs109653528	14684949	14710058	25109	0.04049	Milk	14695941	14695945	QTL_ID=204759	trait=Milk_C16_index	Abbrev=MC16	breed=holstein	rs42095892
26	block_60_chr_26	rs42084620	rs41606817	17606022	17628730	22708	0.03481	Milk	17606020	17606024	QTL_ID=198806	trait=Milk_C14_index	Abbrev=MC14	breed=holstein	rs42097050,rs43043628
26	block_60_chr_26	rs42084620	rs41606817	17606022	17628730	22708	0.03481	Milk	17606020	17606024	QTL_ID=203799	trait=Milk_myristoleic_acid_content	Abbrev=MFA-C14:1	breed=holstein	rs42841226
26	block_60_chr_26	rs42084620	rs41606817	17606022	17628730	22708	0.03481	Milk	17606020	17606024	QTL_ID=210277	trait=Milk_palmitoleic_acid_content	Abbrev=MFA-C16:1	breed=holstein	rs42281654
26	block_60_chr_26	rs42084620	rs41606817	17606022	17628730	22708	0.03481	Milk	17607825	17607829	QTL_ID=198815	trait=Milk_C14_index	Abbrev=MC14	breed=holstein	rs110561879
26	block_60_chr_26	rs42084620	rs41606817	17606022	17628730	22708	0.03481	Milk	17607825	17607829	QTL_ID=203809	trait=Milk_myristoleic_acid_content	Abbrev=MFA-C14:1	breed=holstein	rs109409044
26	block_60_chr_26	rs42084620	rs41606817	17606022	17628730	22708	0.03481	Milk	17607825	17607829	QTL_ID=203810	trait=Milk_C16_index	Abbrev=MC16	breed=holstein	rs110860391
26	block_60_chr_26	rs42084620	rs41606817	17606022	17628730	22708	0.03481	Milk	17607825	17607829	QTL_ID=210281	trait=Milk_palmitoleic_acid_content	Abbrev=MFA-C16:1	breed=holstein	rs109131852
26	block_60_chr_26	rs42084620	rs41606817	17606022	17628730	22708	0.03481	Milk	17617391	17617395	QTL_ID=196133	trait=Milk_C14_index	Abbrev=MC14	breed=holstein	rs136224053
26	block_60_chr_26	rs42084620	rs41606817	17606022	17628730	22708	0.03481	Milk	17617391	17617395	QTL_ID=201342	trait=Milk_myristoleic_acid_content	Abbrev=MFA-C14:1	breed=holstein	rs109753203
26	block_60_chr_26	rs42084620	rs41606817	17606022	17628730	22708	0.03481	Milk	17617391	17617395	QTL_ID=201343	trait=Milk_C16_index	Abbrev=MC16	breed=holstein	rs110313869
26	block_60_chr_26	rs42084620	rs41606817	17606022	17628730	22708	0.03481	Milk	17617391	17617395	QTL_ID=206974	trait=Milk_palmitoleic_acid_content	Abbrev=MFA-C16:1	breed=holstein	rs110561879
26	block_60_chr_26	rs42084620	rs41606817	17606022	17628730	22708	0.03481	Milk	17618192	17618196	QTL_ID=195277	trait=Milk_C14_index	Abbrev=MC14	breed=holstein	rs137033581
26	block_60_chr_26	rs42084620	rs41606817	17606022	17628730	22708	0.03481	Milk	17618192	17618196	QTL_ID=200292	trait=Milk_myristoleic_acid_content	Abbrev=MFA-C14:1	breed=holstein	rs109409044
26	block_60_chr_26	rs42084620	rs41606817	17606022	17628730	22708	0.03481	Milk	17618192	17618196	QTL_ID=200293	trait=Milk_C16_index	Abbrev=MC16	breed=holstein	rs109783310
26	block_60_chr_26	rs42084620	rs41606817	17606022	17628730	22708	0.03481	Milk	17618192	17618196	QTL_ID=205326	trait=Milk_palmitoleic_acid_content	Abbrev=MFA-C16:1	breed=holstein	rs110860391
26	block_60_chr_26	rs42084620	rs41606817	17606022	17628730	22708	0.03481	Milk	17622986	17622990	QTL_ID=198816	trait=Milk_C14_index	Abbrev=MC14	breed=holstein	rs136224053
26	block_60_chr_26	rs42084620	rs41606817	17606022	17628730	22708	0.03481	Milk	17622986	17622990	QTL_ID=203811	trait=Milk_myristoleic_acid_content	Abbrev=MFA-C14:1	breed=holstein	rs42282216
26	block_60_chr_26	rs42084620	rs41606817	17606022	17628730	22708	0.03481	Milk	17622986	17622990	QTL_ID=203812	trait=Milk_C16_index	Abbrev=MC16	breed=holstein	rs42282203
26	block_60_chr_26	rs42084620	rs41606817	17606022	17628730	22708	0.03481	Milk	17622986	17622990	QTL_ID=210282	trait=Milk_palmitoleic_acid_content	Abbrev=MFA-C16:1	breed=holstein	rs42282216
26	block_60_chr_26	rs42084620	rs41606817	17606022	17628730	22708	0.03481	Milk	17624563	17624567	QTL_ID=197078	trait=Milk_C14_index	Abbrev=MC14	breed=holstein	rs137033581
26	block_60_chr_26	rs42084620	rs41606817	17606022	17628730	22708	0.03481	Milk	17624563	17624567	QTL_ID=202305	trait=Milk_myristoleic_acid_content	Abbrev=MFA-C14:1	breed=holstein	rs42282216
26	block_60_chr_26	rs42084620	rs41606817	17606022	17628730	22708	0.03481	Milk	17625694	17625698	QTL_ID=198091	trait=Milk_C14_index	Abbrev=MC14	breed=holstein	rs42282216
26	block_60_chr_26	rs42084620	rs41606817	17606022	17628730	22708	0.03481	Milk	17625694	17625698	QTL_ID=203277	trait=Milk_myristoleic_acid_content	Abbrev=MFA-C14:1	breed=holstein	rs42283047
26	block_60_chr_26	rs42084620	rs41606817	17606022	17628730	22708	0.03481	Milk	17625694	17625698	QTL_ID=203278	trait=Milk_C16_index	Abbrev=MC16	breed=holstein	rs42283047
26	block_60_chr_26	rs42084620	rs41606817	17606022	17628730	22708	0.03481	Milk	17628728	17628732	QTL_ID=198392	trait=Milk_C14_index	Abbrev=MC14	breed=holstein	rs108945159
26	block_60_chr_26	rs42084620	rs41606817	17606022	17628730	22708	0.03481	Milk	17628728	17628732	QTL_ID=203558	trait=Milk_myristoleic_acid_content	Abbrev=MFA-C14:1	breed=holstein	rs42283047
26	block_60_chr_26	rs42084620	rs41606817	17606022	17628730	22708	0.03481	Milk	17628728	17628732	QTL_ID=203559	trait=Milk_C16_index	Abbrev=MC16	breed=holstein	rs42283047
26	block_71_chr_26	rs42516406	rs43090614	20072366	20104927	32561	0.03208	Milk	20073765	20073769	QTL_ID=34829	trait=Milk_C14_index	Abbrev=MC14	breed=holstein	rs137474830
26	block_71_chr_26	rs42516406	rs43090614	20072366	20104927	32561	0.03208	Milk	20075410	20075414	QTL_ID=34830	trait=Milk_C14_index	Abbrev=MC14	breed=holstein	rs41646909
26	block_100_chr_26	rs41604819	rs41636627	27902998	27933010	30012	0.03781	Health	27902996	27903000	QTL_ID=164765	trait=Clinical_mastitis	Abbrev=CM	breed=brown_swiss	rs110294629
26	block_100_chr_26	rs41604819	rs41636627	27902998	27933010	30012	0.03781	Health	27904734	27904738	QTL_ID=164816	trait=Clinical_mastitis	Abbrev=CM	breed=brown_swiss	rs109732989
26	block_100_chr_26	rs41604819	rs41636627	27902998	27933010	30012	0.03781	Health	27906365	27906369	QTL_ID=164817	trait=Clinical_mastitis	Abbrev=CM	breed=brown_swiss	rs798535660
26	block_100_chr_26	rs41604819	rs41636627	27902998	27933010	30012	0.03781	Health	27907105	27907109	QTL_ID=164818	trait=Clinical_mastitis	Abbrev=CM	breed=brown_swiss	rs43706199
26	block_100_chr_26	rs41604819	rs41636627	27902998	27933010	30012	0.03781	Health	27908612	27908616	QTL_ID=164819	trait=Clinical_mastitis	Abbrev=CM	breed=brown_swiss	rs29027496
26	block_100_chr_26	rs41604819	rs41636627	27902998	27933010	30012	0.03781	Health	27909201	27909205	QTL_ID=164820	trait=Clinical_mastitis	Abbrev=CM	breed=brown_swiss	rs109696042
26	block_100_chr_26	rs41604819	rs41636627	27902998	27933010	30012	0.03781	Health	27910654	27910658	QTL_ID=164821	trait=Clinical_mastitis	Abbrev=CM	breed=brown_swiss	rs109696042
26	block_100_chr_26	rs41604819	rs41636627	27902998	27933010	30012	0.03781	Health	27912418	27912422	QTL_ID=164822	trait=Clinical_mastitis	Abbrev=CM	breed=brown_swiss	BMS1600,BMS1948
26	block_100_chr_26	rs41604819	rs41636627	27902998	27933010	30012	0.03781	Health	27913058	27913062	QTL_ID=164823	trait=Clinical_mastitis	Abbrev=CM	breed=brown_swiss	rs42199317,rs42190610
26	block_100_chr_26	rs41604819	rs41636627	27902998	27933010	30012	0.03781	Health	27914646	27914650	QTL_ID=164824	trait=Clinical_mastitis	Abbrev=CM	breed=brown_swiss	rs42199317,rs42190610
26	block_100_chr_26	rs41604819	rs41636627	27902998	27933010	30012	0.03781	Health	27915877	27915881	QTL_ID=164825	trait=Clinical_mastitis	Abbrev=CM	breed=brown_swiss	rs42199297,rs110876824
26	block_100_chr_26	rs41604819	rs41636627	27902998	27933010	30012	0.03781	Health	27917423	27917427	QTL_ID=164826	trait=Clinical_mastitis	Abbrev=CM	breed=brown_swiss	rs42199297,rs110876824
26	block_100_chr_26	rs41604819	rs41636627	27902998	27933010	30012	0.03781	Health	27919613	27919617	QTL_ID=164827	trait=Clinical_mastitis	Abbrev=CM	breed=brown_swiss	rs42199297,rs110876824
26	block_100_chr_26	rs41604819	rs41636627	27902998	27933010	30012	0.03781	Milk	27902996	27903000	QTL_ID=198379	trait=Milk_C14_index	Abbrev=MC14	breed=brown_swiss	rs109843387
26	block_100_chr_26	rs41604819	rs41636627	27902998	27933010	30012	0.03781	Milk	27902996	27903000	QTL_ID=203548	trait=Milk_myristoleic_acid_content	Abbrev=MFA-C14:1	breed=brown_swiss	rs109273173
26	block_100_chr_26	rs41604819	rs41636627	27902998	27933010	30012	0.03781	Milk	27902996	27903000	QTL_ID=210004	trait=Milk_C16_index	Abbrev=MC16	breed=brown_swiss	rs110339141
26	block_100_chr_26	rs41604819	rs41636627	27902998	27933010	30012	0.03781	Milk	27902996	27903000	QTL_ID=210005	trait=Milk_palmitoleic_acid_content	Abbrev=MFA-C16:1	breed=brown_swiss	rs110834204
26	block_100_chr_26	rs41604819	rs41636627	27902998	27933010	30012	0.03781	Milk	27904734	27904738	QTL_ID=197441	trait=Milk_C14_index	Abbrev=MC14	breed=brown_swiss	rs110224964
26	block_100_chr_26	rs41604819	rs41636627	27902998	27933010	30012	0.03781	Milk	27904734	27904738	QTL_ID=202659	trait=Milk_myristoleic_acid_content	Abbrev=MFA-C14:1	breed=brown_swiss	rs137389740
26	block_100_chr_26	rs41604819	rs41636627	27902998	27933010	30012	0.03781	Milk	27904734	27904738	QTL_ID=208875	trait=Milk_C16_index	Abbrev=MC16	breed=brown_swiss	rs479781325
26	block_100_chr_26	rs41604819	rs41636627	27902998	27933010	30012	0.03781	Milk	27904734	27904738	QTL_ID=208876	trait=Milk_palmitoleic_acid_content	Abbrev=MFA-C16:1	breed=brown_swiss	rs714693579
26	block_100_chr_26	rs41604819	rs41636627	27902998	27933010	30012	0.03781	Milk	27906365	27906369	QTL_ID=198427	trait=Milk_C14_index	Abbrev=MC14	breed=brown_swiss	rs474461295
26	block_100_chr_26	rs41604819	rs41636627	27902998	27933010	30012	0.03781	Milk	27906365	27906369	QTL_ID=203597	trait=Milk_myristoleic_acid_content	Abbrev=MFA-C14:1	breed=brown_swiss	rs384487403
26	block_100_chr_26	rs41604819	rs41636627	27902998	27933010	30012	0.03781	Milk	27906365	27906369	QTL_ID=210068	trait=Milk_C16_index	Abbrev=MC16	breed=brown_swiss	rs110552089,rs43709648,rs109977592
26	block_100_chr_26	rs41604819	rs41636627	27902998	27933010	30012	0.03781	Milk	27906365	27906369	QTL_ID=210069	trait=Milk_palmitoleic_acid_content	Abbrev=MFA-C16:1	breed=brown_swiss	rs714948819
26	block_100_chr_26	rs41604819	rs41636627	27902998	27933010	30012	0.03781	Milk	27907105	27907109	QTL_ID=196934	trait=Milk_C14_index	Abbrev=MC14	breed=brown_swiss	rs469753606
26	block_100_chr_26	rs41604819	rs41636627	27902998	27933010	30012	0.03781	Milk	27907105	27907109	QTL_ID=202180	trait=Milk_myristoleic_acid_content	Abbrev=MFA-C14:1	breed=brown_swiss	rs110552089,rs41586223,rs109977592
26	block_100_chr_26	rs41604819	rs41636627	27902998	27933010	30012	0.03781	Milk	27907105	27907109	QTL_ID=208240	trait=Milk_C16_index	Abbrev=MC16	breed=brown_swiss	rs431952291
26	block_100_chr_26	rs41604819	rs41636627	27902998	27933010	30012	0.03781	Milk	27907105	27907109	QTL_ID=208241	trait=Milk_palmitoleic_acid_content	Abbrev=MFA-C16:1	breed=brown_swiss	rs42192738
26	block_100_chr_26	rs41604819	rs41636627	27902998	27933010	30012	0.03781	Milk	27908612	27908616	QTL_ID=196738	trait=Milk_C14_index	Abbrev=MC14	breed=brown_swiss	rs42188540
26	block_100_chr_26	rs41604819	rs41636627	27902998	27933010	30012	0.03781	Milk	27908612	27908616	QTL_ID=201980	trait=Milk_myristoleic_acid_content	Abbrev=MFA-C14:1	breed=brown_swiss	rs482360500
26	block_100_chr_26	rs41604819	rs41636627	27902998	27933010	30012	0.03781	Milk	27908612	27908616	QTL_ID=207985	trait=Milk_C16_index	Abbrev=MC16	breed=brown_swiss	rs472263368
26	block_100_chr_26	rs41604819	rs41636627	27902998	27933010	30012	0.03781	Milk	27908612	27908616	QTL_ID=207986	trait=Milk_palmitoleic_acid_content	Abbrev=MFA-C16:1	breed=brown_swiss	rs477032311
26	block_100_chr_26	rs41604819	rs41636627	27902998	27933010	30012	0.03781	Milk	27909201	27909205	QTL_ID=197392	trait=Milk_C14_index	Abbrev=MC14	breed=brown_swiss	rs447740076
26	block_100_chr_26	rs41604819	rs41636627	27902998	27933010	30012	0.03781	Milk	27909201	27909205	QTL_ID=202604	trait=Milk_myristoleic_acid_content	Abbrev=MFA-C14:1	breed=brown_swiss	rs42198653
26	block_100_chr_26	rs41604819	rs41636627	27902998	27933010	30012	0.03781	Milk	27909201	27909205	QTL_ID=208810	trait=Milk_C16_index	Abbrev=MC16	breed=brown_swiss	rs724039688
26	block_100_chr_26	rs41604819	rs41636627	27902998	27933010	30012	0.03781	Milk	27909201	27909205	QTL_ID=208811	trait=Milk_palmitoleic_acid_content	Abbrev=MFA-C16:1	breed=brown_swiss	rs465440023
26	block_100_chr_26	rs41604819	rs41636627	27902998	27933010	30012	0.03781	Milk	27910654	27910658	QTL_ID=196702	trait=Milk_C14_index	Abbrev=MC14	breed=brown_swiss	rs42188540
26	block_100_chr_26	rs41604819	rs41636627	27902998	27933010	30012	0.03781	Milk	27910654	27910658	QTL_ID=201957	trait=Milk_myristoleic_acid_content	Abbrev=MFA-C14:1	breed=brown_swiss	rs42198651
26	block_100_chr_26	rs41604819	rs41636627	27902998	27933010	30012	0.03781	Milk	27910654	27910658	QTL_ID=207943	trait=Milk_C16_index	Abbrev=MC16	breed=brown_swiss	rs110457204
26	block_100_chr_26	rs41604819	rs41636627	27902998	27933010	30012	0.03781	Milk	27910654	27910658	QTL_ID=207944	trait=Milk_palmitoleic_acid_content	Abbrev=MFA-C16:1	breed=brown_swiss	rs42192429
26	block_100_chr_26	rs41604819	rs41636627	27902998	27933010	30012	0.03781	Milk	27912418	27912422	QTL_ID=197306	trait=Milk_C14_index	Abbrev=MC14	breed=brown_swiss	rs714196936
26	block_100_chr_26	rs41604819	rs41636627	27902998	27933010	30012	0.03781	Milk	27912418	27912422	QTL_ID=202526	trait=Milk_myristoleic_acid_content	Abbrev=MFA-C14:1	breed=brown_swiss	rs379150270
26	block_100_chr_26	rs41604819	rs41636627	27902998	27933010	30012	0.03781	Milk	27912418	27912422	QTL_ID=208705	trait=Milk_C16_index	Abbrev=MC16	breed=Angus	rs110858411
26	block_100_chr_26	rs41604819	rs41636627	27902998	27933010	30012	0.03781	Milk	27912418	27912422	QTL_ID=208706	trait=Milk_palmitoleic_acid_content	Abbrev=MFA-C16:1	breed=brown_swiss	rs42190003
26	block_100_chr_26	rs41604819	rs41636627	27902998	27933010	30012	0.03781	Milk	27913058	27913062	QTL_ID=197754	trait=Milk_C14_index	Abbrev=MC14	breed=caucasian,charolais,hereford,simmental	rs42194371
26	block_100_chr_26	rs41604819	rs41636627	27902998	27933010	30012	0.03781	Milk	27913058	27913062	QTL_ID=202954	trait=Milk_myristoleic_acid_content	Abbrev=MFA-C14:1	breed=brown_swiss	rs42188145
26	block_100_chr_26	rs41604819	rs41636627	27902998	27933010	30012	0.03781	Milk	27913058	27913062	QTL_ID=209265	trait=Milk_C16_index	Abbrev=MC16	breed=brown_swiss	rs110567382
26	block_100_chr_26	rs41604819	rs41636627	27902998	27933010	30012	0.03781	Milk	27913058	27913062	QTL_ID=209266	trait=Milk_palmitoleic_acid_content	Abbrev=MFA-C16:1	breed=brown_swiss	rs110567382
26	block_100_chr_26	rs41604819	rs41636627	27902998	27933010	30012	0.03781	Milk	27914646	27914650	QTL_ID=197231	trait=Milk_C14_index	Abbrev=MC14	breed=Angus	rs110333606
26	block_100_chr_26	rs41604819	rs41636627	27902998	27933010	30012	0.03781	Milk	27914646	27914650	QTL_ID=202452	trait=Milk_myristoleic_acid_content	Abbrev=MFA-C14:1	breed=brown_swiss	rs42194740
26	block_100_chr_26	rs41604819	rs41636627	27902998	27933010	30012	0.03781	Milk	27914646	27914650	QTL_ID=208607	trait=Milk_C16_index	Abbrev=MC16	breed=brown_swiss	rs42198369,rs137262032
26	block_100_chr_26	rs41604819	rs41636627	27902998	27933010	30012	0.03781	Milk	27914646	27914650	QTL_ID=208608	trait=Milk_palmitoleic_acid_content	Abbrev=MFA-C16:1	breed=brown_swiss	rs476573960
26	block_100_chr_26	rs41604819	rs41636627	27902998	27933010	30012	0.03781	Milk	27915877	27915881	QTL_ID=198211	trait=Milk_C14_index	Abbrev=MC14	breed=brown_swiss	BMC1206,BMS1948
26	block_100_chr_26	rs41604819	rs41636627	27902998	27933010	30012	0.03781	Milk	27915877	27915881	QTL_ID=203392	trait=Milk_myristoleic_acid_content	Abbrev=MFA-C14:1	breed=Angus	rs42188145
26	block_100_chr_26	rs41604819	rs41636627	27902998	27933010	30012	0.03781	Milk	27915877	27915881	QTL_ID=209830	trait=Milk_C16_index	Abbrev=MC16	breed=brown_swiss	rs42845824
26	block_100_chr_26	rs41604819	rs41636627	27902998	27933010	30012	0.03781	Milk	27915877	27915881	QTL_ID=209831	trait=Milk_palmitoleic_acid_content	Abbrev=MFA-C16:1	breed=brown_swiss	rs110699324
26	block_100_chr_26	rs41604819	rs41636627	27902998	27933010	30012	0.03781	Milk	27917423	27917427	QTL_ID=196889	trait=Milk_C14_index	Abbrev=MC14	breed=holstein	rs42194370
26	block_100_chr_26	rs41604819	rs41636627	27902998	27933010	30012	0.03781	Milk	27917423	27917427	QTL_ID=202127	trait=Milk_myristoleic_acid_content	Abbrev=MFA-C14:1	breed=brown_swiss	rs41586599
26	block_100_chr_26	rs41604819	rs41636627	27902998	27933010	30012	0.03781	Milk	27917423	27917427	QTL_ID=208169	trait=Milk_C16_index	Abbrev=MC16	breed=brown_swiss	rs42199297
26	block_100_chr_26	rs41604819	rs41636627	27902998	27933010	30012	0.03781	Milk	27917423	27917427	QTL_ID=208170	trait=Milk_palmitoleic_acid_content	Abbrev=MFA-C16:1	breed=brown_swiss	rs42193661
26	block_100_chr_26	rs41604819	rs41636627	27902998	27933010	30012	0.03781	Milk	27919613	27919617	QTL_ID=197317	trait=Milk_C14_index	Abbrev=MC14	breed=brown_swiss	BMS1948
26	block_100_chr_26	rs41604819	rs41636627	27902998	27933010	30012	0.03781	Milk	27919613	27919617	QTL_ID=202536	trait=Milk_myristoleic_acid_content	Abbrev=MFA-C14:1	breed=brown_swiss	rs110594162
26	block_100_chr_26	rs41604819	rs41636627	27902998	27933010	30012	0.03781	Milk	27919613	27919617	QTL_ID=208727	trait=Milk_C16_index	Abbrev=MC16	breed=brown_swiss	rs110567382
26	block_100_chr_26	rs41604819	rs41636627	27902998	27933010	30012	0.03781	Milk	27919613	27919617	QTL_ID=208728	trait=Milk_palmitoleic_acid_content	Abbrev=MFA-C16:1	breed=brown_swiss	rs110567382
26	block_187_chr_26	rs109450346	rs42101711	46765748	46787804	22056	0.05165	Milk	46765746	46765750	QTL_ID=113783	trait=Milk_kappa-casein_percentage	Abbrev=MKCASP	breed=piedmontese
26	block_187_chr_26	rs109450346	rs42101711	46765748	46787804	22056	0.05165	Milk	46765746	46765750	QTL_ID=116938	trait=Milk_glycosylated_kappa-casein_percentage	Abbrev=MGKCASP	breed=charolais,hereford,limousin,simmental,Angus
[truncated: 84 more rows]

## Sheet: SNP_Haplotypes_LD0.50_top_0.01%
Genes overlapped with the top 0.001% markers in percentage of variance explained
[truncated: 1,349 more rows]

[truncated: 4 more sheets: SNP_Haplotypes_LD0.80_top_0.01%, SNP_Haplotypes_LD0.15_top_0.05%, SNP_Haplotypes_LD0.50_top_0.05%, SNP_Haplotypes_LD0.80_top_0.05%]
