# Supplementary material for: Haplotype-Based Single-Step GWAS for Yearling Temperament in American Angus Cattle
Source: Genes (Basel). 2021 Dec 22;13(1):17. doi: 10.3390/genes13010017 (PMC8775055; doi:10.3390/genes13010017)
Supplement: Supplementary file 1 [file genes-13-00017-s001.zip › genes-1492001-supplementary/Supplementary_File_S6.xlsx]

## Sheet: Haplotypes_LD0.15
Functional Annotation Table
Help and Manual
Current Gene List: List_2
Current Background: Bos taurus
9 DAVID IDs
9 record(s)	Download File
ENSBTAG00000010620	ATPase H+ transporting V1 subunit B1(ATP6V1B1)	Related Genes	Bos taurus
GOTERM_BP_DIRECT	ossification, regulation of pH, excretion, sensory perception of sound, ATP hydrolysis coupled proton transport, proton transport, inner ear morphogenesis, pH reduction, ATP metabolic process, calcium ion homeostasis,
GOTERM_CC_DIRECT	cytoplasm, cytosol, microvillus, basolateral plasma membrane, apical plasma membrane, lateral plasma membrane, vacuolar proton-transporting V-type ATPase complex, proton-transporting V-type ATPase, V1 domain, extracellular exosome,
GOTERM_MF_DIRECT	ATP binding, hydrogen ion transmembrane transporter activity, hydrolase activity, acting on acid anhydrides, catalyzing transmembrane movement of substances,
INTERPRO	ATPase, F1/V1/A1 complex, alpha/beta subunit, nucleotide-binding domain, ATPase, alpha/beta subunit, N-terminal, ATPase, V1 complex, subunit B, ATPase, alpha/beta subunit, nucleotide-binding domain, active site, V-type ATP synthase regulatory subunit B/beta, P-loop containing nucleoside triphosphate hydrolase,
KEGG_PATHWAY	Oxidative phosphorylation, Metabolic pathways, Phagosome, Synaptic vesicle cycle, Collecting duct acid secretion, Rheumatoid arthritis,
UP_KEYWORDS	Cell membrane, Complete proteome, Direct protein sequencing, Hydrogen ion transport, Hydrolase, Ion transport, Membrane, Reference proteome, Transport,
UP_SEQ_FEATURE	chain:V-type proton ATPase subunit B, kidney isoform, short sequence motif:PDZ-binding,
ENSBTAG00000010623	ankyrin repeat domain 53(ANKRD53)	Related Genes	Bos taurus
GOTERM_BP_DIRECT	mitotic metaphase plate congression, positive regulation of microtubule polymerization, regulation of mitotic spindle organization, regulation of mitotic cytokinesis,
GOTERM_CC_DIRECT	spindle pole,
INTERPRO	Ankyrin repeat, Ankyrin repeat-containing domain,
SMART	ANK,
UP_KEYWORDS	ANK repeat, Complete proteome, Reference proteome,
ENSBTAG00000012222	fatty acid 2-hydroxylase(FA2H)	Related Genes	Bos taurus
GOTERM_BP_DIRECT	sebaceous gland cell differentiation, fatty acid metabolic process, fatty acid biosynthetic process, lipid modification, central nervous system myelin maintenance, peripheral nervous system myelin maintenance, regulation of cell proliferation, regulation of hair cycle,
GOTERM_CC_DIRECT	endoplasmic reticulum, endoplasmic reticulum membrane, integral component of membrane,
GOTERM_MF_DIRECT	iron ion binding, fatty acid alpha-hydroxylase activity,
INTERPRO	Cytochrome b5-like heme/steroid binding domain, Fatty acid hydroxylase, Inositolphosphorylceramide-B hydroxylase,
PIR_SUPERFAMILY	inositolphosphorylceramide-B hydroxylase,
SMART	SM01117,
UP_KEYWORDS	Complete proteome, Endoplasmic reticulum, Fatty acid biosynthesis, Fatty acid metabolism, Iron, Lipid biosynthesis, Lipid metabolism, Membrane, Metal-binding, Oxidoreductase, Reference proteome, Transmembrane, Transmembrane helix,
ENSBTAG00000014211	forkhead box P4(FOXP4)	Related Genes	Bos taurus
COG_ONTOLOGY	Transcription,
GOTERM_BP_DIRECT	transcription, DNA-templated,
GOTERM_CC_DIRECT	nucleus,
GOTERM_MF_DIRECT	RNA polymerase II transcription factor activity, sequence-specific DNA binding, sequence-specific DNA binding,
INTERPRO	Transcription factor, fork head, Winged helix-turn-helix DNA-binding domain,
SMART	FH,
UP_KEYWORDS	Complete proteome, DNA-binding, Nucleus, Reference proteome, Transcription,
ENSBTAG00000007989	fucosyltransferase 9(FUT9)	Related Genes	Bos taurus
GOTERM_BP_DIRECT	protein glycosylation, protein N-linked glycosylation, fucosylation,
GOTERM_CC_DIRECT	Golgi membrane, integral component of membrane, Golgi cisterna membrane,
GOTERM_MF_DIRECT	alpha-(1->3)-fucosyltransferase activity,
INTERPRO	Glycosyl transferase, family 10,
KEGG_PATHWAY	Glycosphingolipid biosynthesis - lacto and neolacto series, Glycosphingolipid biosynthesis - globo series, Metabolic pathways,
UP_KEYWORDS	Complete proteome, Glycoprotein, Glycosyltransferase, Golgi apparatus, Membrane, Reference proteome, Signal-anchor, Transferase, Transmembrane, Transmembrane helix,
UP_SEQ_FEATURE	chain:Alpha-(1,3)-fucosyltransferase, glycosylation site:N-linked (GlcNAc...), topological domain:Cytoplasmic, topological domain:Lumenal, transmembrane region,
ENSBTAG00000012216	mixed lineage kinase domain like(MLKL)	Related Genes	Bos taurus
GOTERM_BP_DIRECT	protein homotrimerization, necroptotic process,
GOTERM_CC_DIRECT	cytoplasm, plasma membrane,
GOTERM_MF_DIRECT	protein kinase activity, ATP binding,
INTERPRO	Protein kinase, catalytic domain, Serine-threonine/tyrosine-protein kinase catalytic domain, Protein kinase-like domain,
KEGG_PATHWAY	TNF signaling pathway,
UP_KEYWORDS	Complete proteome, Reference proteome,
ENSBTAG00000009159	plexin A1(PLXNA1)	Related Genes	Bos taurus
GOTERM_BP_DIRECT	regulation of smooth muscle cell migration, branchiomotor neuron axon guidance, regulation of cell migration, regulation of axon extension involved in axon guidance, dichotomous subdivision of terminal units involved in salivary gland branching, semaphorin-plexin signaling pathway involved in axon guidance, neuron projection extension,
GOTERM_CC_DIRECT	semaphorin receptor complex, nucleus, cytoplasm, integral component of plasma membrane, extracellular exosome,
GOTERM_MF_DIRECT	semaphorin receptor activity,
INTERPRO	Semaphorin/CD100 antigen, Plexin, Cell surface receptor IPT/TIG, Rho GTPase activation protein, Plexin, cytoplasmic RasGAP domain, Immunoglobulin-like fold, Immunoglobulin E-set, WD40/YVTN repeat-like-containing domain, Plexin-like fold,
KEGG_PATHWAY	Axon guidance,
SMART	PSI, IPT, Sema,
UP_KEYWORDS	Coiled coil, Complete proteome, Disulfide bond, Membrane, Reference proteome, Repeat, Signal, Transmembrane, Transmembrane helix,
ENSBTAG00000023529	sperm flagellar 2(SPEF2)	Related Genes	Bos taurus
GOTERM_BP_DIRECT	immune system development, spermatogenesis, fertilization, multicellular organism aging, axoneme assembly, embryonic neurocranium morphogenesis, brain morphogenesis, respiratory system development,
GOTERM_CC_DIRECT	manchette, Golgi apparatus, motile cilium, sperm midpiece,
INTERPRO	Calponin homology domain, Protein of unknown function DUF1042, EF-hand-like domain, P-loop containing nucleoside triphosphate hydrolase,
UP_KEYWORDS	Cell projection, Cilium, Coiled coil, Complete proteome, Flagellum, Reference proteome,
ENSBTAG00000010605	ventral anterior homeobox 2(VAX2)	Related Genes	Bos taurus
GOTERM_BP_DIRECT	axonogenesis, visual perception, dorsal/ventral axis specification, forebrain development, embryonic eye morphogenesis, retina development in camera-type eye,
GOTERM_CC_DIRECT	nucleus, cytoplasm,
GOTERM_MF_DIRECT	RNA polymerase II intronic transcription regulatory region sequence-specific DNA binding, transcriptional repressor activity, RNA polymerase II transcription regulatory region sequence-specific binding, chromatin DNA binding,
INTERPRO	Helix-turn-helix motif, Homeodomain, Homeodomain-like, Homeobox, conserved site, Homeodomain, metazoa,
SMART	HOX,
UP_KEYWORDS	Complete proteome, DNA-binding, Homeobox, Nucleus, Reference proteome,

## Sheet: Haplotypes_LD0.50
Functional Annotation Table
Help and Manual
Current Gene List: List_1
Current Background: Bos taurus
5 DAVID IDs
5 record(s)	Download File
ENSBTAG00000019071	COMM domain containing 10(COMMD10)	Related Genes	Bos taurus
INTERPRO	COMM domain,
UP_KEYWORDS	Complete proteome, Reference proteome,
ENSBTAG00000021537	RWD domain containing 3(RWDD3)	Related Genes	Bos taurus
GOTERM_BP_DIRECT	negative regulation of NF-kappaB transcription factor activity, positive regulation of protein sumoylation, positive regulation of hypoxia-inducible factor-1alpha signaling pathway,
GOTERM_CC_DIRECT	nucleus, cytoplasm,
INTERPRO	RWD domain, Ubiquitin-conjugating enzyme/RWD-like,
SMART	RWD,
UP_KEYWORDS	Complete proteome, Cytoplasm, Nucleus, Reference proteome,
UP_SEQ_FEATURE	chain:RWD domain-containing protein 3, domain:RWD,
ENSBTAG00000004411	cysteine rich secretory protein LCCL domain containing 1(CRISPLD1)	Related Genes	Bos taurus
GOTERM_BP_DIRECT	face morphogenesis,
GOTERM_CC_DIRECT	extracellular exosome,
INTERPRO	Allergen V5/Tpx-1-related, LCCL, CAP domain, Allergen V5/Tpx-1-related, conserved site,
SMART	SCP, LCCL,
UP_KEYWORDS	Complete proteome, Reference proteome,
ENSBTAG00000001124	galactosylceramidase(GALC)	Related Genes	Bos taurus
GOTERM_BP_DIRECT	carbohydrate metabolic process, galactosylceramide catabolic process,
GOTERM_CC_DIRECT	mitochondrion,
GOTERM_MF_DIRECT	galactosylceramidase activity,
INTERPRO	Glycoside hydrolase, family 59, Glycoside hydrolase, catalytic domain, Glycoside hydrolase, superfamily,
KEGG_PATHWAY	Sphingolipid metabolism, Metabolic pathways, Lysosome,
UP_KEYWORDS	Complete proteome, Reference proteome,
ENSBTAG00000023529	sperm flagellar 2(SPEF2)	Related Genes	Bos taurus
GOTERM_BP_DIRECT	immune system development, spermatogenesis, fertilization, multicellular organism aging, axoneme assembly, embryonic neurocranium morphogenesis, brain morphogenesis, respiratory system development,
GOTERM_CC_DIRECT	manchette, Golgi apparatus, motile cilium, sperm midpiece,
INTERPRO	Calponin homology domain, Protein of unknown function DUF1042, EF-hand-like domain, P-loop containing nucleoside triphosphate hydrolase,
UP_KEYWORDS	Cell projection, Cilium, Coiled coil, Complete proteome, Flagellum, Reference proteome,

## Sheet: Haplotypes_LD0.80
Functional Annotation Table
Help and Manual
Current Gene List: List_1
Current Background: Bos taurus
5 DAVID IDs
5 record(s)	Download File
ENSBTAG00000004411	cysteine rich secretory protein LCCL domain containing 1(CRISPLD1)	Related Genes	Bos taurus
GOTERM_BP_DIRECT	face morphogenesis,
GOTERM_CC_DIRECT	extracellular exosome,
INTERPRO	Allergen V5/Tpx-1-related, LCCL, CAP domain, Allergen V5/Tpx-1-related, conserved site,
SMART	SCP, LCCL,
UP_KEYWORDS	Complete proteome, Reference proteome,
ENSBTAG00000031890	dedicator of cytokinesis 1(DOCK1)	Related Genes	Bos taurus
GOTERM_BP_DIRECT	hematopoietic progenitor cell differentiation, cytoskeleton organization, small GTPase mediated signal transduction, cell migration,
GOTERM_CC_DIRECT	intracellular,
GOTERM_MF_DIRECT	guanyl-nucleotide exchange factor activity, GTPase activator activity,
INTERPRO	Src homology-3 domain, Dedicator of cytokinesis C-terminal, Armadillo-type fold, Dedicator of cytokinesis, DHR-1 domain, DHR-2 domain,
KEGG_PATHWAY	Focal adhesion, Regulation of actin cytoskeleton, Bacterial invasion of epithelial cells,
SMART	SH3,
UP_KEYWORDS	Complete proteome, Reference proteome,
ENSBTAG00000021945	nidogen 2(NID2)	Related Genes	Bos taurus
GOTERM_BP_DIRECT	cell-matrix adhesion,
GOTERM_CC_DIRECT	basement membrane, extracellular exosome,
GOTERM_MF_DIRECT	calcium ion binding,
INTERPRO	LDLR class B repeat, EGF-type aspartate/asparagine hydroxylation site, Thyroglobulin type-1, Epidermal growth factor-like domain, EGF-like calcium-binding, Nidogen, extracellular domain, G2 nidogen/fibulin G2F, Green fluorescent protein, Insulin-like growth factor binding protein, N-terminal, Six-bladed beta-propeller, TolB-like, EGF-like, conserved site, EGF-like calcium-binding, conserved site,…
SMART	LY, EGF_CA, EGF, TY, NIDO, G2F,
UP_KEYWORDS	Calcium, Complete proteome, Disulfide bond, EGF-like domain, Reference proteome, Repeat, Signal,
ENSBTAG00000019347	plexin domain containing 1(PLXDC1)	Related Genes	Bos taurus
GOTERM_BP_DIRECT	angiogenesis,
GOTERM_CC_DIRECT	cytoplasm, plasma membrane, integral component of membrane, receptor complex,
UP_KEYWORDS	Complete proteome, Membrane, Reference proteome, Signal, Transmembrane, Transmembrane helix,
ENSBTAG00000023529	sperm flagellar 2(SPEF2)	Related Genes	Bos taurus
GOTERM_BP_DIRECT	immune system development, spermatogenesis, fertilization, multicellular organism aging, axoneme assembly, embryonic neurocranium morphogenesis, brain morphogenesis, respiratory system development,
GOTERM_CC_DIRECT	manchette, Golgi apparatus, motile cilium, sperm midpiece,
INTERPRO	Calponin homology domain, Protein of unknown function DUF1042, EF-hand-like domain, P-loop containing nucleoside triphosphate hydrolase,
UP_KEYWORDS	Cell projection, Cilium, Coiled coil, Complete proteome, Flagellum, Reference proteome,
