# Supplementary material for: Haplotype-Based Single-Step GWAS for Yearling Temperament in American Angus Cattle
Source: Genes (Basel). 2021 Dec 22;13(1):17. doi: 10.3390/genes13010017 (PMC8775055; doi:10.3390/genes13010017)
Supplement: Supplementary file 1 [file genes-13-00017-s001.zip › genes-1492001-supplementary/Supplementary_File_S7.xlsx]

## Sheet: SNP_Haplotypes_LD0.15
Functional Annotation Table
Help and Manual
Current Gene List: List_1
Current Background: Bos taurus
19 DAVID IDs
18 record(s)	Download File
ENSBTAG00000025718	3-hydroxymethyl-3-methylglutaryl-CoA lyase like 1(HMGCLL1)	Related Genes	Bos taurus
GOTERM_BP_DIRECT	ketone body biosynthetic process,
GOTERM_CC_DIRECT	endoplasmic reticulum, cytosol, membrane, perinuclear region of cytoplasm,
GOTERM_MF_DIRECT	hydroxymethylglutaryl-CoA lyase activity,
INTERPRO	Pyruvate carboxyltransferase, Aldolase-type TIM barrel,
KEGG_PATHWAY	Synthesis and degradation of ketone bodies, Valine, leucine and isoleucine degradation, Butanoate metabolism, Metabolic pathways, Peroxisome,
UP_KEYWORDS	Complete proteome, Reference proteome,
ENSBTAG00000010620	ATPase H+ transporting V1 subunit B1(ATP6V1B1)	Related Genes	Bos taurus
GOTERM_BP_DIRECT	ossification, regulation of pH, excretion, sensory perception of sound, ATP hydrolysis coupled proton transport, proton transport, inner ear morphogenesis, pH reduction, ATP metabolic process, calcium ion homeostasis,
GOTERM_CC_DIRECT	cytoplasm, cytosol, microvillus, basolateral plasma membrane, apical plasma membrane, lateral plasma membrane, vacuolar proton-transporting V-type ATPase complex, proton-transporting V-type ATPase, V1 domain, extracellular exosome,
GOTERM_MF_DIRECT	ATP binding, hydrogen ion transmembrane transporter activity, hydrolase activity, acting on acid anhydrides, catalyzing transmembrane movement of substances,
INTERPRO	ATPase, F1/V1/A1 complex, alpha/beta subunit, nucleotide-binding domain, ATPase, alpha/beta subunit, N-terminal, ATPase, V1 complex, subunit B, ATPase, alpha/beta subunit, nucleotide-binding domain, active site, V-type ATP synthase regulatory subunit B/beta, P-loop containing nucleoside triphosphate hydrolase,
KEGG_PATHWAY	Oxidative phosphorylation, Metabolic pathways, Phagosome, Synaptic vesicle cycle, Collecting duct acid secretion, Rheumatoid arthritis,
UP_KEYWORDS	Cell membrane, Complete proteome, Direct protein sequencing, Hydrogen ion transport, Hydrolase, Ion transport, Membrane, Reference proteome, Transport,
UP_SEQ_FEATURE	chain:V-type proton ATPase subunit B, kidney isoform, short sequence motif:PDZ-binding,
ENSBTAG00000010623	ankyrin repeat domain 53(ANKRD53)	Related Genes	Bos taurus
GOTERM_BP_DIRECT	mitotic metaphase plate congression, positive regulation of microtubule polymerization, regulation of mitotic spindle organization, regulation of mitotic cytokinesis,
GOTERM_CC_DIRECT	spindle pole,
INTERPRO	Ankyrin repeat, Ankyrin repeat-containing domain,
SMART	ANK,
UP_KEYWORDS	ANK repeat, Complete proteome, Reference proteome,
ENSBTAG00000013117	calcium voltage-gated channel auxiliary subunit alpha2delta 3(CACNA2D3)	Related Genes	Bos taurus
GOTERM_BP_DIRECT	regulation of calcium ion transport, calcium ion transmembrane transport,
GOTERM_CC_DIRECT	voltage-gated calcium channel complex,
GOTERM_MF_DIRECT	calcium channel regulator activity,
INTERPRO	von Willebrand factor, type A, VWA N-terminal, Voltage-dependent calcium channel, alpha-2/delta subunit, conserved region,
KEGG_PATHWAY	MAPK signaling pathway, Cardiac muscle contraction, Adrenergic signaling in cardiomyocytes, Oxytocin signaling pathway, Hypertrophic cardiomyopathy (HCM), Arrhythmogenic right ventricular cardiomyopathy (ARVC), Dilated cardiomyopathy,
SMART	VWA,
UP_KEYWORDS	Complete proteome, Reference proteome,
ENSBTAG00000031890	dedicator of cytokinesis 1(DOCK1)	Related Genes	Bos taurus
GOTERM_BP_DIRECT	hematopoietic progenitor cell differentiation, cytoskeleton organization, small GTPase mediated signal transduction, cell migration,
GOTERM_CC_DIRECT	intracellular,
GOTERM_MF_DIRECT	guanyl-nucleotide exchange factor activity, GTPase activator activity,
INTERPRO	Src homology-3 domain, Dedicator of cytokinesis C-terminal, Armadillo-type fold, Dedicator of cytokinesis, DHR-1 domain, DHR-2 domain,
KEGG_PATHWAY	Focal adhesion, Regulation of actin cytoskeleton, Bacterial invasion of epithelial cells,
SMART	SH3,
UP_KEYWORDS	Complete proteome, Reference proteome,
ENSBTAG00000012222	fatty acid 2-hydroxylase(FA2H)	Related Genes	Bos taurus
GOTERM_BP_DIRECT	sebaceous gland cell differentiation, fatty acid metabolic process, fatty acid biosynthetic process, lipid modification, central nervous system myelin maintenance, peripheral nervous system myelin maintenance, regulation of cell proliferation, regulation of hair cycle,
GOTERM_CC_DIRECT	endoplasmic reticulum, endoplasmic reticulum membrane, integral component of membrane,
GOTERM_MF_DIRECT	iron ion binding, fatty acid alpha-hydroxylase activity,
INTERPRO	Cytochrome b5-like heme/steroid binding domain, Fatty acid hydroxylase, Inositolphosphorylceramide-B hydroxylase,
PIR_SUPERFAMILY	inositolphosphorylceramide-B hydroxylase,
SMART	SM01117,
UP_KEYWORDS	Complete proteome, Endoplasmic reticulum, Fatty acid biosynthesis, Fatty acid metabolism, Iron, Lipid biosynthesis, Lipid metabolism, Membrane, Metal-binding, Oxidoreductase, Reference proteome, Transmembrane, Transmembrane helix,
ENSBTAG00000014211	forkhead box P4(FOXP4)	Related Genes	Bos taurus
COG_ONTOLOGY	Transcription,
GOTERM_BP_DIRECT	transcription, DNA-templated,
GOTERM_CC_DIRECT	nucleus,
GOTERM_MF_DIRECT	RNA polymerase II transcription factor activity, sequence-specific DNA binding, sequence-specific DNA binding,
INTERPRO	Transcription factor, fork head, Winged helix-turn-helix DNA-binding domain,
SMART	FH,
UP_KEYWORDS	Complete proteome, DNA-binding, Nucleus, Reference proteome, Transcription,
ENSBTAG00000007989	fucosyltransferase 9(FUT9)	Related Genes	Bos taurus
GOTERM_BP_DIRECT	protein glycosylation, protein N-linked glycosylation, fucosylation,
GOTERM_CC_DIRECT	Golgi membrane, integral component of membrane, Golgi cisterna membrane,
GOTERM_MF_DIRECT	alpha-(1->3)-fucosyltransferase activity,
INTERPRO	Glycosyl transferase, family 10,
KEGG_PATHWAY	Glycosphingolipid biosynthesis - lacto and neolacto series, Glycosphingolipid biosynthesis - globo series, Metabolic pathways,
UP_KEYWORDS	Complete proteome, Glycoprotein, Glycosyltransferase, Golgi apparatus, Membrane, Reference proteome, Signal-anchor, Transferase, Transmembrane, Transmembrane helix,
UP_SEQ_FEATURE	chain:Alpha-(1,3)-fucosyltransferase, glycosylation site:N-linked (GlcNAc...), topological domain:Cytoplasmic, topological domain:Lumenal, transmembrane region,
ENSBTAG00000016284	interleukin 7(IL7)	Related Genes	Bos taurus
GOTERM_BP_DIRECT	T cell lineage commitment, immune response, humoral immune response, cell-cell signaling, organ morphogenesis, regulation of gene expression, positive regulation of B cell proliferation, negative regulation of apoptotic process, negative regulation of catalytic activity, bone resorption, positive regulation of T cell differentiation, positive regulation of organ growth, homeostasis of number of c…
GOTERM_CC_DIRECT	extracellular space,
GOTERM_MF_DIRECT	cytokine activity, interleukin-7 receptor binding, growth factor activity,
INTERPRO	Interleukin-7/interleukin-9, Interleukin-7, Interleukin-7/-9, conserved site,
KEGG_PATHWAY	Cytokine-cytokine receptor interaction, PI3K-Akt signaling pathway, Jak-STAT signaling pathway, Hematopoietic cell lineage,
PIR_SUPERFAMILY	interleukin-7,
SMART	IL7,
UP_KEYWORDS	Complete proteome, Cytokine, Disulfide bond, Glycoprotein, Growth factor, Reference proteome, Secreted, Signal,
UP_SEQ_FEATURE	chain:Interleukin-7, disulfide bond, glycosylation site:N-linked (GlcNAc...), signal peptide,
ENSBTAG00000013685	keratin 31(KRT31)	Related Genes	Bos taurus
GOTERM_CC_DIRECT	intermediate filament,
GOTERM_MF_DIRECT	structural molecule activity,
INTERPRO	Intermediate filament protein, Keratin, type I, Intermediate filament protein, conserved site,
SMART	SM01391,
UP_KEYWORDS	Coiled coil, Complete proteome, Intermediate filament, Keratin, Reference proteome,
ENSBTAG00000037560	keratin 34(KRT34)	Related Genes	Bos taurus
GOTERM_CC_DIRECT	intermediate filament,
GOTERM_MF_DIRECT	structural molecule activity,
INTERPRO	Intermediate filament protein, Keratin, type I, Intermediate filament protein, conserved site,
SMART	SM01391,
UP_KEYWORDS	Coiled coil, Complete proteome, Intermediate filament, Keratin, Reference proteome,
ENSBTAG00000012216	mixed lineage kinase domain like(MLKL)	Related Genes	Bos taurus
GOTERM_BP_DIRECT	protein homotrimerization, necroptotic process,
GOTERM_CC_DIRECT	cytoplasm, plasma membrane,
GOTERM_MF_DIRECT	protein kinase activity, ATP binding,
INTERPRO	Protein kinase, catalytic domain, Serine-threonine/tyrosine-protein kinase catalytic domain, Protein kinase-like domain,
KEGG_PATHWAY	TNF signaling pathway,
UP_KEYWORDS	Complete proteome, Reference proteome,
ENSBTAG00000009159	plexin A1(PLXNA1)	Related Genes	Bos taurus
GOTERM_BP_DIRECT	regulation of smooth muscle cell migration, branchiomotor neuron axon guidance, regulation of cell migration, regulation of axon extension involved in axon guidance, dichotomous subdivision of terminal units involved in salivary gland branching, semaphorin-plexin signaling pathway involved in axon guidance, neuron projection extension,
GOTERM_CC_DIRECT	semaphorin receptor complex, nucleus, cytoplasm, integral component of plasma membrane, extracellular exosome,
GOTERM_MF_DIRECT	semaphorin receptor activity,
INTERPRO	Semaphorin/CD100 antigen, Plexin, Cell surface receptor IPT/TIG, Rho GTPase activation protein, Plexin, cytoplasmic RasGAP domain, Immunoglobulin-like fold, Immunoglobulin E-set, WD40/YVTN repeat-like-containing domain, Plexin-like fold,
KEGG_PATHWAY	Axon guidance,
SMART	PSI, IPT, Sema,
UP_KEYWORDS	Coiled coil, Complete proteome, Disulfide bond, Membrane, Reference proteome, Repeat, Signal, Transmembrane, Transmembrane helix,
ENSBTAG00000023144	protein tyrosine phosphatase, receptor type C(PTPRC)	Related Genes	Bos taurus
GOTERM_BP_DIRECT	T cell receptor signaling pathway,
GOTERM_CC_DIRECT	integral component of membrane,
GOTERM_MF_DIRECT	protein tyrosine phosphatase activity,
INTERPRO	Protein-tyrosine phosphatase, receptor/non-receptor type, Protein-tyrosine/Dual specificity phosphatase, Protein-tyrosine phosphatase, catalytic, Fibronectin, type III, Immunoglobulin-like fold, Protein-tyrosine phosphatase, active site, Leukocyte common antigen, Protein tyrosine phosphatase, receptor type, N-terminal,
KEGG_PATHWAY	Cell adhesion molecules (CAMs), T cell receptor signaling pathway, Fc gamma R-mediated phagocytosis, Primary immunodeficiency,
SMART	FN3, PTPc, PTPc_motif,
UP_KEYWORDS	Complete proteome, Hydrolase, Membrane, Protein phosphatase, Proteomics identification, Reference proteome, Signal, Transmembrane, Transmembrane helix,
ENSBTAG00000015837	purinergic receptor P2Y12(P2RY12)	Related Genes	Bos taurus
GOTERM_BP_DIRECT	substrate-dependent cell migration, cell extension, adenylate cyclase-inhibiting G-protein coupled receptor signaling pathway, positive regulation of ion transport, platelet aggregation, cellular response to ATP, regulation of microglial cell migration,
GOTERM_CC_DIRECT	integral component of plasma membrane, cell surface,
GOTERM_MF_DIRECT	G-protein coupled adenosine receptor activity, ADP receptor activity, G-protein coupled purinergic nucleotide receptor activity,
INTERPRO	G protein-coupled receptor, rhodopsin-like, P2Y12 purinoceptor, GPCR, rhodopsin-like, 7TM,
KEGG_PATHWAY	Platelet activation,
UP_KEYWORDS	Complete proteome, Membrane, Receptor, Reference proteome, Transmembrane, Transmembrane helix,
ENSBTAG00000023529	sperm flagellar 2(SPEF2)	Related Genes	Bos taurus
GOTERM_BP_DIRECT	immune system development, spermatogenesis, fertilization, multicellular organism aging, axoneme assembly, embryonic neurocranium morphogenesis, brain morphogenesis, respiratory system development,
GOTERM_CC_DIRECT	manchette, Golgi apparatus, motile cilium, sperm midpiece,
INTERPRO	Calponin homology domain, Protein of unknown function DUF1042, EF-hand-like domain, P-loop containing nucleoside triphosphate hydrolase,
UP_KEYWORDS	Cell projection, Cilium, Coiled coil, Complete proteome, Flagellum, Reference proteome,
ENSBTAG00000032121	succinyl-CoA:glutarate-CoA transferase(SUGCT)	Related Genes	Bos taurus
GOTERM_CC_DIRECT	mitochondrion,
GOTERM_MF_DIRECT	succinate-hydroxymethylglutarate CoA-transferase activity,
INTERPRO	CoA-transferase family III, CoA-transferase family III domain,
UP_KEYWORDS	Complete proteome, Reference proteome,
ENSBTAG00000010605	ventral anterior homeobox 2(VAX2)	Related Genes	Bos taurus
GOTERM_BP_DIRECT	axonogenesis, visual perception, dorsal/ventral axis specification, forebrain development, embryonic eye morphogenesis, retina development in camera-type eye,
GOTERM_CC_DIRECT	nucleus, cytoplasm,
GOTERM_MF_DIRECT	RNA polymerase II intronic transcription regulatory region sequence-specific DNA binding, transcriptional repressor activity, RNA polymerase II transcription regulatory region sequence-specific binding, chromatin DNA binding,
INTERPRO	Helix-turn-helix motif, Homeodomain, Homeodomain-like, Homeobox, conserved site, Homeodomain, metazoa,
SMART	HOX,
UP_KEYWORDS	Complete proteome, DNA-binding, Homeobox, Nucleus, Reference proteome,

## Sheet: SNP_Haplotypes_LD0.50
Functional Annotation Table
Help and Manual
Current Gene List: List_1
Current Background: Bos taurus
36 DAVID IDs
36 record(s)	Download File
ENSBTAG00000025718	3-hydroxymethyl-3-methylglutaryl-CoA lyase like 1(HMGCLL1)	Related Genes	Bos taurus
GOTERM_BP_DIRECT	ketone body biosynthetic process,
GOTERM_CC_DIRECT	endoplasmic reticulum, cytosol, membrane, perinuclear region of cytoplasm,
GOTERM_MF_DIRECT	hydroxymethylglutaryl-CoA lyase activity,
INTERPRO	Pyruvate carboxyltransferase, Aldolase-type TIM barrel,
KEGG_PATHWAY	Synthesis and degradation of ketone bodies, Valine, leucine and isoleucine degradation, Butanoate metabolism, Metabolic pathways, Peroxisome,
UP_KEYWORDS	Complete proteome, Reference proteome,
ENSBTAG00000014752	A-kinase anchoring protein 11(AKAP11)	Related Genes	Bos taurus
GOTERM_BP_DIRECT	regulation of protein kinase A signaling,
GOTERM_CC_DIRECT	peroxisome,
GOTERM_MF_DIRECT	protein kinase A binding,
INTERPRO	SPHK1-interactor/A-kinase anchor 110kDa,
UP_KEYWORDS	Complete proteome, Reference proteome,
ENSBTAG00000005481	ADAM metallopeptidase domain 10(ADAM10)	Related Genes	Bos taurus
GOTERM_BP_DIRECT	in utero embryonic development, protein phosphorylation, membrane protein ectodomain proteolysis, negative regulation of cell adhesion, Notch signaling pathway, positive regulation of cell proliferation, positive regulation of T cell chemotaxis, protein processing, positive regulation of cell growth, response to tumor necrosis factor, monocyte activation, PMA-inducible membrane protein ectodomain…
GOTERM_CC_DIRECT	Golgi membrane, nucleus, cytoplasm, Golgi apparatus, Golgi-associated vesicle, focal adhesion, cell surface, postsynaptic density, integral component of membrane, extracellular exosome, perinuclear endoplasmic reticulum, tetraspanin-enriched microdomain,
GOTERM_MF_DIRECT	endopeptidase activity, metalloendopeptidase activity, protein binding, metallopeptidase activity, SH3 domain binding, protein kinase binding, protein homodimerization activity, metal ion binding,
INTERPRO	Peptidase M12B, ADAM/reprolysin, Blood coagulation inhibitor, Disintegrin, Peptidase M12B, propeptide, Metallopeptidase, catalytic domain, Disintegrin and metalloproteinase domain-containing protein 10,
KEGG_PATHWAY	Alzheimer's disease,
SMART	DISIN,
UP_KEYWORDS	3D-structure, Cell membrane, Cleavage on pair of basic residues, Complete proteome, Direct protein sequencing, Disulfide bond, Glycoprotein, Golgi apparatus, Hydrolase, Membrane, Metal-binding, Metalloprotease, Notch signaling pathway, Phosphoprotein, Protease, Reference proteome, SH3-binding, Signal, Transmembrane, Transmembrane helix, Zinc, Zymogen,
UP_SEQ_FEATURE	chain:Disintegrin and metalloproteinase domain- containing protein 10, compositionally biased region:Cys-rich, disulfide bond, domain:Disintegrin, domain:Peptidase M12B, glycosylation site:N-linked (GlcNAc...), helix, metal ion-binding site:Zinc; catalytic, metal ion-binding site:Zinc; in inhibited form, mutagenesis site, short sequence motif:Cysteine switch, short sequence motif:SH3-binding, sig…
ENSBTAG00000010411	ADAM metallopeptidase with thrombospondin type 1 motif 8(ADAMTS8)	Related Genes	Bos taurus
GOTERM_CC_DIRECT	proteinaceous extracellular matrix,
GOTERM_MF_DIRECT	metalloendopeptidase activity, zinc ion binding,
INTERPRO	Thrombospondin, type 1 repeat, Peptidase M12B, ADAM/reprolysin, Peptidase M12B, propeptide, ADAM-TS Spacer 1, Peptidase M12B, ADAM-TS, Peptidase M12B, ADAM-TS8, Metallopeptidase, catalytic domain,
SMART	TSP1,
UP_KEYWORDS	Coiled coil, Complete proteome, Disulfide bond, Reference proteome, Signal,
ENSBTAG00000010620	ATPase H+ transporting V1 subunit B1(ATP6V1B1)	Related Genes	Bos taurus
GOTERM_BP_DIRECT	ossification, regulation of pH, excretion, sensory perception of sound, ATP hydrolysis coupled proton transport, proton transport, inner ear morphogenesis, pH reduction, ATP metabolic process, calcium ion homeostasis,
GOTERM_CC_DIRECT	cytoplasm, cytosol, microvillus, basolateral plasma membrane, apical plasma membrane, lateral plasma membrane, vacuolar proton-transporting V-type ATPase complex, proton-transporting V-type ATPase, V1 domain, extracellular exosome,
GOTERM_MF_DIRECT	ATP binding, hydrogen ion transmembrane transporter activity, hydrolase activity, acting on acid anhydrides, catalyzing transmembrane movement of substances,
INTERPRO	ATPase, F1/V1/A1 complex, alpha/beta subunit, nucleotide-binding domain, ATPase, alpha/beta subunit, N-terminal, ATPase, V1 complex, subunit B, ATPase, alpha/beta subunit, nucleotide-binding domain, active site, V-type ATP synthase regulatory subunit B/beta, P-loop containing nucleoside triphosphate hydrolase,
KEGG_PATHWAY	Oxidative phosphorylation, Metabolic pathways, Phagosome, Synaptic vesicle cycle, Collecting duct acid secretion, Rheumatoid arthritis,
UP_KEYWORDS	Cell membrane, Complete proteome, Direct protein sequencing, Hydrogen ion transport, Hydrolase, Ion transport, Membrane, Reference proteome, Transport,
UP_SEQ_FEATURE	chain:V-type proton ATPase subunit B, kidney isoform, short sequence motif:PDZ-binding,
ENSBTAG00000047560	C2 calcium dependent domain containing 4C(C2CD4C)	Related Genes	Bos taurus
GOTERM_CC_DIRECT	plasma membrane,
GOTERM_MF_DIRECT	calcium ion binding, calcium-dependent phospholipid binding,
INTERPRO	C2 calcium-dependent membrane targeting,
SMART	C2,
UP_KEYWORDS	Complete proteome, Reference proteome,
ENSBTAG00000008114	CD99 molecule(CD99)	Related Genes	Bos taurus
GOTERM_CC_DIRECT	focal adhesion, integral component of membrane,
INTERPRO	CD99 antigen-like protein 2,
KEGG_PATHWAY	Cell adhesion molecules (CAMs), Leukocyte transendothelial migration,
UP_KEYWORDS	Complete proteome, Membrane, Proteomics identification, Reference proteome, Signal, Transmembrane, Transmembrane helix,
ENSBTAG00000005784	CUB and Sushi multiple domains 2(CSMD2)	Related Genes	Bos taurus
GOTERM_CC_DIRECT	integral component of membrane,
INTERPRO	Sushi/SCR/CCP, CUB domain,
SMART	CCP, CUB,
UP_KEYWORDS	Complete proteome, Disulfide bond, Membrane, Reference proteome, Transmembrane, Transmembrane helix,
ENSBTAG00000011981	MYB proto-oncogene like 1(MYBL1)	Related Genes	Bos taurus
GOTERM_BP_DIRECT	regulation of transcription from RNA polymerase II promoter, cell differentiation,
GOTERM_CC_DIRECT	nucleus,
GOTERM_MF_DIRECT	RNA polymerase II core promoter proximal region sequence-specific DNA binding, RNA polymerase II transcription factor activity, sequence-specific DNA binding, transcriptional activator activity, RNA polymerase II core promoter proximal region sequence-specific binding, transcription factor activity, RNA polymerase II transcription factor recruiting, sequence-specific DNA binding, transcription re…
INTERPRO	SANT/Myb domain, Homeodomain-like, Transcription regulator Wos2-domain, C-myb, C-terminal, Myb-like domain, Myb domain,
SMART	SANT,
UP_KEYWORDS	Complete proteome, Reference proteome,
ENSBTAG00000016747	N-acetyltransferase 10(NAT10)	Related Genes	Bos taurus
COG_ONTOLOGY	General function prediction only,
GOTERM_BP_DIRECT	rRNA modification, negative regulation of telomere maintenance via telomerase, ribosomal small subunit biogenesis, tRNA acetylation,
GOTERM_CC_DIRECT	nuclear chromosome, telomeric region, telomerase holoenzyme complex, nucleolus, membrane,
GOTERM_MF_DIRECT	ATP binding, N-acetyltransferase activity, poly(A) RNA binding,
INTERPRO	GNAT domain, Helicase domain, Domain of unknown function DUF1726, Acyl-CoA N-acyltransferase,
KEGG_PATHWAY	Ribosome biogenesis in eukaryotes,
UP_KEYWORDS	Acyltransferase, ATP-binding, Complete proteome, Nucleotide-binding, Nucleus, Reference proteome, rRNA processing, Transferase, tRNA processing,
ENSBTAG00000021537	RWD domain containing 3(RWDD3)	Related Genes	Bos taurus
GOTERM_BP_DIRECT	negative regulation of NF-kappaB transcription factor activity, positive regulation of protein sumoylation, positive regulation of hypoxia-inducible factor-1alpha signaling pathway,
GOTERM_CC_DIRECT	nucleus, cytoplasm,
INTERPRO	RWD domain, Ubiquitin-conjugating enzyme/RWD-like,
SMART	RWD,
UP_KEYWORDS	Complete proteome, Cytoplasm, Nucleus, Reference proteome,
UP_SEQ_FEATURE	chain:RWD domain-containing protein 3, domain:RWD,
ENSBTAG00000001186	SH2 domain containing 4A(SH2D4A)	Related Genes	Bos taurus
GOTERM_BP_DIRECT	negative regulation of phosphatase activity,
GOTERM_CC_DIRECT	cytoplasm,
INTERPRO	SH2 domain,
SMART	SH2,
UP_KEYWORDS	Complete proteome, Reference proteome,
ENSBTAG00000003555	THADA, armadillo repeat containing(THADA)	Related Genes	Bos taurus
COG_ONTOLOGY	Function unknown,
INTERPRO	Armadillo-type fold, Domain of unknown function DUF2428, death-receptor-like,
UP_KEYWORDS	Coiled coil, Complete proteome, Reference proteome,
ENSBTAG00000005923	ankyrin repeat and BTB domain containing 2(ABTB2)	Related Genes	Bos taurus
GOTERM_BP_DIRECT	regulation of proteolysis, protein ubiquitination involved in ubiquitin-dependent protein catabolic process, proteasome-mediated ubiquitin-dependent protein catabolic process, cellular response to toxic substance,
GOTERM_CC_DIRECT	nucleoplasm, cytoplasm, SCF ubiquitin ligase complex,
GOTERM_MF_DIRECT	ubiquitin protein ligase binding,
INTERPRO	BTB/POZ-like, Ankyrin repeat, Histone-fold, BTB/POZ fold, Ankyrin repeat-containing domain,
SMART	BTB, ANK,
UP_KEYWORDS	ANK repeat, Complete proteome, Reference proteome,
ENSBTAG00000010623	ankyrin repeat domain 53(ANKRD53)	Related Genes	Bos taurus
GOTERM_BP_DIRECT	mitotic metaphase plate congression, positive regulation of microtubule polymerization, regulation of mitotic spindle organization, regulation of mitotic cytokinesis,
GOTERM_CC_DIRECT	spindle pole,
INTERPRO	Ankyrin repeat, Ankyrin repeat-containing domain,
SMART	ANK,
UP_KEYWORDS	ANK repeat, Complete proteome, Reference proteome,
ENSBTAG00000009351	ataxin 10(ATXN10)	Related Genes	Bos taurus
GOTERM_BP_DIRECT	neuron projection development, cilium assembly,
GOTERM_CC_DIRECT	extracellular space, plasma membrane, dendrite, neuronal cell body, perinuclear region of cytoplasm,
INTERPRO	Armadillo-like helical, Armadillo-type fold, Ataxin-10 domain,
UP_KEYWORDS	Complete proteome, Cytoplasm, Methylation, Phosphoprotein, Reference proteome,
UP_SEQ_FEATURE	chain:Ataxin-10,
ENSBTAG00000001325	beta-ureidopropionase 1(UPB1)	Related Genes	Bos taurus
COG_ONTOLOGY	General function prediction only,
GOTERM_BP_DIRECT	nitrogen compound metabolic process,
GOTERM_CC_DIRECT	extracellular exosome,
GOTERM_MF_DIRECT	beta-ureidopropionase activity,
INTERPRO	Carbon-nitrogen hydrolase,
KEGG_PATHWAY	Pyrimidine metabolism, beta-Alanine metabolism, Pantothenate and CoA biosynthesis, Drug metabolism - other enzymes, Metabolic pathways,
UP_KEYWORDS	Complete proteome, Reference proteome,
ENSBTAG00000013117	calcium voltage-gated channel auxiliary subunit alpha2delta 3(CACNA2D3)	Related Genes	Bos taurus
GOTERM_BP_DIRECT	regulation of calcium ion transport, calcium ion transmembrane transport,
GOTERM_CC_DIRECT	voltage-gated calcium channel complex,
GOTERM_MF_DIRECT	calcium channel regulator activity,
INTERPRO	von Willebrand factor, type A, VWA N-terminal, Voltage-dependent calcium channel, alpha-2/delta subunit, conserved region,
KEGG_PATHWAY	MAPK signaling pathway, Cardiac muscle contraction, Adrenergic signaling in cardiomyocytes, Oxytocin signaling pathway, Hypertrophic cardiomyopathy (HCM), Arrhythmogenic right ventricular cardiomyopathy (ARVC), Dilated cardiomyopathy,
SMART	VWA,
UP_KEYWORDS	Complete proteome, Reference proteome,
ENSBTAG00000016744	cell cycle associated protein 1(CAPRIN1)	Related Genes	Bos taurus
GOTERM_BP_DIRECT	negative regulation of translation, positive regulation of dendrite morphogenesis, positive regulation of dendritic spine morphogenesis,
GOTERM_CC_DIRECT	cytoplasmic mRNA processing body, cytosol, cytoplasmic stress granule, membrane, dendrite,
GOTERM_MF_DIRECT	RNA binding, poly(A) RNA binding,
INTERPRO	Cytoplasmic activation/proliferation-associated protein-1 C term,
UP_KEYWORDS	Acetylation, Cell projection, Coiled coil, Complete proteome, Cytoplasm, Differentiation, Glycoprotein, Methylation, Phosphoprotein, Protein synthesis inhibitor, Proteomics identification, Reference proteome, RNA-binding,
UP_SEQ_FEATURE	chain:Caprin-1, modified residue, region of interest:G3BP1-binding,
ENSBTAG00000004864	centrosomal protein 89(CEP89)	Related Genes	Bos taurus
GOTERM_BP_DIRECT	mitochondrion organization, chemical synaptic transmission, nonmotile primary cilium assembly,
GOTERM_CC_DIRECT	spindle pole, centriole, plasma membrane, nonmotile primary cilium, motile cilium, ciliary transition fiber,
UP_KEYWORDS	Coiled coil, Complete proteome, Reference proteome,
ENSBTAG00000004411	cysteine rich secretory protein LCCL domain containing 1(CRISPLD1)	Related Genes	Bos taurus
GOTERM_BP_DIRECT	face morphogenesis,
GOTERM_CC_DIRECT	extracellular exosome,
INTERPRO	Allergen V5/Tpx-1-related, LCCL, CAP domain, Allergen V5/Tpx-1-related, conserved site,
SMART	SCP, LCCL,
UP_KEYWORDS	Complete proteome, Reference proteome,
ENSBTAG00000031890	dedicator of cytokinesis 1(DOCK1)	Related Genes	Bos taurus
GOTERM_BP_DIRECT	hematopoietic progenitor cell differentiation, cytoskeleton organization, small GTPase mediated signal transduction, cell migration,
GOTERM_CC_DIRECT	intracellular,
GOTERM_MF_DIRECT	guanyl-nucleotide exchange factor activity, GTPase activator activity,
INTERPRO	Src homology-3 domain, Dedicator of cytokinesis C-terminal, Armadillo-type fold, Dedicator of cytokinesis, DHR-1 domain, DHR-2 domain,
KEGG_PATHWAY	Focal adhesion, Regulation of actin cytoskeleton, Bacterial invasion of epithelial cells,
SMART	SH3,
UP_KEYWORDS	Complete proteome, Reference proteome,
ENSBTAG00000014211	forkhead box P4(FOXP4)	Related Genes	Bos taurus
COG_ONTOLOGY	Transcription,
GOTERM_BP_DIRECT	transcription, DNA-templated,
GOTERM_CC_DIRECT	nucleus,
GOTERM_MF_DIRECT	RNA polymerase II transcription factor activity, sequence-specific DNA binding, sequence-specific DNA binding,
INTERPRO	Transcription factor, fork head, Winged helix-turn-helix DNA-binding domain,
SMART	FH,
UP_KEYWORDS	Complete proteome, DNA-binding, Nucleus, Reference proteome, Transcription,
ENSBTAG00000001124	galactosylceramidase(GALC)	Related Genes	Bos taurus
GOTERM_BP_DIRECT	carbohydrate metabolic process, galactosylceramide catabolic process,
GOTERM_CC_DIRECT	mitochondrion,
GOTERM_MF_DIRECT	galactosylceramidase activity,
INTERPRO	Glycoside hydrolase, family 59, Glycoside hydrolase, catalytic domain, Glycoside hydrolase, superfamily,
KEGG_PATHWAY	Sphingolipid metabolism, Metabolic pathways, Lysosome,
UP_KEYWORDS	Complete proteome, Reference proteome,
ENSBTAG00000022022	guanylyl cyclase domain containing 1(GUCD1)	Related Genes	Bos taurus
INTERPRO	Guanylyl cyclase,
UP_KEYWORDS	Complete proteome, Reference proteome,
ENSBTAG00000044119	kinase suppressor of ras 2(KSR2)	Related Genes	Bos taurus
GOTERM_BP_DIRECT	intracellular signal transduction,
GOTERM_CC_DIRECT	intracellular,
GOTERM_MF_DIRECT	protein kinase activity, ATP binding, metal ion binding,
INTERPRO	Protein kinase, catalytic domain, Serine-threonine/tyrosine-protein kinase catalytic domain, Protein kinase C-like, phorbol ester/diacylglycerol binding, Serine/threonine-protein kinase, active site, Protein kinase-like domain, Kinase suppressor of RAS, SAM-like domain,
KEGG_PATHWAY	Ras signaling pathway,
SMART	C1, S_TKc,
UP_KEYWORDS	Complete proteome, Metal-binding, Reference proteome, Zinc,
ENSBTAG00000015913	malignant fibrous histiocytoma amplified sequence 1(MFHAS1)	Related Genes	Bos taurus
GOTERM_BP_DIRECT	small GTPase mediated signal transduction,
GOTERM_CC_DIRECT	intracellular,
GOTERM_MF_DIRECT	GTP binding,
INTERPRO	Leucine-rich repeat, Leucine-rich repeat, typical subtype, Mitochondrial Rho-like, ROC GTPase, P-loop containing nucleoside triphosphate hydrolase,
SMART	LRR_TYP,
UP_KEYWORDS	Complete proteome, Reference proteome,
ENSBTAG00000022150	matrix remodeling associated 5(MXRA5)	Related Genes	Bos taurus
COG_ONTOLOGY	Function unknown,
GOTERM_CC_DIRECT	extracellular exosome,
INTERPRO	Leucine-rich repeat-containing N-terminal, Cysteine-rich flanking region, C-terminal, Leucine-rich repeat, Leucine-rich repeat, typical subtype, Immunoglobulin subtype 2, Immunoglobulin subtype, Immunoglobulin-like domain, Immunoglobulin I-set, Immunoglobulin V-set, Immunoglobulin-like fold,
SMART	LRRNT, LRRCT, LRR_TYP, IGv, IGc2, IG,
UP_KEYWORDS	Complete proteome, Disulfide bond, Leucine-rich repeat, Reference proteome, Repeat, Signal,
ENSBTAG00000000789	protein phosphatase 1 regulatory subunit 7(PPP1R7)	Related Genes	Bos taurus
COG_ONTOLOGY	Function unknown,
GOTERM_BP_DIRECT	chromosome segregation, positive regulation of protein dephosphorylation,
GOTERM_CC_DIRECT	nucleus, chromosome, extracellular exosome,
INTERPRO	Leucine-rich repeat, Leucine-rich repeat, typical subtype, U2A'/phosphoprotein 32 family A, C-terminal,
SMART	LRR_TYP, LRRcap,
UP_KEYWORDS	Acetylation, Complete proteome, Direct protein sequencing, Leucine-rich repeat, Nucleus, Phosphoprotein, Reference proteome, Repeat,
UP_SEQ_FEATURE	chain:Protein phosphatase 1 regulatory subunit 7, modified residue, repeat:LRR 1, repeat:LRR 10, repeat:LRR 2, repeat:LRR 3, repeat:LRR 4, repeat:LRR 5, repeat:LRR 6, repeat:LRR 7, repeat:LRR 8, repeat:LRR 9,
ENSBTAG00000023144	protein tyrosine phosphatase, receptor type C(PTPRC)	Related Genes	Bos taurus
GOTERM_BP_DIRECT	T cell receptor signaling pathway,
GOTERM_CC_DIRECT	integral component of membrane,
GOTERM_MF_DIRECT	protein tyrosine phosphatase activity,
INTERPRO	Protein-tyrosine phosphatase, receptor/non-receptor type, Protein-tyrosine/Dual specificity phosphatase, Protein-tyrosine phosphatase, catalytic, Fibronectin, type III, Immunoglobulin-like fold, Protein-tyrosine phosphatase, active site, Leukocyte common antigen, Protein tyrosine phosphatase, receptor type, N-terminal,
KEGG_PATHWAY	Cell adhesion molecules (CAMs), T cell receptor signaling pathway, Fc gamma R-mediated phagocytosis, Primary immunodeficiency,
SMART	FN3, PTPc, PTPc_motif,
UP_KEYWORDS	Complete proteome, Hydrolase, Membrane, Protein phosphatase, Proteomics identification, Reference proteome, Signal, Transmembrane, Transmembrane helix,
ENSBTAG00000001182	septin 7(SEPT7)	Related Genes	Bos taurus
COG_ONTOLOGY	Cell division and chromosome partitioning / Cytoskeleton,
GOTERM_BP_DIRECT	mitotic nuclear division, regulation of embryonic cell shape, cell division, cilium morphogenesis,
GOTERM_CC_DIRECT	condensed chromosome kinetochore, spindle, axoneme, apical plasma membrane, midbody, septin complex, cleavage furrow,
GOTERM_MF_DIRECT	GTP binding,
INTERPRO	Septin 7, Septin, P-loop containing nucleoside triphosphate hydrolase,
PIR_SUPERFAMILY	septin,
UP_KEYWORDS	Acetylation, Cell cycle, Cell division, Cell projection, Centromere, Chromosome, Cilium, Coiled coil, Complete proteome, Cytoplasm, Cytoskeleton, GTP-binding, Kinetochore, Mitosis, Nucleotide-binding, Phosphoprotein, Reference proteome,
UP_SEQ_FEATURE	binding site:GTP, binding site:GTP; via amide nitrogen and carbonyl oxygen, chain:Septin-7, modified residue, nucleotide phosphate-binding region:GTP,
ENSBTAG00000021262	small nuclear ribonucleoprotein D3 polypeptide(SNRPD3)	Related Genes	Bos taurus
GOTERM_BP_DIRECT	spliceosomal complex assembly, spliceosomal snRNP assembly, RNA processing, protein methylation,
GOTERM_CC_DIRECT	commitment complex, nucleoplasm, U5 snRNP, U7 snRNP, U1 snRNP, U2 snRNP, U4 snRNP, U12-type spliceosomal complex, telomerase holoenzyme complex, cytosol, viral nucleocapsid, intracellular ribonucleoprotein complex, methylosome, pICln-Sm protein complex, SMN-Sm protein complex, extracellular exosome, prespliceosome, precatalytic spliceosome, catalytic step 2 spliceosome, spliceosomal tri-snRNP com…
GOTERM_MF_DIRECT	RNA binding, poly(A) RNA binding, telomerase RNA binding, histone pre-mRNA DCP binding, U7 snRNA binding,
INTERPRO	Ribonucleoprotein LSM domain, Like-Sm (LSM) domain, U6 snRNA-associated Sm-like protein LSm4/Small nuclear ribonucleoprotein Sm D1/D3,
KEGG_PATHWAY	Spliceosome, Systemic lupus erythematosus,
SMART	Sm,
UP_KEYWORDS	Complete proteome, Proteomics identification, Reference proteome, Ribonucleoprotein, Viral nucleoprotein, Virion,
ENSBTAG00000013240	solute carrier family 3 member 2(SLC3A2)	Related Genes	Bos taurus
GOTERM_BP_DIRECT	carbohydrate metabolic process,
GOTERM_CC_DIRECT	integral component of membrane,
GOTERM_MF_DIRECT	catalytic activity,
INTERPRO	Glycosyl hydrolase, family 13, catalytic domain, Glycosyl hydrolase, family 13, all-beta, Glycoside hydrolase, catalytic domain, Glycoside hydrolase, family 13, Glycoside hydrolase, superfamily,
KEGG_PATHWAY	Protein digestion and absorption,
SMART	Aamy,
UP_KEYWORDS	Complete proteome, Membrane, Proteomics identification, Reference proteome, Transmembrane, Transmembrane helix,
ENSBTAG00000023529	sperm flagellar 2(SPEF2)	Related Genes	Bos taurus
GOTERM_BP_DIRECT	immune system development, spermatogenesis, fertilization, multicellular organism aging, axoneme assembly, embryonic neurocranium morphogenesis, brain morphogenesis, respiratory system development,
GOTERM_CC_DIRECT	manchette, Golgi apparatus, motile cilium, sperm midpiece,
INTERPRO	Calponin homology domain, Protein of unknown function DUF1042, EF-hand-like domain, P-loop containing nucleoside triphosphate hydrolase,
UP_KEYWORDS	Cell projection, Cilium, Coiled coil, Complete proteome, Flagellum, Reference proteome,
ENSBTAG00000002105	testis expressed 261(TEX261)	Related Genes	Bos taurus
GOTERM_BP_DIRECT	ER to Golgi vesicle-mediated transport, positive regulation of apoptotic process,
GOTERM_CC_DIRECT	integral component of membrane, ER to Golgi transport vesicle, integral component of Golgi membrane, integral component of endoplasmic reticulum membrane,
GOTERM_MF_DIRECT	COPII adaptor activity,
INTERPRO	Transmembrane adaptor Erv26,
UP_KEYWORDS	Complete proteome, Membrane, Reference proteome, Transmembrane, Transmembrane helix,
UP_SEQ_FEATURE	chain:Protein TEX261, transmembrane region,
ENSBTAG00000016316	zinc finger ZZ-type and EF-hand domain containing 1(ZZEF1)	Related Genes	Bos taurus
GOTERM_MF_DIRECT	calcium ion binding, zinc ion binding,
INTERPRO	Zinc finger, ZZ-type, CUB domain, EF-hand domain, Anaphase-promoting complex, subunit 10/DOC domain, Galactose-binding domain-like, EF-hand-like domain,
SMART	EFh, ZnF_ZZ, SM01337,
UP_KEYWORDS	Complete proteome, Metal-binding, Reference proteome, Zinc, Zinc-finger,

## Sheet: SNP_Haplotypes_LD0.80
Functional Annotation Table
Help and Manual
Current Gene List: List_1
Current Background: Bos taurus
24 DAVID IDs
23 record(s)	Download File
ENSBTAG00000025718	3-hydroxymethyl-3-methylglutaryl-CoA lyase like 1(HMGCLL1)	Related Genes	Bos taurus
GOTERM_BP_DIRECT	ketone body biosynthetic process,
GOTERM_CC_DIRECT	endoplasmic reticulum, cytosol, membrane, perinuclear region of cytoplasm,
GOTERM_MF_DIRECT	hydroxymethylglutaryl-CoA lyase activity,
INTERPRO	Pyruvate carboxyltransferase, Aldolase-type TIM barrel,
KEGG_PATHWAY	Synthesis and degradation of ketone bodies, Valine, leucine and isoleucine degradation, Butanoate metabolism, Metabolic pathways, Peroxisome,
UP_KEYWORDS	Complete proteome, Reference proteome,
ENSBTAG00000010411	ADAM metallopeptidase with thrombospondin type 1 motif 8(ADAMTS8)	Related Genes	Bos taurus
GOTERM_CC_DIRECT	proteinaceous extracellular matrix,
GOTERM_MF_DIRECT	metalloendopeptidase activity, zinc ion binding,
INTERPRO	Thrombospondin, type 1 repeat, Peptidase M12B, ADAM/reprolysin, Peptidase M12B, propeptide, ADAM-TS Spacer 1, Peptidase M12B, ADAM-TS, Peptidase M12B, ADAM-TS8, Metallopeptidase, catalytic domain,
SMART	TSP1,
UP_KEYWORDS	Coiled coil, Complete proteome, Disulfide bond, Reference proteome, Signal,
ENSBTAG00000015541	DLC1 Rho GTPase activating protein(DLC1)	Related Genes	Bos taurus
GOTERM_BP_DIRECT	apoptotic process, activation of cysteine-type endopeptidase activity involved in apoptotic process, signal transduction, negative regulation of cell proliferation, regulation of cell shape, negative regulation of cell migration, regulation of Rho protein signal transduction, negative regulation of Rho protein signal transduction, positive regulation of protein dephosphorylation, positive regulat…
GOTERM_CC_DIRECT	nucleus, cytoplasm, cytosol, caveola, focal adhesion, membrane, cortical actin cytoskeleton, ruffle membrane,
GOTERM_MF_DIRECT	GTPase activator activity, lipid binding,
INTERPRO	Rho GTPase-activating protein domain, Sterile alpha motif domain, START domain, Rho GTPase activation protein, Sterile alpha motif/pointed domain, START-like domain,
SMART	START, RhoGAP,
UP_KEYWORDS	Cell junction, Complete proteome, Cytoplasm, GTPase activation, Membrane, Phosphoprotein, Reference proteome, Tumor suppressor,
UP_SEQ_FEATURE	chain:Rho GTPase-activating protein 7, compositionally biased region:Poly-Ser, compositionally biased region:Ser-rich, domain:Rho-GAP, domain:SAM, domain:START, modified residue,
ENSBTAG00000010976	KN motif and ankyrin repeat domains 1(KANK1)	Related Genes	Bos taurus
GOTERM_BP_DIRECT	negative regulation of neuron projection development, positive regulation of Wnt signaling pathway, negative regulation of cell migration, negative regulation of actin filament polymerization, negative regulation of Rho protein signal transduction, positive regulation of catenin import into nucleus, negative regulation of insulin receptor signaling pathway, positive regulation of wound healing, n…
GOTERM_CC_DIRECT	ruffle membrane,
INTERPRO	Ankyrin repeat, Ankyrin repeat-containing domain, Kank N-terminal motif,
SMART	ANK,
UP_KEYWORDS	ANK repeat, Coiled coil, Complete proteome, Reference proteome,
ENSBTAG00000011981	MYB proto-oncogene like 1(MYBL1)	Related Genes	Bos taurus
GOTERM_BP_DIRECT	regulation of transcription from RNA polymerase II promoter, cell differentiation,
GOTERM_CC_DIRECT	nucleus,
GOTERM_MF_DIRECT	RNA polymerase II core promoter proximal region sequence-specific DNA binding, RNA polymerase II transcription factor activity, sequence-specific DNA binding, transcriptional activator activity, RNA polymerase II core promoter proximal region sequence-specific binding, transcription factor activity, RNA polymerase II transcription factor recruiting, sequence-specific DNA binding, transcription re…
INTERPRO	SANT/Myb domain, Homeodomain-like, Transcription regulator Wos2-domain, C-myb, C-terminal, Myb-like domain, Myb domain,
SMART	SANT,
UP_KEYWORDS	Complete proteome, Reference proteome,
ENSBTAG00000003555	THADA, armadillo repeat containing(THADA)	Related Genes	Bos taurus
COG_ONTOLOGY	Function unknown,
INTERPRO	Armadillo-type fold, Domain of unknown function DUF2428, death-receptor-like,
UP_KEYWORDS	Coiled coil, Complete proteome, Reference proteome,
ENSBTAG00000009351	ataxin 10(ATXN10)	Related Genes	Bos taurus
GOTERM_BP_DIRECT	neuron projection development, cilium assembly,
GOTERM_CC_DIRECT	extracellular space, plasma membrane, dendrite, neuronal cell body, perinuclear region of cytoplasm,
INTERPRO	Armadillo-like helical, Armadillo-type fold, Ataxin-10 domain,
UP_KEYWORDS	Complete proteome, Cytoplasm, Methylation, Phosphoprotein, Reference proteome,
UP_SEQ_FEATURE	chain:Ataxin-10,
ENSBTAG00000013117	calcium voltage-gated channel auxiliary subunit alpha2delta 3(CACNA2D3)	Related Genes	Bos taurus
GOTERM_BP_DIRECT	regulation of calcium ion transport, calcium ion transmembrane transport,
GOTERM_CC_DIRECT	voltage-gated calcium channel complex,
GOTERM_MF_DIRECT	calcium channel regulator activity,
INTERPRO	von Willebrand factor, type A, VWA N-terminal, Voltage-dependent calcium channel, alpha-2/delta subunit, conserved region,
KEGG_PATHWAY	MAPK signaling pathway, Cardiac muscle contraction, Adrenergic signaling in cardiomyocytes, Oxytocin signaling pathway, Hypertrophic cardiomyopathy (HCM), Arrhythmogenic right ventricular cardiomyopathy (ARVC), Dilated cardiomyopathy,
SMART	VWA,
UP_KEYWORDS	Complete proteome, Reference proteome,
ENSBTAG00000004411	cysteine rich secretory protein LCCL domain containing 1(CRISPLD1)	Related Genes	Bos taurus
GOTERM_BP_DIRECT	face morphogenesis,
GOTERM_CC_DIRECT	extracellular exosome,
INTERPRO	Allergen V5/Tpx-1-related, LCCL, CAP domain, Allergen V5/Tpx-1-related, conserved site,
SMART	SCP, LCCL,
UP_KEYWORDS	Complete proteome, Reference proteome,
ENSBTAG00000020363	glucosidase, beta, acid 3 (cytosolic)(GBA3)	Related Genes	Bos taurus
GOTERM_BP_DIRECT	carbohydrate metabolic process, glycosylceramide catabolic process, glycosyl compound metabolic process,
GOTERM_CC_DIRECT	cytosol,
GOTERM_MF_DIRECT	beta-galactosidase activity, beta-glucosidase activity, glycosylceramidase activity,
INTERPRO	Glycoside hydrolase, family 1, Glycoside hydrolase, catalytic domain, Glycoside hydrolase, superfamily,
KEGG_PATHWAY	Cyanoamino acid metabolism, Starch and sucrose metabolism, Metabolic pathways,
UP_KEYWORDS	Complete proteome, Reference proteome, Signal,
ENSBTAG00000016284	interleukin 7(IL7)	Related Genes	Bos taurus
GOTERM_BP_DIRECT	T cell lineage commitment, immune response, humoral immune response, cell-cell signaling, organ morphogenesis, regulation of gene expression, positive regulation of B cell proliferation, negative regulation of apoptotic process, negative regulation of catalytic activity, bone resorption, positive regulation of T cell differentiation, positive regulation of organ growth, homeostasis of number of c…
GOTERM_CC_DIRECT	extracellular space,
GOTERM_MF_DIRECT	cytokine activity, interleukin-7 receptor binding, growth factor activity,
INTERPRO	Interleukin-7/interleukin-9, Interleukin-7, Interleukin-7/-9, conserved site,
KEGG_PATHWAY	Cytokine-cytokine receptor interaction, PI3K-Akt signaling pathway, Jak-STAT signaling pathway, Hematopoietic cell lineage,
PIR_SUPERFAMILY	interleukin-7,
SMART	IL7,
UP_KEYWORDS	Complete proteome, Cytokine, Disulfide bond, Glycoprotein, Growth factor, Reference proteome, Secreted, Signal,
UP_SEQ_FEATURE	chain:Interleukin-7, disulfide bond, glycosylation site:N-linked (GlcNAc...), signal peptide,
ENSBTAG00000044119	kinase suppressor of ras 2(KSR2)	Related Genes	Bos taurus
GOTERM_BP_DIRECT	intracellular signal transduction,
GOTERM_CC_DIRECT	intracellular,
GOTERM_MF_DIRECT	protein kinase activity, ATP binding, metal ion binding,
INTERPRO	Protein kinase, catalytic domain, Serine-threonine/tyrosine-protein kinase catalytic domain, Protein kinase C-like, phorbol ester/diacylglycerol binding, Serine/threonine-protein kinase, active site, Protein kinase-like domain, Kinase suppressor of RAS, SAM-like domain,
KEGG_PATHWAY	Ras signaling pathway,
SMART	C1, S_TKc,
UP_KEYWORDS	Complete proteome, Metal-binding, Reference proteome, Zinc,
ENSBTAG00000024379	leucine rich repeat containing 17(LRRC17)	Related Genes	Bos taurus
GOTERM_BP_DIRECT	negative regulation of osteoclast differentiation, bone marrow development,
GOTERM_CC_DIRECT	extracellular space,
INTERPRO	Cysteine-rich flanking region, C-terminal, Leucine-rich repeat, Leucine-rich repeat, typical subtype,
SMART	LRRCT, LRR_TYP,
UP_KEYWORDS	Complete proteome, Leucine-rich repeat, Reference proteome, Repeat,
ENSBTAG00000022150	matrix remodeling associated 5(MXRA5)	Related Genes	Bos taurus
COG_ONTOLOGY	Function unknown,
GOTERM_CC_DIRECT	extracellular exosome,
INTERPRO	Leucine-rich repeat-containing N-terminal, Cysteine-rich flanking region, C-terminal, Leucine-rich repeat, Leucine-rich repeat, typical subtype, Immunoglobulin subtype 2, Immunoglobulin subtype, Immunoglobulin-like domain, Immunoglobulin I-set, Immunoglobulin V-set, Immunoglobulin-like fold,
SMART	LRRNT, LRRCT, LRR_TYP, IGv, IGc2, IG,
UP_KEYWORDS	Complete proteome, Disulfide bond, Leucine-rich repeat, Reference proteome, Repeat, Signal,
ENSBTAG00000007489	nuclear receptor coactivator 3(NCOA3)	Related Genes	Bos taurus
GOTERM_BP_DIRECT	transcription, DNA-templated, intracellular receptor signaling pathway, cellular response to hormone stimulus, positive regulation of keratinocyte differentiation, positive regulation of transcription from RNA polymerase II promoter, cellular response to estradiol stimulus,
GOTERM_CC_DIRECT	nuclear chromatin, nucleus, nucleoplasm, cytoplasm, extracellular exosome,
GOTERM_MF_DIRECT	histone acetyltransferase activity, ligand-dependent nuclear receptor binding, ligand-dependent nuclear receptor transcription coactivator activity, nuclear hormone receptor binding,
INTERPRO	PAS domain, Nuclear receptor coactivator Src-1, Nuclear receptor coactivator, interlocking, Domain of unknown function DUF1518, Myc-type, basic helix-loop-helix (bHLH) domain, PAS fold, Nuclear receptor coactivator, Ncoa-type, interlocking, Steroid receptor coactivator, Nuclear receptor coactivator,
KEGG_PATHWAY	Thyroid hormone signaling pathway,
PIR_SUPERFAMILY	nuclear receptor coactivator,
SMART	PAS, HLH, SM01151,
UP_KEYWORDS	Complete proteome, Nucleus, Reference proteome, Transcription, Transcription regulation,
ENSBTAG00000020769	opioid binding protein/cell adhesion molecule like(OPCML)	Related Genes	Bos taurus
GOTERM_BP_DIRECT	cell adhesion,
GOTERM_CC_DIRECT	plasma membrane, anchored component of membrane, extracellular exosome,
INTERPRO	Immunoglobulin subtype 2, Immunoglobulin subtype, Immunoglobulin-like domain, Immunoglobulin I-set, Immunoglobulin-like fold,
SMART	IGc2, IG,
UP_KEYWORDS	Cell adhesion, Cell membrane, Complete proteome, Direct protein sequencing, Disulfide bond, Glycoprotein, GPI-anchor, Immunoglobulin domain, Lipoprotein, Membrane, Reference proteome, Repeat, Signal,
UP_SEQ_FEATURE	chain:Opioid-binding protein/cell adhesion molecule, disulfide bond, domain:Ig-like C2-type 1, domain:Ig-like C2-type 2, domain:Ig-like C2-type 3, glycosylation site:N-linked (GlcNAc...), lipid moiety-binding region:GPI-anchor amidated asparagine, propeptide:Removed in mature form, signal peptide,
ENSBTAG00000016026	procollagen C-endopeptidase enhancer 2(PCOLCE2)	Related Genes	Bos taurus
GOTERM_CC_DIRECT	extracellular region, collagen trimer, extracellular exosome,
GOTERM_MF_DIRECT	heparin binding, peptidase activator activity,
INTERPRO	CUB domain, Netrin domain, Tissue inhibitor of metalloproteinases-like, OB-fold, Netrin module, non-TIMP type,
SMART	CUB, C345C,
UP_KEYWORDS	Collagen, Complete proteome, Disulfide bond, Reference proteome, Secreted, Signal,
ENSBTAG00000018404	protein kinase, cGMP-dependent, type I(PRKG1)	Related Genes	Bos taurus
GOTERM_BP_DIRECT	neuron migration, protein phosphorylation, dendrite development, cGMP-mediated signaling, forebrain development, regulation of GTPase activity, relaxation of vascular smooth muscle, negative regulation of platelet aggregation, mitophagy in response to mitochondrial depolarization,
GOTERM_CC_DIRECT	cytoplasm, Golgi apparatus, cytosol, plasma membrane,
GOTERM_MF_DIRECT	cGMP-dependent protein kinase activity, calcium channel regulator activity, ATP binding, cGMP binding,
INTERPRO	Cyclic nucleotide-binding domain, Protein kinase, catalytic domain, AGC-kinase, C-terminal, cGMP-dependent kinase, Serine/threonine-protein kinase, active site, Protein kinase-like domain, RmlC-like jelly roll fold, Protein kinase, ATP binding site, Cyclic nucleotide-binding, conserved site, Cyclic nucleotide-binding-like,
KEGG_PATHWAY	cGMP-PKG signaling pathway, Vascular smooth muscle contraction, Gap junction, Platelet activation, Circadian entrainment, Long-term depression, Olfactory transduction, Regulation of lipolysis in adipocytes, Salivary secretion,
PIR_SUPERFAMILY	cGMP-dependent protein kinase,
SMART	cNMP, S_TK_X, S_TKc,
UP_KEYWORDS	3D-structure, Acetylation, Allosteric enzyme, Alternative splicing, ATP-binding, cGMP, cGMP-binding, Coiled coil, Complete proteome, Cytoplasm, Direct protein sequencing, Disulfide bond, Kinase, Nucleotide-binding, Phosphoprotein, Reference proteome, Serine/threonine-protein kinase, Transferase,
UP_SEQ_FEATURE	active site:Proton acceptor, binding site:ATP, chain:cGMP-dependent protein kinase 1, disulfide bond, domain:AGC-kinase C-terminal, domain:Protein kinase, modified residue, nucleotide phosphate-binding region:ATP, nucleotide phosphate-binding region:cGMP 1, nucleotide phosphate-binding region:cGMP 2, region of interest:Dimerization, site:Cleavage, splice variant,
ENSBTAG00000020192	protein phosphatase 2 regulatory subunit B'gamma(PPP2R5C)	Related Genes	Bos taurus
GOTERM_BP_DIRECT	signal transduction, negative regulation of cell proliferation, proteasome-mediated ubiquitin-dependent protein catabolic process,
GOTERM_CC_DIRECT	protein phosphatase type 2A complex, chromosome, centromeric region, nucleus,
GOTERM_MF_DIRECT	protein phosphatase type 2A regulator activity,
INTERPRO	Protein phosphatase 2A, regulatory B subunit, B56, Armadillo-type fold,
KEGG_PATHWAY	mRNA surveillance pathway, Sphingolipid signaling pathway, Oocyte meiosis, PI3K-Akt signaling pathway, AMPK signaling pathway, Adrenergic signaling in cardiomyocytes, Dopaminergic synapse,
PIR_SUPERFAMILY	serine/threonine-protein phosphatase 2A, subunit B56,
UP_KEYWORDS	Complete proteome, Reference proteome,
ENSBTAG00000023144	protein tyrosine phosphatase, receptor type C(PTPRC)	Related Genes	Bos taurus
GOTERM_BP_DIRECT	T cell receptor signaling pathway,
GOTERM_CC_DIRECT	integral component of membrane,
GOTERM_MF_DIRECT	protein tyrosine phosphatase activity,
INTERPRO	Protein-tyrosine phosphatase, receptor/non-receptor type, Protein-tyrosine/Dual specificity phosphatase, Protein-tyrosine phosphatase, catalytic, Fibronectin, type III, Immunoglobulin-like fold, Protein-tyrosine phosphatase, active site, Leukocyte common antigen, Protein tyrosine phosphatase, receptor type, N-terminal,
KEGG_PATHWAY	Cell adhesion molecules (CAMs), T cell receptor signaling pathway, Fc gamma R-mediated phagocytosis, Primary immunodeficiency,
SMART	FN3, PTPc, PTPc_motif,
UP_KEYWORDS	Complete proteome, Hydrolase, Membrane, Protein phosphatase, Proteomics identification, Reference proteome, Signal, Transmembrane, Transmembrane helix,
ENSBTAG00000005980	ras responsive element binding protein 1(RREB1)	Related Genes	Bos taurus
GOTERM_BP_DIRECT	negative regulation of transcription from RNA polymerase II promoter, regulation of transcription, DNA-templated, transcription from RNA polymerase II promoter, signal transduction, multicellular organism development, positive regulation of epithelial cell migration, positive regulation of mammary gland epithelial cell proliferation, positive regulation of substrate adhesion-dependent cell spread…
GOTERM_CC_DIRECT	nucleus, nucleoplasm, nucleolus, cytoplasm, extracellular exosome,
GOTERM_MF_DIRECT	RNA polymerase II core promoter sequence-specific DNA binding, transcription factor activity, sequence-specific DNA binding, sequence-specific DNA binding, transcription regulatory region DNA binding, metal ion binding,
INTERPRO	Zinc finger, C2H2, Zinc finger C2H2-type/integrase DNA-binding domain, Zinc finger, C2H2-like,
SMART	ZnF_C2H2,
UP_KEYWORDS	Complete proteome, Reference proteome,
ENSBTAG00000023529	sperm flagellar 2(SPEF2)	Related Genes	Bos taurus
GOTERM_BP_DIRECT	immune system development, spermatogenesis, fertilization, multicellular organism aging, axoneme assembly, embryonic neurocranium morphogenesis, brain morphogenesis, respiratory system development,
GOTERM_CC_DIRECT	manchette, Golgi apparatus, motile cilium, sperm midpiece,
INTERPRO	Calponin homology domain, Protein of unknown function DUF1042, EF-hand-like domain, P-loop containing nucleoside triphosphate hydrolase,
UP_KEYWORDS	Cell projection, Cilium, Coiled coil, Complete proteome, Flagellum, Reference proteome,
ENSBTAG00000009242	zinc finger protein 638(ZNF638)	Related Genes	Bos taurus
GOTERM_BP_DIRECT	RNA splicing,
GOTERM_CC_DIRECT	nucleoplasm,
GOTERM_MF_DIRECT	nucleotide binding, zinc ion binding, poly(A) RNA binding,
INTERPRO	RNA recognition motif domain, Zinc finger, C2H2-type matrin, Zinc finger, U1-type, Zinc finger, C2H2, Nucleotide-binding, alpha-beta plait, Zinc finger, C2H2-like, Zinc finger, double-stranded RNA binding,
SMART	ZnF_C2H2, RRM, ZnF_U1,
UP_KEYWORDS	Complete proteome, Metal-binding, Nucleus, Reference proteome, Zinc, Zinc-finger,
